# Supplementary material
Source: PubMed Central journal article supplement (PMC5316383)
Supplement: NIHMS802548-supplement-Table_S4.pdf [file NIHMS802548-supplement-Table_S4.pdf]

**Table S4.** Coverage of 203 CPIC/PharmGKB variant positions

| Gene           | Genomic position<br>(GRCh37) | mRNA                       | CPIC/PharmGKB variant | GS<br>HQ<br>GT cts<br>(N=5) | ES<br>HQ<br>GT cts<br>(N=973) | Chip<br>HQ<br>GT cts<br>(N=5) |
|----------------|------------------------------|----------------------------|-----------------------|-----------------------------|-------------------------------|-------------------------------|
| <i>MTHFR</i>   | 1:11856378                   | NM_005957.4:c.665C>T       | p.Ala222Val           | 5                           | 953                           | 0                             |
| <i>DPYD</i>    | 1:97547947                   | NM_000110.3:c.2846A>T      | p.Asp949Val           | 5                           | 972                           | 0                             |
| <i>DPYD</i>    | 1:97770920                   | NM_000110.3:c.2194G>A      | p.Val732Ile           | 5                           | 973                           | 0                             |
| <i>DPYD</i>    | 1:97915614                   | NM_000110.3:c.1905+1G>A    | IVS14+1G>A            | 5                           | 923                           | 5                             |
| <i>DPYD</i>    | 1:97981343                   | NM_000110.3:c.1679T>A      | p.Ile560Asn           | 5                           | 973                           | 5                             |
| <i>DPYD</i>    | 1:97981395                   | NM_000110.3:c.1627A>G      | p.Ile543Val           | 5                           | 973                           | 0                             |
| <i>DPYD</i>    | 1:97981421                   | NM_000110.3:c.1601G>A      | p.Ser534Asn           | 5                           | 971                           | 5                             |
| <i>DPYD</i>    | 1:98348885                   | NM_000110.3:c.85T>C        | p.Cys29Arg            | 5                           | 973                           | 5                             |
| <i>XPC</i>     | 3:14187449                   | NM_004628.4:c.2815C>A      | p.Gln939Lys           | 5                           | 544                           | 0                             |
| <i>TPMT</i>    | 6:18130918                   | NM_000367.3:c.719A>G       | p.Tyr240Cys           | 5                           | 969                           | 5                             |
| <i>TPMT</i>    | 6:18131012                   | NM_000367.3:c.626-1G>A     | IVS8-1G>A             | 5                           | 965                           | 5                             |
| <i>TPMT</i>    | 6:18139214                   | NM_000367.3:c.474C>T       | p.Ile158Ile           | 5                           | 973                           | 5                             |
| <i>TPMT</i>    | 6:18139228                   | NM_000367.3:c.460G>A       | p.Ala154Thr           | 5                           | 973                           | 5                             |
| <i>TPMT</i>    | 6:18143955                   | NM_000367.3:c.238G>C       | p.Ala80Pro            | 5                           | 967                           | 5                             |
| <i>TPMT</i>    | 6:18155397                   | NA                         | Promoter              | 0                           | 0                             | 0                             |
| <i>CFTR</i>    | 7:117174372                  | NM_000492.3:c.532G>A       | p.Gly178Arg           | 5                           | 971                           | 0                             |
| <i>CFTR</i>    | 7:117199645_117199647        | NM_000492.3:c.1520_1522del | p.Phe508del           | 5                           | 918                           | 0                             |
| <i>CFTR</i>    | 7:117199646_117199648        | NM_000492.3:c.1521_1523del | p.Phe508del           | 5                           | 897                           | 0                             |
| <i>CFTR</i>    | 7:117227853                  | NM_000492.3:c.1645A>C      | p.Ser549Arg           | 5                           | 968                           | 0                             |
| <i>CFTR</i>    | 7:117227854                  | NM_000492.3:c.1646G>A      | p.Ser549Asn           | 5                           | 967                           | 0                             |
| <i>CFTR</i>    | 7:117227855                  | NM_000492.3:c.1647T>G      | p.Ser549Arg           | 5                           | 968                           | 0                             |
| <i>CFTR</i>    | 7:117227859                  | NM_000492.3:c.1651G>A      | p.Gly551Ser           | 5                           | 962                           | 0                             |
| <i>CFTR</i>    | 7:117227860                  | NM_000492.3:c.1652G>A      | p.Gly551Asp           | 5                           | 966                           | 0                             |
| <i>CFTR</i>    | 7:117282505                  | NM_000492.3:c.3731G>A      | p.Gly1244Glu          | 5                           | 969                           | 0                             |
| <i>CFTR</i>    | 7:117282526                  | NM_000492.3:c.3752G>A      | p.Ser1251Asn          | 5                           | 967                           | 0                             |
| <i>CFTR</i>    | 7:117282537                  | NM_000492.3:c.3763T>C      | p.Ser1255Pro          | 5                           | 967                           | 0                             |
| <i>CFTR</i>    | 7:117304824                  | NM_000492.3:c.4046G>A      | p.Gly1349Asp          | 5                           | 973                           | 0                             |
| <i>EGFR</i>    | 7:55259515                   | NM_005228.3:c.2573T>G      | p.Leu858Arg           | 5                           | 943                           | 0                             |
| <i>CYP3A5</i>  | 7:99270539                   | NM_000777.3:c.219-237G>A   | IVS3-1G>A             | 4                           | 59                            | 5                             |
| <i>CYP2C19</i> | 10:96519061                  | NA                         | Intergenic            | 5                           | 0                             | 0                             |
| <i>CYP2C19</i> | 10:96521574                  | NM_000769.2:c.-889T>G      | Promoter              | 5                           | 0                             | 0                             |

|         |              |                           |               |   |     |   |
|---------|--------------|---------------------------|---------------|---|-----|---|
| CYP2C19 | 10:96521657  | NM_000769.2:c.-806C>T     | Promoter      | 5 | 0   | 5 |
| CYP2C19 | 10:96522365  | NM_000769.2:c.-98T>C      | Promoter      | 5 | 661 | 0 |
| CYP2C19 | 10:96522463  | NM_000769.1:c.1A>G        | p.Met1Val     | 5 | 959 | 5 |
| CYP2C19 | 10:96522561  | NM_000769.2:c.99C>T       | p.Pro33Pro    | 5 | 967 | 0 |
| CYP2C19 | 10:96534475  | NM_000769.2:c.169-340T>G  | IVS1-340T>G   | 5 | 0   | 0 |
| CYP2C19 | 10:96534584  | NM_000769.2:c.169-231G>A  | IVS1-231G>A   | 5 | 66  | 0 |
| CYP2C19 | 10:96534768  | NM_000769.2:c.169-47G>A   | IVS1-47G>A    | 5 | 889 | 0 |
| CYP2C19 | 10:96534922  | NM_000769.2:c.276G>C      | p.Glu92Glu    | 5 | 973 | 5 |
| CYP2C19 | 10:96535124  | NM_000769.2:c.332-23A>G   | IVS2-23A>G    | 5 | 968 | 0 |
| CYP2C19 | 10:96535173  | NM_000769.1:c.358T>C      | p.Trp120Arg   | 5 | 973 | 5 |
| CYP2C19 | 10:96535210  | NM_000769.1:c.395G>A      | p.Arg132Gln   | 5 | 972 | 5 |
| CYP2C19 | 10:96535222  | NM_000769.1:c.407T>A      | p.Met136Lys   | 5 | 971 | 0 |
| CYP2C19 | 10:96535296  | NM_000769.2:c.481G>C      | p.Ala161Pro   | 5 | 958 | 0 |
| CYP2C19 | 10:96535378  | NM_000769.2:c.481+332T>C  | IVS3+332T>C   | 5 | 715 | 0 |
| CYP2C19 | 10:96540410  | NM_000769.1:c.636G>A      | p.Trp212X     | 5 | 886 | 5 |
| CYP2C19 | 10:96541373  | NM_000769.2:c.643-205A>G  | IVS4-205A>G   | 5 | 4   | 0 |
| CYP2C19 | 10:96541616  | NM_000769.1:c.681G>A      | p.Pro227Pro   | 5 | 774 | 5 |
| CYP2C19 | 10:96541748  | NM_000769.1:c.813G>A      | p.Met271Ile   | 5 | 907 | 0 |
| CYP2C19 | 10:96541756  | NM_000769.1:c.819+2T>A    | IVS5+2T>A     | 5 | 884 | 5 |
| CYP2C19 | 10:96541982  | NM_000769.2:c.819+228A>G  | IVS5+228A>G   | 5 | 24  | 0 |
| CYP2C19 | 10:96580202  | NM_000769.2:c.820-51C>G   | IVS4-51C>G    | 4 | 912 | 0 |
| CYP2C19 | 10:96602398  | NM_000769.2:c.962-196T>A  | IVS6-196T>A   | 5 | 69  | 0 |
| CYP2C19 | 10:96602622  | NM_000769.2:c.990C>T      | p.Val330Val   | 5 | 887 | 0 |
| CYP2C19 | 10:96602623  | NM_000769.2:c.991A>G      | p.Ile331Val   | 5 | 880 | 5 |
| CYP2C19 | 10:96602653  | NM_000769.1:c.1021G>A     | p.Asp341Asn   | 5 | 912 | 0 |
| CYP2C19 | 10:96602710  | NM_000769.2:c.1078G>A     | p.Asp360Asn   | 5 | 962 | 0 |
| CYP2C19 | 10:96602711  | NM_000769.1:c.1079A>T     | p.Asp360Val   | 5 | 960 | 0 |
| CYP2C19 | 10:96609710  | NM_000769.1:c.1186C>G     | p.His396Asp   | 5 | 972 | 0 |
| CYP2C19 | 10:96609737  | NM_000769.1:c.1213G>A     | p.Glu405Lys   | 5 | 970 | 0 |
| CYP2C19 | 10:96609775  | NM_000769.2:c.1251A>C     | p.Gly417Gly   | 5 | 970 | 0 |
| CYP2C19 | 10:96609785  | NM_000769.1:c.1261A>C     | p.Lys421Gln   | 5 | 967 | 0 |
| CYP2C19 | 10:96612495  | NM_000769.1:c.1297C>T     | p.Arg433Trp   | 5 | 973 | 5 |
| CYP2C9  | 10:96702047  | NM_000771.3:c.430C>T      | p.Arg144Cys   | 4 | 973 | 5 |
| CYP2C9  | 10:96741053  | NM_000771.3:c.1075A>C     | p.Ile359Leu   | 5 | 958 | 5 |
| ANKK1   | 11:113270828 | NM_178510.1:c.2137G>A     | p.Glu713Lys   | 4 | 546 | 0 |
| GRIK4   | 11:120663363 | NM_014619.3:c.83-10039T>C | IVS3-10039T>C | 5 | 0   | 0 |

|              |                      |                             |                    |   |     |   |
|--------------|----------------------|-----------------------------|--------------------|---|-----|---|
| SLCO1B1      | 12:21283322          | NM_006446.4:c.-910G>A       | Promoter           | 5 | 0   | 5 |
| SLCO1B1      | 12:21329738          | NM_006446.4:c.388A>G        | p.Asn130Asp        | 5 | 962 | 5 |
| SLCO1B1      | 12:21331549          | NM_006446.4:c.521T>C        | p.Val174Ala        | 5 | 973 | 5 |
| VKORC1       | 16:31102321          | NM_024006.4:c.*134G>A       | 3'UTR              | 5 | 335 | 5 |
| VKORC1       | 16:31104878          | NM_024006.4:c.174-136C>T    | IVS1-136C>T        | 4 | 249 | 5 |
| VKORC1       | 16:31107689          | NA                          | Promoter           | 5 | 0   | 5 |
| CYP4F2       | 19:15990431          | NM_001082.3:c.1297G>A       | p.Val433Met        | 5 | 973 | 5 |
| IFNL3, IFNL4 | 19:39738787          | NM_001276254.2:c.151-152G>A | IVS1-152G>A        | 3 | 3   | 0 |
| IFNL3, IFNL4 | 19:39743165          | NA                          | Intergenic         | 5 | 0   | 0 |
| CYP2D6       | 22:42522312          | NM_000106.5:c.*75+189A>G    | Intergenic         | 4 | 76  | 0 |
| CYP2D6       | 22:42522392          | NM_000106.5:c.*75+109C>T    | Intergenic         | 4 | 253 | 0 |
| CYP2D6       | 22:42522613          | NM_000106.5:c.1457G>C       | p.Ser486Thr        | 4 | 824 | 5 |
| CYP2D6       | 22:42522660_42522668 | NM_000106.5:c.1402_1410dup  | p.Val468_Thr470dup | 4 | 447 | 1 |
| CYP2D6       | 22:42522678          | NM_000106.5:c.1392C>T       | p.Phe464Phe        | 4 | 335 | 0 |
| CYP2D6       | 22:42522749          | NM_000106.5:c.1321C>T       | p.Arg441Cys        | 0 | 254 | 0 |
| CYP2D6       | 22:42522751          | NM_000106.5:c.1319G>A       | p.Arg440His        | 0 | 255 | 0 |
| CYP2D6       | 22:42522906          | NM_000106.5:c.1262T>C       | p.Leu421Pro        | 4 | 794 | 0 |
| CYP2D6       | 22:42522916          | NM_000106.5:c.1252G>C       | p.Glu418Gln        | 4 | 842 | 0 |
| CYP2D6       | 22:42522940          | NM_000106.5:c.1228C>T       | p.Glu410Lys        | 4 | 913 | 0 |
| CYP2D6       | 22:42522958          | NM_000106.5:c.1210A>C       | p.Lys404Gln        | 4 | 880 | 0 |
| CYP2D6       | 22:42522965          | NM_000106.5:c.1203G>A       | p.Ser401Ser        | 4 | 862 | 0 |
| CYP2D6       | 22:42523003          | NM_000106.5:c.1174-9C>T     | IVS7-9C>T          | 3 | 407 | 0 |
| CYP2D6       | 22:42523209          | NM_000106.5:c.1174-215A>G   | IVS7-215A>G        | 4 | 250 | 0 |
| CYP2D6       | 22:42523211          | NM_000106.5:c.1174-217A>G   | IVS7-217A>G        | 4 | 207 | 0 |
| CYP2D6       | 22:42523302          | NM_000106.5:c.1173+147G>A   | IVS7+147G>A        | 4 | 257 | 0 |
| CYP2D6       | 22:42523358          | NM_000106.5:c.1173+91C>A    | IVS7+91C>A         | 4 | 381 | 0 |
| CYP2D6       | 22:42523409          | NM_000106.5:c.1173+40A>C    | IVS7+40A>C         | 5 | 870 | 0 |
| CYP2D6       | 22:42523475          | NM_000106.5:c.1147G>A       | p.Glu383Lys        | 4 | 966 | 0 |
| CYP2D6       | 22:42523505          | NM_000106.5:c.1117G>A       | p.Gly373Ser        | 4 | 832 | 0 |
| CYP2D6       | 22:42523533_42523534 | NM_000106.5:c.1088_1089dup  | p.Gln364CysfsX12   | 4 | 970 | 5 |
| CYP2D6       | 22:42523539          | NM_000106.5:c.1083T>C       | p.His310His        | 4 | 897 | 0 |
| CYP2D6       | 22:42523592          | NM_000106.5:c.1030C>T       | p.Arg344X          | 4 | 962 | 5 |
| CYP2D6       | 22:42523610          | NM_000106.5:c.1012G>A       | p.Val338Met        | 4 | 964 | 5 |
| CYP2D6       | 22:42523621          | NM_000106.5:c.1001A>C       | p.Glu334Ala        | 4 | 964 | 0 |
| CYP2D6       | 22:42523763          | NM_000106.5:c.985+81G>A     | IVS6+81G>A         | 1 | 544 | 0 |
| CYP2D6       | 22:42523805          | NM_000106.5:c.985+39G>A     | IVS6+39G>A         | 4 | 874 | 5 |

|        |                      |                                                |                                          |   |     |   |
|--------|----------------------|------------------------------------------------|------------------------------------------|---|-----|---|
| CYP2D6 | 22:42523843          | NM_000106.5:c.985+1G>C                         | IVS6+1G>C                                | 4 | 935 | 5 |
| CYP2D6 | 22:42523854          | NM_000106.5:c.975G>A                           | p.Pro325Pro                              | 4 | 941 | 0 |
| CYP2D6 | 22:42523855          | NM_000106.5:c.974C>T                           | p.Pro325Leu                              | 4 | 945 | 0 |
| CYP2D6 | 22:42523858          | NM_000106.5:c.971A>C                           | p.His324Pro                              | 4 | 949 | 5 |
| CYP2D6 | 22:42523943          | NM_000106.5:c.886C>T                           | p.Arg296Cys                              | 4 | 954 | 5 |
| CYP2D6 | 22:42523944          | NM_000106.5:c.885G>A                           | p.Leu295Leu                              | 4 | 933 | 0 |
| CYP2D6 | 22:42524132          | NM_000106.5:c.843+44G>A                        | IVS5+44G>A                               | 3 | 343 | 0 |
| CYP2D6 | 22:42524176_42524178 | NM_000106.5:c.841_843del                       | p.Lys281del                              | 4 | 619 | 5 |
| CYP2D6 | 22:42524203_42524206 | NM_000106.5:c.813_816del                       | p.Thr272ArgfsX25                         | 4 | 727 | 5 |
| CYP2D6 | 22:42524217          | NM_000106.5:c.802C>T                           | p.Pro268Ser                              | 3 | 799 | 0 |
| CYP2D6 | 22:42524218          | NM_000106.5:c.801C>A                           | p.Pro267Pro                              | 3 | 776 | 0 |
| CYP2D6 | 22:42524219_42524220 | NM_000106.5:c.799_800insG                      | p.Pro267ArgfsX7                          | 3 | 796 | 0 |
| CYP2D6 | 22:42524237          | NM_000106.5:c.782C>T                           | p.Thr261Ile                              | 3 | 892 | 0 |
| CYP2D6 | 22:42524244          | NM_000106.5:c.775del                           | p.Arg259GlyfsX2                          | 3 | 907 | 5 |
| CYP2D6 | 22:42524251_42524254 | NM_000106.5:c.765_768del                       | p.Thr256SerfsX4                          | 4 | 951 | 5 |
| CYP2D6 | 22:42524310          | NM_000106.5:c.709G>T                           | p.Ala237Ser                              | 5 | 969 | 0 |
| CYP2D6 | 22:42524313          | NM_000106.5:c.706C>T                           | p.Leu236Leu                              | 5 | 968 | 0 |
| CYP2D6 | 22:42524323          | NM_000106.5:c.696T>C                           | p.Trp262Trp                              | 5 | 959 | 0 |
| CYP2D6 | 22:42524490          | NM_000106.5:c.667-138C>T                       | IVS4-138C>T                              | 4 | 249 | 0 |
| CYP2D6 | 22:42524502          | NM_000106.5:c.667-150G>A                       | IVS4-150G>A                              | 4 | 223 | 0 |
| CYP2D6 | 22:42524664          | NM_000106.5:c.666+122A>C                       | IVS4+122A>C                              | 4 | 258 | 0 |
| CYP2D6 | 22:42524696          | NM_000106.5:c.666+90A>G                        | IVS4+90A>G                               | 5 | 400 | 0 |
| CYP2D6 | 22:42524814          | NM_000106.5:c.638T>C                           | p.Leu213Pro                              | 4 | 843 | 0 |
| CYP2D6 | 22:42524815          | NM_000106.5:c.637C>T                           | p.Leu213Leu                              | 4 | 837 | 0 |
| CYP2D6 | 22:42524817          | NM_000106.5:c.635G>A                           | p.Gly212Glu                              | 4 | 837 | 0 |
| CYP2D6 | 22:42524819_42524820 | NM_000106.5:c.632_633insC                      | p.Glu211AspfsX43                         | 4 | 830 | 5 |
| CYP2D6 | 22:42524906_42524907 | NM_000106.5:c.545_546insTA                     | p.Ser183ArgfsX4                          | 4 | 361 | 0 |
| CYP2D6 | 22:42524924          | NM_000106.5:c.528T>C                           | p.Gly126Gly                              | 3 | 350 | 0 |
| CYP2D6 | 22:42524929_42524930 | NM_000106.5:c.522_523insTTTCGCC<br>CCTTTCGCCCC | p.Pro174_Asn175insPheArg<br>ProPheArgPro | 4 | 333 | 5 |
| CYP2D6 | 22:42524935          | NM_000106.5:c.517C>T                           | p.Arg173Cys                              | 4 | 329 | 0 |
| CYP2D6 | 22:42524947          | NM_000106.5:c.506-1G>A                         | IVS3-1G>A                                | 3 | 445 | 5 |
| CYP2D6 | 22:42525035          | NM_000106.5:c.505G>T, G>A                      | p.Gly169X, p.Gly169Arg                   | 4 | 500 | 5 |
| CYP2D6 | 22:42525036          | NM_000106.5:c.504C>T                           | p.Ser168Ser                              | 4 | 471 | 0 |
| CYP2D6 | 22:42525044          | NM_000106.5:c.496A>G                           | p.Asn166Asp                              | 3 | 472 | 0 |
| CYP2D6 | 22:42525069          | NM_000106.5:c.471C>T                           | p.Ala157Ala                              | 4 | 495 | 0 |

|        |                      |                          |                  |   |     |   |
|--------|----------------------|--------------------------|------------------|---|-----|---|
| CYP2D6 | 22:42525073          | NM_000106.5:c.467A>C     | p.Glu156Ala      | 4 | 497 | 0 |
| CYP2D6 | 22:42525077          | NM_000106.5:c.463G>A     | p.Glu155Lys      | 4 | 505 | 0 |
| CYP2D6 | 22:42525086          | NM_000106.5:c.454del     | p.Trp152GlyfsX2  | 4 | 517 | 5 |
| CYP2D6 | 22:42525132          | NM_000106.5:c.408G>C     | p.Val136Val      | 4 | 563 | 5 |
| CYP2D6 | 22:42525134          | NM_000106.5:c.406G>A     | p.Val136Met      | 4 | 543 | 4 |
| CYP2D6 | 22:42525176          | NM_000106.5:c.364G>T     | p.Ala122Ser      | 3 | 512 | 0 |
| CYP2D6 | 22:42525182          | NM_000106.5:c.358T>A     | p.Phe120Ile      | 3 | 497 | 0 |
| CYP2D6 | 22:42525195          | NM_000106.5:c.353-8A>G   | IVS2-8A>G        | 3 | 463 | 0 |
| CYP2D6 | 22:42525280          | NM_000106.5:c.353-93C>T  | IVS2-93C>T       | 4 | 254 | 0 |
| CYP2D6 | 22:42525733          | NM_000106.5:c.352+7A>G   | IVS2+7T>C        | 0 | 681 | 0 |
| CYP2D6 | 22:42525754          | NM_000106.5:c.338G>A     | p.Gly113Glu      | 1 | 608 | 0 |
| CYP2D6 | 22:42525772          | NM_000106.5:c.320C>T     | p.Thr107Ile      | 1 | 494 | 5 |
| CYP2D6 | 22:42525796          | NM_000106.5:c.296C>G     | p.Ala99Gly       | 0 | 191 | 0 |
| CYP2D6 | 22:42525811          | NM_000106.5:c.281A>G     | p.His94Arg       | 1 | 324 | 0 |
| CYP2D6 | 22:42525819          | NM_000106.5:c.273G>T     | p.Leu91Leu       | 1 | 185 | 0 |
| CYP2D6 | 22:42525821          | NM_000106.5:c.271C>A     | p.Leu91Met       | 1 | 283 | 0 |
| CYP2D6 | 22:42525823          | NM_000106.5:c.269C>T     | p.Ala90Val       | 1 | 182 | 0 |
| CYP2D6 | 22:42525906          | NM_000106.5:c.186G>A     | p.Arg62Arg       | 0 | 6   | 0 |
| CYP2D6 | 22:42525912          | NM_000106.5:c.181-1G>C   | IVS1-1G>C        | 0 | 6   | 5 |
| CYP2D6 | 22:42525950          | NM_000106.5:c.181-39A>C  | IVS1-39T>G       | 0 | 8   | 0 |
| CYP2D6 | 22:42526048          | NM_000106.5:c.181-137G>C | Intronic         | 0 | 1   | 0 |
| CYP2D6 | 22:42526192          | NM_000106.5:c.181-281del | IVS1-281del      | 2 | 0   | 0 |
| CYP2D6 | 22:42526484          | NM_000106.5:c.180+130T>G | IVS1+130G>T      | 4 | 153 | 0 |
| CYP2D6 | 22:42526567          | NM_000106.5:c.180+47A>G  | IVS1+47T>C       | 4 | 476 | 0 |
| CYP2D6 | 22:42526571          | NM_000106.5:c.180+43G>C  | IVS1+43C>G       | 4 | 498 | 0 |
| CYP2D6 | 22:42526573          | NM_000106.5:c.180+41A>C  | IVS1+41C>A       | 4 | 512 | 0 |
| CYP2D6 | 22:42526580          | NM_000106.5:c.180+34C>G  | IVS1+34C>G       | 4 | 535 | 0 |
| CYP2D6 | 22:42526656_42526657 | NM_000106.5:c.137dup     | p.Leu47ThrfsX207 | 5 | 614 | 5 |
| CYP2D6 | 22:42526670          | NM_000106.5:c.124G>A     | p.Gly42Arg       | 4 | 594 | 5 |
| CYP2D6 | 22:42526694          | NM_000106.5:c.100C>T     | p.Pro34Ser       | 4 | 563 | 5 |
| CYP2D6 | 22:42526712          | NM_000106.5:c.82C>T      | p.Arg28Cys       | 3 | 439 | 0 |
| CYP2D6 | 22:42526717          | NM_000106.5:c.77G>A      | P.Arg26His       | 4 | 448 | 0 |
| CYP2D6 | 22:42526721          | NM_000106.5:c.73C>T      | p.Arg25Trp       | 3 | 483 | 0 |
| CYP2D6 | 22:42526763          | NM_000106.5:c.31G>A      | p.Val11Met       | 4 | 529 | 0 |
| CYP2D6 | 22:42527422          | NM_000106.5:c.-629T>C    | Promoter         | 4 | 0   | 0 |
| CYP2D6 | 22:42527471          | NM_000106.5:c.-678C>T    | Promoter         | 4 | 0   | 0 |

|        |                       |                                   |                            |   |     |   |
|--------|-----------------------|-----------------------------------|----------------------------|---|-----|---|
| CYP2D6 | 22:42527485_42527488  | NM_000106.5:c.-695_-692del        | Promoter                   | 4 | 0   | 0 |
| CYP2D6 | 22:42527533           | NM_000106.5:c.-740C>T             | Promoter                   | 5 | 0   | 0 |
| CYP2D6 | 22:42527542_42527543  | NM_000106.5:c.-750_-749del        | Promoter                   | 4 | 0   | 0 |
| CYP2D6 | 22:42527793           | NM_000106.5:c.-1001C>T            | Promoter                   | 5 | 1   | 0 |
| CYP2D6 | 22:42527804           | NM_000106.5:c.-1011T>C            | Promoter                   | 5 | 0   | 0 |
| CYP2D6 | 22:42527886_42527887  | NM_000106.5:c.-1094_-1093insT     | Promoter                   | 4 | 0   | 0 |
| CYP2D6 | 22:42528028           | NM_000106.5:c.-1235G>A            | Promoter                   | 2 | 0   | 0 |
| CYP2D6 | 22:42528030_42528031  | NM_000106.5:c.-1238_-1237insAA    | Promoter                   | 0 | 0   | 0 |
| CYP2D6 | 22:42528051_42528052  | NM_000106.5:c.-1259_-1258insTTTTT | Promoter                   | 1 | 0   | 0 |
| CYP2D6 | 22:42528096           | NM_000106.5:c.-1299C>T            | Promoter                   | 4 | 0   | 0 |
| CYP2D6 | 22:42528224           | NM_000106.5:c.-1427G>A            | Promoter                   | 5 | 0   | 0 |
| CYP2D6 | 22:42528336           | NM_000106.5:c.-1543C>T            | Promoter                   | 4 | 0   | 0 |
| CYP2D6 | 22:42528377           | NM_000106.5:c.-1584G>C            | Promoter                   | 5 | 0   | 0 |
| CYP2D6 | 22:42528393_42528394  | NM_000106.5:c.-1601_-1600del      | Promoter                   | 5 | 0   | 0 |
| CYP2D6 | 22:42528568           | NM_000106.5:c.-1772C>T            | Promoter                   | 4 | 3   | 5 |
| G6PD   | X:153760484           | NM_001042351.1:c.1376G>C          | p.Arg459Pro or p.Arg459Leu | 0 | 787 | 5 |
| G6PD   | X:153760654           | NM_001042351.2:c.1311C>T          | p.Tyr437Tyr                | 1 | 849 | 0 |
| G6PD   | X:153761205           | NM_001042351.2:c.1003G>A          | p.Ala335Thr                | 1 | 595 | 5 |
| G6PD   | X:153761206_153761208 | NM_001042351.1:c.1000_1002del     | p.Thr334del                | 2 | 614 | 0 |
| G6PD   | X:153761240           | NM_001042351.1:c.968T>C           | p.Leu323Pro                | 3 | 718 | 0 |
| G6PD   | X:153761259           | NM_001042351.1:c.949G>A           | p.Glu317Lys                | 4 | 795 | 0 |
| G6PD   | X:153761337           | NM_001042351.2:c.871G>A           | p.Val291Met                | 2 | 803 | 0 |
| G6PD   | X:153761830           | NM_001042351.1:c.825G>C           | p.Lys275Asn                | 0 | 944 | 0 |
| G6PD   | X:153762340           | NM_001042351.1:c.680G>T or G>A    | p.Arg227Leu or p.Arg227Gln | 3 | 925 | 0 |
| G6PD   | X:153762634           | NM_001042351.2:c.563C>T           | p.Ser188Phe                | 3 | 930 | 5 |
| G6PD   | X:153763492           | NM_001042351.1:c.376A>G           | p.Asn126Asp                | 2 | 753 | 5 |
| G6PD   | X:153763531           | NM_001042351.1:c.337G>A           | p.Asp113Asn                | 0 | 560 | 5 |
| G6PD   | X:153764217           | NM_001042351.2:c.202G>A           | p.Val68Met                 | 0 | 887 | 0 |
| G6PD   | X:153764383           | NM_001042351.1:c.131C>G           | p.Ala44Gly                 | 2 | 750 | 0 |

Chip, Affymetrix DMET Plus (Drug Metabolizing Enzymes and Transporters array); CPIC, Clinical Pharmacogenetics Implementation Consortium; GRCh37, Genome Reference Consortium human genome (build 37); HQ GT cts, high quality genotype counts (genotype quality score  $\geq 50$  for exomes and genomes, genotype confidence score  $< 0.05$  for chip); N, number of individuals tested per platform; PharmGKB, Pharmacogenomics Knowledgebase; SEM, standard error of the mean.

Coverage of 203 pharmacogenetic positions selected from CPIC and PharmGKB were assessed in 973 exomes, 5 genomes, and 5 chip data. Coverage of the 203 variant positions from 3 platforms was assessed in coding and noncoding regions.

Summary statistics

| Platform/location  | Mean   | SEM  | N   |
|--------------------|--------|------|-----|
| Agilent38Mb/coding | 91.38  | 7.46 | 393 |
| Agilent50Mb/coding | 109.17 | 4.87 | 318 |
| TruSeqv1/coding    | 118.01 | 2.31 | 147 |
| TruSeqv2/coding    | 122.11 | 1.78 | 115 |
| Genome/coding      | 100.60 | 0.65 | 5   |
| Chip/coding        | 44.80  | 0.33 | 5   |

| Platform/location     | Mean  | SEM  | N   |
|-----------------------|-------|------|-----|
| Agilent38Mb/noncoding | 13.66 | 6.63 | 393 |
| Agilent50Mb/noncoding | 18.36 | 6.73 | 318 |
| TruSeqv1/noncoding    | 26.78 | 4.93 | 147 |
| TruSeqv2/noncoding    | 27.37 | 4.59 | 115 |
| Genome/noncoding      | 54.6  | 0.66 | 5   |
| Chip/noncoding        | 14    | 0.9  | 5   |
