# Supplementary material
Source: PubMed Central journal article supplement (PMC5316383)
Supplement: NIHMS802548-supplement-Table_S8.pdf [file NIHMS802548-supplement-Table_S8.pdf]

**Table S8.** Chip-ES-GS genotype concordance across 1929 variant positions

| Sample ID | ES capture kit | Chip genomic location (GRCh37) | Variant type | Chip call | Chip confidence | ES RD | ES GQ | GS RD | GS GQ | Chip call* | ES call | GS call | Concordance |         |       |
|-----------|----------------|--------------------------------|--------------|-----------|-----------------|-------|-------|-------|-------|------------|---------|---------|-------------|---------|-------|
|           |                |                                |              |           |                 |       |       |       |       |            |         |         | Chip-ES     | Chip-GS | ES-GS |
| 108971    | TruSeqV2       | 1:110201473                    | missense     | C/C       | 8.88E-16        | 239   | 99    | 45    | 99    | 0/0        | 0/0     | 0/0     | match       | match   | match |
| 115239    | TruSeqV2       | 1:110201473                    | missense     | C/C       | 8.88E-16        | 172   | 99    | 48    | 99    | 0/0        | 0/0     | 0/0     | match       | match   | match |
| 132306    | Agilent38MB    | 1:110201473                    | missense     | C/C       | 4.44E-16        | 98    | 99    | 38    | 99    | 0/0        | 0/0     | 0/0     | match       | match   | match |
| 163383    | TruSeqV2       | 1:110201473                    | missense     | C/C       | 2.22E-15        | 175   | 99    | 51    | 99    | 0/0        | 0/0     | 0/0     | match       | match   | match |
| 198564    | Agilent38MB    | 1:110201473                    | missense     | C/C       | 8.44E-15        | 205   | 99    | 44    | 99    | 0/0        | 0/0     | 0/0     | match       | match   | match |
| 108971    | TruSeqV2       | 1:110201521                    | missense     | T/T       | 2.22E-16        | 225   | 99    | 42    | 99    | 0/0        | 0/0     | 0/0     | match       | match   | match |
| 115239    | TruSeqV2       | 1:110201521                    | missense     | T/T       | 2.22E-16        | 155   | 99    | 46    | 99    | 0/0        | 0/0     | 0/0     | match       | match   | match |
| 132306    | Agilent38MB    | 1:110201521                    | missense     | T/T       | 4.44E-16        | 98    | 99    | 41    | 99    | 0/0        | 0/0     | 0/0     | match       | match   | match |
| 163383    | TruSeqV2       | 1:110201521                    | missense     | T/T       | 4.44E-16        | 206   | 99    | 37    | 96    | 0/0        | 0/0     | 0/0     | match       | match   | match |
| 198564    | Agilent38MB    | 1:110201521                    | missense     | T/T       | 1.11E-15        | 214   | 99    | 41    | 99    | 0/0        | 0/0     | 0/0     | match       | match   | match |
| 108971    | TruSeqV2       | 1:110201699                    | synon        | C/C       | 1.33E-14        | 276   | 99    | 37    | 99    | 1/1        | 1/1     | 1/1     | match       | match   | match |
| 115239    | TruSeqV2       | 1:110201699                    | synon        | C/C       | 8.05E-13        | 190   | 99    | 13    | 39    | 1/1        | 1/1     | 1/1     | match       | match   | match |
| 132306    | Agilent38MB    | 1:110201699                    | synon        | C/C       | 4.44E-16        | 309   | 99    | 22    | 66    | 1/1        | 1/1     | 1/1     | match       | match   | match |
| 163383    | TruSeqV2       | 1:110201699                    | synon        | C/C       | 4.44E-16        | 232   | 99    | 31    | 93    | 1/1        | 1/1     | 1/1     | match       | match   | match |
| 198564    | Agilent38MB    | 1:110201699                    | synon        | C/T       | 2.22E-15        | 718   | 99    | 35    | 99    | 0/1        | 0/1     | 0/1     | match       | match   | match |
| 108971    | TruSeqV2       | 1:110210780                    | splice       | G/G       | 4.44E-16        | 30    | 90    | 16    | 51    | 1/1        | 1/1     | 1/1     | match       | match   | match |
| 115239    | TruSeqV2       | 1:110210780                    | splice       | G/G       | 2.00E-15        | 12    | 36    | 9     | 27    | 1/1        | 1/1     | 1/1     | match       | match   | match |
| 132306    | Agilent38MB    | 1:110210780                    | splice       | G/G       | 8.88E-16        | 26    | 78    | 14    | 42    | 1/1        | 1/1     | 1/1     | match       | match   | match |
| 163383    | TruSeqV2       | 1:110210780                    | splice       | G/G       | 4.44E-16        | 16    | 48    | 11    | 33    | 1/1        | 1/1     | 1/1     | match       | match   | match |
| 198564    | Agilent38MB    | 1:110210780                    | splice       | G/G       | 1.78E-15        | 44    | 99    | 26    | 78    | 1/1        | 1/1     | 1/1     | match       | match   | match |
| 108971    | TruSeqV2       | 1:110211956                    | synon        | C/C       | 4.44E-16        | 187   | 99    | 28    | 75    | 0/0        | 0/0     | 0/0     | match       | match   | match |
| 115239    | TruSeqV2       | 1:110211956                    | synon        | C/T       | 1.55E-15        | 103   | 99    | 30    | 99    | 0/1        | 0/1     | 0/1     | match       | match   | match |
| 132306    | Agilent38MB    | 1:110211956                    | synon        | C/T       | 1.78E-15        | 425   | 99    | 31    | 99    | 0/1        | 0/1     | 0/1     | match       | match   | match |
| 163383    | TruSeqV2       | 1:110211956                    | synon        | C/C       | 2.22E-16        | 162   | 99    | 44    | 99    | 0/0        | 0/0     | 0/0     | match       | match   | match |
| 198564    | Agilent38MB    | 1:110211956                    | synon        | C/C       | 5.33E-15        | 930   | 99    | 39    | 99    | 0/0        | 0/0     | 0/0     | match       | match   | match |
| 108971    | TruSeqV2       | 1:110213949                    | missense     | T/T       | 1.55E-15        | 110   | 99    | 44    | 99    | 0/0        | 0/0     | 0/0     | match       | match   | match |
| 115239    | TruSeqV2       | 1:110213949                    | missense     | T/T       | 2.22E-16        | 83    | 99    | 34    | 90    | 0/0        | 0/0     | 0/0     | match       | match   | match |
| 132306    | Agilent38MB    | 1:110213949                    | missense     | T/T       | 8.88E-16        | 65    | 99    | 41    | 99    | 0/0        | 0/0     | 0/0     | match       | match   | match |
| 163383    | TruSeqV2       | 1:110213949                    | missense     | T/T       | 2.22E-16        | 84    | 99    | 37    | 97    | 0/0        | 0/0     | 0/0     | match       | match   | match |
| 198564    | Agilent38MB    | 1:110213949                    | missense     | T/T       | 2.22E-16        | 145   | 99    | 48    | 99    | 0/0        | 0/0     | 0/0     | match       | match   | match |
| 108971    | TruSeqV2       | 1:110213953                    | synon        | G/G       | 2.22E-16        | 112   | 99    | 46    | 99    | 0/0        | 0/0     | 0/0     | match       | match   | match |
| 115239    | TruSeqV2       | 1:110213953                    | synon        | G/G       | 2.22E-16        | 79    | 99    | 37    | 93    | 0/0        | 0/0     | 0/0     | match       | match   | match |
| 132306    | Agilent38MB    | 1:110213953                    | synon        | G/G       | 4.44E-16        | 70    | 99    | 39    | 99    | 0/0        | 0/0     | 0/0     | match       | match   | match |
| 163383    | TruSeqV2       | 1:110213953                    | synon        | G/G       | 2.22E-16        | 87    | 99    | 35    | 90    | 0/0        | 0/0     | 0/0     | match       | match   | match |

|        |             |             |           |     |          |     |    |    |    |     |     |     |       |       |       |
|--------|-------------|-------------|-----------|-----|----------|-----|----|----|----|-----|-----|-----|-------|-------|-------|
| 198564 | Agilent38MB | 1:110213953 | synon     | G/G | 4.44E-16 | 155 | 99 | 46 | 99 | 0/0 | 0/0 | 0/0 | match | match | match |
| 108971 | TruSeqV2    | 1:110213991 | missense  | T/T | 2.00E-15 | 107 | 99 | 39 | 99 | 0/0 | 0/0 | 0/0 | match | match | match |
| 115239 | TruSeqV2    | 1:110213991 | missense  | T/T | 2.22E-16 | 79  | 99 | 34 | 90 | 0/0 | 0/0 | 0/0 | match | match | match |
| 132306 | Agilent38MB | 1:110213991 | missense  | T/T | 4.44E-16 | 99  | 99 | 37 | 99 | 0/0 | 0/0 | 0/0 | match | match | match |
| 163383 | TruSeqV2    | 1:110213991 | missense  | T/T | 2.22E-16 | 87  | 99 | 31 | 84 | 0/0 | 0/0 | 0/0 | match | match | match |
| 198564 | Agilent38MB | 1:110213991 | missense  | T/T | 2.22E-16 | 166 | 99 | 42 | 99 | 0/0 | 0/0 | 0/0 | match | match | match |
| 108971 | TruSeqV2    | 1:110231592 | intronic  | T/T | 3.55E-15 | 48  | 99 | 17 | 33 | 0/0 | 0/0 | 0/0 | match | match | match |
| 115239 | TruSeqV2    | 1:110231592 | intronic  | C/T | 4.88E-15 | 40  | 99 | 31 | 99 | 0/1 | 0/1 | 0/1 | match | match | match |
| 132306 | Agilent38MB | 1:110231592 | intronic  | T/T | 1.32E-09 | 18  | 42 | 23 | 66 | 0/0 | 0/0 | 0/0 | match | match | match |
| 108971 | TruSeqV2    | 1:110233138 | missense  | G/G | 9.80E-07 | 129 | 99 | 16 | 45 | 0/0 | 0/0 | 0/0 | match | match | match |
| 115239 | TruSeqV2    | 1:110233138 | missense  | C/G | 5.55E-15 | 210 | 99 | 22 | 99 | 0/1 | 0/1 | 0/1 | match | match | match |
| 132306 | Agilent38MB | 1:110233138 | missense  | G/G | 2.26E-11 | 151 | 84 | 12 | 24 | 0/0 | 0/0 | 0/0 | match | match | match |
| 132306 | Agilent38MB | 1:110254411 | promoter  | C/C | 2.00E-15 | 2   | 6  | 37 | 93 | 0/0 | 0/0 | 0/0 | match | match | match |
|        |             |             | missense  |     |          |     |    |    |    |     |     |     |       |       |       |
|        |             |             | alternate |     |          |     |    |    |    |     |     |     |       |       |       |
| 108971 | TruSeqV2    | 1:110256075 | exon      | A/G | 2.99E-07 | 94  | 99 | 34 | 99 | 0/1 | 0/1 | 0/1 | match | match | match |
|        |             |             | missense  |     |          |     |    |    |    |     |     |     |       |       |       |
|        |             |             | alternate |     |          |     |    |    |    |     |     |     |       |       |       |
| 115239 | TruSeqV2    | 1:110256075 | exon      | A/A | 7.99E-15 | 88  | 90 | 21 | 57 | 0/0 | 0/0 | 0/0 | match | match | match |
|        |             |             | missense  |     |          |     |    |    |    |     |     |     |       |       |       |
|        |             |             | alternate |     |          |     |    |    |    |     |     |     |       |       |       |
| 132306 | Agilent38MB | 1:110256075 | exon      | A/A | 2.22E-16 | 114 | 99 | 27 | 66 | 0/0 | 0/0 | 0/0 | match | match | match |
|        |             |             | missense  |     |          |     |    |    |    |     |     |     |       |       |       |
|        |             |             | alternate |     |          |     |    |    |    |     |     |     |       |       |       |
| 163383 | TruSeqV2    | 1:110256075 | exon      | A/A | 6.66E-16 | 78  | 99 | 26 | 72 | 0/0 | 0/0 | 0/0 | match | match | match |
|        |             |             | missense  |     |          |     |    |    |    |     |     |     |       |       |       |
|        |             |             | alternate |     |          |     |    |    |    |     |     |     |       |       |       |
| 198564 | Agilent38MB | 1:110256075 | exon      | A/G | 7.43E-09 | 230 | 99 | 31 | 99 | 0/1 | 0/1 | 0/1 | match | match | match |
| 108971 | TruSeqV2    | 1:110257590 | synon     | C/T | 8.22E-15 | 133 | 99 | 34 | 99 | 0/1 | 0/1 | 0/1 | match | match | match |
| 115239 | TruSeqV2    | 1:110257590 | synon     | T/T | 6.66E-16 | 92  | 99 | 33 | 75 | 0/0 | 0/0 | 0/0 | match | match | match |
| 132306 | Agilent38MB | 1:110257590 | synon     | C/T | 8.44E-15 | 60  | 99 | 36 | 99 | 0/1 | 0/1 | 0/1 | match | match | match |
| 163383 | TruSeqV2    | 1:110257590 | synon     | T/T | 6.66E-16 | 124 | 99 | 38 | 99 | 0/0 | 0/0 | 0/0 | match | match | match |
| 198564 | Agilent38MB | 1:110257590 | synon     | T/T | 1.11E-15 | 117 | 99 | 54 | 99 | 0/0 | 0/0 | 0/0 | match | match | match |
| 108971 | TruSeqV2    | 1:110260510 | 3'UTR     | G/G | 2.22E-16 | 193 | 99 | 39 | 99 | 0/0 | 0/0 | 0/0 | match | match | match |
| 115239 | TruSeqV2    | 1:110260510 | 3'UTR     | G/G | 6.66E-16 | 137 | 99 | 37 | 99 | 0/0 | 0/0 | 0/0 | match | match | match |
| 163383 | TruSeqV2    | 1:110260510 | 3'UTR     | G/G | 2.22E-16 | 176 | 99 | 44 | 99 | 0/0 | 0/0 | 0/0 | match | match | match |
| 108971 | TruSeqV2    | 1:110260742 | 3'UTR     | C/T | 2.00E-15 | 33  | 99 | 35 | 99 | 0/1 | 0/1 | 0/1 | match | match | match |
| 115239 | TruSeqV2    | 1:110260742 | 3'UTR     | T/T | 7.77E-15 | 14  | 39 | 35 | 99 | 0/0 | 0/0 | 0/0 | match | match | match |

|        |             |             |          |       |          |     |    |    |    |     |     |     |       |       |       |
|--------|-------------|-------------|----------|-------|----------|-----|----|----|----|-----|-----|-----|-------|-------|-------|
| 163383 | TruSeqV2    | 1:110260742 | 3'UTR    | T/T   | 9.77E-15 | 26  | 75 | 36 | 96 | 0/0 | 0/0 | 0/0 | match | match | match |
| 198564 | Agilent38MB | 1:110260742 | 3'UTR    | T/T   | 3.06E-13 | 1   | 3  | 41 | 99 | 0/0 | 0/0 | 0/0 | match | match | match |
| 108971 | TruSeqV2    | 1:110279602 | 3'UTR    | T/G   | 1.42E-14 | 180 | 99 | 44 | 99 | 0/1 | 0/1 | 0/1 | match | match | match |
| 115239 | TruSeqV2    | 1:110279602 | 3'UTR    | T/T   | 4.44E-16 | 152 | 99 | 38 | 99 | 0/0 | 0/0 | 0/0 | match | match | match |
| 132306 | Agilent38MB | 1:110279602 | 3'UTR    | T/G   | 7.55E-15 | 10  | 96 | 39 | 99 | 0/1 | 0/1 | 0/1 | match | match | match |
| 163383 | TruSeqV2    | 1:110279602 | 3'UTR    | T/T   | 6.66E-16 | 184 | 99 | 36 | 93 | 0/0 | 0/0 | 0/0 | match | match | match |
| 198564 | Agilent38MB | 1:110279602 | 3'UTR    | T/T   | 1.33E-15 | 17  | 51 | 57 | 99 | 0/0 | 0/0 | 0/0 | match | match | match |
| 108971 | TruSeqV2    | 1:110279663 | 3'UTR    | C/C   | 1.78E-15 | 173 | 99 | 31 | 90 | 0/0 | 0/0 | 0/0 | match | match | match |
| 115239 | TruSeqV2    | 1:110279663 | 3'UTR    | C/C   | 2.22E-15 | 127 | 99 | 34 | 87 | 0/0 | 0/0 | 0/0 | match | match | match |
| 132306 | Agilent38MB | 1:110279663 | 3'UTR    | C/C   | 4.44E-16 | 60  | 99 | 30 | 81 | 0/0 | 0/0 | 0/0 | match | match | match |
| 163383 | TruSeqV2    | 1:110279663 | 3'UTR    | C/C   | 1.78E-15 | 166 | 99 | 28 | 69 | 0/0 | 0/0 | 0/0 | match | match | match |
| 198564 | Agilent38MB | 1:110279663 | 3'UTR    | C/C   | 4.44E-16 | 66  | 99 | 47 | 99 | 0/0 | 0/0 | 0/0 | match | match | match |
| 108971 | TruSeqV2    | 1:110279701 | missense | C/C   | 1.33E-15 | 158 | 99 | 31 | 81 | 0/0 | 0/0 | 0/0 | match | match | match |
| 115239 | TruSeqV2    | 1:110279701 | missense | T/T   | 1.26E-11 | 92  | 99 | 32 | 31 | 1/1 | 1/1 | 1/1 | match | match | match |
| 132306 | Agilent38MB | 1:110279701 | missense | T/C   | 1.11E-15 | 132 | 99 | 31 | 99 | 0/1 | 0/1 | 0/1 | match | match | match |
| 163383 | TruSeqV2    | 1:110279701 | missense | T/C   | 5.11E-15 | 133 | 99 | 32 | 99 | 0/1 | 0/1 | 0/1 | match | match | match |
| 198564 | Agilent38MB | 1:110279701 | missense | T/C   | 9.77E-15 | 220 | 99 | 44 | 99 | 0/1 | 0/1 | 0/1 | match | match | match |
| 108971 | TruSeqV2    | 1:110280254 | intronic | -/AGG | 4.53E-14 | 104 | 99 | 51 | 99 | 0/1 | 0/1 | 0/1 | match | match | match |
| 132306 | Agilent38MB | 1:110280254 | intronic | -/AGG | 4.22E-10 | 104 | 99 | 51 | 99 | 0/1 | 0/1 | 0/1 | match | match | match |
| 108971 | TruSeqV2    | 1:110280362 | missense | C/C   | 1.55E-15 | 113 | 99 | 34 | 78 | 0/0 | 0/0 | 0/0 | match | match | match |
| 115239 | TruSeqV2    | 1:110280362 | missense | C/C   | 6.44E-15 | 76  | 99 | 36 | 99 | 0/0 | 0/0 | 0/0 | match | match | match |
| 132306 | Agilent38MB | 1:110280362 | missense | C/C   | 9.55E-15 | 38  | 78 | 36 | 87 | 0/0 | 0/0 | 0/0 | match | match | match |
| 163383 | TruSeqV2    | 1:110280362 | missense | C/C   | 3.77E-15 | 83  | 99 | 31 | 87 | 0/0 | 0/0 | 0/0 | match | match | match |
| 198564 | Agilent38MB | 1:110280362 | missense | C/C   | 4.00E-15 | 62  | 99 | 33 | 93 | 0/0 | 0/0 | 0/0 | match | match | match |
| 108971 | TruSeqV2    | 1:110282891 | missense | T/T   | 2.22E-16 | 8   | 24 | 12 | 30 | 0/0 | 0/0 | 0/0 | match | match | match |
| 115239 | TruSeqV2    | 1:110282891 | missense | T/T   | 2.22E-16 | 3   | 9  | 8  | 24 | 0/0 | 0/0 | 0/0 | match | match | match |
| 132306 | Agilent38MB | 1:110282891 | missense | T/T   | 1.11E-15 | 100 | 99 | 5  | 12 | 0/0 | 0/0 | 0/0 | match | match | match |
| 163383 | TruSeqV2    | 1:110282891 | missense | T/T   | 2.22E-16 | 3   | 6  | 10 | 27 | 0/0 | 0/0 | 0/0 | match | match | match |
| 198564 | Agilent38MB | 1:110282891 | missense | T/T   | 8.88E-16 | 151 | 99 | 33 | 81 | 0/0 | 0/0 | 0/0 | match | match | match |
| 115239 | TruSeqV2    | 1:110283069 | 5'UTR    | C/C   | 1.12E-13 | 1   | 3  | 5  | 12 | 0/0 | 0/0 | 0/0 | match | match | match |
| 132306 | Agilent38MB | 1:110283069 | 5'UTR    | C/C   | 3.53E-14 | 4   | 6  | 13 | 36 | 0/0 | 0/0 | 0/0 | match | match | match |
| 198564 | Agilent38MB | 1:110283069 | 5'UTR    | C/C   | 3.38E-13 | 5   | 9  | 31 | 81 | 0/0 | 0/0 | 0/0 | match | match | match |
| 108971 | TruSeqV2    | 1:113454571 | 3'UTR    | A/A   | 6.66E-16 | 163 | 99 | 37 | 96 | 0/0 | 0/0 | 0/0 | match | match | match |
| 115239 | TruSeqV2    | 1:113454571 | 3'UTR    | A/A   | 1.11E-15 | 123 | 99 | 40 | 90 | 0/0 | 0/0 | 0/0 | match | match | match |
| 163383 | TruSeqV2    | 1:113454571 | 3'UTR    | G/A   | 1.55E-15 | 135 | 99 | 40 | 99 | 0/1 | 0/1 | 0/1 | match | match | match |
| 108971 | TruSeqV2    | 1:113454637 | 3'UTR    | C/C   | 2.22E-16 | 177 | 99 | 43 | 99 | 0/0 | 0/0 | 0/0 | match | match | match |
| 115239 | TruSeqV2    | 1:113454637 | 3'UTR    | C/C   | 2.22E-16 | 140 | 99 | 29 | 69 | 0/0 | 0/0 | 0/0 | match | match | match |
| 163383 | TruSeqV2    | 1:113454637 | 3'UTR    | C/C   | 2.22E-16 | 161 | 99 | 35 | 87 | 0/0 | 0/0 | 0/0 | match | match | match |

|        |             |             |          |     |          |     |    |    |    |     |     |     |       |       |       |
|--------|-------------|-------------|----------|-----|----------|-----|----|----|----|-----|-----|-----|-------|-------|-------|
| 198564 | Agilent38MB | 1:113454637 | 3'UTR    | C/C | 2.22E-16 | 3   | 6  | 31 | 81 | 0/0 | 0/0 | 0/0 | match | match | match |
| 108971 | TruSeqV2    | 1:113455099 | 3'UTR    | G/A | 1.55E-15 | 73  | 99 | 48 | 99 | 0/1 | 0/1 | 0/1 | match | match | match |
| 115239 | TruSeqV2    | 1:113455099 | 3'UTR    | A/A | 1.33E-15 | 37  | 99 | 49 | 99 | 1/1 | 1/1 | 1/1 | match | match | match |
| 163383 | TruSeqV2    | 1:113455099 | 3'UTR    | G/A | 4.66E-15 | 54  | 99 | 47 | 99 | 0/1 | 0/1 | 0/1 | match | match | match |
| 108971 | TruSeqV2    | 1:113456368 | 3'UTR    | A/A | 1.91E-14 | 120 | 99 | 58 | 99 | 0/0 | 0/0 | 0/0 | match | match | match |
| 115239 | TruSeqV2    | 1:113456368 | 3'UTR    | A/A | 2.73E-14 | 104 | 99 | 52 | 99 | 0/0 | 0/0 | 0/0 | match | match | match |
| 132306 | Agilent38MB | 1:113456368 | 3'UTR    | A/A | 4.44E-16 | 10  | 27 | 39 | 99 | 0/0 | 0/0 | 0/0 | match | match | match |
| 163383 | TruSeqV2    | 1:113456368 | 3'UTR    | A/A | 3.11E-15 | 112 | 99 | 44 | 99 | 0/0 | 0/0 | 0/0 | match | match | match |
| 198564 | Agilent38MB | 1:113456368 | 3'UTR    | A/A | 1.33E-15 | 8   | 21 | 54 | 99 | 0/0 | 0/0 | 0/0 | match | match | match |
| 108971 | TruSeqV2    | 1:113456546 | missense | T/A | 4.66E-15 | 292 | 99 | 37 | 99 | 0/1 | 0/1 | 0/1 | match | match | match |
| 115239 | TruSeqV2    | 1:113456546 | missense | T/T | 2.00E-15 | 218 | 99 | 41 | 99 | 1/1 | 1/1 | 1/1 | match | match | match |
| 132306 | Agilent38MB | 1:113456546 | missense | A/A | 1.93E-14 | 304 | 99 | 39 | 99 | 0/0 | 0/0 | 0/0 | match | match | match |
| 163383 | TruSeqV2    | 1:113456546 | missense | T/A | 5.77E-15 | 240 | 99 | 38 | 99 | 0/1 | 0/1 | 0/1 | match | match | match |
| 198564 | Agilent38MB | 1:113456546 | missense | T/T | 8.66E-15 | 585 | 99 | 47 | 99 | 1/1 | 1/1 | 1/1 | match | match | match |
| 132306 | Agilent38MB | 1:113458216 | intronic | G/G | 2.22E-15 | 2   | 5  | 40 | 99 | 0/0 | 0/0 | 0/0 | match | match | match |
| 108971 | TruSeqV2    | 1:146658711 | missense | G/G | 2.22E-16 | 121 | 99 | 54 | 99 | 0/0 | 0/0 | 0/0 | match | match | match |
| 115239 | TruSeqV2    | 1:146658711 | missense | G/G | 2.22E-16 | 107 | 99 | 38 | 99 | 0/0 | 0/0 | 0/0 | match | match | match |
| 132306 | Agilent38MB | 1:146658711 | missense | G/G | 2.22E-16 | 54  | 99 | 39 | 93 | 0/0 | 0/0 | 0/0 | match | match | match |
| 163383 | TruSeqV2    | 1:146658711 | missense | G/G | 2.22E-16 | 107 | 99 | 36 | 99 | 0/0 | 0/0 | 0/0 | match | match | match |
| 198564 | Agilent38MB | 1:146658711 | missense | G/G | 2.22E-16 | 130 | 99 | 38 | 99 | 0/0 | 0/0 | 0/0 | match | match | match |
| 108971 | TruSeqV2    | 1:146672866 | missense | A/A | 3.33E-15 | 182 | 99 | 29 | 69 | 0/0 | 0/0 | 0/0 | match | match | match |
| 115239 | TruSeqV2    | 1:146672866 | missense | A/A | 4.44E-16 | 122 | 99 | 35 | 87 | 0/0 | 0/0 | 0/0 | match | match | match |
| 132306 | Agilent38MB | 1:146672866 | missense | A/A | 2.22E-16 | 94  | 99 | 33 | 77 | 0/0 | 0/0 | 0/0 | match | match | match |
| 163383 | TruSeqV2    | 1:146672866 | missense | A/A | 4.44E-16 | 152 | 99 | 29 | 81 | 0/0 | 0/0 | 0/0 | match | match | match |
| 198564 | Agilent38MB | 1:146672866 | missense | A/A | 1.37E-11 | 116 | 99 | 33 | 87 | 0/0 | 0/0 | 0/0 | match | match | match |
| 108971 | TruSeqV2    | 1:146672906 | synon    | T/T | 6.60E-12 | 109 | 99 | 38 | 99 | 1/1 | 1/1 | 1/1 | match | match | match |
| 115239 | TruSeqV2    | 1:146672906 | synon    | C/C | 1.20E-13 | 82  | 99 | 37 | 76 | 0/0 | 0/0 | 0/0 | match | match | match |
| 132306 | Agilent38MB | 1:146672906 | synon    | T/T | 2.34E-11 | 142 | 99 | 40 | 99 | 1/1 | 1/1 | 1/1 | match | match | match |
| 163383 | TruSeqV2    | 1:146672906 | synon    | T/T | 9.08E-11 | 108 | 99 | 36 | 99 | 1/1 | 1/1 | 1/1 | match | match | match |
| 198564 | Agilent38MB | 1:146672906 | synon    | T/T | 4.06E-12 | 205 | 99 | 35 | 99 | 1/1 | 1/1 | 1/1 | match | match | match |
| 108971 | TruSeqV2    | 1:146676364 | intronic | A/A | 4.44E-16 | 533 | 99 | 46 | 99 | 0/0 | 0/0 | 0/0 | match | match | match |
| 115239 | TruSeqV2    | 1:146676364 | intronic | A/A | 6.66E-16 | 286 | 99 | 48 | 99 | 0/0 | 0/0 | 0/0 | match | match | match |
| 132306 | Agilent38MB | 1:146676364 | intronic | A/A | 6.66E-16 | 112 | 99 | 44 | 99 | 0/0 | 0/0 | 0/0 | match | match | match |
| 163383 | TruSeqV2    | 1:146676364 | intronic | A/A | 4.44E-16 | 453 | 99 | 47 | 99 | 0/0 | 0/0 | 0/0 | match | match | match |
| 198564 | Agilent38MB | 1:146676364 | intronic | A/A | 4.66E-15 | 199 | 99 | 62 | 99 | 0/0 | 0/0 | 0/0 | match | match | match |
| 108971 | TruSeqV2    | 1:146676384 | intronic | G/G | 2.22E-16 | 528 | 99 | 46 | 99 | 0/0 | 0/0 | 0/0 | match | match | match |
| 115239 | TruSeqV2    | 1:146676384 | intronic | G/G | 7.99E-15 | 301 | 99 | 42 | 99 | 0/0 | 0/0 | 0/0 | match | match | match |
| 132306 | Agilent38MB | 1:146676384 | intronic | G/G | 2.22E-16 | 111 | 99 | 46 | 99 | 0/0 | 0/0 | 0/0 | match | match | match |

|        |             |             |          |     |          |     |    |    |    |     |     |     |       |       |       |
|--------|-------------|-------------|----------|-----|----------|-----|----|----|----|-----|-----|-----|-------|-------|-------|
| 163383 | TruSeqV2    | 1:146676384 | intronic | G/G | 2.22E-16 | 417 | 99 | 46 | 99 | 0/0 | 0/0 | 0/0 | match | match | match |
| 198564 | Agilent38MB | 1:146676384 | intronic | G/G | 2.22E-16 | 159 | 99 | 54 | 99 | 0/0 | 0/0 | 0/0 | match | match | match |
| 108971 | TruSeqV2    | 1:146680471 | fs       | A/A | 2.22E-16 | 55  | 99 | 39 | 99 | 0/0 | 0/0 | 0/0 | match | match | match |
| 115239 | TruSeqV2    | 1:146680471 | fs       | A/A | 2.22E-16 | 55  | 99 | 39 | 99 | 0/0 | 0/0 | 0/0 | match | match | match |
| 132306 | Agilent38MB | 1:146680471 | fs       | A/A | 2.22E-16 | 55  | 99 | 39 | 99 | 0/0 | 0/0 | 0/0 | match | match | match |
| 163383 | TruSeqV2    | 1:146680471 | fs       | A/A | 2.22E-16 | 55  | 99 | 39 | 99 | 0/0 | 0/0 | 0/0 | match | match | match |
| 198564 | Agilent38MB | 1:146680471 | fs       | A/A | 3.55E-15 | 55  | 99 | 39 | 99 | 0/0 | 0/0 | 0/0 | match | match | match |
| 108971 | TruSeqV2    | 1:146683983 | fs       | -/- | 2.22E-16 | 181 | 99 | 40 | 99 | 0/0 | 0/0 | 0/0 | match | match | match |
| 115239 | TruSeqV2    | 1:146683983 | fs       | -/- | 2.22E-16 | 181 | 99 | 40 | 99 | 0/0 | 0/0 | 0/0 | match | match | match |
| 132306 | Agilent38MB | 1:146683983 | fs       | -/- | 6.66E-16 | 181 | 99 | 40 | 99 | 0/0 | 0/0 | 0/0 | match | match | match |
| 163383 | TruSeqV2    | 1:146683983 | fs       | -/- | 4.44E-16 | 181 | 99 | 40 | 99 | 0/0 | 0/0 | 0/0 | match | match | match |
| 198564 | Agilent38MB | 1:146683983 | fs       | -/- | 2.22E-16 | 181 | 99 | 40 | 99 | 0/0 | 0/0 | 0/0 | match | match | match |
| 108971 | TruSeqV2    | 1:150795775 | missense | C/C | 2.22E-16 | 184 | 99 | 32 | 87 | 0/0 | 0/0 | 0/0 | match | match | match |
| 115239 | TruSeqV2    | 1:150795775 | missense | C/C | 4.44E-16 | 114 | 99 | 34 | 84 | 0/0 | 0/0 | 0/0 | match | match | match |
| 132306 | Agilent38MB | 1:150795775 | missense | C/C | 2.22E-16 | 264 | 99 | 31 | 81 | 0/0 | 0/0 | 0/0 | match | match | match |
| 163383 | TruSeqV2    | 1:150795775 | missense | C/C | 4.44E-16 | 130 | 99 | 32 | 78 | 0/0 | 0/0 | 0/0 | match | match | match |
| 198564 | Agilent38MB | 1:150795775 | missense | C/C | 2.22E-16 | 476 | 99 | 34 | 99 | 0/0 | 0/0 | 0/0 | match | match | match |
| 108971 | TruSeqV2    | 1:150795840 | intronic | C/C | 2.22E-16 | 83  | 99 | 32 | 90 | 0/0 | 0/0 | 0/0 | match | match | match |
| 115239 | TruSeqV2    | 1:150795840 | intronic | C/C | 4.44E-16 | 61  | 99 | 31 | 87 | 0/0 | 0/0 | 0/0 | match | match | match |
| 132306 | Agilent38MB | 1:150795840 | intronic | C/C | 2.22E-16 | 121 | 99 | 30 | 84 | 0/0 | 0/0 | 0/0 | match | match | match |
| 163383 | TruSeqV2    | 1:150795840 | intronic | C/C | 4.44E-16 | 61  | 99 | 33 | 87 | 0/0 | 0/0 | 0/0 | match | match | match |
| 198564 | Agilent38MB | 1:150795840 | intronic | C/C | 5.33E-15 | 278 | 99 | 37 | 99 | 0/0 | 0/0 | 0/0 | match | match | match |
| 108971 | TruSeqV2    | 1:150808889 | synon    | C/C | 1.11E-15 | 120 | 99 | 28 | 69 | 0/0 | 0/0 | 0/0 | match | match | match |
| 115239 | TruSeqV2    | 1:150808889 | synon    | G/C | 4.44E-16 | 84  | 99 | 33 | 99 | 0/1 | 0/1 | 0/1 | match | match | match |
| 132306 | Agilent38MB | 1:150808889 | synon    | G/G | 1.11E-15 | 73  | 99 | 29 | 87 | 1/1 | 1/1 | 1/1 | match | match | match |
| 163383 | TruSeqV2    | 1:150808889 | synon    | C/C | 1.11E-15 | 121 | 99 | 27 | 72 | 0/0 | 0/0 | 0/0 | match | match | match |
| 198564 | Agilent38MB | 1:150808889 | synon    | G/C | 8.88E-16 | 164 | 99 | 23 | 99 | 0/1 | 0/1 | 0/1 | match | match | match |
| 108971 | TruSeqV2    | 1:150812049 | synon    | G/G | 1.58E-14 | 254 | 99 | 40 | 99 | 0/0 | 0/0 | 0/0 | match | match | match |
| 115239 | TruSeqV2    | 1:150812049 | synon    | G/G | 2.22E-16 | 156 | 99 | 41 | 99 | 0/0 | 0/0 | 0/0 | match | match | match |
| 132306 | Agilent38MB | 1:150812049 | synon    | G/G | 2.00E-15 | 91  | 99 | 34 | 99 | 0/0 | 0/0 | 0/0 | match | match | match |
| 163383 | TruSeqV2    | 1:150812049 | synon    | G/G | 6.66E-16 | 172 | 99 | 27 | 69 | 0/0 | 0/0 | 0/0 | match | match | match |
| 198564 | Agilent38MB | 1:150812049 | synon    | G/G | 2.22E-16 | 212 | 99 | 30 | 75 | 0/0 | 0/0 | 0/0 | match | match | match |
| 108971 | TruSeqV2    | 1:150814902 | synon    | G/G | 2.22E-16 | 215 | 99 | 43 | 99 | 0/0 | 0/0 | 0/0 | match | match | match |
| 115239 | TruSeqV2    | 1:150814902 | synon    | G/G | 4.44E-16 | 147 | 99 | 40 | 99 | 0/0 | 0/0 | 0/0 | match | match | match |
| 132306 | Agilent38MB | 1:150814902 | synon    | G/G | 2.22E-16 | 177 | 99 | 38 | 99 | 0/0 | 0/0 | 0/0 | match | match | match |
| 163383 | TruSeqV2    | 1:150814902 | synon    | G/G | 2.22E-16 | 159 | 99 | 46 | 99 | 0/0 | 0/0 | 0/0 | match | match | match |
| 198564 | Agilent38MB | 1:150814902 | synon    | G/G | 2.22E-16 | 331 | 99 | 57 | 99 | 0/0 | 0/0 | 0/0 | match | match | match |
| 108971 | TruSeqV2    | 1:150814923 | synon    | A/A | 8.35E-14 | 205 | 99 | 36 | 90 | 0/0 | 0/0 | 0/0 | match | match | match |

|        |             |             |            |     |          |     |    |    |    |     |     |     |       |       |       |
|--------|-------------|-------------|------------|-----|----------|-----|----|----|----|-----|-----|-----|-------|-------|-------|
| 115239 | TruSeqV2    | 1:150814923 | synon      | A/A | 6.89E-12 | 139 | 99 | 34 | 87 | 0/0 | 0/0 | 0/0 | match | match | match |
| 132306 | Agilent38MB | 1:150814923 | synon      | A/A | 6.13E-14 | 157 | 99 | 36 | 96 | 0/0 | 0/0 | 0/0 | match | match | match |
| 163383 | TruSeqV2    | 1:150814923 | synon      | A/A | 5.75E-14 | 158 | 99 | 42 | 99 | 0/0 | 0/0 | 0/0 | match | match | match |
| 198564 | Agilent38MB | 1:150814923 | synon      | A/A | 3.40E-11 | 318 | 99 | 56 | 99 | 0/0 | 0/0 | 0/0 | match | match | match |
| 108971 | TruSeqV2    | 1:150849103 | 5'UTR      | C/C | 2.22E-16 | 6   | 15 | 25 | 69 | 0/0 | 0/0 | 0/0 | match | match | match |
| 115239 | TruSeqV2    | 1:150849103 | 5'UTR      | C/C | 6.66E-16 | 4   | 12 | 2  | 6  | 0/0 | 0/0 | 0/0 | match | match | match |
| 163383 | TruSeqV2    | 1:150849103 | 5'UTR      | C/C | 1.78E-15 | 10  | 30 | 24 | 60 | 0/0 | 0/0 | 0/0 | match | match | match |
| 198564 | Agilent38MB | 1:150849103 | 5'UTR      | C/C | 4.44E-16 | 2   | 6  | 26 | 63 | 0/0 | 0/0 | 0/0 | match | match | match |
| 108971 | TruSeqV2    | 1:161192511 | intronic   | G/C | 6.66E-16 | 7   | 57 | 28 | 99 | 0/1 | 0/1 | 0/1 | match | match | match |
| 115239 | TruSeqV2    | 1:161192511 | intronic   | C/C | 4.44E-16 | 3   | 9  | 41 | 99 | 0/0 | 0/0 | 0/0 | match | match | match |
| 132306 | Agilent38MB | 1:161192511 | intronic   | C/C | 1.11E-15 | 2   | 6  | 31 | 90 | 0/0 | 0/0 | 0/0 | match | match | match |
| 163383 | TruSeqV2    | 1:161192511 | intronic   | C/C | 2.22E-16 | 12  | 30 | 26 | 78 | 0/0 | 0/0 | 0/0 | match | match | match |
| 198564 | Agilent38MB | 1:161192511 | intronic   | G/C | 6.66E-16 | 4   | 71 | 37 | 99 | 0/1 | 0/1 | 0/1 | match | match | match |
| 163383 | TruSeqV2    | 1:161212453 | intergenic | C/C | 4.44E-16 | 1   | 3  | 41 | 99 | 0/0 | 0/0 | 0/0 | match | match | match |
| 198564 | Agilent38MB | 1:161212569 | intergenic | G/G | 2.66E-15 | 4   | 12 | 51 | 99 | 0/0 | 0/0 | 0/0 | match | match | match |
| 132306 | Agilent38MB | 1:161212743 | intergenic | C/C | 4.44E-16 | 1   | 3  | 26 | 66 | 0/0 | 0/0 | 0/0 | match | match | match |
| 198564 | Agilent38MB | 1:161212743 | intergenic | C/C | 2.89E-15 | 1   | 3  | 28 | 60 | 0/0 | 0/0 | 0/0 | match | match | match |
| 132306 | Agilent38MB | 1:161212956 | intergenic | A/A | 4.44E-16 | 2   | 5  | 39 | 96 | 0/0 | 0/0 | 0/0 | match | match | match |
| 108971 | TruSeqV2    | 1:171061893 | missense   | G/G | 4.44E-16 | 83  | 99 | 31 | 78 | 0/0 | 0/0 | 0/0 | match | match | match |
| 115239 | TruSeqV2    | 1:171061893 | missense   | G/G | 6.66E-16 | 55  | 99 | 31 | 93 | 0/0 | 0/0 | 0/0 | match | match | match |
| 132306 | Agilent38MB | 1:171061893 | missense   | G/G | 2.22E-16 | 84  | 99 | 36 | 99 | 0/0 | 0/0 | 0/0 | match | match | match |
| 163383 | TruSeqV2    | 1:171061893 | missense   | G/G | 4.44E-16 | 57  | 99 | 44 | 99 | 0/0 | 0/0 | 0/0 | match | match | match |
| 198564 | Agilent38MB | 1:171061893 | missense   | G/G | 4.44E-16 | 110 | 99 | 35 | 93 | 0/0 | 0/0 | 0/0 | match | match | match |
| 108971 | TruSeqV2    | 1:171072947 | missense   | G/G | 2.22E-16 | 64  | 99 | 32 | 78 | 0/0 | 0/0 | 0/0 | match | match | match |
| 115239 | TruSeqV2    | 1:171072947 | missense   | G/G | 4.44E-16 | 46  | 99 | 49 | 99 | 0/0 | 0/0 | 0/0 | match | match | match |
| 132306 | Agilent38MB | 1:171072947 | missense   | G/G | 6.66E-16 | 29  | 66 | 41 | 99 | 0/0 | 0/0 | 0/0 | match | match | match |
| 163383 | TruSeqV2    | 1:171072947 | missense   | G/G | 4.44E-16 | 57  | 99 | 38 | 99 | 0/0 | 0/0 | 0/0 | match | match | match |
| 198564 | Agilent38MB | 1:171072947 | missense   | G/G | 4.44E-16 | 44  | 99 | 46 | 99 | 0/0 | 0/0 | 0/0 | match | match | match |
| 108971 | TruSeqV2    | 1:171072975 | missense   | A/A | 4.44E-16 | 76  | 99 | 42 | 99 | 0/0 | 0/0 | 0/0 | match | match | match |
| 115239 | TruSeqV2    | 1:171072975 | missense   | A/A | 1.78E-15 | 52  | 99 | 51 | 99 | 0/0 | 0/0 | 0/0 | match | match | match |
| 132306 | Agilent38MB | 1:171072975 | missense   | A/A | 2.22E-16 | 31  | 75 | 37 | 96 | 0/0 | 0/0 | 0/0 | match | match | match |
| 163383 | TruSeqV2    | 1:171072975 | missense   | A/A | 6.66E-16 | 67  | 99 | 43 | 99 | 0/0 | 0/0 | 0/0 | match | match | match |
| 198564 | Agilent38MB | 1:171072975 | missense   | A/A | 1.11E-15 | 52  | 99 | 48 | 99 | 0/0 | 0/0 | 0/0 | match | match | match |
| 108971 | TruSeqV2    | 1:171072991 | missense   | G/G | 2.22E-16 | 85  | 99 | 45 | 99 | 0/0 | 0/0 | 0/0 | match | match | match |
| 115239 | TruSeqV2    | 1:171072991 | missense   | G/G | 4.44E-16 | 51  | 99 | 48 | 99 | 0/0 | 0/0 | 0/0 | match | match | match |
| 132306 | Agilent38MB | 1:171072991 | missense   | G/G | 4.00E-15 | 36  | 96 | 37 | 95 | 0/0 | 0/0 | 0/0 | match | match | match |
| 163383 | TruSeqV2    | 1:171072991 | missense   | G/G | 4.44E-16 | 82  | 99 | 50 | 99 | 0/0 | 0/0 | 0/0 | match | match | match |
| 198564 | Agilent38MB | 1:171072991 | missense   | G/G | 2.22E-16 | 59  | 99 | 47 | 99 | 0/0 | 0/0 | 0/0 | match | match | match |

|        |             |             |          |     |          |     |    |    |    |     |     |     |       |       |       |
|--------|-------------|-------------|----------|-----|----------|-----|----|----|----|-----|-----|-----|-------|-------|-------|
| 108971 | TruSeqV2    | 1:171073038 | missense | T/T | 2.22E-16 | 85  | 99 | 57 | 99 | 0/0 | 0/0 | 0/0 | match | match | match |
| 115239 | TruSeqV2    | 1:171073038 | missense | T/T | 2.22E-16 | 46  | 99 | 50 | 99 | 0/0 | 0/0 | 0/0 | match | match | match |
| 132306 | Agilent38MB | 1:171073038 | missense | T/T | 2.22E-16 | 67  | 99 | 25 | 72 | 0/0 | 0/0 | 0/0 | match | match | match |
| 163383 | TruSeqV2    | 1:171073038 | missense | T/T | 2.22E-16 | 92  | 99 | 48 | 99 | 0/0 | 0/0 | 0/0 | match | match | match |
| 198564 | Agilent38MB | 1:171073038 | missense | T/T | 5.11E-15 | 132 | 99 | 50 | 99 | 0/0 | 0/0 | 0/0 | match | match | match |
| 108971 | TruSeqV2    | 1:171076888 | missense | G/G | 2.22E-16 | 109 | 99 | 33 | 84 | 0/0 | 0/0 | 0/0 | match | match | match |
| 115239 | TruSeqV2    | 1:171076888 | missense | G/G | 2.22E-16 | 65  | 99 | 45 | 99 | 0/0 | 0/0 | 0/0 | match | match | match |
| 132306 | Agilent38MB | 1:171076888 | missense | G/G | 2.22E-16 | 134 | 99 | 34 | 99 | 0/0 | 0/0 | 0/0 | match | match | match |
| 163383 | TruSeqV2    | 1:171076888 | missense | G/G | 2.22E-16 | 108 | 99 | 36 | 96 | 0/0 | 0/0 | 0/0 | match | match | match |
| 198564 | Agilent38MB | 1:171076888 | missense | G/G | 4.44E-16 | 213 | 99 | 38 | 99 | 0/0 | 0/0 | 0/0 | match | match | match |
| 108971 | TruSeqV2    | 1:171076935 | missense | C/T | 1.78E-15 | 101 | 99 | 34 | 99 | 0/1 | 0/1 | 0/1 | match | match | match |
| 115239 | TruSeqV2    | 1:171076935 | missense | C/C | 2.22E-16 | 62  | 99 | 26 | 66 | 0/0 | 0/0 | 0/0 | match | match | match |
| 132306 | Agilent38MB | 1:171076935 | missense | C/C | 2.22E-16 | 206 | 99 | 28 | 66 | 0/0 | 0/0 | 0/0 | match | match | match |
| 163383 | TruSeqV2    | 1:171076935 | missense | C/C | 2.22E-16 | 97  | 99 | 38 | 99 | 0/0 | 0/0 | 0/0 | match | match | match |
| 198564 | Agilent38MB | 1:171076935 | missense | C/C | 2.22E-16 | 416 | 99 | 34 | 93 | 0/0 | 0/0 | 0/0 | match | match | match |
| 108971 | TruSeqV2    | 1:171076936 | stop     | G/G | 1.33E-15 | 101 | 99 | 36 | 99 | 0/0 | 0/0 | 0/0 | match | match | match |
| 115239 | TruSeqV2    | 1:171076936 | stop     | G/G | 2.22E-16 | 64  | 99 | 25 | 63 | 0/0 | 0/0 | 0/0 | match | match | match |
| 132306 | Agilent38MB | 1:171076936 | stop     | G/G | 4.44E-16 | 203 | 99 | 26 | 66 | 0/0 | 0/0 | 0/0 | match | match | match |
| 163383 | TruSeqV2    | 1:171076936 | stop     | G/G | 2.22E-16 | 98  | 99 | 37 | 99 | 0/0 | 0/0 | 0/0 | match | match | match |
| 198564 | Agilent38MB | 1:171076936 | stop     | G/G | 8.88E-16 | 420 | 99 | 34 | 90 | 0/0 | 0/0 | 0/0 | match | match | match |
| 108971 | TruSeqV2    | 1:171076952 | missense | C/C | 6.66E-16 | 85  | 99 | 45 | 99 | 0/0 | 0/0 | 0/0 | match | match | match |
| 115239 | TruSeqV2    | 1:171076952 | missense | C/C | 8.88E-16 | 57  | 99 | 23 | 60 | 0/0 | 0/0 | 0/0 | match | match | match |
| 132306 | Agilent38MB | 1:171076952 | missense | C/C | 6.66E-16 | 235 | 99 | 26 | 75 | 0/0 | 0/0 | 0/0 | match | match | match |
| 163383 | TruSeqV2    | 1:171076952 | missense | C/C | 1.55E-15 | 88  | 99 | 38 | 95 | 0/0 | 0/0 | 0/0 | match | match | match |
| 198564 | Agilent38MB | 1:171076952 | missense | C/C | 1.55E-15 | 469 | 99 | 33 | 87 | 0/0 | 0/0 | 0/0 | match | match | match |
| 108971 | TruSeqV2    | 1:171076966 | missense | G/G | 3.33E-15 | 85  | 99 | 49 | 99 | 0/0 | 0/0 | 0/0 | match | match | match |
| 115239 | TruSeqV2    | 1:171076966 | missense | A/G | 4.44E-16 | 56  | 99 | 23 | 99 | 0/1 | 0/1 | 0/1 | match | match | match |
| 132306 | Agilent38MB | 1:171076966 | missense | A/G | 4.44E-16 | 232 | 99 | 30 | 99 | 0/1 | 0/1 | 0/1 | match | match | match |
| 163383 | TruSeqV2    | 1:171076966 | missense | A/G | 4.44E-16 | 86  | 99 | 36 | 99 | 0/1 | 0/1 | 0/1 | match | match | match |
| 198564 | Agilent38MB | 1:171076966 | missense | A/G | 6.66E-16 | 415 | 99 | 32 | 99 | 0/1 | 0/1 | 0/1 | match | match | match |
| 108971 | TruSeqV2    | 1:171077331 | missense | T/T | 3.33E-15 | 127 | 99 | 46 | 99 | 0/0 | 0/0 | 0/0 | match | match | match |
| 115239 | TruSeqV2    | 1:171077331 | missense | T/T | 8.44E-15 | 81  | 99 | 21 | 51 | 0/0 | 0/0 | 0/0 | match | match | match |
| 132306 | Agilent38MB | 1:171077331 | missense | T/T | 1.33E-15 | 34  | 78 | 27 | 81 | 0/0 | 0/0 | 0/0 | match | match | match |
| 163383 | TruSeqV2    | 1:171077331 | missense | T/T | 2.50E-13 | 111 | 99 | 30 | 87 | 0/0 | 0/0 | 0/0 | match | match | match |
| 198564 | Agilent38MB | 1:171077331 | missense | T/T | 2.98E-07 | 68  | 99 | 34 | 84 | 0/0 | 0/0 | 0/0 | match | match | match |
| 108971 | TruSeqV2    | 1:171077339 | fs       | -/- | 3.55E-15 | 122 | 99 | 50 | 99 | 0/0 | 0/0 | 0/0 | match | match | match |
| 115239 | TruSeqV2    | 1:171077339 | fs       | -/- | 1.11E-15 | 122 | 99 | 50 | 99 | 0/0 | 0/0 | 0/0 | match | match | match |
| 132306 | Agilent38MB | 1:171077339 | fs       | -/- | 0        | 122 | 99 | 50 | 99 | 0/0 | 0/0 | 0/0 | match | match | match |

|        |             |             |          |     |          |     |    |    |    |     |     |     |       |       |       |
|--------|-------------|-------------|----------|-----|----------|-----|----|----|----|-----|-----|-----|-------|-------|-------|
| 163383 | TruSeqV2    | 1:171077339 | fs       | -/- | 4.44E-16 | 122 | 99 | 50 | 99 | 0/0 | 0/0 | 0/0 | match | match | match |
| 198564 | Agilent38MB | 1:171077339 | fs       | -/- | 2.53E-14 | 122 | 99 | 50 | 99 | 0/0 | 0/0 | 0/0 | match | match | match |
| 108971 | TruSeqV2    | 1:171077372 | splice   | C/C | 6.66E-16 | 106 | 99 | 54 | 99 | 0/0 | 0/0 | 0/0 | match | match | match |
| 115239 | TruSeqV2    | 1:171077372 | splice   | C/G | 7.11E-15 | 54  | 99 | 26 | 99 | 0/1 | 0/1 | 0/1 | match | match | match |
| 132306 | Agilent38MB | 1:171077372 | splice   | C/G | 3.40E-14 | 15  | 99 | 39 | 99 | 0/1 | 0/1 | 0/1 | match | match | match |
| 163383 | TruSeqV2    | 1:171077372 | splice   | C/G | 2.89E-15 | 82  | 99 | 31 | 99 | 0/1 | 0/1 | 0/1 | match | match | match |
| 198564 | Agilent38MB | 1:171077372 | splice   | C/C | 4.44E-16 | 38  | 75 | 36 | 90 | 0/0 | 0/0 | 0/0 | match | match | match |
| 108971 | TruSeqV2    | 1:171080028 | synon    | T/T | 2.22E-16 | 157 | 99 | 38 | 99 | 0/0 | 0/0 | 0/0 | match | match | match |
| 115239 | TruSeqV2    | 1:171080028 | synon    | T/T | 2.22E-16 | 104 | 99 | 33 | 78 | 0/0 | 0/0 | 0/0 | match | match | match |
| 132306 | Agilent38MB | 1:171080028 | synon    | T/T | 2.22E-16 | 241 | 99 | 39 | 99 | 0/0 | 0/0 | 0/0 | match | match | match |
| 163383 | TruSeqV2    | 1:171080028 | synon    | T/T | 2.22E-16 | 139 | 99 | 32 | 93 | 0/0 | 0/0 | 0/0 | match | match | match |
| 198564 | Agilent38MB | 1:171080028 | synon    | T/T | 5.33E-15 | 477 | 99 | 48 | 99 | 0/0 | 0/0 | 0/0 | match | match | match |
| 108971 | TruSeqV2    | 1:171080080 | missense | G/G | 4.44E-16 | 146 | 99 | 45 | 99 | 0/0 | 0/0 | 0/0 | match | match | match |
| 115239 | TruSeqV2    | 1:171080080 | missense | G/G | 4.44E-16 | 99  | 99 | 50 | 99 | 0/0 | 0/0 | 0/0 | match | match | match |
| 132306 | Agilent38MB | 1:171080080 | missense | G/G | 2.22E-16 | 220 | 99 | 29 | 78 | 0/0 | 0/0 | 0/0 | match | match | match |
| 163383 | TruSeqV2    | 1:171080080 | missense | G/G | 2.22E-16 | 130 | 99 | 46 | 99 | 0/0 | 0/0 | 0/0 | match | match | match |
| 198564 | Agilent38MB | 1:171080080 | missense | G/G | 6.66E-16 | 398 | 99 | 47 | 99 | 0/0 | 0/0 | 0/0 | match | match | match |
| 108971 | TruSeqV2    | 1:171083149 | missense | T/T | 4.44E-16 | 128 | 99 | 39 | 95 | 0/0 | 0/0 | 0/0 | match | match | match |
| 115239 | TruSeqV2    | 1:171083149 | missense | T/T | 2.22E-16 | 78  | 99 | 47 | 99 | 0/0 | 0/0 | 0/0 | match | match | match |
| 132306 | Agilent38MB | 1:171083149 | missense | T/T | 8.88E-16 | 45  | 99 | 34 | 99 | 0/0 | 0/0 | 0/0 | match | match | match |
| 163383 | TruSeqV2    | 1:171083149 | missense | T/T | 2.22E-16 | 79  | 99 | 38 | 86 | 0/0 | 0/0 | 0/0 | match | match | match |
| 198564 | Agilent38MB | 1:171083149 | missense | T/T | 2.22E-16 | 95  | 99 | 40 | 99 | 0/0 | 0/0 | 0/0 | match | match | match |
| 108971 | TruSeqV2    | 1:171083174 | synon    | C/C | 1.55E-15 | 145 | 99 | 38 | 88 | 0/0 | 0/0 | 0/0 | match | match | match |
| 115239 | TruSeqV2    | 1:171083174 | synon    | C/C | 8.88E-16 | 99  | 99 | 41 | 79 | 0/0 | 0/0 | 0/0 | match | match | match |
| 132306 | Agilent38MB | 1:171083174 | synon    | C/C | 6.66E-16 | 75  | 99 | 36 | 93 | 0/0 | 0/0 | 0/0 | match | match | match |
| 163383 | TruSeqV2    | 1:171083174 | synon    | C/C | 1.33E-15 | 94  | 99 | 36 | 99 | 0/0 | 0/0 | 0/0 | match | match | match |
| 198564 | Agilent38MB | 1:171083174 | synon    | C/T | 6.66E-16 | 174 | 99 | 42 | 99 | 0/1 | 0/1 | 0/1 | match | match | match |
| 108971 | TruSeqV2    | 1:171083225 | synon    | C/C | 6.66E-16 | 170 | 99 | 41 | 99 | 0/0 | 0/0 | 0/0 | match | match | match |
| 115239 | TruSeqV2    | 1:171083225 | synon    | C/C | 2.22E-16 | 113 | 99 | 43 | 99 | 0/0 | 0/0 | 0/0 | match | match | match |
| 132306 | Agilent38MB | 1:171083225 | synon    | C/C | 3.11E-15 | 101 | 99 | 35 | 96 | 0/0 | 0/0 | 0/0 | match | match | match |
| 163383 | TruSeqV2    | 1:171083225 | synon    | C/C | 2.44E-15 | 127 | 99 | 22 | 45 | 0/0 | 0/0 | 0/0 | match | match | match |
| 198564 | Agilent38MB | 1:171083225 | synon    | C/C | 4.44E-15 | 217 | 99 | 44 | 99 | 0/0 | 0/0 | 0/0 | match | match | match |
| 108971 | TruSeqV2    | 1:171083232 | stop     | G/G | 1.25E-12 | 169 | 99 | 38 | 99 | 0/0 | 0/0 | 0/0 | match | match | match |
| 115239 | TruSeqV2    | 1:171083232 | stop     | G/G | 1.13E-14 | 116 | 99 | 44 | 99 | 0/0 | 0/0 | 0/0 | match | match | match |
| 132306 | Agilent38MB | 1:171083232 | stop     | G/G | 5.93E-13 | 98  | 99 | 35 | 93 | 0/0 | 0/0 | 0/0 | match | match | match |
| 163383 | TruSeqV2    | 1:171083232 | stop     | G/G | 8.38E-13 | 121 | 99 | 22 | 57 | 0/0 | 0/0 | 0/0 | match | match | match |
| 198564 | Agilent38MB | 1:171083232 | stop     | G/G | 6.48E-14 | 218 | 99 | 42 | 99 | 0/0 | 0/0 | 0/0 | match | match | match |
| 108971 | TruSeqV2    | 1:171083242 | missense | A/A | 4.44E-16 | 161 | 99 | 40 | 99 | 0/0 | 0/0 | 0/0 | match | match | match |



|        |             |             |          |     |          |     |    |    |    |     |     |     |       |       |       |
|--------|-------------|-------------|----------|-----|----------|-----|----|----|----|-----|-----|-----|-------|-------|-------|
| 115239 | TruSeqV2    | 1:171083242 | missense | A/A | 2.22E-16 | 109 | 99 | 42 | 99 | 0/0 | 0/0 | 0/0 | match | match | match |
| 132306 | Agilent38MB | 1:171083242 | missense | A/A | 1.78E-15 | 100 | 99 | 34 | 96 | 0/0 | 0/0 | 0/0 | match | match | match |
| 163383 | TruSeqV2    | 1:171083242 | missense | A/A | 6.66E-16 | 122 | 99 | 27 | 81 | 0/0 | 0/0 | 0/0 | match | match | match |
| 198564 | Agilent38MB | 1:171083242 | missense | A/G | 6.66E-16 | 221 | 99 | 42 | 99 | 0/1 | 0/1 | 0/1 | match | match | match |
| 108971 | TruSeqV2    | 1:171083259 | stop     | G/G | 4.44E-16 | 154 | 99 | 41 | 99 | 0/0 | 0/0 | 0/0 | match | match | match |
| 115239 | TruSeqV2    | 1:171083259 | stop     | G/G | 6.66E-16 | 104 | 99 | 45 | 99 | 0/0 | 0/0 | 0/0 | match | match | match |
| 132306 | Agilent38MB | 1:171083259 | stop     | G/G | 6.66E-16 | 104 | 99 | 35 | 93 | 0/0 | 0/0 | 0/0 | match | match | match |
| 163383 | TruSeqV2    | 1:171083259 | stop     | G/G | 8.88E-16 | 119 | 99 | 31 | 90 | 0/0 | 0/0 | 0/0 | match | match | match |
| 198564 | Agilent38MB | 1:171083259 | stop     | G/G | 4.44E-16 | 249 | 99 | 42 | 99 | 0/0 | 0/0 | 0/0 | match | match | match |
| 108971 | TruSeqV2    | 1:171083398 | missense | T/T | 4.44E-15 | 15  | 30 | 54 | 99 | 0/0 | 0/0 | 0/0 | match | match | match |
| 115239 | TruSeqV2    | 1:171083398 | missense | T/T | 2.44E-15 | 14  | 39 | 41 | 99 | 0/0 | 0/0 | 0/0 | match | match | match |
| 132306 | Agilent38MB | 1:171083398 | missense | T/T | 1.11E-15 | 87  | 99 | 30 | 78 | 0/0 | 0/0 | 0/0 | match | match | match |
| 163383 | TruSeqV2    | 1:171083398 | missense | T/T | 1.11E-15 | 24  | 63 | 26 | 54 | 0/0 | 0/0 | 0/0 | match | match | match |
| 198564 | Agilent38MB | 1:171083398 | missense | T/T | 6.66E-16 | 153 | 99 | 51 | 99 | 0/0 | 0/0 | 0/0 | match | match | match |
| 108971 | TruSeqV2    | 1:171083403 | missense | G/G | 8.57E-14 | 13  | 30 | 55 | 99 | 0/0 | 0/0 | 0/0 | match | match | match |
| 115239 | TruSeqV2    | 1:171083403 | missense | G/G | 7.11E-15 | 13  | 33 | 40 | 99 | 0/0 | 0/0 | 0/0 | match | match | match |
| 132306 | Agilent38MB | 1:171083403 | missense | G/G | 4.00E-15 | 87  | 99 | 32 | 87 | 0/0 | 0/0 | 0/0 | match | match | match |
| 163383 | TruSeqV2    | 1:171083403 | missense | G/G | 8.66E-15 | 24  | 57 | 23 | 57 | 0/0 | 0/0 | 0/0 | match | match | match |
| 198564 | Agilent38MB | 1:171083403 | missense | G/G | 8.88E-15 | 158 | 99 | 51 | 99 | 0/0 | 0/0 | 0/0 | match | match | match |
| 108971 | TruSeqV2    | 1:171083479 | missense | G/G | 2.22E-16 | 5   | 12 | 47 | 99 | 0/0 | 0/0 | 0/0 | match | match | match |
| 115239 | TruSeqV2    | 1:171083479 | missense | G/G | 2.22E-16 | 3   | 6  | 37 | 96 | 0/0 | 0/0 | 0/0 | match | match | match |
| 132306 | Agilent38MB | 1:171083479 | missense | G/G | 2.22E-16 | 52  | 99 | 36 | 96 | 0/0 | 0/0 | 0/0 | match | match | match |
| 163383 | TruSeqV2    | 1:171083479 | missense | G/G | 2.22E-16 | 10  | 24 | 27 | 69 | 0/0 | 0/0 | 0/0 | match | match | match |
| 198564 | Agilent38MB | 1:171083479 | missense | G/G | 2.22E-16 | 88  | 99 | 44 | 99 | 0/0 | 0/0 | 0/0 | match | match | match |
| 108971 | TruSeqV2    | 1:171086441 | missense | A/A | 2.22E-16 | 266 | 99 | 41 | 99 | 0/0 | 0/0 | 0/0 | match | match | match |
| 115239 | TruSeqV2    | 1:171086441 | missense | A/A | 2.22E-16 | 185 | 99 | 23 | 51 | 0/0 | 0/0 | 0/0 | match | match | match |
| 132306 | Agilent38MB | 1:171086441 | missense | A/A | 4.44E-16 | 70  | 99 | 38 | 99 | 0/0 | 0/0 | 0/0 | match | match | match |
| 163383 | TruSeqV2    | 1:171086441 | missense | A/A | 2.22E-16 | 231 | 99 | 52 | 99 | 0/0 | 0/0 | 0/0 | match | match | match |
| 198564 | Agilent38MB | 1:171086441 | missense | A/A | 2.22E-16 | 155 | 99 | 41 | 99 | 0/0 | 0/0 | 0/0 | match | match | match |
| 108971 | TruSeqV2    | 1:171086457 | missense | C/C | 6.66E-16 | 239 | 99 | 43 | 99 | 0/0 | 0/0 | 0/0 | match | match | match |
| 115239 | TruSeqV2    | 1:171086457 | missense | C/C | 4.44E-16 | 167 | 99 | 22 | 63 | 0/0 | 0/0 | 0/0 | match | match | match |
| 132306 | Agilent38MB | 1:171086457 | missense | C/C | 2.22E-16 | 69  | 99 | 40 | 93 | 0/0 | 0/0 | 0/0 | match | match | match |
| 163383 | TruSeqV2    | 1:171086457 | missense | C/C | 4.44E-16 | 221 | 99 | 42 | 96 | 0/0 | 0/0 | 0/0 | match | match | match |
| 198564 | Agilent38MB | 1:171086457 | missense | C/C | 6.66E-16 | 155 | 99 | 43 | 99 | 0/0 | 0/0 | 0/0 | match | match | match |
| 108971 | TruSeqV2    | 1:171086490 | missense | G/G | 1.55E-15 | 174 | 99 | 35 | 90 | 0/0 | 0/0 | 0/0 | match | match | match |
| 115239 | TruSeqV2    | 1:171086490 | missense | G/G | 8.88E-16 | 124 | 99 | 40 | 99 | 0/0 | 0/0 | 0/0 | match | match | match |
| 132306 | Agilent38MB | 1:171086490 | missense | G/G | 1.33E-15 | 80  | 99 | 34 | 87 | 0/0 | 0/0 | 0/0 | match | match | match |
| 163383 | TruSeqV2    | 1:171086490 | missense | G/G | 2.22E-16 | 179 | 99 | 35 | 96 | 0/0 | 0/0 | 0/0 | match | match | match |

|        |             |             |          |     |          |     |    |    |    |     |     |     |       |       |       |
|--------|-------------|-------------|----------|-----|----------|-----|----|----|----|-----|-----|-----|-------|-------|-------|
| 198564 | Agilent38MB | 1:171086490 | missense | G/G | 4.44E-16 | 180 | 99 | 46 | 99 | 0/0 | 0/0 | 0/0 | match | match | match |
| 108971 | TruSeqV2    | 1:171118840 | missense | G/G | 2.47E-09 | 133 | 99 | 42 | 99 | 0/0 | 0/0 | 0/0 | match | match | match |
| 115239 | TruSeqV2    | 1:171118840 | missense | G/G | 9.00E-08 | 100 | 99 | 43 | 99 | 0/0 | 0/0 | 0/0 | match | match | match |
| 132306 | Agilent38MB | 1:171118840 | missense | G/G | 2.97E-09 | 1   | 3  | 41 | 99 | 0/0 | 0/0 | 0/0 | match | match | match |
| 163383 | TruSeqV2    | 1:171118840 | missense | G/G | 3.23E-06 | 134 | 99 | 47 | 99 | 0/0 | 0/0 | 0/0 | match | match | match |
| 108971 | TruSeqV2    | 1:171121173 | missense | A/A | 2.22E-16 | 178 | 99 | 43 | 99 | 0/0 | 0/0 | 0/0 | match | match | match |
| 115239 | TruSeqV2    | 1:171121173 | missense | A/A | 2.22E-16 | 114 | 99 | 37 | 68 | 0/0 | 0/0 | 0/0 | match | match | match |
| 132306 | Agilent38MB | 1:171121173 | missense | A/A | 2.22E-16 | 18  | 45 | 30 | 81 | 0/0 | 0/0 | 0/0 | match | match | match |
| 163383 | TruSeqV2    | 1:171121173 | missense | A/A | 2.22E-16 | 184 | 99 | 31 | 81 | 0/0 | 0/0 | 0/0 | match | match | match |
| 198564 | Agilent38MB | 1:171121173 | missense | A/G | 3.77E-15 | 21  | 99 | 32 | 99 | 0/1 | 0/1 | 0/1 | match | match | match |
| 108971 | TruSeqV2    | 1:171121268 | synon    | G/G | 6.66E-16 | 91  | 99 | 34 | 81 | 0/0 | 0/0 | 0/0 | match | match | match |
| 115239 | TruSeqV2    | 1:171121268 | synon    | G/G | 8.66E-15 | 48  | 99 | 32 | 52 | 0/0 | 0/0 | 0/0 | match | match | match |
| 132306 | Agilent38MB | 1:171121268 | synon    | G/G | 1.33E-15 | 18  | 42 | 26 | 66 | 0/0 | 0/0 | 0/0 | match | match | match |
| 163383 | TruSeqV2    | 1:171121268 | synon    | G/G | 2.89E-15 | 67  | 99 | 43 | 99 | 0/0 | 0/0 | 0/0 | match | match | match |
| 108971 | TruSeqV2    | 1:171154959 | missense | A/G | 3.40E-13 | 89  | 99 | 35 | 99 | 0/1 | 0/1 | 0/1 | match | match | match |
| 115239 | TruSeqV2    | 1:171154959 | missense | A/A | 3.77E-15 | 42  | 99 | 40 | 99 | 0/0 | 0/0 | 0/0 | match | match | match |
| 132306 | Agilent38MB | 1:171154959 | missense | A/G | 2.96E-12 | 426 | 99 | 43 | 99 | 0/1 | 0/1 | 0/1 | match | match | match |
| 163383 | TruSeqV2    | 1:171154959 | missense | A/A | 2.22E-15 | 71  | 99 | 36 | 78 | 0/0 | 0/0 | 0/0 | match | match | match |
| 198564 | Agilent38MB | 1:171154959 | missense | A/A | 6.66E-15 | 773 | 99 | 53 | 99 | 0/0 | 0/0 | 0/0 | match | match | match |
| 108971 | TruSeqV2    | 1:171162516 | missense | G/G | 1.78E-15 | 66  | 99 | 43 | 99 | 0/0 | 0/0 | 0/0 | match | match | match |
| 115239 | TruSeqV2    | 1:171162516 | missense | G/G | 1.33E-15 | 41  | 99 | 51 | 99 | 0/0 | 0/0 | 0/0 | match | match | match |
| 132306 | Agilent38MB | 1:171162516 | missense | G/G | 2.44E-15 | 260 | 99 | 50 | 99 | 0/0 | 0/0 | 0/0 | match | match | match |
| 163383 | TruSeqV2    | 1:171162516 | missense | G/G | 6.22E-15 | 53  | 99 | 41 | 99 | 0/0 | 0/0 | 0/0 | match | match | match |
| 198564 | Agilent38MB | 1:171162516 | missense | G/G | 1.55E-15 | 400 | 99 | 51 | 99 | 0/0 | 0/0 | 0/0 | match | match | match |
| 108971 | TruSeqV2    | 1:171162551 | missense | -/- | 4.44E-16 | 66  | 99 | 44 | 99 | 0/0 | 0/0 | 0/0 | match | match | match |
| 115239 | TruSeqV2    | 1:171162551 | missense | -/- | 6.66E-16 | 66  | 99 | 44 | 99 | 0/0 | 0/0 | 0/0 | match | match | match |
| 132306 | Agilent38MB | 1:171162551 | missense | -/- | 8.88E-16 | 66  | 99 | 44 | 99 | 0/0 | 0/0 | 0/0 | match | match | match |
| 163383 | TruSeqV2    | 1:171162551 | missense | -/- | 4.44E-16 | 66  | 99 | 44 | 99 | 0/0 | 0/0 | 0/0 | match | match | match |
| 198564 | Agilent38MB | 1:171162551 | missense | -/- | 4.44E-16 | 66  | 99 | 44 | 99 | 0/0 | 0/0 | 0/0 | match | match | match |
| 108971 | TruSeqV2    | 1:171162583 | missense | T/T | 6.66E-16 | 61  | 99 | 44 | 99 | 0/0 | 0/0 | 0/0 | match | match | match |
| 115239 | TruSeqV2    | 1:171162583 | missense | T/T | 8.88E-16 | 38  | 99 | 58 | 87 | 0/0 | 0/0 | 0/0 | match | match | match |
| 132306 | Agilent38MB | 1:171162583 | missense | T/T | 1.11E-15 | 75  | 99 | 33 | 69 | 0/0 | 0/0 | 0/0 | match | match | match |
| 163383 | TruSeqV2    | 1:171162583 | missense | T/T | 8.88E-16 | 53  | 99 | 42 | 99 | 0/0 | 0/0 | 0/0 | match | match | match |
| 198564 | Agilent38MB | 1:171162583 | missense | T/T | 4.44E-16 | 104 | 99 | 43 | 99 | 0/0 | 0/0 | 0/0 | match | match | match |
| 108971 | TruSeqV2    | 1:171165803 | stop     | G/G | 4.02E-14 | 143 | 99 | 39 | 99 | 0/0 | 0/0 | 0/0 | match | match | match |
| 115239 | TruSeqV2    | 1:171165803 | stop     | G/G | 1.98E-14 | 143 | 99 | 39 | 99 | 0/0 | 0/0 | 0/0 | match | match | match |
| 132306 | Agilent38MB | 1:171165803 | stop     | G/G | 3.77E-15 | 143 | 99 | 39 | 99 | 0/0 | 0/0 | 0/0 | match | match | match |
| 163383 | TruSeqV2    | 1:171165803 | stop     | G/G | 1.38E-14 | 143 | 99 | 39 | 99 | 0/0 | 0/0 | 0/0 | match | match | match |

|        |             |             |          |     |          |     |    |    |    |     |     |     |       |       |       |
|--------|-------------|-------------|----------|-----|----------|-----|----|----|----|-----|-----|-----|-------|-------|-------|
| 198564 | Agilent38MB | 1:171165803 | stop     | G/G | 5.20E-14 | 143 | 99 | 39 | 99 | 0/0 | 0/0 | 0/0 | match | match | match |
| 108971 | TruSeqV2    | 1:171168545 | missense | T/T | 2.22E-16 | 294 | 99 | 55 | 99 | 0/0 | 0/0 | 0/0 | match | match | match |
| 115239 | TruSeqV2    | 1:171168545 | missense | C/T | 2.44E-15 | 189 | 99 | 39 | 99 | 0/1 | 0/1 | 0/1 | match | match | match |
| 132306 | Agilent38MB | 1:171168545 | missense | T/T | 6.66E-16 | 121 | 99 | 46 | 99 | 0/0 | 0/0 | 0/0 | match | match | match |
| 163383 | TruSeqV2    | 1:171168545 | missense | T/T | 4.44E-16 | 230 | 99 | 38 | 99 | 0/0 | 0/0 | 0/0 | match | match | match |
| 198564 | Agilent38MB | 1:171168545 | missense | T/T | 2.44E-15 | 230 | 99 | 46 | 99 | 0/0 | 0/0 | 0/0 | match | match | match |
| 108971 | TruSeqV2    | 1:171168585 | synon    | A/G | 1.55E-15 | 251 | 99 | 43 | 99 | 0/1 | 0/1 | 0/1 | match | match | match |
| 115239 | TruSeqV2    | 1:171168585 | synon    | A/G | 1.22E-14 | 166 | 99 | 40 | 99 | 0/1 | 0/1 | 0/1 | match | match | match |
| 132306 | Agilent38MB | 1:171168585 | synon    | G/G | 1.55E-15 | 182 | 99 | 25 | 78 | 1/1 | 1/1 | 1/1 | match | match | match |
| 163383 | TruSeqV2    | 1:171168585 | synon    | A/G | 1.78E-15 | 210 | 99 | 33 | 99 | 0/1 | 0/1 | 0/1 | match | match | match |
| 198564 | Agilent38MB | 1:171168585 | synon    | A/A | 1.04E-14 | 346 | 99 | 48 | 99 | 0/0 | 0/0 | 0/0 | match | match | match |
| 108971 | TruSeqV2    | 1:171173089 | missense | G/G | 2.22E-16 | 193 | 99 | 25 | 60 | 0/0 | 0/0 | 0/0 | match | match | match |
| 115239 | TruSeqV2    | 1:171173089 | missense | G/G | 2.22E-16 | 119 | 99 | 43 | 99 | 0/0 | 0/0 | 0/0 | match | match | match |
| 132306 | Agilent38MB | 1:171173089 | missense | G/G | 2.22E-16 | 110 | 99 | 32 | 81 | 0/0 | 0/0 | 0/0 | match | match | match |
| 163383 | TruSeqV2    | 1:171173089 | missense | G/G | 2.22E-16 | 173 | 99 | 32 | 93 | 0/0 | 0/0 | 0/0 | match | match | match |
| 198564 | Agilent38MB | 1:171173089 | missense | G/G | 4.44E-16 | 198 | 99 | 52 | 99 | 0/0 | 0/0 | 0/0 | match | match | match |
| 108971 | TruSeqV2    | 1:171173121 | stop     | C/C | 2.22E-16 | 192 | 99 | 37 | 99 | 0/0 | 0/0 | 0/0 | match | match | match |
| 115239 | TruSeqV2    | 1:171173121 | stop     | C/C | 2.22E-16 | 111 | 99 | 44 | 99 | 0/0 | 0/0 | 0/0 | match | match | match |
| 132306 | Agilent38MB | 1:171173121 | stop     | C/C | 2.22E-16 | 104 | 99 | 36 | 99 | 0/0 | 0/0 | 0/0 | match | match | match |
| 163383 | TruSeqV2    | 1:171173121 | stop     | C/C | 2.22E-16 | 163 | 99 | 36 | 96 | 0/0 | 0/0 | 0/0 | match | match | match |
| 198564 | Agilent38MB | 1:171173121 | stop     | C/C | 2.22E-16 | 194 | 99 | 58 | 99 | 0/0 | 0/0 | 0/0 | match | match | match |
| 108971 | TruSeqV2    | 1:171174531 | missense | A/A | 1.33E-15 | 164 | 99 | 37 | 96 | 0/0 | 0/0 | 0/0 | match | match | match |
| 115239 | TruSeqV2    | 1:171174531 | missense | A/A | 1.33E-15 | 104 | 99 | 47 | 99 | 0/0 | 0/0 | 0/0 | match | match | match |
| 132306 | Agilent38MB | 1:171174531 | missense | A/G | 5.33E-15 | 106 | 99 | 31 | 99 | 0/1 | 0/1 | 0/1 | match | match | match |
| 163383 | TruSeqV2    | 1:171174531 | missense | A/G | 1.33E-15 | 151 | 99 | 34 | 99 | 0/1 | 0/1 | 0/1 | match | match | match |
| 198564 | Agilent38MB | 1:171174531 | missense | A/A | 4.44E-16 | 176 | 99 | 60 | 99 | 0/0 | 0/0 | 0/0 | match | match | match |
| 108971 | TruSeqV2    | 1:171174691 | synon    | G/G | 1.13E-12 | 23  | 48 | 50 | 99 | 0/0 | 0/0 | 0/0 | match | match | match |
| 115239 | TruSeqV2    | 1:171174691 | synon    | G/G | 9.55E-15 | 12  | 30 | 44 | 99 | 0/0 | 0/0 | 0/0 | match | match | match |
| 132306 | Agilent38MB | 1:171174691 | synon    | G/G | 6.88E-15 | 121 | 99 | 38 | 99 | 0/0 | 0/0 | 0/0 | match | match | match |
| 163383 | TruSeqV2    | 1:171174691 | synon    | G/G | 1.04E-14 | 30  | 75 | 45 | 99 | 0/0 | 0/0 | 0/0 | match | match | match |
| 198564 | Agilent38MB | 1:171174691 | synon    | G/G | 1.98E-13 | 287 | 99 | 44 | 99 | 0/0 | 0/0 | 0/0 | match | match | match |
| 108971 | TruSeqV2    | 1:171174750 | fs       | -/- | 4.44E-16 | 7   | 18 | 45 | 99 | 0/0 | 0/0 | 0/0 | match | match | match |
| 115239 | TruSeqV2    | 1:171174750 | fs       | -/- | 5.77E-15 | 7   | 18 | 45 | 99 | 0/0 | 0/0 | 0/0 | match | match | match |
| 132306 | Agilent38MB | 1:171174750 | fs       | -/- | 4.44E-16 | 7   | 18 | 45 | 99 | 0/0 | 0/0 | 0/0 | match | match | match |
| 163383 | TruSeqV2    | 1:171174750 | fs       | -/- | 6.66E-16 | 7   | 18 | 45 | 99 | 0/0 | 0/0 | 0/0 | match | match | match |
| 198564 | Agilent38MB | 1:171174750 | fs       | -/- | 7.77E-15 | 7   | 18 | 45 | 99 | 0/0 | 0/0 | 0/0 | match | match | match |
| 108971 | TruSeqV2    | 1:171174762 | missense | G/G | 2.22E-16 | 6   | 9  | 43 | 99 | 0/0 | 0/0 | 0/0 | match | match | match |
| 115239 | TruSeqV2    | 1:171174762 | missense | G/G | 2.22E-16 | 3   | 8  | 36 | 99 | 0/0 | 0/0 | 0/0 | match | match | match |

|        |             |             |           |     |          |     |    |    |    |     |     |     |       |       |       |
|--------|-------------|-------------|-----------|-----|----------|-----|----|----|----|-----|-----|-----|-------|-------|-------|
| 132306 | Agilent38MB | 1:171174762 | missense  | G/G | 2.22E-16 | 75  | 99 | 44 | 99 | 0/0 | 0/0 | 0/0 | match | match | match |
| 163383 | TruSeqV2    | 1:171174762 | missense  | G/G | 2.22E-16 | 7   | 12 | 53 | 99 | 0/0 | 0/0 | 0/0 | match | match | match |
| 198564 | Agilent38MB | 1:171174762 | missense  | G/G | 3.77E-15 | 121 | 99 | 37 | 99 | 0/0 | 0/0 | 0/0 | match | match | match |
| 108971 | TruSeqV2    | 1:171176879 | synon     | G/G | 6.66E-16 | 90  | 99 | 44 | 99 | 0/0 | 0/0 | 0/0 | match | match | match |
| 115239 | TruSeqV2    | 1:171176879 | synon     | G/G | 4.44E-16 | 74  | 99 | 46 | 99 | 0/0 | 0/0 | 0/0 | match | match | match |
| 132306 | Agilent38MB | 1:171176879 | synon     | G/G | 1.33E-15 | 157 | 99 | 36 | 99 | 0/0 | 0/0 | 0/0 | match | match | match |
| 163383 | TruSeqV2    | 1:171176879 | synon     | G/G | 1.11E-15 | 85  | 99 | 47 | 99 | 0/0 | 0/0 | 0/0 | match | match | match |
| 198564 | Agilent38MB | 1:171176879 | synon     | G/G | 4.44E-16 | 296 | 99 | 59 | 99 | 0/0 | 0/0 | 0/0 | match | match | match |
| 108971 | TruSeqV2    | 1:171176912 | missense  | T/T | 8.88E-16 | 58  | 99 | 35 | 90 | 0/0 | 0/0 | 0/0 | match | match | match |
| 115239 | TruSeqV2    | 1:171176912 | missense  | T/T | 6.66E-16 | 52  | 99 | 51 | 31 | 0/0 | 0/0 | 0/0 | match | match | match |
| 132306 | Agilent38MB | 1:171176912 | missense  | T/T | 6.66E-16 | 115 | 99 | 39 | 99 | 0/0 | 0/0 | 0/0 | match | match | match |
| 163383 | TruSeqV2    | 1:171176912 | missense  | T/T | 6.66E-16 | 62  | 99 | 45 | 99 | 0/0 | 0/0 | 0/0 | match | match | match |
| 198564 | Agilent38MB | 1:171176912 | missense  | T/T | 1.78E-15 | 175 | 99 | 65 | 99 | 0/0 | 0/0 | 0/0 | match | match | match |
| 108971 | TruSeqV2    | 1:171178090 | stop loss | T/T | 2.22E-16 | 176 | 99 | 39 | 99 | 0/0 | 0/0 | 0/0 | match | match | match |
| 115239 | TruSeqV2    | 1:171178090 | stop loss | T/T | 2.22E-16 | 152 | 99 | 29 | 54 | 0/0 | 0/0 | 0/0 | match | match | match |
| 132306 | Agilent38MB | 1:171178090 | stop loss | T/T | 2.22E-16 | 15  | 24 | 45 | 99 | 0/0 | 0/0 | 0/0 | match | match | match |
| 163383 | TruSeqV2    | 1:171178090 | stop loss | T/T | 4.44E-16 | 165 | 99 | 40 | 99 | 0/0 | 0/0 | 0/0 | match | match | match |
| 198564 | Agilent38MB | 1:171178090 | stop loss | T/T | 8.88E-16 | 38  | 72 | 39 | 99 | 0/0 | 0/0 | 0/0 | match | match | match |
| 108971 | TruSeqV2    | 1:171178152 | 3'UTR     | A/A | 4.44E-16 | 138 | 99 | 33 | 90 | 0/0 | 0/0 | 0/0 | match | match | match |
| 115239 | TruSeqV2    | 1:171178152 | 3'UTR     | G/G | 1.71E-13 | 103 | 99 | 39 | 73 | 1/1 | 1/1 | 1/1 | match | match | match |
| 132306 | Agilent38MB | 1:171178152 | 3'UTR     | A/A | 1.11E-15 | 1   | 3  | 38 | 93 | 0/0 | 0/0 | 0/0 | match | match | match |
| 163383 | TruSeqV2    | 1:171178152 | 3'UTR     | A/A | 4.22E-15 | 127 | 99 | 32 | 78 | 0/0 | 0/0 | 0/0 | match | match | match |
| 198564 | Agilent38MB | 1:171178152 | 3'UTR     | A/A | 4.44E-15 | 7   | 15 | 31 | 84 | 0/0 | 0/0 | 0/0 | match | match | match |
| 108971 | TruSeqV2    | 1:171178205 | 3'UTR     | -/- | 4.44E-16 | 112 | 99 | 35 | 93 | 0/0 | 0/0 | 0/0 | match | match | match |
| 115239 | TruSeqV2    | 1:171178205 | 3'UTR     | -/- | 4.44E-16 | 112 | 99 | 35 | 93 | 0/0 | 0/0 | 0/0 | match | match | match |
| 132306 | Agilent38MB | 1:171178205 | 3'UTR     | -/- | 1.33E-15 | 112 | 99 | 35 | 93 | 0/0 | 0/0 | 0/0 | match | match | match |
| 163383 | TruSeqV2    | 1:171178205 | 3'UTR     | -/- | 4.44E-16 | 112 | 99 | 35 | 93 | 0/0 | 0/0 | 0/0 | match | match | match |
| 198564 | Agilent38MB | 1:171178205 | 3'UTR     | -/- | 3.55E-15 | 112 | 99 | 35 | 93 | 0/0 | 0/0 | 0/0 | match | match | match |
| 108971 | TruSeqV2    | 1:171179025 | 3'UTR     | T/T | 4.22E-15 | 4   | 9  | 39 | 99 | 0/0 | 0/0 | 0/0 | match | match | match |
| 115239 | TruSeqV2    | 1:171179025 | 3'UTR     | T/T | 4.44E-16 | 4   | 9  | 43 | 99 | 0/0 | 0/0 | 0/0 | match | match | match |
| 163383 | TruSeqV2    | 1:171179025 | 3'UTR     | T/T | 2.00E-15 | 3   | 9  | 42 | 99 | 0/0 | 0/0 | 0/0 | match | match | match |
| 163383 | TruSeqV2    | 1:171179477 | 3'UTR     | C/C | 1.55E-15 | 1   | 3  | 51 | 99 | 0/0 | 0/0 | 0/0 | match | match | match |
| 108971 | TruSeqV2    | 1:171236840 | missense  | C/C | 2.22E-16 | 105 | 99 | 44 | 99 | 0/0 | 0/0 | 0/0 | match | match | match |
| 115239 | TruSeqV2    | 1:171236840 | missense  | C/C | 6.66E-16 | 59  | 99 | 51 | 99 | 0/0 | 0/0 | 0/0 | match | match | match |
| 132306 | Agilent38MB | 1:171236840 | missense  | C/C | 2.22E-16 | 130 | 99 | 36 | 99 | 0/0 | 0/0 | 0/0 | match | match | match |
| 163383 | TruSeqV2    | 1:171236840 | missense  | C/C | 4.44E-16 | 70  | 99 | 46 | 99 | 0/0 | 0/0 | 0/0 | match | match | match |
| 198564 | Agilent38MB | 1:171236840 | missense  | C/C | 8.88E-16 | 262 | 99 | 43 | 99 | 0/0 | 0/0 | 0/0 | match | match | match |
| 108971 | TruSeqV2    | 1:171250044 | synon     | C/C | 2.22E-15 | 152 | 99 | 50 | 99 | 0/0 | 0/0 | 0/0 | match | match | match |

|        |             |             |          |     |          |     |    |    |    |     |     |     |       |       |       |
|--------|-------------|-------------|----------|-----|----------|-----|----|----|----|-----|-----|-----|-------|-------|-------|
| 115239 | TruSeqV2    | 1:171250044 | synon    | C/C | 4.44E-16 | 107 | 99 | 53 | 80 | 0/0 | 0/0 | 0/0 | match | match | match |
| 132306 | Agilent38MB | 1:171250044 | synon    | C/C | 4.44E-16 | 130 | 99 | 43 | 99 | 0/0 | 0/0 | 0/0 | match | match | match |
| 163383 | TruSeqV2    | 1:171250044 | synon    | C/T | 1.89E-14 | 131 | 99 | 44 | 99 | 0/1 | 0/1 | 0/1 | match | match | match |
| 198564 | Agilent38MB | 1:171250044 | synon    | C/C | 4.00E-15 | 242 | 99 | 53 | 99 | 0/0 | 0/0 | 0/0 | match | match | match |
| 108971 | TruSeqV2    | 1:171251196 | missense | A/A | 6.66E-16 | 217 | 99 | 46 | 99 | 0/0 | 0/0 | 0/0 | match | match | match |
| 115239 | TruSeqV2    | 1:171251196 | missense | A/A | 2.66E-15 | 138 | 99 | 50 | 99 | 0/0 | 0/0 | 0/0 | match | match | match |
| 132306 | Agilent38MB | 1:171251196 | missense | A/A | 4.44E-16 | 116 | 99 | 32 | 75 | 0/0 | 0/0 | 0/0 | match | match | match |
| 163383 | TruSeqV2    | 1:171251196 | missense | A/A | 1.11E-15 | 171 | 99 | 30 | 81 | 0/0 | 0/0 | 0/0 | match | match | match |
| 198564 | Agilent38MB | 1:171251196 | missense | A/A | 4.44E-16 | 219 | 99 | 47 | 99 | 0/0 | 0/0 | 0/0 | match | match | match |
| 108971 | TruSeqV2    | 1:171252287 | synon    | A/A | 1.49E-14 | 105 | 99 | 50 | 99 | 0/0 | 0/0 | 0/0 | match | match | match |
| 115239 | TruSeqV2    | 1:171252287 | synon    | A/A | 1.31E-13 | 48  | 99 | 43 | 50 | 0/0 | 0/0 | 0/0 | match | match | match |
| 132306 | Agilent38MB | 1:171252287 | synon    | A/A | 1.04E-14 | 37  | 99 | 35 | 99 | 0/0 | 0/0 | 0/0 | match | match | match |
| 163383 | TruSeqV2    | 1:171252287 | synon    | A/G | 4.00E-15 | 86  | 99 | 38 | 99 | 0/1 | 0/1 | 0/1 | match | match | match |
| 198564 | Agilent38MB | 1:171252287 | synon    | A/A | 7.56E-11 | 94  | 99 | 40 | 99 | 0/0 | 0/0 | 0/0 | match | match | match |
| 108971 | TruSeqV2    | 1:171254588 | stop     | C/C | 1.33E-15 | 160 | 99 | 45 | 99 | 0/0 | 0/0 | 0/0 | match | match | match |
| 115239 | TruSeqV2    | 1:171254588 | stop     | C/C | 1.33E-15 | 108 | 99 | 31 | 84 | 0/0 | 0/0 | 0/0 | match | match | match |
| 132306 | Agilent38MB | 1:171254588 | stop     | C/C | 2.22E-16 | 145 | 99 | 28 | 66 | 0/0 | 0/0 | 0/0 | match | match | match |
| 163383 | TruSeqV2    | 1:171254588 | stop     | C/C | 4.00E-15 | 149 | 99 | 36 | 97 | 0/0 | 0/0 | 0/0 | match | match | match |
| 198564 | Agilent38MB | 1:171254588 | stop     | C/C | 8.88E-16 | 187 | 99 | 33 | 90 | 0/0 | 0/0 | 0/0 | match | match | match |
| 108971 | TruSeqV2    | 1:171254794 | 3'UTR    | C/C | 8.88E-16 | 124 | 99 | 30 | 78 | 0/0 | 0/0 | 0/0 | match | match | match |
| 115239 | TruSeqV2    | 1:171254794 | 3'UTR    | C/C | 4.44E-16 | 72  | 99 | 33 | 55 | 0/0 | 0/0 | 0/0 | match | match | match |
| 163383 | TruSeqV2    | 1:171254794 | 3'UTR    | C/C | 1.11E-15 | 124 | 99 | 35 | 75 | 0/0 | 0/0 | 0/0 | match | match | match |
| 198564 | Agilent38MB | 1:171254794 | 3'UTR    | C/C | 4.44E-16 | 2   | 3  | 43 | 99 | 0/0 | 0/0 | 0/0 | match | match | match |
| 108971 | TruSeqV2    | 1:171254890 | 3'UTR    | C/C | 1.33E-15 | 114 | 99 | 42 | 99 | 0/0 | 0/0 | 0/0 | match | match | match |
| 115239 | TruSeqV2    | 1:171254890 | 3'UTR    | C/C | 1.33E-15 | 68  | 99 | 36 | 13 | 0/0 | 0/0 | 0/0 | match | match | match |
| 163383 | TruSeqV2    | 1:171254890 | 3'UTR    | C/T | 3.55E-15 | 94  | 99 | 34 | 99 | 0/1 | 0/1 | 0/1 | match | match | match |
| 198564 | Agilent38MB | 1:171254890 | 3'UTR    | C/C | 7.33E-15 | 1   | 3  | 25 | 63 | 0/0 | 0/0 | 0/0 | match | match | match |
| 108971 | TruSeqV2    | 1:171303565 | synon    | C/C | 8.88E-16 | 54  | 99 | 53 | 99 | 0/0 | 0/0 | 0/0 | match | match | match |
| 115239 | TruSeqV2    | 1:171303565 | synon    | C/C | 6.66E-16 | 42  | 99 | 41 | 99 | 0/0 | 0/0 | 0/0 | match | match | match |
| 132306 | Agilent38MB | 1:171303565 | synon    | C/C | 2.22E-15 | 58  | 99 | 28 | 78 | 0/0 | 0/0 | 0/0 | match | match | match |
| 163383 | TruSeqV2    | 1:171303565 | synon    | C/C | 6.66E-16 | 33  | 93 | 28 | 75 | 0/0 | 0/0 | 0/0 | match | match | match |
| 198564 | Agilent38MB | 1:171303565 | synon    | C/C | 4.44E-16 | 88  | 99 | 42 | 99 | 0/0 | 0/0 | 0/0 | match | match | match |
| 108971 | TruSeqV2    | 1:171303644 | missense | A/A | 9.33E-15 | 65  | 99 | 47 | 99 | 0/0 | 0/0 | 0/0 | match | match | match |
| 115239 | TruSeqV2    | 1:171303644 | missense | A/A | 7.77E-15 | 52  | 99 | 55 | 99 | 0/0 | 0/0 | 0/0 | match | match | match |
| 132306 | Agilent38MB | 1:171303644 | missense | A/A | 4.20E-14 | 100 | 99 | 42 | 99 | 0/0 | 0/0 | 0/0 | match | match | match |
| 163383 | TruSeqV2    | 1:171303644 | missense | A/A | 2.66E-15 | 54  | 99 | 40 | 99 | 0/0 | 0/0 | 0/0 | match | match | match |
| 198564 | Agilent38MB | 1:171303644 | missense | A/A | 2.22E-16 | 135 | 99 | 43 | 99 | 0/0 | 0/0 | 0/0 | match | match | match |
| 108971 | TruSeqV2    | 1:171303690 | missense | T/T | 4.44E-15 | 39  | 99 | 48 | 99 | 0/0 | 0/0 | 0/0 | match | match | match |

|        |             |             |          |     |          |     |    |    |    |     |     |     |       |       |       |
|--------|-------------|-------------|----------|-----|----------|-----|----|----|----|-----|-----|-----|-------|-------|-------|
| 115239 | TruSeqV2    | 1:171303690 | missense | T/T | 1.29E-14 | 37  | 90 | 63 | 99 | 0/0 | 0/0 | 0/0 | match | match | match |
| 132306 | Agilent38MB | 1:171303690 | missense | T/T | 1.60E-14 | 102 | 99 | 49 | 99 | 0/0 | 0/0 | 0/0 | match | match | match |
| 163383 | TruSeqV2    | 1:171303690 | missense | T/T | 2.98E-14 | 34  | 81 | 50 | 99 | 0/0 | 0/0 | 0/0 | match | match | match |
| 198564 | Agilent38MB | 1:171303690 | missense | T/T | 4.88E-15 | 179 | 99 | 44 | 99 | 0/0 | 0/0 | 0/0 | match | match | match |
| 108971 | TruSeqV2    | 1:171303737 | missense | G/G | 2.22E-16 | 15  | 45 | 53 | 99 | 0/0 | 0/0 | 0/0 | match | match | match |
| 115239 | TruSeqV2    | 1:171303737 | missense | G/G | 4.44E-16 | 21  | 57 | 57 | 99 | 0/0 | 0/0 | 0/0 | match | match | match |
| 132306 | Agilent38MB | 1:171303737 | missense | G/G | 2.22E-16 | 99  | 99 | 43 | 99 | 0/0 | 0/0 | 0/0 | match | match | match |
| 163383 | TruSeqV2    | 1:171303737 | missense | G/G | 2.22E-16 | 11  | 27 | 44 | 99 | 0/0 | 0/0 | 0/0 | match | match | match |
| 198564 | Agilent38MB | 1:171303737 | missense | G/G | 6.66E-16 | 172 | 99 | 66 | 99 | 0/0 | 0/0 | 0/0 | match | match | match |
| 132306 | Agilent38MB | 1:171307155 | intronic | C/C | 4.92E-05 | 1   | 3  | 34 | 90 | 0/0 | 0/0 | 0/0 | match | match | match |
| 108971 | TruSeqV2    | 1:171308832 | intronic | A/A | 1.17E-12 | 778 | 99 | 44 | 99 | 0/0 | 0/0 | 0/0 | match | match | match |
| 115239 | TruSeqV2    | 1:171308832 | intronic | G/G | 2.00E-15 | 614 | 99 | 25 | 75 | 1/1 | 1/1 | 1/1 | match | match | match |
| 132306 | Agilent38MB | 1:171308832 | intronic | A/G | 4.44E-16 | 48  | 99 | 39 | 99 | 0/1 | 0/1 | 0/1 | match | match | match |
| 163383 | TruSeqV2    | 1:171308832 | intronic | A/G | 6.66E-16 | 603 | 99 | 41 | 99 | 0/1 | 0/1 | 0/1 | match | match | match |
| 198564 | Agilent38MB | 1:171308832 | intronic | A/A | 1.20E-14 | 85  | 99 | 43 | 99 | 0/0 | 0/0 | 0/0 | match | match | match |
| 108971 | TruSeqV2    | 1:20915535  | 5'UTR    | G/G | 2.22E-16 | 55  | 99 | 39 | 99 | 0/0 | 0/0 | 0/0 | match | match | match |
| 115239 | TruSeqV2    | 1:20915535  | 5'UTR    | G/G | 4.44E-16 | 37  | 99 | 10 | 30 | 0/0 | 0/0 | 0/0 | match | match | match |
| 132306 | Agilent38MB | 1:20915535  | 5'UTR    | G/G | 8.88E-16 | 3   | 9  | 25 | 69 | 0/0 | 0/0 | 0/0 | match | match | match |
| 163383 | TruSeqV2    | 1:20915535  | 5'UTR    | G/G | 2.22E-16 | 45  | 99 | 32 | 85 | 0/0 | 0/0 | 0/0 | match | match | match |
| 198564 | Agilent38MB | 1:20915535  | 5'UTR    | G/G | 6.66E-16 | 8   | 18 | 40 | 96 | 0/0 | 0/0 | 0/0 | match | match | match |
| 108971 | TruSeqV2    | 1:20915701  | missense | A/A | 1.78E-15 | 83  | 99 | 37 | 96 | 0/0 | 0/0 | 0/0 | match | match | match |
| 115239 | TruSeqV2    | 1:20915701  | missense | A/C | 1.33E-15 | 45  | 99 | 23 | 99 | 0/1 | 0/1 | 0/1 | match | match | match |
| 132306 | Agilent38MB | 1:20915701  | missense | C/C | 2.73E-14 | 18  | 54 | 25 | 74 | 1/1 | 1/1 | 1/1 | match | match | match |
| 163383 | TruSeqV2    | 1:20915701  | missense | A/A | 8.88E-16 | 53  | 99 | 32 | 87 | 0/0 | 0/0 | 0/0 | match | match | match |
| 198564 | Agilent38MB | 1:20915701  | missense | A/A | 1.11E-15 | 39  | 90 | 44 | 99 | 0/0 | 0/0 | 0/0 | match | match | match |
| 108971 | TruSeqV2    | 1:20931474  | missense | G/G | 4.44E-16 | 345 | 99 | 42 | 99 | 0/0 | 0/0 | 0/0 | match | match | match |
| 115239 | TruSeqV2    | 1:20931474  | missense | G/G | 2.22E-16 | 208 | 99 | 33 | 96 | 0/0 | 0/0 | 0/0 | match | match | match |
| 132306 | Agilent38MB | 1:20931474  | missense | G/G | 8.88E-16 | 69  | 99 | 37 | 93 | 0/0 | 0/0 | 0/0 | match | match | match |
| 163383 | TruSeqV2    | 1:20931474  | missense | G/G | 2.22E-16 | 253 | 99 | 28 | 72 | 0/0 | 0/0 | 0/0 | match | match | match |
| 198564 | Agilent38MB | 1:20931474  | missense | G/G | 4.44E-16 | 120 | 99 | 42 | 99 | 0/0 | 0/0 | 0/0 | match | match | match |
| 108971 | TruSeqV2    | 1:20945055  | synon    | C/T | 2.89E-15 | 94  | 99 | 27 | 99 | 0/1 | 0/1 | 0/1 | match | match | match |
| 115239 | TruSeqV2    | 1:20945055  | synon    | C/C | 8.88E-16 | 57  | 99 | 23 | 25 | 0/0 | 0/0 | 0/0 | match | match | match |
| 132306 | Agilent38MB | 1:20945055  | synon    | C/T | 1.33E-15 | 114 | 99 | 31 | 99 | 0/1 | 0/1 | 0/1 | match | match | match |
| 163383 | TruSeqV2    | 1:20945055  | synon    | C/C | 6.66E-16 | 78  | 99 | 36 | 81 | 0/0 | 0/0 | 0/0 | match | match | match |
| 198564 | Agilent38MB | 1:20945055  | synon    | C/C | 1.11E-15 | 171 | 99 | 41 | 97 | 0/0 | 0/0 | 0/0 | match | match | match |
| 108971 | TruSeqV2    | 1:226016558 | missense | G/G | 1.40E-14 | 89  | 99 | 18 | 9  | 0/0 | 0/0 | 0/0 | match | match | match |
| 115239 | TruSeqV2    | 1:226016558 | missense | G/G | 1.11E-15 | 75  | 99 | 18 | 39 | 0/0 | 0/0 | 0/0 | match | match | match |
| 132306 | Agilent38MB | 1:226016558 | missense | G/G | 4.22E-15 | 12  | 30 | 34 | 90 | 0/0 | 0/0 | 0/0 | match | match | match |

|        |             |             |          |     |          |     |    |    |    |     |     |     |       |       |       |
|--------|-------------|-------------|----------|-----|----------|-----|----|----|----|-----|-----|-----|-------|-------|-------|
| 163383 | TruSeqV2    | 1:226016558 | missense | G/G | 3.51E-14 | 77  | 99 | 23 | 57 | 0/0 | 0/0 | 0/0 | match | match | match |
| 198564 | Agilent38MB | 1:226016558 | missense | G/G | 2.00E-13 | 42  | 96 | 26 | 72 | 0/0 | 0/0 | 0/0 | match | match | match |
| 108971 | TruSeqV2    | 1:226016575 | missense | C/C | 2.22E-16 | 83  | 99 | 31 | 87 | 0/0 | 0/0 | 0/0 | match | match | match |
| 115239 | TruSeqV2    | 1:226016575 | missense | C/C | 2.22E-16 | 67  | 99 | 15 | 36 | 0/0 | 0/0 | 0/0 | match | match | match |
| 132306 | Agilent38MB | 1:226016575 | missense | C/C | 4.44E-16 | 5   | 12 | 33 | 87 | 0/0 | 0/0 | 0/0 | match | match | match |
| 163383 | TruSeqV2    | 1:226016575 | missense | C/C | 4.44E-16 | 65  | 99 | 21 | 42 | 0/0 | 0/0 | 0/0 | match | match | match |
| 198564 | Agilent38MB | 1:226016575 | missense | C/C | 2.22E-16 | 29  | 48 | 23 | 60 | 0/0 | 0/0 | 0/0 | match | match | match |
| 108971 | TruSeqV2    | 1:226019500 | synon    | T/T | 1.33E-15 | 162 | 99 | 39 | 99 | 0/0 | 0/0 | 0/0 | match | match | match |
| 115239 | TruSeqV2    | 1:226019500 | synon    | T/T | 6.66E-16 | 88  | 99 | 28 | 63 | 0/0 | 0/0 | 0/0 | match | match | match |
| 132306 | Agilent38MB | 1:226019500 | synon    | T/T | 6.66E-16 | 141 | 99 | 31 | 80 | 0/0 | 0/0 | 0/0 | match | match | match |
| 163383 | TruSeqV2    | 1:226019500 | synon    | T/T | 8.88E-16 | 137 | 99 | 31 | 69 | 0/0 | 0/0 | 0/0 | match | match | match |
| 198564 | Agilent38MB | 1:226019500 | synon    | T/T | 9.77E-15 | 253 | 99 | 54 | 99 | 0/0 | 0/0 | 0/0 | match | match | match |
| 108971 | TruSeqV2    | 1:226019586 | stop     | G/G | 1.78E-15 | 219 | 99 | 44 | 99 | 0/0 | 0/0 | 0/0 | match | match | match |
| 115239 | TruSeqV2    | 1:226019586 | stop     | G/G | 2.00E-15 | 146 | 99 | 41 | 99 | 0/0 | 0/0 | 0/0 | match | match | match |
| 132306 | Agilent38MB | 1:226019586 | stop     | G/G | 1.55E-15 | 90  | 99 | 42 | 99 | 0/0 | 0/0 | 0/0 | match | match | match |
| 163383 | TruSeqV2    | 1:226019586 | stop     | G/G | 4.44E-16 | 157 | 99 | 48 | 99 | 0/0 | 0/0 | 0/0 | match | match | match |
| 198564 | Agilent38MB | 1:226019586 | stop     | G/G | 3.84E-12 | 152 | 99 | 39 | 99 | 0/0 | 0/0 | 0/0 | match | match | match |
| 108971 | TruSeqV2    | 1:226019599 | synon    | T/T | 1.11E-15 | 211 | 99 | 50 | 99 | 0/0 | 0/0 | 0/0 | match | match | match |
| 115239 | TruSeqV2    | 1:226019599 | synon    | T/T | 6.66E-16 | 132 | 99 | 43 | 99 | 0/0 | 0/0 | 0/0 | match | match | match |
| 132306 | Agilent38MB | 1:226019599 | synon    | T/T | 6.66E-16 | 91  | 99 | 45 | 99 | 0/0 | 0/0 | 0/0 | match | match | match |
| 163383 | TruSeqV2    | 1:226019599 | synon    | C/T | 7.88E-14 | 145 | 99 | 47 | 99 | 0/1 | 0/1 | 0/1 | match | match | match |
| 198564 | Agilent38MB | 1:226019599 | synon    | T/T | 3.04E-14 | 158 | 99 | 42 | 99 | 0/0 | 0/0 | 0/0 | match | match | match |
| 108971 | TruSeqV2    | 1:226019633 | missense | C/C | 1.42E-14 | 159 | 99 | 43 | 99 | 1/1 | 1/1 | 1/1 | match | match | match |
| 115239 | TruSeqV2    | 1:226019633 | missense | C/T | 8.88E-16 | 92  | 99 | 43 | 99 | 0/1 | 0/1 | 0/1 | match | match | match |
| 132306 | Agilent38MB | 1:226019633 | missense | T/T | 4.44E-16 | 113 | 99 | 44 | 99 | 0/0 | 0/0 | 0/0 | match | match | match |
| 163383 | TruSeqV2    | 1:226019633 | missense | C/C | 2.44E-15 | 123 | 99 | 35 | 99 | 1/1 | 1/1 | 1/1 | match | match | match |
| 198564 | Agilent38MB | 1:226019633 | missense | C/T | 4.44E-16 | 174 | 99 | 41 | 99 | 0/1 | 0/1 | 0/1 | match | match | match |
| 108971 | TruSeqV2    | 1:226019653 | missense | G/G | 8.88E-16 | 135 | 99 | 45 | 99 | 0/0 | 0/0 | 0/0 | match | match | match |
| 115239 | TruSeqV2    | 1:226019653 | missense | A/G | 2.00E-15 | 77  | 99 | 44 | 99 | 0/1 | 0/1 | 0/1 | match | match | match |
| 132306 | Agilent38MB | 1:226019653 | missense | G/G | 2.44E-15 | 98  | 99 | 40 | 99 | 0/0 | 0/0 | 0/0 | match | match | match |
| 163383 | TruSeqV2    | 1:226019653 | missense | G/G | 6.66E-16 | 104 | 99 | 38 | 99 | 0/0 | 0/0 | 0/0 | match | match | match |
| 198564 | Agilent38MB | 1:226019653 | missense | G/G | 2.00E-15 | 161 | 99 | 44 | 99 | 0/0 | 0/0 | 0/0 | match | match | match |
| 108971 | TruSeqV2    | 1:226027659 | synon    | C/C | 8.88E-16 | 119 | 99 | 29 | 72 | 0/0 | 0/0 | 0/0 | match | match | match |
| 115239 | TruSeqV2    | 1:226027659 | synon    | C/C | 8.88E-16 | 67  | 99 | 18 | 45 | 0/0 | 0/0 | 0/0 | match | match | match |
| 132306 | Agilent38MB | 1:226027659 | synon    | C/C | 4.44E-16 | 154 | 99 | 26 | 69 | 0/0 | 0/0 | 0/0 | match | match | match |
| 163383 | TruSeqV2    | 1:226027659 | synon    | C/C | 8.88E-16 | 94  | 99 | 44 | 99 | 0/0 | 0/0 | 0/0 | match | match | match |
| 198564 | Agilent38MB | 1:226027659 | synon    | C/C | 4.44E-16 | 254 | 99 | 44 | 99 | 0/0 | 0/0 | 0/0 | match | match | match |
| 108971 | TruSeqV2    | 1:226032229 | synon    | C/C | 8.88E-16 | 114 | 99 | 37 | 82 | 0/0 | 0/0 | 0/0 | match | match | match |

|        |             |             |          |     |          |     |    |    |    |     |     |     |       |       |       |
|--------|-------------|-------------|----------|-----|----------|-----|----|----|----|-----|-----|-----|-------|-------|-------|
| 115239 | TruSeqV2    | 1:226032229 | synon    | C/C | 2.44E-15 | 85  | 99 | 25 | 66 | 0/0 | 0/0 | 0/0 | match | match | match |
| 132306 | Agilent38MB | 1:226032229 | synon    | C/C | 1.11E-15 | 74  | 99 | 30 | 81 | 0/0 | 0/0 | 0/0 | match | match | match |
| 163383 | TruSeqV2    | 1:226032229 | synon    | C/T | 3.77E-15 | 93  | 99 | 42 | 99 | 0/1 | 0/1 | 0/1 | match | match | match |
| 198564 | Agilent38MB | 1:226032229 | synon    | C/C | 4.22E-15 | 154 | 99 | 32 | 78 | 0/0 | 0/0 | 0/0 | match | match | match |
| 108971 | TruSeqV2    | 1:226032896 | synon    | T/T | 8.24E-11 | 71  | 99 | 24 | 54 | 0/0 | 0/0 | 0/0 | match | match | match |
| 115239 | TruSeqV2    | 1:226032896 | synon    | T/T | 7.15E-14 | 36  | 99 | 14 | 33 | 0/0 | 0/0 | 0/0 | match | match | match |
| 132306 | Agilent38MB | 1:226032896 | synon    | T/T | 1.85E-13 | 152 | 99 | 24 | 69 | 0/0 | 0/0 | 0/0 | match | match | match |
| 163383 | TruSeqV2    | 1:226032896 | synon    | T/T | 1.66E-12 | 49  | 99 | 22 | 57 | 0/0 | 0/0 | 0/0 | match | match | match |
| 198564 | Agilent38MB | 1:226032896 | synon    | T/T | 1.02E-13 | 285 | 99 | 29 | 72 | 0/0 | 0/0 | 0/0 | match | match | match |
| 108971 | TruSeqV2    | 1:226032928 | synon    | G/G | 6.46E-14 | 64  | 99 | 20 | 57 | 0/0 | 0/0 | 0/0 | match | match | match |
| 115239 | TruSeqV2    | 1:226032928 | synon    | G/G | 6.66E-14 | 43  | 99 | 15 | 39 | 0/0 | 0/0 | 0/0 | match | match | match |
| 132306 | Agilent38MB | 1:226032928 | synon    | G/G | 2.89E-15 | 117 | 99 | 25 | 66 | 0/0 | 0/0 | 0/0 | match | match | match |
| 163383 | TruSeqV2    | 1:226032928 | synon    | G/G | 4.66E-15 | 50  | 99 | 21 | 54 | 0/0 | 0/0 | 0/0 | match | match | match |
| 198564 | Agilent38MB | 1:226032928 | synon    | G/G | 1.36E-11 | 218 | 99 | 20 | 57 | 0/0 | 0/0 | 0/0 | match | match | match |
| 108971 | TruSeqV2    | 1:226033030 | synon    | G/G | 3.33E-15 | 21  | 57 | 21 | 48 | 0/0 | 0/0 | 0/0 | match | match | match |
| 115239 | TruSeqV2    | 1:226033030 | synon    | G/G | 1.78E-15 | 13  | 39 | 11 | 27 | 0/0 | 0/0 | 0/0 | match | match | match |
| 132306 | Agilent38MB | 1:226033030 | synon    | G/G | 2.00E-15 | 22  | 48 | 14 | 36 | 0/0 | 0/0 | 0/0 | match | match | match |
| 163383 | TruSeqV2    | 1:226033030 | synon    | G/G | 4.88E-15 | 12  | 33 | 15 | 30 | 0/0 | 0/0 | 0/0 | match | match | match |
| 198564 | Agilent38MB | 1:226033030 | synon    | G/G | 4.05E-13 | 38  | 90 | 16 | 39 | 0/0 | 0/0 | 0/0 | match | match | match |
| 108971 | TruSeqV2    | 1:46870761  | missense | C/C | 1.33E-15 | 99  | 99 | 24 | 57 | 0/0 | 0/0 | 0/0 | match | match | match |
| 115239 | TruSeqV2    | 1:46870761  | missense | C/C | 2.22E-16 | 66  | 99 | 21 | 39 | 0/0 | 0/0 | 0/0 | match | match | match |
| 132306 | Agilent38MB | 1:46870761  | missense | A/C | 8.88E-16 | 125 | 99 | 43 | 99 | 0/1 | 0/1 | 0/1 | match | match | match |
| 163383 | TruSeqV2    | 1:46870761  | missense | A/C | 1.11E-14 | 94  | 99 | 37 | 99 | 0/1 | 0/1 | 0/1 | match | match | match |
| 198564 | Agilent38MB | 1:46870761  | missense | A/A | 2.71E-14 | 269 | 99 | 47 | 99 | 1/1 | 1/1 | 1/1 | match | match | match |
| 108971 | TruSeqV2    | 1:46874804  | missense | A/A | 3.77E-15 | 198 | 99 | 39 | 99 | 0/0 | 0/0 | 0/0 | match | match | match |
| 115239 | TruSeqV2    | 1:46874804  | missense | A/A | 6.88E-15 | 142 | 99 | 16 | 39 | 0/0 | 0/0 | 0/0 | match | match | match |
| 132306 | Agilent38MB | 1:46874804  | missense | A/A | 4.44E-16 | 238 | 99 | 27 | 75 | 0/0 | 0/0 | 0/0 | match | match | match |
| 163383 | TruSeqV2    | 1:46874804  | missense | A/A | 6.00E-15 | 158 | 99 | 27 | 66 | 0/0 | 0/0 | 0/0 | match | match | match |
| 198564 | Agilent38MB | 1:46874804  | missense | A/A | 8.88E-16 | 423 | 99 | 39 | 99 | 0/0 | 0/0 | 0/0 | match | match | match |
| 108971 | TruSeqV2    | 1:47276819  | synon    | G/G | 3.77E-15 | 75  | 99 | 42 | 99 | 0/0 | 0/0 | 0/0 | match | match | match |
| 115239 | TruSeqV2    | 1:47276819  | synon    | G/G | 2.22E-16 | 42  | 99 | 31 | 90 | 0/0 | 0/0 | 0/0 | match | match | match |
| 132306 | Agilent38MB | 1:47276819  | synon    | G/G | 2.22E-16 | 66  | 99 | 38 | 93 | 0/0 | 0/0 | 0/0 | match | match | match |
| 163383 | TruSeqV2    | 1:47276819  | synon    | G/G | 2.44E-15 | 51  | 99 | 41 | 99 | 0/0 | 0/0 | 0/0 | match | match | match |
| 198564 | Agilent38MB | 1:47276819  | synon    | G/G | 1.24E-14 | 124 | 99 | 40 | 99 | 0/0 | 0/0 | 0/0 | match | match | match |
| 108971 | TruSeqV2    | 1:47279175  | missense | C/C | 3.77E-15 | 227 | 99 | 51 | 99 | 0/0 | 0/0 | 0/0 | match | match | match |
| 115239 | TruSeqV2    | 1:47279175  | missense | C/T | 4.44E-15 | 142 | 99 | 24 | 99 | 0/1 | 0/1 | 0/1 | match | match | match |
| 132306 | Agilent38MB | 1:47279175  | missense | C/T | 2.44E-15 | 84  | 99 | 42 | 99 | 0/1 | 0/1 | 0/1 | match | match | match |
| 163383 | TruSeqV2    | 1:47279175  | missense | C/C | 4.44E-15 | 152 | 99 | 42 | 99 | 0/0 | 0/0 | 0/0 | match | match | match |



|        |             |            |          |       |          |     |    |    |    |     |     |     |       |       |       |
|--------|-------------|------------|----------|-------|----------|-----|----|----|----|-----|-----|-----|-------|-------|-------|
| 198564 | Agilent38MB | 1:47279175 | missense | C/C   | 9.26E-14 | 172 | 99 | 54 | 99 | 0/0 | 0/0 | 0/0 | match | match | match |
| 108971 | TruSeqV2    | 1:47280747 | fs       | AT/AT | 1.11E-15 | 55  | 99 | 50 | 99 | 0/0 | 0/0 | 0/0 | match | match | match |
| 115239 | TruSeqV2    | 1:47280747 | fs       | AT/AT | 5.11E-15 | 55  | 99 | 50 | 99 | 0/0 | 0/0 | 0/0 | match | match | match |
| 132306 | Agilent38MB | 1:47280747 | fs       | AT/AT | 2.22E-15 | 55  | 99 | 50 | 99 | 0/0 | 0/0 | 0/0 | match | match | match |
| 163383 | TruSeqV2    | 1:47280747 | fs       | AT/AT | 1.55E-15 | 55  | 99 | 50 | 99 | 0/0 | 0/0 | 0/0 | match | match | match |
| 198564 | Agilent38MB | 1:47280747 | fs       | AT/AT | 4.88E-15 | 55  | 99 | 50 | 99 | 0/0 | 0/0 | 0/0 | match | match | match |
| 108971 | TruSeqV2    | 1:47280830 | missense | A/A   | 6.66E-16 | 94  | 99 | 39 | 99 | 0/0 | 0/0 | 0/0 | match | match | match |
| 115239 | TruSeqV2    | 1:47280830 | missense | A/A   | 4.82E-14 | 67  | 99 | 34 | 96 | 0/0 | 0/0 | 0/0 | match | match | match |
| 132306 | Agilent38MB | 1:47280830 | missense | A/A   | 6.66E-16 | 122 | 99 | 35 | 96 | 0/0 | 0/0 | 0/0 | match | match | match |
| 163383 | TruSeqV2    | 1:47280830 | missense | A/A   | 8.88E-16 | 104 | 99 | 42 | 99 | 0/0 | 0/0 | 0/0 | match | match | match |
| 198564 | Agilent38MB | 1:47280830 | missense | A/A   | 1.24E-14 | 208 | 99 | 45 | 99 | 0/0 | 0/0 | 0/0 | match | match | match |
| 108971 | TruSeqV2    | 1:47280859 | missense | G/G   | 3.55E-15 | 111 | 99 | 31 | 81 | 0/0 | 0/0 | 0/0 | match | match | match |
| 115239 | TruSeqV2    | 1:47280859 | missense | G/G   | 2.22E-15 | 68  | 99 | 34 | 17 | 0/0 | 0/0 | 0/0 | match | match | match |
| 132306 | Agilent38MB | 1:47280859 | missense | G/G   | 1.55E-15 | 111 | 99 | 31 | 78 | 0/0 | 0/0 | 0/0 | match | match | match |
| 163383 | TruSeqV2    | 1:47280859 | missense | G/G   | 2.44E-15 | 113 | 99 | 41 | 99 | 0/0 | 0/0 | 0/0 | match | match | match |
| 198564 | Agilent38MB | 1:47280859 | missense | G/G   | 8.22E-15 | 203 | 99 | 43 | 99 | 0/0 | 0/0 | 0/0 | match | match | match |
| 108971 | TruSeqV2    | 1:47280884 | missense | C/C   | 4.44E-16 | 108 | 99 | 30 | 69 | 0/0 | 0/0 | 0/0 | match | match | match |
| 115239 | TruSeqV2    | 1:47280884 | missense | C/C   | 4.44E-16 | 57  | 99 | 25 | 57 | 0/0 | 0/0 | 0/0 | match | match | match |
| 132306 | Agilent38MB | 1:47280884 | missense | C/C   | 4.44E-16 | 121 | 99 | 25 | 69 | 0/0 | 0/0 | 0/0 | match | match | match |
| 163383 | TruSeqV2    | 1:47280884 | missense | C/C   | 4.44E-16 | 100 | 99 | 42 | 99 | 0/0 | 0/0 | 0/0 | match | match | match |
| 198564 | Agilent38MB | 1:47280884 | missense | C/C   | 6.66E-16 | 220 | 99 | 37 | 99 | 0/0 | 0/0 | 0/0 | match | match | match |
| 108971 | TruSeqV2    | 1:47282772 | missense | C/C   | 5.35E-07 | 50  | 99 | 31 | 81 | 0/0 | 0/0 | 0/0 | match | match | match |
| 115239 | TruSeqV2    | 1:47282772 | missense | C/C   | 6.10E-11 | 38  | 99 | 21 | 42 | 0/0 | 0/0 | 0/0 | match | match | match |
| 132306 | Agilent38MB | 1:47282772 | missense | C/C   | 2.13E-06 | 218 | 99 | 25 | 54 | 0/0 | 0/0 | 0/0 | match | match | match |
| 163383 | TruSeqV2    | 1:47282772 | missense | C/C   | 1.54E-09 | 49  | 99 | 24 | 57 | 0/0 | 0/0 | 0/0 | match | match | match |
| 198564 | Agilent38MB | 1:47282772 | missense | C/C   | 3.85E-11 | 386 | 99 | 31 | 78 | 0/0 | 0/0 | 0/0 | match | match | match |
| 108971 | TruSeqV2    | 1:47395726 | 3'UTR    | T/T   | 3.11E-15 | 188 | 99 | 22 | 63 | 0/0 | 0/0 | 0/0 | match | match | match |
| 115239 | TruSeqV2    | 1:47395726 | 3'UTR    | T/T   | 8.88E-16 | 121 | 99 | 24 | 60 | 0/0 | 0/0 | 0/0 | match | match | match |
| 132306 | Agilent38MB | 1:47395726 | 3'UTR    | T/T   | 1.78E-15 | 13  | 39 | 28 | 78 | 0/0 | 0/0 | 0/0 | match | match | match |
| 163383 | TruSeqV2    | 1:47395726 | 3'UTR    | T/T   | 1.11E-15 | 151 | 99 | 33 | 84 | 0/0 | 0/0 | 0/0 | match | match | match |
| 198564 | Agilent38MB | 1:47395726 | 3'UTR    | T/T   | 3.55E-15 | 27  | 72 | 17 | 42 | 0/0 | 0/0 | 0/0 | match | match | match |
| 108971 | TruSeqV2    | 1:47403031 | intronic | A/A   | 2.22E-16 | 118 | 99 | 56 | 99 | 0/0 | 0/0 | 0/0 | match | match | match |
| 115239 | TruSeqV2    | 1:47403031 | intronic | A/A   | 4.44E-16 | 87  | 99 | 54 | 99 | 0/0 | 0/0 | 0/0 | match | match | match |
| 132306 | Agilent38MB | 1:47403031 | intronic | A/A   | 8.88E-16 | 123 | 99 | 42 | 99 | 0/0 | 0/0 | 0/0 | match | match | match |
| 163383 | TruSeqV2    | 1:47403031 | intronic | A/A   | 2.22E-16 | 105 | 99 | 45 | 99 | 0/0 | 0/0 | 0/0 | match | match | match |
| 198564 | Agilent38MB | 1:47403031 | intronic | A/A   | 4.44E-16 | 195 | 99 | 64 | 99 | 0/0 | 0/0 | 0/0 | match | match | match |
| 108971 | TruSeqV2    | 1:47407217 | promoter | G/G   | 3.55E-15 | 16  | 36 | 37 | 90 | 0/0 | 0/0 | 0/0 | match | match | match |
| 115239 | TruSeqV2    | 1:47407217 | promoter | G/G   | 4.44E-16 | 12  | 21 | 24 | 69 | 0/0 | 0/0 | 0/0 | match | match | match |

|        |             |            |          |     |             |     |    |    |    |     |     |     |       |       |       |
|--------|-------------|------------|----------|-----|-------------|-----|----|----|----|-----|-----|-----|-------|-------|-------|
| 132306 | Agilent38MB | 1:47407217 | promoter | G/G | 5.51E-14    | 3   | 9  | 34 | 99 | 0/0 | 0/0 | 0/0 | match | match | match |
| 163383 | TruSeqV2    | 1:47407217 | promoter | G/G | 1.62E-14    | 16  | 36 | 37 | 99 | 0/0 | 0/0 | 0/0 | match | match | match |
| 198564 | Agilent38MB | 1:47407217 | promoter | G/G | 7.46E-14    | 6   | 18 | 39 | 99 | 0/0 | 0/0 | 0/0 | match | match | match |
| 108971 | TruSeqV2    | 1:47571902 | synon    | C/C | 1.03E-09    | 220 | 99 | 28 | 78 | 0/0 | 0/0 | 0/0 | match | match | match |
| 132306 | Agilent38MB | 1:47571902 | synon    | C/C | 9.74E-10    | 215 | 99 | 25 | 72 | 0/0 | 0/0 | 0/0 | match | match | match |
| 163383 | TruSeqV2    | 1:47571902 | synon    | C/T | 1.53E-07    | 145 | 99 | 27 | 99 | 0/1 | 0/1 | 0/1 | match | match | match |
| 198564 | Agilent38MB | 1:47571902 | synon    | C/C | 0.000482841 | 403 | 99 | 29 | 81 | 0/0 | 0/0 | 0/0 | match | match | match |
| 108971 | TruSeqV2    | 1:60359335 | synon    | A/A | 2.22E-16    | 110 | 99 | 41 | 99 | 0/0 | 0/0 | 0/0 | match | match | match |
| 115239 | TruSeqV2    | 1:60359335 | synon    | A/A | 4.44E-16    | 68  | 99 | 35 | 81 | 0/0 | 0/0 | 0/0 | match | match | match |
| 132306 | Agilent38MB | 1:60359335 | synon    | A/A | 2.22E-16    | 38  | 99 | 30 | 81 | 0/0 | 0/0 | 0/0 | match | match | match |
| 163383 | TruSeqV2    | 1:60359335 | synon    | A/A | 2.22E-16    | 93  | 99 | 37 | 99 | 0/0 | 0/0 | 0/0 | match | match | match |
| 198564 | Agilent38MB | 1:60359335 | synon    | A/A | 3.11E-14    | 48  | 99 | 48 | 99 | 0/0 | 0/0 | 0/0 | match | match | match |
| 108971 | TruSeqV2    | 1:60366757 | missense | T/T | 2.22E-16    | 242 | 99 | 42 | 99 | 0/0 | 0/0 | 0/0 | match | match | match |
| 115239 | TruSeqV2    | 1:60366757 | missense | T/T | 2.22E-16    | 178 | 99 | 18 | 45 | 0/0 | 0/0 | 0/0 | match | match | match |
| 132306 | Agilent38MB | 1:60366757 | missense | T/T | 2.22E-16    | 124 | 99 | 26 | 60 | 0/0 | 0/0 | 0/0 | match | match | match |
| 163383 | TruSeqV2    | 1:60366757 | missense | T/T | 2.22E-16    | 210 | 99 | 40 | 99 | 0/0 | 0/0 | 0/0 | match | match | match |
| 198564 | Agilent38MB | 1:60366757 | missense | T/T | 4.44E-16    | 216 | 99 | 38 | 99 | 0/0 | 0/0 | 0/0 | match | match | match |
| 108971 | TruSeqV2    | 1:60370601 | missense | A/A | 2.22E-16    | 91  | 99 | 45 | 99 | 0/0 | 0/0 | 0/0 | match | match | match |
| 115239 | TruSeqV2    | 1:60370601 | missense | A/A | 2.22E-16    | 58  | 99 | 27 | 63 | 0/0 | 0/0 | 0/0 | match | match | match |
| 132306 | Agilent38MB | 1:60370601 | missense | A/A | 2.22E-16    | 88  | 99 | 39 | 99 | 0/0 | 0/0 | 0/0 | match | match | match |
| 163383 | TruSeqV2    | 1:60370601 | missense | A/A | 2.22E-16    | 93  | 99 | 26 | 69 | 0/0 | 0/0 | 0/0 | match | match | match |
| 198564 | Agilent38MB | 1:60370601 | missense | A/A | 2.22E-16    | 191 | 99 | 46 | 99 | 0/0 | 0/0 | 0/0 | match | match | match |
| 108971 | TruSeqV2    | 1:60370710 | missense | C/C | 9.55E-15    | 60  | 99 | 37 | 99 | 0/0 | 0/0 | 0/0 | match | match | match |
| 115239 | TruSeqV2    | 1:60370710 | missense | C/C | 1.11E-15    | 40  | 99 | 34 | 96 | 0/0 | 0/0 | 0/0 | match | match | match |
| 132306 | Agilent38MB | 1:60370710 | missense | C/C | 1.55E-15    | 27  | 46 | 44 | 99 | 0/0 | 0/0 | 0/0 | match | match | match |
| 163383 | TruSeqV2    | 1:60370710 | missense | C/C | 8.88E-15    | 60  | 99 | 42 | 99 | 0/0 | 0/0 | 0/0 | match | match | match |
| 198564 | Agilent38MB | 1:60370710 | missense | C/C | 4.64E-14    | 74  | 99 | 30 | 78 | 0/0 | 0/0 | 0/0 | match | match | match |
| 108971 | TruSeqV2    | 1:60377389 | missense | A/A | 4.44E-16    | 158 | 99 | 49 | 99 | 0/0 | 0/0 | 0/0 | match | match | match |
| 115239 | TruSeqV2    | 1:60377389 | missense | A/A | 2.22E-16    | 121 | 99 | 43 | 99 | 0/0 | 0/0 | 0/0 | match | match | match |
| 132306 | Agilent38MB | 1:60377389 | missense | A/A | 4.44E-15    | 259 | 99 | 36 | 93 | 0/0 | 0/0 | 0/0 | match | match | match |
| 163383 | TruSeqV2    | 1:60377389 | missense | A/A | 7.55E-15    | 154 | 99 | 46 | 99 | 0/0 | 0/0 | 0/0 | match | match | match |
| 198564 | Agilent38MB | 1:60377389 | missense | A/A | 9.32E-13    | 422 | 99 | 43 | 99 | 0/0 | 0/0 | 0/0 | match | match | match |
| 108971 | TruSeqV2    | 1:60377885 | missense | G/G | 4.44E-16    | 265 | 99 | 48 | 99 | 0/0 | 0/0 | 0/0 | match | match | match |
| 115239 | TruSeqV2    | 1:60377885 | missense | G/G | 6.66E-16    | 170 | 99 | 32 | 87 | 0/0 | 0/0 | 0/0 | match | match | match |
| 132306 | Agilent38MB | 1:60377885 | missense | G/G | 2.22E-16    | 83  | 99 | 27 | 78 | 0/0 | 0/0 | 0/0 | match | match | match |
| 163383 | TruSeqV2    | 1:60377885 | missense | G/G | 4.44E-16    | 193 | 99 | 44 | 99 | 0/0 | 0/0 | 0/0 | match | match | match |
| 198564 | Agilent38MB | 1:60377885 | missense | G/G | 4.44E-16    | 141 | 99 | 49 | 99 | 0/0 | 0/0 | 0/0 | match | match | match |
| 108971 | TruSeqV2    | 1:60377930 | missense | T/T | 6.66E-16    | 280 | 99 | 47 | 99 | 0/0 | 0/0 | 0/0 | match | match | match |

|        |             |            |          |     |          |     |    |    |    |     |     |     |       |       |       |
|--------|-------------|------------|----------|-----|----------|-----|----|----|----|-----|-----|-----|-------|-------|-------|
| 115239 | TruSeqV2    | 1:60377930 | missense | T/T | 2.22E-16 | 210 | 99 | 40 | 99 | 0/0 | 0/0 | 0/0 | match | match | match |
| 132306 | Agilent38MB | 1:60377930 | missense | T/T | 2.22E-16 | 203 | 99 | 35 | 99 | 0/0 | 0/0 | 0/0 | match | match | match |
| 163383 | TruSeqV2    | 1:60377930 | missense | T/T | 4.44E-16 | 243 | 99 | 40 | 99 | 0/0 | 0/0 | 0/0 | match | match | match |
| 198564 | Agilent38MB | 1:60377930 | missense | T/T | 2.22E-15 | 398 | 99 | 53 | 99 | 0/0 | 0/0 | 0/0 | match | match | match |
| 108971 | TruSeqV2    | 1:60381650 | synon    | G/G | 6.66E-16 | 159 | 99 | 43 | 99 | 0/0 | 0/0 | 0/0 | match | match | match |
| 115239 | TruSeqV2    | 1:60381650 | synon    | G/G | 8.88E-16 | 104 | 99 | 30 | 72 | 0/0 | 0/0 | 0/0 | match | match | match |
| 132306 | Agilent38MB | 1:60381650 | synon    | G/G | 2.22E-16 | 158 | 99 | 27 | 78 | 0/0 | 0/0 | 0/0 | match | match | match |
| 163383 | TruSeqV2    | 1:60381650 | synon    | G/G | 4.44E-16 | 160 | 99 | 34 | 96 | 0/0 | 0/0 | 0/0 | match | match | match |
| 198564 | Agilent38MB | 1:60381650 | synon    | G/G | 8.88E-16 | 317 | 99 | 40 | 99 | 0/0 | 0/0 | 0/0 | match | match | match |
| 108971 | TruSeqV2    | 1:60392494 | promoter | C/C | 2.11E-08 | 5   | 0  | 19 | 36 | 0/0 | 0/0 | 0/0 | match | match | match |
| 115239 | TruSeqV2    | 1:60392494 | promoter | C/C | 2.53E-08 | 7   | 9  | 3  | 6  | 0/0 | 0/0 | 0/0 | match | match | match |
| 132306 | Agilent38MB | 1:60392494 | promoter | C/C | 1.23E-13 | 2   | 6  | 11 | 33 | 0/0 | 0/0 | 0/0 | match | match | match |
| 198564 | Agilent38MB | 1:60392494 | promoter | C/C | 1.84E-14 | 2   | 3  | 41 | 90 | 0/0 | 0/0 | 0/0 | match | match | match |
| 108971 | TruSeqV2    | 1:97544627 | missense | C/C | 2.22E-16 | 327 | 99 | 40 | 99 | 0/0 | 0/0 | 0/0 | match | match | match |
| 115239 | TruSeqV2    | 1:97544627 | missense | C/C | 2.22E-16 | 248 | 99 | 26 | 63 | 0/0 | 0/0 | 0/0 | match | match | match |
| 132306 | Agilent38MB | 1:97544627 | missense | C/C | 2.22E-16 | 324 | 99 | 36 | 87 | 0/0 | 0/0 | 0/0 | match | match | match |
| 163383 | TruSeqV2    | 1:97544627 | missense | C/C | 2.22E-16 | 297 | 99 | 46 | 99 | 0/0 | 0/0 | 0/0 | match | match | match |
| 198564 | Agilent38MB | 1:97544627 | missense | C/C | 4.44E-16 | 532 | 99 | 43 | 99 | 0/0 | 0/0 | 0/0 | match | match | match |
| 108971 | TruSeqV2    | 1:97564154 | missense | C/C | 2.36E-13 | 115 | 99 | 29 | 81 | 0/0 | 0/0 | 0/0 | match | match | match |
| 115239 | TruSeqV2    | 1:97564154 | missense | C/C | 3.94E-13 | 65  | 99 | 29 | 84 | 0/0 | 0/0 | 0/0 | match | match | match |
| 132306 | Agilent38MB | 1:97564154 | missense | C/C | 3.33E-15 | 44  | 99 | 41 | 99 | 0/0 | 0/0 | 0/0 | match | match | match |
| 163383 | TruSeqV2    | 1:97564154 | missense | C/C | 6.86E-14 | 106 | 99 | 47 | 99 | 0/0 | 0/0 | 0/0 | match | match | match |
| 198564 | Agilent38MB | 1:97564154 | missense | C/C | 4.70E-11 | 95  | 99 | 57 | 99 | 0/0 | 0/0 | 0/0 | match | match | match |
| 108971 | TruSeqV2    | 1:97915614 | splice   | C/C | 5.76E-13 | 41  | 99 | 60 | 99 | 0/0 | 0/0 | 0/0 | match | match | match |
| 115239 | TruSeqV2    | 1:97915614 | splice   | C/C | 3.08E-10 | 31  | 84 | 42 | 99 | 0/0 | 0/0 | 0/0 | match | match | match |
| 132306 | Agilent38MB | 1:97915614 | splice   | C/C | 1.36E-13 | 225 | 99 | 33 | 75 | 0/0 | 0/0 | 0/0 | match | match | match |
| 163383 | TruSeqV2    | 1:97915614 | splice   | C/C | 1.71E-11 | 62  | 99 | 45 | 99 | 0/0 | 0/0 | 0/0 | match | match | match |
| 198564 | Agilent38MB | 1:97915614 | splice   | C/C | 2.45E-12 | 357 | 99 | 59 | 99 | 0/0 | 0/0 | 0/0 | match | match | match |
| 108971 | TruSeqV2    | 1:97915615 | synon    | G/G | 4.44E-16 | 41  | 99 | 60 | 99 | 0/0 | 0/0 | 0/0 | match | match | match |
| 115239 | TruSeqV2    | 1:97915615 | synon    | G/G | 2.22E-16 | 32  | 90 | 42 | 99 | 0/0 | 0/0 | 0/0 | match | match | match |
| 132306 | Agilent38MB | 1:97915615 | synon    | G/G | 2.22E-16 | 230 | 99 | 33 | 78 | 0/0 | 0/0 | 0/0 | match | match | match |
| 163383 | TruSeqV2    | 1:97915615 | synon    | G/G | 2.22E-16 | 63  | 99 | 43 | 99 | 0/0 | 0/0 | 0/0 | match | match | match |
| 198564 | Agilent38MB | 1:97915615 | synon    | G/G | 3.55E-15 | 373 | 99 | 61 | 99 | 0/0 | 0/0 | 0/0 | match | match | match |
| 108971 | TruSeqV2    | 1:97915622 | fs       | C/C | 8.88E-16 | 43  | 99 | 61 | 99 | 0/0 | 0/0 | 0/0 | match | match | match |
| 115239 | TruSeqV2    | 1:97915622 | fs       | C/C | 6.66E-16 | 43  | 99 | 61 | 99 | 0/0 | 0/0 | 0/0 | match | match | match |
| 132306 | Agilent38MB | 1:97915622 | fs       | C/C | 1.15E-14 | 43  | 99 | 61 | 99 | 0/0 | 0/0 | 0/0 | match | match | match |
| 163383 | TruSeqV2    | 1:97915622 | fs       | C/C | 8.88E-16 | 43  | 99 | 61 | 99 | 0/0 | 0/0 | 0/0 | match | match | match |
| 198564 | Agilent38MB | 1:97915622 | fs       | C/C | 1.72E-13 | 43  | 99 | 61 | 99 | 0/0 | 0/0 | 0/0 | match | match | match |

|        |             |            |          |     |          |     |    |    |    |     |     |     |       |       |       |
|--------|-------------|------------|----------|-----|----------|-----|----|----|----|-----|-----|-----|-------|-------|-------|
| 108971 | TruSeqV2    | 1:97915624 | synon    | A/A | 1.11E-15 | 46  | 99 | 60 | 99 | 0/0 | 0/0 | 0/0 | match | match | match |
| 115239 | TruSeqV2    | 1:97915624 | synon    | A/A | 2.22E-16 | 33  | 90 | 42 | 99 | 0/0 | 0/0 | 0/0 | match | match | match |
| 132306 | Agilent38MB | 1:97915624 | synon    | A/A | 4.00E-15 | 262 | 99 | 30 | 78 | 0/0 | 0/0 | 0/0 | match | match | match |
| 163383 | TruSeqV2    | 1:97915624 | synon    | A/A | 8.88E-16 | 63  | 99 | 48 | 99 | 0/0 | 0/0 | 0/0 | match | match | match |
| 198564 | Agilent38MB | 1:97915624 | synon    | G/A | 1.11E-15 | 406 | 99 | 60 | 99 | 0/1 | 0/1 | 0/1 | match | match | match |
| 108971 | TruSeqV2    | 1:97981343 | missense | A/A | 2.22E-16 | 78  | 99 | 53 | 99 | 0/0 | 0/0 | 0/0 | match | match | match |
| 115239 | TruSeqV2    | 1:97981343 | missense | A/A | 2.22E-16 | 63  | 99 | 48 | 99 | 0/0 | 0/0 | 0/0 | match | match | match |
| 132306 | Agilent38MB | 1:97981343 | missense | A/A | 2.22E-16 | 138 | 99 | 45 | 99 | 0/0 | 0/0 | 0/0 | match | match | match |
| 163383 | TruSeqV2    | 1:97981343 | missense | A/A | 2.22E-16 | 91  | 99 | 46 | 99 | 0/0 | 0/0 | 0/0 | match | match | match |
| 198564 | Agilent38MB | 1:97981343 | missense | A/A | 2.22E-16 | 168 | 99 | 37 | 99 | 0/0 | 0/0 | 0/0 | match | match | match |
| 108971 | TruSeqV2    | 1:97981421 | missense | C/C | 1.78E-15 | 77  | 99 | 49 | 99 | 0/0 | 0/0 | 0/0 | match | match | match |
| 115239 | TruSeqV2    | 1:97981421 | missense | C/C | 1.11E-15 | 62  | 99 | 39 | 99 | 0/0 | 0/0 | 0/0 | match | match | match |
| 132306 | Agilent38MB | 1:97981421 | missense | C/C | 1.95E-14 | 131 | 99 | 35 | 90 | 0/0 | 0/0 | 0/0 | match | match | match |
| 163383 | TruSeqV2    | 1:97981421 | missense | C/C | 3.64E-14 | 93  | 99 | 40 | 99 | 0/0 | 0/0 | 0/0 | match | match | match |
| 198564 | Agilent38MB | 1:97981421 | missense | C/C | 1.11E-15 | 149 | 99 | 42 | 99 | 0/0 | 0/0 | 0/0 | match | match | match |
| 108971 | TruSeqV2    | 1:98058828 | synon    | A/A | 8.88E-16 | 161 | 99 | 36 | 87 | 0/0 | 0/0 | 0/0 | match | match | match |
| 115239 | TruSeqV2    | 1:98058828 | synon    | A/A | 2.22E-16 | 108 | 99 | 29 | 69 | 0/0 | 0/0 | 0/0 | match | match | match |
| 132306 | Agilent38MB | 1:98058828 | synon    | A/A | 4.44E-16 | 274 | 99 | 27 | 78 | 0/0 | 0/0 | 0/0 | match | match | match |
| 163383 | TruSeqV2    | 1:98058828 | synon    | A/A | 2.22E-16 | 147 | 99 | 44 | 99 | 0/0 | 0/0 | 0/0 | match | match | match |
| 198564 | Agilent38MB | 1:98058828 | synon    | A/A | 1.55E-15 | 557 | 99 | 41 | 99 | 0/0 | 0/0 | 0/0 | match | match | match |
| 108971 | TruSeqV2    | 1:98058867 | synon    | A/A | 2.22E-16 | 194 | 99 | 33 | 93 | 0/0 | 0/0 | 0/0 | match | match | match |
| 115239 | TruSeqV2    | 1:98058867 | synon    | A/A | 2.22E-16 | 116 | 99 | 29 | 81 | 0/0 | 0/0 | 0/0 | match | match | match |
| 132306 | Agilent38MB | 1:98058867 | synon    | A/A | 2.22E-16 | 221 | 99 | 33 | 93 | 0/0 | 0/0 | 0/0 | match | match | match |
| 163383 | TruSeqV2    | 1:98058867 | synon    | A/A | 2.22E-16 | 161 | 99 | 40 | 99 | 0/0 | 0/0 | 0/0 | match | match | match |
| 198564 | Agilent38MB | 1:98058867 | synon    | A/A | 6.66E-16 | 425 | 99 | 55 | 99 | 0/0 | 0/0 | 0/0 | match | match | match |
| 108971 | TruSeqV2    | 1:98058899 | missense | C/C | 2.22E-16 | 172 | 99 | 39 | 99 | 0/0 | 0/0 | 0/0 | match | match | match |
| 115239 | TruSeqV2    | 1:98058899 | missense | C/C | 2.22E-16 | 104 | 99 | 38 | 99 | 0/0 | 0/0 | 0/0 | match | match | match |
| 132306 | Agilent38MB | 1:98058899 | missense | C/C | 2.22E-16 | 207 | 99 | 33 | 90 | 0/0 | 0/0 | 0/0 | match | match | match |
| 163383 | TruSeqV2    | 1:98058899 | missense | C/C | 2.22E-16 | 139 | 99 | 45 | 99 | 0/0 | 0/0 | 0/0 | match | match | match |
| 198564 | Agilent38MB | 1:98058899 | missense | C/C | 2.22E-16 | 440 | 99 | 53 | 99 | 0/0 | 0/0 | 0/0 | match | match | match |
| 108971 | TruSeqV2    | 1:98157279 | synon    | A/A | 6.66E-16 | 55  | 99 | 51 | 99 | 0/0 | 0/0 | 0/0 | match | match | match |
| 115239 | TruSeqV2    | 1:98157279 | synon    | A/A | 4.44E-16 | 53  | 99 | 35 | 99 | 0/0 | 0/0 | 0/0 | match | match | match |
| 132306 | Agilent38MB | 1:98157279 | synon    | A/A | 2.44E-15 | 119 | 99 | 35 | 99 | 0/0 | 0/0 | 0/0 | match | match | match |
| 163383 | TruSeqV2    | 1:98157279 | synon    | A/A | 4.44E-16 | 57  | 99 | 37 | 90 | 0/0 | 0/0 | 0/0 | match | match | match |
| 198564 | Agilent38MB | 1:98157279 | synon    | A/A | 6.66E-16 | 216 | 99 | 49 | 99 | 0/0 | 0/0 | 0/0 | match | match | match |
| 108971 | TruSeqV2    | 1:98157332 | missense | G/G | 1.33E-15 | 49  | 99 | 50 | 99 | 0/0 | 0/0 | 0/0 | match | match | match |
| 115239 | TruSeqV2    | 1:98157332 | missense | G/G | 4.44E-16 | 43  | 99 | 33 | 90 | 0/0 | 0/0 | 0/0 | match | match | match |
| 132306 | Agilent38MB | 1:98157332 | missense | G/G | 6.66E-16 | 125 | 99 | 30 | 84 | 0/0 | 0/0 | 0/0 | match | match | match |

|        |             |              |          |          |          |     |    |    |    |     |     |     |       |       |       |
|--------|-------------|--------------|----------|----------|----------|-----|----|----|----|-----|-----|-----|-------|-------|-------|
| 163383 | TruSeqV2    | 1:98157332   | missense | G/G      | 8.88E-16 | 55  | 99 | 45 | 89 | 0/0 | 0/0 | 0/0 | match | match | match |
| 198564 | Agilent38MB | 1:98157332   | missense | G/G      | 1.11E-15 | 240 | 99 | 53 | 99 | 0/0 | 0/0 | 0/0 | match | match | match |
| 108971 | TruSeqV2    | 1:98165062   | synon    | C/C      | 2.44E-15 | 101 | 99 | 40 | 99 | 0/0 | 0/0 | 0/0 | match | match | match |
| 115239 | TruSeqV2    | 1:98165062   | synon    | C/C      | 1.11E-15 | 82  | 99 | 42 | 99 | 0/0 | 0/0 | 0/0 | match | match | match |
| 132306 | Agilent38MB | 1:98165062   | synon    | C/C      | 4.44E-16 | 243 | 99 | 44 | 99 | 0/0 | 0/0 | 0/0 | match | match | match |
| 163383 | TruSeqV2    | 1:98165062   | synon    | C/C      | 4.44E-16 | 111 | 99 | 30 | 89 | 0/0 | 0/0 | 0/0 | match | match | match |
| 198564 | Agilent38MB | 1:98165062   | synon    | C/C      | 2.07E-14 | 418 | 99 | 36 | 87 | 0/0 | 0/0 | 0/0 | match | match | match |
| 108971 | TruSeqV2    | 1:98165091   | missense | T/C      | 2.53E-14 | 77  | 99 | 41 | 99 | 0/1 | 0/1 | 0/1 | match | match | match |
| 115239 | TruSeqV2    | 1:98165091   | missense | T/T      | 1.11E-15 | 64  | 99 | 41 | 99 | 0/0 | 0/0 | 0/0 | match | match | match |
| 132306 | Agilent38MB | 1:98165091   | missense | T/T      | 4.44E-16 | 174 | 99 | 48 | 99 | 0/0 | 0/0 | 0/0 | match | match | match |
| 163383 | TruSeqV2    | 1:98165091   | missense | T/T      | 4.44E-16 | 89  | 99 | 36 | 96 | 0/0 | 0/0 | 0/0 | match | match | match |
| 198564 | Agilent38MB | 1:98165091   | missense | T/T      | 2.22E-16 | 301 | 99 | 40 | 99 | 0/0 | 0/0 | 0/0 | match | match | match |
|        |             |              |          | TCAT/TCA |          |     |    |    |    |     |     |     |       |       |       |
| 108971 | TruSeqV2    | 1:98205971   | missense | T        | 4.44E-16 | 48  | 99 | 37 | 96 | 0/0 | 0/0 | 0/0 | match | match | match |
|        |             |              |          | TCAT/TCA |          |     |    |    |    |     |     |     |       |       |       |
| 115239 | TruSeqV2    | 1:98205971   | missense | T        | 4.44E-16 | 48  | 99 | 37 | 96 | 0/0 | 0/0 | 0/0 | match | match | match |
|        |             |              |          | TCAT/TCA |          |     |    |    |    |     |     |     |       |       |       |
| 132306 | Agilent38MB | 1:98205971   | missense | T        | 4.44E-16 | 48  | 99 | 37 | 96 | 0/0 | 0/0 | 0/0 | match | match | match |
|        |             |              |          | TCAT/TCA |          |     |    |    |    |     |     |     |       |       |       |
| 163383 | TruSeqV2    | 1:98205971   | missense | T        | 6.66E-16 | 48  | 99 | 37 | 96 | 0/0 | 0/0 | 0/0 | match | match | match |
|        |             |              |          | TCAT/TCA |          |     |    |    |    |     |     |     |       |       |       |
| 198564 | Agilent38MB | 1:98205971   | missense | T        | 1.11E-15 | 48  | 99 | 37 | 96 | 0/0 | 0/0 | 0/0 | match | match | match |
| 108971 | TruSeqV2    | 1:98348885   | missense | G/A      | 2.66E-15 | 67  | 99 | 31 | 99 | 0/1 | 0/1 | 0/1 | match | match | match |
| 115239 | TruSeqV2    | 1:98348885   | missense | A/A      | 4.44E-16 | 55  | 99 | 38 | 99 | 1/1 | 1/1 | 1/1 | match | match | match |
| 132306 | Agilent38MB | 1:98348885   | missense | A/A      | 8.88E-16 | 131 | 99 | 33 | 99 | 1/1 | 1/1 | 1/1 | match | match | match |
| 163383 | TruSeqV2    | 1:98348885   | missense | A/A      | 4.44E-16 | 64  | 99 | 30 | 90 | 1/1 | 1/1 | 1/1 | match | match | match |
| 198564 | Agilent38MB | 1:98348885   | missense | G/A      | 6.66E-16 | 270 | 99 | 29 | 99 | 0/1 | 0/1 | 0/1 | match | match | match |
| 108971 | TruSeqV2    | 1:98348909   | stop     | G/G      | 2.22E-16 | 71  | 99 | 39 | 99 | 0/0 | 0/0 | 0/0 | match | match | match |
| 115239 | TruSeqV2    | 1:98348909   | stop     | G/G      | 2.22E-16 | 53  | 99 | 43 | 99 | 0/0 | 0/0 | 0/0 | match | match | match |
| 132306 | Agilent38MB | 1:98348909   | stop     | G/G      | 2.22E-16 | 106 | 99 | 38 | 99 | 0/0 | 0/0 | 0/0 | match | match | match |
| 163383 | TruSeqV2    | 1:98348909   | stop     | G/G      | 4.44E-16 | 69  | 99 | 36 | 90 | 0/0 | 0/0 | 0/0 | match | match | match |
| 198564 | Agilent38MB | 1:98348909   | stop     | G/G      | 6.66E-16 | 227 | 99 | 38 | 99 | 0/0 | 0/0 | 0/0 | match | match | match |
| 108971 | TruSeqV2    | 10:101542578 | 5'UTR    | C/C      | 1.33E-15 | 138 | 99 | 33 | 84 | 0/0 | 0/0 | 0/0 | match | match | match |
| 115239 | TruSeqV2    | 10:101542578 | 5'UTR    | C/C      | 6.66E-16 | 73  | 99 | 54 | 99 | 0/0 | 0/0 | 0/0 | match | match | match |
| 132306 | Agilent38MB | 10:101542578 | 5'UTR    | C/T      | 5.77E-15 | 27  | 99 | 30 | 99 | 0/1 | 0/1 | 0/1 | match | match | match |
| 163383 | TruSeqV2    | 10:101542578 | 5'UTR    | C/C      | 8.88E-16 | 104 | 99 | 43 | 99 | 0/0 | 0/0 | 0/0 | match | match | match |
| 198564 | Agilent38MB | 10:101542578 | 5'UTR    | C/C      | 1.78E-15 | 76  | 99 | 56 | 99 | 0/0 | 0/0 | 0/0 | match | match | match |
| 108971 | TruSeqV2    | 10:101542579 | 5'UTR    | G/G      | 3.55E-15 | 136 | 99 | 33 | 84 | 0/0 | 0/0 | 0/0 | match | match | match |

|        |             |              |          |     |          |      |    |    |    |     |     |     |       |       |       |
|--------|-------------|--------------|----------|-----|----------|------|----|----|----|-----|-----|-----|-------|-------|-------|
| 115239 | TruSeqV2    | 10:101542579 | 5'UTR    | G/G | 4.00E-15 | 73   | 99 | 54 | 99 | 0/0 | 0/0 | 0/0 | match | match | match |
| 132306 | Agilent38MB | 10:101542579 | 5'UTR    | G/G | 3.77E-15 | 31   | 87 | 32 | 84 | 0/0 | 0/0 | 0/0 | match | match | match |
| 163383 | TruSeqV2    | 10:101542579 | 5'UTR    | G/G | 2.00E-15 | 101  | 99 | 42 | 99 | 0/0 | 0/0 | 0/0 | match | match | match |
| 198564 | Agilent38MB | 10:101542579 | 5'UTR    | G/G | 5.24E-13 | 80   | 99 | 56 | 99 | 0/0 | 0/0 | 0/0 | match | match | match |
| 108971 | TruSeqV2    | 10:101544447 | missense | T/T | 2.00E-15 | 183  | 99 | 46 | 99 | 1/1 | 1/1 | 1/1 | match | match | match |
| 115239 | TruSeqV2    | 10:101544447 | missense | T/T | 6.66E-16 | 147  | 99 | 28 | 83 | 1/1 | 1/1 | 1/1 | match | match | match |
| 132306 | Agilent38MB | 10:101544447 | missense | T/T | 1.11E-14 | 167  | 99 | 23 | 69 | 1/1 | 1/1 | 1/1 | match | match | match |
| 163383 | TruSeqV2    | 10:101544447 | missense | T/T | 4.44E-16 | 154  | 99 | 47 | 99 | 1/1 | 1/1 | 1/1 | match | match | match |
| 198564 | Agilent38MB | 10:101544447 | missense | T/T | 2.89E-15 | 271  | 99 | 37 | 99 | 1/1 | 1/1 | 1/1 | match | match | match |
| 108971 | TruSeqV2    | 10:101544490 | missense | A/A | 2.22E-16 | 182  | 99 | 40 | 99 | 0/0 | 0/0 | 0/0 | match | match | match |
| 115239 | TruSeqV2    | 10:101544490 | missense | A/A | 1.33E-15 | 146  | 99 | 29 | 78 | 0/0 | 0/0 | 0/0 | match | match | match |
| 132306 | Agilent38MB | 10:101544490 | missense | A/A | 1.11E-15 | 147  | 99 | 23 | 57 | 0/0 | 0/0 | 0/0 | match | match | match |
| 163383 | TruSeqV2    | 10:101544490 | missense | A/A | 4.44E-16 | 135  | 99 | 56 | 99 | 0/0 | 0/0 | 0/0 | match | match | match |
| 198564 | Agilent38MB | 10:101544490 | missense | A/A | 4.44E-16 | 227  | 99 | 33 | 93 | 0/0 | 0/0 | 0/0 | match | match | match |
| 108971 | TruSeqV2    | 10:101556957 | missense | A/A | 1.33E-15 | 201  | 99 | 45 | 99 | 0/0 | 0/0 | 0/0 | match | match | match |
| 115239 | TruSeqV2    | 10:101556957 | missense | A/A | 1.11E-15 | 148  | 99 | 34 | 90 | 0/0 | 0/0 | 0/0 | match | match | match |
| 132306 | Agilent38MB | 10:101556957 | missense | A/A | 6.66E-16 | 83   | 99 | 48 | 99 | 0/0 | 0/0 | 0/0 | match | match | match |
| 163383 | TruSeqV2    | 10:101556957 | missense | A/A | 4.22E-15 | 158  | 99 | 39 | 99 | 0/0 | 0/0 | 0/0 | match | match | match |
| 198564 | Agilent38MB | 10:101556957 | missense | A/A | 3.11E-15 | 149  | 99 | 51 | 99 | 0/0 | 0/0 | 0/0 | match | match | match |
| 108971 | TruSeqV2    | 10:101559094 | missense | A/A | 1.33E-15 | 40   | 99 | 36 | 99 | 0/0 | 0/0 | 0/0 | match | match | match |
| 115239 | TruSeqV2    | 10:101559094 | missense | A/A | 4.44E-16 | 17   | 39 | 35 | 84 | 0/0 | 0/0 | 0/0 | match | match | match |
| 132306 | Agilent38MB | 10:101559094 | missense | A/A | 2.89E-15 | 29   | 78 | 21 | 54 | 0/0 | 0/0 | 0/0 | match | match | match |
| 163383 | TruSeqV2    | 10:101559094 | missense | A/A | 3.11E-15 | 19   | 36 | 35 | 90 | 0/0 | 0/0 | 0/0 | match | match | match |
| 198564 | Agilent38MB | 10:101559094 | missense | A/A | 6.66E-16 | 57   | 99 | 42 | 99 | 0/0 | 0/0 | 0/0 | match | match | match |
| 108971 | TruSeqV2    | 10:101560169 | missense | G/G | 4.44E-16 | 77   | 99 | 42 | 99 | 0/0 | 0/0 | 0/0 | match | match | match |
| 115239 | TruSeqV2    | 10:101560169 | missense | A/G | 1.22E-14 | 43   | 99 | 39 | 99 | 0/1 | 0/1 | 0/1 | match | match | match |
| 132306 | Agilent38MB | 10:101560169 | missense | G/G | 4.44E-16 | 683  | 99 | 22 | 57 | 0/0 | 0/0 | 0/0 | match | match | match |
| 163383 | TruSeqV2    | 10:101560169 | missense | G/G | 2.22E-16 | 73   | 99 | 47 | 99 | 0/0 | 0/0 | 0/0 | match | match | match |
| 198564 | Agilent38MB | 10:101560169 | missense | G/G | 1.11E-15 | 1295 | 99 | 42 | 99 | 0/0 | 0/0 | 0/0 | match | match | match |
| 108971 | TruSeqV2    | 10:101563785 | missense | C/C | 4.44E-16 | 57   | 99 | 37 | 99 | 0/0 | 0/0 | 0/0 | match | match | match |
| 115239 | TruSeqV2    | 10:101563785 | missense | C/C | 4.44E-16 | 36   | 96 | 52 | 99 | 0/0 | 0/0 | 0/0 | match | match | match |
| 132306 | Agilent38MB | 10:101563785 | missense | C/C | 6.66E-16 | 156  | 99 | 41 | 93 | 0/0 | 0/0 | 0/0 | match | match | match |
| 163383 | TruSeqV2    | 10:101563785 | missense | C/C | 4.44E-16 | 58   | 99 | 49 | 99 | 0/0 | 0/0 | 0/0 | match | match | match |
| 198564 | Agilent38MB | 10:101563785 | missense | C/C | 4.44E-16 | 328  | 99 | 50 | 99 | 0/0 | 0/0 | 0/0 | match | match | match |
| 108971 | TruSeqV2    | 10:101563815 | missense | G/G | 4.44E-15 | 80   | 99 | 44 | 99 | 0/0 | 0/0 | 0/0 | match | match | match |
| 115239 | TruSeqV2    | 10:101563815 | missense | A/G | 3.11E-15 | 51   | 99 | 47 | 99 | 0/1 | 0/1 | 0/1 | match | match | match |
| 132306 | Agilent38MB | 10:101563815 | missense | G/G | 3.55E-15 | 166  | 99 | 35 | 90 | 0/0 | 0/0 | 0/0 | match | match | match |
| 163383 | TruSeqV2    | 10:101563815 | missense | G/G | 4.44E-15 | 70   | 99 | 50 | 99 | 0/0 | 0/0 | 0/0 | match | match | match |

|        |             |              |          |     |          |     |     |    |    |     |     |     |       |       |       |       |
|--------|-------------|--------------|----------|-----|----------|-----|-----|----|----|-----|-----|-----|-------|-------|-------|-------|
| 198564 | Agilent38MB | 10:101563815 | missense | A/G | 3.74E-13 | 352 | 99  | 44 | 99 | 0/1 | 0/1 | 0/1 | match | match | match |       |
| 108971 | TruSeqV2    | 10:101564000 | synon    | G/G | 4.44E-16 | 116 | 99  | 44 | 99 | 0/0 | 0/0 | 0/0 | match | match | match |       |
| 115239 | TruSeqV2    | 10:101564000 | synon    | G/G | 2.22E-16 | 69  | 99  | 37 | 99 | 0/0 | 0/0 | 0/0 | match | match | match |       |
| 132306 | Agilent38MB | 10:101564000 | synon    | G/G | 4.44E-16 | 120 | 99  | 42 | 99 | 0/0 | 0/0 | 0/0 | match | match | match |       |
| 163383 | TruSeqV2    | 10:101564000 | synon    | G/G | 2.22E-16 | 79  | 99  | 41 | 99 | 0/0 | 0/0 | 0/0 | match | match | match |       |
| 198564 | Agilent38MB | 10:101564000 | synon    | G/G | 2.22E-16 | 261 | 99  | 49 | 99 | 0/0 | 0/0 | 0/0 | match | match | match |       |
| 108971 | TruSeqV2    | 10:101564023 | missense | C/C | 6.66E-16 | 94  | 99  | 41 | 99 | 0/0 | 0/0 | 0/0 | match | match | match |       |
| 115239 | TruSeqV2    | 10:101564023 | missense | C/C | 3.33E-15 | 51  | 99  | 40 | 99 | 0/0 | 0/0 | 0/0 | match | match | match |       |
| 132306 | Agilent38MB | 10:101564023 | missense | C/C | 1.33E-15 | 125 | 99  | 45 | 99 | 0/0 | 0/0 | 0/0 | match | match | match |       |
| 163383 | TruSeqV2    | 10:101564023 | missense | C/C | 1.78E-15 | 71  | 99  | 40 | 99 | 0/0 | 0/0 | 0/0 | match | match | match |       |
| 198564 | Agilent38MB | 10:101564023 | missense | C/C | 2.66E-15 | 248 | 99  | 47 | 99 | 0/0 | 0/0 | 0/0 | match | match | match |       |
| 108971 | TruSeqV2    | 10:101565157 | missense | A/A | 6.66E-16 | 137 | 99  | 62 | 99 | 0/0 | 0/0 | 0/0 | match | match | match |       |
| 115239 | TruSeqV2    | 10:101565157 | missense | A/A | 4.44E-16 | 108 | 99  | 41 | 99 | 0/0 | 0/0 | 0/0 | match | match | match |       |
| 132306 | Agilent38MB | 10:101565157 | missense | A/A | 8.88E-16 | 69  | 99  | 30 | 67 | 0/0 | 0/0 | 0/0 | match | match | match |       |
| 163383 | TruSeqV2    | 10:101565157 | missense | A/A | 4.44E-16 | 120 | 99  | 34 | 84 | 0/0 | 0/0 | 0/0 | match | match | match |       |
| 198564 | Agilent38MB | 10:101565157 | missense | A/A | 4.44E-16 | 113 | 99  | 30 | 84 | 0/0 | 0/0 | 0/0 | match | match | match |       |
| 108971 | TruSeqV2    | 10:101567857 | missense | T/T | 6.66E-16 | 166 | 99  | 36 | 99 | 0/0 | 0/0 | 0/0 | match | match | match |       |
| 115239 | TruSeqV2    | 10:101567857 | missense | T/T | 2.22E-16 | 133 | 99  | 58 | 99 | 0/0 | 0/0 | 0/0 | match | match | match |       |
| 132306 | Agilent38MB | 10:101567857 | missense | T/T | 4.44E-16 | 300 | 99  | 45 | 99 | 0/0 | 0/0 | 0/0 | match | match | match |       |
| 163383 | TruSeqV2    | 10:101567857 | missense | T/T | 2.22E-16 | 145 | 99  | 42 | 99 | 0/0 | 0/0 | 0/0 | match | match | match |       |
| 198564 | Agilent38MB | 10:101567857 | missense | T/T | 4.44E-16 | 554 | 99  | 53 | 99 | 0/0 | 0/0 | 0/0 | match | match | match |       |
| 108971 | TruSeqV2    | 10:101567974 | fs       | -/- |          | 0   | 261 | 99 | 40 | 99  | 0/0 | 0/0 | 0/0   | match | match | match |
| 115239 | TruSeqV2    | 10:101567974 | fs       | -/- |          | 0   | 261 | 99 | 40 | 99  | 0/0 | 0/0 | 0/0   | match | match | match |
| 132306 | Agilent38MB | 10:101567974 | fs       | -/- |          | 0   | 261 | 99 | 40 | 99  | 0/0 | 0/0 | 0/0   | match | match | match |
| 163383 | TruSeqV2    | 10:101567974 | fs       | -/- |          | 0   | 261 | 99 | 40 | 99  | 0/0 | 0/0 | 0/0   | match | match | match |
| 198564 | Agilent38MB | 10:101567974 | fs       | -/- |          | 0   | 261 | 99 | 40 | 99  | 0/0 | 0/0 | 0/0   | match | match | match |
| 108971 | TruSeqV2    | 10:101572816 | missense | T/T | 2.22E-16 | 182 | 99  | 28 | 75 | 0/0 | 0/0 | 0/0 | match | match | match |       |
| 115239 | TruSeqV2    | 10:101572816 | missense | T/T | 2.22E-16 | 128 | 99  | 22 | 57 | 0/0 | 0/0 | 0/0 | match | match | match |       |
| 132306 | Agilent38MB | 10:101572816 | missense | T/T | 4.44E-16 | 112 | 99  | 20 | 51 | 0/0 | 0/0 | 0/0 | match | match | match |       |
| 163383 | TruSeqV2    | 10:101572816 | missense | T/T | 2.22E-16 | 152 | 99  | 15 | 45 | 0/0 | 0/0 | 0/0 | match | match | match |       |
| 198564 | Agilent38MB | 10:101572816 | missense | T/T | 6.66E-16 | 195 | 99  | 17 | 42 | 0/0 | 0/0 | 0/0 | match | match | match |       |
| 108971 | TruSeqV2    | 10:101572880 | synon    | C/C | 4.44E-16 | 189 | 99  | 43 | 99 | 0/0 | 0/0 | 0/0 | match | match | match |       |
| 115239 | TruSeqV2    | 10:101572880 | synon    | C/C | 2.22E-16 | 123 | 99  | 33 | 93 | 0/0 | 0/0 | 0/0 | match | match | match |       |
| 132306 | Agilent38MB | 10:101572880 | synon    | C/C | 2.22E-16 | 76  | 99  | 31 | 56 | 0/0 | 0/0 | 0/0 | match | match | match |       |
| 163383 | TruSeqV2    | 10:101572880 | synon    | C/C | 2.22E-16 | 127 | 99  | 36 | 93 | 0/0 | 0/0 | 0/0 | match | match | match |       |
| 198564 | Agilent38MB | 10:101572880 | synon    | C/C | 4.44E-16 | 155 | 99  | 43 | 99 | 0/0 | 0/0 | 0/0 | match | match | match |       |
| 108971 | TruSeqV2    | 10:101577123 | missense | A/A | 3.11E-15 | 185 | 99  | 41 | 99 | 0/0 | 0/0 | 0/0 | match | match | match |       |
| 115239 | TruSeqV2    | 10:101577123 | missense | A/A | 5.11E-15 | 113 | 99  | 42 | 99 | 0/0 | 0/0 | 0/0 | match | match | match |       |

|        |             |              |          |     |          |     |    |    |    |     |     |     |       |       |       |
|--------|-------------|--------------|----------|-----|----------|-----|----|----|----|-----|-----|-----|-------|-------|-------|
| 132306 | Agilent38MB | 10:101577123 | missense | A/A | 2.64E-14 | 129 | 99 | 31 | 87 | 0/0 | 0/0 | 0/0 | match | match | match |
| 163383 | TruSeqV2    | 10:101577123 | missense | A/A | 6.00E-15 | 163 | 99 | 40 | 99 | 0/0 | 0/0 | 0/0 | match | match | match |
| 198564 | Agilent38MB | 10:101577123 | missense | A/A | 2.89E-15 | 262 | 99 | 43 | 99 | 0/0 | 0/0 | 0/0 | match | match | match |
| 108971 | TruSeqV2    | 10:101578577 | missense | C/C | 2.22E-16 | 103 | 99 | 41 | 99 | 0/0 | 0/0 | 0/0 | match | match | match |
| 115239 | TruSeqV2    | 10:101578577 | missense | C/C | 2.22E-16 | 71  | 99 | 35 | 61 | 0/0 | 0/0 | 0/0 | match | match | match |
| 132306 | Agilent38MB | 10:101578577 | missense | C/C | 2.22E-16 | 154 | 99 | 43 | 99 | 0/0 | 0/0 | 0/0 | match | match | match |
| 163383 | TruSeqV2    | 10:101578577 | missense | C/C | 2.22E-16 | 102 | 99 | 35 | 99 | 0/0 | 0/0 | 0/0 | match | match | match |
| 198564 | Agilent38MB | 10:101578577 | missense | C/C | 2.22E-16 | 302 | 99 | 48 | 99 | 0/0 | 0/0 | 0/0 | match | match | match |
| 108971 | TruSeqV2    | 10:101578641 | missense | C/C | 6.66E-16 | 129 | 99 | 45 | 99 | 0/0 | 0/0 | 0/0 | match | match | match |
| 115239 | TruSeqV2    | 10:101578641 | missense | C/C | 4.44E-16 | 93  | 99 | 40 | 99 | 0/0 | 0/0 | 0/0 | match | match | match |
| 132306 | Agilent38MB | 10:101578641 | missense | C/C | 2.22E-16 | 114 | 99 | 38 | 99 | 0/0 | 0/0 | 0/0 | match | match | match |
| 163383 | TruSeqV2    | 10:101578641 | missense | C/C | 6.66E-16 | 118 | 99 | 33 | 84 | 0/0 | 0/0 | 0/0 | match | match | match |
| 198564 | Agilent38MB | 10:101578641 | missense | C/C | 2.22E-16 | 178 | 99 | 45 | 99 | 0/0 | 0/0 | 0/0 | match | match | match |
| 108971 | TruSeqV2    | 10:101578952 | missense | T/T | 2.00E-15 | 126 | 99 | 34 | 87 | 0/0 | 0/0 | 0/0 | match | match | match |
| 115239 | TruSeqV2    | 10:101578952 | missense | T/T | 6.66E-16 | 86  | 99 | 35 | 93 | 0/0 | 0/0 | 0/0 | match | match | match |
| 132306 | Agilent38MB | 10:101578952 | missense | T/T | 6.66E-16 | 62  | 99 | 35 | 78 | 0/0 | 0/0 | 0/0 | match | match | match |
| 163383 | TruSeqV2    | 10:101578952 | missense | T/T | 6.66E-16 | 96  | 99 | 34 | 90 | 0/0 | 0/0 | 0/0 | match | match | match |
| 198564 | Agilent38MB | 10:101578952 | missense | T/T | 4.44E-16 | 111 | 99 | 32 | 72 | 0/0 | 0/0 | 0/0 | match | match | match |
| 108971 | TruSeqV2    | 10:101590120 | missense | G/G | 2.22E-16 | 320 | 99 | 24 | 60 | 0/0 | 0/0 | 0/0 | match | match | match |
| 115239 | TruSeqV2    | 10:101590120 | missense | G/G | 6.66E-16 | 216 | 99 | 36 | 90 | 0/0 | 0/0 | 0/0 | match | match | match |
| 132306 | Agilent38MB | 10:101590120 | missense | G/G | 2.22E-16 | 195 | 99 | 28 | 67 | 0/0 | 0/0 | 0/0 | match | match | match |
| 163383 | TruSeqV2    | 10:101590120 | missense | G/G | 2.22E-16 | 291 | 99 | 25 | 72 | 0/0 | 0/0 | 0/0 | match | match | match |
| 198564 | Agilent38MB | 10:101590120 | missense | G/G | 2.22E-16 | 361 | 99 | 41 | 99 | 0/0 | 0/0 | 0/0 | match | match | match |
| 108971 | TruSeqV2    | 10:101591385 | stop     | C/C | 1.78E-15 | 78  | 99 | 47 | 99 | 0/0 | 0/0 | 0/0 | match | match | match |
| 115239 | TruSeqV2    | 10:101591385 | stop     | C/C | 1.11E-15 | 44  | 99 | 46 | 99 | 0/0 | 0/0 | 0/0 | match | match | match |
| 132306 | Agilent38MB | 10:101591385 | stop     | C/C | 4.44E-16 | 277 | 99 | 43 | 99 | 0/0 | 0/0 | 0/0 | match | match | match |
| 163383 | TruSeqV2    | 10:101591385 | stop     | C/C | 1.55E-15 | 51  | 99 | 41 | 99 | 0/0 | 0/0 | 0/0 | match | match | match |
| 198564 | Agilent38MB | 10:101591385 | stop     | C/C | 3.71E-14 | 455 | 99 | 40 | 98 | 0/0 | 0/0 | 0/0 | match | match | match |
| 108971 | TruSeqV2    | 10:101591418 | synon    | G/G | 4.44E-16 | 114 | 99 | 42 | 99 | 0/0 | 0/0 | 0/0 | match | match | match |
| 115239 | TruSeqV2    | 10:101591418 | synon    | G/G | 4.44E-16 | 68  | 99 | 46 | 99 | 0/0 | 0/0 | 0/0 | match | match | match |
| 132306 | Agilent38MB | 10:101591418 | synon    | G/G | 4.44E-16 | 388 | 99 | 41 | 99 | 0/0 | 0/0 | 0/0 | match | match | match |
| 163383 | TruSeqV2    | 10:101591418 | synon    | G/G | 6.66E-16 | 80  | 99 | 47 | 99 | 0/0 | 0/0 | 0/0 | match | match | match |
| 198564 | Agilent38MB | 10:101591418 | synon    | G/G | 2.37E-12 | 692 | 99 | 46 | 99 | 0/0 | 0/0 | 0/0 | match | match | match |
| 108971 | TruSeqV2    | 10:101591428 | missense | A/A | 9.55E-15 | 136 | 99 | 43 | 99 | 0/0 | 0/0 | 0/0 | match | match | match |
| 115239 | TruSeqV2    | 10:101591428 | missense | A/A | 8.88E-16 | 85  | 99 | 48 | 99 | 0/0 | 0/0 | 0/0 | match | match | match |
| 132306 | Agilent38MB | 10:101591428 | missense | A/A | 5.33E-15 | 395 | 99 | 40 | 99 | 0/0 | 0/0 | 0/0 | match | match | match |
| 163383 | TruSeqV2    | 10:101591428 | missense | A/A | 2.78E-14 | 101 | 99 | 53 | 99 | 0/0 | 0/0 | 0/0 | match | match | match |
| 198564 | Agilent38MB | 10:101591428 | missense | A/A | 4.66E-15 | 726 | 99 | 40 | 99 | 0/0 | 0/0 | 0/0 | match | match | match |



|        |             |              |          |     |          |     |    |    |    |     |     |     |       |       |       |
|--------|-------------|--------------|----------|-----|----------|-----|----|----|----|-----|-----|-----|-------|-------|-------|
| 108971 | TruSeqV2    | 10:101591737 | missense | T/T | 4.44E-16 | 92  | 99 | 44 | 99 | 0/0 | 0/0 | 0/0 | match | match | match |
| 115239 | TruSeqV2    | 10:101591737 | missense | T/T | 6.66E-16 | 64  | 99 | 42 | 99 | 0/0 | 0/0 | 0/0 | match | match | match |
| 132306 | Agilent38MB | 10:101591737 | missense | T/T | 4.44E-16 | 215 | 99 | 49 | 99 | 0/0 | 0/0 | 0/0 | match | match | match |
| 163383 | TruSeqV2    | 10:101591737 | missense | T/T | 4.44E-16 | 100 | 99 | 49 | 99 | 0/0 | 0/0 | 0/0 | match | match | match |
| 198564 | Agilent38MB | 10:101591737 | missense | T/T | 1.78E-15 | 366 | 99 | 52 | 99 | 0/0 | 0/0 | 0/0 | match | match | match |
| 108971 | TruSeqV2    | 10:101591826 | stop     | C/C | 6.66E-16 | 119 | 99 | 45 | 99 | 0/0 | 0/0 | 0/0 | match | match | match |
| 115239 | TruSeqV2    | 10:101591826 | stop     | C/C | 3.33E-15 | 77  | 99 | 46 | 99 | 0/0 | 0/0 | 0/0 | match | match | match |
| 132306 | Agilent38MB | 10:101591826 | stop     | C/C | 6.66E-16 | 120 | 99 | 42 | 93 | 0/0 | 0/0 | 0/0 | match | match | match |
| 163383 | TruSeqV2    | 10:101591826 | stop     | C/C | 4.44E-16 | 116 | 99 | 47 | 99 | 0/0 | 0/0 | 0/0 | match | match | match |
| 198564 | Agilent38MB | 10:101591826 | stop     | C/C | 2.22E-16 | 189 | 99 | 41 | 99 | 0/0 | 0/0 | 0/0 | match | match | match |
| 108971 | TruSeqV2    | 10:101594274 | synon    | T/T | 4.44E-16 | 207 | 99 | 51 | 99 | 0/0 | 0/0 | 0/0 | match | match | match |
| 115239 | TruSeqV2    | 10:101594274 | synon    | T/T | 4.44E-16 | 130 | 99 | 49 | 99 | 0/0 | 0/0 | 0/0 | match | match | match |
| 132306 | Agilent38MB | 10:101594274 | synon    | T/T | 4.44E-16 | 440 | 99 | 37 | 96 | 0/0 | 0/0 | 0/0 | match | match | match |
| 163383 | TruSeqV2    | 10:101594274 | synon    | T/T | 6.66E-16 | 179 | 99 | 47 | 99 | 0/0 | 0/0 | 0/0 | match | match | match |
| 198564 | Agilent38MB | 10:101594274 | synon    | T/T | 2.00E-15 | 800 | 99 | 37 | 99 | 0/0 | 0/0 | 0/0 | match | match | match |
| 108971 | TruSeqV2    | 10:101595950 | missense | A/A | 8.88E-16 | 285 | 99 | 43 | 99 | 0/0 | 0/0 | 0/0 | match | match | match |
| 115239 | TruSeqV2    | 10:101595950 | missense | A/A | 6.22E-15 | 192 | 99 | 33 | 96 | 0/0 | 0/0 | 0/0 | match | match | match |
| 132306 | Agilent38MB | 10:101595950 | missense | A/A | 2.22E-16 | 196 | 99 | 31 | 81 | 0/0 | 0/0 | 0/0 | match | match | match |
| 163383 | TruSeqV2    | 10:101595950 | missense | A/A | 2.22E-16 | 254 | 99 | 46 | 99 | 0/0 | 0/0 | 0/0 | match | match | match |
| 198564 | Agilent38MB | 10:101595950 | missense | A/A | 2.22E-16 | 384 | 99 | 54 | 99 | 0/0 | 0/0 | 0/0 | match | match | match |
| 108971 | TruSeqV2    | 10:101595975 | missense | G/G | 5.88E-14 | 260 | 99 | 40 | 99 | 0/0 | 0/0 | 0/0 | match | match | match |
| 115239 | TruSeqV2    | 10:101595975 | missense | G/G | 3.24E-14 | 172 | 99 | 45 | 99 | 0/0 | 0/0 | 0/0 | match | match | match |
| 132306 | Agilent38MB | 10:101595975 | missense | G/G | 6.66E-16 | 191 | 99 | 27 | 80 | 0/0 | 0/0 | 0/0 | match | match | match |
| 163383 | TruSeqV2    | 10:101595975 | missense | G/G | 6.66E-16 | 243 | 99 | 48 | 99 | 0/0 | 0/0 | 0/0 | match | match | match |
| 198564 | Agilent38MB | 10:101595975 | missense | G/G | 5.71E-14 | 369 | 99 | 51 | 99 | 0/0 | 0/0 | 0/0 | match | match | match |
| 108971 | TruSeqV2    | 10:101595994 | synon    | G/G | 2.22E-16 | 235 | 99 | 43 | 99 | 0/0 | 0/0 | 0/0 | match | match | match |
| 115239 | TruSeqV2    | 10:101595994 | synon    | G/G | 2.22E-16 | 159 | 99 | 40 | 98 | 0/0 | 0/0 | 0/0 | match | match | match |
| 132306 | Agilent38MB | 10:101595994 | synon    | G/G | 6.66E-16 | 206 | 99 | 28 | 55 | 0/0 | 0/0 | 0/0 | match | match | match |
| 163383 | TruSeqV2    | 10:101595994 | synon    | G/G | 2.22E-16 | 205 | 99 | 46 | 99 | 0/0 | 0/0 | 0/0 | match | match | match |
| 198564 | Agilent38MB | 10:101595994 | synon    | G/G | 7.21E-13 | 359 | 99 | 59 | 99 | 0/0 | 0/0 | 0/0 | match | match | match |
| 108971 | TruSeqV2    | 10:101595996 | missense | T/T | 4.44E-16 | 232 | 99 | 42 | 99 | 0/0 | 0/0 | 0/0 | match | match | match |
| 115239 | TruSeqV2    | 10:101595996 | missense | T/T | 4.44E-16 | 162 | 99 | 39 | 99 | 0/0 | 0/0 | 0/0 | match | match | match |
| 132306 | Agilent38MB | 10:101595996 | missense | T/T | 6.22E-15 | 203 | 99 | 28 | 75 | 0/0 | 0/0 | 0/0 | match | match | match |
| 163383 | TruSeqV2    | 10:101595996 | missense | T/T | 4.44E-16 | 207 | 99 | 45 | 99 | 0/0 | 0/0 | 0/0 | match | match | match |
| 198564 | Agilent38MB | 10:101595996 | missense | A/T | 1.78E-15 | 346 | 99 | 61 | 99 | 0/1 | 0/1 | 0/1 | match | match | match |
| 108971 | TruSeqV2    | 10:101603631 | missense | A/A | 2.22E-16 | 109 | 99 | 25 | 57 | 0/0 | 0/0 | 0/0 | match | match | match |
| 115239 | TruSeqV2    | 10:101603631 | missense | A/A | 4.44E-16 | 84  | 99 | 31 | 87 | 0/0 | 0/0 | 0/0 | match | match | match |
| 132306 | Agilent38MB | 10:101603631 | missense | A/A | 8.88E-16 | 40  | 99 | 22 | 63 | 0/0 | 0/0 | 0/0 | match | match | match |

|        |             |              |          |     |          |     |    |    |    |     |     |     |       |       |       |
|--------|-------------|--------------|----------|-----|----------|-----|----|----|----|-----|-----|-----|-------|-------|-------|
| 163383 | TruSeqV2    | 10:101603631 | missense | A/A | 4.44E-16 | 83  | 99 | 30 | 78 | 0/0 | 0/0 | 0/0 | match | match | match |
| 198564 | Agilent38MB | 10:101603631 | missense | A/A | 6.66E-16 | 103 | 99 | 40 | 99 | 0/0 | 0/0 | 0/0 | match | match | match |
| 108971 | TruSeqV2    | 10:101604107 | missense | C/C | 1.55E-15 | 236 | 99 | 24 | 63 | 0/0 | 0/0 | 0/0 | match | match | match |
| 115239 | TruSeqV2    | 10:101604107 | missense | C/C | 2.22E-14 | 144 | 99 | 22 | 63 | 0/0 | 0/0 | 0/0 | match | match | match |
| 132306 | Agilent38MB | 10:101604107 | missense | C/C | 6.66E-16 | 104 | 99 | 33 | 90 | 0/0 | 0/0 | 0/0 | match | match | match |
| 163383 | TruSeqV2    | 10:101604107 | missense | C/C | 8.88E-16 | 148 | 99 | 36 | 99 | 0/0 | 0/0 | 0/0 | match | match | match |
| 198564 | Agilent38MB | 10:101604107 | missense | C/C | 1.11E-15 | 213 | 99 | 33 | 87 | 0/0 | 0/0 | 0/0 | match | match | match |
| 108971 | TruSeqV2    | 10:101604130 | missense | A/A | 3.95E-14 | 278 | 99 | 32 | 87 | 0/0 | 0/0 | 0/0 | match | match | match |
| 115239 | TruSeqV2    | 10:101604130 | missense | A/A | 3.77E-15 | 180 | 99 | 25 | 63 | 0/0 | 0/0 | 0/0 | match | match | match |
| 132306 | Agilent38MB | 10:101604130 | missense | A/A | 2.22E-16 | 94  | 99 | 33 | 93 | 0/0 | 0/0 | 0/0 | match | match | match |
| 163383 | TruSeqV2    | 10:101604130 | missense | A/A | 6.66E-16 | 179 | 99 | 39 | 99 | 0/0 | 0/0 | 0/0 | match | match | match |
| 198564 | Agilent38MB | 10:101604130 | missense | A/A | 4.44E-16 | 230 | 99 | 39 | 99 | 0/0 | 0/0 | 0/0 | match | match | match |
| 108971 | TruSeqV2    | 10:101604162 | synon    | C/C | 2.22E-16 | 297 | 99 | 33 | 84 | 0/0 | 0/0 | 0/0 | match | match | match |
| 115239 | TruSeqV2    | 10:101604162 | synon    | C/C | 4.44E-16 | 189 | 99 | 33 | 90 | 0/0 | 0/0 | 0/0 | match | match | match |
| 132306 | Agilent38MB | 10:101604162 | synon    | C/C | 4.44E-16 | 81  | 99 | 32 | 90 | 0/0 | 0/0 | 0/0 | match | match | match |
| 163383 | TruSeqV2    | 10:101604162 | synon    | C/C | 2.22E-16 | 203 | 99 | 43 | 99 | 0/0 | 0/0 | 0/0 | match | match | match |
| 198564 | Agilent38MB | 10:101604162 | synon    | C/C | 4.66E-15 | 213 | 99 | 34 | 96 | 0/0 | 0/0 | 0/0 | match | match | match |
| 108971 | TruSeqV2    | 10:101604163 | stop     | C/C | 4.44E-16 | 299 | 99 | 34 | 87 | 0/0 | 0/0 | 0/0 | match | match | match |
| 115239 | TruSeqV2    | 10:101604163 | stop     | C/C | 6.66E-16 | 186 | 99 | 33 | 90 | 0/0 | 0/0 | 0/0 | match | match | match |
| 132306 | Agilent38MB | 10:101604163 | stop     | C/C | 4.44E-16 | 82  | 99 | 33 | 93 | 0/0 | 0/0 | 0/0 | match | match | match |
| 163383 | TruSeqV2    | 10:101604163 | stop     | C/C | 6.66E-16 | 206 | 99 | 42 | 99 | 0/0 | 0/0 | 0/0 | match | match | match |
| 198564 | Agilent38MB | 10:101604163 | stop     | C/C | 4.44E-16 | 207 | 99 | 34 | 82 | 0/0 | 0/0 | 0/0 | match | match | match |
| 108971 | TruSeqV2    | 10:101604207 | synon    | C/C | 4.44E-16 | 241 | 99 | 36 | 93 | 0/0 | 0/0 | 0/0 | match | match | match |
| 115239 | TruSeqV2    | 10:101604207 | synon    | C/C | 1.33E-15 | 150 | 99 | 37 | 43 | 0/0 | 0/0 | 0/0 | match | match | match |
| 132306 | Agilent38MB | 10:101604207 | synon    | C/T | 6.66E-16 | 83  | 99 | 44 | 99 | 0/1 | 0/1 | 0/1 | match | match | match |
| 163383 | TruSeqV2    | 10:101604207 | synon    | C/C | 6.66E-16 | 160 | 99 | 44 | 99 | 0/0 | 0/0 | 0/0 | match | match | match |
| 198564 | Agilent38MB | 10:101604207 | synon    | C/C | 6.66E-16 | 169 | 99 | 41 | 99 | 0/0 | 0/0 | 0/0 | match | match | match |
| 108971 | TruSeqV2    | 10:101605455 | synon    | C/C | 2.00E-15 | 141 | 99 | 31 | 75 | 0/0 | 0/0 | 0/0 | match | match | match |
| 115239 | TruSeqV2    | 10:101605455 | synon    | C/C | 3.77E-15 | 116 | 99 | 35 | 81 | 0/0 | 0/0 | 0/0 | match | match | match |
| 132306 | Agilent38MB | 10:101605455 | synon    | C/C | 2.22E-16 | 55  | 99 | 28 | 75 | 0/0 | 0/0 | 0/0 | match | match | match |
| 163383 | TruSeqV2    | 10:101605455 | synon    | C/C | 4.44E-16 | 145 | 99 | 34 | 99 | 0/0 | 0/0 | 0/0 | match | match | match |
| 198564 | Agilent38MB | 10:101605455 | synon    | C/C | 2.22E-16 | 109 | 99 | 38 | 99 | 0/0 | 0/0 | 0/0 | match | match | match |
| 108971 | TruSeqV2    | 10:101605503 | synon    | C/C | 6.66E-16 | 143 | 99 | 40 | 99 | 0/0 | 0/0 | 0/0 | match | match | match |
| 115239 | TruSeqV2    | 10:101605503 | synon    | C/C | 8.88E-16 | 116 | 99 | 29 | 81 | 0/0 | 0/0 | 0/0 | match | match | match |
| 132306 | Agilent38MB | 10:101605503 | synon    | C/C | 4.44E-16 | 26  | 48 | 32 | 96 | 0/0 | 0/0 | 0/0 | match | match | match |
| 163383 | TruSeqV2    | 10:101605503 | synon    | C/C | 1.11E-15 | 119 | 99 | 33 | 81 | 0/0 | 0/0 | 0/0 | match | match | match |
| 198564 | Agilent38MB | 10:101605503 | synon    | C/C | 1.55E-15 | 50  | 96 | 35 | 96 | 0/0 | 0/0 | 0/0 | match | match | match |
| 108971 | TruSeqV2    | 10:101606861 | synon    | G/G | 2.22E-16 | 205 | 99 | 47 | 99 | 0/0 | 0/0 | 0/0 | match | match | match |

|        |             |              |          |     |          |     |    |    |    |     |     |     |       |       |       |
|--------|-------------|--------------|----------|-----|----------|-----|----|----|----|-----|-----|-----|-------|-------|-------|
| 132306 | Agilent38MB | 10:101606861 | synon    | G/G | 2.22E-16 | 55  | 99 | 34 | 78 | 0/0 | 0/0 | 0/0 | match | match | match |
| 163383 | TruSeqV2    | 10:101606861 | synon    | G/G | 1.11E-15 | 157 | 99 | 39 | 99 | 0/0 | 0/0 | 0/0 | match | match | match |
| 198564 | Agilent38MB | 10:101606861 | synon    | G/T | 8.44E-15 | 72  | 99 | 38 | 99 | 0/1 | 0/1 | 0/1 | match | match | match |
| 108971 | TruSeqV2    | 10:101610393 | missense | G/G | 6.66E-16 | 124 | 99 | 27 | 78 | 0/0 | 0/0 | 0/0 | match | match | match |
| 115239 | TruSeqV2    | 10:101610393 | missense | G/G | 6.66E-16 | 78  | 99 | 26 | 63 | 0/0 | 0/0 | 0/0 | match | match | match |
| 132306 | Agilent38MB | 10:101610393 | missense | G/G | 3.33E-15 | 55  | 99 | 45 | 99 | 0/0 | 0/0 | 0/0 | match | match | match |
| 163383 | TruSeqV2    | 10:101610393 | missense | G/G | 4.44E-16 | 88  | 99 | 37 | 98 | 0/0 | 0/0 | 0/0 | match | match | match |
| 198564 | Agilent38MB | 10:101610393 | missense | G/G | 4.44E-16 | 124 | 99 | 30 | 73 | 0/0 | 0/0 | 0/0 | match | match | match |
| 108971 | TruSeqV2    | 10:101610455 | synon    | G/G | 7.99E-15 | 164 | 99 | 29 | 81 | 0/0 | 0/0 | 0/0 | match | match | match |
| 115239 | TruSeqV2    | 10:101610455 | synon    | G/G | 1.22E-14 | 85  | 99 | 37 | 99 | 0/0 | 0/0 | 0/0 | match | match | match |
| 132306 | Agilent38MB | 10:101610455 | synon    | G/G | 4.44E-16 | 174 | 99 | 33 | 84 | 0/0 | 0/0 | 0/0 | match | match | match |
| 163383 | TruSeqV2    | 10:101610455 | synon    | G/G | 1.75E-14 | 95  | 99 | 38 | 96 | 0/0 | 0/0 | 0/0 | match | match | match |
| 198564 | Agilent38MB | 10:101610455 | synon    | G/G | 1.65E-13 | 309 | 99 | 37 | 99 | 0/0 | 0/0 | 0/0 | match | match | match |
| 108971 | TruSeqV2    | 10:101610533 | synon    | C/C | 4.44E-16 | 100 | 99 | 31 | 90 | 0/0 | 0/0 | 0/0 | match | match | match |
| 115239 | TruSeqV2    | 10:101610533 | synon    | C/C | 4.44E-16 | 53  | 99 | 27 | 69 | 0/0 | 0/0 | 0/0 | match | match | match |
| 132306 | Agilent38MB | 10:101610533 | synon    | C/C | 2.22E-16 | 278 | 99 | 20 | 57 | 0/0 | 0/0 | 0/0 | match | match | match |
| 163383 | TruSeqV2    | 10:101610533 | synon    | C/C | 2.22E-16 | 46  | 99 | 29 | 78 | 0/0 | 0/0 | 0/0 | match | match | match |
| 198564 | Agilent38MB | 10:101610533 | synon    | C/T | 4.60E-14 | 463 | 99 | 33 | 99 | 0/1 | 0/1 | 0/1 | match | match | match |
| 108971 | TruSeqV2    | 10:101611277 | synon    | C/C | 4.44E-16 | 23  | 66 | 32 | 87 | 0/0 | 0/0 | 0/0 | match | match | match |
| 115239 | TruSeqV2    | 10:101611277 | synon    | C/C | 2.22E-16 | 13  | 36 | 42 | 99 | 0/0 | 0/0 | 0/0 | match | match | match |
| 132306 | Agilent38MB | 10:101611277 | synon    | C/C | 2.22E-16 | 95  | 99 | 40 | 99 | 0/0 | 0/0 | 0/0 | match | match | match |
| 163383 | TruSeqV2    | 10:101611277 | synon    | C/C | 2.22E-16 | 21  | 57 | 39 | 99 | 0/0 | 0/0 | 0/0 | match | match | match |
| 198564 | Agilent38MB | 10:101611277 | synon    | C/C | 2.22E-16 | 160 | 99 | 32 | 93 | 0/0 | 0/0 | 0/0 | match | match | match |
| 108971 | TruSeqV2    | 10:101611294 | missense | G/G | 7.93E-13 | 28  | 78 | 35 | 93 | 0/0 | 0/0 | 0/0 | match | match | match |
| 115239 | TruSeqV2    | 10:101611294 | missense | G/G | 1.84E-14 | 13  | 27 | 49 | 99 | 0/0 | 0/0 | 0/0 | match | match | match |
| 132306 | Agilent38MB | 10:101611294 | missense | G/G | 1.31E-14 | 84  | 99 | 38 | 99 | 0/0 | 0/0 | 0/0 | match | match | match |
| 163383 | TruSeqV2    | 10:101611294 | missense | G/G | 1.20E-14 | 23  | 63 | 38 | 99 | 0/0 | 0/0 | 0/0 | match | match | match |
| 198564 | Agilent38MB | 10:101611294 | missense | A/G | 9.00E-13 | 146 | 99 | 33 | 99 | 0/1 | 0/1 | 0/1 | match | match | match |
| 108971 | TruSeqV2    | 10:104590702 | synon    | C/C | 2.22E-16 | 129 | 99 | 42 | 99 | 0/0 | 0/0 | 0/0 | match | match | match |
| 115239 | TruSeqV2    | 10:104590702 | synon    | C/C | 2.22E-16 | 82  | 99 | 35 | 84 | 0/0 | 0/0 | 0/0 | match | match | match |
| 132306 | Agilent38MB | 10:104590702 | synon    | C/C | 4.44E-16 | 18  | 48 | 43 | 92 | 0/0 | 0/0 | 0/0 | match | match | match |
| 163383 | TruSeqV2    | 10:104590702 | synon    | C/C | 6.66E-16 | 115 | 99 | 37 | 58 | 0/0 | 0/0 | 0/0 | match | match | match |
| 198564 | Agilent38MB | 10:104590702 | synon    | C/C | 2.00E-15 | 42  | 99 | 55 | 99 | 0/0 | 0/0 | 0/0 | match | match | match |
| 108971 | TruSeqV2    | 10:104592870 | synon    | G/G | 8.88E-16 | 205 | 99 | 34 | 96 | 0/0 | 0/0 | 0/0 | match | match | match |
| 115239 | TruSeqV2    | 10:104592870 | synon    | G/G | 2.22E-16 | 148 | 99 | 35 | 93 | 0/0 | 0/0 | 0/0 | match | match | match |
| 132306 | Agilent38MB | 10:104592870 | synon    | G/G | 2.22E-16 | 167 | 99 | 46 | 99 | 0/0 | 0/0 | 0/0 | match | match | match |
| 163383 | TruSeqV2    | 10:104592870 | synon    | G/G | 4.44E-16 | 149 | 99 | 40 | 99 | 0/0 | 0/0 | 0/0 | match | match | match |
| 198564 | Agilent38MB | 10:104592870 | synon    | G/G | 2.22E-15 | 349 | 99 | 54 | 99 | 0/0 | 0/0 | 0/0 | match | match | match |

|        |             |              |          |     |          |     |    |    |    |     |     |     |       |       |       |
|--------|-------------|--------------|----------|-----|----------|-----|----|----|----|-----|-----|-----|-------|-------|-------|
| 108971 | TruSeqV2    | 10:104596924 | synon    | C/A | 1.33E-15 | 225 | 99 | 38 | 99 | 0/1 | 0/1 | 0/1 | match | match | match |
| 115239 | TruSeqV2    | 10:104596924 | synon    | C/C | 1.55E-15 | 148 | 99 | 20 | 48 | 0/0 | 0/0 | 0/0 | match | match | match |
| 132306 | Agilent38MB | 10:104596924 | synon    | C/A | 6.66E-16 | 36  | 99 | 41 | 99 | 0/1 | 0/1 | 0/1 | match | match | match |
| 163383 | TruSeqV2    | 10:104596924 | synon    | C/A | 2.22E-16 | 170 | 99 | 35 | 99 | 0/1 | 0/1 | 0/1 | match | match | match |
| 198564 | Agilent38MB | 10:104596924 | synon    | C/A | 8.88E-16 | 51  | 99 | 47 | 99 | 0/1 | 0/1 | 0/1 | match | match | match |
| 108971 | TruSeqV2    | 10:104596981 | synon    | G/A | 2.22E-16 | 269 | 99 | 39 | 99 | 0/1 | 0/1 | 0/1 | match | match | match |
| 115239 | TruSeqV2    | 10:104596981 | synon    | G/G | 1.33E-15 | 178 | 99 | 21 | 45 | 0/0 | 0/0 | 0/0 | match | match | match |
| 132306 | Agilent38MB | 10:104596981 | synon    | A/A | 1.55E-15 | 51  | 99 | 36 | 99 | 1/1 | 1/1 | 1/1 | match | match | match |
| 163383 | TruSeqV2    | 10:104596981 | synon    | G/A | 4.44E-16 | 213 | 99 | 37 | 99 | 0/1 | 0/1 | 0/1 | match | match | match |
| 198564 | Agilent38MB | 10:104596981 | synon    | G/A | 2.22E-16 | 101 | 99 | 45 | 99 | 0/1 | 0/1 | 0/1 | match | match | match |
| 108971 | TruSeqV2    | 10:104597053 | missense | G/G | 2.22E-16 | 171 | 99 | 29 | 86 | 0/0 | 0/0 | 0/0 | match | match | match |
| 115239 | TruSeqV2    | 10:104597053 | missense | G/G | 2.22E-16 | 122 | 99 | 23 | 63 | 0/0 | 0/0 | 0/0 | match | match | match |
| 132306 | Agilent38MB | 10:104597053 | missense | G/G | 4.44E-16 | 42  | 99 | 29 | 87 | 0/0 | 0/0 | 0/0 | match | match | match |
| 163383 | TruSeqV2    | 10:104597053 | missense | G/G | 2.22E-16 | 129 | 99 | 28 | 75 | 0/0 | 0/0 | 0/0 | match | match | match |
| 198564 | Agilent38MB | 10:104597053 | missense | G/G | 2.22E-16 | 58  | 99 | 41 | 99 | 0/0 | 0/0 | 0/0 | match | match | match |
| 108971 | TruSeqV2    | 10:104597152 | 5'UTR    | G/A | 8.39E-12 | 319 | 99 | 41 | 99 | 0/1 | 0/1 | 0/1 | match | match | match |
| 115239 | TruSeqV2    | 10:104597152 | 5'UTR    | A/A | 1.55E-15 | 224 | 99 | 27 | 72 | 0/0 | 0/0 | 0/0 | match | match | match |
| 132306 | Agilent38MB | 10:104597152 | 5'UTR    | G/A | 8.88E-16 | 10  | 99 | 44 | 99 | 0/1 | 0/1 | 0/1 | match | match | match |
| 163383 | TruSeqV2    | 10:104597152 | 5'UTR    | G/A | 1.31E-14 | 249 | 99 | 36 | 99 | 0/1 | 0/1 | 0/1 | match | match | match |
| 198564 | Agilent38MB | 10:104597152 | 5'UTR    | G/A | 2.02E-14 | 21  | 99 | 47 | 99 | 0/1 | 0/1 | 0/1 | match | match | match |
| 108971 | TruSeqV2    | 10:106019447 | missense | C/C | 2.22E-16 | 130 | 99 | 40 | 99 | 0/0 | 0/0 | 0/0 | match | match | match |
| 115239 | TruSeqV2    | 10:106019447 | missense | C/C | 2.22E-16 | 78  | 99 | 50 | 99 | 0/0 | 0/0 | 0/0 | match | match | match |
| 132306 | Agilent38MB | 10:106019447 | missense | C/C | 2.22E-16 | 204 | 99 | 29 | 78 | 0/0 | 0/0 | 0/0 | match | match | match |
| 163383 | TruSeqV2    | 10:106019447 | missense | C/C | 2.22E-16 | 110 | 99 | 45 | 99 | 0/0 | 0/0 | 0/0 | match | match | match |
| 198564 | Agilent38MB | 10:106019447 | missense | C/C | 2.22E-16 | 310 | 99 | 46 | 99 | 0/0 | 0/0 | 0/0 | match | match | match |
| 108971 | TruSeqV2    | 10:106022789 | missense | C/C | 2.44E-15 | 108 | 99 | 55 | 99 | 0/0 | 0/0 | 0/0 | match | match | match |
| 115239 | TruSeqV2    | 10:106022789 | missense | A/A | 3.24E-14 | 81  | 99 | 47 | 98 | 1/1 | 1/1 | 1/1 | match | match | match |
| 132306 | Agilent38MB | 10:106022789 | missense | A/A | 3.40E-14 | 65  | 99 | 35 | 99 | 1/1 | 1/1 | 1/1 | match | match | match |
| 163383 | TruSeqV2    | 10:106022789 | missense | A/C | 7.33E-15 | 85  | 99 | 46 | 99 | 0/1 | 0/1 | 0/1 | match | match | match |
| 198564 | Agilent38MB | 10:106022789 | missense | A/C | 2.22E-15 | 132 | 99 | 40 | 99 | 0/1 | 0/1 | 0/1 | match | match | match |
| 108971 | TruSeqV2    | 10:106027073 | synon    | C/C | 6.66E-16 | 153 | 99 | 37 | 93 | 0/0 | 0/0 | 0/0 | match | match | match |
| 115239 | TruSeqV2    | 10:106027073 | synon    | C/C | 6.66E-16 | 109 | 99 | 38 | 96 | 0/0 | 0/0 | 0/0 | match | match | match |
| 132306 | Agilent38MB | 10:106027073 | synon    | C/C | 6.66E-16 | 122 | 99 | 28 | 81 | 0/0 | 0/0 | 0/0 | match | match | match |
| 163383 | TruSeqV2    | 10:106027073 | synon    | C/C | 3.33E-15 | 133 | 99 | 42 | 99 | 0/0 | 0/0 | 0/0 | match | match | match |
| 198564 | Agilent38MB | 10:106027073 | synon    | C/C | 3.11E-15 | 210 | 99 | 45 | 99 | 0/0 | 0/0 | 0/0 | match | match | match |
| 108971 | TruSeqV2    | 10:106027087 | missense | C/C | 6.66E-16 | 173 | 99 | 38 | 99 | 0/0 | 0/0 | 0/0 | match | match | match |
| 115239 | TruSeqV2    | 10:106027087 | missense | C/C | 4.44E-16 | 117 | 99 | 33 | 96 | 0/0 | 0/0 | 0/0 | match | match | match |
| 132306 | Agilent38MB | 10:106027087 | missense | C/C | 2.22E-16 | 119 | 99 | 29 | 78 | 0/0 | 0/0 | 0/0 | match | match | match |

|        |             |              |          |     |          |     |    |    |    |     |     |     |       |       |       |
|--------|-------------|--------------|----------|-----|----------|-----|----|----|----|-----|-----|-----|-------|-------|-------|
| 163383 | TruSeqV2    | 10:106027087 | missense | C/C | 2.22E-16 | 143 | 99 | 46 | 99 | 0/0 | 0/0 | 0/0 | match | match | match |
| 198564 | Agilent38MB | 10:106027087 | missense | C/C | 2.22E-16 | 200 | 99 | 47 | 99 | 0/0 | 0/0 | 0/0 | match | match | match |
| 108971 | TruSeqV2    | 10:106027165 | 3'UTR    | G/G | 2.22E-16 | 160 | 99 | 47 | 99 | 0/0 | 0/0 | 0/0 | match | match | match |
| 115239 | TruSeqV2    | 10:106027165 | 3'UTR    | G/G | 2.00E-15 | 97  | 99 | 35 | 93 | 0/0 | 0/0 | 0/0 | match | match | match |
| 132306 | Agilent38MB | 10:106027165 | 3'UTR    | G/G | 4.44E-16 | 111 | 99 | 29 | 78 | 0/0 | 0/0 | 0/0 | match | match | match |
| 163383 | TruSeqV2    | 10:106027165 | 3'UTR    | G/G | 4.44E-16 | 136 | 99 | 37 | 93 | 0/0 | 0/0 | 0/0 | match | match | match |
| 198564 | Agilent38MB | 10:106027165 | 3'UTR    | G/G | 4.44E-13 | 191 | 99 | 40 | 99 | 0/0 | 0/0 | 0/0 | match | match | match |
| 132306 | Agilent38MB | 10:135340548 | promoter | A/A | 2.89E-15 | 2   | 6  | 58 | 99 | 0/0 | 0/0 | 0/0 | match | match | match |
| 198564 | Agilent38MB | 10:135340548 | promoter | A/A | 8.88E-16 | 3   | 9  | 32 | 87 | 0/0 | 0/0 | 0/0 | match | match | match |
| 198564 | Agilent38MB | 10:135340567 | promoter | A/T | 1.55E-15 | 5   | 24 | 38 | 99 | 0/1 | 0/1 | 0/1 | match | match | match |
| 108971 | TruSeqV2    | 10:135340829 | promoter | G/G | 8.88E-16 | 51  | 99 | 77 | 99 | 0/0 | 0/0 | 0/0 | match | match | match |
| 115239 | TruSeqV2    | 10:135340829 | promoter | G/T | 9.33E-15 | 24  | 99 | 28 | 99 | 0/1 | 0/1 | 0/1 | match | match | match |
| 132306 | Agilent38MB | 10:135340829 | promoter | G/G | 2.22E-16 | 4   | 9  | 48 | 93 | 0/0 | 0/0 | 0/0 | match | match | match |
| 163383 | TruSeqV2    | 10:135340829 | promoter | G/G | 4.44E-16 | 30  | 66 | 50 | 99 | 0/0 | 0/0 | 0/0 | match | match | match |
| 108971 | TruSeqV2    | 10:135342034 | missense | G/G | 2.22E-16 | 236 | 99 | 45 | 99 | 0/0 | 0/0 | 0/0 | match | match | match |
| 115239 | TruSeqV2    | 10:135342034 | missense | G/G | 8.88E-16 | 106 | 99 | 9  | 24 | 0/0 | 0/0 | 0/0 | match | match | match |
| 132306 | Agilent38MB | 10:135342034 | missense | G/G | 2.22E-15 | 48  | 99 | 34 | 96 | 0/0 | 0/0 | 0/0 | match | match | match |
| 163383 | TruSeqV2    | 10:135342034 | missense | G/G | 4.44E-16 | 122 | 99 | 26 | 75 | 0/0 | 0/0 | 0/0 | match | match | match |
| 198564 | Agilent38MB | 10:135342034 | missense | G/G | 2.22E-16 | 50  | 99 | 28 | 78 | 0/0 | 0/0 | 0/0 | match | match | match |
| 108971 | TruSeqV2    | 10:135345675 | missense | G/G | 4.44E-16 | 282 | 99 | 63 | 99 | 0/0 | 0/0 | 0/0 | match | match | match |
| 115239 | TruSeqV2    | 10:135345675 | missense | G/G | 6.66E-16 | 116 | 99 | 27 | 0  | 0/0 | 0/0 | 0/0 | match | match | match |
| 132306 | Agilent38MB | 10:135345675 | missense | A/G | 8.77E-12 | 267 | 99 | 50 | 99 | 0/1 | 0/1 | 0/1 | match | match | match |
| 163383 | TruSeqV2    | 10:135345675 | missense | G/G | 6.66E-16 | 149 | 99 | 31 | 87 | 0/0 | 0/0 | 0/0 | match | match | match |
| 198564 | Agilent38MB | 10:135345675 | missense | G/G | 1.55E-15 | 405 | 99 | 36 | 99 | 0/0 | 0/0 | 0/0 | match | match | match |
| 108971 | TruSeqV2    | 10:135347397 | synon    | C/C | 2.22E-15 | 190 | 99 | 57 | 99 | 1/1 | 1/1 | 1/1 | match | match | match |
| 115239 | TruSeqV2    | 10:135347397 | synon    | C/C | 2.22E-16 | 71  | 99 | 28 | 84 | 1/1 | 1/1 | 1/1 | match | match | match |
| 132306 | Agilent38MB | 10:135347397 | synon    | C/C | 8.88E-16 | 104 | 99 | 53 | 99 | 1/1 | 1/1 | 1/1 | match | match | match |
| 163383 | TruSeqV2    | 10:135347397 | synon    | C/C | 2.22E-16 | 102 | 99 | 35 | 99 | 1/1 | 1/1 | 1/1 | match | match | match |
| 198564 | Agilent38MB | 10:135347397 | synon    | C/C | 4.44E-16 | 141 | 99 | 36 | 99 | 1/1 | 1/1 | 1/1 | match | match | match |
| 108971 | TruSeqV2    | 10:135351264 | missense | G/G | 2.22E-16 | 121 | 99 | 59 | 99 | 0/0 | 0/0 | 0/0 | match | match | match |
| 115239 | TruSeqV2    | 10:135351264 | missense | G/G | 6.66E-16 | 59  | 99 | 51 | 99 | 0/0 | 0/0 | 0/0 | match | match | match |
| 132306 | Agilent38MB | 10:135351264 | missense | G/G | 2.22E-16 | 81  | 99 | 50 | 99 | 0/0 | 0/0 | 0/0 | match | match | match |
| 163383 | TruSeqV2    | 10:135351264 | missense | G/G | 4.44E-16 | 70  | 99 | 37 | 90 | 0/0 | 0/0 | 0/0 | match | match | match |
| 198564 | Agilent38MB | 10:135351264 | missense | G/G | 1.78E-15 | 101 | 99 | 42 | 90 | 0/0 | 0/0 | 0/0 | match | match | match |
| 108971 | TruSeqV2    | 10:135351362 | synon    | C/T | 5.03E-13 | 105 | 99 | 68 | 99 | 0/1 | 0/1 | 0/1 | match | match | match |
| 115239 | TruSeqV2    | 10:135351362 | synon    | C/T | 2.00E-15 | 38  | 99 | 52 | 99 | 0/1 | 0/1 | 0/1 | match | match | match |
| 132306 | Agilent38MB | 10:135351362 | synon    | C/T | 4.31E-14 | 99  | 99 | 62 | 99 | 0/1 | 0/1 | 0/1 | match | match | match |
| 163383 | TruSeqV2    | 10:135351362 | synon    | C/C | 2.66E-15 | 55  | 99 | 52 | 99 | 1/1 | 1/1 | 1/1 | match | match | match |

|        |             |              |       |     |          |     |    |    |    |     |     |     |       |       |       |
|--------|-------------|--------------|-------|-----|----------|-----|----|----|----|-----|-----|-----|-------|-------|-------|
| 198564 | Agilent38MB | 10:135351362 | synon | C/T | 3.11E-14 | 126 | 99 | 45 | 99 | 0/1 | 0/1 | 0/1 | match | match | match |
| 108971 | TruSeqV2    | 10:73769359  | 3'UTR | C/C | 3.33E-15 | 84  | 99 | 26 | 69 | 0/0 | 0/0 | 0/0 | match | match | match |
| 115239 | TruSeqV2    | 10:73769359  | 3'UTR | C/C | 1.78E-15 | 53  | 99 | 26 | 69 | 0/0 | 0/0 | 0/0 | match | match | match |
| 163383 | TruSeqV2    | 10:73769359  | 3'UTR | C/C | 5.20E-14 | 61  | 99 | 23 | 66 | 0/0 | 0/0 | 0/0 | match | match | match |
| 108971 | TruSeqV2    | 10:73769384  | 3'UTR | G/G | 3.33E-15 | 57  | 99 | 27 | 75 | 0/0 | 0/0 | 0/0 | match | match | match |
| 115239 | TruSeqV2    | 10:73769384  | 3'UTR | G/G | 2.22E-15 | 57  | 99 | 27 | 75 | 0/0 | 0/0 | 0/0 | match | match | match |
| 132306 | Agilent38MB | 10:73769384  | 3'UTR | G/G | 6.66E-16 | 57  | 99 | 27 | 75 | 0/0 | 0/0 | 0/0 | match | match | match |
| 163383 | TruSeqV2    | 10:73769384  | 3'UTR | G/G | 2.22E-16 | 57  | 99 | 27 | 75 | 0/0 | 0/0 | 0/0 | match | match | match |
| 198564 | Agilent38MB | 10:73769384  | 3'UTR | G/G | 2.22E-16 | 57  | 99 | 27 | 75 | 0/0 | 0/0 | 0/0 | match | match | match |
| 108971 | TruSeqV2    | 10:73769507  | 3'UTR | C/C | 6.44E-15 | 14  | 42 | 48 | 99 | 0/0 | 0/0 | 0/0 | match | match | match |
| 115239 | TruSeqV2    | 10:73769507  | 3'UTR | C/T | 1.36E-13 | 12  | 99 | 33 | 99 | 0/1 | 0/1 | 0/1 | match | match | match |
| 163383 | TruSeqV2    | 10:73769507  | 3'UTR | C/T | 4.22E-15 | 20  | 99 | 36 | 99 | 0/1 | 0/1 | 0/1 | match | match | match |
| 108971 | TruSeqV2    | 10:73769543  | 3'UTR | G/G | 9.99E-15 | 13  | 39 | 39 | 99 | 0/0 | 0/0 | 0/0 | match | match | match |
| 115239 | TruSeqV2    | 10:73769543  | 3'UTR | G/G | 2.00E-15 | 6   | 15 | 37 | 99 | 0/0 | 0/0 | 0/0 | match | match | match |
| 163383 | TruSeqV2    | 10:73769543  | 3'UTR | G/G | 4.88E-15 | 12  | 30 | 36 | 99 | 0/0 | 0/0 | 0/0 | match | match | match |
| 108971 | TruSeqV2    | 10:73769590  | 3'UTR | C/C | 1.15E-14 | 16  | 48 | 18 | 48 | 0/0 | 0/0 | 0/0 | match | match | match |
| 115239 | TruSeqV2    | 10:73769590  | 3'UTR | C/T | 4.57E-14 | 14  | 99 | 20 | 99 | 0/1 | 0/1 | 0/1 | match | match | match |
| 163383 | TruSeqV2    | 10:73769590  | 3'UTR | C/T | 1.55E-15 | 14  | 99 | 21 | 99 | 0/1 | 0/1 | 0/1 | match | match | match |
| 108971 | TruSeqV2    | 10:73770073  | 3'UTR | C/C | 6.88E-15 | 221 | 99 | 32 | 81 | 0/0 | 0/0 | 0/0 | match | match | match |
| 115239 | TruSeqV2    | 10:73770073  | 3'UTR | C/T | 7.59E-13 | 129 | 99 | 38 | 99 | 0/1 | 0/1 | 0/1 | match | match | match |
| 163383 | TruSeqV2    | 10:73770073  | 3'UTR | C/T | 6.66E-16 | 188 | 99 | 31 | 99 | 0/1 | 0/1 | 0/1 | match | match | match |
| 108971 | TruSeqV2    | 10:73770355  | 3'UTR | A/A | 1.45E-11 | 192 | 99 | 47 | 99 | 0/0 | 0/0 | 0/0 | match | match | match |
| 115239 | TruSeqV2    | 10:73770355  | 3'UTR | A/A | 1.62E-14 | 148 | 99 | 32 | 36 | 0/0 | 0/0 | 0/0 | match | match | match |
| 163383 | TruSeqV2    | 10:73770355  | 3'UTR | A/A | 1.78E-15 | 148 | 99 | 38 | 99 | 0/0 | 0/0 | 0/0 | match | match | match |
| 108971 | TruSeqV2    | 10:73770651  | 3'UTR | T/T | 2.00E-15 | 85  | 99 | 37 | 99 | 0/0 | 0/0 | 0/0 | match | match | match |
| 115239 | TruSeqV2    | 10:73770651  | 3'UTR | C/T | 1.06E-13 | 69  | 99 | 16 | 99 | 0/1 | 0/1 | 0/1 | match | match | match |
| 163383 | TruSeqV2    | 10:73770651  | 3'UTR | C/T | 3.15E-14 | 83  | 99 | 33 | 99 | 0/1 | 0/1 | 0/1 | match | match | match |
| 108971 | TruSeqV2    | 10:73771706  | 3'UTR | G/G | 4.28E-13 | 132 | 99 | 35 | 90 | 0/0 | 0/0 | 0/0 | match | match | match |
| 115239 | TruSeqV2    | 10:73771706  | 3'UTR | A/G | 7.24E-14 | 88  | 99 | 25 | 99 | 0/1 | 0/1 | 0/1 | match | match | match |
| 163383 | TruSeqV2    | 10:73771706  | 3'UTR | A/G | 1.33E-15 | 112 | 99 | 45 | 99 | 0/1 | 0/1 | 0/1 | match | match | match |
| 108971 | TruSeqV2    | 10:73771784  | 3'UTR | G/G | 1.78E-15 | 178 | 99 | 54 | 99 | 0/0 | 0/0 | 0/0 | match | match | match |
| 115239 | TruSeqV2    | 10:73771784  | 3'UTR | G/G | 1.55E-15 | 130 | 99 | 48 | 99 | 0/0 | 0/0 | 0/0 | match | match | match |
| 163383 | TruSeqV2    | 10:73771784  | 3'UTR | G/G | 6.66E-16 | 183 | 99 | 53 | 99 | 0/0 | 0/0 | 0/0 | match | match | match |
| 108971 | TruSeqV2    | 10:73772014  | 3'UTR | G/G | 1.55E-15 | 203 | 99 | 31 | 90 | 0/0 | 0/0 | 0/0 | match | match | match |
| 115239 | TruSeqV2    | 10:73772014  | 3'UTR | A/G | 3.95E-14 | 145 | 99 | 24 | 99 | 0/1 | 0/1 | 0/1 | match | match | match |
| 163383 | TruSeqV2    | 10:73772014  | 3'UTR | A/G | 8.88E-16 | 146 | 99 | 35 | 99 | 0/1 | 0/1 | 0/1 | match | match | match |
| 108971 | TruSeqV2    | 10:73772336  | 3'UTR | T/T | 3.38E-14 | 96  | 99 | 27 | 75 | 0/0 | 0/0 | 0/0 | match | match | match |
| 115239 | TruSeqV2    | 10:73772336  | 3'UTR | C/T | 2.55E-12 | 73  | 99 | 23 | 99 | 0/1 | 0/1 | 0/1 | match | match | match |

|        |             |             |          |     |          |     |    |    |    |     |     |     |       |       |       |
|--------|-------------|-------------|----------|-----|----------|-----|----|----|----|-----|-----|-----|-------|-------|-------|
| 163383 | TruSeqV2    | 10:73772336 | 3'UTR    | C/T | 1.73E-14 | 80  | 99 | 32 | 99 | 0/1 | 0/1 | 0/1 | match | match | match |
| 108971 | TruSeqV2    | 10:73772762 | 3'UTR    | C/C | 3.49E-13 | 110 | 99 | 40 | 99 | 0/0 | 0/0 | 0/0 | match | match | match |
| 115239 | TruSeqV2    | 10:73772762 | 3'UTR    | C/T | 5.90E-13 | 73  | 99 | 32 | 99 | 0/1 | 0/1 | 0/1 | match | match | match |
| 163383 | TruSeqV2    | 10:73772762 | 3'UTR    | C/T | 2.89E-15 | 106 | 99 | 35 | 99 | 0/1 | 0/1 | 0/1 | match | match | match |
| 108971 | TruSeqV2    | 10:73772999 | 3'UTR    | G/G | 8.88E-16 | 176 | 99 | 51 | 99 | 0/0 | 0/0 | 0/0 | match | match | match |
| 115239 | TruSeqV2    | 10:73772999 | 3'UTR    | G/G | 1.11E-15 | 130 | 99 | 46 | 99 | 0/0 | 0/0 | 0/0 | match | match | match |
| 132306 | Agilent38MB | 10:73772999 | 3'UTR    | G/G | 4.44E-16 | 2   | 6  | 44 | 99 | 0/0 | 0/0 | 0/0 | match | match | match |
| 163383 | TruSeqV2    | 10:73772999 | 3'UTR    | G/G | 6.66E-16 | 167 | 99 | 45 | 99 | 0/0 | 0/0 | 0/0 | match | match | match |
| 198564 | Agilent38MB | 10:73772999 | 3'UTR    | G/G | 4.44E-16 | 3   | 9  | 66 | 99 | 0/0 | 0/0 | 0/0 | match | match | match |
| 108971 | TruSeqV2    | 10:82033438 | 3'UTR    | T/T | 4.22E-15 | 181 | 99 | 28 | 75 | 0/0 | 0/0 | 0/0 | match | match | match |
| 115239 | TruSeqV2    | 10:82033438 | 3'UTR    | T/T | 3.60E-14 | 130 | 99 | 26 | 49 | 0/0 | 0/0 | 0/0 | match | match | match |
| 132306 | Agilent38MB | 10:82033438 | 3'UTR    | T/T | 2.89E-15 | 6   | 15 | 23 | 63 | 0/0 | 0/0 | 0/0 | match | match | match |
| 163383 | TruSeqV2    | 10:82033438 | 3'UTR    | T/T | 2.51E-14 | 158 | 99 | 26 | 66 | 0/0 | 0/0 | 0/0 | match | match | match |
| 198564 | Agilent38MB | 10:82033438 | 3'UTR    | T/T | 2.98E-13 | 14  | 39 | 34 | 87 | 0/0 | 0/0 | 0/0 | match | match | match |
| 108971 | TruSeqV2    | 10:82033470 | 3'UTR    | G/G | 4.44E-16 | 125 | 99 | 30 | 63 | 0/0 | 0/0 | 0/0 | match | match | match |
| 115239 | TruSeqV2    | 10:82033470 | 3'UTR    | G/G | 6.66E-16 | 103 | 99 | 21 | 54 | 0/0 | 0/0 | 0/0 | match | match | match |
| 132306 | Agilent38MB | 10:82033470 | 3'UTR    | G/G | 6.66E-16 | 15  | 42 | 20 | 57 | 0/0 | 0/0 | 0/0 | match | match | match |
| 163383 | TruSeqV2    | 10:82033470 | 3'UTR    | G/A | 4.00E-15 | 119 | 99 | 34 | 99 | 0/1 | 0/1 | 0/1 | match | match | match |
| 198564 | Agilent38MB | 10:82033470 | 3'UTR    | G/G | 4.22E-15 | 26  | 69 | 30 | 81 | 0/0 | 0/0 | 0/0 | match | match | match |
| 108971 | TruSeqV2    | 10:82034839 | synon    | T/T | 4.44E-16 | 129 | 99 | 28 | 69 | 0/0 | 0/0 | 0/0 | match | match | match |
| 115239 | TruSeqV2    | 10:82034839 | synon    | T/T | 4.44E-16 | 67  | 99 | 17 | 33 | 0/0 | 0/0 | 0/0 | match | match | match |
| 132306 | Agilent38MB | 10:82034839 | synon    | T/T | 2.22E-16 | 13  | 39 | 24 | 69 | 0/0 | 0/0 | 0/0 | match | match | match |
| 163383 | TruSeqV2    | 10:82034839 | synon    | T/T | 4.44E-16 | 87  | 99 | 31 | 84 | 0/0 | 0/0 | 0/0 | match | match | match |
| 198564 | Agilent38MB | 10:82034839 | synon    | T/T | 1.78E-15 | 15  | 45 | 25 | 54 | 0/0 | 0/0 | 0/0 | match | match | match |
| 108971 | TruSeqV2    | 10:82034933 | missense | C/C | 2.22E-16 | 110 | 99 | 38 | 99 | 0/0 | 0/0 | 0/0 | match | match | match |
| 115239 | TruSeqV2    | 10:82034933 | missense | C/C | 4.44E-16 | 79  | 99 | 15 | 42 | 0/0 | 0/0 | 0/0 | match | match | match |
| 132306 | Agilent38MB | 10:82034933 | missense | C/C | 2.22E-16 | 44  | 99 | 36 | 96 | 0/0 | 0/0 | 0/0 | match | match | match |
| 163383 | TruSeqV2    | 10:82034933 | missense | C/C | 2.22E-16 | 97  | 99 | 40 | 99 | 0/0 | 0/0 | 0/0 | match | match | match |
| 198564 | Agilent38MB | 10:82034933 | missense | C/C | 5.33E-15 | 117 | 99 | 45 | 99 | 0/0 | 0/0 | 0/0 | match | match | match |
| 108971 | TruSeqV2    | 10:82035150 | intronic | A/A | 9.99E-15 | 7   | 18 | 55 | 99 | 0/0 | 0/0 | 0/0 | match | match | match |
| 115239 | TruSeqV2    | 10:82035150 | intronic | T/T | 4.44E-16 | 4   | 12 | 25 | 75 | 1/1 | 1/1 | 1/1 | match | match | match |
| 132306 | Agilent38MB | 10:82035150 | intronic | A/A | 1.69E-14 | 1   | 3  | 39 | 99 | 0/0 | 0/0 | 0/0 | match | match | match |
| 163383 | TruSeqV2    | 10:82035150 | intronic | T/T | 4.44E-16 | 3   | 9  | 44 | 99 | 1/1 | 1/1 | 1/1 | match | match | match |
| 108971 | TruSeqV2    | 10:82035173 | intronic | T/T | 6.66E-16 | 5   | 0  | 54 | 99 | 0/0 | 0/0 | 0/0 | match | match | match |
| 115239 | TruSeqV2    | 10:82035173 | intronic | T/T | 2.89E-15 | 4   | 9  | 25 | 66 | 0/0 | 0/0 | 0/0 | match | match | match |
| 132306 | Agilent38MB | 10:82035173 | intronic | T/T | 4.44E-16 | 2   | 6  | 35 | 87 | 0/0 | 0/0 | 0/0 | match | match | match |
| 198564 | Agilent38MB | 10:82035173 | intronic | T/T | 8.88E-16 | 2   | 6  | 43 | 99 | 0/0 | 0/0 | 0/0 | match | match | match |
| 132306 | Agilent38MB | 10:82035560 | intronic | C/C | 2.22E-16 | 3   | 9  | 35 | 90 | 0/0 | 0/0 | 0/0 | match | match | match |

|        |             |             |          |     |          |     |    |    |    |     |     |     |       |       |       |
|--------|-------------|-------------|----------|-----|----------|-----|----|----|----|-----|-----|-----|-------|-------|-------|
| 198564 | Agilent38MB | 10:82035560 | intronic | T/C | 6.66E-16 | 4   | 37 | 56 | 99 | 0/1 | 0/1 | 0/1 | match | match | match |
| 108971 | TruSeqV2    | 10:94824145 | missense | G/G | 8.22E-15 | 108 | 99 | 30 | 84 | 0/0 | 0/0 | 0/0 | match | match | match |
| 115239 | TruSeqV2    | 10:94824145 | missense | G/G | 4.00E-15 | 76  | 99 | 15 | 39 | 0/0 | 0/0 | 0/0 | match | match | match |
| 132306 | Agilent38MB | 10:94824145 | missense | G/G | 6.22E-15 | 49  | 99 | 46 | 99 | 0/0 | 0/0 | 0/0 | match | match | match |
| 163383 | TruSeqV2    | 10:94824145 | missense | G/G | 1.78E-15 | 98  | 99 | 40 | 99 | 0/0 | 0/0 | 0/0 | match | match | match |
| 198564 | Agilent38MB | 10:94824145 | missense | G/G | 4.44E-16 | 72  | 99 | 43 | 99 | 0/0 | 0/0 | 0/0 | match | match | match |
| 108971 | TruSeqV2    | 10:94836881 | synon    | C/C | 1.18E-14 | 239 | 99 | 40 | 99 | 0/0 | 0/0 | 0/0 | match | match | match |
| 115239 | TruSeqV2    | 10:94836881 | synon    | C/C | 2.26E-14 | 151 | 99 | 36 | 99 | 0/0 | 0/0 | 0/0 | match | match | match |
| 132306 | Agilent38MB | 10:94836881 | synon    | C/C | 4.44E-16 | 59  | 99 | 41 | 99 | 0/0 | 0/0 | 0/0 | match | match | match |
| 163383 | TruSeqV2    | 10:94836881 | synon    | C/C | 1.55E-15 | 210 | 99 | 43 | 99 | 0/0 | 0/0 | 0/0 | match | match | match |
| 198564 | Agilent38MB | 10:94836881 | synon    | C/C | 1.62E-14 | 100 | 99 | 46 | 99 | 0/0 | 0/0 | 0/0 | match | match | match |
| 198564 | Agilent38MB | 10:94839724 | 3'UTR    | G/G | 3.33E-15 | 3   | 9  | 37 | 99 | 0/0 | 0/0 | 0/0 | match | match | match |
| 198564 | Agilent38MB | 10:94841988 | 3'UTR    | C/C | 2.22E-15 | 3   | 9  | 51 | 99 | 0/0 | 0/0 | 0/0 | match | match | match |
| 108971 | TruSeqV2    | 10:96447562 | stop     | T/T | 4.44E-16 | 185 | 99 | 41 | 99 | 0/0 | 0/0 | 0/0 | match | match | match |
| 115239 | TruSeqV2    | 10:96447562 | stop     | T/T | 6.66E-16 | 121 | 99 | 38 | 93 | 0/0 | 0/0 | 0/0 | match | match | match |
| 132306 | Agilent38MB | 10:96447562 | stop     | T/T | 8.88E-16 | 312 | 99 | 34 | 90 | 0/0 | 0/0 | 0/0 | match | match | match |
| 163383 | TruSeqV2    | 10:96447562 | stop     | T/T | 8.88E-16 | 136 | 99 | 29 | 84 | 0/0 | 0/0 | 0/0 | match | match | match |
| 198564 | Agilent38MB | 10:96447562 | stop     | T/T | 3.33E-15 | 662 | 99 | 28 | 66 | 0/0 | 0/0 | 0/0 | match | match | match |
| 108971 | TruSeqV2    | 10:96454774 | fs       | -/- | 4.44E-16 | 23  | 60 | 34 | 87 | 0/0 | 0/0 | 0/0 | match | match | match |
| 115239 | TruSeqV2    | 10:96454774 | fs       | -/- | 8.88E-16 | 23  | 60 | 34 | 87 | 0/0 | 0/0 | 0/0 | match | match | match |
| 132306 | Agilent38MB | 10:96454774 | fs       | -/- | 4.44E-16 | 23  | 60 | 34 | 87 | 0/0 | 0/0 | 0/0 | match | match | match |
| 163383 | TruSeqV2    | 10:96454774 | fs       | -/- | 8.88E-16 | 23  | 60 | 34 | 87 | 0/0 | 0/0 | 0/0 | match | match | match |
| 198564 | Agilent38MB | 10:96454774 | fs       | -/- | 4.22E-15 | 23  | 60 | 34 | 87 | 0/0 | 0/0 | 0/0 | match | match | match |
| 108971 | TruSeqV2    | 10:96466592 | missense | A/A | 2.22E-16 | 22  | 63 | 55 | 99 | 0/0 | 0/0 | 0/0 | match | match | match |
| 115239 | TruSeqV2    | 10:96466592 | missense | A/A | 4.44E-16 | 23  | 60 | 71 | 99 | 0/0 | 0/0 | 0/0 | match | match | match |
| 132306 | Agilent38MB | 10:96466592 | missense | A/A | 2.22E-16 | 33  | 85 | 44 | 99 | 0/0 | 0/0 | 0/0 | match | match | match |
| 163383 | TruSeqV2    | 10:96466592 | missense | A/A | 6.66E-16 | 27  | 75 | 63 | 99 | 0/0 | 0/0 | 0/0 | match | match | match |
| 198564 | Agilent38MB | 10:96466592 | missense | A/A | 2.44E-15 | 62  | 99 | 61 | 99 | 0/0 | 0/0 | 0/0 | match | match | match |
| 108971 | TruSeqV2    | 10:96493058 | missense | C/C | 4.44E-16 | 96  | 99 | 38 | 99 | 0/0 | 0/0 | 0/0 | match | match | match |
| 115239 | TruSeqV2    | 10:96493058 | missense | C/C | 1.33E-15 | 61  | 99 | 32 | 73 | 0/0 | 0/0 | 0/0 | match | match | match |
| 132306 | Agilent38MB | 10:96493058 | missense | C/C | 4.44E-16 | 181 | 99 | 28 | 84 | 0/0 | 0/0 | 0/0 | match | match | match |
| 163383 | TruSeqV2    | 10:96493058 | missense | C/C | 4.44E-16 | 50  | 99 | 37 | 99 | 0/0 | 0/0 | 0/0 | match | match | match |
| 198564 | Agilent38MB | 10:96493058 | missense | C/T | 2.07E-14 | 301 | 99 | 50 | 99 | 0/1 | 0/1 | 0/1 | match | match | match |
| 108971 | TruSeqV2    | 10:96495232 | 3'UTR    | T/T | 2.45E-13 | 236 | 99 | 39 | 99 | 1/1 | 1/1 | 1/1 | match | match | match |
| 115239 | TruSeqV2    | 10:96495232 | 3'UTR    | C/C | 1.02E-14 | 175 | 99 | 54 | 99 | 0/0 | 0/0 | 0/0 | match | match | match |
| 132306 | Agilent38MB | 10:96495232 | 3'UTR    | C/T | 5.56E-13 | 114 | 99 | 35 | 99 | 0/1 | 0/1 | 0/1 | match | match | match |
| 163383 | TruSeqV2    | 10:96495232 | 3'UTR    | T/T | 4.88E-14 | 217 | 99 | 45 | 99 | 1/1 | 1/1 | 1/1 | match | match | match |
| 198564 | Agilent38MB | 10:96495232 | 3'UTR    | C/T | 2.56E-11 | 246 | 99 | 40 | 99 | 0/1 | 0/1 | 0/1 | match | match | match |



|        |             |             |          |     |          |     |    |    |    |     |     |     |       |       |       |
|--------|-------------|-------------|----------|-----|----------|-----|----|----|----|-----|-----|-----|-------|-------|-------|
| 108971 | TruSeqV2    | 10:96495793 | 3'UTR    | C/C | 4.22E-15 | 111 | 99 | 40 | 99 | 0/0 | 0/0 | 0/0 | match | match | match |
| 115239 | TruSeqV2    | 10:96495793 | 3'UTR    | C/C | 5.55E-15 | 61  | 99 | 54 | 99 | 0/0 | 0/0 | 0/0 | match | match | match |
| 163383 | TruSeqV2    | 10:96495793 | 3'UTR    | C/C | 8.88E-16 | 99  | 99 | 48 | 99 | 0/0 | 0/0 | 0/0 | match | match | match |
| 198564 | Agilent38MB | 10:96521657 | promoter | C/C | 6.66E-16 | 1   | 3  | 48 | 99 | 0/0 | 0/0 | 0/0 | match | match | match |
| 108971 | TruSeqV2    | 10:96522463 | missense | A/A | 6.66E-16 | 95  | 99 | 49 | 99 | 0/0 | 0/0 | 0/0 | match | match | match |
| 115239 | TruSeqV2    | 10:96522463 | missense | A/A | 1.78E-15 | 68  | 99 | 44 | 99 | 0/0 | 0/0 | 0/0 | match | match | match |
| 132306 | Agilent38MB | 10:96522463 | missense | A/A | 2.22E-16 | 80  | 99 | 42 | 99 | 0/0 | 0/0 | 0/0 | match | match | match |
| 163383 | TruSeqV2    | 10:96522463 | missense | A/A | 1.33E-15 | 96  | 99 | 43 | 99 | 0/0 | 0/0 | 0/0 | match | match | match |
| 198564 | Agilent38MB | 10:96522463 | missense | A/A | 3.77E-15 | 203 | 99 | 43 | 99 | 0/0 | 0/0 | 0/0 | match | match | match |
| 108971 | TruSeqV2    | 10:96522512 | missense | T/T | 1.02E-14 | 147 | 99 | 51 | 99 | 0/0 | 0/0 | 0/0 | match | match | match |
| 115239 | TruSeqV2    | 10:96522512 | missense | T/T | 4.44E-15 | 94  | 99 | 38 | 99 | 0/0 | 0/0 | 0/0 | match | match | match |
| 132306 | Agilent38MB | 10:96522512 | missense | T/T | 5.11E-15 | 57  | 99 | 39 | 99 | 0/0 | 0/0 | 0/0 | match | match | match |
| 163383 | TruSeqV2    | 10:96522512 | missense | T/T | 2.95E-14 | 145 | 99 | 50 | 99 | 0/0 | 0/0 | 0/0 | match | match | match |
| 198564 | Agilent38MB | 10:96522512 | missense | T/T | 2.23E-12 | 108 | 99 | 49 | 99 | 0/0 | 0/0 | 0/0 | match | match | match |
| 108971 | TruSeqV2    | 10:96522517 | missense | A/A | 1.83E-09 | 148 | 99 | 52 | 99 | 0/0 | 0/0 | 0/0 | match | match | match |
| 115239 | TruSeqV2    | 10:96522517 | missense | A/A | 4.98E-09 | 96  | 99 | 39 | 99 | 0/0 | 0/0 | 0/0 | match | match | match |
| 132306 | Agilent38MB | 10:96522517 | missense | A/A | 1.29E-14 | 57  | 99 | 40 | 99 | 0/0 | 0/0 | 0/0 | match | match | match |
| 163383 | TruSeqV2    | 10:96522517 | missense | A/A | 1.83E-05 | 151 | 99 | 47 | 99 | 0/0 | 0/0 | 0/0 | match | match | match |
| 198564 | Agilent38MB | 10:96522517 | missense | A/A | 4.03E-12 | 91  | 99 | 48 | 99 | 0/0 | 0/0 | 0/0 | match | match | match |
| 108971 | TruSeqV2    | 10:96534922 | missense | G/G | 4.44E-16 | 173 | 99 | 45 | 99 | 0/0 | 0/0 | 0/0 | match | match | match |
| 115239 | TruSeqV2    | 10:96534922 | missense | G/G | 4.44E-16 | 137 | 99 | 40 | 99 | 0/0 | 0/0 | 0/0 | match | match | match |
| 132306 | Agilent38MB | 10:96534922 | missense | G/G | 4.44E-16 | 320 | 99 | 39 | 99 | 0/0 | 0/0 | 0/0 | match | match | match |
| 163383 | TruSeqV2    | 10:96534922 | missense | G/G | 4.44E-16 | 146 | 99 | 27 | 66 | 0/0 | 0/0 | 0/0 | match | match | match |
| 198564 | Agilent38MB | 10:96534922 | missense | G/G | 1.24E-14 | 497 | 99 | 31 | 72 | 0/0 | 0/0 | 0/0 | match | match | match |
| 108971 | TruSeqV2    | 10:96535173 | missense | T/T | 7.55E-15 | 181 | 99 | 39 | 83 | 0/0 | 0/0 | 0/0 | match | match | match |
| 115239 | TruSeqV2    | 10:96535173 | missense | T/T | 2.22E-16 | 169 | 99 | 39 | 99 | 0/0 | 0/0 | 0/0 | match | match | match |
| 132306 | Agilent38MB | 10:96535173 | missense | T/T | 6.22E-15 | 131 | 99 | 40 | 99 | 0/0 | 0/0 | 0/0 | match | match | match |
| 163383 | TruSeqV2    | 10:96535173 | missense | T/T | 3.33E-15 | 202 | 99 | 34 | 99 | 0/0 | 0/0 | 0/0 | match | match | match |
| 198564 | Agilent38MB | 10:96535173 | missense | T/T | 2.89E-15 | 278 | 99 | 43 | 99 | 0/0 | 0/0 | 0/0 | match | match | match |
| 108971 | TruSeqV2    | 10:96535210 | missense | G/G | 2.22E-16 | 180 | 99 | 38 | 99 | 0/0 | 0/0 | 0/0 | match | match | match |
| 115239 | TruSeqV2    | 10:96535210 | missense | G/G | 2.22E-16 | 176 | 99 | 27 | 66 | 0/0 | 0/0 | 0/0 | match | match | match |
| 132306 | Agilent38MB | 10:96535210 | missense | G/G | 2.22E-16 | 182 | 99 | 42 | 99 | 0/0 | 0/0 | 0/0 | match | match | match |
| 163383 | TruSeqV2    | 10:96535210 | missense | G/G | 2.22E-16 | 218 | 99 | 38 | 99 | 0/0 | 0/0 | 0/0 | match | match | match |
| 198564 | Agilent38MB | 10:96535210 | missense | G/G | 2.22E-16 | 359 | 99 | 35 | 96 | 0/0 | 0/0 | 0/0 | match | match | match |
| 108971 | TruSeqV2    | 10:96535246 | missense | G/G | 6.10E-10 | 138 | 99 | 45 | 99 | 0/0 | 0/0 | 0/0 | match | match | match |
| 115239 | TruSeqV2    | 10:96535246 | missense | G/G | 3.73E-14 | 120 | 99 | 20 | 51 | 0/0 | 0/0 | 0/0 | match | match | match |
| 132306 | Agilent38MB | 10:96535246 | missense | G/G | 1.19E-13 | 241 | 99 | 38 | 99 | 0/0 | 0/0 | 0/0 | match | match | match |
| 163383 | TruSeqV2    | 10:96535246 | missense | G/G | 1.48E-12 | 163 | 99 | 41 | 99 | 0/0 | 0/0 | 0/0 | match | match | match |

|        |             |             |          |     |          |     |    |    |    |     |     |     |       |       |       |
|--------|-------------|-------------|----------|-----|----------|-----|----|----|----|-----|-----|-----|-------|-------|-------|
| 198564 | Agilent38MB | 10:96535246 | missense | G/G | 1.50E-12 | 487 | 99 | 24 | 72 | 0/0 | 0/0 | 0/0 | match | match | match |
| 108971 | TruSeqV2    | 10:96540410 | stop     | G/G | 6.88E-15 | 23  | 57 | 33 | 87 | 0/0 | 0/0 | 0/0 | match | match | match |
| 115239 | TruSeqV2    | 10:96540410 | stop     | G/G | 2.66E-15 | 23  | 63 | 49 | 99 | 0/0 | 0/0 | 0/0 | match | match | match |
| 132306 | Agilent38MB | 10:96540410 | stop     | G/G | 8.88E-16 | 173 | 99 | 41 | 99 | 0/0 | 0/0 | 0/0 | match | match | match |
| 163383 | TruSeqV2    | 10:96540410 | stop     | G/G | 1.55E-15 | 28  | 81 | 36 | 92 | 0/0 | 0/0 | 0/0 | match | match | match |
| 198564 | Agilent38MB | 10:96540410 | stop     | G/G | 3.48E-13 | 256 | 99 | 45 | 99 | 0/0 | 0/0 | 0/0 | match | match | match |
| 108971 | TruSeqV2    | 10:96541615 | missense | C/C | 3.11E-15 | 39  | 99 | 47 | 99 | 0/0 | 0/0 | 0/0 | match | match | match |
| 115239 | TruSeqV2    | 10:96541615 | missense | C/C | 1.18E-14 | 27  | 75 | 47 | 99 | 0/0 | 0/0 | 0/0 | match | match | match |
| 132306 | Agilent38MB | 10:96541615 | missense | C/C | 1.78E-15 | 11  | 33 | 36 | 99 | 0/0 | 0/0 | 0/0 | match | match | match |
| 163383 | TruSeqV2    | 10:96541615 | missense | C/C | 2.89E-15 | 32  | 93 | 55 | 99 | 0/0 | 0/0 | 0/0 | match | match | match |
| 198564 | Agilent38MB | 10:96541615 | missense | C/C | 1.55E-15 | 18  | 54 | 46 | 99 | 0/0 | 0/0 | 0/0 | match | match | match |
| 108971 | TruSeqV2    | 10:96541616 | synon    | G/G | 1.33E-15 | 40  | 99 | 45 | 99 | 0/0 | 0/0 | 0/0 | match | match | match |
| 115239 | TruSeqV2    | 10:96541616 | synon    | G/G | 2.89E-15 | 27  | 75 | 46 | 99 | 0/0 | 0/0 | 0/0 | match | match | match |
| 132306 | Agilent38MB | 10:96541616 | synon    | G/G | 6.66E-16 | 11  | 33 | 35 | 99 | 0/0 | 0/0 | 0/0 | match | match | match |
| 163383 | TruSeqV2    | 10:96541616 | synon    | G/G | 1.33E-15 | 34  | 99 | 54 | 99 | 0/0 | 0/0 | 0/0 | match | match | match |
| 198564 | Agilent38MB | 10:96541616 | synon    | A/G | 2.64E-13 | 17  | 22 | 46 | 99 | 0/1 | 0/1 | 0/1 | match | match | match |
| 108971 | TruSeqV2    | 10:96541656 | fs       | -/- | 6.66E-16 | 60  | 99 | 40 | 99 | 0/0 | 0/0 | 0/0 | match | match | match |
| 115239 | TruSeqV2    | 10:96541656 | fs       | -/- | 6.66E-16 | 60  | 99 | 40 | 99 | 0/0 | 0/0 | 0/0 | match | match | match |
| 132306 | Agilent38MB | 10:96541656 | fs       | -/- | 4.44E-16 | 60  | 99 | 40 | 99 | 0/0 | 0/0 | 0/0 | match | match | match |
| 163383 | TruSeqV2    | 10:96541656 | fs       | -/- | 8.88E-16 | 60  | 99 | 40 | 99 | 0/0 | 0/0 | 0/0 | match | match | match |
| 198564 | Agilent38MB | 10:96541656 | fs       | -/- | 8.88E-16 | 60  | 99 | 40 | 99 | 0/0 | 0/0 | 0/0 | match | match | match |
| 108971 | TruSeqV2    | 10:96541756 | splice   | T/T | 2.22E-16 | 35  | 90 | 41 | 99 | 0/0 | 0/0 | 0/0 | match | match | match |
| 115239 | TruSeqV2    | 10:96541756 | splice   | T/T | 2.22E-16 | 35  | 93 | 43 | 99 | 0/0 | 0/0 | 0/0 | match | match | match |
| 132306 | Agilent38MB | 10:96541756 | splice   | T/T | 4.44E-16 | 181 | 99 | 35 | 90 | 0/0 | 0/0 | 0/0 | match | match | match |
| 163383 | TruSeqV2    | 10:96541756 | splice   | T/T | 2.22E-16 | 48  | 99 | 48 | 99 | 0/0 | 0/0 | 0/0 | match | match | match |
| 198564 | Agilent38MB | 10:96541756 | splice   | T/T | 4.44E-16 | 268 | 99 | 51 | 99 | 0/0 | 0/0 | 0/0 | match | match | match |
| 108971 | TruSeqV2    | 10:96602623 | missense | G/G | 6.66E-16 | 55  | 99 | 47 | 99 | 0/0 | 0/0 | 0/0 | match | match | match |
| 115239 | TruSeqV2    | 10:96602623 | missense | G/G | 1.33E-15 | 39  | 99 | 37 | 99 | 0/0 | 0/0 | 0/0 | match | match | match |
| 132306 | Agilent38MB | 10:96602623 | missense | G/G | 6.66E-16 | 276 | 99 | 31 | 84 | 0/0 | 0/0 | 0/0 | match | match | match |
| 163383 | TruSeqV2    | 10:96602623 | missense | G/G | 6.66E-16 | 46  | 99 | 52 | 99 | 0/0 | 0/0 | 0/0 | match | match | match |
| 198564 | Agilent38MB | 10:96602623 | missense | G/G | 2.44E-15 | 533 | 99 | 53 | 99 | 0/0 | 0/0 | 0/0 | match | match | match |
| 108971 | TruSeqV2    | 10:96609752 | missense | C/C | 2.22E-16 | 58  | 99 | 34 | 93 | 0/0 | 0/0 | 0/0 | match | match | match |
| 115239 | TruSeqV2    | 10:96609752 | missense | C/C | 2.22E-16 | 42  | 99 | 47 | 99 | 0/0 | 0/0 | 0/0 | match | match | match |
| 132306 | Agilent38MB | 10:96609752 | missense | C/C | 2.22E-16 | 256 | 99 | 31 | 87 | 0/0 | 0/0 | 0/0 | match | match | match |
| 163383 | TruSeqV2    | 10:96609752 | missense | C/C | 2.22E-16 | 44  | 99 | 51 | 99 | 0/0 | 0/0 | 0/0 | match | match | match |
| 198564 | Agilent38MB | 10:96609752 | missense | C/C | 2.22E-16 | 356 | 99 | 43 | 99 | 0/0 | 0/0 | 0/0 | match | match | match |
| 108971 | TruSeqV2    | 10:96612495 | missense | C/C | 1.11E-13 | 126 | 99 | 42 | 99 | 0/0 | 0/0 | 0/0 | match | match | match |
| 115239 | TruSeqV2    | 10:96612495 | missense | C/C | 2.93E-12 | 77  | 99 | 41 | 99 | 0/0 | 0/0 | 0/0 | match | match | match |

|        |             |             |           |          |          |     |    |    |    |     |     |     |       |       |       |
|--------|-------------|-------------|-----------|----------|----------|-----|----|----|----|-----|-----|-----|-------|-------|-------|
| 132306 | Agilent38MB | 10:96612495 | missense  | C/C      | 2.40E-12 | 222 | 99 | 43 | 99 | 0/0 | 0/0 | 0/0 | match | match | match |
| 163383 | TruSeqV2    | 10:96612495 | missense  | C/C      | 1.08E-12 | 127 | 99 | 38 | 93 | 0/0 | 0/0 | 0/0 | match | match | match |
| 198564 | Agilent38MB | 10:96612495 | missense  | C/C      | 1.31E-13 | 344 | 99 | 53 | 99 | 0/0 | 0/0 | 0/0 | match | match | match |
| 108971 | TruSeqV2    | 10:96612514 | fs        | G/G      | 2.22E-16 | 137 | 99 | 40 | 93 | 0/0 | 0/0 | 0/0 | match | match | match |
| 115239 | TruSeqV2    | 10:96612514 | fs        | G/G      | 2.22E-16 | 137 | 99 | 40 | 93 | 0/0 | 0/0 | 0/0 | match | match | match |
| 132306 | Agilent38MB | 10:96612514 | fs        | G/G      | 4.44E-16 | 137 | 99 | 40 | 93 | 0/0 | 0/0 | 0/0 | match | match | match |
| 163383 | TruSeqV2    | 10:96612514 | fs        | G/G      | 2.22E-16 | 137 | 99 | 40 | 93 | 0/0 | 0/0 | 0/0 | match | match | match |
| 198564 | Agilent38MB | 10:96612514 | fs        | G/G      | 2.22E-16 | 137 | 99 | 40 | 93 | 0/0 | 0/0 | 0/0 | match | match | match |
| 108971 | TruSeqV2    | 10:96612671 | stop loss | A/A      | 8.88E-16 | 148 | 99 | 29 | 81 | 0/0 | 0/0 | 0/0 | match | match | match |
| 115239 | TruSeqV2    | 10:96612671 | stop loss | A/A      | 1.33E-15 | 107 | 99 | 43 | 99 | 0/0 | 0/0 | 0/0 | match | match | match |
| 132306 | Agilent38MB | 10:96612671 | stop loss | A/A      | 8.88E-16 | 122 | 99 | 39 | 99 | 0/0 | 0/0 | 0/0 | match | match | match |
| 163383 | TruSeqV2    | 10:96612671 | stop loss | A/A      | 4.44E-16 | 155 | 99 | 31 | 90 | 0/0 | 0/0 | 0/0 | match | match | match |
| 198564 | Agilent38MB | 10:96612671 | stop loss | A/A      | 3.11E-15 | 241 | 99 | 41 | 99 | 0/0 | 0/0 | 0/0 | match | match | match |
| 108971 | TruSeqV2    | 10:96701715 | missense  | T/T      | 4.44E-16 | 217 | 99 | 33 | 90 | 0/0 | 0/0 | 0/0 | match | match | match |
| 115239 | TruSeqV2    | 10:96701715 | missense  | T/T      | 8.88E-16 | 157 | 99 | 39 | 99 | 0/0 | 0/0 | 0/0 | match | match | match |
| 132306 | Agilent38MB | 10:96701715 | missense  | T/T      | 2.22E-16 | 372 | 99 | 29 | 78 | 0/0 | 0/0 | 0/0 | match | match | match |
| 163383 | TruSeqV2    | 10:96701715 | missense  | T/T      | 2.22E-16 | 161 | 99 | 43 | 99 | 0/0 | 0/0 | 0/0 | match | match | match |
| 198564 | Agilent38MB | 10:96701715 | missense  | T/T      | 6.22E-15 | 636 | 99 | 43 | 99 | 0/0 | 0/0 | 0/0 | match | match | match |
|        |             |             |           | AGAAATG  |          |     |    |    |    |     |     |     |       |       |       |
|        |             |             |           | GAA/AGAA |          |     |    |    |    |     |     |     |       |       |       |
| 108971 | TruSeqV2    | 10:96701970 | fs        | ATGGAA   | 6.66E-16 | 169 | 99 | 44 | 99 | 0/0 | 0/0 | 0/0 | match | match | match |
|        |             |             |           | AGAAATG  |          |     |    |    |    |     |     |     |       |       |       |
|        |             |             |           | GAA/AGAA |          |     |    |    |    |     |     |     |       |       |       |
| 115239 | TruSeqV2    | 10:96701970 | fs        | ATGGAA   | 9.66E-12 | 169 | 99 | 44 | 99 | 0/0 | 0/0 | 0/0 | match | match | match |
|        |             |             |           | AGAAATG  |          |     |    |    |    |     |     |     |       |       |       |
|        |             |             |           | GAA/AGAA |          |     |    |    |    |     |     |     |       |       |       |
| 132306 | Agilent38MB | 10:96701970 | fs        | ATGGAA   | 4.40E-14 | 169 | 99 | 44 | 99 | 0/0 | 0/0 | 0/0 | match | match | match |
|        |             |             |           | AGAAATG  |          |     |    |    |    |     |     |     |       |       |       |
|        |             |             |           | GAA/AGAA |          |     |    |    |    |     |     |     |       |       |       |
| 163383 | TruSeqV2    | 10:96701970 | fs        | ATGGAA   | 3.09E-10 | 169 | 99 | 44 | 99 | 0/0 | 0/0 | 0/0 | match | match | match |
|        |             |             |           | AGAAATG  |          |     |    |    |    |     |     |     |       |       |       |
|        |             |             |           | GAA/AGAA |          |     |    |    |    |     |     |     |       |       |       |
| 198564 | Agilent38MB | 10:96701970 | fs        | ATGGAA   | 9.99E-10 | 169 | 99 | 44 | 99 | 0/0 | 0/0 | 0/0 | match | match | match |
| 108971 | TruSeqV2    | 10:96701991 | missense  | G/G      | 2.49E-14 | 184 | 99 | 38 | 99 | 0/0 | 0/0 | 0/0 | match | match | match |
| 115239 | TruSeqV2    | 10:96701991 | missense  | G/G      | 4.44E-16 | 137 | 99 | 35 | 90 | 0/0 | 0/0 | 0/0 | match | match | match |
| 132306 | Agilent38MB | 10:96701991 | missense  | G/G      | 1.13E-14 | 113 | 99 | 39 | 99 | 0/0 | 0/0 | 0/0 | match | match | match |
| 163383 | TruSeqV2    | 10:96701991 | missense  | G/G      | 8.88E-16 | 159 | 99 | 42 | 99 | 0/0 | 0/0 | 0/0 | match | match | match |
| 198564 | Agilent38MB | 10:96701991 | missense  | G/G      | 5.11E-15 | 280 | 99 | 55 | 99 | 0/0 | 0/0 | 0/0 | match | match | match |

|        |             |             |          |     |          |     |    |    |    |     |     |     |       |       |       |
|--------|-------------|-------------|----------|-----|----------|-----|----|----|----|-----|-----|-----|-------|-------|-------|
| 108971 | TruSeqV2    | 10:96702047 | missense | C/T | 2.44E-15 | 137 | 99 | 23 | 99 | 0/1 | 0/1 | 0/1 | match | match | match |
| 115239 | TruSeqV2    | 10:96702047 | missense | C/C | 4.44E-16 | 103 | 99 | 19 | 30 | 0/0 | 0/0 | 0/0 | match | match | match |
| 132306 | Agilent38MB | 10:96702047 | missense | C/C | 2.22E-16 | 212 | 99 | 36 | 99 | 0/0 | 0/0 | 0/0 | match | match | match |
| 163383 | TruSeqV2    | 10:96702047 | missense | C/T | 2.71E-14 | 117 | 99 | 49 | 99 | 0/1 | 0/1 | 0/1 | match | match | match |
| 198564 | Agilent38MB | 10:96702047 | missense | C/C | 4.44E-16 | 436 | 99 | 32 | 81 | 0/0 | 0/0 | 0/0 | match | match | match |
| 108971 | TruSeqV2    | 10:96707539 | stop     | C/C | 8.88E-16 | 55  | 99 | 41 | 90 | 0/0 | 0/0 | 0/0 | match | match | match |
| 115239 | TruSeqV2    | 10:96707539 | stop     | C/C | 1.55E-15 | 42  | 99 | 45 | 99 | 0/0 | 0/0 | 0/0 | match | match | match |
| 132306 | Agilent38MB | 10:96707539 | stop     | C/C | 4.44E-16 | 243 | 99 | 30 | 81 | 0/0 | 0/0 | 0/0 | match | match | match |
| 163383 | TruSeqV2    | 10:96707539 | stop     | C/C | 6.66E-16 | 43  | 99 | 51 | 99 | 0/0 | 0/0 | 0/0 | match | match | match |
| 198564 | Agilent38MB | 10:96707539 | stop     | C/C | 2.44E-15 | 410 | 99 | 46 | 99 | 0/0 | 0/0 | 0/0 | match | match | match |
| 108971 | TruSeqV2    | 10:96708974 | missense | A/A | 6.66E-16 | 77  | 99 | 40 | 99 | 0/0 | 0/0 | 0/0 | match | match | match |
| 115239 | TruSeqV2    | 10:96708974 | missense | A/A | 4.44E-16 | 50  | 99 | 42 | 99 | 0/0 | 0/0 | 0/0 | match | match | match |
| 132306 | Agilent38MB | 10:96708974 | missense | A/A | 6.66E-16 | 98  | 99 | 40 | 99 | 0/0 | 0/0 | 0/0 | match | match | match |
| 163383 | TruSeqV2    | 10:96708974 | missense | A/A | 6.66E-16 | 57  | 99 | 48 | 99 | 0/0 | 0/0 | 0/0 | match | match | match |
| 198564 | Agilent38MB | 10:96708974 | missense | A/A | 1.33E-15 | 179 | 99 | 47 | 99 | 0/0 | 0/0 | 0/0 | match | match | match |
| 108971 | TruSeqV2    | 10:96709037 | missense | A/A | 6.06E-14 | 68  | 99 | 43 | 99 | 0/0 | 0/0 | 0/0 | match | match | match |
| 115239 | TruSeqV2    | 10:96709037 | missense | A/A | 1.95E-14 | 44  | 99 | 36 | 90 | 0/0 | 0/0 | 0/0 | match | match | match |
| 132306 | Agilent38MB | 10:96709037 | missense | A/A | 3.40E-14 | 135 | 99 | 34 | 81 | 0/0 | 0/0 | 0/0 | match | match | match |
| 163383 | TruSeqV2    | 10:96709037 | missense | A/A | 2.00E-15 | 42  | 99 | 53 | 99 | 0/0 | 0/0 | 0/0 | match | match | match |
| 198564 | Agilent38MB | 10:96709037 | missense | A/A | 1.33E-15 | 249 | 99 | 48 | 99 | 0/0 | 0/0 | 0/0 | match | match | match |
| 108971 | TruSeqV2    | 10:96709039 | fs       | A/A | 2.22E-16 | 70  | 99 | 43 | 99 | 0/0 | 0/0 | 0/0 | match | match | match |
| 115239 | TruSeqV2    | 10:96709039 | fs       | A/A | 2.22E-16 | 70  | 99 | 43 | 99 | 0/0 | 0/0 | 0/0 | match | match | match |
| 132306 | Agilent38MB | 10:96709039 | fs       | A/A | 2.22E-16 | 70  | 99 | 43 | 99 | 0/0 | 0/0 | 0/0 | match | match | match |
| 163383 | TruSeqV2    | 10:96709039 | fs       | A/A | 2.22E-16 | 70  | 99 | 43 | 99 | 0/0 | 0/0 | 0/0 | match | match | match |
| 198564 | Agilent38MB | 10:96709039 | fs       | A/A | 4.44E-16 | 70  | 99 | 43 | 99 | 0/0 | 0/0 | 0/0 | match | match | match |
| 108971 | TruSeqV2    | 10:96731936 | missense | A/A | 1.11E-15 | 152 | 99 | 40 | 99 | 0/0 | 0/0 | 0/0 | match | match | match |
| 115239 | TruSeqV2    | 10:96731936 | missense | A/A | 6.66E-16 | 83  | 99 | 41 | 99 | 0/0 | 0/0 | 0/0 | match | match | match |
| 132306 | Agilent38MB | 10:96731936 | missense | A/A | 6.66E-16 | 244 | 99 | 34 | 90 | 0/0 | 0/0 | 0/0 | match | match | match |
| 163383 | TruSeqV2    | 10:96731936 | missense | A/A | 1.33E-15 | 134 | 99 | 42 | 73 | 0/0 | 0/0 | 0/0 | match | match | match |
| 198564 | Agilent38MB | 10:96731936 | missense | A/A | 2.44E-15 | 481 | 99 | 34 | 93 | 0/0 | 0/0 | 0/0 | match | match | match |
| 108971 | TruSeqV2    | 10:96740981 | missense | C/C | 2.22E-16 | 45  | 99 | 36 | 99 | 0/0 | 0/0 | 0/0 | match | match | match |
| 115239 | TruSeqV2    | 10:96740981 | missense | C/C | 2.22E-16 | 34  | 78 | 43 | 99 | 0/0 | 0/0 | 0/0 | match | match | match |
| 132306 | Agilent38MB | 10:96740981 | missense | C/C | 2.22E-16 | 264 | 99 | 35 | 96 | 0/0 | 0/0 | 0/0 | match | match | match |
| 163383 | TruSeqV2    | 10:96740981 | missense | C/C | 2.22E-16 | 54  | 99 | 21 | 51 | 0/0 | 0/0 | 0/0 | match | match | match |
| 198564 | Agilent38MB | 10:96740981 | missense | C/C | 2.22E-16 | 552 | 99 | 42 | 99 | 0/0 | 0/0 | 0/0 | match | match | match |
| 108971 | TruSeqV2    | 10:96741051 | missense | A/A | 2.22E-15 | 75  | 99 | 34 | 90 | 0/0 | 0/0 | 0/0 | match | match | match |
| 115239 | TruSeqV2    | 10:96741051 | missense | A/A | 2.22E-16 | 50  | 99 | 46 | 99 | 0/0 | 0/0 | 0/0 | match | match | match |
| 132306 | Agilent38MB | 10:96741051 | missense | A/A | 4.44E-16 | 254 | 99 | 44 | 99 | 0/0 | 0/0 | 0/0 | match | match | match |

|        |             |             |          |         |          |     |    |    |    |     |     |     |       |       |       |
|--------|-------------|-------------|----------|---------|----------|-----|----|----|----|-----|-----|-----|-------|-------|-------|
| 163383 | TruSeqV2    | 10:96741051 | missense | A/A     | 1.11E-15 | 77  | 99 | 38 | 81 | 0/0 | 0/0 | 0/0 | match | match | match |
| 198564 | Agilent38MB | 10:96741051 | missense | A/A     | 6.66E-16 | 527 | 99 | 39 | 99 | 0/0 | 0/0 | 0/0 | match | match | match |
| 108971 | TruSeqV2    | 10:96741053 | missense | A/A     | 2.22E-16 | 74  | 99 | 35 | 90 | 0/0 | 0/0 | 0/0 | match | match | match |
| 115239 | TruSeqV2    | 10:96741053 | missense | A/A     | 2.22E-16 | 50  | 99 | 47 | 99 | 0/0 | 0/0 | 0/0 | match | match | match |
| 132306 | Agilent38MB | 10:96741053 | missense | A/A     | 6.66E-16 | 257 | 99 | 45 | 99 | 0/0 | 0/0 | 0/0 | match | match | match |
| 163383 | TruSeqV2    | 10:96741053 | missense | A/A     | 8.88E-16 | 75  | 99 | 39 | 99 | 0/0 | 0/0 | 0/0 | match | match | match |
| 198564 | Agilent38MB | 10:96741053 | missense | A/A     | 1.33E-15 | 545 | 99 | 37 | 96 | 0/0 | 0/0 | 0/0 | match | match | match |
| 108971 | TruSeqV2    | 10:96741054 | missense | T/T     | 1.33E-15 | 73  | 99 | 35 | 90 | 0/0 | 0/0 | 0/0 | match | match | match |
| 115239 | TruSeqV2    | 10:96741054 | missense | T/T     | 6.66E-16 | 50  | 99 | 47 | 99 | 0/0 | 0/0 | 0/0 | match | match | match |
| 132306 | Agilent38MB | 10:96741054 | missense | T/T     | 5.33E-15 | 255 | 99 | 45 | 99 | 0/0 | 0/0 | 0/0 | match | match | match |
| 163383 | TruSeqV2    | 10:96741054 | missense | T/T     | 7.33E-15 | 74  | 99 | 38 | 99 | 0/0 | 0/0 | 0/0 | match | match | match |
| 198564 | Agilent38MB | 10:96741054 | missense | T/T     | 9.33E-15 | 544 | 99 | 37 | 96 | 0/0 | 0/0 | 0/0 | match | match | match |
| 108971 | TruSeqV2    | 10:96741058 | missense | C/C     | 2.22E-16 | 73  | 99 | 33 | 90 | 0/0 | 0/0 | 0/0 | match | match | match |
| 115239 | TruSeqV2    | 10:96741058 | missense | C/C     | 2.22E-16 | 49  | 99 | 49 | 99 | 0/0 | 0/0 | 0/0 | match | match | match |
| 132306 | Agilent38MB | 10:96741058 | missense | C/C     | 2.22E-16 | 253 | 99 | 43 | 99 | 0/0 | 0/0 | 0/0 | match | match | match |
| 163383 | TruSeqV2    | 10:96741058 | missense | C/C     | 2.22E-16 | 70  | 99 | 40 | 99 | 0/0 | 0/0 | 0/0 | match | match | match |
| 198564 | Agilent38MB | 10:96741058 | missense | C/C     | 2.22E-16 | 542 | 99 | 37 | 99 | 0/0 | 0/0 | 0/0 | match | match | match |
| 108971 | TruSeqV2    | 10:96748635 | synon    | C/C     | 6.66E-16 | 181 | 99 | 47 | 99 | 0/0 | 0/0 | 0/0 | match | match | match |
| 115239 | TruSeqV2    | 10:96748635 | synon    | C/C     | 4.44E-16 | 131 | 99 | 37 | 96 | 0/0 | 0/0 | 0/0 | match | match | match |
| 132306 | Agilent38MB | 10:96748635 | synon    | C/C     | 4.44E-16 | 292 | 99 | 47 | 99 | 0/0 | 0/0 | 0/0 | match | match | match |
| 163383 | TruSeqV2    | 10:96748635 | synon    | C/C     | 6.66E-16 | 175 | 99 | 38 | 96 | 0/0 | 0/0 | 0/0 | match | match | match |
| 198564 | Agilent38MB | 10:96748635 | synon    | C/C     | 2.22E-16 | 546 | 99 | 60 | 99 | 0/0 | 0/0 | 0/0 | match | match | match |
| 108971 | TruSeqV2    | 10:96748737 | synon    | A/A     | 6.66E-16 | 313 | 99 | 39 | 99 | 0/0 | 0/0 | 0/0 | match | match | match |
| 115239 | TruSeqV2    | 10:96748737 | synon    | A/A     | 2.22E-16 | 215 | 99 | 38 | 99 | 0/0 | 0/0 | 0/0 | match | match | match |
| 132306 | Agilent38MB | 10:96748737 | synon    | A/A     | 4.44E-16 | 232 | 99 | 42 | 99 | 0/0 | 0/0 | 0/0 | match | match | match |
| 163383 | TruSeqV2    | 10:96748737 | synon    | A/A     | 4.44E-16 | 268 | 99 | 53 | 99 | 0/0 | 0/0 | 0/0 | match | match | match |
| 198564 | Agilent38MB | 10:96748737 | synon    | A/A     | 1.11E-15 | 515 | 99 | 39 | 99 | 0/0 | 0/0 | 0/0 | match | match | match |
| 108971 | TruSeqV2    | 10:96748777 | missense | C/C     | 2.22E-16 | 281 | 99 | 41 | 99 | 0/0 | 0/0 | 0/0 | match | match | match |
| 115239 | TruSeqV2    | 10:96748777 | missense | C/C     | 2.22E-16 | 209 | 99 | 29 | 78 | 0/0 | 0/0 | 0/0 | match | match | match |
| 132306 | Agilent38MB | 10:96748777 | missense | C/C     | 2.22E-16 | 179 | 99 | 36 | 96 | 0/0 | 0/0 | 0/0 | match | match | match |
| 163383 | TruSeqV2    | 10:96748777 | missense | C/C     | 2.22E-16 | 249 | 99 | 42 | 96 | 0/0 | 0/0 | 0/0 | match | match | match |
| 198564 | Agilent38MB | 10:96748777 | missense | C/C     | 4.44E-16 | 473 | 99 | 32 | 84 | 0/0 | 0/0 | 0/0 | match | match | match |
| 108971 | TruSeqV2    | 10:96796796 | 3'UTR    | G/G     | 3.64E-14 | 189 | 99 | 37 | 90 | 0/0 | 0/0 | 0/0 | match | match | match |
| 115239 | TruSeqV2    | 10:96796796 | 3'UTR    | G/G     | 1.62E-14 | 114 | 99 | 51 | 99 | 0/0 | 0/0 | 0/0 | match | match | match |
| 132306 | Agilent38MB | 10:96796796 | 3'UTR    | G/G     | 8.95E-14 | 6   | 18 | 35 | 99 | 0/0 | 0/0 | 0/0 | match | match | match |
| 163383 | TruSeqV2    | 10:96796796 | 3'UTR    | G/G     | 2.66E-15 | 181 | 99 | 36 | 96 | 0/0 | 0/0 | 0/0 | match | match | match |
| 198564 | Agilent38MB | 10:96796796 | 3'UTR    | G/G     | 6.66E-16 | 11  | 30 | 36 | 90 | 0/0 | 0/0 | 0/0 | match | match | match |
| 108971 | TruSeqV2    | 10:96796974 | missense | TTG/TTG | 4.44E-16 | 125 | 99 | 44 | 99 | 0/0 | 0/0 | 0/0 | match | match | match |

|        |             |             |           |         |          |     |    |    |    |     |     |     |       |       |       |
|--------|-------------|-------------|-----------|---------|----------|-----|----|----|----|-----|-----|-----|-------|-------|-------|
| 115239 | TruSeqV2    | 10:96796974 | missense  | TTG/TTG | 8.88E-16 | 125 | 99 | 44 | 99 | 0/0 | 0/0 | 0/0 | match | match | match |
| 132306 | Agilent38MB | 10:96796974 | missense  | TTG/TTG | 1.11E-15 | 125 | 99 | 44 | 99 | 0/0 | 0/0 | 0/0 | match | match | match |
| 163383 | TruSeqV2    | 10:96796974 | missense  | TTG/TTG | 8.88E-16 | 125 | 99 | 44 | 99 | 0/0 | 0/0 | 0/0 | match | match | match |
| 198564 | Agilent38MB | 10:96796974 | missense  | TTG/TTG | 1.55E-15 | 125 | 99 | 44 | 99 | 0/0 | 0/0 | 0/0 | match | match | match |
| 108971 | TruSeqV2    | 10:96798735 | missense  | G/G     | 4.44E-16 | 110 | 99 | 51 | 99 | 0/0 | 0/0 | 0/0 | match | match | match |
| 115239 | TruSeqV2    | 10:96798735 | missense  | G/G     | 8.88E-16 | 47  | 99 | 58 | 99 | 0/0 | 0/0 | 0/0 | match | match | match |
| 132306 | Agilent38MB | 10:96798735 | missense  | G/G     | 4.44E-16 | 97  | 99 | 38 | 77 | 0/0 | 0/0 | 0/0 | match | match | match |
| 163383 | TruSeqV2    | 10:96798735 | missense  | G/G     | 4.44E-16 | 83  | 99 | 37 | 99 | 0/0 | 0/0 | 0/0 | match | match | match |
| 198564 | Agilent38MB | 10:96798735 | missense  | G/G     | 2.02E-14 | 174 | 99 | 49 | 99 | 0/0 | 0/0 | 0/0 | match | match | match |
| 108971 | TruSeqV2    | 10:96798749 | missense  | T/C     | 3.55E-15 | 103 | 99 | 50 | 99 | 0/1 | 0/1 | 0/1 | match | match | match |
| 115239 | TruSeqV2    | 10:96798749 | missense  | T/T     | 2.22E-16 | 48  | 99 | 58 | 99 | 0/0 | 0/0 | 0/0 | match | match | match |
| 132306 | Agilent38MB | 10:96798749 | missense  | T/T     | 2.22E-16 | 111 | 99 | 37 | 99 | 0/0 | 0/0 | 0/0 | match | match | match |
| 163383 | TruSeqV2    | 10:96798749 | missense  | T/C     | 8.22E-15 | 79  | 99 | 39 | 99 | 0/1 | 0/1 | 0/1 | match | match | match |
| 198564 | Agilent38MB | 10:96798749 | missense  | T/T     | 6.66E-16 | 207 | 99 | 51 | 99 | 0/0 | 0/0 | 0/0 | match | match | match |
| 108971 | TruSeqV2    | 10:96798776 | missense  | A/A     | 4.44E-16 | 93  | 99 | 53 | 99 | 0/0 | 0/0 | 0/0 | match | match | match |
| 115239 | TruSeqV2    | 10:96798776 | missense  | A/A     | 4.44E-16 | 44  | 99 | 53 | 99 | 0/0 | 0/0 | 0/0 | match | match | match |
| 132306 | Agilent38MB | 10:96798776 | missense  | A/A     | 1.78E-15 | 117 | 99 | 41 | 85 | 0/0 | 0/0 | 0/0 | match | match | match |
| 163383 | TruSeqV2    | 10:96798776 | missense  | A/A     | 4.44E-16 | 71  | 99 | 52 | 99 | 0/0 | 0/0 | 0/0 | match | match | match |
| 198564 | Agilent38MB | 10:96798776 | missense  | A/A     | 2.22E-16 | 219 | 99 | 52 | 99 | 0/0 | 0/0 | 0/0 | match | match | match |
| 108971 | TruSeqV2    | 10:96818106 | missense  | T/T     | 4.44E-16 | 77  | 99 | 43 | 99 | 0/0 | 0/0 | 0/0 | match | match | match |
| 115239 | TruSeqV2    | 10:96818106 | missense  | T/T     | 4.44E-16 | 48  | 99 | 44 | 99 | 0/0 | 0/0 | 0/0 | match | match | match |
| 132306 | Agilent38MB | 10:96818106 | missense  | T/T     | 6.66E-16 | 182 | 99 | 29 | 66 | 0/0 | 0/0 | 0/0 | match | match | match |
| 163383 | TruSeqV2    | 10:96818106 | missense  | T/T     | 4.44E-16 | 71  | 99 | 45 | 99 | 0/0 | 0/0 | 0/0 | match | match | match |
| 198564 | Agilent38MB | 10:96818106 | missense  | T/T     | 2.22E-16 | 295 | 99 | 38 | 99 | 0/0 | 0/0 | 0/0 | match | match | match |
| 108971 | TruSeqV2    | 10:96818119 | missense  | G/G     | 1.33E-15 | 89  | 99 | 43 | 99 | 0/0 | 0/0 | 0/0 | match | match | match |
| 115239 | TruSeqV2    | 10:96818119 | missense  | G/G     | 2.22E-16 | 57  | 99 | 44 | 99 | 0/0 | 0/0 | 0/0 | match | match | match |
| 132306 | Agilent38MB | 10:96818119 | missense  | G/G     | 2.22E-16 | 206 | 99 | 26 | 75 | 0/0 | 0/0 | 0/0 | match | match | match |
| 163383 | TruSeqV2    | 10:96818119 | missense  | G/G     | 2.22E-16 | 88  | 99 | 48 | 99 | 0/0 | 0/0 | 0/0 | match | match | match |
| 198564 | Agilent38MB | 10:96818119 | missense  | G/G     | 2.22E-16 | 337 | 99 | 35 | 99 | 0/0 | 0/0 | 0/0 | match | match | match |
| 108971 | TruSeqV2    | 10:96824643 | stop/miss | G/G     | 4.44E-16 | 44  | 99 | 38 | 99 | 0/0 | 0/0 | 0/0 | match | match | match |
| 115239 | TruSeqV2    | 10:96824643 | stop/miss | G/G     | 4.44E-16 | 19  | 54 | 42 | 99 | 0/0 | 0/0 | 0/0 | match | match | match |
| 132306 | Agilent38MB | 10:96824643 | stop/miss | G/G     | 8.88E-16 | 161 | 99 | 22 | 57 | 0/0 | 0/0 | 0/0 | match | match | match |
| 163383 | TruSeqV2    | 10:96824643 | stop/miss | G/G     | 4.44E-16 | 39  | 99 | 43 | 99 | 0/0 | 0/0 | 0/0 | match | match | match |
| 198564 | Agilent38MB | 10:96824643 | stop/miss | G/G     | 4.44E-16 | 297 | 99 | 23 | 54 | 0/0 | 0/0 | 0/0 | match | match | match |
| 108971 | TruSeqV2    | 10:96826971 | fs        | A/A     | 2.22E-16 | 78  | 99 | 37 | 99 | 0/0 | 0/0 | 0/0 | match | match | match |
| 115239 | TruSeqV2    | 10:96826971 | fs        | A/A     | 2.22E-16 | 78  | 99 | 37 | 99 | 0/0 | 0/0 | 0/0 | match | match | match |
| 132306 | Agilent38MB | 10:96826971 | fs        | A/A     | 2.22E-16 | 78  | 99 | 37 | 99 | 0/0 | 0/0 | 0/0 | match | match | match |
| 163383 | TruSeqV2    | 10:96826971 | fs        | A/A     | 2.22E-16 | 78  | 99 | 37 | 99 | 0/0 | 0/0 | 0/0 | match | match | match |

|        |             |              |          |     |          |     |    |    |    |     |     |     |       |       |       |
|--------|-------------|--------------|----------|-----|----------|-----|----|----|----|-----|-----|-----|-------|-------|-------|
| 198564 | Agilent38MB | 10:96826971  | fs       | A/A | 2.22E-16 | 78  | 99 | 37 | 99 | 0/0 | 0/0 | 0/0 | match | match | match |
| 108971 | TruSeqV2    | 10:96827030  | missense | T/C | 4.32E-08 | 139 | 99 | 37 | 99 | 0/1 | 0/1 | 0/1 | match | match | match |
| 115239 | TruSeqV2    | 10:96827030  | missense | C/C | 1.01E-12 | 118 | 99 | 32 | 90 | 0/0 | 0/0 | 0/0 | match | match | match |
| 132306 | Agilent38MB | 10:96827030  | missense | C/C | 4.83E-11 | 324 | 99 | 40 | 99 | 0/0 | 0/0 | 0/0 | match | match | match |
| 163383 | TruSeqV2    | 10:96827030  | missense | T/C | 5.60E-09 | 129 | 99 | 37 | 99 | 0/1 | 0/1 | 0/1 | match | match | match |
| 198564 | Agilent38MB | 10:96827030  | missense | C/C | 1.25E-12 | 575 | 99 | 42 | 99 | 0/0 | 0/0 | 0/0 | match | match | match |
| 108971 | TruSeqV2    | 10:96829245  | 5'UTR    | T/T | 4.73E-14 | 53  | 99 | 41 | 99 | 0/0 | 0/0 | 0/0 | match | match | match |
| 115239 | TruSeqV2    | 10:96829245  | 5'UTR    | T/T | 4.33E-14 | 32  | 81 | 51 | 99 | 0/0 | 0/0 | 0/0 | match | match | match |
| 132306 | Agilent38MB | 10:96829245  | 5'UTR    | T/T | 6.66E-16 | 9   | 21 | 46 | 99 | 0/0 | 0/0 | 0/0 | match | match | match |
| 163383 | TruSeqV2    | 10:96829245  | 5'UTR    | T/T | 1.55E-15 | 71  | 99 | 49 | 99 | 0/0 | 0/0 | 0/0 | match | match | match |
| 198564 | Agilent38MB | 10:96829245  | 5'UTR    | T/T | 8.88E-16 | 9   | 15 | 59 | 99 | 0/0 | 0/0 | 0/0 | match | match | match |
| 108971 | TruSeqV2    | 11:114167240 | 5'UTR    | A/A | 8.88E-16 | 223 | 99 | 45 | 99 | 0/0 | 0/0 | 0/0 | match | match | match |
| 115239 | TruSeqV2    | 11:114167240 | 5'UTR    | A/A | 4.22E-15 | 142 | 99 | 41 | 99 | 0/0 | 0/0 | 0/0 | match | match | match |
| 132306 | Agilent38MB | 11:114167240 | 5'UTR    | A/A | 4.00E-15 | 23  | 63 | 22 | 60 | 0/0 | 0/0 | 0/0 | match | match | match |
| 163383 | TruSeqV2    | 11:114167240 | 5'UTR    | A/A | 3.80E-14 | 170 | 99 | 39 | 99 | 0/0 | 0/0 | 0/0 | match | match | match |
| 198564 | Agilent38MB | 11:114167240 | 5'UTR    | A/A | 1.78E-15 | 49  | 99 | 52 | 99 | 0/0 | 0/0 | 0/0 | match | match | match |
| 108971 | TruSeqV2    | 11:114167344 | synon    | A/A | 2.89E-15 | 176 | 99 | 42 | 99 | 0/0 | 0/0 | 0/0 | match | match | match |
| 115239 | TruSeqV2    | 11:114167344 | synon    | A/A | 6.22E-15 | 110 | 99 | 38 | 99 | 0/0 | 0/0 | 0/0 | match | match | match |
| 132306 | Agilent38MB | 11:114167344 | synon    | A/A | 8.50E-14 | 79  | 99 | 37 | 96 | 0/0 | 0/0 | 0/0 | match | match | match |
| 163383 | TruSeqV2    | 11:114167344 | synon    | A/A | 4.66E-15 | 176 | 99 | 42 | 99 | 0/0 | 0/0 | 0/0 | match | match | match |
| 198564 | Agilent38MB | 11:114167344 | synon    | A/A | 6.66E-16 | 97  | 99 | 48 | 99 | 0/0 | 0/0 | 0/0 | match | match | match |
| 108971 | TruSeqV2    | 11:114167384 | missense | C/C | 4.82E-14 | 194 | 99 | 30 | 87 | 0/0 | 0/0 | 0/0 | match | match | match |
| 115239 | TruSeqV2    | 11:114167384 | missense | C/C | 4.57E-14 | 108 | 99 | 40 | 99 | 0/0 | 0/0 | 0/0 | match | match | match |
| 132306 | Agilent38MB | 11:114167384 | missense | C/C | 7.42E-14 | 109 | 99 | 28 | 72 | 0/0 | 0/0 | 0/0 | match | match | match |
| 163383 | TruSeqV2    | 11:114167384 | missense | C/C | 5.22E-12 | 188 | 99 | 41 | 99 | 0/0 | 0/0 | 0/0 | match | match | match |
| 198564 | Agilent38MB | 11:114167384 | missense | C/C | 6.38E-12 | 157 | 99 | 52 | 99 | 0/0 | 0/0 | 0/0 | match | match | match |
| 108971 | TruSeqV2    | 11:114182607 | intronic | C/C | 6.66E-16 | 3   | 9  | 48 | 99 | 0/0 | 0/0 | 0/0 | match | match | match |
| 115239 | TruSeqV2    | 11:114182607 | intronic | C/C | 2.22E-16 | 5   | 15 | 44 | 99 | 0/0 | 0/0 | 0/0 | match | match | match |
| 132306 | Agilent38MB | 11:114182607 | intronic | C/C | 4.44E-16 | 3   | 0  | 38 | 99 | 0/0 | 0/0 | 0/0 | match | match | match |
| 163383 | TruSeqV2    | 11:114182607 | intronic | C/C | 2.22E-16 | 11  | 33 | 34 | 90 | 0/0 | 0/0 | 0/0 | match | match | match |
| 198564 | Agilent38MB | 11:114182607 | intronic | C/C | 2.22E-15 | 6   | 18 | 42 | 99 | 0/0 | 0/0 | 0/0 | match | match | match |
| 108971 | TruSeqV2    | 11:114182871 | fs       | -/- | 2.34E-13 | 158 | 99 | 30 | 84 | 0/0 | 0/0 | 0/0 | match | match | match |
| 115239 | TruSeqV2    | 11:114182871 | fs       | -/- | 1.66E-13 | 158 | 99 | 30 | 84 | 0/0 | 0/0 | 0/0 | match | match | match |
| 132306 | Agilent38MB | 11:114182871 | fs       | -/- | 8.66E-15 | 158 | 99 | 30 | 84 | 0/0 | 0/0 | 0/0 | match | match | match |
| 163383 | TruSeqV2    | 11:114182871 | fs       | -/- | 1.89E-14 | 158 | 99 | 30 | 84 | 0/0 | 0/0 | 0/0 | match | match | match |
| 198564 | Agilent38MB | 11:114182871 | fs       | -/- | 8.99E-14 | 158 | 99 | 30 | 84 | 0/0 | 0/0 | 0/0 | match | match | match |
| 108971 | TruSeqV2    | 11:114183137 | missense | A/A | 2.22E-16 | 150 | 99 | 44 | 99 | 0/0 | 0/0 | 0/0 | match | match | match |
| 115239 | TruSeqV2    | 11:114183137 | missense | A/A | 6.66E-16 | 106 | 99 | 41 | 99 | 0/0 | 0/0 | 0/0 | match | match | match |

|        |             |              |          |     |          |     |    |    |    |     |     |     |       |       |       |
|--------|-------------|--------------|----------|-----|----------|-----|----|----|----|-----|-----|-----|-------|-------|-------|
| 132306 | Agilent38MB | 11:114183137 | missense | A/A | 8.88E-16 | 219 | 99 | 32 | 87 | 0/0 | 0/0 | 0/0 | match | match | match |
| 163383 | TruSeqV2    | 11:114183137 | missense | A/A | 4.44E-16 | 149 | 99 | 45 | 99 | 0/0 | 0/0 | 0/0 | match | match | match |
| 198564 | Agilent38MB | 11:114183137 | missense | A/A | 2.22E-16 | 401 | 99 | 50 | 99 | 0/0 | 0/0 | 0/0 | match | match | match |
| 108971 | TruSeqV2    | 11:17414570  | missense | C/C | 1.33E-15 | 148 | 99 | 30 | 84 | 0/0 | 0/0 | 0/0 | match | match | match |
| 115239 | TruSeqV2    | 11:17414570  | missense | C/C | 6.66E-16 | 81  | 99 | 22 | 60 | 0/0 | 0/0 | 0/0 | match | match | match |
| 132306 | Agilent38MB | 11:17414570  | missense | C/C | 6.66E-16 | 135 | 99 | 37 | 93 | 0/0 | 0/0 | 0/0 | match | match | match |
| 163383 | TruSeqV2    | 11:17414570  | missense | T/C | 8.06E-10 | 123 | 99 | 36 | 99 | 0/1 | 0/1 | 0/1 | match | match | match |
| 198564 | Agilent38MB | 11:17414570  | missense | C/C | 2.44E-15 | 256 | 99 | 30 | 69 | 0/0 | 0/0 | 0/0 | match | match | match |
| 108971 | TruSeqV2    | 11:17418477  | missense | C/A | 1.18E-14 | 131 | 99 | 37 | 99 | 0/1 | 0/1 | 0/1 | match | match | match |
| 115239 | TruSeqV2    | 11:17418477  | missense | C/C | 3.62E-14 | 95  | 99 | 20 | 24 | 0/0 | 0/0 | 0/0 | match | match | match |
| 132306 | Agilent38MB | 11:17418477  | missense | C/A | 3.33E-15 | 68  | 99 | 26 | 99 | 0/1 | 0/1 | 0/1 | match | match | match |
| 163383 | TruSeqV2    | 11:17418477  | missense | A/A | 8.19E-14 | 117 | 99 | 33 | 98 | 1/1 | 1/1 | 1/1 | match | match | match |
| 198564 | Agilent38MB | 11:17418477  | missense | A/A | 4.89E-12 | 137 | 99 | 38 | 99 | 1/1 | 1/1 | 1/1 | match | match | match |
| 108971 | TruSeqV2    | 11:17428556  | stop     | A/A | 6.66E-16 | 229 | 99 | 41 | 99 | 0/0 | 0/0 | 0/0 | match | match | match |
| 115239 | TruSeqV2    | 11:17428556  | stop     | A/A | 4.44E-16 | 161 | 99 | 24 | 69 | 0/0 | 0/0 | 0/0 | match | match | match |
| 132306 | Agilent38MB | 11:17428556  | stop     | A/A | 1.78E-15 | 128 | 99 | 32 | 84 | 0/0 | 0/0 | 0/0 | match | match | match |
| 163383 | TruSeqV2    | 11:17428556  | stop     | A/A | 1.11E-15 | 174 | 99 | 38 | 99 | 0/0 | 0/0 | 0/0 | match | match | match |
| 198564 | Agilent38MB | 11:17428556  | stop     | A/A | 4.44E-16 | 261 | 99 | 32 | 81 | 0/0 | 0/0 | 0/0 | match | match | match |
| 108971 | TruSeqV2    | 11:17434263  | stop     | G/G | 4.44E-16 | 259 | 99 | 39 | 99 | 0/0 | 0/0 | 0/0 | match | match | match |
| 115239 | TruSeqV2    | 11:17434263  | stop     | G/G | 4.44E-16 | 148 | 99 | 31 | 81 | 0/0 | 0/0 | 0/0 | match | match | match |
| 132306 | Agilent38MB | 11:17434263  | stop     | G/G | 8.88E-16 | 58  | 99 | 36 | 96 | 0/0 | 0/0 | 0/0 | match | match | match |
| 163383 | TruSeqV2    | 11:17434263  | stop     | G/G | 1.11E-15 | 217 | 99 | 31 | 87 | 0/0 | 0/0 | 0/0 | match | match | match |
| 198564 | Agilent38MB | 11:17434263  | stop     | G/G | 1.11E-15 | 102 | 99 | 35 | 99 | 0/0 | 0/0 | 0/0 | match | match | match |
| 108971 | TruSeqV2    | 11:17449428  | fs       | -/- | 2.22E-16 | 165 | 99 | 38 | 90 | 0/0 | 0/0 | 0/0 | match | match | match |
| 115239 | TruSeqV2    | 11:17449428  | fs       | -/- | 2.22E-16 | 165 | 99 | 38 | 90 | 0/0 | 0/0 | 0/0 | match | match | match |
| 132306 | Agilent38MB | 11:17449428  | fs       | -/- | 1.11E-15 | 165 | 99 | 38 | 90 | 0/0 | 0/0 | 0/0 | match | match | match |
| 163383 | TruSeqV2    | 11:17449428  | fs       | -/- | 4.44E-16 | 165 | 99 | 38 | 90 | 0/0 | 0/0 | 0/0 | match | match | match |
| 198564 | Agilent38MB | 11:17449428  | fs       | -/- | 2.22E-16 | 165 | 99 | 38 | 90 | 0/0 | 0/0 | 0/0 | match | match | match |
| 108971 | TruSeqV2    | 11:17450144  | fs       | C/C | 4.44E-16 | 144 | 99 | 38 | 99 | 0/0 | 0/0 | 0/0 | match | match | match |
| 115239 | TruSeqV2    | 11:17450144  | fs       | C/C | 3.11E-15 | 144 | 99 | 38 | 99 | 0/0 | 0/0 | 0/0 | match | match | match |
| 132306 | Agilent38MB | 11:17450144  | fs       | C/C | 9.77E-15 | 144 | 99 | 38 | 99 | 0/0 | 0/0 | 0/0 | match | match | match |
| 163383 | TruSeqV2    | 11:17450144  | fs       | C/C | 3.77E-15 | 144 | 99 | 38 | 99 | 0/0 | 0/0 | 0/0 | match | match | match |
| 198564 | Agilent38MB | 11:17450144  | fs       | C/C | 4.22E-15 | 144 | 99 | 38 | 99 | 0/0 | 0/0 | 0/0 | match | match | match |
| 108971 | TruSeqV2    | 11:17483210  | stop     | G/G | 2.22E-16 | 93  | 99 | 45 | 99 | 0/0 | 0/0 | 0/0 | match | match | match |
| 115239 | TruSeqV2    | 11:17483210  | stop     | G/G | 2.22E-16 | 54  | 99 | 23 | 48 | 0/0 | 0/0 | 0/0 | match | match | match |
| 132306 | Agilent38MB | 11:17483210  | stop     | G/G | 2.22E-16 | 237 | 99 | 35 | 87 | 0/0 | 0/0 | 0/0 | match | match | match |
| 163383 | TruSeqV2    | 11:17483210  | stop     | G/G | 4.44E-16 | 57  | 99 | 35 | 90 | 0/0 | 0/0 | 0/0 | match | match | match |
| 198564 | Agilent38MB | 11:17483210  | stop     | G/G | 1.55E-15 | 394 | 99 | 40 | 96 | 0/0 | 0/0 | 0/0 | match | match | match |



|        |             |             |          |     |          |     |    |    |    |     |     |     |       |       |       |
|--------|-------------|-------------|----------|-----|----------|-----|----|----|----|-----|-----|-----|-------|-------|-------|
| 132306 | Agilent38MB | 11:45679197 | intronic | G/G | 3.33E-15 | 2   | 6  | 36 | 99 | 1/1 | 1/1 | 1/1 | match | match | match |
| 198564 | Agilent38MB | 11:45691619 | promoter | C/C | 1.07E-14 | 3   | 0  | 46 | 99 | 0/0 | 0/0 | 0/0 | match | match | match |
| 198564 | Agilent38MB | 11:45696153 | promoter | G/G | 1.55E-14 | 1   | 3  | 18 | 39 | 0/0 | 0/0 | 0/0 | match | match | match |
| 115239 | TruSeqV2    | 11:45696973 | promoter | A/A | 2.22E-16 | 1   | 3  | 26 | 63 | 0/0 | 0/0 | 0/0 | match | match | match |
| 108971 | TruSeqV2    | 11:62746960 | missense | C/C | 8.88E-16 | 178 | 99 | 33 | 93 | 0/0 | 0/0 | 0/0 | match | match | match |
| 115239 | TruSeqV2    | 11:62746960 | missense | C/C | 4.44E-16 | 107 | 99 | 33 | 90 | 0/0 | 0/0 | 0/0 | match | match | match |
| 132306 | Agilent38MB | 11:62746960 | missense | C/C | 4.44E-16 | 60  | 99 | 34 | 99 | 0/0 | 0/0 | 0/0 | match | match | match |
| 163383 | TruSeqV2    | 11:62746960 | missense | C/C | 4.44E-16 | 128 | 99 | 34 | 90 | 0/0 | 0/0 | 0/0 | match | match | match |
| 198564 | Agilent38MB | 11:62746960 | missense | C/C | 2.22E-16 | 93  | 99 | 46 | 99 | 0/0 | 0/0 | 0/0 | match | match | match |
| 108971 | TruSeqV2    | 11:62748776 | missense | G/G | 4.44E-16 | 89  | 99 | 30 | 81 | 0/0 | 0/0 | 0/0 | match | match | match |
| 115239 | TruSeqV2    | 11:62748776 | missense | G/G | 4.44E-16 | 46  | 99 | 11 | 30 | 0/0 | 0/0 | 0/0 | match | match | match |
| 132306 | Agilent38MB | 11:62748776 | missense | G/G | 6.66E-16 | 19  | 51 | 29 | 84 | 0/0 | 0/0 | 0/0 | match | match | match |
| 163383 | TruSeqV2    | 11:62748776 | missense | G/G | 4.44E-16 | 58  | 99 | 24 | 66 | 0/0 | 0/0 | 0/0 | match | match | match |
| 198564 | Agilent38MB | 11:62748776 | missense | G/G | 2.22E-16 | 44  | 99 | 45 | 99 | 0/0 | 0/0 | 0/0 | match | match | match |
| 108971 | TruSeqV2    | 11:62749344 | missense | G/G | 4.00E-15 | 185 | 99 | 44 | 99 | 0/0 | 0/0 | 0/0 | match | match | match |
| 115239 | TruSeqV2    | 11:62749344 | missense | G/G | 4.44E-16 | 112 | 99 | 34 | 93 | 0/0 | 0/0 | 0/0 | match | match | match |
| 132306 | Agilent38MB | 11:62749344 | missense | G/G | 4.44E-16 | 21  | 54 | 38 | 96 | 0/0 | 0/0 | 0/0 | match | match | match |
| 163383 | TruSeqV2    | 11:62749344 | missense | G/G | 1.33E-15 | 160 | 99 | 41 | 99 | 0/0 | 0/0 | 0/0 | match | match | match |
| 198564 | Agilent38MB | 11:62749344 | missense | G/G | 1.55E-15 | 50  | 99 | 39 | 93 | 0/0 | 0/0 | 0/0 | match | match | match |
| 108971 | TruSeqV2    | 11:62749434 | missense | A/A | 6.66E-16 | 173 | 99 | 43 | 99 | 0/0 | 0/0 | 0/0 | match | match | match |
| 115239 | TruSeqV2    | 11:62749434 | missense | A/A | 6.66E-16 | 107 | 99 | 16 | 45 | 0/0 | 0/0 | 0/0 | match | match | match |
| 132306 | Agilent38MB | 11:62749434 | missense | A/A | 4.44E-16 | 17  | 45 | 32 | 90 | 0/0 | 0/0 | 0/0 | match | match | match |
| 163383 | TruSeqV2    | 11:62749434 | missense | A/A | 4.88E-15 | 127 | 99 | 33 | 84 | 0/0 | 0/0 | 0/0 | match | match | match |
| 198564 | Agilent38MB | 11:62749434 | missense | A/A | 6.66E-16 | 24  | 66 | 30 | 87 | 0/0 | 0/0 | 0/0 | match | match | match |
| 108971 | TruSeqV2    | 11:62751994 | fs       | C/C | 4.44E-16 | 48  | 99 | 30 | 78 | 0/0 | 0/0 | 0/0 | match | match | match |
| 115239 | TruSeqV2    | 11:62751994 | fs       | C/C | 0        | 48  | 99 | 30 | 78 | 0/0 | 0/0 | 0/0 | match | match | match |
| 132306 | Agilent38MB | 11:62751994 | fs       | C/C | 4.44E-16 | 48  | 99 | 30 | 78 | 0/0 | 0/0 | 0/0 | match | match | match |
| 163383 | TruSeqV2    | 11:62751994 | fs       | C/C | 1.78E-15 | 48  | 99 | 30 | 78 | 0/0 | 0/0 | 0/0 | match | match | match |
| 198564 | Agilent38MB | 11:62751994 | fs       | C/C | 4.44E-16 | 48  | 99 | 30 | 78 | 0/0 | 0/0 | 0/0 | match | match | match |
| 108971 | TruSeqV2    | 11:62752014 | missense | C/C | 2.25E-08 | 37  | 90 | 27 | 66 | 0/0 | 0/0 | 0/0 | match | match | match |
| 115239 | TruSeqV2    | 11:62752014 | missense | C/C | 3.62E-08 | 22  | 63 | 12 | 33 | 0/0 | 0/0 | 0/0 | match | match | match |
| 163383 | TruSeqV2    | 11:62752014 | missense | C/C | 2.65E-11 | 22  | 51 | 34 | 96 | 0/0 | 0/0 | 0/0 | match | match | match |
| 108971 | TruSeqV2    | 11:62752123 | missense | C/C | 2.22E-16 | 38  | 99 | 43 | 99 | 0/0 | 0/0 | 0/0 | match | match | match |
| 115239 | TruSeqV2    | 11:62752123 | missense | C/C | 6.66E-16 | 27  | 75 | 16 | 36 | 0/0 | 0/0 | 0/0 | match | match | match |
| 132306 | Agilent38MB | 11:62752123 | missense | C/C | 4.44E-16 | 46  | 99 | 55 | 99 | 0/0 | 0/0 | 0/0 | match | match | match |
| 163383 | TruSeqV2    | 11:62752123 | missense | C/C | 2.22E-16 | 33  | 90 | 39 | 93 | 0/0 | 0/0 | 0/0 | match | match | match |
| 198564 | Agilent38MB | 11:62752123 | missense | C/C | 4.44E-16 | 68  | 99 | 43 | 99 | 0/0 | 0/0 | 0/0 | match | match | match |
| 108971 | TruSeqV2    | 11:62761083 | missense | C/C | 2.20E-14 | 117 | 99 | 39 | 99 | 0/0 | 0/0 | 0/0 | match | match | match |

|        |             |             |          |     |          |     |    |    |    |     |     |     |       |       |       |
|--------|-------------|-------------|----------|-----|----------|-----|----|----|----|-----|-----|-----|-------|-------|-------|
| 115239 | TruSeqV2    | 11:62761083 | missense | C/C | 7.33E-15 | 85  | 99 | 32 | 90 | 0/0 | 0/0 | 0/0 | match | match | match |
| 132306 | Agilent38MB | 11:62761083 | missense | C/C | 2.89E-15 | 31  | 57 | 44 | 99 | 0/0 | 0/0 | 0/0 | match | match | match |
| 163383 | TruSeqV2    | 11:62761083 | missense | C/C | 2.44E-15 | 84  | 99 | 43 | 99 | 0/0 | 0/0 | 0/0 | match | match | match |
| 198564 | Agilent38MB | 11:62761083 | missense | C/C | 3.29E-14 | 29  | 69 | 34 | 99 | 0/0 | 0/0 | 0/0 | match | match | match |
| 108971 | TruSeqV2    | 11:62762035 | missense | C/C | 6.62E-13 | 96  | 99 | 32 | 90 | 0/0 | 0/0 | 0/0 | match | match | match |
| 115239 | TruSeqV2    | 11:62762035 | missense | C/C | 5.62E-13 | 87  | 99 | 27 | 69 | 0/0 | 0/0 | 0/0 | match | match | match |
| 132306 | Agilent38MB | 11:62762035 | missense | C/C | 6.66E-16 | 33  | 87 | 34 | 93 | 0/0 | 0/0 | 0/0 | match | match | match |
| 163383 | TruSeqV2    | 11:62762035 | missense | C/C | 8.88E-16 | 90  | 99 | 30 | 78 | 0/0 | 0/0 | 0/0 | match | match | match |
| 198564 | Agilent38MB | 11:62762035 | missense | C/C | 1.69E-12 | 35  | 99 | 31 | 90 | 0/0 | 0/0 | 0/0 | match | match | match |
| 108971 | TruSeqV2    | 11:62763248 | missense | G/G | 6.66E-16 | 232 | 99 | 42 | 99 | 0/0 | 0/0 | 0/0 | match | match | match |
| 115239 | TruSeqV2    | 11:62763248 | missense | G/G | 6.66E-16 | 143 | 99 | 22 | 57 | 0/0 | 0/0 | 0/0 | match | match | match |
| 132306 | Agilent38MB | 11:62763248 | missense | G/G | 8.88E-16 | 309 | 99 | 28 | 75 | 0/0 | 0/0 | 0/0 | match | match | match |
| 163383 | TruSeqV2    | 11:62763248 | missense | G/G | 8.88E-16 | 181 | 99 | 29 | 75 | 0/0 | 0/0 | 0/0 | match | match | match |
| 198564 | Agilent38MB | 11:62763248 | missense | G/G | 8.88E-16 | 469 | 99 | 35 | 96 | 0/0 | 0/0 | 0/0 | match | match | match |
| 108971 | TruSeqV2    | 11:62763264 | missense | T/T | 8.88E-16 | 217 | 99 | 40 | 99 | 0/0 | 0/0 | 0/0 | match | match | match |
| 115239 | TruSeqV2    | 11:62763264 | missense | T/T | 1.73E-13 | 129 | 99 | 18 | 48 | 0/0 | 0/0 | 0/0 | match | match | match |
| 132306 | Agilent38MB | 11:62763264 | missense | T/T | 3.57E-14 | 253 | 99 | 28 | 81 | 0/0 | 0/0 | 0/0 | match | match | match |
| 163383 | TruSeqV2    | 11:62763264 | missense | T/T | 4.44E-16 | 175 | 99 | 26 | 60 | 0/0 | 0/0 | 0/0 | match | match | match |
| 198564 | Agilent38MB | 11:62763264 | missense | T/T | 9.73E-14 | 409 | 99 | 37 | 77 | 0/0 | 0/0 | 0/0 | match | match | match |
| 108971 | TruSeqV2    | 11:62763544 | missense | A/A | 4.44E-16 | 116 | 99 | 44 | 99 | 0/0 | 0/0 | 0/0 | match | match | match |
| 115239 | TruSeqV2    | 11:62763544 | missense | A/A | 4.44E-16 | 78  | 99 | 22 | 48 | 0/0 | 0/0 | 0/0 | match | match | match |
| 132306 | Agilent38MB | 11:62763544 | missense | A/A | 4.44E-16 | 150 | 99 | 35 | 93 | 0/0 | 0/0 | 0/0 | match | match | match |
| 163383 | TruSeqV2    | 11:62763544 | missense | A/A | 4.44E-16 | 91  | 99 | 42 | 99 | 0/0 | 0/0 | 0/0 | match | match | match |
| 198564 | Agilent38MB | 11:62763544 | missense | A/A | 4.44E-16 | 262 | 99 | 30 | 78 | 0/0 | 0/0 | 0/0 | match | match | match |
| 108971 | TruSeqV2    | 11:62763557 | missense | G/G | 3.75E-14 | 125 | 99 | 42 | 99 | 0/0 | 0/0 | 0/0 | match | match | match |
| 115239 | TruSeqV2    | 11:62763557 | missense | G/G | 7.33E-15 | 82  | 99 | 25 | 63 | 0/0 | 0/0 | 0/0 | match | match | match |
| 132306 | Agilent38MB | 11:62763557 | missense | G/G | 1.04E-14 | 141 | 99 | 37 | 99 | 0/0 | 0/0 | 0/0 | match | match | match |
| 163383 | TruSeqV2    | 11:62763557 | missense | G/G | 4.44E-15 | 99  | 99 | 36 | 99 | 0/0 | 0/0 | 0/0 | match | match | match |
| 198564 | Agilent38MB | 11:62763557 | missense | G/G | 1.11E-15 | 251 | 99 | 33 | 93 | 0/0 | 0/0 | 0/0 | match | match | match |
| 108971 | TruSeqV2    | 11:62763607 | missense | A/A | 1.91E-11 | 93  | 99 | 35 | 93 | 0/0 | 0/0 | 0/0 | match | match | match |
| 115239 | TruSeqV2    | 11:62763607 | missense | A/A | 2.39E-09 | 68  | 99 | 20 | 57 | 0/0 | 0/0 | 0/0 | match | match | match |
| 132306 | Agilent38MB | 11:62763607 | missense | A/A | 6.63E-10 | 117 | 99 | 40 | 96 | 0/0 | 0/0 | 0/0 | match | match | match |
| 163383 | TruSeqV2    | 11:62763607 | missense | A/A | 7.45E-09 | 78  | 99 | 32 | 84 | 0/0 | 0/0 | 0/0 | match | match | match |
| 198564 | Agilent38MB | 11:62763607 | missense | A/A | 5.21E-09 | 196 | 99 | 31 | 75 | 0/0 | 0/0 | 0/0 | match | match | match |
| 108971 | TruSeqV2    | 11:62766431 | missense | A/A | 1.33E-15 | 267 | 99 | 48 | 99 | 0/0 | 0/0 | 0/0 | match | match | match |
| 115239 | TruSeqV2    | 11:62766431 | missense | A/A | 1.11E-15 | 201 | 99 | 23 | 60 | 0/0 | 0/0 | 0/0 | match | match | match |
| 132306 | Agilent38MB | 11:62766431 | missense | A/A | 8.88E-16 | 83  | 99 | 36 | 99 | 0/0 | 0/0 | 0/0 | match | match | match |
| 163383 | TruSeqV2    | 11:62766431 | missense | A/A | 6.66E-16 | 230 | 99 | 36 | 99 | 0/0 | 0/0 | 0/0 | match | match | match |

|        |             |             |          |     |          |     |    |    |    |     |     |     |       |       |       |
|--------|-------------|-------------|----------|-----|----------|-----|----|----|----|-----|-----|-----|-------|-------|-------|
| 198564 | Agilent38MB | 11:62766431 | missense | A/A | 6.66E-16 | 117 | 99 | 44 | 99 | 0/0 | 0/0 | 0/0 | match | match | match |
| 108971 | TruSeqV2    | 11:62766439 | stop     | G/G | 3.81E-12 | 280 | 99 | 46 | 99 | 0/0 | 0/0 | 0/0 | match | match | match |
| 115239 | TruSeqV2    | 11:62766439 | stop     | G/G | 4.59E-13 | 211 | 99 | 22 | 51 | 0/0 | 0/0 | 0/0 | match | match | match |
| 132306 | Agilent38MB | 11:62766439 | stop     | G/G | 1.70E-12 | 80  | 99 | 37 | 96 | 0/0 | 0/0 | 0/0 | match | match | match |
| 163383 | TruSeqV2    | 11:62766439 | stop     | G/G | 2.46E-11 | 234 | 99 | 43 | 99 | 0/0 | 0/0 | 0/0 | match | match | match |
| 198564 | Agilent38MB | 11:62766439 | stop     | G/G | 1.04E-14 | 115 | 99 | 44 | 99 | 0/0 | 0/0 | 0/0 | match | match | match |
| 108971 | TruSeqV2    | 11:62767307 | missense | G/G | 2.22E-16 | 77  | 99 | 21 | 63 | 0/0 | 0/0 | 0/0 | match | match | match |
| 115239 | TruSeqV2    | 11:62767307 | missense | G/G | 8.88E-16 | 53  | 99 | 18 | 54 | 0/0 | 0/0 | 0/0 | match | match | match |
| 132306 | Agilent38MB | 11:62767307 | missense | G/G | 4.44E-16 | 19  | 39 | 34 | 78 | 0/0 | 0/0 | 0/0 | match | match | match |
| 163383 | TruSeqV2    | 11:62767307 | missense | G/G | 4.44E-16 | 57  | 99 | 34 | 81 | 0/0 | 0/0 | 0/0 | match | match | match |
| 198564 | Agilent38MB | 11:62767307 | missense | G/G | 1.11E-15 | 31  | 78 | 28 | 75 | 0/0 | 0/0 | 0/0 | match | match | match |
| 108971 | TruSeqV2    | 11:62768242 | missense | G/G | 2.00E-15 | 171 | 99 | 29 | 81 | 0/0 | 0/0 | 0/0 | match | match | match |
| 115239 | TruSeqV2    | 11:62768242 | missense | G/G | 2.44E-15 | 142 | 99 | 21 | 63 | 0/0 | 0/0 | 0/0 | match | match | match |
| 132306 | Agilent38MB | 11:62768242 | missense | G/G | 1.33E-15 | 166 | 99 | 22 | 57 | 0/0 | 0/0 | 0/0 | match | match | match |
| 163383 | TruSeqV2    | 11:62768242 | missense | G/G | 1.55E-15 | 151 | 99 | 42 | 99 | 0/0 | 0/0 | 0/0 | match | match | match |
| 198564 | Agilent38MB | 11:62768242 | missense | G/G | 8.88E-16 | 358 | 99 | 29 | 66 | 0/0 | 0/0 | 0/0 | match | match | match |
| 108971 | TruSeqV2    | 11:64323557 | missense | T/T | 1.03E-11 | 206 | 99 | 51 | 99 | 0/0 | 0/0 | 0/0 | match | match | match |
| 115239 | TruSeqV2    | 11:64323557 | missense | T/T | 1.75E-07 | 129 | 99 | 20 | 54 | 0/0 | 0/0 | 0/0 | match | match | match |
| 132306 | Agilent38MB | 11:64323557 | missense | T/T | 5.62E-09 | 113 | 99 | 36 | 93 | 0/0 | 0/0 | 0/0 | match | match | match |
| 163383 | TruSeqV2    | 11:64323557 | missense | T/T | 9.40E-08 | 161 | 99 | 23 | 63 | 0/0 | 0/0 | 0/0 | match | match | match |
| 198564 | Agilent38MB | 11:64323557 | missense | T/T | 2.20E-07 | 189 | 99 | 34 | 81 | 0/0 | 0/0 | 0/0 | match | match | match |
| 108971 | TruSeqV2    | 11:64323562 | missense | A/A | 4.42E-10 | 210 | 99 | 49 | 99 | 0/0 | 0/0 | 0/0 | match | match | match |
| 115239 | TruSeqV2    | 11:64323562 | missense | A/A | 1.97E-09 | 122 | 99 | 20 | 51 | 0/0 | 0/0 | 0/0 | match | match | match |
| 132306 | Agilent38MB | 11:64323562 | missense | A/A | 4.77E-10 | 120 | 99 | 36 | 90 | 0/0 | 0/0 | 0/0 | match | match | match |
| 163383 | TruSeqV2    | 11:64323562 | missense | A/A | 4.49E-10 | 169 | 99 | 22 | 63 | 0/0 | 0/0 | 0/0 | match | match | match |
| 198564 | Agilent38MB | 11:64323562 | missense | A/A | 1.23E-09 | 211 | 99 | 35 | 87 | 0/0 | 0/0 | 0/0 | match | match | match |
| 108971 | TruSeqV2    | 11:64326677 | missense | T/T | 5.43E-13 | 164 | 99 | 38 | 99 | 0/0 | 0/0 | 0/0 | match | match | match |
| 115239 | TruSeqV2    | 11:64326677 | missense | T/T | 6.55E-11 | 117 | 99 | 18 | 31 | 0/0 | 0/0 | 0/0 | match | match | match |
| 132306 | Agilent38MB | 11:64326677 | missense | T/T | 2.47E-12 | 31  | 78 | 27 | 75 | 0/0 | 0/0 | 0/0 | match | match | match |
| 163383 | TruSeqV2    | 11:64326677 | missense | T/T | 5.82E-11 | 99  | 99 | 30 | 75 | 0/0 | 0/0 | 0/0 | match | match | match |
| 198564 | Agilent38MB | 11:64326677 | missense | T/T | 4.74E-11 | 115 | 99 | 47 | 99 | 0/0 | 0/0 | 0/0 | match | match | match |
| 108971 | TruSeqV2    | 11:64329590 | synon    | T/T | 6.66E-16 | 142 | 99 | 44 | 99 | 0/0 | 0/0 | 0/0 | match | match | match |
| 115239 | TruSeqV2    | 11:64329590 | synon    | T/T | 2.89E-15 | 92  | 99 | 8  | 24 | 0/0 | 0/0 | 0/0 | match | match | match |
| 132306 | Agilent38MB | 11:64329590 | synon    | T/T | 6.66E-16 | 71  | 99 | 34 | 93 | 0/0 | 0/0 | 0/0 | match | match | match |
| 163383 | TruSeqV2    | 11:64329590 | synon    | T/T | 6.66E-16 | 106 | 99 | 40 | 95 | 0/0 | 0/0 | 0/0 | match | match | match |
| 198564 | Agilent38MB | 11:64329590 | synon    | T/T | 6.66E-16 | 149 | 99 | 33 | 90 | 0/0 | 0/0 | 0/0 | match | match | match |
| 132306 | Agilent38MB | 11:64333296 | intronic | A/G | 2.89E-15 | 4   | 37 | 33 | 99 | 0/1 | 0/1 | 0/1 | match | match | match |
| 108971 | TruSeqV2    | 11:64359079 | missense | G/G | 6.66E-16 | 174 | 99 | 46 | 99 | 0/0 | 0/0 | 0/0 | match | match | match |

|        |             |             |          |               |          |     |    |    |    |     |     |     |       |       |       |
|--------|-------------|-------------|----------|---------------|----------|-----|----|----|----|-----|-----|-----|-------|-------|-------|
| 115239 | TruSeqV2    | 11:64359079 | missense | G/G           | 1.40E-14 | 113 | 99 | 28 | 69 | 0/0 | 0/0 | 0/0 | match | match | match |
| 132306 | Agilent38MB | 11:64359079 | missense | G/G           | 6.66E-16 | 210 | 99 | 42 | 99 | 0/0 | 0/0 | 0/0 | match | match | match |
| 163383 | TruSeqV2    | 11:64359079 | missense | G/G           | 6.66E-16 | 141 | 99 | 45 | 99 | 0/0 | 0/0 | 0/0 | match | match | match |
| 198564 | Agilent38MB | 11:64359079 | missense | G/G           | 5.33E-15 | 426 | 99 | 49 | 99 | 0/0 | 0/0 | 0/0 | match | match | match |
| 108971 | TruSeqV2    | 11:64360274 | synon    | C/C           | 1.38E-14 | 199 | 99 | 35 | 99 | 1/1 | 1/1 | 1/1 | match | match | match |
| 115239 | TruSeqV2    | 11:64360274 | synon    | C/T           | 3.55E-15 | 132 | 99 | 18 | 99 | 0/1 | 0/1 | 0/1 | match | match | match |
| 132306 | Agilent38MB | 11:64360274 | synon    | C/T           | 3.51E-14 | 75  | 99 | 41 | 99 | 0/1 | 0/1 | 0/1 | match | match | match |
| 163383 | TruSeqV2    | 11:64360274 | synon    | C/C           | 9.33E-15 | 135 | 99 | 36 | 99 | 1/1 | 1/1 | 1/1 | match | match | match |
| 198564 | Agilent38MB | 11:64360274 | synon    | C/C           | 1.59E-13 | 147 | 99 | 45 | 99 | 1/1 | 1/1 | 1/1 | match | match | match |
| 108971 | TruSeqV2    | 11:66131722 | synon    | C/C           | 1.11E-15 | 69  | 99 | 28 | 81 | 0/0 | 0/0 | 0/0 | match | match | match |
| 115239 | TruSeqV2    | 11:66131722 | synon    | C/C           | 2.29E-13 | 45  | 99 | 12 | 33 | 0/0 | 0/0 | 0/0 | match | match | match |
| 132306 | Agilent38MB | 11:66131722 | synon    | C/C           | 1.22E-14 | 16  | 45 | 23 | 66 | 0/0 | 0/0 | 0/0 | match | match | match |
| 163383 | TruSeqV2    | 11:66131722 | synon    | C/C           | 6.66E-15 | 50  | 99 | 29 | 81 | 0/0 | 0/0 | 0/0 | match | match | match |
| 198564 | Agilent38MB | 11:66131722 | synon    | C/C           | 2.89E-15 | 52  | 99 | 27 | 63 | 0/0 | 0/0 | 0/0 | match | match | match |
| 108971 | TruSeqV2    | 11:66133643 | synon    | G/G           | 4.44E-16 | 249 | 99 | 31 | 72 | 0/0 | 0/0 | 0/0 | match | match | match |
| 115239 | TruSeqV2    | 11:66133643 | synon    | G/G           | 8.22E-15 | 204 | 99 | 15 | 1  | 0/0 | 0/0 | 0/0 | match | match | match |
| 132306 | Agilent38MB | 11:66133643 | synon    | G/G           | 6.04E-14 | 71  | 99 | 33 | 81 | 0/0 | 0/0 | 0/0 | match | match | match |
| 163383 | TruSeqV2    | 11:66133643 | synon    | G/G           | 1.20E-14 | 248 | 99 | 25 | 60 | 0/0 | 0/0 | 0/0 | match | match | match |
| 198564 | Agilent38MB | 11:66133643 | synon    | G/G           | 1.78E-15 | 192 | 99 | 31 | 64 | 0/0 | 0/0 | 0/0 | match | match | match |
| 108971 | TruSeqV2    | 11:66135335 | missense | GTGGCG/GTGGCC | 8.88E-16 | 138 | 99 | 32 | 84 | 0/0 | 0/0 | 0/0 | match | match | match |
| 115239 | TruSeqV2    | 11:66135335 | missense | GTGGCG/GTGGCC | 8.88E-16 | 138 | 99 | 32 | 84 | 0/0 | 0/0 | 0/0 | match | match | match |
| 132306 | Agilent38MB | 11:66135335 | missense | GTGGCG/GTGGCC | 2.89E-15 | 138 | 99 | 32 | 84 | 0/0 | 0/0 | 0/0 | match | match | match |
| 163383 | TruSeqV2    | 11:66135335 | missense | GTGGCG/GTGGCC | 1.33E-15 | 138 | 99 | 32 | 84 | 0/0 | 0/0 | 0/0 | match | match | match |
| 198564 | Agilent38MB | 11:66135335 | missense | GTGGCG/GTGGCC | 6.44E-15 | 138 | 99 | 32 | 84 | 0/0 | 0/0 | 0/0 | match | match | match |
| 108971 | TruSeqV2    | 11:66136658 | synon    | C/C           | 8.88E-16 | 136 | 99 | 33 | 93 | 0/0 | 0/0 | 0/0 | match | match | match |
| 115239 | TruSeqV2    | 11:66136658 | synon    | C/C           | 6.66E-16 | 102 | 99 | 16 | 33 | 0/0 | 0/0 | 0/0 | match | match | match |
| 132306 | Agilent38MB | 11:66136658 | synon    | C/C           | 6.66E-16 | 6   | 6  | 16 | 48 | 0/0 | 0/0 | 0/0 | match | match | match |
| 163383 | TruSeqV2    | 11:66136658 | synon    | C/C           | 6.66E-16 | 100 | 99 | 24 | 57 | 0/0 | 0/0 | 0/0 | match | match | match |
| 198564 | Agilent38MB | 11:66136658 | synon    | C/C           | 2.00E-15 | 8   | 24 | 21 | 51 | 0/0 | 0/0 | 0/0 | match | match | match |
| 108971 | TruSeqV2    | 11:66136911 | missense | G/G           | 1.33E-15 | 140 | 99 | 24 | 60 | 0/0 | 0/0 | 0/0 | match | match | match |
| 115239 | TruSeqV2    | 11:66136911 | missense | G/G           | 3.33E-15 | 89  | 99 | 13 | 39 | 0/0 | 0/0 | 0/0 | match | match | match |
| 132306 | Agilent38MB | 11:66136911 | missense | G/G           | 1.78E-15 | 39  | 96 | 18 | 42 | 0/0 | 0/0 | 0/0 | match | match | match |
| 163383 | TruSeqV2    | 11:66136911 | missense | G/G           | 2.89E-15 | 103 | 99 | 24 | 57 | 0/0 | 0/0 | 0/0 | match | match | match |
| 198564 | Agilent38MB | 11:66136911 | missense | G/G           | 1.55E-15 | 63  | 99 | 22 | 66 | 0/0 | 0/0 | 0/0 | match | match | match |
| 108971 | TruSeqV2    | 11:66136938 | synon    | C/C           | 3.55E-15 | 115 | 99 | 28 | 84 | 0/0 | 0/0 | 0/0 | match | match | match |
| 115239 | TruSeqV2    | 11:66136938 | synon    | C/C           | 1.42E-14 | 85  | 99 | 15 | 33 | 0/0 | 0/0 | 0/0 | match | match | match |
| 132306 | Agilent38MB | 11:66136938 | synon    | C/C           | 2.44E-15 | 45  | 99 | 19 | 48 | 0/0 | 0/0 | 0/0 | match | match | match |
| 163383 | TruSeqV2    | 11:66136938 | synon    | C/C           | 5.55E-15 | 85  | 99 | 22 | 57 | 0/0 | 0/0 | 0/0 | match | match | match |

|        |             |             |          |     |          |     |    |    |    |     |     |     |       |       |       |
|--------|-------------|-------------|----------|-----|----------|-----|----|----|----|-----|-----|-----|-------|-------|-------|
| 198564 | Agilent38MB | 11:66136938 | synon    | C/C | 3.55E-15 | 80  | 99 | 27 | 69 | 0/0 | 0/0 | 0/0 | match | match | match |
| 108971 | TruSeqV2    | 11:67351297 | 5'UTR    | G/G | 5.28E-08 | 2   | 6  | 4  | 12 | 0/0 | 0/0 | 0/0 | match | match | match |
| 132306 | Agilent38MB | 11:67351297 | 5'UTR    | G/G | 4.88E-15 | 19  | 43 | 2  | 6  | 0/0 | 0/0 | 0/0 | match | match | match |
| 198564 | Agilent38MB | 11:67351297 | 5'UTR    | G/G | 5.33E-09 | 31  | 75 | 7  | 18 | 0/0 | 0/0 | 0/0 | match | match | match |
| 108971 | TruSeqV2    | 11:67351624 | synon    | C/C | 2.44E-15 | 56  | 99 | 37 | 84 | 0/0 | 0/0 | 0/0 | match | match | match |
| 115239 | TruSeqV2    | 11:67351624 | synon    | C/C | 1.84E-14 | 36  | 90 | 13 | 30 | 0/0 | 0/0 | 0/0 | match | match | match |
| 132306 | Agilent38MB | 11:67351624 | synon    | C/C | 2.22E-15 | 31  | 87 | 24 | 63 | 0/0 | 0/0 | 0/0 | match | match | match |
| 163383 | TruSeqV2    | 11:67351624 | synon    | C/C | 5.77E-15 | 34  | 90 | 12 | 33 | 0/0 | 0/0 | 0/0 | match | match | match |
| 198564 | Agilent38MB | 11:67351624 | synon    | C/C | 1.11E-14 | 59  | 99 | 25 | 75 | 0/0 | 0/0 | 0/0 | match | match | match |
| 108971 | TruSeqV2    | 11:67352689 | missense | A/G | 1.55E-15 | 140 | 99 | 39 | 99 | 0/1 | 0/1 | 0/1 | match | match | match |
| 115239 | TruSeqV2    | 11:67352689 | missense | G/G | 6.88E-15 | 66  | 99 | 19 | 57 | 1/1 | 1/1 | 1/1 | match | match | match |
| 132306 | Agilent38MB | 11:67352689 | missense | A/A | 3.33E-15 | 120 | 99 | 43 | 96 | 0/0 | 0/0 | 0/0 | match | match | match |
| 163383 | TruSeqV2    | 11:67352689 | missense | A/G | 2.00E-15 | 91  | 99 | 29 | 99 | 0/1 | 0/1 | 0/1 | match | match | match |
| 198564 | Agilent38MB | 11:67352689 | missense | A/A | 1.55E-15 | 209 | 99 | 35 | 99 | 0/0 | 0/0 | 0/0 | match | match | match |
| 108971 | TruSeqV2    | 11:67353579 | missense | C/T | 7.11E-14 | 71  | 99 | 33 | 99 | 0/1 | 0/1 | 0/1 | match | match | match |
| 115239 | TruSeqV2    | 11:67353579 | missense | C/T | 2.15E-13 | 41  | 99 | 21 | 99 | 0/1 | 0/1 | 0/1 | match | match | match |
| 132306 | Agilent38MB | 11:67353579 | missense | C/C | 2.94E-12 | 34  | 96 | 20 | 54 | 0/0 | 0/0 | 0/0 | match | match | match |
| 163383 | TruSeqV2    | 11:67353579 | missense | C/C | 5.34E-13 | 48  | 99 | 31 | 78 | 0/0 | 0/0 | 0/0 | match | match | match |
| 198564 | Agilent38MB | 11:67353579 | missense | C/C | 7.19E-14 | 62  | 99 | 31 | 78 | 0/0 | 0/0 | 0/0 | match | match | match |
| 108971 | TruSeqV2    | 11:67353677 | missense | G/G | 6.66E-16 | 85  | 99 | 36 | 88 | 0/0 | 0/0 | 0/0 | match | match | match |
| 115239 | TruSeqV2    | 11:67353677 | missense | G/G | 6.66E-16 | 45  | 99 | 33 | 81 | 0/0 | 0/0 | 0/0 | match | match | match |
| 132306 | Agilent38MB | 11:67353677 | missense | G/G | 2.00E-15 | 45  | 99 | 30 | 72 | 0/0 | 0/0 | 0/0 | match | match | match |
| 163383 | TruSeqV2    | 11:67353677 | missense | G/G | 1.33E-15 | 60  | 99 | 30 | 78 | 0/0 | 0/0 | 0/0 | match | match | match |
| 198564 | Agilent38MB | 11:67353677 | missense | G/G | 1.11E-15 | 83  | 99 | 29 | 78 | 0/0 | 0/0 | 0/0 | match | match | match |
| 108971 | TruSeqV2    | 11:74876951 | synon    | G/G | 8.88E-15 | 121 | 99 | 33 | 87 | 0/0 | 0/0 | 0/0 | match | match | match |
| 115239 | TruSeqV2    | 11:74876951 | synon    | G/G | 6.88E-15 | 78  | 99 | 20 | 54 | 0/0 | 0/0 | 0/0 | match | match | match |
| 132306 | Agilent38MB | 11:74876951 | synon    | G/G | 1.55E-15 | 39  | 96 | 28 | 71 | 0/0 | 0/0 | 0/0 | match | match | match |
| 163383 | TruSeqV2    | 11:74876951 | synon    | G/G | 3.83E-13 | 87  | 99 | 42 | 99 | 0/0 | 0/0 | 0/0 | match | match | match |
| 198564 | Agilent38MB | 11:74876951 | synon    | G/G | 1.08E-13 | 71  | 99 | 45 | 99 | 0/0 | 0/0 | 0/0 | match | match | match |
| 108971 | TruSeqV2    | 11:74880413 | missense | A/A | 2.22E-16 | 91  | 99 | 30 | 78 | 0/0 | 0/0 | 0/0 | match | match | match |
| 115239 | TruSeqV2    | 11:74880413 | missense | A/A | 2.22E-16 | 78  | 99 | 19 | 25 | 0/0 | 0/0 | 0/0 | match | match | match |
| 132306 | Agilent38MB | 11:74880413 | missense | A/A | 2.22E-16 | 109 | 99 | 39 | 99 | 0/0 | 0/0 | 0/0 | match | match | match |
| 163383 | TruSeqV2    | 11:74880413 | missense | A/A | 2.22E-16 | 92  | 99 | 30 | 78 | 0/0 | 0/0 | 0/0 | match | match | match |
| 198564 | Agilent38MB | 11:74880413 | missense | A/A | 4.88E-15 | 210 | 99 | 44 | 99 | 0/0 | 0/0 | 0/0 | match | match | match |
| 108971 | TruSeqV2    | 11:74904362 | missense | C/C | 6.66E-16 | 246 | 99 | 30 | 89 | 1/1 | 1/1 | 1/1 | match | match | match |
| 115239 | TruSeqV2    | 11:74904362 | missense | C/C | 1.78E-15 | 175 | 99 | 17 | 51 | 1/1 | 1/1 | 1/1 | match | match | match |
| 132306 | Agilent38MB | 11:74904362 | missense | C/C | 6.66E-16 | 123 | 99 | 36 | 99 | 1/1 | 1/1 | 1/1 | match | match | match |
| 163383 | TruSeqV2    | 11:74904362 | missense | C/C | 8.88E-16 | 154 | 99 | 27 | 81 | 1/1 | 1/1 | 1/1 | match | match | match |

|        |             |              |          |     |          |     |    |    |    |     |     |     |       |       |       |
|--------|-------------|--------------|----------|-----|----------|-----|----|----|----|-----|-----|-----|-------|-------|-------|
| 198564 | Agilent38MB | 11:74904362  | missense | C/C | 8.88E-16 | 232 | 99 | 28 | 77 | 1/1 | 1/1 | 1/1 | match | match | match |
| 108971 | TruSeqV2    | 11:74907421  | intronic | G/G | 8.88E-16 | 23  | 66 | 35 | 96 | 0/0 | 0/0 | 0/0 | match | match | match |
| 115239 | TruSeqV2    | 11:74907421  | intronic | G/G | 6.44E-15 | 17  | 39 | 27 | 63 | 0/0 | 0/0 | 0/0 | match | match | match |
| 163383 | TruSeqV2    | 11:74907421  | intronic | G/G | 1.11E-15 | 24  | 69 | 24 | 57 | 0/0 | 0/0 | 0/0 | match | match | match |
| 198564 | Agilent38MB | 11:74907421  | intronic | G/G | 6.66E-16 | 3   | 9  | 35 | 90 | 0/0 | 0/0 | 0/0 | match | match | match |
| 108971 | TruSeqV2    | 11:74907637  | synon    | C/C | 5.11E-15 | 182 | 99 | 46 | 99 | 0/0 | 0/0 | 0/0 | match | match | match |
| 115239 | TruSeqV2    | 11:74907637  | synon    | C/C | 6.00E-15 | 138 | 99 | 23 | 51 | 0/0 | 0/0 | 0/0 | match | match | match |
| 132306 | Agilent38MB | 11:74907637  | synon    | C/C | 3.33E-15 | 50  | 99 | 38 | 99 | 0/0 | 0/0 | 0/0 | match | match | match |
| 163383 | TruSeqV2    | 11:74907637  | synon    | C/C | 1.78E-15 | 125 | 99 | 41 | 99 | 0/0 | 0/0 | 0/0 | match | match | match |
| 198564 | Agilent38MB | 11:74907637  | synon    | C/C | 1.55E-15 | 112 | 99 | 40 | 93 | 0/0 | 0/0 | 0/0 | match | match | match |
| 132306 | Agilent38MB | 12:105152960 | 3'UTR    | A/A | 4.44E-16 | 1   | 3  | 32 | 90 | 0/0 | 0/0 | 0/0 | match | match | match |
| 198564 | Agilent38MB | 12:105153570 | 3'UTR    | T/T | 3.33E-15 | 2   | 6  | 23 | 69 | 1/1 | 1/1 | 1/1 | match | match | match |
| 132306 | Agilent38MB | 12:105155627 | 3'UTR    | A/A | 1.55E-15 | 1   | 3  | 27 | 72 | 0/0 | 0/0 | 0/0 | match | match | match |
| 108971 | TruSeqV2    | 12:112204427 | promoter | A/A | 2.47E-11 | 80  | 99 | 15 | 42 | 0/0 | 0/0 | 0/0 | match | match | match |
| 115239 | TruSeqV2    | 12:112204427 | promoter | A/G | 2.66E-15 | 42  | 99 | 17 | 99 | 0/1 | 0/1 | 0/1 | match | match | match |
| 132306 | Agilent38MB | 12:112204427 | promoter | A/A | 5.55E-15 | 4   | 12 | 21 | 57 | 0/0 | 0/0 | 0/0 | match | match | match |
| 163383 | TruSeqV2    | 12:112204427 | promoter | A/A | 9.99E-15 | 56  | 99 | 20 | 60 | 0/0 | 0/0 | 0/0 | match | match | match |
| 198564 | Agilent38MB | 12:112204427 | promoter | A/A | 8.24E-13 | 5   | 15 | 22 | 63 | 0/0 | 0/0 | 0/0 | match | match | match |
| 108971 | TruSeqV2    | 12:112221055 | synon    | C/C | 1.98E-10 | 81  | 99 | 47 | 99 | 0/0 | 0/0 | 0/0 | match | match | match |
| 115239 | TruSeqV2    | 12:112221055 | synon    | C/C | 1.07E-14 | 47  | 99 | 8  | 15 | 0/0 | 0/0 | 0/0 | match | match | match |
| 132306 | Agilent38MB | 12:112221055 | synon    | C/C | 4.60E-14 | 60  | 99 | 29 | 81 | 0/0 | 0/0 | 0/0 | match | match | match |
| 163383 | TruSeqV2    | 12:112221055 | synon    | C/C | 1.40E-14 | 69  | 99 | 31 | 81 | 0/0 | 0/0 | 0/0 | match | match | match |
| 198564 | Agilent38MB | 12:112221055 | synon    | C/C | 3.73E-14 | 85  | 99 | 34 | 84 | 0/0 | 0/0 | 0/0 | match | match | match |
| 108971 | TruSeqV2    | 12:112228249 | synon    | G/G | 2.22E-16 | 177 | 99 | 36 | 99 | 0/0 | 0/0 | 0/0 | match | match | match |
| 115239 | TruSeqV2    | 12:112228249 | synon    | G/G | 4.44E-16 | 108 | 99 | 25 | 69 | 0/0 | 0/0 | 0/0 | match | match | match |
| 132306 | Agilent38MB | 12:112228249 | synon    | G/G | 2.22E-16 | 83  | 99 | 18 | 51 | 0/0 | 0/0 | 0/0 | match | match | match |
| 163383 | TruSeqV2    | 12:112228249 | synon    | G/G | 2.22E-16 | 127 | 99 | 34 | 96 | 0/0 | 0/0 | 0/0 | match | match | match |
| 198564 | Agilent38MB | 12:112228249 | synon    | G/G | 8.22E-15 | 192 | 99 | 41 | 99 | 0/0 | 0/0 | 0/0 | match | match | match |
| 108971 | TruSeqV2    | 12:112230513 | missense | A/A | 8.44E-15 | 116 | 99 | 26 | 60 | 0/0 | 0/0 | 0/0 | match | match | match |
| 115239 | TruSeqV2    | 12:112230513 | missense | A/A | 1.11E-15 | 85  | 99 | 15 | 33 | 0/0 | 0/0 | 0/0 | match | match | match |
| 132306 | Agilent38MB | 12:112230513 | missense | A/A | 1.11E-15 | 12  | 27 | 37 | 99 | 0/0 | 0/0 | 0/0 | match | match | match |
| 163383 | TruSeqV2    | 12:112230513 | missense | A/A | 2.22E-15 | 78  | 99 | 32 | 78 | 0/0 | 0/0 | 0/0 | match | match | match |
| 198564 | Agilent38MB | 12:112230513 | missense | A/A | 9.10E-15 | 22  | 42 | 31 | 81 | 0/0 | 0/0 | 0/0 | match | match | match |
| 108971 | TruSeqV2    | 12:112241723 | synon    | G/G | 2.22E-16 | 140 | 99 | 28 | 75 | 0/0 | 0/0 | 0/0 | match | match | match |
| 115239 | TruSeqV2    | 12:112241723 | synon    | G/G | 8.88E-16 | 82  | 99 | 17 | 45 | 0/0 | 0/0 | 0/0 | match | match | match |
| 132306 | Agilent38MB | 12:112241723 | synon    | G/G | 1.33E-15 | 28  | 66 | 38 | 99 | 0/0 | 0/0 | 0/0 | match | match | match |
| 163383 | TruSeqV2    | 12:112241723 | synon    | G/G | 1.78E-15 | 82  | 99 | 29 | 75 | 0/0 | 0/0 | 0/0 | match | match | match |
| 198564 | Agilent38MB | 12:112241723 | synon    | G/G | 8.88E-16 | 52  | 99 | 25 | 57 | 0/0 | 0/0 | 0/0 | match | match | match |

|        |             |              |          |     |          |     |    |    |    |     |     |     |       |       |       |
|--------|-------------|--------------|----------|-----|----------|-----|----|----|----|-----|-----|-----|-------|-------|-------|
| 108971 | TruSeqV2    | 12:112241766 | missense | G/G | 2.44E-15 | 116 | 99 | 36 | 99 | 0/0 | 0/0 | 0/0 | match | match | match |
| 115239 | TruSeqV2    | 12:112241766 | missense | G/G | 1.55E-15 | 69  | 99 | 20 | 51 | 0/0 | 0/0 | 0/0 | match | match | match |
| 132306 | Agilent38MB | 12:112241766 | missense | G/G | 1.11E-15 | 10  | 27 | 29 | 66 | 0/0 | 0/0 | 0/0 | match | match | match |
| 163383 | TruSeqV2    | 12:112241766 | missense | G/G | 2.42E-14 | 73  | 99 | 31 | 75 | 0/0 | 0/0 | 0/0 | match | match | match |
| 198564 | Agilent38MB | 12:112241766 | missense | G/G | 4.88E-15 | 36  | 84 | 26 | 72 | 0/0 | 0/0 | 0/0 | match | match | match |
| 108971 | TruSeqV2    | 12:21011480  | missense | G/T | 9.11E-13 | 61  | 99 | 34 | 99 | 0/1 | 0/1 | 0/1 | match | match | match |
| 115239 | TruSeqV2    | 12:21011480  | missense | G/G | 2.22E-15 | 55  | 99 | 39 | 99 | 1/1 | 1/1 | 1/1 | match | match | match |
| 132306 | Agilent38MB | 12:21011480  | missense | G/G | 3.11E-15 | 140 | 99 | 43 | 99 | 1/1 | 1/1 | 1/1 | match | match | match |
| 163383 | TruSeqV2    | 12:21011480  | missense | G/G | 1.31E-14 | 65  | 99 | 40 | 99 | 1/1 | 1/1 | 1/1 | match | match | match |
| 198564 | Agilent38MB | 12:21011480  | missense | G/G | 1.55E-14 | 206 | 99 | 42 | 99 | 1/1 | 1/1 | 1/1 | match | match | match |
| 108971 | TruSeqV2    | 12:21015760  | missense | A/G | 5.83E-13 | 219 | 99 | 34 | 99 | 0/1 | 0/1 | 0/1 | match | match | match |
| 115239 | TruSeqV2    | 12:21015760  | missense | A/A | 3.33E-15 | 109 | 99 | 45 | 99 | 1/1 | 1/1 | 1/1 | match | match | match |
| 132306 | Agilent38MB | 12:21015760  | missense | A/A | 2.66E-15 | 151 | 99 | 45 | 99 | 1/1 | 1/1 | 1/1 | match | match | match |
| 163383 | TruSeqV2    | 12:21015760  | missense | A/A | 7.55E-15 | 184 | 99 | 29 | 87 | 1/1 | 1/1 | 1/1 | match | match | match |
| 198564 | Agilent38MB | 12:21015760  | missense | A/A | 2.44E-15 | 259 | 99 | 28 | 84 | 1/1 | 1/1 | 1/1 | match | match | match |
| 108971 | TruSeqV2    | 12:21028282  | fs       | A/A | 3.11E-15 | 31  | 78 | 38 | 99 | 0/0 | 0/0 | 0/0 | match | match | match |
| 115239 | TruSeqV2    | 12:21028282  | fs       | A/A | 1.24E-14 | 31  | 78 | 38 | 99 | 0/0 | 0/0 | 0/0 | match | match | match |
| 132306 | Agilent38MB | 12:21028282  | fs       | A/A | 6.66E-16 | 31  | 78 | 38 | 99 | 0/0 | 0/0 | 0/0 | match | match | match |
| 163383 | TruSeqV2    | 12:21028282  | fs       | A/A | 9.77E-15 | 31  | 78 | 38 | 99 | 0/0 | 0/0 | 0/0 | match | match | match |
| 198564 | Agilent38MB | 12:21028282  | fs       | A/A | 3.78E-13 | 31  | 78 | 38 | 99 | 0/0 | 0/0 | 0/0 | match | match | match |
| 108971 | TruSeqV2    | 12:21032506  | synon    | A/A | 4.44E-16 | 95  | 99 | 48 | 99 | 0/0 | 0/0 | 0/0 | match | match | match |
| 115239 | TruSeqV2    | 12:21032506  | synon    | A/A | 8.88E-16 | 68  | 99 | 43 | 99 | 0/0 | 0/0 | 0/0 | match | match | match |
| 132306 | Agilent38MB | 12:21032506  | synon    | A/A | 4.44E-16 | 50  | 99 | 33 | 90 | 0/0 | 0/0 | 0/0 | match | match | match |
| 163383 | TruSeqV2    | 12:21032506  | synon    | A/A | 4.44E-16 | 92  | 99 | 34 | 87 | 0/0 | 0/0 | 0/0 | match | match | match |
| 198564 | Agilent38MB | 12:21032506  | synon    | A/A | 1.78E-15 | 96  | 99 | 50 | 99 | 0/0 | 0/0 | 0/0 | match | match | match |
| 108971 | TruSeqV2    | 12:21036411  | synon    | A/G | 8.90E-08 | 75  | 99 | 32 | 99 | 0/1 | 0/1 | 0/1 | match | match | match |
| 115239 | TruSeqV2    | 12:21036411  | synon    | G/G | 1.11E-15 | 52  | 99 | 36 | 63 | 1/1 | 1/1 | 1/1 | match | match | match |
| 132306 | Agilent38MB | 12:21036411  | synon    | G/G | 4.44E-16 | 83  | 99 | 34 | 99 | 1/1 | 1/1 | 1/1 | match | match | match |
| 163383 | TruSeqV2    | 12:21036411  | synon    | G/G | 4.44E-16 | 77  | 99 | 39 | 99 | 1/1 | 1/1 | 1/1 | match | match | match |
| 198564 | Agilent38MB | 12:21036411  | synon    | G/G | 1.55E-15 | 108 | 99 | 49 | 99 | 1/1 | 1/1 | 1/1 | match | match | match |
| 108971 | TruSeqV2    | 12:21054369  | synon    | A/G | 6.88E-15 | 76  | 99 | 46 | 99 | 0/1 | 0/1 | 0/1 | match | match | match |
| 115239 | TruSeqV2    | 12:21054369  | synon    | A/A | 1.04E-14 | 51  | 99 | 32 | 53 | 1/1 | 1/1 | 1/1 | match | match | match |
| 132306 | Agilent38MB | 12:21054369  | synon    | A/A | 3.02E-13 | 44  | 99 | 27 | 81 | 1/1 | 1/1 | 1/1 | match | match | match |
| 163383 | TruSeqV2    | 12:21054369  | synon    | A/A | 2.53E-14 | 79  | 99 | 47 | 99 | 1/1 | 1/1 | 1/1 | match | match | match |
| 198564 | Agilent38MB | 12:21054369  | synon    | A/A | 5.84E-14 | 65  | 99 | 52 | 99 | 1/1 | 1/1 | 1/1 | match | match | match |
| 108971 | TruSeqV2    | 12:21069155  | fs       | -/- | 2.22E-16 | 107 | 99 | 48 | 99 | 0/0 | 0/0 | 0/0 | match | match | match |
| 115239 | TruSeqV2    | 12:21069155  | fs       | -/- | 4.44E-16 | 107 | 99 | 48 | 99 | 0/0 | 0/0 | 0/0 | match | match | match |
| 132306 | Agilent38MB | 12:21069155  | fs       | -/- | 4.44E-16 | 107 | 99 | 48 | 99 | 0/0 | 0/0 | 0/0 | match | match | match |

|        |             |             |          |     |          |     |    |    |    |     |     |     |       |       |       |
|--------|-------------|-------------|----------|-----|----------|-----|----|----|----|-----|-----|-----|-------|-------|-------|
| 163383 | TruSeqV2    | 12:21069155 | fs       | -/- | 2.22E-16 | 107 | 99 | 48 | 99 | 0/0 | 0/0 | 0/0 | match | match | match |
| 198564 | Agilent38MB | 12:21069155 | fs       | -/- | 1.11E-15 | 107 | 99 | 48 | 99 | 0/0 | 0/0 | 0/0 | match | match | match |
| 108971 | TruSeqV2    | 12:21325716 | missense | T/T | 6.66E-16 | 63  | 99 | 39 | 99 | 0/0 | 0/0 | 0/0 | match | match | match |
| 115239 | TruSeqV2    | 12:21325716 | missense | T/T | 6.66E-16 | 46  | 99 | 42 | 99 | 0/0 | 0/0 | 0/0 | match | match | match |
| 132306 | Agilent38MB | 12:21325716 | missense | T/T | 2.22E-16 | 20  | 45 | 39 | 99 | 0/0 | 0/0 | 0/0 | match | match | match |
| 163383 | TruSeqV2    | 12:21325716 | missense | T/T | 4.44E-16 | 58  | 99 | 50 | 99 | 0/0 | 0/0 | 0/0 | match | match | match |
| 198564 | Agilent38MB | 12:21325716 | missense | T/T | 9.99E-15 | 32  | 60 | 43 | 99 | 0/0 | 0/0 | 0/0 | match | match | match |
| 108971 | TruSeqV2    | 12:21327529 | synon    | T/T | 4.44E-16 | 50  | 99 | 46 | 99 | 0/0 | 0/0 | 0/0 | match | match | match |
| 115239 | TruSeqV2    | 12:21327529 | synon    | T/T | 2.22E-16 | 28  | 69 | 48 | 99 | 0/0 | 0/0 | 0/0 | match | match | match |
| 132306 | Agilent38MB | 12:21327529 | synon    | T/T | 8.88E-16 | 41  | 99 | 51 | 99 | 0/0 | 0/0 | 0/0 | match | match | match |
| 163383 | TruSeqV2    | 12:21327529 | synon    | T/T | 4.44E-16 | 39  | 99 | 45 | 99 | 0/0 | 0/0 | 0/0 | match | match | match |
| 198564 | Agilent38MB | 12:21327529 | synon    | T/T | 4.22E-15 | 103 | 99 | 58 | 99 | 0/0 | 0/0 | 0/0 | match | match | match |
| 108971 | TruSeqV2    | 12:21329738 | missense | A/A | 4.00E-15 | 36  | 99 | 50 | 99 | 0/0 | 0/0 | 0/0 | match | match | match |
| 115239 | TruSeqV2    | 12:21329738 | missense | A/G | 1.09E-14 | 16  | 99 | 42 | 99 | 0/1 | 0/1 | 0/1 | match | match | match |
| 132306 | Agilent38MB | 12:21329738 | missense | A/G | 1.78E-15 | 66  | 99 | 43 | 99 | 0/1 | 0/1 | 0/1 | match | match | match |
| 163383 | TruSeqV2    | 12:21329738 | missense | A/A | 8.66E-15 | 35  | 99 | 53 | 99 | 0/0 | 0/0 | 0/0 | match | match | match |
| 198564 | Agilent38MB | 12:21329738 | missense | A/A | 8.68E-14 | 163 | 99 | 46 | 99 | 0/0 | 0/0 | 0/0 | match | match | match |
| 108971 | TruSeqV2    | 12:21329802 | missense | A/A | 4.44E-16 | 40  | 99 | 49 | 99 | 0/0 | 0/0 | 0/0 | match | match | match |
| 115239 | TruSeqV2    | 12:21329802 | missense | A/A | 2.22E-16 | 14  | 39 | 40 | 99 | 0/0 | 0/0 | 0/0 | match | match | match |
| 132306 | Agilent38MB | 12:21329802 | missense | A/A | 1.55E-15 | 57  | 99 | 52 | 99 | 0/0 | 0/0 | 0/0 | match | match | match |
| 163383 | TruSeqV2    | 12:21329802 | missense | A/A | 4.44E-16 | 45  | 99 | 50 | 99 | 0/0 | 0/0 | 0/0 | match | match | match |
| 198564 | Agilent38MB | 12:21329802 | missense | A/A | 8.88E-16 | 132 | 99 | 45 | 99 | 0/0 | 0/0 | 0/0 | match | match | match |
| 108971 | TruSeqV2    | 12:21329813 | missense | C/C | 6.66E-16 | 37  | 93 | 45 | 99 | 0/0 | 0/0 | 0/0 | match | match | match |
| 115239 | TruSeqV2    | 12:21329813 | missense | A/C | 3.11E-15 | 14  | 99 | 38 | 99 | 0/1 | 0/1 | 0/1 | match | match | match |
| 132306 | Agilent38MB | 12:21329813 | missense | A/C | 2.44E-15 | 68  | 99 | 48 | 99 | 0/1 | 0/1 | 0/1 | match | match | match |
| 163383 | TruSeqV2    | 12:21329813 | missense | C/C | 8.88E-15 | 46  | 66 | 44 | 99 | 0/0 | 0/0 | 0/0 | match | match | match |
| 198564 | Agilent38MB | 12:21329813 | missense | C/C | 7.46E-14 | 132 | 99 | 45 | 99 | 0/0 | 0/0 | 0/0 | match | match | match |
| 108971 | TruSeqV2    | 12:21329817 | missense | A/A | 2.66E-15 | 36  | 90 | 46 | 99 | 0/0 | 0/0 | 0/0 | match | match | match |
| 115239 | TruSeqV2    | 12:21329817 | missense | A/A | 6.66E-16 | 14  | 39 | 40 | 99 | 0/0 | 0/0 | 0/0 | match | match | match |
| 132306 | Agilent38MB | 12:21329817 | missense | A/A | 2.22E-15 | 65  | 99 | 46 | 99 | 0/0 | 0/0 | 0/0 | match | match | match |
| 163383 | TruSeqV2    | 12:21329817 | missense | A/A | 1.78E-15 | 47  | 99 | 47 | 99 | 0/0 | 0/0 | 0/0 | match | match | match |
| 198564 | Agilent38MB | 12:21329817 | missense | A/A | 1.78E-15 | 137 | 99 | 43 | 99 | 0/0 | 0/0 | 0/0 | match | match | match |
| 108971 | TruSeqV2    | 12:21331549 | missense | T/T | 1.33E-15 | 90  | 99 | 52 | 99 | 0/0 | 0/0 | 0/0 | match | match | match |
| 115239 | TruSeqV2    | 12:21331549 | missense | T/T | 2.44E-15 | 72  | 99 | 35 | 96 | 0/0 | 0/0 | 0/0 | match | match | match |
| 132306 | Agilent38MB | 12:21331549 | missense | T/T | 1.55E-15 | 164 | 99 | 41 | 99 | 0/0 | 0/0 | 0/0 | match | match | match |
| 163383 | TruSeqV2    | 12:21331549 | missense | T/T | 1.33E-15 | 89  | 99 | 46 | 99 | 0/0 | 0/0 | 0/0 | match | match | match |
| 198564 | Agilent38MB | 12:21331549 | missense | T/T | 5.11E-15 | 354 | 99 | 40 | 93 | 0/0 | 0/0 | 0/0 | match | match | match |
| 108971 | TruSeqV2    | 12:21331599 | synon    | C/T | 9.37E-14 | 81  | 99 | 38 | 99 | 0/1 | 0/1 | 0/1 | match | match | match |



|        |             |             |          |     |          |     |    |    |    |     |     |     |       |       |       |
|--------|-------------|-------------|----------|-----|----------|-----|----|----|----|-----|-----|-----|-------|-------|-------|
| 132306 | Agilent38MB | 12:21331599 | synon    | C/T | 4.44E-15 | 155 | 99 | 45 | 99 | 0/1 | 0/1 | 0/1 | match | match | match |
| 163383 | TruSeqV2    | 12:21331599 | synon    | C/T | 4.22E-15 | 94  | 99 | 44 | 99 | 0/1 | 0/1 | 0/1 | match | match | match |
| 198564 | Agilent38MB | 12:21331599 | synon    | C/T | 3.20E-14 | 302 | 99 | 35 | 99 | 0/1 | 0/1 | 0/1 | match | match | match |
| 108971 | TruSeqV2    | 12:21331606 | missense | T/T | 8.88E-16 | 84  | 99 | 39 | 99 | 0/0 | 0/0 | 0/0 | match | match | match |
| 115239 | TruSeqV2    | 12:21331606 | missense | T/T | 6.66E-16 | 56  | 99 | 31 | 49 | 0/0 | 0/0 | 0/0 | match | match | match |
| 132306 | Agilent38MB | 12:21331606 | missense | T/T | 9.99E-15 | 161 | 99 | 46 | 99 | 0/0 | 0/0 | 0/0 | match | match | match |
| 163383 | TruSeqV2    | 12:21331606 | missense | T/T | 6.66E-16 | 97  | 99 | 42 | 99 | 0/0 | 0/0 | 0/0 | match | match | match |
| 198564 | Agilent38MB | 12:21331606 | missense | T/T | 6.66E-16 | 314 | 99 | 36 | 96 | 0/0 | 0/0 | 0/0 | match | match | match |
| 108971 | TruSeqV2    | 12:21331625 | synon    | C/C | 7.55E-15 | 84  | 99 | 35 | 90 | 0/0 | 0/0 | 0/0 | match | match | match |
| 115239 | TruSeqV2    | 12:21331625 | synon    | C/T | 1.55E-15 | 52  | 99 | 37 | 99 | 0/1 | 0/1 | 0/1 | match | match | match |
| 132306 | Agilent38MB | 12:21331625 | synon    | C/T | 6.66E-16 | 144 | 99 | 41 | 99 | 0/1 | 0/1 | 0/1 | match | match | match |
| 163383 | TruSeqV2    | 12:21331625 | synon    | C/C | 1.11E-15 | 100 | 99 | 46 | 99 | 0/0 | 0/0 | 0/0 | match | match | match |
| 198564 | Agilent38MB | 12:21331625 | synon    | C/C | 9.33E-15 | 330 | 99 | 41 | 99 | 0/0 | 0/0 | 0/0 | match | match | match |
| 108971 | TruSeqV2    | 12:21353478 | missense | C/C | 1.11E-15 | 53  | 99 | 61 | 99 | 0/0 | 0/0 | 0/0 | match | match | match |
| 115239 | TruSeqV2    | 12:21353478 | missense | C/C | 4.44E-16 | 41  | 99 | 42 | 99 | 0/0 | 0/0 | 0/0 | match | match | match |
| 132306 | Agilent38MB | 12:21353478 | missense | C/C | 2.22E-16 | 47  | 99 | 32 | 87 | 0/0 | 0/0 | 0/0 | match | match | match |
| 163383 | TruSeqV2    | 12:21353478 | missense | C/C | 1.55E-15 | 54  | 99 | 44 | 99 | 0/0 | 0/0 | 0/0 | match | match | match |
| 198564 | Agilent38MB | 12:21353478 | missense | C/C | 1.04E-13 | 117 | 99 | 64 | 99 | 0/0 | 0/0 | 0/0 | match | match | match |
| 108971 | TruSeqV2    | 12:21353529 | missense | T/T | 5.92E-13 | 82  | 99 | 41 | 99 | 0/0 | 0/0 | 0/0 | match | match | match |
| 115239 | TruSeqV2    | 12:21353529 | missense | T/T | 5.60E-14 | 59  | 99 | 41 | 99 | 0/0 | 0/0 | 0/0 | match | match | match |
| 132306 | Agilent38MB | 12:21353529 | missense | T/T | 4.00E-15 | 42  | 99 | 32 | 59 | 0/0 | 0/0 | 0/0 | match | match | match |
| 163383 | TruSeqV2    | 12:21353529 | missense | T/T | 5.73E-14 | 68  | 99 | 52 | 99 | 0/0 | 0/0 | 0/0 | match | match | match |
| 198564 | Agilent38MB | 12:21353529 | missense | T/T | 2.81E-13 | 112 | 99 | 60 | 99 | 0/0 | 0/0 | 0/0 | match | match | match |
| 108971 | TruSeqV2    | 12:21355583 | missense | A/A | 1.09E-14 | 34  | 84 | 35 | 93 | 0/0 | 0/0 | 0/0 | match | match | match |
| 115239 | TruSeqV2    | 12:21355583 | missense | A/A | 1.96E-13 | 35  | 93 | 37 | 93 | 0/0 | 0/0 | 0/0 | match | match | match |
| 132306 | Agilent38MB | 12:21355583 | missense | A/A | 1.78E-15 | 49  | 99 | 35 | 90 | 0/0 | 0/0 | 0/0 | match | match | match |
| 163383 | TruSeqV2    | 12:21355583 | missense | A/A | 3.11E-15 | 31  | 90 | 31 | 90 | 0/0 | 0/0 | 0/0 | match | match | match |
| 198564 | Agilent38MB | 12:21355583 | missense | A/A | 3.00E-14 | 90  | 99 | 49 | 99 | 0/0 | 0/0 | 0/0 | match | match | match |
| 108971 | TruSeqV2    | 12:21358855 | missense | A/A | 4.44E-16 | 55  | 99 | 63 | 99 | 0/0 | 0/0 | 0/0 | match | match | match |
| 115239 | TruSeqV2    | 12:21358855 | missense | A/A | 2.22E-16 | 44  | 99 | 51 | 99 | 0/0 | 0/0 | 0/0 | match | match | match |
| 132306 | Agilent38MB | 12:21358855 | missense | A/A | 4.44E-16 | 184 | 99 | 32 | 96 | 0/0 | 0/0 | 0/0 | match | match | match |
| 163383 | TruSeqV2    | 12:21358855 | missense | A/A | 2.22E-16 | 54  | 99 | 42 | 99 | 0/0 | 0/0 | 0/0 | match | match | match |
| 198564 | Agilent38MB | 12:21358855 | missense | A/A | 2.22E-16 | 313 | 99 | 50 | 99 | 0/0 | 0/0 | 0/0 | match | match | match |
| 108971 | TruSeqV2    | 12:21358933 | missense | G/G | 2.22E-16 | 59  | 99 | 42 | 99 | 0/0 | 0/0 | 0/0 | match | match | match |
| 115239 | TruSeqV2    | 12:21358933 | missense | G/G | 4.44E-16 | 47  | 99 | 45 | 99 | 0/0 | 0/0 | 0/0 | match | match | match |
| 132306 | Agilent38MB | 12:21358933 | missense | G/G | 2.22E-16 | 171 | 99 | 48 | 99 | 0/0 | 0/0 | 0/0 | match | match | match |
| 163383 | TruSeqV2    | 12:21358933 | missense | G/G | 4.44E-16 | 46  | 99 | 43 | 99 | 0/0 | 0/0 | 0/0 | match | match | match |
| 198564 | Agilent38MB | 12:21358933 | missense | G/G | 2.89E-15 | 269 | 99 | 56 | 99 | 0/0 | 0/0 | 0/0 | match | match | match |

|        |             |             |          |     |          |     |    |    |    |     |     |     |       |       |       |
|--------|-------------|-------------|----------|-----|----------|-----|----|----|----|-----|-----|-----|-------|-------|-------|
| 108971 | TruSeqV2    | 12:21392011 | missense | A/A | 2.22E-16 | 52  | 99 | 29 | 78 | 0/0 | 0/0 | 0/0 | match | match | match |
| 115239 | TruSeqV2    | 12:21392011 | missense | A/A | 4.44E-16 | 55  | 99 | 38 | 96 | 0/0 | 0/0 | 0/0 | match | match | match |
| 132306 | Agilent38MB | 12:21392011 | missense | A/A | 2.22E-16 | 7   | 15 | 35 | 90 | 0/0 | 0/0 | 0/0 | match | match | match |
| 163383 | TruSeqV2    | 12:21392011 | missense | A/A | 2.22E-16 | 52  | 99 | 51 | 99 | 0/0 | 0/0 | 0/0 | match | match | match |
| 198564 | Agilent38MB | 12:21392011 | missense | A/A | 4.44E-16 | 14  | 33 | 52 | 99 | 0/0 | 0/0 | 0/0 | match | match | match |
| 108971 | TruSeqV2    | 12:21392047 | missense | A/A | 2.22E-16 | 75  | 99 | 41 | 99 | 0/0 | 0/0 | 0/0 | match | match | match |
| 115239 | TruSeqV2    | 12:21392047 | missense | A/A | 2.22E-16 | 62  | 99 | 44 | 99 | 0/0 | 0/0 | 0/0 | match | match | match |
| 132306 | Agilent38MB | 12:21392047 | missense | A/A | 2.22E-16 | 16  | 45 | 38 | 99 | 0/0 | 0/0 | 0/0 | match | match | match |
| 163383 | TruSeqV2    | 12:21392047 | missense | A/A | 2.22E-16 | 67  | 99 | 50 | 99 | 0/0 | 0/0 | 0/0 | match | match | match |
| 198564 | Agilent38MB | 12:21392047 | missense | A/A | 2.22E-16 | 27  | 75 | 48 | 99 | 0/0 | 0/0 | 0/0 | match | match | match |
| 108971 | TruSeqV2    | 12:21422492 | missense | G/G | 1.78E-15 | 141 | 99 | 56 | 99 | 0/0 | 0/0 | 0/0 | match | match | match |
| 115239 | TruSeqV2    | 12:21422492 | missense | G/G | 1.78E-15 | 95  | 99 | 50 | 99 | 0/0 | 0/0 | 0/0 | match | match | match |
| 132306 | Agilent38MB | 12:21422492 | missense | G/G | 1.11E-15 | 130 | 99 | 42 | 99 | 0/0 | 0/0 | 0/0 | match | match | match |
| 163383 | TruSeqV2    | 12:21422492 | missense | G/G | 2.00E-15 | 143 | 99 | 54 | 99 | 0/0 | 0/0 | 0/0 | match | match | match |
| 198564 | Agilent38MB | 12:21422492 | missense | G/G | 1.02E-14 | 185 | 99 | 59 | 99 | 0/0 | 0/0 | 0/0 | match | match | match |
| 108971 | TruSeqV2    | 12:21450350 | missense | T/T | 2.44E-15 | 108 | 99 | 36 | 93 | 0/0 | 0/0 | 0/0 | match | match | match |
| 115239 | TruSeqV2    | 12:21450350 | missense | T/T | 1.33E-15 | 99  | 99 | 45 | 99 | 0/0 | 0/0 | 0/0 | match | match | match |
| 132306 | Agilent38MB | 12:21450350 | missense | T/T | 1.24E-14 | 167 | 99 | 42 | 99 | 0/0 | 0/0 | 0/0 | match | match | match |
| 163383 | TruSeqV2    | 12:21450350 | missense | T/T | 2.22E-15 | 111 | 99 | 41 | 87 | 0/0 | 0/0 | 0/0 | match | match | match |
| 198564 | Agilent38MB | 12:21450350 | missense | T/T | 1.33E-15 | 322 | 99 | 51 | 99 | 0/0 | 0/0 | 0/0 | match | match | match |
| 108971 | TruSeqV2    | 12:21450445 | missense | A/A | 4.32E-09 | 102 | 99 | 49 | 99 | 0/0 | 0/0 | 0/0 | match | match | match |
| 115239 | TruSeqV2    | 12:21450445 | missense | A/A | 5.57E-08 | 80  | 99 | 49 | 99 | 0/0 | 0/0 | 0/0 | match | match | match |
| 132306 | Agilent38MB | 12:21450445 | missense | A/A | 1.34E-09 | 80  | 99 | 40 | 81 | 0/0 | 0/0 | 0/0 | match | match | match |
| 163383 | TruSeqV2    | 12:21450445 | missense | A/A | 1.59E-08 | 93  | 99 | 42 | 99 | 0/0 | 0/0 | 0/0 | match | match | match |
| 198564 | Agilent38MB | 12:21450445 | missense | A/A | 5.50E-08 | 142 | 99 | 58 | 99 | 0/0 | 0/0 | 0/0 | match | match | match |
| 108971 | TruSeqV2    | 12:21453351 | missense | T/T | 8.88E-15 | 89  | 99 | 56 | 99 | 0/0 | 0/0 | 0/0 | match | match | match |
| 115239 | TruSeqV2    | 12:21453351 | missense | T/T | 1.33E-15 | 80  | 99 | 50 | 99 | 0/0 | 0/0 | 0/0 | match | match | match |
| 132306 | Agilent38MB | 12:21453351 | missense | T/T | 7.77E-15 | 70  | 99 | 43 | 99 | 0/0 | 0/0 | 0/0 | match | match | match |
| 163383 | TruSeqV2    | 12:21453351 | missense | T/T | 3.11E-15 | 90  | 99 | 42 | 99 | 0/0 | 0/0 | 0/0 | match | match | match |
| 198564 | Agilent38MB | 12:21453351 | missense | T/T | 6.57E-14 | 147 | 99 | 55 | 99 | 0/0 | 0/0 | 0/0 | match | match | match |
| 108971 | TruSeqV2    | 12:21453359 | fs       | A/A | 2.22E-16 | 93  | 99 | 51 | 99 | 0/0 | 0/0 | 0/0 | match | match | match |
| 115239 | TruSeqV2    | 12:21453359 | fs       | A/A | 6.66E-16 | 93  | 99 | 51 | 99 | 0/0 | 0/0 | 0/0 | match | match | match |
| 132306 | Agilent38MB | 12:21453359 | fs       | A/A | 1.11E-15 | 93  | 99 | 51 | 99 | 0/0 | 0/0 | 0/0 | match | match | match |
| 163383 | TruSeqV2    | 12:21453359 | fs       | A/A | 1.78E-15 | 93  | 99 | 51 | 99 | 0/0 | 0/0 | 0/0 | match | match | match |
| 198564 | Agilent38MB | 12:21453359 | fs       | A/A | 6.66E-16 | 93  | 99 | 51 | 99 | 0/0 | 0/0 | 0/0 | match | match | match |
| 108971 | TruSeqV2    | 12:21453362 | missense | G/G | 4.44E-16 | 92  | 99 | 49 | 99 | 0/0 | 0/0 | 0/0 | match | match | match |
| 115239 | TruSeqV2    | 12:21453362 | missense | G/G | 1.11E-15 | 85  | 99 | 49 | 99 | 0/0 | 0/0 | 0/0 | match | match | match |
| 132306 | Agilent38MB | 12:21453362 | missense | G/G | 6.66E-16 | 73  | 99 | 42 | 99 | 0/0 | 0/0 | 0/0 | match | match | match |

|        |             |             |          |     |          |     |    |    |    |     |     |     |       |       |       |
|--------|-------------|-------------|----------|-----|----------|-----|----|----|----|-----|-----|-----|-------|-------|-------|
| 163383 | TruSeqV2    | 12:21453362 | missense | G/G | 1.11E-15 | 96  | 99 | 39 | 99 | 0/0 | 0/0 | 0/0 | match | match | match |
| 198564 | Agilent38MB | 12:21453362 | missense | G/G | 3.77E-15 | 156 | 99 | 57 | 99 | 0/0 | 0/0 | 0/0 | match | match | match |
| 108971 | TruSeqV2    | 12:21457434 | missense | T/T | 1.55E-15 | 75  | 99 | 44 | 99 | 0/0 | 0/0 | 0/0 | match | match | match |
| 115239 | TruSeqV2    | 12:21457434 | missense | T/T | 4.44E-16 | 53  | 99 | 47 | 99 | 0/0 | 0/0 | 0/0 | match | match | match |
| 132306 | Agilent38MB | 12:21457434 | missense | T/G | 3.38E-14 | 108 | 99 | 29 | 99 | 0/1 | 0/1 | 0/1 | match | match | match |
| 163383 | TruSeqV2    | 12:21457434 | missense | T/G | 7.77E-15 | 53  | 99 | 39 | 99 | 0/1 | 0/1 | 0/1 | match | match | match |
| 198564 | Agilent38MB | 12:21457434 | missense | T/G | 7.11E-15 | 221 | 99 | 48 | 99 | 0/1 | 0/1 | 0/1 | match | match | match |
| 108971 | TruSeqV2    | 12:21457448 | missense | G/G | 2.22E-16 | 74  | 99 | 40 | 99 | 0/0 | 0/0 | 0/0 | match | match | match |
| 115239 | TruSeqV2    | 12:21457448 | missense | G/G | 6.66E-16 | 51  | 99 | 44 | 99 | 0/0 | 0/0 | 0/0 | match | match | match |
| 132306 | Agilent38MB | 12:21457448 | missense | G/G | 2.22E-16 | 128 | 99 | 33 | 93 | 0/0 | 0/0 | 0/0 | match | match | match |
| 163383 | TruSeqV2    | 12:21457448 | missense | G/G | 2.22E-16 | 57  | 99 | 41 | 99 | 0/0 | 0/0 | 0/0 | match | match | match |
| 198564 | Agilent38MB | 12:21457448 | missense | G/G | 2.22E-16 | 269 | 99 | 48 | 99 | 0/0 | 0/0 | 0/0 | match | match | match |
| 108971 | TruSeqV2    | 12:21459854 | missense | T/T | 2.42E-14 | 108 | 99 | 44 | 99 | 0/0 | 0/0 | 0/0 | match | match | match |
| 115239 | TruSeqV2    | 12:21459854 | missense | T/T | 7.33E-14 | 64  | 99 | 51 | 99 | 0/0 | 0/0 | 0/0 | match | match | match |
| 132306 | Agilent38MB | 12:21459854 | missense | T/T | 8.88E-16 | 158 | 99 | 33 | 90 | 0/0 | 0/0 | 0/0 | match | match | match |
| 163383 | TruSeqV2    | 12:21459854 | missense | T/T | 9.99E-15 | 108 | 99 | 29 | 81 | 0/0 | 0/0 | 0/0 | match | match | match |
| 198564 | Agilent38MB | 12:21459854 | missense | T/T | 4.49E-12 | 302 | 99 | 56 | 99 | 0/0 | 0/0 | 0/0 | match | match | match |
| 108971 | TruSeqV2    | 12:21459876 | missense | T/T | 6.66E-16 | 107 | 99 | 46 | 99 | 0/0 | 0/0 | 0/0 | match | match | match |
| 115239 | TruSeqV2    | 12:21459876 | missense | T/T | 4.44E-16 | 68  | 99 | 50 | 99 | 0/0 | 0/0 | 0/0 | match | match | match |
| 132306 | Agilent38MB | 12:21459876 | missense | T/T | 6.66E-16 | 160 | 99 | 33 | 90 | 0/0 | 0/0 | 0/0 | match | match | match |
| 163383 | TruSeqV2    | 12:21459876 | missense | T/T | 4.44E-16 | 101 | 99 | 40 | 99 | 0/0 | 0/0 | 0/0 | match | match | match |
| 198564 | Agilent38MB | 12:21459876 | missense | T/T | 4.44E-16 | 311 | 99 | 52 | 99 | 0/0 | 0/0 | 0/0 | match | match | match |
| 132306 | Agilent38MB | 12:21475627 | intronic | T/T | 4.44E-16 | 1   | 3  | 28 | 78 | 0/0 | 0/0 | 0/0 | match | match | match |
| 108971 | TruSeqV2    | 12:21477462 | intronic | A/A | 2.22E-15 | 1   | 3  | 55 | 99 | 0/0 | 0/0 | 0/0 | match | match | match |
| 108971 | TruSeqV2    | 12:21487544 | missense | A/A | 5.33E-15 | 26  | 78 | 43 | 99 | 0/0 | 0/0 | 0/0 | match | match | match |
| 115239 | TruSeqV2    | 12:21487544 | missense | G/A | 3.69E-13 | 17  | 99 | 41 | 99 | 0/1 | 0/1 | 0/1 | match | match | match |
| 132306 | Agilent38MB | 12:21487544 | missense | G/A | 2.64E-14 | 170 | 99 | 37 | 99 | 0/1 | 0/1 | 0/1 | match | match | match |
| 163383 | TruSeqV2    | 12:21487544 | missense | A/A | 4.22E-15 | 23  | 66 | 51 | 99 | 0/0 | 0/0 | 0/0 | match | match | match |
| 198564 | Agilent38MB | 12:21487544 | missense | A/A | 1.44E-14 | 295 | 99 | 50 | 99 | 0/0 | 0/0 | 0/0 | match | match | match |
| 108971 | TruSeqV2    | 12:21958221 | missense | C/C | 7.64E-14 | 78  | 99 | 42 | 99 | 0/0 | 0/0 | 0/0 | match | match | match |
| 115239 | TruSeqV2    | 12:21958221 | missense | C/C | 1.75E-14 | 60  | 99 | 41 | 99 | 0/0 | 0/0 | 0/0 | match | match | match |
| 132306 | Agilent38MB | 12:21958221 | missense | C/C | 3.18E-13 | 82  | 99 | 40 | 99 | 0/0 | 0/0 | 0/0 | match | match | match |
| 163383 | TruSeqV2    | 12:21958221 | missense | C/C | 9.77E-15 | 74  | 99 | 53 | 99 | 0/0 | 0/0 | 0/0 | match | match | match |
| 198564 | Agilent38MB | 12:21958221 | missense | C/C | 2.66E-15 | 154 | 99 | 48 | 99 | 0/0 | 0/0 | 0/0 | match | match | match |
| 108971 | TruSeqV2    | 12:22040823 | synon    | G/G | 6.66E-16 | 100 | 99 | 46 | 99 | 0/0 | 0/0 | 0/0 | match | match | match |
| 115239 | TruSeqV2    | 12:22040823 | synon    | G/G | 4.44E-16 | 63  | 99 | 42 | 99 | 0/0 | 0/0 | 0/0 | match | match | match |
| 132306 | Agilent38MB | 12:22040823 | synon    | G/G | 6.66E-16 | 171 | 99 | 49 | 99 | 0/0 | 0/0 | 0/0 | match | match | match |
| 163383 | TruSeqV2    | 12:22040823 | synon    | G/G | 4.44E-16 | 95  | 99 | 44 | 99 | 0/0 | 0/0 | 0/0 | match | match | match |

|        |             |             |          |     |          |     |    |    |    |     |     |     |       |       |       |
|--------|-------------|-------------|----------|-----|----------|-----|----|----|----|-----|-----|-----|-------|-------|-------|
| 198564 | Agilent38MB | 12:22040823 | synon    | G/G | 2.22E-15 | 372 | 99 | 51 | 99 | 0/0 | 0/0 | 0/0 | match | match | match |
| 108971 | TruSeqV2    | 12:22063115 | synon    | G/G | 2.66E-15 | 34  | 99 | 44 | 99 | 1/1 | 1/1 | 1/1 | match | match | match |
| 115239 | TruSeqV2    | 12:22063115 | synon    | G/G | 8.88E-16 | 16  | 48 | 31 | 93 | 1/1 | 1/1 | 1/1 | match | match | match |
| 132306 | Agilent38MB | 12:22063115 | synon    | G/G | 2.66E-15 | 169 | 99 | 32 | 96 | 1/1 | 1/1 | 1/1 | match | match | match |
| 163383 | TruSeqV2    | 12:22063115 | synon    | G/G | 8.88E-16 | 32  | 96 | 50 | 99 | 1/1 | 1/1 | 1/1 | match | match | match |
| 198564 | Agilent38MB | 12:22063115 | synon    | G/G | 2.89E-15 | 208 | 99 | 45 | 99 | 1/1 | 1/1 | 1/1 | match | match | match |
| 108971 | TruSeqV2    | 12:22063889 | synon    | C/C | 6.66E-16 | 49  | 99 | 40 | 99 | 0/0 | 0/0 | 0/0 | match | match | match |
| 115239 | TruSeqV2    | 12:22063889 | synon    | C/C | 1.33E-15 | 25  | 60 | 45 | 99 | 0/0 | 0/0 | 0/0 | match | match | match |
| 132306 | Agilent38MB | 12:22063889 | synon    | C/C | 4.44E-16 | 92  | 99 | 31 | 84 | 0/0 | 0/0 | 0/0 | match | match | match |
| 163383 | TruSeqV2    | 12:22063889 | synon    | C/C | 6.66E-16 | 44  | 99 | 36 | 96 | 0/0 | 0/0 | 0/0 | match | match | match |
| 198564 | Agilent38MB | 12:22063889 | synon    | C/C | 3.55E-15 | 121 | 99 | 52 | 99 | 0/0 | 0/0 | 0/0 | match | match | match |
| 108971 | TruSeqV2    | 12:22068629 | synon    | G/G | 4.44E-16 | 48  | 99 | 32 | 96 | 0/0 | 0/0 | 0/0 | match | match | match |
| 115239 | TruSeqV2    | 12:22068629 | synon    | G/G | 4.66E-15 | 40  | 99 | 16 | 45 | 0/0 | 0/0 | 0/0 | match | match | match |
| 132306 | Agilent38MB | 12:22068629 | synon    | G/G | 6.66E-16 | 196 | 99 | 28 | 81 | 0/0 | 0/0 | 0/0 | match | match | match |
| 163383 | TruSeqV2    | 12:22068629 | synon    | G/G | 2.66E-15 | 32  | 96 | 26 | 72 | 0/0 | 0/0 | 0/0 | match | match | match |
| 198564 | Agilent38MB | 12:22068629 | synon    | G/G | 2.14E-13 | 389 | 99 | 30 | 84 | 0/0 | 0/0 | 0/0 | match | match | match |
| 108971 | TruSeqV2    | 12:22068749 | synon    | C/C | 6.66E-16 | 121 | 99 | 28 | 75 | 0/0 | 0/0 | 0/0 | match | match | match |
| 115239 | TruSeqV2    | 12:22068749 | synon    | C/C | 8.88E-16 | 80  | 99 | 29 | 81 | 0/0 | 0/0 | 0/0 | match | match | match |
| 132306 | Agilent38MB | 12:22068749 | synon    | C/C | 4.44E-16 | 93  | 99 | 38 | 99 | 0/0 | 0/0 | 0/0 | match | match | match |
| 163383 | TruSeqV2    | 12:22068749 | synon    | C/C | 6.66E-16 | 97  | 99 | 25 | 54 | 0/0 | 0/0 | 0/0 | match | match | match |
| 198564 | Agilent38MB | 12:22068749 | synon    | C/C | 4.44E-16 | 159 | 99 | 41 | 99 | 0/0 | 0/0 | 0/0 | match | match | match |
| 108971 | TruSeqV2    | 12:58156510 | 3'UTR    | C/C | 2.22E-16 | 33  | 90 | 53 | 99 | 0/0 | 0/0 | 0/0 | match | match | match |
| 115239 | TruSeqV2    | 12:58156510 | 3'UTR    | C/C | 1.55E-15 | 26  | 69 | 55 | 99 | 0/0 | 0/0 | 0/0 | match | match | match |
| 163383 | TruSeqV2    | 12:58156510 | 3'UTR    | C/C | 2.22E-16 | 27  | 81 | 51 | 99 | 0/0 | 0/0 | 0/0 | match | match | match |
| 198564 | Agilent38MB | 12:58156510 | 3'UTR    | C/C | 3.11E-15 | 1   | 3  | 63 | 99 | 0/0 | 0/0 | 0/0 | match | match | match |
| 108971 | TruSeqV2    | 12:58156848 | 3'UTR    | C/C | 6.24E-14 | 114 | 99 | 46 | 99 | 0/0 | 0/0 | 0/0 | match | match | match |
| 115239 | TruSeqV2    | 12:58156848 | 3'UTR    | C/C | 2.42E-10 | 84  | 99 | 42 | 99 | 0/0 | 0/0 | 0/0 | match | match | match |
| 132306 | Agilent38MB | 12:58156848 | 3'UTR    | C/C | 6.52E-13 | 8   | 24 | 44 | 99 | 0/0 | 0/0 | 0/0 | match | match | match |
| 163383 | TruSeqV2    | 12:58156848 | 3'UTR    | C/C | 8.85E-13 | 91  | 99 | 39 | 99 | 0/0 | 0/0 | 0/0 | match | match | match |
| 198564 | Agilent38MB | 12:58156848 | 3'UTR    | C/C | 8.38E-10 | 12  | 30 | 50 | 99 | 0/0 | 0/0 | 0/0 | match | match | match |
| 108971 | TruSeqV2    | 12:58157000 | synon    | C/C | 2.22E-16 | 91  | 99 | 36 | 99 | 0/0 | 0/0 | 0/0 | match | match | match |
| 115239 | TruSeqV2    | 12:58157000 | synon    | C/C | 2.22E-16 | 57  | 99 | 35 | 93 | 0/0 | 0/0 | 0/0 | match | match | match |
| 132306 | Agilent38MB | 12:58157000 | synon    | C/C | 2.22E-16 | 60  | 99 | 37 | 99 | 0/0 | 0/0 | 0/0 | match | match | match |
| 163383 | TruSeqV2    | 12:58157000 | synon    | C/C | 2.22E-16 | 52  | 99 | 33 | 87 | 0/0 | 0/0 | 0/0 | match | match | match |
| 198564 | Agilent38MB | 12:58157000 | synon    | C/C | 2.22E-16 | 147 | 99 | 49 | 99 | 0/0 | 0/0 | 0/0 | match | match | match |
| 108971 | TruSeqV2    | 12:58158176 | missense | A/A | 2.22E-16 | 167 | 99 | 32 | 78 | 0/0 | 0/0 | 0/0 | match | match | match |
| 115239 | TruSeqV2    | 12:58158176 | missense | A/A | 2.22E-16 | 105 | 99 | 16 | 33 | 0/0 | 0/0 | 0/0 | match | match | match |
| 132306 | Agilent38MB | 12:58158176 | missense | A/A | 4.44E-16 | 69  | 99 | 26 | 63 | 0/0 | 0/0 | 0/0 | match | match | match |

|        |             |              |          |     |          |     |    |    |    |     |     |     |       |       |       |
|--------|-------------|--------------|----------|-----|----------|-----|----|----|----|-----|-----|-----|-------|-------|-------|
| 163383 | TruSeqV2    | 12:58158176  | missense | A/A | 2.22E-16 | 131 | 99 | 32 | 84 | 0/0 | 0/0 | 0/0 | match | match | match |
| 198564 | Agilent38MB | 12:58158176  | missense | A/A | 2.22E-16 | 140 | 99 | 28 | 75 | 0/0 | 0/0 | 0/0 | match | match | match |
| 108971 | TruSeqV2    | 12:58158230  | missense | C/C | 5.11E-15 | 229 | 99 | 41 | 99 | 0/0 | 0/0 | 0/0 | match | match | match |
| 115239 | TruSeqV2    | 12:58158230  | missense | C/C | 1.48E-13 | 134 | 99 | 28 | 75 | 0/0 | 0/0 | 0/0 | match | match | match |
| 132306 | Agilent38MB | 12:58158230  | missense | C/C | 5.55E-15 | 52  | 99 | 21 | 62 | 0/0 | 0/0 | 0/0 | match | match | match |
| 163383 | TruSeqV2    | 12:58158230  | missense | C/C | 2.82E-14 | 156 | 99 | 30 | 78 | 0/0 | 0/0 | 0/0 | match | match | match |
| 198564 | Agilent38MB | 12:58158230  | missense | C/C | 4.89E-13 | 95  | 99 | 30 | 78 | 0/0 | 0/0 | 0/0 | match | match | match |
| 108971 | TruSeqV2    | 12:58158293  | missense | C/C | 1.33E-15 | 159 | 99 | 37 | 99 | 0/0 | 0/0 | 0/0 | match | match | match |
| 115239 | TruSeqV2    | 12:58158293  | missense | C/C | 4.44E-16 | 105 | 99 | 32 | 75 | 0/0 | 0/0 | 0/0 | match | match | match |
| 132306 | Agilent38MB | 12:58158293  | missense | C/C | 2.44E-15 | 45  | 99 | 24 | 71 | 0/0 | 0/0 | 0/0 | match | match | match |
| 163383 | TruSeqV2    | 12:58158293  | missense | C/C | 4.44E-16 | 120 | 99 | 30 | 78 | 0/0 | 0/0 | 0/0 | match | match | match |
| 198564 | Agilent38MB | 12:58158293  | missense | C/C | 4.44E-16 | 101 | 99 | 45 | 99 | 0/0 | 0/0 | 0/0 | match | match | match |
| 108971 | TruSeqV2    | 12:58158558  | synon    | C/C | 2.22E-16 | 169 | 99 | 36 | 99 | 0/0 | 0/0 | 0/0 | match | match | match |
| 115239 | TruSeqV2    | 12:58158558  | synon    | C/C | 2.22E-16 | 115 | 99 | 12 | 36 | 0/0 | 0/0 | 0/0 | match | match | match |
| 132306 | Agilent38MB | 12:58158558  | synon    | C/C | 1.55E-15 | 52  | 99 | 34 | 93 | 0/0 | 0/0 | 0/0 | match | match | match |
| 163383 | TruSeqV2    | 12:58158558  | synon    | C/C | 4.44E-16 | 116 | 99 | 24 | 63 | 0/0 | 0/0 | 0/0 | match | match | match |
| 198564 | Agilent38MB | 12:58158558  | synon    | C/C | 1.55E-15 | 89  | 99 | 29 | 72 | 0/0 | 0/0 | 0/0 | match | match | match |
| 108971 | TruSeqV2    | 12:58159173  | missense | C/C | 8.88E-16 | 27  | 75 | 59 | 99 | 0/0 | 0/0 | 0/0 | match | match | match |
| 115239 | TruSeqV2    | 12:58159173  | missense | C/C | 2.00E-15 | 26  | 75 | 4  | 12 | 0/0 | 0/0 | 0/0 | match | match | match |
| 132306 | Agilent38MB | 12:58159173  | missense | C/C | 1.11E-15 | 24  | 54 | 30 | 75 | 0/0 | 0/0 | 0/0 | match | match | match |
| 163383 | TruSeqV2    | 12:58159173  | missense | C/C | 6.66E-16 | 24  | 72 | 30 | 75 | 0/0 | 0/0 | 0/0 | match | match | match |
| 198564 | Agilent38MB | 12:58159173  | missense | C/C | 1.60E-14 | 30  | 63 | 58 | 99 | 0/0 | 0/0 | 0/0 | match | match | match |
| 108971 | TruSeqV2    | 12:58159210  | synon    | G/G | 4.44E-16 | 33  | 75 | 43 | 99 | 0/0 | 0/0 | 0/0 | match | match | match |
| 115239 | TruSeqV2    | 12:58159210  | synon    | G/G | 4.44E-16 | 26  | 69 | 4  | 12 | 0/0 | 0/0 | 0/0 | match | match | match |
| 132306 | Agilent38MB | 12:58159210  | synon    | G/G | 6.66E-16 | 28  | 63 | 32 | 69 | 0/0 | 0/0 | 0/0 | match | match | match |
| 163383 | TruSeqV2    | 12:58159210  | synon    | G/G | 4.44E-16 | 30  | 84 | 38 | 90 | 0/0 | 0/0 | 0/0 | match | match | match |
| 198564 | Agilent38MB | 12:58159210  | synon    | G/G | 2.00E-15 | 25  | 57 | 60 | 99 | 0/0 | 0/0 | 0/0 | match | match | match |
| 108971 | TruSeqV2    | 12:58164992  | missense | G/G | 3.55E-15 | 131 | 99 | 38 | 99 | 0/0 | 0/0 | 0/0 | match | match | match |
| 115239 | TruSeqV2    | 12:58164992  | missense | G/G | 2.00E-15 | 74  | 99 | 32 | 90 | 0/0 | 0/0 | 0/0 | match | match | match |
| 132306 | Agilent38MB | 12:58164992  | missense | G/G | 1.11E-15 | 89  | 99 | 22 | 63 | 0/0 | 0/0 | 0/0 | match | match | match |
| 163383 | TruSeqV2    | 12:58164992  | missense | G/G | 9.99E-15 | 93  | 99 | 28 | 72 | 0/0 | 0/0 | 0/0 | match | match | match |
| 198564 | Agilent38MB | 12:58164992  | missense | G/G | 5.50E-13 | 172 | 99 | 33 | 99 | 0/0 | 0/0 | 0/0 | match | match | match |
| 108971 | TruSeqV2    | 12:58165790  | missense | T/T | 1.11E-15 | 69  | 99 | 37 | 99 | 0/0 | 0/0 | 0/0 | match | match | match |
| 115239 | TruSeqV2    | 12:58165790  | missense | T/T | 2.00E-15 | 31  | 45 | 21 | 54 | 0/0 | 0/0 | 0/0 | match | match | match |
| 132306 | Agilent38MB | 12:58165790  | missense | T/T | 2.22E-15 | 77  | 99 | 20 | 42 | 0/0 | 0/0 | 0/0 | match | match | match |
| 163383 | TruSeqV2    | 12:58165790  | missense | T/T | 8.88E-16 | 47  | 99 | 34 | 90 | 0/0 | 0/0 | 0/0 | match | match | match |
| 198564 | Agilent38MB | 12:58165790  | missense | T/T | 8.88E-16 | 156 | 99 | 40 | 99 | 0/0 | 0/0 | 0/0 | match | match | match |
| 108971 | TruSeqV2    | 13:103696987 | 3'UTR    | T/T | 4.44E-16 | 215 | 99 | 40 | 99 | 0/0 | 0/0 | 0/0 | match | match | match |

|        |             |              |          |     |          |     |    |    |    |     |     |     |       |       |       |
|--------|-------------|--------------|----------|-----|----------|-----|----|----|----|-----|-----|-----|-------|-------|-------|
| 115239 | TruSeqV2    | 13:103696987 | 3'UTR    | T/T | 4.44E-16 | 190 | 99 | 49 | 99 | 0/0 | 0/0 | 0/0 | match | match | match |
| 132306 | Agilent38MB | 13:103696987 | 3'UTR    | T/T | 2.22E-16 | 2   | 6  | 32 | 87 | 0/0 | 0/0 | 0/0 | match | match | match |
| 163383 | TruSeqV2    | 13:103696987 | 3'UTR    | T/T | 4.44E-16 | 195 | 99 | 38 | 99 | 0/0 | 0/0 | 0/0 | match | match | match |
| 108971 | TruSeqV2    | 13:103697728 | 3'UTR    | G/G | 1.11E-15 | 145 | 99 | 33 | 99 | 0/0 | 0/0 | 0/0 | match | match | match |
| 115239 | TruSeqV2    | 13:103697728 | 3'UTR    | G/G | 1.78E-15 | 76  | 99 | 40 | 99 | 0/0 | 0/0 | 0/0 | match | match | match |
| 163383 | TruSeqV2    | 13:103697728 | 3'UTR    | G/G | 1.11E-15 | 103 | 99 | 45 | 99 | 0/0 | 0/0 | 0/0 | match | match | match |
| 108971 | TruSeqV2    | 13:103698110 | 3'UTR    | G/G | 4.44E-16 | 52  | 99 | 36 | 96 | 0/0 | 0/0 | 0/0 | match | match | match |
| 115239 | TruSeqV2    | 13:103698110 | 3'UTR    | G/G | 4.44E-16 | 48  | 99 | 44 | 99 | 0/0 | 0/0 | 0/0 | match | match | match |
| 163383 | TruSeqV2    | 13:103698110 | 3'UTR    | G/G | 4.44E-16 | 60  | 99 | 39 | 96 | 0/0 | 0/0 | 0/0 | match | match | match |
| 108971 | TruSeqV2    | 13:103698168 | 3'UTR    | C/C | 9.55E-15 | 75  | 99 | 42 | 99 | 1/1 | 1/1 | 1/1 | match | match | match |
| 115239 | TruSeqV2    | 13:103698168 | 3'UTR    | C/A | 2.40E-14 | 62  | 99 | 39 | 99 | 0/1 | 0/1 | 0/1 | match | match | match |
| 163383 | TruSeqV2    | 13:103698168 | 3'UTR    | C/C | 1.55E-15 | 85  | 99 | 29 | 87 | 1/1 | 1/1 | 1/1 | match | match | match |
| 108971 | TruSeqV2    | 13:103698363 | 3'UTR    | G/A | 5.77E-15 | 42  | 99 | 49 | 99 | 0/1 | 0/1 | 0/1 | match | match | match |
| 115239 | TruSeqV2    | 13:103698363 | 3'UTR    | G/A | 5.33E-15 | 26  | 99 | 35 | 99 | 0/1 | 0/1 | 0/1 | match | match | match |
| 132306 | Agilent38MB | 13:103698363 | 3'UTR    | G/A | 7.33E-15 | 7   | 99 | 37 | 99 | 0/1 | 0/1 | 0/1 | match | match | match |
| 163383 | TruSeqV2    | 13:103698363 | 3'UTR    | G/G | 6.00E-15 | 40  | 99 | 39 | 99 | 1/1 | 1/1 | 1/1 | match | match | match |
| 198564 | Agilent38MB | 13:103698363 | 3'UTR    | G/G | 7.99E-15 | 9   | 27 | 58 | 99 | 1/1 | 1/1 | 1/1 | match | match | match |
| 108971 | TruSeqV2    | 13:103705044 | missense | C/C | 1.49E-14 | 109 | 99 | 40 | 99 | 1/1 | 1/1 | 1/1 | match | match | match |
| 115239 | TruSeqV2    | 13:103705044 | missense | C/A | 2.22E-15 | 104 | 99 | 35 | 99 | 0/1 | 0/1 | 0/1 | match | match | match |
| 132306 | Agilent38MB | 13:103705044 | missense | C/A | 3.11E-15 | 65  | 99 | 31 | 99 | 0/1 | 0/1 | 0/1 | match | match | match |
| 163383 | TruSeqV2    | 13:103705044 | missense | C/C | 6.66E-16 | 121 | 99 | 39 | 99 | 1/1 | 1/1 | 1/1 | match | match | match |
| 198564 | Agilent38MB | 13:103705044 | missense | C/C | 1.11E-15 | 149 | 99 | 28 | 84 | 1/1 | 1/1 | 1/1 | match | match | match |
| 108971 | TruSeqV2    | 13:103710684 | synon    | C/C | 4.44E-16 | 69  | 99 | 36 | 99 | 0/0 | 0/0 | 0/0 | match | match | match |
| 115239 | TruSeqV2    | 13:103710684 | synon    | C/C | 2.22E-16 | 41  | 99 | 33 | 80 | 0/0 | 0/0 | 0/0 | match | match | match |
| 132306 | Agilent38MB | 13:103710684 | synon    | C/C | 2.22E-16 | 62  | 99 | 24 | 72 | 0/0 | 0/0 | 0/0 | match | match | match |
| 163383 | TruSeqV2    | 13:103710684 | synon    | C/C | 6.66E-16 | 68  | 99 | 34 | 93 | 0/0 | 0/0 | 0/0 | match | match | match |
| 198564 | Agilent38MB | 13:103710684 | synon    | C/C | 4.44E-16 | 121 | 99 | 43 | 96 | 0/0 | 0/0 | 0/0 | match | match | match |
| 108971 | TruSeqV2    | 13:103719056 | 5'UTR    | T/T | 2.40E-13 | 141 | 99 | 48 | 99 | 0/0 | 0/0 | 0/0 | match | match | match |
| 115239 | TruSeqV2    | 13:103719056 | 5'UTR    | C/C | 2.78E-14 | 62  | 99 | 49 | 16 | 1/1 | 1/1 | 1/1 | match | match | match |
| 163383 | TruSeqV2    | 13:103719056 | 5'UTR    | T/T | 5.77E-15 | 125 | 99 | 37 | 99 | 0/0 | 0/0 | 0/0 | match | match | match |
| 108971 | TruSeqV2    | 13:52507720  | 3'UTR    | C/C | 8.88E-16 | 241 | 99 | 31 | 87 | 0/0 | 0/0 | 0/0 | match | match | match |
| 115239 | TruSeqV2    | 13:52507720  | 3'UTR    | T/C | 1.11E-15 | 166 | 99 | 35 | 99 | 0/1 | 0/1 | 0/1 | match | match | match |
| 163383 | TruSeqV2    | 13:52507720  | 3'UTR    | C/C | 8.88E-16 | 221 | 99 | 29 | 75 | 0/0 | 0/0 | 0/0 | match | match | match |
| 108971 | TruSeqV2    | 13:52513266  | missense | T/T | 2.73E-14 | 160 | 99 | 48 | 99 | 0/0 | 0/0 | 0/0 | match | match | match |
| 115239 | TruSeqV2    | 13:52513266  | missense | T/T | 6.66E-16 | 116 | 99 | 27 | 75 | 0/0 | 0/0 | 0/0 | match | match | match |
| 132306 | Agilent38MB | 13:52513266  | missense | T/T | 4.00E-15 | 127 | 99 | 34 | 90 | 0/0 | 0/0 | 0/0 | match | match | match |
| 163383 | TruSeqV2    | 13:52513266  | missense | T/T | 3.77E-15 | 146 | 99 | 43 | 99 | 0/0 | 0/0 | 0/0 | match | match | match |
| 198564 | Agilent38MB | 13:52513266  | missense | T/T | 2.35E-14 | 230 | 99 | 44 | 99 | 0/0 | 0/0 | 0/0 | match | match | match |

|        |             |             |          |     |          |     |    |    |    |     |     |     |       |       |       |
|--------|-------------|-------------|----------|-----|----------|-----|----|----|----|-----|-----|-----|-------|-------|-------|
| 108971 | TruSeqV2    | 13:52515354 | missense | G/A | 2.22E-16 | 182 | 99 | 34 | 99 | 0/1 | 0/1 | 0/1 | match | match | match |
| 115239 | TruSeqV2    | 13:52515354 | missense | G/G | 1.33E-15 | 115 | 99 | 36 | 99 | 1/1 | 1/1 | 1/1 | match | match | match |
| 132306 | Agilent38MB | 13:52515354 | missense | A/A | 6.66E-16 | 180 | 99 | 22 | 60 | 0/0 | 0/0 | 0/0 | match | match | match |
| 163383 | TruSeqV2    | 13:52515354 | missense | G/A | 2.22E-16 | 179 | 99 | 38 | 99 | 0/1 | 0/1 | 0/1 | match | match | match |
| 198564 | Agilent38MB | 13:52515354 | missense | G/A | 6.66E-16 | 234 | 99 | 36 | 99 | 0/1 | 0/1 | 0/1 | match | match | match |
| 108971 | TruSeqV2    | 13:52520507 | synon    | C/C | 1.11E-15 | 184 | 99 | 31 | 92 | 0/0 | 0/0 | 0/0 | match | match | match |
| 115239 | TruSeqV2    | 13:52520507 | synon    | C/C | 4.44E-16 | 123 | 99 | 16 | 42 | 0/0 | 0/0 | 0/0 | match | match | match |
| 132306 | Agilent38MB | 13:52520507 | synon    | C/C | 6.66E-16 | 37  | 99 | 32 | 96 | 0/0 | 0/0 | 0/0 | match | match | match |
| 163383 | TruSeqV2    | 13:52520507 | synon    | C/C | 3.55E-15 | 146 | 99 | 30 | 81 | 0/0 | 0/0 | 0/0 | match | match | match |
| 198564 | Agilent38MB | 13:52520507 | synon    | C/C | 1.11E-15 | 59  | 99 | 45 | 99 | 0/0 | 0/0 | 0/0 | match | match | match |
| 108971 | TruSeqV2    | 13:52523808 | missense | T/C | 2.66E-15 | 79  | 99 | 65 | 99 | 0/1 | 0/1 | 0/1 | match | match | match |
| 115239 | TruSeqV2    | 13:52523808 | missense | T/T | 8.44E-15 | 62  | 99 | 46 | 51 | 1/1 | 1/1 | 1/1 | match | match | match |
| 132306 | Agilent38MB | 13:52523808 | missense | C/C | 2.22E-15 | 65  | 99 | 32 | 87 | 0/0 | 0/0 | 0/0 | match | match | match |
| 163383 | TruSeqV2    | 13:52523808 | missense | T/C | 1.33E-15 | 76  | 99 | 41 | 99 | 0/1 | 0/1 | 0/1 | match | match | match |
| 198564 | Agilent38MB | 13:52523808 | missense | T/C | 4.44E-16 | 124 | 99 | 47 | 99 | 0/1 | 0/1 | 0/1 | match | match | match |
| 108971 | TruSeqV2    | 13:52524488 | missense | T/C | 1.55E-15 | 324 | 99 | 30 | 99 | 0/1 | 0/1 | 0/1 | match | match | match |
| 115239 | TruSeqV2    | 13:52524488 | missense | C/C | 2.66E-15 | 221 | 99 | 36 | 99 | 1/1 | 1/1 | 1/1 | match | match | match |
| 132306 | Agilent38MB | 13:52524488 | missense | T/T | 1.55E-15 | 136 | 99 | 42 | 99 | 0/0 | 0/0 | 0/0 | match | match | match |
| 163383 | TruSeqV2    | 13:52524488 | missense | T/C | 4.44E-16 | 243 | 99 | 37 | 99 | 0/1 | 0/1 | 0/1 | match | match | match |
| 198564 | Agilent38MB | 13:52524488 | missense | T/C | 8.88E-16 | 204 | 99 | 39 | 99 | 0/1 | 0/1 | 0/1 | match | match | match |
| 108971 | TruSeqV2    | 13:52534376 | missense | C/C | 6.66E-16 | 262 | 99 | 46 | 99 | 0/0 | 0/0 | 0/0 | match | match | match |
| 115239 | TruSeqV2    | 13:52534376 | missense | C/C | 4.44E-16 | 187 | 99 | 18 | 36 | 0/0 | 0/0 | 0/0 | match | match | match |
| 132306 | Agilent38MB | 13:52534376 | missense | C/C | 3.11E-15 | 97  | 99 | 27 | 66 | 0/0 | 0/0 | 0/0 | match | match | match |
| 163383 | TruSeqV2    | 13:52534376 | missense | C/C | 2.44E-15 | 248 | 99 | 32 | 81 | 0/0 | 0/0 | 0/0 | match | match | match |
| 198564 | Agilent38MB | 13:52534376 | missense | C/C | 2.22E-16 | 156 | 99 | 46 | 99 | 0/0 | 0/0 | 0/0 | match | match | match |
| 108971 | TruSeqV2    | 13:52544805 | missense | C/C | 8.88E-16 | 57  | 99 | 46 | 99 | 0/0 | 0/0 | 0/0 | match | match | match |
| 115239 | TruSeqV2    | 13:52544805 | missense | C/C | 6.66E-16 | 27  | 72 | 34 | 87 | 0/0 | 0/0 | 0/0 | match | match | match |
| 132306 | Agilent38MB | 13:52544805 | missense | C/C | 1.33E-15 | 133 | 99 | 28 | 75 | 0/0 | 0/0 | 0/0 | match | match | match |
| 163383 | TruSeqV2    | 13:52544805 | missense | C/C | 1.11E-15 | 35  | 81 | 45 | 99 | 0/0 | 0/0 | 0/0 | match | match | match |
| 198564 | Agilent38MB | 13:52544805 | missense | G/C | 2.24E-12 | 205 | 99 | 36 | 99 | 0/1 | 0/1 | 0/1 | match | match | match |
| 108971 | TruSeqV2    | 13:52548140 | missense | C/A | 4.21E-11 | 132 | 99 | 59 | 99 | 0/1 | 0/1 | 0/1 | match | match | match |
| 115239 | TruSeqV2    | 13:52548140 | missense | A/A | 1.55E-15 | 85  | 99 | 47 | 99 | 0/0 | 0/0 | 0/0 | match | match | match |
| 132306 | Agilent38MB | 13:52548140 | missense | A/A | 1.11E-15 | 116 | 99 | 33 | 90 | 0/0 | 0/0 | 0/0 | match | match | match |
| 163383 | TruSeqV2    | 13:52548140 | missense | A/A | 1.33E-15 | 92  | 99 | 33 | 78 | 0/0 | 0/0 | 0/0 | match | match | match |
| 198564 | Agilent38MB | 13:52548140 | missense | C/A | 1.45E-13 | 229 | 99 | 52 | 99 | 0/1 | 0/1 | 0/1 | match | match | match |
| 108971 | TruSeqV2    | 13:52585548 | 5'UTR    | T/T | 1.42E-14 | 201 | 99 | 38 | 99 | 1/1 | 1/1 | 1/1 | match | match | match |
| 115239 | TruSeqV2    | 13:52585548 | 5'UTR    | T/T | 9.33E-15 | 144 | 99 | 12 | 36 | 1/1 | 1/1 | 1/1 | match | match | match |
| 132306 | Agilent38MB | 13:52585548 | 5'UTR    | T/G | 1.99E-13 | 10  | 55 | 34 | 99 | 0/1 | 0/1 | 0/1 | match | match | match |

|        |             |             |           |     |          |     |    |    |    |     |     |     |       |       |       |
|--------|-------------|-------------|-----------|-----|----------|-----|----|----|----|-----|-----|-----|-------|-------|-------|
| 163383 | TruSeqV2    | 13:52585548 | 5'UTR     | T/G | 6.66E-16 | 125 | 99 | 45 | 99 | 0/1 | 0/1 | 0/1 | match | match | match |
| 198564 | Agilent38MB | 13:52585548 | 5'UTR     | T/T | 3.15E-13 | 9   | 27 | 39 | 99 | 1/1 | 1/1 | 1/1 | match | match | match |
| 108971 | TruSeqV2    | 13:95672265 | 3'UTR     | T/T | 4.44E-16 | 91  | 99 | 43 | 99 | 1/1 | 1/1 | 1/1 | match | match | match |
| 115239 | TruSeqV2    | 13:95672265 | 3'UTR     | T/T | 2.22E-15 | 65  | 99 | 36 | 99 | 1/1 | 1/1 | 1/1 | match | match | match |
| 163383 | TruSeqV2    | 13:95672265 | 3'UTR     | T/T | 6.66E-16 | 86  | 99 | 51 | 99 | 1/1 | 1/1 | 1/1 | match | match | match |
| 108971 | TruSeqV2    | 13:95672478 | 3'UTR     | A/A | 1.27E-14 | 140 | 99 | 57 | 99 | 0/0 | 0/0 | 0/0 | match | match | match |
| 115239 | TruSeqV2    | 13:95672478 | 3'UTR     | A/A | 2.22E-15 | 81  | 99 | 48 | 99 | 0/0 | 0/0 | 0/0 | match | match | match |
| 163383 | TruSeqV2    | 13:95672478 | 3'UTR     | A/A | 3.11E-15 | 137 | 99 | 50 | 99 | 0/0 | 0/0 | 0/0 | match | match | match |
| 108971 | TruSeqV2    | 13:95672547 | 3'UTR     | A/A | 6.66E-16 | 118 | 99 | 61 | 99 | 0/0 | 0/0 | 0/0 | match | match | match |
| 115239 | TruSeqV2    | 13:95672547 | 3'UTR     | A/A | 4.44E-16 | 76  | 99 | 46 | 99 | 0/0 | 0/0 | 0/0 | match | match | match |
| 163383 | TruSeqV2    | 13:95672547 | 3'UTR     | A/A | 8.88E-16 | 113 | 99 | 36 | 81 | 0/0 | 0/0 | 0/0 | match | match | match |
| 108971 | TruSeqV2    | 13:95672950 | 3'UTR     | G/A | 4.88E-15 | 155 | 99 | 53 | 99 | 0/1 | 0/1 | 0/1 | match | match | match |
| 115239 | TruSeqV2    | 13:95672950 | 3'UTR     | A/A | 6.66E-16 | 133 | 99 | 58 | 99 | 0/0 | 0/0 | 0/0 | match | match | match |
| 163383 | TruSeqV2    | 13:95672950 | 3'UTR     | G/G | 2.44E-15 | 130 | 99 | 42 | 99 | 1/1 | 1/1 | 1/1 | match | match | match |
| 108971 | TruSeqV2    | 13:95673135 | 3'UTR     | T/C | 6.66E-16 | 135 | 99 | 42 | 99 | 0/1 | 0/1 | 0/1 | match | match | match |
| 115239 | TruSeqV2    | 13:95673135 | 3'UTR     | C/C | 9.55E-15 | 87  | 99 | 52 | 26 | 0/0 | 0/0 | 0/0 | match | match | match |
| 163383 | TruSeqV2    | 13:95673135 | 3'UTR     | T/T | 5.33E-15 | 120 | 99 | 36 | 99 | 1/1 | 1/1 | 1/1 | match | match | match |
| 108971 | TruSeqV2    | 13:95673518 | 3'UTR     | T/C | 6.66E-16 | 67  | 99 | 39 | 99 | 0/1 | 0/1 | 0/1 | match | match | match |
| 115239 | TruSeqV2    | 13:95673518 | 3'UTR     | C/C | 1.02E-14 | 51  | 99 | 49 | 99 | 1/1 | 1/1 | 1/1 | match | match | match |
| 163383 | TruSeqV2    | 13:95673518 | 3'UTR     | T/T | 4.44E-15 | 58  | 99 | 32 | 84 | 0/0 | 0/0 | 0/0 | match | match | match |
| 108971 | TruSeqV2    | 13:95673791 | 3'UTR     | C/A | 1.63E-13 | 42  | 99 | 36 | 99 | 0/1 | 0/1 | 0/1 | match | match | match |
| 115239 | TruSeqV2    | 13:95673791 | 3'UTR     | C/C | 4.00E-15 | 27  | 81 | 47 | 99 | 1/1 | 1/1 | 1/1 | match | match | match |
| 132306 | Agilent38MB | 13:95673791 | 3'UTR     | C/C | 9.04E-14 | 21  | 63 | 31 | 92 | 1/1 | 1/1 | 1/1 | match | match | match |
| 163383 | TruSeqV2    | 13:95673791 | 3'UTR     | A/A | 1.11E-15 | 26  | 66 | 45 | 99 | 0/0 | 0/0 | 0/0 | match | match | match |
| 198564 | Agilent38MB | 13:95673791 | 3'UTR     | A/A | 1.60E-14 | 36  | 99 | 53 | 99 | 0/0 | 0/0 | 0/0 | match | match | match |
| 108971 | TruSeqV2    | 13:95714976 | stop/miss | T/T | 4.44E-16 | 25  | 75 | 31 | 93 | 1/1 | 1/1 | 1/1 | match | match | match |
| 115239 | TruSeqV2    | 13:95714976 | stop/miss | T/T | 4.44E-16 | 15  | 45 | 44 | 99 | 1/1 | 1/1 | 1/1 | match | match | match |
| 132306 | Agilent38MB | 13:95714976 | stop/miss | T/T | 2.22E-16 | 105 | 99 | 26 | 78 | 1/1 | 1/1 | 1/1 | match | match | match |
| 163383 | TruSeqV2    | 13:95714976 | stop/miss | T/T | 4.44E-16 | 17  | 51 | 32 | 96 | 1/1 | 1/1 | 1/1 | match | match | match |
| 198564 | Agilent38MB | 13:95714976 | stop/miss | T/T | 3.82E-14 | 215 | 99 | 34 | 99 | 1/1 | 1/1 | 1/1 | match | match | match |
| 108971 | TruSeqV2    | 13:95726541 | synon     | G/G | 2.33E-14 | 154 | 99 | 41 | 99 | 1/1 | 1/1 | 1/1 | match | match | match |
| 115239 | TruSeqV2    | 13:95726541 | synon     | G/G | 4.44E-16 | 104 | 99 | 38 | 99 | 1/1 | 1/1 | 1/1 | match | match | match |
| 132306 | Agilent38MB | 13:95726541 | synon     | G/G | 1.78E-15 | 111 | 99 | 35 | 99 | 1/1 | 1/1 | 1/1 | match | match | match |
| 163383 | TruSeqV2    | 13:95726541 | synon     | G/G | 1.33E-15 | 128 | 99 | 36 | 99 | 1/1 | 1/1 | 1/1 | match | match | match |
| 198564 | Agilent38MB | 13:95726541 | synon     | G/G | 1.78E-15 | 217 | 99 | 49 | 99 | 1/1 | 1/1 | 1/1 | match | match | match |
| 108971 | TruSeqV2    | 13:95727780 | synon     | C/C | 2.22E-16 | 145 | 99 | 47 | 99 | 1/1 | 1/1 | 1/1 | match | match | match |
| 115239 | TruSeqV2    | 13:95727780 | synon     | C/C | 2.22E-16 | 89  | 99 | 37 | 99 | 1/1 | 1/1 | 1/1 | match | match | match |
| 132306 | Agilent38MB | 13:95727780 | synon     | C/C | 2.22E-16 | 38  | 99 | 36 | 99 | 1/1 | 1/1 | 1/1 | match | match | match |



|        |             |             |          |     |          |     |    |    |    |     |     |     |       |       |       |
|--------|-------------|-------------|----------|-----|----------|-----|----|----|----|-----|-----|-----|-------|-------|-------|
| 163383 | TruSeqV2    | 13:95727780 | synon    | C/C | 2.22E-16 | 112 | 99 | 27 | 81 | 1/1 | 1/1 | 1/1 | match | match | match |
| 198564 | Agilent38MB | 13:95727780 | synon    | C/C | 4.44E-16 | 56  | 99 | 41 | 99 | 1/1 | 1/1 | 1/1 | match | match | match |
| 108971 | TruSeqV2    | 13:95815415 | missense | C/C | 7.11E-15 | 133 | 99 | 53 | 99 | 0/0 | 0/0 | 0/0 | match | match | match |
| 115239 | TruSeqV2    | 13:95815415 | missense | C/C | 8.88E-16 | 81  | 99 | 47 | 99 | 0/0 | 0/0 | 0/0 | match | match | match |
| 132306 | Agilent38MB | 13:95815415 | missense | C/C | 2.44E-15 | 265 | 99 | 36 | 99 | 0/0 | 0/0 | 0/0 | match | match | match |
| 163383 | TruSeqV2    | 13:95815415 | missense | C/C | 3.11E-15 | 114 | 99 | 38 | 99 | 0/0 | 0/0 | 0/0 | match | match | match |
| 198564 | Agilent38MB | 13:95815415 | missense | C/C | 6.66E-16 | 442 | 99 | 40 | 99 | 0/0 | 0/0 | 0/0 | match | match | match |
| 108971 | TruSeqV2    | 13:95818554 | stop     | T/T | 4.44E-16 | 74  | 99 | 35 | 99 | 0/0 | 0/0 | 0/0 | match | match | match |
| 115239 | TruSeqV2    | 13:95818554 | stop     | T/T | 4.44E-16 | 74  | 99 | 35 | 99 | 0/0 | 0/0 | 0/0 | match | match | match |
| 132306 | Agilent38MB | 13:95818554 | stop     | T/T | 6.66E-16 | 74  | 99 | 35 | 99 | 0/0 | 0/0 | 0/0 | match | match | match |
| 163383 | TruSeqV2    | 13:95818554 | stop     | T/T | 4.44E-16 | 74  | 99 | 35 | 99 | 0/0 | 0/0 | 0/0 | match | match | match |
| 198564 | Agilent38MB | 13:95818554 | stop     | T/T | 8.88E-16 | 74  | 99 | 35 | 99 | 0/0 | 0/0 | 0/0 | match | match | match |
| 108971 | TruSeqV2    | 13:95858978 | synon    | T/T | 4.88E-15 | 158 | 99 | 51 | 99 | 0/0 | 0/0 | 0/0 | match | match | match |
| 115239 | TruSeqV2    | 13:95858978 | synon    | T/C | 4.88E-15 | 120 | 99 | 37 | 99 | 0/1 | 0/1 | 0/1 | match | match | match |
| 132306 | Agilent38MB | 13:95858978 | synon    | C/C | 6.66E-16 | 49  | 99 | 33 | 97 | 1/1 | 1/1 | 1/1 | match | match | match |
| 163383 | TruSeqV2    | 13:95858978 | synon    | C/C | 1.33E-15 | 146 | 99 | 46 | 99 | 1/1 | 1/1 | 1/1 | match | match | match |
| 198564 | Agilent38MB | 13:95858978 | synon    | C/C | 2.78E-14 | 71  | 99 | 36 | 99 | 1/1 | 1/1 | 1/1 | match | match | match |
| 108971 | TruSeqV2    | 13:95858996 | synon    | T/T | 6.66E-16 | 134 | 99 | 49 | 99 | 0/0 | 0/0 | 0/0 | match | match | match |
| 115239 | TruSeqV2    | 13:95858996 | synon    | T/C | 4.44E-16 | 95  | 99 | 35 | 99 | 0/1 | 0/1 | 0/1 | match | match | match |
| 132306 | Agilent38MB | 13:95858996 | synon    | C/C | 4.22E-15 | 47  | 99 | 33 | 99 | 1/1 | 1/1 | 1/1 | match | match | match |
| 163383 | TruSeqV2    | 13:95858996 | synon    | C/C | 3.55E-15 | 122 | 99 | 44 | 99 | 1/1 | 1/1 | 1/1 | match | match | match |
| 198564 | Agilent38MB | 13:95858996 | synon    | C/C | 7.11E-15 | 81  | 99 | 40 | 99 | 1/1 | 1/1 | 1/1 | match | match | match |
| 108971 | TruSeqV2    | 13:95859035 | missense | C/C | 8.88E-16 | 96  | 99 | 43 | 99 | 0/0 | 0/0 | 0/0 | match | match | match |
| 115239 | TruSeqV2    | 13:95859035 | missense | C/C | 8.88E-16 | 62  | 99 | 35 | 96 | 0/0 | 0/0 | 0/0 | match | match | match |
| 132306 | Agilent38MB | 13:95859035 | missense | C/A | 2.50E-13 | 45  | 99 | 38 | 99 | 0/1 | 0/1 | 0/1 | match | match | match |
| 163383 | TruSeqV2    | 13:95859035 | missense | C/C | 5.11E-15 | 78  | 99 | 37 | 48 | 0/0 | 0/0 | 0/0 | match | match | match |
| 198564 | Agilent38MB | 13:95859035 | missense | C/C | 3.11E-15 | 91  | 99 | 49 | 99 | 0/0 | 0/0 | 0/0 | match | match | match |
| 108971 | TruSeqV2    | 13:95886884 | missense | A/A | 4.44E-16 | 125 | 99 | 44 | 99 | 0/0 | 0/0 | 0/0 | match | match | match |
| 115239 | TruSeqV2    | 13:95886884 | missense | A/A | 6.66E-16 | 72  | 99 | 36 | 96 | 0/0 | 0/0 | 0/0 | match | match | match |
| 132306 | Agilent38MB | 13:95886884 | missense | A/A | 4.44E-16 | 131 | 99 | 33 | 90 | 0/0 | 0/0 | 0/0 | match | match | match |
| 163383 | TruSeqV2    | 13:95886884 | missense | A/A | 2.44E-15 | 110 | 99 | 41 | 99 | 0/0 | 0/0 | 0/0 | match | match | match |
| 198564 | Agilent38MB | 13:95886884 | missense | A/A | 9.10E-15 | 301 | 99 | 37 | 99 | 0/0 | 0/0 | 0/0 | match | match | match |
| 108971 | TruSeqV2    | 13:99338531 | synon    | C/C | 2.22E-16 | 120 | 99 | 35 | 87 | 0/0 | 0/0 | 0/0 | match | match | match |
| 115239 | TruSeqV2    | 13:99338531 | synon    | C/C | 4.44E-16 | 86  | 99 | 29 | 43 | 0/0 | 0/0 | 0/0 | match | match | match |
| 132306 | Agilent38MB | 13:99338531 | synon    | C/C | 4.44E-16 | 12  | 36 | 23 | 63 | 0/0 | 0/0 | 0/0 | match | match | match |
| 163383 | TruSeqV2    | 13:99338531 | synon    | C/C | 8.88E-16 | 92  | 99 | 31 | 81 | 0/0 | 0/0 | 0/0 | match | match | match |
| 198564 | Agilent38MB | 13:99338531 | synon    | C/C | 1.11E-15 | 45  | 99 | 29 | 81 | 0/0 | 0/0 | 0/0 | match | match | match |
| 108971 | TruSeqV2    | 13:99339905 | missense | G/G | 4.66E-15 | 181 | 99 | 24 | 54 | 0/0 | 0/0 | 0/0 | match | match | match |

|        |             |             |          |     |          |     |    |    |    |     |     |     |       |       |       |
|--------|-------------|-------------|----------|-----|----------|-----|----|----|----|-----|-----|-----|-------|-------|-------|
| 115239 | TruSeqV2    | 13:99339905 | missense | G/G | 8.88E-16 | 152 | 99 | 40 | 99 | 0/0 | 0/0 | 0/0 | match | match | match |
| 132306 | Agilent38MB | 13:99339905 | missense | G/G | 6.66E-16 | 64  | 99 | 39 | 99 | 0/0 | 0/0 | 0/0 | match | match | match |
| 163383 | TruSeqV2    | 13:99339905 | missense | G/G | 2.66E-15 | 190 | 99 | 56 | 99 | 0/0 | 0/0 | 0/0 | match | match | match |
| 198564 | Agilent38MB | 13:99339905 | missense | G/G | 8.97E-14 | 105 | 99 | 48 | 99 | 0/0 | 0/0 | 0/0 | match | match | match |
| 108971 | TruSeqV2    | 13:99340576 | missense | G/G | 1.33E-15 | 116 | 99 | 49 | 99 | 0/0 | 0/0 | 0/0 | match | match | match |
| 115239 | TruSeqV2    | 13:99340576 | missense | G/G | 1.33E-15 | 89  | 99 | 45 | 99 | 0/0 | 0/0 | 0/0 | match | match | match |
| 132306 | Agilent38MB | 13:99340576 | missense | G/G | 3.86E-14 | 115 | 99 | 40 | 99 | 0/0 | 0/0 | 0/0 | match | match | match |
| 163383 | TruSeqV2    | 13:99340576 | missense | G/G | 1.33E-15 | 122 | 99 | 48 | 99 | 0/0 | 0/0 | 0/0 | match | match | match |
| 198564 | Agilent38MB | 13:99340576 | missense | G/G | 2.22E-16 | 215 | 99 | 46 | 99 | 0/0 | 0/0 | 0/0 | match | match | match |
| 108971 | TruSeqV2    | 13:99340771 | synon    | G/G | 4.44E-16 | 76  | 99 | 41 | 99 | 0/0 | 0/0 | 0/0 | match | match | match |
| 115239 | TruSeqV2    | 13:99340771 | synon    | G/G | 4.44E-16 | 55  | 99 | 42 | 39 | 0/0 | 0/0 | 0/0 | match | match | match |
| 132306 | Agilent38MB | 13:99340771 | synon    | G/G | 2.22E-16 | 125 | 99 | 36 | 99 | 0/0 | 0/0 | 0/0 | match | match | match |
| 163383 | TruSeqV2    | 13:99340771 | synon    | G/G | 4.44E-16 | 66  | 99 | 42 | 99 | 0/0 | 0/0 | 0/0 | match | match | match |
| 198564 | Agilent38MB | 13:99340771 | synon    | G/G | 8.88E-16 | 201 | 99 | 61 | 99 | 0/0 | 0/0 | 0/0 | match | match | match |
| 108971 | TruSeqV2    | 13:99354754 | synon    | T/T | 1.55E-15 | 100 | 99 | 50 | 99 | 0/0 | 0/0 | 0/0 | match | match | match |
| 115239 | TruSeqV2    | 13:99354754 | synon    | T/T | 8.88E-16 | 59  | 99 | 54 | 99 | 0/0 | 0/0 | 0/0 | match | match | match |
| 132306 | Agilent38MB | 13:99354754 | synon    | T/T | 4.44E-16 | 86  | 99 | 49 | 99 | 0/0 | 0/0 | 0/0 | match | match | match |
| 163383 | TruSeqV2    | 13:99354754 | synon    | T/T | 1.11E-15 | 74  | 99 | 51 | 99 | 0/0 | 0/0 | 0/0 | match | match | match |
| 198564 | Agilent38MB | 13:99354754 | synon    | T/T | 2.22E-15 | 183 | 99 | 45 | 99 | 0/0 | 0/0 | 0/0 | match | match | match |
| 108971 | TruSeqV2    | 13:99356584 | missense | G/G | 2.22E-16 | 299 | 99 | 45 | 99 | 0/0 | 0/0 | 0/0 | match | match | match |
| 115239 | TruSeqV2    | 13:99356584 | missense | G/G | 2.22E-16 | 187 | 99 | 29 | 72 | 0/0 | 0/0 | 0/0 | match | match | match |
| 132306 | Agilent38MB | 13:99356584 | missense | G/G | 6.66E-16 | 131 | 99 | 39 | 99 | 0/0 | 0/0 | 0/0 | match | match | match |
| 163383 | TruSeqV2    | 13:99356584 | missense | G/G | 4.44E-16 | 251 | 99 | 46 | 99 | 0/0 | 0/0 | 0/0 | match | match | match |
| 198564 | Agilent38MB | 13:99356584 | missense | G/G | 1.33E-15 | 317 | 99 | 37 | 99 | 0/0 | 0/0 | 0/0 | match | match | match |
| 108971 | TruSeqV2    | 13:99356607 | missense | G/G | 4.44E-16 | 297 | 99 | 37 | 90 | 0/0 | 0/0 | 0/0 | match | match | match |
| 115239 | TruSeqV2    | 13:99356607 | missense | G/G | 1.11E-15 | 198 | 99 | 27 | 66 | 0/0 | 0/0 | 0/0 | match | match | match |
| 132306 | Agilent38MB | 13:99356607 | missense | T/G | 3.60E-14 | 107 | 99 | 44 | 99 | 0/1 | 0/1 | 0/1 | match | match | match |
| 163383 | TruSeqV2    | 13:99356607 | missense | G/G | 0        | 254 | 99 | 43 | 99 | 0/0 | 0/0 | 0/0 | match | match | match |
| 198564 | Agilent38MB | 13:99356607 | missense | G/G | 4.44E-16 | 289 | 99 | 45 | 99 | 0/0 | 0/0 | 0/0 | match | match | match |
| 108971 | TruSeqV2    | 13:99356611 | missense | C/C | 4.22E-15 | 294 | 99 | 35 | 90 | 0/0 | 0/0 | 0/0 | match | match | match |
| 115239 | TruSeqV2    | 13:99356611 | missense | C/C | 6.66E-16 | 197 | 99 | 26 | 63 | 0/0 | 0/0 | 0/0 | match | match | match |
| 132306 | Agilent38MB | 13:99356611 | missense | C/C | 6.66E-16 | 124 | 99 | 44 | 99 | 0/0 | 0/0 | 0/0 | match | match | match |
| 163383 | TruSeqV2    | 13:99356611 | missense | C/C | 1.55E-15 | 252 | 99 | 42 | 99 | 0/0 | 0/0 | 0/0 | match | match | match |
| 198564 | Agilent38MB | 13:99356611 | missense | C/C | 2.89E-15 | 297 | 99 | 44 | 99 | 0/0 | 0/0 | 0/0 | match | match | match |
| 108971 | TruSeqV2    | 13:99356612 | synon    | G/G | 2.22E-15 | 284 | 99 | 32 | 96 | 1/1 | 1/1 | 1/1 | match | match | match |
| 115239 | TruSeqV2    | 13:99356612 | synon    | G/G | 3.33E-15 | 188 | 99 | 25 | 75 | 1/1 | 1/1 | 1/1 | match | match | match |
| 132306 | Agilent38MB | 13:99356612 | synon    | G/G | 7.55E-15 | 115 | 99 | 41 | 99 | 1/1 | 1/1 | 1/1 | match | match | match |
| 163383 | TruSeqV2    | 13:99356612 | synon    | G/A | 9.77E-13 | 245 | 99 | 42 | 99 | 0/1 | 0/1 | 0/1 | match | match | match |

|        |             |             |          |     |          |     |    |    |    |     |     |     |       |       |       |
|--------|-------------|-------------|----------|-----|----------|-----|----|----|----|-----|-----|-----|-------|-------|-------|
| 198564 | Agilent38MB | 13:99356612 | synon    | G/A | 1.33E-14 | 283 | 99 | 41 | 99 | 0/1 | 0/1 | 0/1 | match | match | match |
| 108971 | TruSeqV2    | 13:99356637 | fs       | -/- | 1.78E-15 | 248 | 99 | 34 | 87 | 0/0 | 0/0 | 0/0 | match | match | match |
| 115239 | TruSeqV2    | 13:99356637 | fs       | -/- | 6.66E-16 | 248 | 99 | 34 | 87 | 0/0 | 0/0 | 0/0 | match | match | match |
| 132306 | Agilent38MB | 13:99356637 | fs       | -/- | 1.55E-15 | 248 | 99 | 34 | 87 | 0/0 | 0/0 | 0/0 | match | match | match |
| 163383 | TruSeqV2    | 13:99356637 | fs       | -/- | 6.66E-16 | 248 | 99 | 34 | 87 | 0/0 | 0/0 | 0/0 | match | match | match |
| 198564 | Agilent38MB | 13:99356637 | fs       | -/- | 2.22E-15 | 248 | 99 | 34 | 87 | 0/0 | 0/0 | 0/0 | match | match | match |
| 108971 | TruSeqV2    | 13:99358401 | missense | C/C | 2.48E-13 | 93  | 99 | 40 | 99 | 0/0 | 0/0 | 0/0 | match | match | match |
| 115239 | TruSeqV2    | 13:99358401 | missense | G/C | 5.48E-13 | 71  | 99 | 45 | 99 | 0/1 | 0/1 | 0/1 | match | match | match |
| 132306 | Agilent38MB | 13:99358401 | missense | C/C | 1.75E-14 | 98  | 99 | 32 | 90 | 0/0 | 0/0 | 0/0 | match | match | match |
| 163383 | TruSeqV2    | 13:99358401 | missense | C/C | 9.46E-14 | 80  | 99 | 35 | 84 | 0/0 | 0/0 | 0/0 | match | match | match |
| 198564 | Agilent38MB | 13:99358401 | missense | C/C | 2.83E-12 | 209 | 99 | 33 | 90 | 0/0 | 0/0 | 0/0 | match | match | match |
| 108971 | TruSeqV2    | 13:99358478 | synon    | G/G | 6.66E-16 | 103 | 99 | 44 | 99 | 0/0 | 0/0 | 0/0 | match | match | match |
| 115239 | TruSeqV2    | 13:99358478 | synon    | G/G | 4.44E-16 | 70  | 99 | 40 | 99 | 0/0 | 0/0 | 0/0 | match | match | match |
| 132306 | Agilent38MB | 13:99358478 | synon    | G/G | 6.66E-16 | 66  | 99 | 41 | 99 | 0/0 | 0/0 | 0/0 | match | match | match |
| 163383 | TruSeqV2    | 13:99358478 | synon    | G/G | 4.44E-16 | 101 | 99 | 40 | 99 | 0/0 | 0/0 | 0/0 | match | match | match |
| 198564 | Agilent38MB | 13:99358478 | synon    | G/G | 2.22E-16 | 89  | 99 | 53 | 99 | 0/0 | 0/0 | 0/0 | match | match | match |
| 108971 | TruSeqV2    | 13:99376180 | missense | G/G | 6.22E-15 | 64  | 99 | 34 | 90 | 0/0 | 0/0 | 0/0 | match | match | match |
| 115239 | TruSeqV2    | 13:99376180 | missense | G/G | 1.78E-15 | 52  | 99 | 21 | 51 | 0/0 | 0/0 | 0/0 | match | match | match |
| 132306 | Agilent38MB | 13:99376180 | missense | G/G | 6.66E-16 | 90  | 99 | 30 | 66 | 0/0 | 0/0 | 0/0 | match | match | match |
| 163383 | TruSeqV2    | 13:99376180 | missense | G/G | 2.89E-15 | 51  | 99 | 24 | 60 | 0/0 | 0/0 | 0/0 | match | match | match |
| 198564 | Agilent38MB | 13:99376180 | missense | G/G | 4.88E-15 | 166 | 99 | 37 | 93 | 0/0 | 0/0 | 0/0 | match | match | match |
| 108971 | TruSeqV2    | 13:99376181 | missense | C/C | 3.49E-06 | 66  | 99 | 34 | 90 | 0/0 | 0/0 | 0/0 | match | match | match |
| 115239 | TruSeqV2    | 13:99376181 | missense | C/C | 1.28E-10 | 53  | 99 | 20 | 16 | 0/0 | 0/0 | 0/0 | match | match | match |
| 132306 | Agilent38MB | 13:99376181 | missense | T/C | 6.66E-16 | 88  | 99 | 29 | 99 | 0/1 | 0/1 | 0/1 | match | match | match |
| 163383 | TruSeqV2    | 13:99376181 | missense | C/C | 1.54E-09 | 52  | 99 | 26 | 63 | 0/0 | 0/0 | 0/0 | match | match | match |
| 198564 | Agilent38MB | 13:99376181 | missense | C/C | 1.09E-07 | 163 | 99 | 38 | 99 | 0/0 | 0/0 | 0/0 | match | match | match |
| 108971 | TruSeqV2    | 13:99376201 | synon    | G/G | 2.22E-16 | 73  | 99 | 34 | 93 | 0/0 | 0/0 | 0/0 | match | match | match |
| 115239 | TruSeqV2    | 13:99376201 | synon    | G/G | 6.66E-16 | 60  | 99 | 29 | 84 | 0/0 | 0/0 | 0/0 | match | match | match |
| 132306 | Agilent38MB | 13:99376201 | synon    | G/G | 2.22E-16 | 98  | 99 | 30 | 87 | 0/0 | 0/0 | 0/0 | match | match | match |
| 163383 | TruSeqV2    | 13:99376201 | synon    | G/G | 2.22E-16 | 59  | 99 | 27 | 75 | 0/0 | 0/0 | 0/0 | match | match | match |
| 198564 | Agilent38MB | 13:99376201 | synon    | G/G | 4.44E-16 | 226 | 99 | 42 | 99 | 0/0 | 0/0 | 0/0 | match | match | match |
| 108971 | TruSeqV2    | 13:99376273 | synon    | C/C | 4.44E-16 | 51  | 99 | 30 | 87 | 0/0 | 0/0 | 0/0 | match | match | match |
| 115239 | TruSeqV2    | 13:99376273 | synon    | C/C | 4.44E-16 | 46  | 99 | 42 | 99 | 0/0 | 0/0 | 0/0 | match | match | match |
| 132306 | Agilent38MB | 13:99376273 | synon    | C/C | 2.22E-16 | 251 | 99 | 39 | 99 | 0/0 | 0/0 | 0/0 | match | match | match |
| 163383 | TruSeqV2    | 13:99376273 | synon    | C/C | 2.22E-16 | 59  | 99 | 42 | 99 | 0/0 | 0/0 | 0/0 | match | match | match |
| 198564 | Agilent38MB | 13:99376273 | synon    | C/C | 2.44E-15 | 483 | 99 | 47 | 99 | 0/0 | 0/0 | 0/0 | match | match | match |
| 108971 | TruSeqV2    | 13:99378642 | missense | A/A | 2.22E-16 | 205 | 99 | 37 | 99 | 0/0 | 0/0 | 0/0 | match | match | match |
| 115239 | TruSeqV2    | 13:99378642 | missense | A/A | 4.44E-16 | 129 | 99 | 42 | 99 | 0/0 | 0/0 | 0/0 | match | match | match |

|        |             |              |          |     |          |     |    |    |    |     |     |     |       |       |       |
|--------|-------------|--------------|----------|-----|----------|-----|----|----|----|-----|-----|-----|-------|-------|-------|
| 132306 | Agilent38MB | 13:99378642  | missense | A/A | 2.22E-16 | 71  | 99 | 33 | 93 | 0/0 | 0/0 | 0/0 | match | match | match |
| 163383 | TruSeqV2    | 13:99378642  | missense | A/A | 6.66E-16 | 172 | 99 | 36 | 99 | 0/0 | 0/0 | 0/0 | match | match | match |
| 198564 | Agilent38MB | 13:99378642  | missense | A/A | 1.35E-14 | 137 | 99 | 37 | 99 | 0/0 | 0/0 | 0/0 | match | match | match |
| 108971 | TruSeqV2    | 13:99378664  | missense | C/C | 2.22E-16 | 172 | 99 | 38 | 99 | 0/0 | 0/0 | 0/0 | match | match | match |
| 115239 | TruSeqV2    | 13:99378664  | missense | C/C | 4.44E-16 | 112 | 99 | 40 | 99 | 0/0 | 0/0 | 0/0 | match | match | match |
| 132306 | Agilent38MB | 13:99378664  | missense | C/C | 2.22E-16 | 77  | 99 | 40 | 99 | 0/0 | 0/0 | 0/0 | match | match | match |
| 163383 | TruSeqV2    | 13:99378664  | missense | C/C | 2.22E-16 | 158 | 99 | 38 | 93 | 0/0 | 0/0 | 0/0 | match | match | match |
| 198564 | Agilent38MB | 13:99378664  | missense | C/C | 1.78E-15 | 126 | 99 | 45 | 99 | 0/0 | 0/0 | 0/0 | match | match | match |
| 108971 | TruSeqV2    | 13:99378743  | intronic | C/C | 6.66E-16 | 66  | 99 | 43 | 99 | 0/0 | 0/0 | 0/0 | match | match | match |
| 115239 | TruSeqV2    | 13:99378743  | intronic | C/C | 8.88E-16 | 37  | 90 | 38 | 84 | 0/0 | 0/0 | 0/0 | match | match | match |
| 132306 | Agilent38MB | 13:99378743  | intronic | C/C | 1.33E-15 | 20  | 48 | 26 | 66 | 0/0 | 0/0 | 0/0 | match | match | match |
| 163383 | TruSeqV2    | 13:99378743  | intronic | C/C | 8.88E-16 | 74  | 99 | 36 | 99 | 0/0 | 0/0 | 0/0 | match | match | match |
| 198564 | Agilent38MB | 13:99378743  | intronic | C/C | 2.73E-14 | 22  | 45 | 36 | 90 | 0/0 | 0/0 | 0/0 | match | match | match |
| 115239 | TruSeqV2    | 14:100193559 | 3'UTR    | G/G | 6.66E-16 | 1   | 3  | 14 | 39 | 0/0 | 0/0 | 0/0 | match | match | match |
| 132306 | Agilent38MB | 14:100193559 | 3'UTR    | G/G | 8.88E-16 | 2   | 5  | 30 | 81 | 0/0 | 0/0 | 0/0 | match | match | match |
| 198564 | Agilent38MB | 14:100193559 | 3'UTR    | G/G | 4.44E-16 | 1   | 3  | 33 | 90 | 0/0 | 0/0 | 0/0 | match | match | match |
| 108971 | TruSeqV2    | 14:23242828  | synon    | C/C | 4.44E-16 | 187 | 99 | 32 | 96 | 1/1 | 1/1 | 1/1 | match | match | match |
| 115239 | TruSeqV2    | 14:23242828  | synon    | C/C | 4.44E-16 | 107 | 99 | 34 | 99 | 1/1 | 1/1 | 1/1 | match | match | match |
| 132306 | Agilent38MB | 14:23242828  | synon    | C/C | 2.22E-16 | 76  | 99 | 38 | 99 | 1/1 | 1/1 | 1/1 | match | match | match |
| 163383 | TruSeqV2    | 14:23242828  | synon    | C/C | 4.44E-16 | 134 | 99 | 32 | 96 | 1/1 | 1/1 | 1/1 | match | match | match |
| 198564 | Agilent38MB | 14:23242828  | synon    | T/C | 4.44E-15 | 141 | 99 | 41 | 99 | 0/1 | 0/1 | 0/1 | match | match | match |
| 108971 | TruSeqV2    | 14:23248074  | missense | T/T | 4.44E-16 | 222 | 99 | 45 | 99 | 0/0 | 0/0 | 0/0 | match | match | match |
| 115239 | TruSeqV2    | 14:23248074  | missense | T/T | 2.22E-16 | 199 | 99 | 47 | 99 | 0/0 | 0/0 | 0/0 | match | match | match |
| 132306 | Agilent38MB | 14:23248074  | missense | T/T | 6.66E-16 | 166 | 99 | 34 | 99 | 0/0 | 0/0 | 0/0 | match | match | match |
| 163383 | TruSeqV2    | 14:23248074  | missense | T/T | 4.44E-16 | 177 | 99 | 38 | 99 | 0/0 | 0/0 | 0/0 | match | match | match |
| 198564 | Agilent38MB | 14:23248074  | missense | T/T | 1.55E-15 | 284 | 99 | 38 | 76 | 0/0 | 0/0 | 0/0 | match | match | match |
| 108971 | TruSeqV2    | 14:23248112  | synon    | A/A | 8.88E-16 | 173 | 99 | 41 | 99 | 0/0 | 0/0 | 0/0 | match | match | match |
| 132306 | Agilent38MB | 14:23248112  | synon    | A/A | 1.33E-15 | 95  | 99 | 39 | 99 | 0/0 | 0/0 | 0/0 | match | match | match |
| 163383 | TruSeqV2    | 14:23248112  | synon    | A/A | 6.66E-16 | 144 | 99 | 31 | 78 | 0/0 | 0/0 | 0/0 | match | match | match |
| 198564 | Agilent38MB | 14:23248112  | synon    | A/A | 4.44E-16 | 170 | 99 | 29 | 78 | 0/0 | 0/0 | 0/0 | match | match | match |
| 115239 | TruSeqV2    | 14:23282110  | synon    | A/A | 1.31E-14 | 2   | 3  | 5  | 12 | 0/0 | 0/0 | 0/0 | match | match | match |
| 132306 | Agilent38MB | 14:23282110  | synon    | G/A | 2.89E-15 | 11  | 75 | 18 | 99 | 0/1 | 0/1 | 0/1 | match | match | match |
| 163383 | TruSeqV2    | 14:23282110  | synon    | G/G | 1.05E-13 | 2   | 6  | 32 | 96 | 1/1 | 1/1 | 1/1 | match | match | match |
| 198564 | Agilent38MB | 14:23282110  | synon    | G/A | 5.37E-14 | 15  | 99 | 39 | 99 | 0/1 | 0/1 | 0/1 | match | match | match |
| 108971 | TruSeqV2    | 14:23282152  | synon    | G/G | 1.44E-14 | 1   | 3  | 33 | 87 | 0/0 | 0/0 | 0/0 | match | match | match |
| 115239 | TruSeqV2    | 14:23282152  | synon    | G/G | 3.33E-15 | 3   | 9  | 9  | 27 | 0/0 | 0/0 | 0/0 | match | match | match |
| 132306 | Agilent38MB | 14:23282152  | synon    | G/G | 1.33E-15 | 26  | 69 | 19 | 51 | 0/0 | 0/0 | 0/0 | match | match | match |
| 163383 | TruSeqV2    | 14:23282152  | synon    | G/G | 5.11E-15 | 5   | 12 | 29 | 78 | 0/0 | 0/0 | 0/0 | match | match | match |

|        |             |             |          |     |          |     |    |    |    |     |     |     |       |       |       |
|--------|-------------|-------------|----------|-----|----------|-----|----|----|----|-----|-----|-----|-------|-------|-------|
| 198564 | Agilent38MB | 14:23282152 | synon    | G/G | 5.55E-15 | 42  | 99 | 26 | 69 | 0/0 | 0/0 | 0/0 | match | match | match |
| 108971 | TruSeqV2    | 14:23282449 | synon    | T/C | 2.00E-15 | 252 | 99 | 26 | 19 | 0/1 | 0/1 | 0/1 | match | match | match |
| 115239 | TruSeqV2    | 14:23282449 | synon    | C/C | 2.89E-15 | 163 | 99 | 18 | 45 | 0/0 | 0/0 | 0/0 | match | match | match |
| 132306 | Agilent38MB | 14:23282449 | synon    | T/C | 6.66E-16 | 62  | 99 | 25 | 99 | 0/1 | 0/1 | 0/1 | match | match | match |
| 163383 | TruSeqV2    | 14:23282449 | synon    | T/T | 1.11E-15 | 234 | 99 | 22 | 66 | 1/1 | 1/1 | 1/1 | match | match | match |
| 198564 | Agilent38MB | 14:23282449 | synon    | T/C | 3.77E-15 | 114 | 99 | 32 | 99 | 0/1 | 0/1 | 0/1 | match | match | match |
| 108971 | TruSeqV2    | 14:23284572 | 5'UTR    | G/A | 2.22E-16 | 77  | 99 | 24 | 99 | 0/1 | 0/1 | 0/1 | match | match | match |
| 115239 | TruSeqV2    | 14:23284572 | 5'UTR    | A/A | 1.71E-13 | 59  | 99 | 31 | 50 | 0/0 | 0/0 | 0/0 | match | match | match |
| 163383 | TruSeqV2    | 14:23284572 | 5'UTR    | G/G | 3.55E-15 | 68  | 99 | 39 | 99 | 1/1 | 1/1 | 1/1 | match | match | match |
| 198564 | Agilent38MB | 14:23284572 | 5'UTR    | A/A | 9.77E-15 | 4   | 9  | 46 | 99 | 0/0 | 0/0 | 0/0 | match | match | match |
| 108971 | TruSeqV2    | 14:23595721 | 3'UTR    | A/A | 1.78E-15 | 138 | 99 | 34 | 93 | 0/0 | 0/0 | 0/0 | match | match | match |
| 115239 | TruSeqV2    | 14:23595721 | 3'UTR    | G/A | 2.22E-15 | 75  | 99 | 13 | 99 | 0/1 | 0/1 | 0/1 | match | match | match |
| 163383 | TruSeqV2    | 14:23595721 | 3'UTR    | A/A | 8.88E-16 | 98  | 99 | 30 | 78 | 0/0 | 0/0 | 0/0 | match | match | match |
| 198564 | Agilent38MB | 14:23595721 | 3'UTR    | A/A | 6.66E-16 | 2   | 6  | 34 | 93 | 0/0 | 0/0 | 0/0 | match | match | match |
| 198564 | Agilent38MB | 14:23632506 | intronic | A/A | 9.99E-15 | 2   | 6  | 25 | 66 | 0/0 | 0/0 | 0/0 | match | match | match |
| 132306 | Agilent38MB | 14:23636757 | intronic | A/A | 6.88E-15 | 3   | 9  | 26 | 66 | 0/0 | 0/0 | 0/0 | match | match | match |
| 132306 | Agilent38MB | 14:23640794 | intronic | A/A | 2.22E-15 | 2   | 6  | 42 | 99 | 0/0 | 0/0 | 0/0 | match | match | match |
| 108971 | TruSeqV2    | 14:23652004 | synon    | G/G | 4.44E-16 | 64  | 99 | 45 | 99 | 0/0 | 0/0 | 0/0 | match | match | match |
| 115239 | TruSeqV2    | 14:23652004 | synon    | G/G | 4.44E-16 | 30  | 84 | 30 | 78 | 0/0 | 0/0 | 0/0 | match | match | match |
| 132306 | Agilent38MB | 14:23652004 | synon    | G/G | 2.22E-16 | 57  | 99 | 28 | 75 | 0/0 | 0/0 | 0/0 | match | match | match |
| 163383 | TruSeqV2    | 14:23652004 | synon    | G/G | 6.66E-16 | 38  | 99 | 24 | 69 | 0/0 | 0/0 | 0/0 | match | match | match |
| 198564 | Agilent38MB | 14:23652004 | synon    | G/G | 1.11E-15 | 92  | 99 | 32 | 90 | 0/0 | 0/0 | 0/0 | match | match | match |
| 108971 | TruSeqV2    | 14:70243089 | synon    | G/G | 4.44E-16 | 32  | 72 | 30 | 78 | 0/0 | 0/0 | 0/0 | match | match | match |
| 115239 | TruSeqV2    | 14:70243089 | synon    | G/G | 4.44E-16 | 41  | 84 | 35 | 93 | 0/0 | 0/0 | 0/0 | match | match | match |
| 132306 | Agilent38MB | 14:70243089 | synon    | G/G | 6.66E-16 | 71  | 99 | 29 | 72 | 0/0 | 0/0 | 0/0 | match | match | match |
| 163383 | TruSeqV2    | 14:70243089 | synon    | G/G | 4.44E-16 | 54  | 99 | 22 | 54 | 0/0 | 0/0 | 0/0 | match | match | match |
| 198564 | Agilent38MB | 14:70243089 | synon    | G/G | 4.44E-16 | 130 | 99 | 27 | 72 | 0/0 | 0/0 | 0/0 | match | match | match |
| 108971 | TruSeqV2    | 14:70245053 | missense | T/T | 6.66E-16 | 144 | 99 | 39 | 99 | 0/0 | 0/0 | 0/0 | match | match | match |
| 115239 | TruSeqV2    | 14:70245053 | missense | T/T | 6.66E-16 | 94  | 99 | 29 | 78 | 0/0 | 0/0 | 0/0 | match | match | match |
| 132306 | Agilent38MB | 14:70245053 | missense | T/T | 4.44E-16 | 29  | 78 | 38 | 99 | 0/0 | 0/0 | 0/0 | match | match | match |
| 163383 | TruSeqV2    | 14:70245053 | missense | T/T | 4.44E-16 | 119 | 99 | 34 | 84 | 0/0 | 0/0 | 0/0 | match | match | match |
| 198564 | Agilent38MB | 14:70245053 | missense | T/T | 8.88E-16 | 69  | 99 | 42 | 99 | 0/0 | 0/0 | 0/0 | match | match | match |
| 108971 | TruSeqV2    | 14:70245157 | missense | A/A | 2.22E-16 | 273 | 99 | 37 | 90 | 0/0 | 0/0 | 0/0 | match | match | match |
| 115239 | TruSeqV2    | 14:70245157 | missense | A/A | 2.22E-16 | 171 | 99 | 44 | 99 | 0/0 | 0/0 | 0/0 | match | match | match |
| 132306 | Agilent38MB | 14:70245157 | missense | A/A | 4.44E-16 | 57  | 99 | 35 | 87 | 0/0 | 0/0 | 0/0 | match | match | match |
| 163383 | TruSeqV2    | 14:70245157 | missense | A/A | 2.22E-16 | 195 | 99 | 38 | 99 | 0/0 | 0/0 | 0/0 | match | match | match |
| 198564 | Agilent38MB | 14:70245157 | missense | A/A | 2.22E-16 | 113 | 99 | 33 | 87 | 0/0 | 0/0 | 0/0 | match | match | match |
| 108971 | TruSeqV2    | 14:70245193 | missense | G/G | 2.44E-15 | 230 | 99 | 35 | 93 | 0/0 | 0/0 | 0/0 | match | match | match |

|        |             |             |          |     |          |     |    |    |    |     |     |     |       |       |       |
|--------|-------------|-------------|----------|-----|----------|-----|----|----|----|-----|-----|-----|-------|-------|-------|
| 115239 | TruSeqV2    | 14:70245193 | missense | G/G | 4.44E-16 | 134 | 99 | 43 | 99 | 0/0 | 0/0 | 0/0 | match | match | match |
| 132306 | Agilent38MB | 14:70245193 | missense | G/G | 6.66E-16 | 84  | 99 | 35 | 90 | 0/0 | 0/0 | 0/0 | match | match | match |
| 163383 | TruSeqV2    | 14:70245193 | missense | G/G | 2.00E-15 | 148 | 99 | 33 | 87 | 0/0 | 0/0 | 0/0 | match | match | match |
| 198564 | Agilent38MB | 14:70245193 | missense | G/G | 6.39E-14 | 156 | 99 | 36 | 99 | 0/0 | 0/0 | 0/0 | match | match | match |
| 108971 | TruSeqV2    | 14:70245977 | missense | A/A | 8.88E-16 | 248 | 99 | 24 | 69 | 0/0 | 0/0 | 0/0 | match | match | match |
| 115239 | TruSeqV2    | 14:70245977 | missense | A/A | 4.44E-16 | 159 | 99 | 33 | 84 | 0/0 | 0/0 | 0/0 | match | match | match |
| 132306 | Agilent38MB | 14:70245977 | missense | A/A | 2.22E-16 | 78  | 99 | 33 | 67 | 0/0 | 0/0 | 0/0 | match | match | match |
| 163383 | TruSeqV2    | 14:70245977 | missense | A/A | 2.22E-16 | 212 | 99 | 20 | 54 | 0/0 | 0/0 | 0/0 | match | match | match |
| 198564 | Agilent38MB | 14:70245977 | missense | A/A | 1.11E-15 | 148 | 99 | 32 | 78 | 0/0 | 0/0 | 0/0 | match | match | match |
| 108971 | TruSeqV2    | 14:70246018 | synon    | A/A | 2.22E-16 | 200 | 99 | 32 | 93 | 0/0 | 0/0 | 0/0 | match | match | match |
| 115239 | TruSeqV2    | 14:70246018 | synon    | A/A | 2.22E-16 | 134 | 99 | 36 | 90 | 0/0 | 0/0 | 0/0 | match | match | match |
| 132306 | Agilent38MB | 14:70246018 | synon    | A/A | 2.22E-16 | 114 | 99 | 25 | 66 | 0/0 | 0/0 | 0/0 | match | match | match |
| 163383 | TruSeqV2    | 14:70246018 | synon    | A/A | 4.44E-16 | 189 | 99 | 27 | 75 | 0/0 | 0/0 | 0/0 | match | match | match |
| 198564 | Agilent38MB | 14:70246018 | synon    | A/A | 6.66E-16 | 241 | 99 | 29 | 81 | 0/0 | 0/0 | 0/0 | match | match | match |
| 108971 | TruSeqV2    | 14:70263648 | synon    | C/C | 1.33E-15 | 157 | 99 | 35 | 84 | 0/0 | 0/0 | 0/0 | match | match | match |
| 115239 | TruSeqV2    | 14:70263648 | synon    | C/C | 1.78E-15 | 108 | 99 | 28 | 69 | 0/0 | 0/0 | 0/0 | match | match | match |
| 132306 | Agilent38MB | 14:70263648 | synon    | C/C | 4.44E-16 | 58  | 99 | 38 | 99 | 0/0 | 0/0 | 0/0 | match | match | match |
| 163383 | TruSeqV2    | 14:70263648 | synon    | C/C | 1.78E-15 | 111 | 99 | 36 | 93 | 0/0 | 0/0 | 0/0 | match | match | match |
| 198564 | Agilent38MB | 14:70263648 | synon    | C/C | 6.66E-16 | 124 | 99 | 38 | 99 | 0/0 | 0/0 | 0/0 | match | match | match |
| 108971 | TruSeqV2    | 14:77793207 | missense | G/G | 1.11E-15 | 139 | 99 | 61 | 99 | 0/0 | 0/0 | 0/0 | match | match | match |
| 115239 | TruSeqV2    | 14:77793207 | missense | A/G | 1.33E-15 | 93  | 99 | 18 | 99 | 0/1 | 0/1 | 0/1 | match | match | match |
| 132306 | Agilent38MB | 14:77793207 | missense | A/G | 1.33E-15 | 35  | 99 | 34 | 99 | 0/1 | 0/1 | 0/1 | match | match | match |
| 163383 | TruSeqV2    | 14:77793207 | missense | G/G | 1.11E-15 | 126 | 99 | 41 | 99 | 0/0 | 0/0 | 0/0 | match | match | match |
| 198564 | Agilent38MB | 14:77793207 | missense | G/G | 2.22E-15 | 78  | 99 | 49 | 99 | 0/0 | 0/0 | 0/0 | match | match | match |
| 108971 | TruSeqV2    | 14:77793237 | missense | G/G | 4.44E-16 | 120 | 99 | 57 | 99 | 0/0 | 0/0 | 0/0 | match | match | match |
| 115239 | TruSeqV2    | 14:77793237 | missense | G/G | 2.22E-16 | 91  | 99 | 23 | 60 | 0/0 | 0/0 | 0/0 | match | match | match |
| 132306 | Agilent38MB | 14:77793237 | missense | G/G | 2.22E-16 | 43  | 99 | 39 | 99 | 0/0 | 0/0 | 0/0 | match | match | match |
| 163383 | TruSeqV2    | 14:77793237 | missense | G/G | 4.44E-16 | 107 | 99 | 45 | 99 | 0/0 | 0/0 | 0/0 | match | match | match |
| 198564 | Agilent38MB | 14:77793237 | missense | G/G | 1.11E-15 | 76  | 99 | 41 | 99 | 0/0 | 0/0 | 0/0 | match | match | match |
| 108971 | TruSeqV2    | 14:77794283 | missense | C/C | 1.93E-14 | 87  | 99 | 25 | 74 | 1/1 | 1/1 | 1/1 | match | match | match |
| 115239 | TruSeqV2    | 14:77794283 | missense | C/C | 8.88E-16 | 54  | 99 | 16 | 48 | 1/1 | 1/1 | 1/1 | match | match | match |
| 132306 | Agilent38MB | 14:77794283 | missense | C/C | 8.88E-16 | 69  | 99 | 20 | 59 | 1/1 | 1/1 | 1/1 | match | match | match |
| 163383 | TruSeqV2    | 14:77794283 | missense | C/T | 8.22E-15 | 51  | 99 | 26 | 99 | 0/1 | 0/1 | 0/1 | match | match | match |
| 198564 | Agilent38MB | 14:77794283 | missense | C/C | 6.66E-16 | 137 | 99 | 22 | 65 | 1/1 | 1/1 | 1/1 | match | match | match |
| 108971 | TruSeqV2    | 14:77795520 | missense | A/A | 7.11E-15 | 126 | 99 | 44 | 99 | 0/0 | 0/0 | 0/0 | match | match | match |
| 115239 | TruSeqV2    | 14:77795520 | missense | A/A | 7.33E-15 | 78  | 99 | 20 | 57 | 0/0 | 0/0 | 0/0 | match | match | match |
| 132306 | Agilent38MB | 14:77795520 | missense | A/A | 6.66E-16 | 67  | 99 | 34 | 81 | 0/0 | 0/0 | 0/0 | match | match | match |
| 163383 | TruSeqV2    | 14:77795520 | missense | A/A | 4.44E-16 | 101 | 99 | 38 | 93 | 0/0 | 0/0 | 0/0 | match | match | match |

|        |             |             |          |     |          |     |    |    |    |     |     |     |       |       |       |
|--------|-------------|-------------|----------|-----|----------|-----|----|----|----|-----|-----|-----|-------|-------|-------|
| 198564 | Agilent38MB | 14:77795520 | missense | A/A | 2.89E-14 | 136 | 99 | 33 | 87 | 0/0 | 0/0 | 0/0 | match | match | match |
| 108971 | TruSeqV2    | 15:45554267 | missense | A/C | 8.88E-16 | 89  | 99 | 41 | 99 | 0/1 | 0/1 | 0/1 | match | match | match |
| 132306 | Agilent38MB | 15:45554267 | missense | A/C | 8.88E-16 | 71  | 99 | 32 | 99 | 0/1 | 0/1 | 0/1 | match | match | match |
| 163383 | TruSeqV2    | 15:45554267 | missense | A/A | 4.22E-15 | 82  | 99 | 38 | 99 | 1/1 | 1/1 | 1/1 | match | match | match |
| 198564 | Agilent38MB | 15:45554267 | missense | A/C | 6.66E-16 | 156 | 99 | 60 | 99 | 0/1 | 0/1 | 0/1 | match | match | match |
| 108971 | TruSeqV2    | 15:45556120 | missense | T/T | 1.11E-15 | 199 | 99 | 54 | 99 | 0/0 | 0/0 | 0/0 | match | match | match |
| 115239 | TruSeqV2    | 15:45556120 | missense | T/T | 1.78E-15 | 108 | 99 | 44 | 99 | 0/0 | 0/0 | 0/0 | match | match | match |
| 132306 | Agilent38MB | 15:45556120 | missense | T/T | 1.33E-15 | 78  | 99 | 33 | 90 | 0/0 | 0/0 | 0/0 | match | match | match |
| 163383 | TruSeqV2    | 15:45556120 | missense | T/T | 1.33E-15 | 177 | 99 | 41 | 99 | 0/0 | 0/0 | 0/0 | match | match | match |
| 198564 | Agilent38MB | 15:45556120 | missense | T/T | 3.62E-14 | 182 | 99 | 39 | 96 | 0/0 | 0/0 | 0/0 | match | match | match |
| 108971 | TruSeqV2    | 15:45556163 | synon    | T/T | 1.33E-15 | 189 | 99 | 51 | 99 | 0/0 | 0/0 | 0/0 | match | match | match |
| 115239 | TruSeqV2    | 15:45556163 | synon    | T/T | 6.66E-16 | 123 | 99 | 41 | 99 | 0/0 | 0/0 | 0/0 | match | match | match |
| 132306 | Agilent38MB | 15:45556163 | synon    | T/T | 1.33E-15 | 109 | 99 | 45 | 99 | 0/0 | 0/0 | 0/0 | match | match | match |
| 163383 | TruSeqV2    | 15:45556163 | synon    | T/T | 8.88E-16 | 163 | 99 | 42 | 99 | 0/0 | 0/0 | 0/0 | match | match | match |
| 198564 | Agilent38MB | 15:45556163 | synon    | T/T | 2.28E-13 | 209 | 99 | 43 | 99 | 0/0 | 0/0 | 0/0 | match | match | match |
| 108971 | TruSeqV2    | 15:45557318 | missense | G/G | 1.33E-15 | 95  | 99 | 44 | 99 | 0/0 | 0/0 | 0/0 | match | match | match |
| 115239 | TruSeqV2    | 15:45557318 | missense | G/G | 8.88E-16 | 68  | 99 | 38 | 96 | 0/0 | 0/0 | 0/0 | match | match | match |
| 132306 | Agilent38MB | 15:45557318 | missense | G/G | 1.11E-15 | 180 | 99 | 47 | 99 | 0/0 | 0/0 | 0/0 | match | match | match |
| 163383 | TruSeqV2    | 15:45557318 | missense | G/G | 4.44E-16 | 69  | 99 | 34 | 87 | 0/0 | 0/0 | 0/0 | match | match | match |
| 198564 | Agilent38MB | 15:45557318 | missense | G/G | 1.33E-15 | 422 | 99 | 39 | 99 | 0/0 | 0/0 | 0/0 | match | match | match |
| 108971 | TruSeqV2    | 15:45559703 | synon    | T/T | 2.22E-16 | 129 | 99 | 50 | 99 | 0/0 | 0/0 | 0/0 | match | match | match |
| 115239 | TruSeqV2    | 15:45559703 | synon    | T/T | 2.22E-16 | 114 | 99 | 37 | 90 | 0/0 | 0/0 | 0/0 | match | match | match |
| 132306 | Agilent38MB | 15:45559703 | synon    | T/T | 2.22E-16 | 98  | 99 | 41 | 99 | 0/0 | 0/0 | 0/0 | match | match | match |
| 163383 | TruSeqV2    | 15:45559703 | synon    | T/T | 2.22E-16 | 104 | 99 | 41 | 99 | 0/0 | 0/0 | 0/0 | match | match | match |
| 198564 | Agilent38MB | 15:45559703 | synon    | T/T | 8.88E-16 | 202 | 99 | 61 | 99 | 0/0 | 0/0 | 0/0 | match | match | match |
| 108971 | TruSeqV2    | 15:45559774 | missense | T/T | 4.44E-16 | 152 | 99 | 43 | 99 | 0/0 | 0/0 | 0/0 | match | match | match |
| 115239 | TruSeqV2    | 15:45559774 | missense | T/T | 2.22E-16 | 112 | 99 | 44 | 99 | 0/0 | 0/0 | 0/0 | match | match | match |
| 132306 | Agilent38MB | 15:45559774 | missense | T/T | 4.44E-16 | 165 | 99 | 43 | 99 | 0/0 | 0/0 | 0/0 | match | match | match |
| 163383 | TruSeqV2    | 15:45559774 | missense | T/T | 2.22E-16 | 117 | 99 | 39 | 89 | 0/0 | 0/0 | 0/0 | match | match | match |
| 198564 | Agilent38MB | 15:45559774 | missense | T/T | 4.44E-16 | 293 | 99 | 48 | 99 | 0/0 | 0/0 | 0/0 | match | match | match |
| 108971 | TruSeqV2    | 15:45561693 | missense | G/G | 4.44E-16 | 240 | 99 | 35 | 99 | 0/0 | 0/0 | 0/0 | match | match | match |
| 115239 | TruSeqV2    | 15:45561693 | missense | G/G | 2.22E-16 | 162 | 99 | 43 | 99 | 0/0 | 0/0 | 0/0 | match | match | match |
| 132306 | Agilent38MB | 15:45561693 | missense | G/G | 4.44E-16 | 115 | 99 | 40 | 99 | 0/0 | 0/0 | 0/0 | match | match | match |
| 163383 | TruSeqV2    | 15:45561693 | missense | G/G | 2.22E-16 | 192 | 99 | 44 | 99 | 0/0 | 0/0 | 0/0 | match | match | match |
| 198564 | Agilent38MB | 15:45561693 | missense | G/G | 2.22E-16 | 225 | 99 | 58 | 99 | 0/0 | 0/0 | 0/0 | match | match | match |
| 108971 | TruSeqV2    | 15:51502082 | 3'UTR    | A/A | 2.22E-16 | 154 | 99 | 47 | 99 | 0/0 | 0/0 | 0/0 | match | match | match |
| 115239 | TruSeqV2    | 15:51502082 | 3'UTR    | A/A | 2.22E-16 | 106 | 99 | 51 | 99 | 0/0 | 0/0 | 0/0 | match | match | match |
| 163383 | TruSeqV2    | 15:51502082 | 3'UTR    | A/A | 2.22E-16 | 139 | 99 | 37 | 84 | 0/0 | 0/0 | 0/0 | match | match | match |

|        |             |             |          |     |          |     |    |    |    |     |     |     |       |       |       |
|--------|-------------|-------------|----------|-----|----------|-----|----|----|----|-----|-----|-----|-------|-------|-------|
| 108971 | TruSeqV2    | 15:51502298 | 3'UTR    | A/A | 4.44E-16 | 71  | 99 | 63 | 99 | 0/0 | 0/0 | 0/0 | match | match | match |
| 115239 | TruSeqV2    | 15:51502298 | 3'UTR    | A/A | 4.44E-16 | 61  | 99 | 50 | 99 | 0/0 | 0/0 | 0/0 | match | match | match |
| 163383 | TruSeqV2    | 15:51502298 | 3'UTR    | A/A | 4.44E-16 | 64  | 99 | 34 | 93 | 0/0 | 0/0 | 0/0 | match | match | match |
| 108971 | TruSeqV2    | 15:51502844 | 3'UTR    | C/A | 2.49E-14 | 212 | 99 | 37 | 99 | 0/1 | 0/1 | 0/1 | match | match | match |
| 115239 | TruSeqV2    | 15:51502844 | 3'UTR    | C/C | 3.77E-15 | 169 | 99 | 29 | 87 | 1/1 | 1/1 | 1/1 | match | match | match |
| 132306 | Agilent38MB | 15:51502844 | 3'UTR    | C/C | 1.55E-15 | 12  | 36 | 26 | 78 | 1/1 | 1/1 | 1/1 | match | match | match |
| 163383 | TruSeqV2    | 15:51502844 | 3'UTR    | C/C | 1.55E-14 | 168 | 99 | 45 | 99 | 1/1 | 1/1 | 1/1 | match | match | match |
| 198564 | Agilent38MB | 15:51502844 | 3'UTR    | C/A | 6.44E-15 | 18  | 99 | 49 | 99 | 0/1 | 0/1 | 0/1 | match | match | match |
| 108971 | TruSeqV2    | 15:51502893 | 3'UTR    | G/G | 1.11E-15 | 179 | 99 | 34 | 87 | 0/0 | 0/0 | 0/0 | match | match | match |
| 115239 | TruSeqV2    | 15:51502893 | 3'UTR    | G/G | 4.44E-16 | 142 | 99 | 34 | 93 | 0/0 | 0/0 | 0/0 | match | match | match |
| 132306 | Agilent38MB | 15:51502893 | 3'UTR    | G/G | 2.22E-15 | 50  | 99 | 34 | 90 | 0/0 | 0/0 | 0/0 | match | match | match |
| 163383 | TruSeqV2    | 15:51502893 | 3'UTR    | G/G | 1.11E-15 | 160 | 99 | 42 | 99 | 0/0 | 0/0 | 0/0 | match | match | match |
| 198564 | Agilent38MB | 15:51502893 | 3'UTR    | G/G | 6.66E-16 | 80  | 99 | 50 | 99 | 0/0 | 0/0 | 0/0 | match | match | match |
| 108971 | TruSeqV2    | 15:51502986 | 3'UTR    | G/A | 1.11E-15 | 177 | 99 | 36 | 99 | 0/1 | 0/1 | 0/1 | match | match | match |
| 115239 | TruSeqV2    | 15:51502986 | 3'UTR    | G/A | 2.66E-15 | 128 | 99 | 50 | 99 | 0/1 | 0/1 | 0/1 | match | match | match |
| 132306 | Agilent38MB | 15:51502986 | 3'UTR    | G/G | 8.88E-16 | 335 | 99 | 37 | 99 | 0/0 | 0/0 | 0/0 | match | match | match |
| 163383 | TruSeqV2    | 15:51502986 | 3'UTR    | G/A | 8.88E-16 | 141 | 99 | 36 | 99 | 0/1 | 0/1 | 0/1 | match | match | match |
| 198564 | Agilent38MB | 15:51502986 | 3'UTR    | G/G | 8.88E-16 | 647 | 99 | 39 | 99 | 0/0 | 0/0 | 0/0 | match | match | match |
| 108971 | TruSeqV2    | 15:51504556 | synon    | G/G | 2.66E-15 | 97  | 99 | 40 | 99 | 0/0 | 0/0 | 0/0 | match | match | match |
| 115239 | TruSeqV2    | 15:51504556 | synon    | G/G | 1.53E-14 | 58  | 99 | 40 | 99 | 0/0 | 0/0 | 0/0 | match | match | match |
| 132306 | Agilent38MB | 15:51504556 | synon    | G/G | 2.89E-15 | 127 | 99 | 39 | 99 | 0/0 | 0/0 | 0/0 | match | match | match |
| 163383 | TruSeqV2    | 15:51504556 | synon    | G/G | 4.44E-16 | 97  | 99 | 38 | 99 | 0/0 | 0/0 | 0/0 | match | match | match |
| 198564 | Agilent38MB | 15:51504556 | synon    | G/G | 3.77E-15 | 249 | 99 | 38 | 99 | 0/0 | 0/0 | 0/0 | match | match | match |
| 108971 | TruSeqV2    | 15:51507967 | missense | C/C | 1.55E-15 | 127 | 99 | 46 | 99 | 0/0 | 0/0 | 0/0 | match | match | match |
| 115239 | TruSeqV2    | 15:51507967 | missense | C/C | 8.88E-16 | 99  | 99 | 57 | 99 | 0/0 | 0/0 | 0/0 | match | match | match |
| 132306 | Agilent38MB | 15:51507967 | missense | C/C | 1.11E-15 | 244 | 99 | 32 | 87 | 0/0 | 0/0 | 0/0 | match | match | match |
| 163383 | TruSeqV2    | 15:51507967 | missense | C/C | 1.33E-15 | 97  | 99 | 43 | 99 | 0/0 | 0/0 | 0/0 | match | match | match |
| 198564 | Agilent38MB | 15:51507967 | missense | C/C | 2.00E-15 | 433 | 99 | 55 | 99 | 0/0 | 0/0 | 0/0 | match | match | match |
| 108971 | TruSeqV2    | 15:51507968 | missense | G/G | 1.78E-15 | 128 | 99 | 47 | 99 | 0/0 | 0/0 | 0/0 | match | match | match |
| 115239 | TruSeqV2    | 15:51507968 | missense | G/G | 1.11E-15 | 99  | 99 | 55 | 99 | 0/0 | 0/0 | 0/0 | match | match | match |
| 132306 | Agilent38MB | 15:51507968 | missense | G/G | 8.88E-16 | 243 | 99 | 33 | 93 | 0/0 | 0/0 | 0/0 | match | match | match |
| 163383 | TruSeqV2    | 15:51507968 | missense | G/G | 8.88E-16 | 96  | 99 | 41 | 99 | 0/0 | 0/0 | 0/0 | match | match | match |
| 198564 | Agilent38MB | 15:51507968 | missense | G/G | 6.66E-16 | 429 | 99 | 52 | 99 | 0/0 | 0/0 | 0/0 | match | match | match |
| 108971 | TruSeqV2    | 15:51529112 | synon    | T/C | 6.66E-16 | 208 | 99 | 39 | 99 | 0/1 | 0/1 | 0/1 | match | match | match |
| 115239 | TruSeqV2    | 15:51529112 | synon    | T/C | 8.88E-16 | 125 | 99 | 21 | 99 | 0/1 | 0/1 | 0/1 | match | match | match |
| 132306 | Agilent38MB | 15:51529112 | synon    | T/T | 8.88E-16 | 210 | 99 | 34 | 78 | 0/0 | 0/0 | 0/0 | match | match | match |
| 163383 | TruSeqV2    | 15:51529112 | synon    | T/C | 4.44E-16 | 162 | 99 | 35 | 99 | 0/1 | 0/1 | 0/1 | match | match | match |
| 198564 | Agilent38MB | 15:51529112 | synon    | T/T | 4.88E-15 | 449 | 99 | 38 | 93 | 0/0 | 0/0 | 0/0 | match | match | match |



|        |             |             |          |     |          |     |    |    |    |     |     |     |       |       |       |
|--------|-------------|-------------|----------|-----|----------|-----|----|----|----|-----|-----|-----|-------|-------|-------|
| 108971 | TruSeqV2    | 15:51534995 | missense | A/A | 2.22E-16 | 108 | 99 | 35 | 81 | 0/0 | 0/0 | 0/0 | match | match | match |
| 115239 | TruSeqV2    | 15:51534995 | missense | A/A | 4.44E-16 | 73  | 99 | 45 | 99 | 0/0 | 0/0 | 0/0 | match | match | match |
| 132306 | Agilent38MB | 15:51534995 | missense | A/A | 4.44E-16 | 75  | 99 | 38 | 99 | 0/0 | 0/0 | 0/0 | match | match | match |
| 163383 | TruSeqV2    | 15:51534995 | missense | A/A | 4.44E-16 | 83  | 99 | 49 | 99 | 0/0 | 0/0 | 0/0 | match | match | match |
| 198564 | Agilent38MB | 15:51534995 | missense | A/A | 6.66E-16 | 135 | 99 | 34 | 87 | 0/0 | 0/0 | 0/0 | match | match | match |
| 198564 | Agilent38MB | 15:51547938 | intronic | C/C | 1.33E-15 | 2   | 3  | 47 | 99 | 0/0 | 0/0 | 0/0 | match | match | match |
| 108971 | TruSeqV2    | 15:74631994 | missense | T/T | 6.66E-16 | 141 | 99 | 29 | 78 | 0/0 | 0/0 | 0/0 | match | match | match |
| 115239 | TruSeqV2    | 15:74631994 | missense | T/T | 6.66E-16 | 101 | 99 | 23 | 51 | 0/0 | 0/0 | 0/0 | match | match | match |
| 132306 | Agilent38MB | 15:74631994 | missense | T/T | 4.44E-16 | 36  | 69 | 33 | 81 | 0/0 | 0/0 | 0/0 | match | match | match |
| 163383 | TruSeqV2    | 15:74631994 | missense | T/T | 6.66E-16 | 122 | 99 | 30 | 78 | 0/0 | 0/0 | 0/0 | match | match | match |
| 198564 | Agilent38MB | 15:74631994 | missense | T/T | 1.11E-15 | 72  | 99 | 40 | 99 | 0/0 | 0/0 | 0/0 | match | match | match |
| 108971 | TruSeqV2    | 15:74632028 | missense | G/G | 4.17E-14 | 148 | 99 | 28 | 75 | 0/0 | 0/0 | 0/0 | match | match | match |
| 115239 | TruSeqV2    | 15:74632028 | missense | G/G | 2.40E-14 | 112 | 99 | 12 | 33 | 0/0 | 0/0 | 0/0 | match | match | match |
| 132306 | Agilent38MB | 15:74632028 | missense | G/G | 7.48E-14 | 48  | 99 | 35 | 96 | 0/0 | 0/0 | 0/0 | match | match | match |
| 163383 | TruSeqV2    | 15:74632028 | missense | G/G | 3.18E-14 | 137 | 99 | 29 | 86 | 0/0 | 0/0 | 0/0 | match | match | match |
| 198564 | Agilent38MB | 15:74632028 | missense | G/G | 1.29E-14 | 101 | 99 | 35 | 99 | 0/0 | 0/0 | 0/0 | match | match | match |
| 108971 | TruSeqV2    | 15:74635369 | synon    | G/G | 8.88E-16 | 134 | 99 | 37 | 81 | 0/0 | 0/0 | 0/0 | match | match | match |
| 115239 | TruSeqV2    | 15:74635369 | synon    | G/G | 3.25E-12 | 127 | 99 | 15 | 45 | 0/0 | 0/0 | 0/0 | match | match | match |
| 132306 | Agilent38MB | 15:74635369 | synon    | G/G | 1.11E-15 | 133 | 99 | 21 | 57 | 0/0 | 0/0 | 0/0 | match | match | match |
| 163383 | TruSeqV2    | 15:74635369 | synon    | G/G | 1.55E-15 | 125 | 99 | 32 | 87 | 0/0 | 0/0 | 0/0 | match | match | match |
| 198564 | Agilent38MB | 15:74635369 | synon    | G/G | 9.68E-14 | 250 | 99 | 48 | 99 | 0/0 | 0/0 | 0/0 | match | match | match |
| 108971 | TruSeqV2    | 15:74635405 | missense | G/G | 4.44E-16 | 194 | 99 | 32 | 81 | 0/0 | 0/0 | 0/0 | match | match | match |
| 115239 | TruSeqV2    | 15:74635405 | missense | G/G | 2.22E-16 | 157 | 99 | 23 | 56 | 0/0 | 0/0 | 0/0 | match | match | match |
| 132306 | Agilent38MB | 15:74635405 | missense | G/G | 2.22E-16 | 75  | 99 | 30 | 81 | 0/0 | 0/0 | 0/0 | match | match | match |
| 163383 | TruSeqV2    | 15:74635405 | missense | G/G | 4.44E-16 | 164 | 99 | 38 | 99 | 0/0 | 0/0 | 0/0 | match | match | match |
| 198564 | Agilent38MB | 15:74635405 | missense | G/G | 4.44E-16 | 146 | 99 | 44 | 99 | 0/0 | 0/0 | 0/0 | match | match | match |
| 108971 | TruSeqV2    | 15:74636323 | synon    | G/G | 4.44E-16 | 74  | 99 | 60 | 99 | 0/0 | 0/0 | 0/0 | match | match | match |
| 115239 | TruSeqV2    | 15:74636323 | synon    | G/G | 4.44E-16 | 67  | 99 | 21 | 54 | 0/0 | 0/0 | 0/0 | match | match | match |
| 132306 | Agilent38MB | 15:74636323 | synon    | G/G | 4.44E-16 | 76  | 99 | 34 | 87 | 0/0 | 0/0 | 0/0 | match | match | match |
| 163383 | TruSeqV2    | 15:74636323 | synon    | G/G | 4.44E-16 | 64  | 99 | 46 | 99 | 0/0 | 0/0 | 0/0 | match | match | match |
| 198564 | Agilent38MB | 15:74636323 | synon    | G/G | 8.88E-16 | 131 | 99 | 39 | 99 | 0/0 | 0/0 | 0/0 | match | match | match |
| 108971 | TruSeqV2    | 15:74637475 | missense | C/C | 2.20E-14 | 97  | 99 | 37 | 96 | 0/0 | 0/0 | 0/0 | match | match | match |
| 115239 | TruSeqV2    | 15:74637475 | missense | C/C | 6.77E-14 | 75  | 99 | 27 | 78 | 0/0 | 0/0 | 0/0 | match | match | match |
| 132306 | Agilent38MB | 15:74637475 | missense | C/C | 2.66E-15 | 122 | 99 | 37 | 99 | 0/0 | 0/0 | 0/0 | match | match | match |
| 163383 | TruSeqV2    | 15:74637475 | missense | C/C | 3.33E-15 | 77  | 99 | 33 | 84 | 0/0 | 0/0 | 0/0 | match | match | match |
| 198564 | Agilent38MB | 15:74637475 | missense | C/C | 3.04E-11 | 208 | 99 | 33 | 87 | 0/0 | 0/0 | 0/0 | match | match | match |
| 108971 | TruSeqV2    | 15:74659880 | missense | C/C | 1.40E-14 | 87  | 99 | 35 | 87 | 0/0 | 0/0 | 0/0 | match | match | match |
| 115239 | TruSeqV2    | 15:74659880 | missense | C/C | 1.55E-15 | 52  | 99 | 25 | 66 | 0/0 | 0/0 | 0/0 | match | match | match |

|        |             |             |          |     |          |     |    |    |    |     |     |     |       |       |       |
|--------|-------------|-------------|----------|-----|----------|-----|----|----|----|-----|-----|-----|-------|-------|-------|
| 132306 | Agilent38MB | 15:74659880 | missense | C/C | 4.44E-16 | 24  | 48 | 29 | 75 | 0/0 | 0/0 | 0/0 | match | match | match |
| 163383 | TruSeqV2    | 15:74659880 | missense | C/C | 8.88E-16 | 84  | 99 | 45 | 99 | 0/0 | 0/0 | 0/0 | match | match | match |
| 198564 | Agilent38MB | 15:74659880 | missense | C/C | 4.44E-16 | 19  | 36 | 43 | 99 | 0/0 | 0/0 | 0/0 | match | match | match |
| 108971 | TruSeqV2    | 15:75012235 | 3'UTR    | A/A | 8.88E-16 | 240 | 99 | 33 | 96 | 0/0 | 0/0 | 0/0 | match | match | match |
| 115239 | TruSeqV2    | 15:75012235 | 3'UTR    | A/A | 4.44E-16 | 149 | 99 | 30 | 72 | 0/0 | 0/0 | 0/0 | match | match | match |
| 132306 | Agilent38MB | 15:75012235 | 3'UTR    | A/A | 2.22E-16 | 2   | 6  | 47 | 99 | 0/0 | 0/0 | 0/0 | match | match | match |
| 163383 | TruSeqV2    | 15:75012235 | 3'UTR    | A/A | 2.22E-16 | 168 | 99 | 36 | 99 | 0/0 | 0/0 | 0/0 | match | match | match |
| 108971 | TruSeqV2    | 15:75012940 | missense | G/G | 2.22E-16 | 135 | 99 | 41 | 99 | 0/0 | 0/0 | 0/0 | match | match | match |
| 115239 | TruSeqV2    | 15:75012940 | missense | G/G | 2.22E-16 | 102 | 99 | 25 | 48 | 0/0 | 0/0 | 0/0 | match | match | match |
| 132306 | Agilent38MB | 15:75012940 | missense | G/G | 2.22E-16 | 46  | 99 | 35 | 96 | 0/0 | 0/0 | 0/0 | match | match | match |
| 163383 | TruSeqV2    | 15:75012940 | missense | G/G | 4.44E-16 | 100 | 99 | 45 | 99 | 0/0 | 0/0 | 0/0 | match | match | match |
| 198564 | Agilent38MB | 15:75012940 | missense | G/G | 3.11E-15 | 69  | 99 | 41 | 99 | 0/0 | 0/0 | 0/0 | match | match | match |
| 108971 | TruSeqV2    | 15:75012979 | missense | G/G | 6.71E-14 | 148 | 99 | 40 | 99 | 0/0 | 0/0 | 0/0 | match | match | match |
| 115239 | TruSeqV2    | 15:75012979 | missense | G/G | 2.31E-13 | 105 | 99 | 21 | 57 | 0/0 | 0/0 | 0/0 | match | match | match |
| 132306 | Agilent38MB | 15:75012979 | missense | G/G | 1.27E-12 | 29  | 87 | 41 | 99 | 0/0 | 0/0 | 0/0 | match | match | match |
| 163383 | TruSeqV2    | 15:75012979 | missense | G/G | 7.02E-13 | 124 | 99 | 43 | 99 | 0/0 | 0/0 | 0/0 | match | match | match |
| 198564 | Agilent38MB | 15:75012979 | missense | G/G | 5.03E-13 | 38  | 73 | 45 | 99 | 0/0 | 0/0 | 0/0 | match | match | match |
| 108971 | TruSeqV2    | 15:75012981 | missense | G/G | 2.22E-16 | 151 | 99 | 38 | 99 | 0/0 | 0/0 | 0/0 | match | match | match |
| 115239 | TruSeqV2    | 15:75012981 | missense | G/G | 2.22E-16 | 107 | 99 | 21 | 57 | 0/0 | 0/0 | 0/0 | match | match | match |
| 132306 | Agilent38MB | 15:75012981 | missense | G/G | 1.38E-14 | 30  | 90 | 39 | 99 | 0/0 | 0/0 | 0/0 | match | match | match |
| 163383 | TruSeqV2    | 15:75012981 | missense | G/G | 1.78E-15 | 127 | 99 | 42 | 99 | 0/0 | 0/0 | 0/0 | match | match | match |
| 198564 | Agilent38MB | 15:75012981 | missense | G/G | 4.44E-16 | 36  | 90 | 43 | 99 | 0/0 | 0/0 | 0/0 | match | match | match |
| 108971 | TruSeqV2    | 15:75012985 | missense | T/T | 2.22E-16 | 157 | 99 | 38 | 93 | 0/0 | 0/0 | 0/0 | match | match | match |
| 115239 | TruSeqV2    | 15:75012985 | missense | T/T | 2.22E-16 | 114 | 99 | 21 | 60 | 0/0 | 0/0 | 0/0 | match | match | match |
| 132306 | Agilent38MB | 15:75012985 | missense | T/T | 2.22E-16 | 30  | 84 | 40 | 99 | 0/0 | 0/0 | 0/0 | match | match | match |
| 163383 | TruSeqV2    | 15:75012985 | missense | T/T | 2.22E-16 | 131 | 99 | 39 | 99 | 0/0 | 0/0 | 0/0 | match | match | match |
| 198564 | Agilent38MB | 15:75012985 | missense | T/T | 4.44E-16 | 33  | 87 | 40 | 99 | 0/0 | 0/0 | 0/0 | match | match | match |
| 108971 | TruSeqV2    | 15:75012987 | missense | G/G | 8.88E-16 | 157 | 99 | 34 | 99 | 0/0 | 0/0 | 0/0 | match | match | match |
| 115239 | TruSeqV2    | 15:75012987 | missense | G/G | 6.66E-16 | 110 | 99 | 21 | 57 | 0/0 | 0/0 | 0/0 | match | match | match |
| 132306 | Agilent38MB | 15:75012987 | missense | G/G | 6.66E-16 | 30  | 81 | 40 | 99 | 0/0 | 0/0 | 0/0 | match | match | match |
| 163383 | TruSeqV2    | 15:75012987 | missense | G/G | 1.11E-15 | 131 | 99 | 37 | 99 | 0/0 | 0/0 | 0/0 | match | match | match |
| 198564 | Agilent38MB | 15:75012987 | missense | G/G | 8.88E-16 | 33  | 84 | 39 | 99 | 0/0 | 0/0 | 0/0 | match | match | match |
| 108971 | TruSeqV2    | 15:75013026 | missense | A/A | 2.22E-16 | 162 | 99 | 36 | 99 | 0/0 | 0/0 | 0/0 | match | match | match |
| 115239 | TruSeqV2    | 15:75013026 | missense | A/A | 2.22E-16 | 104 | 99 | 23 | 57 | 0/0 | 0/0 | 0/0 | match | match | match |
| 132306 | Agilent38MB | 15:75013026 | missense | A/A | 6.66E-16 | 38  | 96 | 37 | 99 | 0/0 | 0/0 | 0/0 | match | match | match |
| 163383 | TruSeqV2    | 15:75013026 | missense | A/A | 2.22E-16 | 110 | 99 | 44 | 99 | 0/0 | 0/0 | 0/0 | match | match | match |
| 198564 | Agilent38MB | 15:75013026 | missense | A/A | 1.55E-15 | 56  | 99 | 46 | 99 | 0/0 | 0/0 | 0/0 | match | match | match |
| 108971 | TruSeqV2    | 15:75013093 | fs       | -/- | 4.97E-14 | 101 | 99 | 35 | 88 | 0/0 | 0/0 | 0/0 | match | match | match |

|        |             |             |          |     |          |     |    |    |    |     |     |     |       |       |       |
|--------|-------------|-------------|----------|-----|----------|-----|----|----|----|-----|-----|-----|-------|-------|-------|
| 115239 | TruSeqV2    | 15:75013093 | fs       | -/- | 1.34E-11 | 101 | 99 | 35 | 88 | 0/0 | 0/0 | 0/0 | match | match | match |
| 132306 | Agilent38MB | 15:75013093 | fs       | -/- | 2.95E-11 | 101 | 99 | 35 | 88 | 0/0 | 0/0 | 0/0 | match | match | match |
| 163383 | TruSeqV2    | 15:75013093 | fs       | -/- | 2.31E-12 | 101 | 99 | 35 | 88 | 0/0 | 0/0 | 0/0 | match | match | match |
| 198564 | Agilent38MB | 15:75013093 | fs       | -/- | 4.98E-12 | 101 | 99 | 35 | 88 | 0/0 | 0/0 | 0/0 | match | match | match |
| 108971 | TruSeqV2    | 15:75013563 | missense | G/G | 9.66E-12 | 237 | 99 | 29 | 75 | 0/0 | 0/0 | 0/0 | match | match | match |
| 115239 | TruSeqV2    | 15:75013563 | missense | G/G | 2.53E-12 | 174 | 99 | 27 | 81 | 0/0 | 0/0 | 0/0 | match | match | match |
| 132306 | Agilent38MB | 15:75013563 | missense | G/G | 3.39E-10 | 137 | 99 | 26 | 66 | 0/0 | 0/0 | 0/0 | match | match | match |
| 163383 | TruSeqV2    | 15:75013563 | missense | G/G | 2.00E-12 | 200 | 99 | 23 | 60 | 0/0 | 0/0 | 0/0 | match | match | match |
| 198564 | Agilent38MB | 15:75013563 | missense | G/G | 1.41E-10 | 257 | 99 | 30 | 78 | 0/0 | 0/0 | 0/0 | match | match | match |
| 108971 | TruSeqV2    | 15:75013804 | missense | C/C | 2.22E-16 | 310 | 99 | 35 | 90 | 0/0 | 0/0 | 0/0 | match | match | match |
| 115239 | TruSeqV2    | 15:75013804 | missense | C/C | 2.22E-15 | 219 | 99 | 39 | 99 | 0/0 | 0/0 | 0/0 | match | match | match |
| 132306 | Agilent38MB | 15:75013804 | missense | C/C | 2.22E-16 | 23  | 60 | 35 | 87 | 0/0 | 0/0 | 0/0 | match | match | match |
| 163383 | TruSeqV2    | 15:75013804 | missense | C/C | 2.22E-16 | 245 | 99 | 32 | 66 | 0/0 | 0/0 | 0/0 | match | match | match |
| 198564 | Agilent38MB | 15:75013804 | missense | C/C | 1.33E-15 | 45  | 99 | 39 | 99 | 0/0 | 0/0 | 0/0 | match | match | match |
| 108971 | TruSeqV2    | 15:75014027 | missense | A/A | 6.66E-16 | 248 | 99 | 56 | 99 | 0/0 | 0/0 | 0/0 | match | match | match |
| 115239 | TruSeqV2    | 15:75014027 | missense | A/A | 2.22E-16 | 162 | 99 | 34 | 90 | 0/0 | 0/0 | 0/0 | match | match | match |
| 132306 | Agilent38MB | 15:75014027 | missense | A/A | 2.22E-16 | 111 | 99 | 35 | 99 | 0/0 | 0/0 | 0/0 | match | match | match |
| 163383 | TruSeqV2    | 15:75014027 | missense | A/A | 2.22E-16 | 224 | 99 | 42 | 99 | 0/0 | 0/0 | 0/0 | match | match | match |
| 198564 | Agilent38MB | 15:75014027 | missense | A/A | 2.22E-16 | 205 | 99 | 30 | 54 | 0/0 | 0/0 | 0/0 | match | match | match |
| 108971 | TruSeqV2    | 15:75014049 | missense | G/G | 1.11E-15 | 197 | 99 | 49 | 99 | 0/0 | 0/0 | 0/0 | match | match | match |
| 115239 | TruSeqV2    | 15:75014049 | missense | G/G | 8.88E-16 | 151 | 99 | 35 | 88 | 0/0 | 0/0 | 0/0 | match | match | match |
| 132306 | Agilent38MB | 15:75014049 | missense | G/G | 2.00E-15 | 122 | 99 | 40 | 99 | 0/0 | 0/0 | 0/0 | match | match | match |
| 163383 | TruSeqV2    | 15:75014049 | missense | G/G | 1.55E-15 | 181 | 99 | 37 | 93 | 0/0 | 0/0 | 0/0 | match | match | match |
| 198564 | Agilent38MB | 15:75014049 | missense | G/G | 5.77E-15 | 216 | 99 | 35 | 90 | 0/0 | 0/0 | 0/0 | match | match | match |
| 108971 | TruSeqV2    | 15:75015305 | missense | C/C | 1.64E-14 | 137 | 99 | 34 | 96 | 0/0 | 0/0 | 0/0 | match | match | match |
| 115239 | TruSeqV2    | 15:75015305 | missense | C/C | 2.22E-16 | 100 | 99 | 27 | 69 | 0/0 | 0/0 | 0/0 | match | match | match |
| 132306 | Agilent38MB | 15:75015305 | missense | C/C | 6.66E-16 | 47  | 99 | 20 | 51 | 0/0 | 0/0 | 0/0 | match | match | match |
| 163383 | TruSeqV2    | 15:75015305 | missense | C/C | 2.22E-16 | 125 | 99 | 32 | 93 | 0/0 | 0/0 | 0/0 | match | match | match |
| 198564 | Agilent38MB | 15:75015305 | missense | C/C | 2.22E-16 | 93  | 99 | 24 | 51 | 0/0 | 0/0 | 0/0 | match | match | match |
| 108971 | TruSeqV2    | 15:75041341 | intronic | T/T | 1.33E-15 | 107 | 99 | 45 | 99 | 0/0 | 0/0 | 0/0 | match | match | match |
| 115239 | TruSeqV2    | 15:75041341 | intronic | G/T | 3.53E-14 | 67  | 99 | 34 | 99 | 0/1 | 0/1 | 0/1 | match | match | match |
| 132306 | Agilent38MB | 15:75041341 | intronic | T/T | 6.88E-15 | 2   | 3  | 43 | 99 | 0/0 | 0/0 | 0/0 | match | match | match |
| 163383 | TruSeqV2    | 15:75041341 | intronic | T/T | 3.11E-15 | 94  | 99 | 27 | 78 | 0/0 | 0/0 | 0/0 | match | match | match |
| 198564 | Agilent38MB | 15:75041341 | intronic | T/T | 3.11E-15 | 3   | 6  | 52 | 99 | 0/0 | 0/0 | 0/0 | match | match | match |
| 108971 | TruSeqV2    | 15:75041351 | intronic | C/C | 2.22E-16 | 95  | 99 | 44 | 99 | 0/0 | 0/0 | 0/0 | match | match | match |
| 115239 | TruSeqV2    | 15:75041351 | intronic | C/T | 8.17E-14 | 68  | 99 | 36 | 99 | 0/1 | 0/1 | 0/1 | match | match | match |
| 132306 | Agilent38MB | 15:75041351 | intronic | C/C | 2.22E-16 | 1   | 3  | 41 | 99 | 0/0 | 0/0 | 0/0 | match | match | match |
| 163383 | TruSeqV2    | 15:75041351 | intronic | C/C | 2.22E-16 | 85  | 99 | 29 | 75 | 0/0 | 0/0 | 0/0 | match | match | match |

|        |             |             |          |     |          |     |    |    |    |     |     |     |       |       |       |
|--------|-------------|-------------|----------|-----|----------|-----|----|----|----|-----|-----|-----|-------|-------|-------|
| 108971 | TruSeqV2    | 15:75041917 | promoter | A/C | 1.33E-15 | 8   | 99 | 47 | 99 | 0/1 | 0/1 | 0/1 | match | match | match |
| 115239 | TruSeqV2    | 15:75041917 | promoter | A/A | 4.44E-16 | 8   | 24 | 26 | 77 | 1/1 | 1/1 | 1/1 | match | match | match |
| 163383 | TruSeqV2    | 15:75041917 | promoter | A/C | 4.44E-16 | 5   | 68 | 34 | 99 | 0/1 | 0/1 | 0/1 | match | match | match |
| 108971 | TruSeqV2    | 15:75042142 | missense | C/C | 6.66E-16 | 241 | 99 | 31 | 81 | 0/0 | 0/0 | 0/0 | match | match | match |
| 115239 | TruSeqV2    | 15:75042142 | missense | C/C | 3.77E-15 | 164 | 99 | 19 | 51 | 0/0 | 0/0 | 0/0 | match | match | match |
| 132306 | Agilent38MB | 15:75042142 | missense | C/C | 2.89E-15 | 88  | 99 | 25 | 66 | 0/0 | 0/0 | 0/0 | match | match | match |
| 163383 | TruSeqV2    | 15:75042142 | missense | C/C | 2.44E-15 | 172 | 99 | 23 | 57 | 0/0 | 0/0 | 0/0 | match | match | match |
| 198564 | Agilent38MB | 15:75042142 | missense | C/C | 3.11E-15 | 168 | 99 | 39 | 99 | 0/0 | 0/0 | 0/0 | match | match | match |
| 108971 | TruSeqV2    | 15:75042204 | missense | C/C | 2.22E-16 | 367 | 99 | 35 | 87 | 0/0 | 0/0 | 0/0 | match | match | match |
| 115239 | TruSeqV2    | 15:75042204 | missense | C/C | 4.44E-16 | 223 | 99 | 20 | 54 | 0/0 | 0/0 | 0/0 | match | match | match |
| 132306 | Agilent38MB | 15:75042204 | missense | C/C | 1.78E-15 | 58  | 99 | 36 | 93 | 0/0 | 0/0 | 0/0 | match | match | match |
| 163383 | TruSeqV2    | 15:75042204 | missense | C/C | 3.33E-15 | 245 | 99 | 20 | 54 | 0/0 | 0/0 | 0/0 | match | match | match |
| 198564 | Agilent38MB | 15:75042204 | missense | C/C | 6.66E-16 | 110 | 99 | 30 | 72 | 0/0 | 0/0 | 0/0 | match | match | match |
| 108971 | TruSeqV2    | 15:75042637 | missense | C/C | 2.22E-16 | 237 | 99 | 36 | 93 | 0/0 | 0/0 | 0/0 | match | match | match |
| 115239 | TruSeqV2    | 15:75042637 | missense | C/C | 2.22E-16 | 161 | 99 | 14 | 42 | 0/0 | 0/0 | 0/0 | match | match | match |
| 132306 | Agilent38MB | 15:75042637 | missense | C/C | 6.66E-16 | 90  | 99 | 26 | 75 | 0/0 | 0/0 | 0/0 | match | match | match |
| 163383 | TruSeqV2    | 15:75042637 | missense | C/C | 2.22E-16 | 195 | 99 | 39 | 99 | 0/0 | 0/0 | 0/0 | match | match | match |
| 198564 | Agilent38MB | 15:75042637 | missense | C/C | 1.33E-15 | 105 | 99 | 29 | 78 | 0/0 | 0/0 | 0/0 | match | match | match |
| 108971 | TruSeqV2    | 15:75044195 | missense | G/G | 2.22E-16 | 124 | 99 | 36 | 99 | 0/0 | 0/0 | 0/0 | match | match | match |
| 115239 | TruSeqV2    | 15:75044195 | missense | G/G | 2.22E-16 | 67  | 99 | 21 | 51 | 0/0 | 0/0 | 0/0 | match | match | match |
| 132306 | Agilent38MB | 15:75044195 | missense | G/G | 2.22E-16 | 28  | 63 | 20 | 41 | 0/0 | 0/0 | 0/0 | match | match | match |
| 163383 | TruSeqV2    | 15:75044195 | missense | G/G | 2.22E-16 | 75  | 99 | 30 | 73 | 0/0 | 0/0 | 0/0 | match | match | match |
| 198564 | Agilent38MB | 15:75044195 | missense | G/G | 2.22E-16 | 83  | 99 | 38 | 99 | 0/0 | 0/0 | 0/0 | match | match | match |
| 108971 | TruSeqV2    | 15:75044464 | splice   | G/G | 2.22E-16 | 93  | 99 | 28 | 69 | 0/0 | 0/0 | 0/0 | match | match | match |
| 115239 | TruSeqV2    | 15:75044464 | splice   | G/G | 6.66E-16 | 85  | 99 | 12 | 27 | 0/0 | 0/0 | 0/0 | match | match | match |
| 132306 | Agilent38MB | 15:75044464 | splice   | G/G | 4.44E-16 | 106 | 99 | 38 | 99 | 0/0 | 0/0 | 0/0 | match | match | match |
| 163383 | TruSeqV2    | 15:75044464 | splice   | G/G | 2.00E-15 | 95  | 99 | 48 | 99 | 0/0 | 0/0 | 0/0 | match | match | match |
| 198564 | Agilent38MB | 15:75044464 | splice   | G/G | 7.77E-15 | 148 | 99 | 31 | 78 | 0/0 | 0/0 | 0/0 | match | match | match |
| 108971 | TruSeqV2    | 15:75044552 | missense | G/G | 2.22E-16 | 171 | 99 | 25 | 72 | 0/0 | 0/0 | 0/0 | match | match | match |
| 115239 | TruSeqV2    | 15:75044552 | missense | G/G | 2.22E-16 | 137 | 99 | 12 | 36 | 0/0 | 0/0 | 0/0 | match | match | match |
| 132306 | Agilent38MB | 15:75044552 | missense | G/G | 2.22E-16 | 291 | 99 | 20 | 57 | 0/0 | 0/0 | 0/0 | match | match | match |
| 163383 | TruSeqV2    | 15:75044552 | missense | G/G | 2.22E-16 | 131 | 99 | 24 | 72 | 0/0 | 0/0 | 0/0 | match | match | match |
| 198564 | Agilent38MB | 15:75044552 | missense | G/G | 2.22E-16 | 505 | 99 | 16 | 33 | 0/0 | 0/0 | 0/0 | match | match | match |
| 108971 | TruSeqV2    | 15:75044578 | missense | A/A | 0        | 166 | 99 | 22 | 54 | 0/0 | 0/0 | 0/0 | match | match | match |
| 115239 | TruSeqV2    | 15:75044578 | missense | A/A | 0        | 120 | 99 | 12 | 30 | 0/0 | 0/0 | 0/0 | match | match | match |
| 132306 | Agilent38MB | 15:75044578 | missense | A/A | 2.22E-16 | 303 | 99 | 27 | 75 | 0/0 | 0/0 | 0/0 | match | match | match |
| 163383 | TruSeqV2    | 15:75044578 | missense | A/A | 0        | 120 | 99 | 29 | 74 | 0/0 | 0/0 | 0/0 | match | match | match |
| 198564 | Agilent38MB | 15:75044578 | missense | A/A | 6.66E-16 | 550 | 99 | 20 | 46 | 0/0 | 0/0 | 0/0 | match | match | match |

|        |             |             |          |     |          |     |    |    |    |     |     |     |       |       |       |
|--------|-------------|-------------|----------|-----|----------|-----|----|----|----|-----|-----|-----|-------|-------|-------|
| 108971 | TruSeqV2    | 15:75045575 | missense | G/G | 2.22E-16 | 173 | 99 | 41 | 99 | 0/0 | 0/0 | 0/0 | match | match | match |
| 115239 | TruSeqV2    | 15:75045575 | missense | G/G | 4.44E-16 | 92  | 99 | 26 | 75 | 0/0 | 0/0 | 0/0 | match | match | match |
| 132306 | Agilent38MB | 15:75045575 | missense | G/G | 2.22E-16 | 140 | 99 | 21 | 60 | 0/0 | 0/0 | 0/0 | match | match | match |
| 163383 | TruSeqV2    | 15:75045575 | missense | G/G | 6.66E-16 | 136 | 99 | 37 | 96 | 0/0 | 0/0 | 0/0 | match | match | match |
| 198564 | Agilent38MB | 15:75045575 | missense | G/G | 1.58E-14 | 228 | 99 | 36 | 99 | 0/0 | 0/0 | 0/0 | match | match | match |
| 108971 | TruSeqV2    | 15:75045612 | splice   | G/G | 6.66E-16 | 127 | 99 | 32 | 90 | 0/0 | 0/0 | 0/0 | match | match | match |
| 115239 | TruSeqV2    | 15:75045612 | splice   | G/G | 4.44E-16 | 69  | 99 | 18 | 51 | 0/0 | 0/0 | 0/0 | match | match | match |
| 132306 | Agilent38MB | 15:75045612 | splice   | G/G | 4.44E-16 | 76  | 99 | 20 | 59 | 0/0 | 0/0 | 0/0 | match | match | match |
| 163383 | TruSeqV2    | 15:75045612 | splice   | G/G | 1.33E-15 | 112 | 99 | 31 | 78 | 0/0 | 0/0 | 0/0 | match | match | match |
| 198564 | Agilent38MB | 15:75045612 | splice   | G/G | 2.51E-14 | 156 | 99 | 37 | 99 | 0/0 | 0/0 | 0/0 | match | match | match |
| 108971 | TruSeqV2    | 15:75047169 | missense | C/C | 8.88E-16 | 87  | 99 | 46 | 99 | 0/0 | 0/0 | 0/0 | match | match | match |
| 115239 | TruSeqV2    | 15:75047169 | missense | C/C | 6.66E-16 | 71  | 99 | 6  | 12 | 0/0 | 0/0 | 0/0 | match | match | match |
| 132306 | Agilent38MB | 15:75047169 | missense | C/C | 1.11E-15 | 112 | 99 | 31 | 78 | 0/0 | 0/0 | 0/0 | match | match | match |
| 163383 | TruSeqV2    | 15:75047169 | missense | C/C | 6.66E-16 | 62  | 99 | 23 | 69 | 0/0 | 0/0 | 0/0 | match | match | match |
| 198564 | Agilent38MB | 15:75047169 | missense | C/C | 2.00E-15 | 195 | 99 | 32 | 87 | 0/0 | 0/0 | 0/0 | match | match | match |
| 108971 | TruSeqV2    | 15:75047245 | missense | G/G | 6.44E-15 | 134 | 99 | 25 | 60 | 0/0 | 0/0 | 0/0 | match | match | match |
| 115239 | TruSeqV2    | 15:75047245 | missense | G/G | 4.44E-16 | 113 | 99 | 19 | 54 | 0/0 | 0/0 | 0/0 | match | match | match |
| 132306 | Agilent38MB | 15:75047245 | missense | G/G | 2.22E-16 | 166 | 99 | 19 | 57 | 0/0 | 0/0 | 0/0 | match | match | match |
| 163383 | TruSeqV2    | 15:75047245 | missense | G/G | 2.22E-16 | 122 | 99 | 34 | 99 | 0/0 | 0/0 | 0/0 | match | match | match |
| 198564 | Agilent38MB | 15:75047245 | missense | G/G | 8.44E-15 | 294 | 99 | 20 | 57 | 0/0 | 0/0 | 0/0 | match | match | match |
| 108971 | TruSeqV2    | 15:75047426 | synon    | C/T | 6.88E-15 | 57  | 99 | 37 | 99 | 0/1 | 0/1 | 0/1 | match | match | match |
| 115239 | TruSeqV2    | 15:75047426 | synon    | C/T | 1.55E-15 | 29  | 99 | 11 | 97 | 0/1 | 0/1 | 0/1 | match | match | match |
| 132306 | Agilent38MB | 15:75047426 | synon    | C/T | 9.99E-15 | 63  | 99 | 28 | 99 | 0/1 | 0/1 | 0/1 | match | match | match |
| 163383 | TruSeqV2    | 15:75047426 | synon    | C/T | 1.49E-14 | 41  | 99 | 36 | 99 | 0/1 | 0/1 | 0/1 | match | match | match |
| 198564 | Agilent38MB | 15:75047426 | synon    | C/C | 2.18E-14 | 124 | 99 | 39 | 99 | 0/0 | 0/0 | 0/0 | match | match | match |
| 108971 | TruSeqV2    | 15:85431000 | synon    | C/C | 2.44E-15 | 85  | 99 | 43 | 99 | 0/0 | 0/0 | 0/0 | match | match | match |
| 115239 | TruSeqV2    | 15:85431000 | synon    | C/C | 8.88E-16 | 52  | 99 | 28 | 81 | 0/0 | 0/0 | 0/0 | match | match | match |
| 132306 | Agilent38MB | 15:85431000 | synon    | C/C | 1.11E-15 | 136 | 99 | 28 | 72 | 0/0 | 0/0 | 0/0 | match | match | match |
| 163383 | TruSeqV2    | 15:85431000 | synon    | C/C | 8.88E-16 | 78  | 99 | 34 | 90 | 0/0 | 0/0 | 0/0 | match | match | match |
| 198564 | Agilent38MB | 15:85431000 | synon    | C/C | 1.33E-15 | 248 | 99 | 40 | 99 | 0/0 | 0/0 | 0/0 | match | match | match |
| 108971 | TruSeqV2    | 15:85431029 | missense | C/C | 2.22E-15 | 101 | 99 | 45 | 99 | 0/0 | 0/0 | 0/0 | match | match | match |
| 115239 | TruSeqV2    | 15:85431029 | missense | C/C | 7.55E-15 | 78  | 99 | 34 | 93 | 0/0 | 0/0 | 0/0 | match | match | match |
| 132306 | Agilent38MB | 15:85431029 | missense | C/C | 1.33E-15 | 176 | 99 | 29 | 84 | 0/0 | 0/0 | 0/0 | match | match | match |
| 163383 | TruSeqV2    | 15:85431029 | missense | C/C | 2.22E-15 | 88  | 99 | 32 | 84 | 0/0 | 0/0 | 0/0 | match | match | match |
| 198564 | Agilent38MB | 15:85431029 | missense | C/C | 4.22E-15 | 355 | 99 | 39 | 99 | 0/0 | 0/0 | 0/0 | match | match | match |
| 108971 | TruSeqV2    | 15:85432030 | synon    | T/T | 4.45E-13 | 25  | 75 | 33 | 75 | 0/0 | 0/0 | 0/0 | match | match | match |
| 115239 | TruSeqV2    | 15:85432030 | synon    | T/T | 2.06E-12 | 23  | 66 | 14 | 36 | 0/0 | 0/0 | 0/0 | match | match | match |
| 132306 | Agilent38MB | 15:85432030 | synon    | T/T | 1.05E-13 | 5   | 15 | 27 | 75 | 0/0 | 0/0 | 0/0 | match | match | match |

|        |             |             |          |     |          |     |    |    |    |     |     |     |       |       |       |
|--------|-------------|-------------|----------|-----|----------|-----|----|----|----|-----|-----|-----|-------|-------|-------|
| 163383 | TruSeqV2    | 15:85432030 | synon    | T/T | 1.68E-12 | 27  | 78 | 30 | 84 | 0/0 | 0/0 | 0/0 | match | match | match |
| 198564 | Agilent38MB | 15:85432030 | synon    | T/T | 6.23E-10 | 11  | 24 | 22 | 54 | 0/0 | 0/0 | 0/0 | match | match | match |
| 108971 | TruSeqV2    | 15:85432038 | synon    | C/C | 1.33E-15 | 28  | 81 | 31 | 72 | 0/0 | 0/0 | 0/0 | match | match | match |
| 115239 | TruSeqV2    | 15:85432038 | synon    | C/C | 1.78E-15 | 27  | 75 | 14 | 36 | 0/0 | 0/0 | 0/0 | match | match | match |
| 132306 | Agilent38MB | 15:85432038 | synon    | C/C | 1.55E-15 | 7   | 15 | 29 | 72 | 0/0 | 0/0 | 0/0 | match | match | match |
| 163383 | TruSeqV2    | 15:85432038 | synon    | C/C | 8.88E-16 | 27  | 78 | 32 | 95 | 0/0 | 0/0 | 0/0 | match | match | match |
| 198564 | Agilent38MB | 15:85432038 | synon    | C/C | 6.66E-16 | 10  | 24 | 23 | 57 | 0/0 | 0/0 | 0/0 | match | match | match |
| 108971 | TruSeqV2    | 15:85438188 | synon    | C/C | 1.78E-15 | 105 | 99 | 39 | 96 | 0/0 | 0/0 | 0/0 | match | match | match |
| 115239 | TruSeqV2    | 15:85438188 | synon    | C/C | 1.24E-14 | 56  | 99 | 26 | 66 | 0/0 | 0/0 | 0/0 | match | match | match |
| 132306 | Agilent38MB | 15:85438188 | synon    | C/C | 4.44E-16 | 77  | 99 | 35 | 99 | 0/0 | 0/0 | 0/0 | match | match | match |
| 163383 | TruSeqV2    | 15:85438188 | synon    | C/C | 3.33E-15 | 72  | 99 | 28 | 69 | 0/0 | 0/0 | 0/0 | match | match | match |
| 198564 | Agilent38MB | 15:85438188 | synon    | C/C | 1.40E-14 | 128 | 99 | 35 | 93 | 0/0 | 0/0 | 0/0 | match | match | match |
| 108971 | TruSeqV2    | 15:85438281 | missense | C/C | 1.11E-15 | 180 | 99 | 22 | 63 | 0/0 | 0/0 | 0/0 | match | match | match |
| 115239 | TruSeqV2    | 15:85438281 | missense | C/C | 6.66E-16 | 94  | 99 | 12 | 33 | 0/0 | 0/0 | 0/0 | match | match | match |
| 132306 | Agilent38MB | 15:85438281 | missense | C/C | 6.66E-16 | 22  | 54 | 35 | 75 | 0/0 | 0/0 | 0/0 | match | match | match |
| 163383 | TruSeqV2    | 15:85438281 | missense | C/C | 6.66E-16 | 115 | 99 | 24 | 54 | 0/0 | 0/0 | 0/0 | match | match | match |
| 198564 | Agilent38MB | 15:85438281 | missense | C/C | 5.35E-14 | 75  | 99 | 38 | 63 | 0/0 | 0/0 | 0/0 | match | match | match |
| 108971 | TruSeqV2    | 15:85447431 | missense | A/G | 6.79E-13 | 233 | 99 | 41 | 99 | 0/1 | 0/1 | 0/1 | match | match | match |
| 115239 | TruSeqV2    | 15:85447431 | missense | A/G | 2.22E-15 | 157 | 99 | 36 | 99 | 0/1 | 0/1 | 0/1 | match | match | match |
| 132306 | Agilent38MB | 15:85447431 | missense | G/G | 4.44E-15 | 156 | 99 | 40 | 99 | 0/0 | 0/0 | 0/0 | match | match | match |
| 163383 | TruSeqV2    | 15:85447431 | missense | A/G | 4.97E-12 | 157 | 99 | 30 | 99 | 0/1 | 0/1 | 0/1 | match | match | match |
| 198564 | Agilent38MB | 15:85447431 | missense | G/G | 4.66E-15 | 370 | 99 | 38 | 99 | 0/0 | 0/0 | 0/0 | match | match | match |
| 108971 | TruSeqV2    | 15:85447434 | missense | G/G | 3.80E-14 | 233 | 99 | 42 | 99 | 0/0 | 0/0 | 0/0 | match | match | match |
| 115239 | TruSeqV2    | 15:85447434 | missense | G/G | 3.77E-15 | 162 | 99 | 39 | 73 | 0/0 | 0/0 | 0/0 | match | match | match |
| 132306 | Agilent38MB | 15:85447434 | missense | G/G | 8.88E-16 | 164 | 99 | 40 | 93 | 0/0 | 0/0 | 0/0 | match | match | match |
| 163383 | TruSeqV2    | 15:85447434 | missense | G/G | 7.11E-15 | 153 | 99 | 30 | 78 | 0/0 | 0/0 | 0/0 | match | match | match |
| 198564 | Agilent38MB | 15:85447434 | missense | G/G | 8.88E-16 | 382 | 99 | 38 | 99 | 0/0 | 0/0 | 0/0 | match | match | match |
| 108971 | TruSeqV2    | 15:85448796 | synon    | A/A | 2.22E-16 | 105 | 99 | 45 | 99 | 0/0 | 0/0 | 0/0 | match | match | match |
| 115239 | TruSeqV2    | 15:85448796 | synon    | A/A | 2.22E-16 | 64  | 99 | 21 | 8  | 0/0 | 0/0 | 0/0 | match | match | match |
| 132306 | Agilent38MB | 15:85448796 | synon    | A/A | 2.22E-16 | 112 | 99 | 30 | 87 | 0/0 | 0/0 | 0/0 | match | match | match |
| 163383 | TruSeqV2    | 15:85448796 | synon    | A/A | 2.22E-16 | 59  | 99 | 31 | 81 | 0/0 | 0/0 | 0/0 | match | match | match |
| 198564 | Agilent38MB | 15:85448796 | synon    | A/A | 2.00E-15 | 213 | 99 | 51 | 99 | 0/0 | 0/0 | 0/0 | match | match | match |
| 108971 | TruSeqV2    | 15:85448855 | missense | C/C | 4.44E-16 | 105 | 99 | 54 | 99 | 0/0 | 0/0 | 0/0 | match | match | match |
| 115239 | TruSeqV2    | 15:85448855 | missense | C/C | 2.22E-16 | 51  | 99 | 19 | 51 | 0/0 | 0/0 | 0/0 | match | match | match |
| 132306 | Agilent38MB | 15:85448855 | missense | C/C | 2.22E-16 | 87  | 99 | 46 | 91 | 0/0 | 0/0 | 0/0 | match | match | match |
| 163383 | TruSeqV2    | 15:85448855 | missense | C/C | 2.22E-16 | 55  | 99 | 34 | 87 | 0/0 | 0/0 | 0/0 | match | match | match |
| 198564 | Agilent38MB | 15:85448855 | missense | C/C | 2.22E-16 | 184 | 99 | 39 | 99 | 0/0 | 0/0 | 0/0 | match | match | match |
| 108971 | TruSeqV2    | 15:85448875 | missense | A/C | 1.55E-15 | 90  | 99 | 40 | 99 | 0/1 | 0/1 | 0/1 | match | match | match |

|        |             |             |          |     |          |     |    |    |    |     |     |     |       |       |       |
|--------|-------------|-------------|----------|-----|----------|-----|----|----|----|-----|-----|-----|-------|-------|-------|
| 115239 | TruSeqV2    | 15:85448875 | missense | C/C | 2.89E-15 | 35  | 81 | 15 | 42 | 0/0 | 0/0 | 0/0 | match | match | match |
| 132306 | Agilent38MB | 15:85448875 | missense | C/C | 1.11E-15 | 54  | 99 | 37 | 99 | 0/0 | 0/0 | 0/0 | match | match | match |
| 163383 | TruSeqV2    | 15:85448875 | missense | C/C | 8.88E-16 | 52  | 99 | 34 | 81 | 0/0 | 0/0 | 0/0 | match | match | match |
| 198564 | Agilent38MB | 15:85448875 | missense | C/C | 2.00E-15 | 106 | 99 | 29 | 69 | 0/0 | 0/0 | 0/0 | match | match | match |
| 108971 | TruSeqV2    | 15:85467227 | synon    | A/A | 2.22E-16 | 96  | 99 | 39 | 99 | 0/0 | 0/0 | 0/0 | match | match | match |
| 115239 | TruSeqV2    | 15:85467227 | synon    | A/A | 2.22E-16 | 59  | 99 | 32 | 90 | 0/0 | 0/0 | 0/0 | match | match | match |
| 132306 | Agilent38MB | 15:85467227 | synon    | A/A | 2.00E-15 | 83  | 99 | 41 | 99 | 0/0 | 0/0 | 0/0 | match | match | match |
| 163383 | TruSeqV2    | 15:85467227 | synon    | A/A | 6.66E-16 | 75  | 99 | 41 | 99 | 0/0 | 0/0 | 0/0 | match | match | match |
| 198564 | Agilent38MB | 15:85467227 | synon    | A/A | 4.44E-16 | 157 | 99 | 39 | 98 | 0/0 | 0/0 | 0/0 | match | match | match |
| 108971 | TruSeqV2    | 15:85467275 | synon    | C/C | 4.44E-16 | 151 | 99 | 45 | 99 | 0/0 | 0/0 | 0/0 | match | match | match |
| 115239 | TruSeqV2    | 15:85467275 | synon    | C/T | 1.11E-15 | 82  | 99 | 32 | 99 | 0/1 | 0/1 | 0/1 | match | match | match |
| 132306 | Agilent38MB | 15:85467275 | synon    | C/C | 4.44E-16 | 121 | 99 | 44 | 99 | 0/0 | 0/0 | 0/0 | match | match | match |
| 163383 | TruSeqV2    | 15:85467275 | synon    | C/C | 4.44E-16 | 102 | 99 | 50 | 99 | 0/0 | 0/0 | 0/0 | match | match | match |
| 198564 | Agilent38MB | 15:85467275 | synon    | C/C | 4.44E-16 | 228 | 99 | 43 | 99 | 0/0 | 0/0 | 0/0 | match | match | match |
| 108971 | TruSeqV2    | 15:85476390 | synon    | G/G | 1.78E-15 | 184 | 99 | 45 | 99 | 0/0 | 0/0 | 0/0 | match | match | match |
| 115239 | TruSeqV2    | 15:85476390 | synon    | G/G | 2.22E-16 | 139 | 99 | 16 | 36 | 0/0 | 0/0 | 0/0 | match | match | match |
| 132306 | Agilent38MB | 15:85476390 | synon    | G/G | 4.44E-16 | 402 | 99 | 30 | 69 | 0/0 | 0/0 | 0/0 | match | match | match |
| 163383 | TruSeqV2    | 15:85476390 | synon    | G/G | 8.88E-16 | 160 | 99 | 30 | 89 | 0/0 | 0/0 | 0/0 | match | match | match |
| 198564 | Agilent38MB | 15:85476390 | synon    | G/G | 7.55E-15 | 740 | 99 | 45 | 99 | 0/0 | 0/0 | 0/0 | match | match | match |
| 108971 | TruSeqV2    | 15:85476441 | synon    | G/G | 1.55E-15 | 251 | 99 | 47 | 99 | 0/0 | 0/0 | 0/0 | match | match | match |
| 115239 | TruSeqV2    | 15:85476441 | synon    | A/G | 6.66E-16 | 170 | 99 | 16 | 99 | 0/1 | 0/1 | 0/1 | match | match | match |
| 132306 | Agilent38MB | 15:85476441 | synon    | A/G | 2.00E-15 | 178 | 99 | 31 | 99 | 0/1 | 0/1 | 0/1 | match | match | match |
| 163383 | TruSeqV2    | 15:85476441 | synon    | A/G | 6.66E-16 | 197 | 99 | 37 | 99 | 0/1 | 0/1 | 0/1 | match | match | match |
| 198564 | Agilent38MB | 15:85476441 | synon    | G/G | 1.33E-15 | 337 | 99 | 32 | 87 | 0/0 | 0/0 | 0/0 | match | match | match |
| 108971 | TruSeqV2    | 15:85476489 | synon    | A/A | 9.31E-11 | 214 | 99 | 48 | 99 | 0/0 | 0/0 | 0/0 | match | match | match |
| 115239 | TruSeqV2    | 15:85476489 | synon    | A/A | 1.24E-13 | 137 | 99 | 20 | 28 | 0/0 | 0/0 | 0/0 | match | match | match |
| 132306 | Agilent38MB | 15:85476489 | synon    | A/A | 6.98E-13 | 65  | 99 | 27 | 69 | 0/0 | 0/0 | 0/0 | match | match | match |
| 163383 | TruSeqV2    | 15:85476489 | synon    | A/A | 2.19E-13 | 180 | 99 | 38 | 99 | 0/0 | 0/0 | 0/0 | match | match | match |
| 198564 | Agilent38MB | 15:85476489 | synon    | A/A | 6.60E-13 | 125 | 99 | 50 | 99 | 0/0 | 0/0 | 0/0 | match | match | match |
| 108971 | TruSeqV2    | 15:85478276 | missense | G/G | 3.33E-15 | 100 | 99 | 46 | 99 | 0/0 | 0/0 | 0/0 | match | match | match |
| 115239 | TruSeqV2    | 15:85478276 | missense | G/G | 2.22E-16 | 64  | 99 | 18 | 48 | 0/0 | 0/0 | 0/0 | match | match | match |
| 132306 | Agilent38MB | 15:85478276 | missense | G/G | 4.44E-16 | 156 | 99 | 32 | 84 | 0/0 | 0/0 | 0/0 | match | match | match |
| 163383 | TruSeqV2    | 15:85478276 | missense | G/G | 1.33E-15 | 69  | 99 | 41 | 99 | 0/0 | 0/0 | 0/0 | match | match | match |
| 198564 | Agilent38MB | 15:85478276 | missense | G/G | 4.00E-15 | 280 | 99 | 39 | 99 | 0/0 | 0/0 | 0/0 | match | match | match |
| 108971 | TruSeqV2    | 15:85478410 | synon    | A/G | 3.75E-14 | 144 | 99 | 26 | 99 | 0/1 | 0/1 | 0/1 | match | match | match |
| 115239 | TruSeqV2    | 15:85478410 | synon    | A/G | 2.49E-14 | 96  | 99 | 23 | 99 | 0/1 | 0/1 | 0/1 | match | match | match |
| 132306 | Agilent38MB | 15:85478410 | synon    | G/G | 4.44E-16 | 122 | 99 | 30 | 89 | 1/1 | 1/1 | 1/1 | match | match | match |
| 163383 | TruSeqV2    | 15:85478410 | synon    | A/G | 6.22E-15 | 102 | 99 | 27 | 99 | 0/1 | 0/1 | 0/1 | match | match | match |

|        |             |             |          |     |          |     |    |    |    |     |     |     |       |       |       |
|--------|-------------|-------------|----------|-----|----------|-----|----|----|----|-----|-----|-----|-------|-------|-------|
| 198564 | Agilent38MB | 15:85478410 | synon    | G/G | 2.44E-15 | 259 | 99 | 24 | 72 | 1/1 | 1/1 | 1/1 | match | match | match |
| 108971 | TruSeqV2    | 15:85478573 | synon    | C/C | 5.51E-14 | 118 | 99 | 36 | 99 | 0/0 | 0/0 | 0/0 | match | match | match |
| 115239 | TruSeqV2    | 15:85478573 | synon    | C/C | 2.22E-15 | 69  | 99 | 22 | 63 | 0/0 | 0/0 | 0/0 | match | match | match |
| 132306 | Agilent38MB | 15:85478573 | synon    | C/C | 1.64E-14 | 88  | 99 | 37 | 99 | 0/0 | 0/0 | 0/0 | match | match | match |
| 163383 | TruSeqV2    | 15:85478573 | synon    | C/C | 6.57E-14 | 92  | 99 | 36 | 78 | 0/0 | 0/0 | 0/0 | match | match | match |
| 198564 | Agilent38MB | 15:85478573 | synon    | C/C | 4.55E-13 | 161 | 99 | 52 | 99 | 0/0 | 0/0 | 0/0 | match | match | match |
| 108971 | TruSeqV2    | 15:85478729 | missense | A/G | 2.91E-09 | 67  | 99 | 33 | 99 | 0/1 | 0/1 | 0/1 | match | match | match |
| 115239 | TruSeqV2    | 15:85478729 | missense | G/G | 6.15E-14 | 42  | 90 | 17 | 39 | 0/0 | 0/0 | 0/0 | match | match | match |
| 132306 | Agilent38MB | 15:85478729 | missense | A/G | 4.69E-14 | 160 | 99 | 26 | 99 | 0/1 | 0/1 | 0/1 | match | match | match |
| 163383 | TruSeqV2    | 15:85478729 | missense | G/G | 3.18E-14 | 59  | 99 | 29 | 78 | 0/0 | 0/0 | 0/0 | match | match | match |
| 198564 | Agilent38MB | 15:85478729 | missense | A/A | 6.74E-05 | 300 | 99 | 30 | 80 | 1/1 | 1/1 | 1/1 | match | match | match |
| 108971 | TruSeqV2    | 15:85486730 | missense | T/T | 2.22E-16 | 120 | 99 | 32 | 87 | 0/0 | 0/0 | 0/0 | match | match | match |
| 115239 | TruSeqV2    | 15:85486730 | missense | T/T | 4.44E-16 | 79  | 99 | 28 | 75 | 0/0 | 0/0 | 0/0 | match | match | match |
| 132306 | Agilent38MB | 15:85486730 | missense | T/T | 2.22E-16 | 135 | 99 | 28 | 78 | 0/0 | 0/0 | 0/0 | match | match | match |
| 163383 | TruSeqV2    | 15:85486730 | missense | T/T | 2.22E-16 | 104 | 99 | 24 | 66 | 0/0 | 0/0 | 0/0 | match | match | match |
| 198564 | Agilent38MB | 15:85486730 | missense | T/T | 6.66E-16 | 245 | 99 | 40 | 99 | 0/0 | 0/0 | 0/0 | match | match | match |
| 108971 | TruSeqV2    | 15:85488045 | synon    | C/C | 4.44E-16 | 208 | 99 | 33 | 84 | 0/0 | 0/0 | 0/0 | match | match | match |
| 115239 | TruSeqV2    | 15:85488045 | synon    | C/C | 2.22E-16 | 155 | 99 | 21 | 51 | 0/0 | 0/0 | 0/0 | match | match | match |
| 132306 | Agilent38MB | 15:85488045 | synon    | C/C | 8.88E-16 | 50  | 99 | 30 | 87 | 0/0 | 0/0 | 0/0 | match | match | match |
| 163383 | TruSeqV2    | 15:85488045 | synon    | C/C | 1.11E-15 | 160 | 99 | 33 | 65 | 0/0 | 0/0 | 0/0 | match | match | match |
| 198564 | Agilent38MB | 15:85488045 | synon    | C/C | 1.11E-15 | 74  | 99 | 45 | 99 | 0/0 | 0/0 | 0/0 | match | match | match |
| 108971 | TruSeqV2    | 15:85488361 | missense | A/A | 6.66E-16 | 90  | 99 | 40 | 99 | 0/0 | 0/0 | 0/0 | match | match | match |
| 115239 | TruSeqV2    | 15:85488361 | missense | A/A | 2.22E-16 | 86  | 99 | 27 | 69 | 0/0 | 0/0 | 0/0 | match | match | match |
| 132306 | Agilent38MB | 15:85488361 | missense | A/A | 6.66E-16 | 50  | 99 | 24 | 63 | 0/0 | 0/0 | 0/0 | match | match | match |
| 163383 | TruSeqV2    | 15:85488361 | missense | A/A | 2.22E-16 | 75  | 99 | 39 | 99 | 0/0 | 0/0 | 0/0 | match | match | match |
| 198564 | Agilent38MB | 15:85488361 | missense | A/A | 4.44E-16 | 102 | 99 | 38 | 99 | 0/0 | 0/0 | 0/0 | match | match | match |
| 108971 | TruSeqV2    | 15:85488384 | missense | C/C | 2.22E-16 | 112 | 99 | 39 | 99 | 0/0 | 0/0 | 0/0 | match | match | match |
| 115239 | TruSeqV2    | 15:85488384 | missense | C/C | 2.22E-16 | 100 | 99 | 27 | 75 | 0/0 | 0/0 | 0/0 | match | match | match |
| 132306 | Agilent38MB | 15:85488384 | missense | C/C | 2.00E-15 | 68  | 99 | 26 | 75 | 0/0 | 0/0 | 0/0 | match | match | match |
| 163383 | TruSeqV2    | 15:85488384 | missense | C/C | 4.44E-16 | 106 | 99 | 41 | 99 | 0/0 | 0/0 | 0/0 | match | match | match |
| 198564 | Agilent38MB | 15:85488384 | missense | C/C | 4.44E-16 | 132 | 99 | 35 | 75 | 0/0 | 0/0 | 0/0 | match | match | match |
| 108971 | TruSeqV2    | 15:85488439 | 3'UTR    | A/A | 9.99E-15 | 236 | 99 | 45 | 99 | 0/0 | 0/0 | 0/0 | match | match | match |
| 115239 | TruSeqV2    | 15:85488439 | 3'UTR    | A/A | 2.66E-15 | 149 | 99 | 28 | 69 | 0/0 | 0/0 | 0/0 | match | match | match |
| 132306 | Agilent38MB | 15:85488439 | 3'UTR    | A/A | 1.11E-15 | 45  | 99 | 30 | 78 | 0/0 | 0/0 | 0/0 | match | match | match |
| 163383 | TruSeqV2    | 15:85488439 | 3'UTR    | A/A | 6.66E-16 | 202 | 99 | 34 | 84 | 0/0 | 0/0 | 0/0 | match | match | match |
| 198564 | Agilent38MB | 15:85488439 | 3'UTR    | A/A | 6.66E-16 | 104 | 99 | 39 | 99 | 0/0 | 0/0 | 0/0 | match | match | match |
| 108971 | TruSeqV2    | 15:85488456 | 3'UTR    | C/C | 2.44E-15 | 245 | 99 | 42 | 93 | 0/0 | 0/0 | 0/0 | match | match | match |
| 115239 | TruSeqV2    | 15:85488456 | 3'UTR    | C/C | 1.80E-14 | 171 | 99 | 24 | 66 | 0/0 | 0/0 | 0/0 | match | match | match |



|        |             |             |          |     |          |     |    |    |    |     |     |     |       |       |       |
|--------|-------------|-------------|----------|-----|----------|-----|----|----|----|-----|-----|-----|-------|-------|-------|
| 132306 | Agilent38MB | 15:85488456 | 3'UTR    | C/C | 2.66E-15 | 32  | 69 | 29 | 69 | 0/0 | 0/0 | 0/0 | match | match | match |
| 163383 | TruSeqV2    | 15:85488456 | 3'UTR    | C/C | 1.89E-14 | 208 | 99 | 27 | 75 | 0/0 | 0/0 | 0/0 | match | match | match |
| 198564 | Agilent38MB | 15:85488456 | 3'UTR    | C/C | 9.41E-14 | 74  | 99 | 32 | 81 | 0/0 | 0/0 | 0/0 | match | match | match |
| 108971 | TruSeqV2    | 15:85488572 | 3'UTR    | G/T | 7.11E-15 | 158 | 99 | 30 | 99 | 0/1 | 0/1 | 0/1 | match | match | match |
| 115239 | TruSeqV2    | 15:85488572 | 3'UTR    | G/T | 6.22E-14 | 115 | 99 | 29 | 99 | 0/1 | 0/1 | 0/1 | match | match | match |
| 163383 | TruSeqV2    | 15:85488572 | 3'UTR    | G/T | 4.88E-15 | 122 | 99 | 30 | 99 | 0/1 | 0/1 | 0/1 | match | match | match |
| 198564 | Agilent38MB | 15:85488572 | 3'UTR    | G/G | 2.58E-14 | 3   | 9  | 34 | 99 | 1/1 | 1/1 | 1/1 | match | match | match |
| 108971 | TruSeqV2    | 15:92647645 | missense | C/G | 8.88E-16 | 127 | 99 | 50 | 99 | 0/1 | 0/1 | 0/1 | match | match | match |
| 115239 | TruSeqV2    | 15:92647645 | missense | C/C | 2.22E-16 | 77  | 99 | 21 | 63 | 1/1 | 1/1 | 1/1 | match | match | match |
| 132306 | Agilent38MB | 15:92647645 | missense | C/G | 1.55E-15 | 74  | 99 | 33 | 99 | 0/1 | 0/1 | 0/1 | match | match | match |
| 163383 | TruSeqV2    | 15:92647645 | missense | C/C | 2.22E-16 | 105 | 99 | 35 | 77 | 1/1 | 1/1 | 1/1 | match | match | match |
| 198564 | Agilent38MB | 15:92647645 | missense | C/C | 2.22E-16 | 153 | 99 | 39 | 99 | 1/1 | 1/1 | 1/1 | match | match | match |
| 108971 | TruSeqV2    | 15:92698643 | intronic | C/C | 8.88E-16 | 2   | 6  | 37 | 99 | 1/1 | 1/1 | 1/1 | match | match | match |
| 108971 | TruSeqV2    | 16:1272820  | fs       | -/- | 5.76E-11 | 130 | 99 | 43 | 99 | 0/0 | 0/0 | 0/0 | match | match | match |
| 115239 | TruSeqV2    | 16:1272820  | fs       | -/- | 1.07E-11 | 130 | 99 | 43 | 99 | 0/0 | 0/0 | 0/0 | match | match | match |
| 132306 | Agilent38MB | 16:1272820  | fs       | -/- | 6.17E-12 | 130 | 99 | 43 | 99 | 0/0 | 0/0 | 0/0 | match | match | match |
| 163383 | TruSeqV2    | 16:1272820  | fs       | -/- | 9.05E-09 | 130 | 99 | 43 | 99 | 0/0 | 0/0 | 0/0 | match | match | match |
| 198564 | Agilent38MB | 16:1272820  | fs       | -/- | 6.93E-07 | 130 | 99 | 43 | 99 | 0/0 | 0/0 | 0/0 | match | match | match |
| 108971 | TruSeqV2    | 16:1273803  | intronic | C/C | 1.84E-14 | 21  | 54 | 18 | 54 | 0/0 | 0/0 | 0/0 | match | match | match |
| 115239 | TruSeqV2    | 16:1273803  | intronic | C/C | 2.84E-07 | 21  | 60 | 16 | 42 | 0/0 | 0/0 | 0/0 | match | match | match |
| 163383 | TruSeqV2    | 16:1273803  | intronic | T/C | 3.11E-15 | 28  | 99 | 24 | 99 | 0/1 | 0/1 | 0/1 | match | match | match |
| 198564 | Agilent38MB | 16:1273803  | intronic | C/C | 1.81E-09 | 1   | 3  | 18 | 36 | 0/0 | 0/0 | 0/0 | match | match | match |
| 108971 | TruSeqV2    | 16:16103682 | missense | C/C | 1.10E-07 | 167 | 99 | 42 | 99 | 0/0 | 0/0 | 0/0 | match | match | match |
| 132306 | Agilent38MB | 16:16103682 | missense | C/C | 1.90E-08 | 58  | 99 | 28 | 81 | 0/0 | 0/0 | 0/0 | match | match | match |
| 163383 | TruSeqV2    | 16:16103682 | missense | C/C | 3.45E-10 | 137 | 99 | 25 | 57 | 0/0 | 0/0 | 0/0 | match | match | match |
| 198564 | Agilent38MB | 16:16103682 | missense | C/C | 1.67E-05 | 131 | 99 | 32 | 95 | 0/0 | 0/0 | 0/0 | match | match | match |
| 108971 | TruSeqV2    | 16:16130340 | missense | G/G | 1.11E-15 | 189 | 99 | 31 | 93 | 0/0 | 0/0 | 0/0 | match | match | match |
| 115239 | TruSeqV2    | 16:16130340 | missense | G/G | 4.44E-16 | 132 | 99 | 8  | 15 | 0/0 | 0/0 | 0/0 | match | match | match |
| 132306 | Agilent38MB | 16:16130340 | missense | G/G | 6.66E-16 | 70  | 99 | 32 | 87 | 0/0 | 0/0 | 0/0 | match | match | match |
| 163383 | TruSeqV2    | 16:16130340 | missense | G/G | 2.22E-16 | 126 | 99 | 32 | 78 | 0/0 | 0/0 | 0/0 | match | match | match |
| 198564 | Agilent38MB | 16:16130340 | missense | G/G | 2.22E-16 | 157 | 99 | 32 | 84 | 0/0 | 0/0 | 0/0 | match | match | match |
| 108971 | TruSeqV2    | 16:16138322 | synon    | T/T | 1.29E-14 | 66  | 99 | 32 | 93 | 0/0 | 0/0 | 0/0 | match | match | match |
| 115239 | TruSeqV2    | 16:16138322 | synon    | C/T | 1.33E-15 | 41  | 99 | 14 | 99 | 0/1 | 0/1 | 0/1 | match | match | match |
| 132306 | Agilent38MB | 16:16138322 | synon    | T/T | 2.22E-15 | 27  | 72 | 31 | 81 | 0/0 | 0/0 | 0/0 | match | match | match |
| 163383 | TruSeqV2    | 16:16138322 | synon    | T/T | 1.78E-15 | 52  | 99 | 42 | 99 | 0/0 | 0/0 | 0/0 | match | match | match |
| 198564 | Agilent38MB | 16:16138322 | synon    | T/T | 1.49E-14 | 50  | 99 | 30 | 78 | 0/0 | 0/0 | 0/0 | match | match | match |
| 108971 | TruSeqV2    | 16:16139709 | missense | G/G | 3.29E-14 | 61  | 99 | 35 | 96 | 0/0 | 0/0 | 0/0 | match | match | match |
| 115239 | TruSeqV2    | 16:16139709 | missense | G/G | 1.33E-15 | 49  | 99 | 23 | 69 | 0/0 | 0/0 | 0/0 | match | match | match |

|        |             |             |          |     |          |     |    |    |    |     |     |     |       |       |       |
|--------|-------------|-------------|----------|-----|----------|-----|----|----|----|-----|-----|-----|-------|-------|-------|
| 132306 | Agilent38MB | 16:16139709 | missense | G/G | 2.44E-15 | 87  | 99 | 31 | 81 | 0/0 | 0/0 | 0/0 | match | match | match |
| 163383 | TruSeqV2    | 16:16139709 | missense | G/G | 8.88E-16 | 56  | 99 | 34 | 93 | 0/0 | 0/0 | 0/0 | match | match | match |
| 198564 | Agilent38MB | 16:16139709 | missense | G/G | 8.88E-16 | 155 | 99 | 44 | 99 | 0/0 | 0/0 | 0/0 | match | match | match |
| 108971 | TruSeqV2    | 16:16139720 | synon    | G/G | 1.55E-15 | 73  | 99 | 33 | 84 | 0/0 | 0/0 | 0/0 | match | match | match |
| 115239 | TruSeqV2    | 16:16139720 | synon    | G/G | 2.22E-16 | 60  | 99 | 26 | 72 | 0/0 | 0/0 | 0/0 | match | match | match |
| 132306 | Agilent38MB | 16:16139720 | synon    | G/G | 4.44E-16 | 87  | 99 | 32 | 87 | 0/0 | 0/0 | 0/0 | match | match | match |
| 163383 | TruSeqV2    | 16:16139720 | synon    | G/G | 2.22E-16 | 65  | 99 | 35 | 93 | 0/0 | 0/0 | 0/0 | match | match | match |
| 198564 | Agilent38MB | 16:16139720 | synon    | G/G | 2.22E-16 | 169 | 99 | 38 | 93 | 0/0 | 0/0 | 0/0 | match | match | match |
| 108971 | TruSeqV2    | 16:16142079 | missense | G/G | 4.44E-16 | 162 | 99 | 44 | 85 | 0/0 | 0/0 | 0/0 | match | match | match |
| 115239 | TruSeqV2    | 16:16142079 | missense | G/G | 4.44E-16 | 109 | 99 | 32 | 84 | 0/0 | 0/0 | 0/0 | match | match | match |
| 132306 | Agilent38MB | 16:16142079 | missense | G/G | 2.22E-16 | 130 | 99 | 32 | 84 | 0/0 | 0/0 | 0/0 | match | match | match |
| 163383 | TruSeqV2    | 16:16142079 | missense | G/G | 4.44E-16 | 136 | 99 | 33 | 99 | 0/0 | 0/0 | 0/0 | match | match | match |
| 198564 | Agilent38MB | 16:16142079 | missense | G/G | 8.88E-16 | 266 | 99 | 31 | 84 | 0/0 | 0/0 | 0/0 | match | match | match |
| 108971 | TruSeqV2    | 16:16150052 | fs/miss  | A/A | 1.38E-14 | 91  | 99 | 26 | 75 | 0/0 | 0/0 | 0/0 | match | match | match |
| 115239 | TruSeqV2    | 16:16150052 | fs/miss  | A/A | 6.66E-16 | 91  | 99 | 26 | 75 | 0/0 | 0/0 | 0/0 | match | match | match |
| 132306 | Agilent38MB | 16:16150052 | fs/miss  | A/A | 3.55E-15 | 91  | 99 | 26 | 75 | 0/0 | 0/0 | 0/0 | match | match | match |
| 163383 | TruSeqV2    | 16:16150052 | fs/miss  | A/A | 4.66E-15 | 91  | 99 | 26 | 75 | 0/0 | 0/0 | 0/0 | match | match | match |
| 198564 | Agilent38MB | 16:16150052 | fs/miss  | A/A | 4.02E-14 | 91  | 99 | 26 | 75 | 0/0 | 0/0 | 0/0 | match | match | match |
| 108971 | TruSeqV2    | 16:16162039 | synon    | C/C | 2.22E-16 | 141 | 99 | 31 | 87 | 0/0 | 0/0 | 0/0 | match | match | match |
| 115239 | TruSeqV2    | 16:16162039 | synon    | C/C | 2.22E-16 | 86  | 99 | 32 | 87 | 0/0 | 0/0 | 0/0 | match | match | match |
| 132306 | Agilent38MB | 16:16162039 | synon    | C/C | 2.22E-16 | 185 | 99 | 29 | 87 | 0/0 | 0/0 | 0/0 | match | match | match |
| 163383 | TruSeqV2    | 16:16162039 | synon    | C/C | 4.44E-16 | 96  | 99 | 31 | 90 | 0/0 | 0/0 | 0/0 | match | match | match |
| 198564 | Agilent38MB | 16:16162039 | synon    | T/T | 1.12E-13 | 285 | 99 | 36 | 99 | 1/1 | 1/1 | 1/1 | match | match | match |
| 108971 | TruSeqV2    | 16:16165585 | synon    | C/C | 4.44E-16 | 133 | 99 | 34 | 96 | 0/0 | 0/0 | 0/0 | match | match | match |
| 115239 | TruSeqV2    | 16:16165585 | synon    | C/C | 2.22E-16 | 97  | 99 | 22 | 63 | 0/0 | 0/0 | 0/0 | match | match | match |
| 132306 | Agilent38MB | 16:16165585 | synon    | C/C | 4.44E-16 | 41  | 93 | 31 | 90 | 0/0 | 0/0 | 0/0 | match | match | match |
| 163383 | TruSeqV2    | 16:16165585 | synon    | C/C | 2.22E-16 | 100 | 99 | 33 | 87 | 0/0 | 0/0 | 0/0 | match | match | match |
| 198564 | Agilent38MB | 16:16165585 | synon    | C/C | 2.22E-16 | 76  | 99 | 29 | 81 | 0/0 | 0/0 | 0/0 | match | match | match |
| 108971 | TruSeqV2    | 16:16173221 | synon    | C/C | 4.06E-12 | 95  | 99 | 50 | 99 | 0/0 | 0/0 | 0/0 | match | match | match |
| 115239 | TruSeqV2    | 16:16173221 | synon    | C/C | 2.76E-12 | 59  | 99 | 15 | 39 | 0/0 | 0/0 | 0/0 | match | match | match |
| 132306 | Agilent38MB | 16:16173221 | synon    | C/T | 6.74E-13 | 157 | 99 | 37 | 99 | 0/1 | 0/1 | 0/1 | match | match | match |
| 163383 | TruSeqV2    | 16:16173221 | synon    | C/C | 5.96E-13 | 85  | 99 | 36 | 70 | 0/0 | 0/0 | 0/0 | match | match | match |
| 198564 | Agilent38MB | 16:16173221 | synon    | C/C | 4.55E-14 | 251 | 99 | 36 | 96 | 0/0 | 0/0 | 0/0 | match | match | match |
| 108971 | TruSeqV2    | 16:16173227 | synon    | C/C | 6.66E-16 | 103 | 99 | 54 | 99 | 0/0 | 0/0 | 0/0 | match | match | match |
| 115239 | TruSeqV2    | 16:16173227 | synon    | C/C | 1.11E-15 | 68  | 99 | 15 | 39 | 0/0 | 0/0 | 0/0 | match | match | match |
| 132306 | Agilent38MB | 16:16173227 | synon    | C/C | 2.22E-15 | 150 | 99 | 41 | 99 | 0/0 | 0/0 | 0/0 | match | match | match |
| 163383 | TruSeqV2    | 16:16173227 | synon    | C/C | 4.44E-16 | 88  | 99 | 39 | 99 | 0/0 | 0/0 | 0/0 | match | match | match |
| 198564 | Agilent38MB | 16:16173227 | synon    | C/C | 4.44E-16 | 250 | 99 | 39 | 99 | 0/0 | 0/0 | 0/0 | match | match | match |

|        |             |             |          |     |          |     |    |    |    |     |     |     |       |       |       |
|--------|-------------|-------------|----------|-----|----------|-----|----|----|----|-----|-----|-----|-------|-------|-------|
| 108971 | TruSeqV2    | 16:16177275 | missense | G/G | 2.46E-10 | 170 | 99 | 44 | 99 | 0/0 | 0/0 | 0/0 | match | match | match |
| 115239 | TruSeqV2    | 16:16177275 | missense | G/G | 3.49E-11 | 82  | 99 | 31 | 69 | 0/0 | 0/0 | 0/0 | match | match | match |
| 132306 | Agilent38MB | 16:16177275 | missense | G/G | 1.79E-10 | 86  | 99 | 24 | 69 | 0/0 | 0/0 | 0/0 | match | match | match |
| 163383 | TruSeqV2    | 16:16177275 | missense | G/G | 1.45E-11 | 108 | 99 | 56 | 99 | 0/0 | 0/0 | 0/0 | match | match | match |
| 198564 | Agilent38MB | 16:16177275 | missense | G/G | 2.13E-11 | 170 | 99 | 59 | 99 | 0/0 | 0/0 | 0/0 | match | match | match |
| 108971 | TruSeqV2    | 16:16215891 | synon    | G/G | 2.22E-16 | 57  | 99 | 30 | 81 | 0/0 | 0/0 | 0/0 | match | match | match |
| 115239 | TruSeqV2    | 16:16215891 | synon    | G/G | 2.22E-16 | 43  | 99 | 13 | 26 | 0/0 | 0/0 | 0/0 | match | match | match |
| 132306 | Agilent38MB | 16:16215891 | synon    | G/G | 2.22E-16 | 70  | 99 | 27 | 75 | 0/0 | 0/0 | 0/0 | match | match | match |
| 163383 | TruSeqV2    | 16:16215891 | synon    | G/G | 2.22E-16 | 59  | 99 | 36 | 99 | 0/0 | 0/0 | 0/0 | match | match | match |
| 198564 | Agilent38MB | 16:16215891 | synon    | G/G | 2.22E-16 | 160 | 99 | 28 | 78 | 0/0 | 0/0 | 0/0 | match | match | match |
| 108971 | TruSeqV2    | 16:16230411 | missense | C/C | 5.11E-15 | 65  | 99 | 46 | 99 | 0/0 | 0/0 | 0/0 | match | match | match |
| 115239 | TruSeqV2    | 16:16230411 | missense | C/C | 6.66E-16 | 42  | 99 | 38 | 99 | 0/0 | 0/0 | 0/0 | match | match | match |
| 132306 | Agilent38MB | 16:16230411 | missense | C/C | 6.66E-16 | 73  | 99 | 38 | 99 | 0/0 | 0/0 | 0/0 | match | match | match |
| 163383 | TruSeqV2    | 16:16230411 | missense | C/C | 4.44E-16 | 52  | 99 | 37 | 78 | 0/0 | 0/0 | 0/0 | match | match | match |
| 198564 | Agilent38MB | 16:16230411 | missense | C/C | 4.44E-16 | 133 | 99 | 29 | 81 | 0/0 | 0/0 | 0/0 | match | match | match |
| 108971 | TruSeqV2    | 16:16236004 | 3'UTR    | A/T | 3.33E-15 | 152 | 99 | 28 | 99 | 0/1 | 0/1 | 0/1 | match | match | match |
| 115239 | TruSeqV2    | 16:16236004 | 3'UTR    | A/T | 2.00E-15 | 118 | 99 | 32 | 99 | 0/1 | 0/1 | 0/1 | match | match | match |
| 163383 | TruSeqV2    | 16:16236004 | 3'UTR    | A/T | 5.77E-15 | 112 | 99 | 19 | 99 | 0/1 | 0/1 | 0/1 | match | match | match |
| 108971 | TruSeqV2    | 16:16236431 | 3'UTR    | A/G | 1.78E-15 | 131 | 99 | 51 | 99 | 0/1 | 0/1 | 0/1 | match | match | match |
| 115239 | TruSeqV2    | 16:16236431 | 3'UTR    | G/G | 8.88E-16 | 78  | 99 | 48 | 93 | 0/0 | 0/0 | 0/0 | match | match | match |
| 163383 | TruSeqV2    | 16:16236431 | 3'UTR    | G/G | 4.44E-16 | 124 | 99 | 34 | 78 | 0/0 | 0/0 | 0/0 | match | match | match |
| 108971 | TruSeqV2    | 16:16236523 | 3'UTR    | G/G | 4.44E-16 | 104 | 99 | 52 | 99 | 1/1 | 1/1 | 1/1 | match | match | match |
| 115239 | TruSeqV2    | 16:16236523 | 3'UTR    | G/G | 2.22E-16 | 87  | 99 | 46 | 99 | 1/1 | 1/1 | 1/1 | match | match | match |
| 163383 | TruSeqV2    | 16:16236523 | 3'UTR    | G/G | 4.44E-16 | 124 | 99 | 38 | 90 | 1/1 | 1/1 | 1/1 | match | match | match |
| 108971 | TruSeqV2    | 16:16236650 | 3'UTR    | T/T | 2.00E-15 | 191 | 99 | 35 | 78 | 0/0 | 0/0 | 0/0 | match | match | match |
| 115239 | TruSeqV2    | 16:16236650 | 3'UTR    | T/T | 8.88E-16 | 128 | 99 | 21 | 0  | 0/0 | 0/0 | 0/0 | match | match | match |
| 163383 | TruSeqV2    | 16:16236650 | 3'UTR    | C/T | 5.33E-15 | 174 | 99 | 32 | 99 | 0/1 | 0/1 | 0/1 | match | match | match |
| 108971 | TruSeqV2    | 16:16251599 | missense | C/C | 1.11E-15 | 98  | 99 | 56 | 99 | 0/0 | 0/0 | 0/0 | match | match | match |
| 115239 | TruSeqV2    | 16:16251599 | missense | T/C | 7.99E-15 | 70  | 99 | 27 | 99 | 0/1 | 0/1 | 0/1 | match | match | match |
| 132306 | Agilent38MB | 16:16251599 | missense | T/C | 3.55E-15 | 52  | 99 | 35 | 99 | 0/1 | 0/1 | 0/1 | match | match | match |
| 163383 | TruSeqV2    | 16:16251599 | missense | C/C | 1.78E-15 | 110 | 99 | 40 | 99 | 0/0 | 0/0 | 0/0 | match | match | match |
| 198564 | Agilent38MB | 16:16251599 | missense | C/C | 1.11E-15 | 123 | 99 | 47 | 99 | 0/0 | 0/0 | 0/0 | match | match | match |
| 108971 | TruSeqV2    | 16:16263663 | synon    | G/G | 2.66E-15 | 111 | 99 | 26 | 66 | 0/0 | 0/0 | 0/0 | match | match | match |
| 115239 | TruSeqV2    | 16:16263663 | synon    | G/G | 1.55E-15 | 49  | 99 | 15 | 42 | 0/0 | 0/0 | 0/0 | match | match | match |
| 132306 | Agilent38MB | 16:16263663 | synon    | G/A | 2.46E-14 | 6   | 53 | 27 | 99 | 0/1 | 0/1 | 0/1 | match | match | match |
| 163383 | TruSeqV2    | 16:16263663 | synon    | G/A | 1.53E-14 | 84  | 99 | 34 | 99 | 0/1 | 0/1 | 0/1 | match | match | match |
| 198564 | Agilent38MB | 16:16263663 | synon    | G/G | 1.73E-14 | 12  | 33 | 30 | 81 | 0/0 | 0/0 | 0/0 | match | match | match |
| 108971 | TruSeqV2    | 16:16271357 | missense | C/C | 2.22E-16 | 133 | 99 | 45 | 99 | 1/1 | 1/1 | 1/1 | match | match | match |

|        |             |             |          |     |          |     |    |    |    |     |     |     |       |       |       |
|--------|-------------|-------------|----------|-----|----------|-----|----|----|----|-----|-----|-----|-------|-------|-------|
| 115239 | TruSeqV2    | 16:16271357 | missense | C/C | 1.11E-15 | 100 | 99 | 11 | 33 | 1/1 | 1/1 | 1/1 | match | match | match |
| 132306 | Agilent38MB | 16:16271357 | missense | C/C | 2.22E-16 | 58  | 99 | 37 | 99 | 1/1 | 1/1 | 1/1 | match | match | match |
| 163383 | TruSeqV2    | 16:16271357 | missense | C/C | 6.66E-16 | 98  | 99 | 30 | 90 | 1/1 | 1/1 | 1/1 | match | match | match |
| 198564 | Agilent38MB | 16:16271357 | missense | C/C | 6.66E-16 | 106 | 99 | 30 | 89 | 1/1 | 1/1 | 1/1 | match | match | match |
| 108971 | TruSeqV2    | 16:16272670 | synon    | C/C | 2.44E-15 | 70  | 99 | 38 | 99 | 1/1 | 1/1 | 1/1 | match | match | match |
| 115239 | TruSeqV2    | 16:16272670 | synon    | C/C | 7.42E-14 | 39  | 99 | 26 | 78 | 1/1 | 1/1 | 1/1 | match | match | match |
| 132306 | Agilent38MB | 16:16272670 | synon    | C/C | 1.11E-15 | 34  | 99 | 40 | 99 | 1/1 | 1/1 | 1/1 | match | match | match |
| 163383 | TruSeqV2    | 16:16272670 | synon    | C/C | 1.78E-15 | 67  | 99 | 37 | 99 | 1/1 | 1/1 | 1/1 | match | match | match |
| 198564 | Agilent38MB | 16:16272670 | synon    | C/C | 2.66E-15 | 84  | 99 | 23 | 69 | 1/1 | 1/1 | 1/1 | match | match | match |
| 108971 | TruSeqV2    | 16:16276737 | missense | A/A | 6.66E-16 | 5   | 15 | 31 | 90 | 0/0 | 0/0 | 0/0 | match | match | match |
| 115239 | TruSeqV2    | 16:16276737 | missense | A/A | 4.44E-16 | 6   | 15 | 19 | 57 | 0/0 | 0/0 | 0/0 | match | match | match |
| 132306 | Agilent38MB | 16:16276737 | missense | A/A | 2.22E-16 | 109 | 99 | 40 | 99 | 0/0 | 0/0 | 0/0 | match | match | match |
| 198564 | Agilent38MB | 16:16276737 | missense | A/A | 4.44E-16 | 208 | 99 | 38 | 96 | 0/0 | 0/0 | 0/0 | match | match | match |
| 108971 | TruSeqV2    | 16:16278863 | missense | G/G | 2.02E-14 | 102 | 99 | 43 | 99 | 0/0 | 0/0 | 0/0 | match | match | match |
| 115239 | TruSeqV2    | 16:16278863 | missense | T/T | 7.99E-15 | 58  | 99 | 25 | 78 | 1/1 | 1/1 | 1/1 | match | match | match |
| 132306 | Agilent38MB | 16:16278863 | missense | T/G | 4.25E-13 | 38  | 99 | 31 | 99 | 0/1 | 0/1 | 0/1 | match | match | match |
| 163383 | TruSeqV2    | 16:16278863 | missense | G/G | 1.55E-15 | 94  | 99 | 35 | 90 | 0/0 | 0/0 | 0/0 | match | match | match |
| 198564 | Agilent38MB | 16:16278863 | missense | T/G | 2.31E-12 | 107 | 99 | 29 | 99 | 0/1 | 0/1 | 0/1 | match | match | match |
| 108971 | TruSeqV2    | 16:16278869 | synon    | G/G | 5.55E-15 | 101 | 99 | 40 | 99 | 0/0 | 0/0 | 0/0 | match | match | match |
| 115239 | TruSeqV2    | 16:16278869 | synon    | C/C | 5.33E-15 | 55  | 99 | 26 | 78 | 1/1 | 1/1 | 1/1 | match | match | match |
| 132306 | Agilent38MB | 16:16278869 | synon    | G/C | 2.00E-15 | 37  | 99 | 32 | 99 | 0/1 | 0/1 | 0/1 | match | match | match |
| 163383 | TruSeqV2    | 16:16278869 | synon    | G/G | 2.00E-15 | 91  | 99 | 34 | 90 | 0/0 | 0/0 | 0/0 | match | match | match |
| 198564 | Agilent38MB | 16:16278869 | synon    | G/C | 8.88E-16 | 102 | 99 | 27 | 99 | 0/1 | 0/1 | 0/1 | match | match | match |
| 108971 | TruSeqV2    | 16:28602991 | synon    | A/G | 1.79E-13 | 138 | 99 | 34 | 99 | 0/1 | 0/1 | 0/1 | match | match | match |
| 115239 | TruSeqV2    | 16:28602991 | synon    | A/A | 8.00E-07 | 120 | 99 | 18 | 51 | 0/0 | 0/0 | 0/0 | match | match | match |
| 132306 | Agilent38MB | 16:28602991 | synon    | A/A | 1.99E-08 | 40  | 99 | 33 | 87 | 0/0 | 0/0 | 0/0 | match | match | match |
| 163383 | TruSeqV2    | 16:28602991 | synon    | A/A | 1.23E-06 | 129 | 99 | 33 | 87 | 0/0 | 0/0 | 0/0 | match | match | match |
| 198564 | Agilent38MB | 16:28602991 | synon    | A/G | 4.44E-15 | 120 | 99 | 34 | 99 | 0/1 | 0/1 | 0/1 | match | match | match |
| 108971 | TruSeqV2    | 16:28603643 | missense | T/T | 3.02E-14 | 130 | 99 | 50 | 99 | 0/0 | 0/0 | 0/0 | match | match | match |
| 115239 | TruSeqV2    | 16:28603643 | missense | T/T | 1.78E-15 | 79  | 99 | 16 | 45 | 0/0 | 0/0 | 0/0 | match | match | match |
| 132306 | Agilent38MB | 16:28603643 | missense | T/T | 4.77E-13 | 321 | 99 | 41 | 99 | 0/0 | 0/0 | 0/0 | match | match | match |
| 163383 | TruSeqV2    | 16:28603643 | missense | T/T | 9.99E-14 | 80  | 99 | 38 | 99 | 0/0 | 0/0 | 0/0 | match | match | match |
| 198564 | Agilent38MB | 16:28603643 | missense | T/T | 1.44E-14 | 649 | 99 | 54 | 99 | 0/0 | 0/0 | 0/0 | match | match | match |
| 108971 | TruSeqV2    | 16:28603655 | missense | T/G | 8.32E-07 | 130 | 99 | 49 | 99 | 0/1 | 0/1 | 0/1 | match | match | match |
| 115239 | TruSeqV2    | 16:28603655 | missense | T/G | 6.27E-12 | 73  | 99 | 17 | 99 | 0/1 | 0/1 | 0/1 | match | match | match |
| 198564 | Agilent38MB | 16:28603655 | missense | T/G | 3.35E-05 | 592 | 99 | 57 | 99 | 0/1 | 0/1 | 0/1 | match | match | match |
| 115239 | TruSeqV2    | 16:28607196 | missense | G/G | 2.22E-15 | 216 | 99 | 2  | 6  | 0/0 | 0/0 | 0/0 | match | match | match |
| 132306 | Agilent38MB | 16:28607196 | missense | G/G | 6.66E-15 | 19  | 51 | 20 | 48 | 0/0 | 0/0 | 0/0 | match | match | match |

|        |             |             |                |     |          |     |    |    |    |     |     |     |       |       |       |
|--------|-------------|-------------|----------------|-----|----------|-----|----|----|----|-----|-----|-----|-------|-------|-------|
| 163383 | TruSeqV2    | 16:28607196 | missense       | G/G | 6.88E-15 | 186 | 99 | 29 | 75 | 0/0 | 0/0 | 0/0 | match | match | match |
| 198564 | Agilent38MB | 16:28607196 | missense       | G/G | 4.44E-16 | 130 | 99 | 31 | 81 | 0/0 | 0/0 | 0/0 | match | match | match |
| 163383 | TruSeqV2    | 16:28607232 | missense       | G/G | 2.66E-15 | 116 | 68 | 12 | 36 | 1/1 | 1/1 | 1/1 | match | match | match |
| 108971 | TruSeqV2    | 16:28617485 | missense       | T/T | 4.44E-16 | 60  | 99 | 28 | 84 | 1/1 | 1/1 | 1/1 | match | match | match |
| 132306 | Agilent38MB | 16:28617485 | missense       | T/T | 4.44E-16 | 160 | 99 | 33 | 99 | 1/1 | 1/1 | 1/1 | match | match | match |
| 163383 | TruSeqV2    | 16:28617485 | missense       | T/T | 4.44E-16 | 39  | 99 | 23 | 69 | 1/1 | 1/1 | 1/1 | match | match | match |
| 198564 | Agilent38MB | 16:28617485 | missense       | T/T | 6.66E-16 | 337 | 99 | 50 | 99 | 1/1 | 1/1 | 1/1 | match | match | match |
| 108971 | TruSeqV2    | 16:28617514 | missense       | T/C | 3.78E-08 | 57  | 99 | 22 | 99 | 0/1 | 0/1 | 0/1 | match | match | match |
| 132306 | Agilent38MB | 16:28617514 | missense       | T/T | 2.76E-13 | 94  | 99 | 27 | 80 | 1/1 | 1/1 | 1/1 | match | match | match |
| 163383 | TruSeqV2    | 16:28617514 | missense       | T/T | 1.15E-13 | 37  | 99 | 17 | 49 | 1/1 | 1/1 | 1/1 | match | match | match |
| 198564 | Agilent38MB | 16:28617514 | missense       | T/C | 9.74E-11 | 260 | 99 | 45 | 99 | 0/1 | 0/1 | 0/1 | match | match | match |
| 108971 | TruSeqV2    | 16:28620067 | missense       | C/C | 2.04E-14 | 454 | 99 | 41 | 99 | 0/0 | 0/0 | 0/0 | match | match | match |
| 115239 | TruSeqV2    | 16:28620067 | missense       | C/C | 1.95E-13 | 291 | 99 | 5  | 6  | 0/0 | 0/0 | 0/0 | match | match | match |
| 198564 | Agilent38MB | 16:28620067 | missense       | C/C | 8.88E-16 | 292 | 99 | 62 | 99 | 0/0 | 0/0 | 0/0 | match | match | match |
| 108971 | TruSeqV2    | 16:29473201 | alternate exon | C/C | 2.22E-16 | 2   | 6  | 10 | 27 | 0/0 | 0/0 | 0/0 | match | match | match |
| 132306 | Agilent38MB | 16:29473201 | alternate exon | C/C | 1.33E-15 | 2   | 5  | 6  | 18 | 0/0 | 0/0 | 0/0 | match | match | match |
| 163383 | TruSeqV2    | 16:29473201 | alternate exon | C/C | 2.22E-16 | 1   | 3  | 3  | 9  | 0/0 | 0/0 | 0/0 | match | match | match |
| 132306 | Agilent38MB | 16:29656093 | intronic       | C/C | 1.89E-12 | 1   | 3  | 38 | 99 | 0/0 | 0/0 | 0/0 | match | match | match |
| 132306 | Agilent38MB | 16:29661217 | intronic       | C/C | 8.93E-14 | 4   | 12 | 33 | 87 | 0/0 | 0/0 | 0/0 | match | match | match |
| 115239 | TruSeqV2    | 16:29668253 | promoter       | G/G | 1.33E-15 | 1   | 3  | 22 | 57 | 0/0 | 0/0 | 0/0 | match | match | match |
| 198564 | Agilent38MB | 16:29668253 | promoter       | G/G | 2.46E-11 | 2   | 6  | 34 | 84 | 0/0 | 0/0 | 0/0 | match | match | match |
| 108971 | TruSeqV2    | 16:29747291 | Intergenic     | T/T | 2.22E-15 | 1   | 3  | 34 | 87 | 0/0 | 0/0 | 0/0 | match | match | match |
| 108971 | TruSeqV2    | 16:30212544 | missense       | C/C | 2.22E-16 | 1   | 3  | 12 | 36 | 0/0 | 0/0 | 0/0 | match | match | match |
| 108971 | TruSeqV2    | 16:31099011 | missense       | T/T | 4.49E-09 | 166 | 99 | 42 | 99 | 0/0 | 0/0 | 0/0 | match | match | match |
| 115239 | TruSeqV2    | 16:31099011 | missense       | T/T | 7.67E-08 | 92  | 99 | 14 | 36 | 0/0 | 0/0 | 0/0 | match | match | match |
| 132306 | Agilent38MB | 16:31099011 | missense       | T/T | 2.63E-08 | 17  | 51 | 24 | 63 | 0/0 | 0/0 | 0/0 | match | match | match |
| 163383 | TruSeqV2    | 16:31099011 | missense       | T/T | 9.49E-08 | 109 | 99 | 34 | 87 | 0/0 | 0/0 | 0/0 | match | match | match |
| 198564 | Agilent38MB | 16:31099011 | missense       | T/T | 3.16E-05 | 24  | 66 | 32 | 87 | 0/0 | 0/0 | 0/0 | match | match | match |
| 108971 | TruSeqV2    | 16:31102321 | 3'UTR          | T/C | 6.58E-09 | 262 | 99 | 30 | 99 | 0/1 | 0/1 | 0/1 | match | match | match |
| 115239 | TruSeqV2    | 16:31102321 | 3'UTR          | T/C | 7.42E-11 | 182 | 99 | 17 | 99 | 0/1 | 0/1 | 0/1 | match | match | match |
| 163383 | TruSeqV2    | 16:31102321 | 3'UTR          | C/C | 1.13E-14 | 237 | 99 | 29 | 78 | 0/0 | 0/0 | 0/0 | match | match | match |
| 198564 | Agilent38MB | 16:31102321 | 3'UTR          | C/C | 2.00E-15 | 7   | 18 | 34 | 90 | 0/0 | 0/0 | 0/0 | match | match | match |
| 108971 | TruSeqV2    | 16:31102324 | 3'UTR          | G/G | 1.26E-13 | 263 | 99 | 35 | 72 | 0/0 | 0/0 | 0/0 | match | match | match |
| 115239 | TruSeqV2    | 16:31102324 | 3'UTR          | G/G | 6.22E-15 | 182 | 99 | 22 | 54 | 0/0 | 0/0 | 0/0 | match | match | match |
| 132306 | Agilent38MB | 16:31102324 | 3'UTR          | G/G | 1.03E-13 | 4   | 12 | 26 | 66 | 0/0 | 0/0 | 0/0 | match | match | match |
| 163383 | TruSeqV2    | 16:31102324 | 3'UTR          | G/G | 2.33E-13 | 232 | 99 | 32 | 81 | 0/0 | 0/0 | 0/0 | match | match | match |
| 198564 | Agilent38MB | 16:31102324 | 3'UTR          | G/G | 1.04E-14 | 6   | 12 | 33 | 75 | 0/0 | 0/0 | 0/0 | match | match | match |
| 108971 | TruSeqV2    | 16:31102564 | missense       | A/A | 2.22E-16 | 308 | 99 | 44 | 99 | 0/0 | 0/0 | 0/0 | match | match | match |

|        |             |             |          |     |          |     |    |    |    |     |     |     |       |       |       |
|--------|-------------|-------------|----------|-----|----------|-----|----|----|----|-----|-----|-----|-------|-------|-------|
| 115239 | TruSeqV2    | 16:31102564 | missense | A/A | 4.44E-16 | 226 | 99 | 39 | 99 | 0/0 | 0/0 | 0/0 | match | match | match |
| 132306 | Agilent38MB | 16:31102564 | missense | A/A | 2.22E-16 | 100 | 99 | 36 | 99 | 0/0 | 0/0 | 0/0 | match | match | match |
| 163383 | TruSeqV2    | 16:31102564 | missense | A/A | 4.44E-16 | 268 | 99 | 44 | 99 | 0/0 | 0/0 | 0/0 | match | match | match |
| 198564 | Agilent38MB | 16:31102564 | missense | A/A | 1.55E-15 | 191 | 99 | 48 | 99 | 0/0 | 0/0 | 0/0 | match | match | match |
| 108971 | TruSeqV2    | 16:31102589 | synon    | G/G | 6.66E-16 | 226 | 99 | 40 | 99 | 0/0 | 0/0 | 0/0 | match | match | match |
| 115239 | TruSeqV2    | 16:31102589 | synon    | G/G | 1.11E-15 | 174 | 99 | 36 | 67 | 0/0 | 0/0 | 0/0 | match | match | match |
| 132306 | Agilent38MB | 16:31102589 | synon    | G/G | 6.66E-16 | 87  | 99 | 34 | 84 | 0/0 | 0/0 | 0/0 | match | match | match |
| 163383 | TruSeqV2    | 16:31102589 | synon    | G/G | 6.66E-16 | 212 | 99 | 36 | 84 | 0/0 | 0/0 | 0/0 | match | match | match |
| 198564 | Agilent38MB | 16:31102589 | synon    | G/G | 1.11E-15 | 167 | 99 | 36 | 93 | 0/0 | 0/0 | 0/0 | match | match | match |
| 108971 | TruSeqV2    | 16:31102655 | missense | G/G | 1.11E-15 | 118 | 99 | 29 | 69 | 0/0 | 0/0 | 0/0 | match | match | match |
| 115239 | TruSeqV2    | 16:31102655 | missense | G/G | 4.44E-16 | 76  | 99 | 33 | 72 | 0/0 | 0/0 | 0/0 | match | match | match |
| 132306 | Agilent38MB | 16:31102655 | missense | G/G | 4.44E-16 | 24  | 51 | 35 | 99 | 0/0 | 0/0 | 0/0 | match | match | match |
| 163383 | TruSeqV2    | 16:31102655 | missense | G/G | 4.44E-16 | 90  | 99 | 39 | 99 | 0/0 | 0/0 | 0/0 | match | match | match |
| 198564 | Agilent38MB | 16:31102655 | missense | G/G | 1.33E-15 | 67  | 99 | 38 | 99 | 0/0 | 0/0 | 0/0 | match | match | match |
| 198564 | Agilent38MB | 16:31103796 | intronic | A/A | 3.21E-13 | 6   | 18 | 45 | 99 | 0/0 | 0/0 | 0/0 | match | match | match |
| 198564 | Agilent38MB | 16:31104402 | intronic | C/C | 1.44E-14 | 1   | 3  | 48 | 99 | 0/0 | 0/0 | 0/0 | match | match | match |
| 132306 | Agilent38MB | 16:31104447 | intronic | A/A | 4.44E-16 | 3   | 9  | 20 | 48 | 0/0 | 0/0 | 0/0 | match | match | match |
| 198564 | Agilent38MB | 16:31104447 | intronic | A/A | 1.33E-15 | 1   | 3  | 37 | 99 | 0/0 | 0/0 | 0/0 | match | match | match |
| 132306 | Agilent38MB | 16:31104509 | intronic | G/C | 7.33E-15 | 8   | 81 | 16 | 99 | 0/1 | 0/1 | 0/1 | match | match | match |
| 198564 | Agilent38MB | 16:31104509 | intronic | G/G | 1.11E-15 | 4   | 12 | 27 | 80 | 1/1 | 1/1 | 1/1 | match | match | match |
| 108971 | TruSeqV2    | 16:31104720 | missense | C/C | 4.44E-16 | 25  | 63 | 31 | 78 | 0/0 | 0/0 | 0/0 | match | match | match |
| 115239 | TruSeqV2    | 16:31104720 | missense | C/C | 4.44E-16 | 20  | 54 | 24 | 51 | 0/0 | 0/0 | 0/0 | match | match | match |
| 132306 | Agilent38MB | 16:31104720 | missense | C/C | 1.11E-15 | 161 | 99 | 32 | 75 | 0/0 | 0/0 | 0/0 | match | match | match |
| 163383 | TruSeqV2    | 16:31104720 | missense | C/C | 4.44E-16 | 24  | 60 | 39 | 87 | 0/0 | 0/0 | 0/0 | match | match | match |
| 198564 | Agilent38MB | 16:31104720 | missense | C/C | 4.44E-16 | 244 | 99 | 25 | 66 | 0/0 | 0/0 | 0/0 | match | match | match |
| 163383 | TruSeqV2    | 16:31104878 | intronic | G/A | 2.66E-15 | 4   | 29 | 21 | 99 | 0/1 | 0/1 | 0/1 | match | match | match |
| 198564 | Agilent38MB | 16:31104878 | intronic | A/A | 1.11E-15 | 6   | 18 | 16 | 48 | 1/1 | 1/1 | 1/1 | match | match | match |
| 198564 | Agilent38MB | 16:31105353 | intronic | G/G | 6.44E-15 | 2   | 6  | 19 | 54 | 0/0 | 0/0 | 0/0 | match | match | match |
| 198564 | Agilent38MB | 16:31105392 | intronic | G/G | 8.88E-16 | 1   | 3  | 25 | 60 | 0/0 | 0/0 | 0/0 | match | match | match |
| 132306 | Agilent38MB | 16:31105554 | intronic | A/A | 2.29E-14 | 2   | 3  | 21 | 63 | 0/0 | 0/0 | 0/0 | match | match | match |
| 108971 | TruSeqV2    | 16:31105879 | missense | T/T | 2.66E-15 | 10  | 30 | 19 | 51 | 0/0 | 0/0 | 0/0 | match | match | match |
| 115239 | TruSeqV2    | 16:31105879 | missense | T/T | 1.33E-15 | 2   | 6  | 3  | 6  | 0/0 | 0/0 | 0/0 | match | match | match |
| 132306 | Agilent38MB | 16:31105879 | missense | T/T | 1.78E-15 | 12  | 36 | 17 | 50 | 0/0 | 0/0 | 0/0 | match | match | match |
| 163383 | TruSeqV2    | 16:31105879 | missense | T/T | 2.89E-15 | 2   | 6  | 16 | 45 | 0/0 | 0/0 | 0/0 | match | match | match |
| 198564 | Agilent38MB | 16:31105879 | missense | T/T | 4.44E-16 | 21  | 48 | 46 | 99 | 0/0 | 0/0 | 0/0 | match | match | match |
| 108971 | TruSeqV2    | 16:31105917 | missense | A/A | 1.27E-08 | 12  | 33 | 26 | 69 | 0/0 | 0/0 | 0/0 | match | match | match |
| 115239 | TruSeqV2    | 16:31105917 | missense | A/A | 4.43E-12 | 6   | 18 | 7  | 0  | 0/0 | 0/0 | 0/0 | match | match | match |
| 132306 | Agilent38MB | 16:31105917 | missense | A/A | 1.28E-09 | 11  | 30 | 19 | 48 | 0/0 | 0/0 | 0/0 | match | match | match |

|        |             |             |          |     |          |     |    |    |    |     |     |     |       |       |       |
|--------|-------------|-------------|----------|-----|----------|-----|----|----|----|-----|-----|-----|-------|-------|-------|
| 163383 | TruSeqV2    | 16:31105917 | missense | A/A | 5.56E-10 | 5   | 12 | 28 | 72 | 0/0 | 0/0 | 0/0 | match | match | match |
| 198564 | Agilent38MB | 16:31105917 | missense | A/A | 9.96E-09 | 20  | 39 | 41 | 99 | 0/0 | 0/0 | 0/0 | match | match | match |
| 108971 | TruSeqV2    | 16:31105966 | missense | C/C | 9.98E-09 | 15  | 45 | 33 | 96 | 0/0 | 0/0 | 0/0 | match | match | match |
| 115239 | TruSeqV2    | 16:31105966 | missense | C/C | 4.44E-07 | 8   | 24 | 7  | 21 | 0/0 | 0/0 | 0/0 | match | match | match |
| 132306 | Agilent38MB | 16:31105966 | missense | C/C | 4.53E-08 | 17  | 48 | 18 | 51 | 0/0 | 0/0 | 0/0 | match | match | match |
| 163383 | TruSeqV2    | 16:31105966 | missense | C/C | 3.81E-08 | 8   | 24 | 33 | 93 | 0/0 | 0/0 | 0/0 | match | match | match |
| 198564 | Agilent38MB | 16:31105966 | missense | C/C | 1.32E-06 | 16  | 45 | 36 | 84 | 0/0 | 0/0 | 0/0 | match | match | match |
| 198564 | Agilent38MB | 16:66970561 | intronic | A/A | 1.27E-14 | 2   | 6  | 35 | 93 | 0/0 | 0/0 | 0/0 | match | match | match |
| 108971 | TruSeqV2    | 16:66971963 | missense | C/C | 6.66E-16 | 108 | 99 | 41 | 99 | 0/0 | 0/0 | 0/0 | match | match | match |
| 115239 | TruSeqV2    | 16:66971963 | missense | C/C | 4.22E-15 | 66  | 99 | 29 | 69 | 0/0 | 0/0 | 0/0 | match | match | match |
| 132306 | Agilent38MB | 16:66971963 | missense | C/C | 2.22E-15 | 86  | 99 | 34 | 84 | 0/0 | 0/0 | 0/0 | match | match | match |
| 163383 | TruSeqV2    | 16:66971963 | missense | C/C | 3.55E-15 | 82  | 99 | 37 | 96 | 0/0 | 0/0 | 0/0 | match | match | match |
| 198564 | Agilent38MB | 16:66971963 | missense | C/C | 6.66E-16 | 154 | 99 | 29 | 78 | 0/0 | 0/0 | 0/0 | match | match | match |
| 108971 | TruSeqV2    | 16:66974125 | missense | G/G | 8.88E-16 | 72  | 99 | 21 | 48 | 0/0 | 0/0 | 0/0 | match | match | match |
| 115239 | TruSeqV2    | 16:66974125 | missense | G/G | 1.11E-15 | 46  | 99 | 30 | 84 | 0/0 | 0/0 | 0/0 | match | match | match |
| 132306 | Agilent38MB | 16:66974125 | missense | G/G | 6.66E-16 | 75  | 99 | 21 | 60 | 0/0 | 0/0 | 0/0 | match | match | match |
| 163383 | TruSeqV2    | 16:66974125 | missense | G/G | 6.66E-16 | 53  | 99 | 26 | 66 | 0/0 | 0/0 | 0/0 | match | match | match |
| 198564 | Agilent38MB | 16:66974125 | missense | G/G | 9.99E-15 | 135 | 99 | 21 | 48 | 0/0 | 0/0 | 0/0 | match | match | match |
| 108971 | TruSeqV2    | 16:66976006 | splice   | A/A | 2.22E-16 | 122 | 99 | 31 | 90 | 0/0 | 0/0 | 0/0 | match | match | match |
| 115239 | TruSeqV2    | 16:66976006 | splice   | A/A | 4.44E-16 | 82  | 99 | 29 | 78 | 0/0 | 0/0 | 0/0 | match | match | match |
| 132306 | Agilent38MB | 16:66976006 | splice   | A/A | 2.22E-16 | 34  | 93 | 20 | 54 | 0/0 | 0/0 | 0/0 | match | match | match |
| 163383 | TruSeqV2    | 16:66976006 | splice   | A/A | 2.22E-16 | 74  | 99 | 36 | 90 | 0/0 | 0/0 | 0/0 | match | match | match |
| 198564 | Agilent38MB | 16:66976006 | splice   | A/A | 2.89E-15 | 69  | 99 | 38 | 99 | 0/0 | 0/0 | 0/0 | match | match | match |
| 108971 | TruSeqV2    | 16:66977114 | intronic | C/C | 4.44E-16 | 172 | 99 | 37 | 99 | 0/0 | 0/0 | 0/0 | match | match | match |
| 115239 | TruSeqV2    | 16:66977114 | intronic | C/C | 1.78E-15 | 123 | 99 | 22 | 66 | 0/0 | 0/0 | 0/0 | match | match | match |
| 132306 | Agilent38MB | 16:66977114 | intronic | C/C | 8.88E-16 | 13  | 39 | 34 | 90 | 0/0 | 0/0 | 0/0 | match | match | match |
| 163383 | TruSeqV2    | 16:66977114 | intronic | C/C | 1.78E-15 | 136 | 99 | 35 | 84 | 0/0 | 0/0 | 0/0 | match | match | match |
| 198564 | Agilent38MB | 16:66977114 | intronic | C/C | 3.77E-15 | 31  | 58 | 27 | 81 | 0/0 | 0/0 | 0/0 | match | match | match |
| 108971 | TruSeqV2    | 16:69743760 | 3'UTR    | G/G | 2.22E-16 | 62  | 99 | 40 | 99 | 1/1 | 1/1 | 1/1 | match | match | match |
| 115239 | TruSeqV2    | 16:69743760 | 3'UTR    | G/G | 2.22E-16 | 65  | 99 | 42 | 99 | 1/1 | 1/1 | 1/1 | match | match | match |
| 163383 | TruSeqV2    | 16:69743760 | 3'UTR    | G/G | 2.22E-16 | 75  | 99 | 37 | 99 | 1/1 | 1/1 | 1/1 | match | match | match |
| 108971 | TruSeqV2    | 16:69744747 | 3'UTR    | A/A | 6.66E-16 | 88  | 99 | 63 | 99 | 0/0 | 0/0 | 0/0 | match | match | match |
| 115239 | TruSeqV2    | 16:69744747 | 3'UTR    | A/A | 2.22E-16 | 70  | 99 | 48 | 99 | 0/0 | 0/0 | 0/0 | match | match | match |
| 132306 | Agilent38MB | 16:69744747 | 3'UTR    | A/A | 6.66E-16 | 5   | 15 | 47 | 99 | 0/0 | 0/0 | 0/0 | match | match | match |
| 163383 | TruSeqV2    | 16:69744747 | 3'UTR    | A/A | 4.44E-16 | 78  | 99 | 39 | 99 | 0/0 | 0/0 | 0/0 | match | match | match |
| 198564 | Agilent38MB | 16:69744747 | 3'UTR    | A/A | 3.33E-15 | 3   | 9  | 52 | 99 | 0/0 | 0/0 | 0/0 | match | match | match |
| 108971 | TruSeqV2    | 16:69744774 | 3'UTR    | T/T | 6.66E-16 | 82  | 99 | 64 | 99 | 0/0 | 0/0 | 0/0 | match | match | match |
| 115239 | TruSeqV2    | 16:69744774 | 3'UTR    | T/T | 4.44E-15 | 51  | 99 | 45 | 99 | 0/0 | 0/0 | 0/0 | match | match | match |

|        |             |             |          |     |          |     |    |    |    |     |     |     |       |       |       |
|--------|-------------|-------------|----------|-----|----------|-----|----|----|----|-----|-----|-----|-------|-------|-------|
| 132306 | Agilent38MB | 16:69744774 | 3'UTR    | T/T | 3.13E-14 | 8   | 21 | 49 | 99 | 0/0 | 0/0 | 0/0 | match | match | match |
| 163383 | TruSeqV2    | 16:69744774 | 3'UTR    | T/T | 1.33E-15 | 69  | 99 | 37 | 99 | 0/0 | 0/0 | 0/0 | match | match | match |
| 198564 | Agilent38MB | 16:69744774 | 3'UTR    | T/T | 8.88E-16 | 9   | 24 | 49 | 99 | 0/0 | 0/0 | 0/0 | match | match | match |
| 108971 | TruSeqV2    | 16:69744855 | 3'UTR    | G/G | 6.66E-16 | 71  | 99 | 47 | 99 | 0/0 | 0/0 | 0/0 | match | match | match |
| 115239 | TruSeqV2    | 16:69744855 | 3'UTR    | G/G | 1.11E-15 | 50  | 99 | 44 | 99 | 0/0 | 0/0 | 0/0 | match | match | match |
| 132306 | Agilent38MB | 16:69744855 | 3'UTR    | G/G | 4.44E-16 | 129 | 99 | 34 | 93 | 0/0 | 0/0 | 0/0 | match | match | match |
| 163383 | TruSeqV2    | 16:69744855 | 3'UTR    | G/G | 6.00E-15 | 39  | 99 | 41 | 99 | 0/0 | 0/0 | 0/0 | match | match | match |
| 198564 | Agilent38MB | 16:69744855 | 3'UTR    | G/G | 4.86E-14 | 174 | 99 | 44 | 99 | 0/0 | 0/0 | 0/0 | match | match | match |
| 108971 | TruSeqV2    | 16:69745145 | missense | G/G | 6.66E-16 | 6   | 18 | 57 | 99 | 0/0 | 0/0 | 0/0 | match | match | match |
| 132306 | Agilent38MB | 16:69745145 | missense | G/G | 1.33E-15 | 52  | 99 | 39 | 99 | 0/0 | 0/0 | 0/0 | match | match | match |
| 163383 | TruSeqV2    | 16:69745145 | missense | G/G | 1.55E-15 | 12  | 0  | 36 | 87 | 0/0 | 0/0 | 0/0 | match | match | match |
| 198564 | Agilent38MB | 16:69745145 | missense | G/G | 1.60E-14 | 118 | 99 | 36 | 93 | 0/0 | 0/0 | 0/0 | match | match | match |
| 108971 | TruSeqV2    | 16:69748869 | missense | G/G | 6.66E-16 | 170 | 99 | 28 | 72 | 0/0 | 0/0 | 0/0 | match | match | match |
| 115239 | TruSeqV2    | 16:69748869 | missense | G/G | 8.22E-15 | 117 | 99 | 35 | 99 | 0/0 | 0/0 | 0/0 | match | match | match |
| 132306 | Agilent38MB | 16:69748869 | missense | G/G | 4.44E-16 | 66  | 99 | 35 | 99 | 0/0 | 0/0 | 0/0 | match | match | match |
| 163383 | TruSeqV2    | 16:69748869 | missense | G/G | 5.33E-15 | 131 | 99 | 38 | 99 | 0/0 | 0/0 | 0/0 | match | match | match |
| 198564 | Agilent38MB | 16:69748869 | missense | G/G | 1.11E-15 | 88  | 99 | 43 | 99 | 0/0 | 0/0 | 0/0 | match | match | match |
| 108971 | TruSeqV2    | 16:69752373 | synon    | C/C | 4.44E-15 | 193 | 99 | 30 | 87 | 0/0 | 0/0 | 0/0 | match | match | match |
| 115239 | TruSeqV2    | 16:69752373 | synon    | C/C | 6.66E-16 | 131 | 99 | 28 | 78 | 0/0 | 0/0 | 0/0 | match | match | match |
| 132306 | Agilent38MB | 16:69752373 | synon    | C/C | 4.00E-15 | 87  | 99 | 27 | 55 | 0/0 | 0/0 | 0/0 | match | match | match |
| 163383 | TruSeqV2    | 16:69752373 | synon    | C/C | 2.66E-15 | 177 | 99 | 31 | 84 | 0/0 | 0/0 | 0/0 | match | match | match |
| 198564 | Agilent38MB | 16:69752373 | synon    | C/C | 2.44E-15 | 173 | 99 | 34 | 81 | 0/0 | 0/0 | 0/0 | match | match | match |
| 108971 | TruSeqV2    | 16:71560153 | 5'UTR    | T/T | 3.88E-12 | 310 | 99 | 42 | 99 | 0/0 | 0/0 | 0/0 | match | match | match |
| 115239 | TruSeqV2    | 16:71560153 | 5'UTR    | T/T | 2.54E-12 | 151 | 99 | 47 | 99 | 0/0 | 0/0 | 0/0 | match | match | match |
| 163383 | TruSeqV2    | 16:71560153 | 5'UTR    | T/T | 3.55E-15 | 221 | 99 | 41 | 99 | 0/0 | 0/0 | 0/0 | match | match | match |
| 108971 | TruSeqV2    | 16:71570992 | missense | T/T | 1.55E-15 | 170 | 99 | 32 | 78 | 0/0 | 0/0 | 0/0 | match | match | match |
| 115239 | TruSeqV2    | 16:71570992 | missense | T/T | 6.66E-16 | 122 | 99 | 19 | 54 | 0/0 | 0/0 | 0/0 | match | match | match |
| 132306 | Agilent38MB | 16:71570992 | missense | T/T | 8.88E-16 | 37  | 90 | 21 | 57 | 0/0 | 0/0 | 0/0 | match | match | match |
| 163383 | TruSeqV2    | 16:71570992 | missense | T/T | 8.88E-16 | 141 | 99 | 29 | 69 | 0/0 | 0/0 | 0/0 | match | match | match |
| 198564 | Agilent38MB | 16:71570992 | missense | T/T | 7.33E-15 | 77  | 99 | 32 | 73 | 0/0 | 0/0 | 0/0 | match | match | match |
| 108971 | TruSeqV2    | 16:71571663 | missense | C/C | 2.66E-15 | 254 | 99 | 36 | 96 | 0/0 | 0/0 | 0/0 | match | match | match |
| 115239 | TruSeqV2    | 16:71571663 | missense | C/C | 8.88E-16 | 168 | 99 | 23 | 60 | 0/0 | 0/0 | 0/0 | match | match | match |
| 132306 | Agilent38MB | 16:71571663 | missense | C/C | 4.44E-16 | 63  | 99 | 33 | 84 | 0/0 | 0/0 | 0/0 | match | match | match |
| 163383 | TruSeqV2    | 16:71571663 | missense | C/C | 9.77E-15 | 204 | 99 | 31 | 84 | 0/0 | 0/0 | 0/0 | match | match | match |
| 198564 | Agilent38MB | 16:71571663 | missense | C/C | 1.43E-13 | 86  | 99 | 54 | 99 | 0/0 | 0/0 | 0/0 | match | match | match |
| 108971 | TruSeqV2    | 16:75513531 | missense | C/C | 4.44E-16 | 390 | 99 | 26 | 60 | 0/0 | 0/0 | 0/0 | match | match | match |
| 115239 | TruSeqV2    | 16:75513531 | missense | C/C | 2.22E-16 | 246 | 99 | 11 | 24 | 0/0 | 0/0 | 0/0 | match | match | match |
| 132306 | Agilent38MB | 16:75513531 | missense | C/C | 2.22E-16 | 43  | 79 | 25 | 69 | 0/0 | 0/0 | 0/0 | match | match | match |



|        |             |             |          |     |          |     |    |    |    |     |     |     |       |       |       |
|--------|-------------|-------------|----------|-----|----------|-----|----|----|----|-----|-----|-----|-------|-------|-------|
| 163383 | TruSeqV2    | 16:75513531 | missense | C/C | 2.22E-16 | 287 | 99 | 29 | 75 | 0/0 | 0/0 | 0/0 | match | match | match |
| 198564 | Agilent38MB | 16:75513531 | missense | C/C | 2.22E-16 | 101 | 99 | 43 | 99 | 0/0 | 0/0 | 0/0 | match | match | match |
| 108971 | TruSeqV2    | 16:75513662 | missense | A/A | 3.93E-13 | 311 | 99 | 40 | 96 | 0/0 | 0/0 | 0/0 | match | match | match |
| 115239 | TruSeqV2    | 16:75513662 | missense | A/A | 8.88E-15 | 198 | 99 | 16 | 48 | 0/0 | 0/0 | 0/0 | match | match | match |
| 132306 | Agilent38MB | 16:75513662 | missense | A/A | 3.11E-15 | 15  | 42 | 19 | 56 | 0/0 | 0/0 | 0/0 | match | match | match |
| 163383 | TruSeqV2    | 16:75513662 | missense | A/A | 4.44E-16 | 217 | 99 | 47 | 99 | 0/0 | 0/0 | 0/0 | match | match | match |
| 198564 | Agilent38MB | 16:75513662 | missense | A/A | 6.66E-16 | 32  | 81 | 52 | 99 | 0/0 | 0/0 | 0/0 | match | match | match |
| 108971 | TruSeqV2    | 16:75513675 | stop     | G/G | 9.21E-14 | 263 | 99 | 33 | 90 | 0/0 | 0/0 | 0/0 | match | match | match |
| 115239 | TruSeqV2    | 16:75513675 | stop     | G/G | 3.33E-15 | 188 | 99 | 18 | 51 | 0/0 | 0/0 | 0/0 | match | match | match |
| 132306 | Agilent38MB | 16:75513675 | stop     | G/G | 6.66E-16 | 15  | 39 | 23 | 63 | 0/0 | 0/0 | 0/0 | match | match | match |
| 163383 | TruSeqV2    | 16:75513675 | stop     | G/G | 6.66E-16 | 201 | 99 | 42 | 99 | 0/0 | 0/0 | 0/0 | match | match | match |
| 198564 | Agilent38MB | 16:75513675 | stop     | G/G | 3.11E-15 | 25  | 42 | 50 | 99 | 0/0 | 0/0 | 0/0 | match | match | match |
| 108971 | TruSeqV2    | 16:75563266 | synon    | C/C | 1.98E-08 | 362 | 99 | 20 | 48 | 0/0 | 0/0 | 0/0 | match | match | match |
| 115239 | TruSeqV2    | 16:75563266 | synon    | C/C | 9.10E-15 | 239 | 99 | 3  | 6  | 0/0 | 0/0 | 0/0 | match | match | match |
| 132306 | Agilent38MB | 16:75563266 | synon    | C/C | 1.33E-15 | 61  | 99 | 13 | 27 | 0/0 | 0/0 | 0/0 | match | match | match |
| 163383 | TruSeqV2    | 16:75563266 | synon    | C/C | 1.55E-15 | 270 | 99 | 11 | 21 | 0/0 | 0/0 | 0/0 | match | match | match |
| 198564 | Agilent38MB | 16:75563266 | synon    | C/C | 3.33E-15 | 128 | 99 | 19 | 39 | 0/0 | 0/0 | 0/0 | match | match | match |
| 108971 | TruSeqV2    | 16:75563773 | synon    | T/T | 6.42E-07 | 301 | 99 | 7  | 18 | 0/0 | 0/0 | 0/0 | match | match | match |
| 115239 | TruSeqV2    | 16:75563773 | synon    | T/T | 1.53E-08 | 177 | 99 | 9  | 24 | 0/0 | 0/0 | 0/0 | match | match | match |
| 132306 | Agilent38MB | 16:75563773 | synon    | T/T | 7.26E-11 | 44  | 99 | 6  | 18 | 0/0 | 0/0 | 0/0 | match | match | match |
| 163383 | TruSeqV2    | 16:75563773 | synon    | T/T | 1.39E-10 | 191 | 99 | 4  | 12 | 0/0 | 0/0 | 0/0 | match | match | match |
| 198564 | Agilent38MB | 16:75563773 | synon    | T/T | 4.80E-10 | 82  | 99 | 15 | 45 | 0/0 | 0/0 | 0/0 | match | match | match |
| 108971 | TruSeqV2    | 16:75563793 | missense | T/T | 2.05E-08 | 339 | 99 | 11 | 33 | 0/0 | 0/0 | 0/0 | match | match | match |
| 115239 | TruSeqV2    | 16:75563793 | missense | T/T | 4.21E-11 | 212 | 99 | 7  | 21 | 0/0 | 0/0 | 0/0 | match | match | match |
| 132306 | Agilent38MB | 16:75563793 | missense | T/T | 4.66E-15 | 54  | 99 | 10 | 27 | 0/0 | 0/0 | 0/0 | match | match | match |
| 163383 | TruSeqV2    | 16:75563793 | missense | T/T | 3.11E-15 | 223 | 99 | 7  | 21 | 0/0 | 0/0 | 0/0 | match | match | match |
| 198564 | Agilent38MB | 16:75563793 | missense | T/T | 4.44E-15 | 88  | 99 | 16 | 45 | 0/0 | 0/0 | 0/0 | match | match | match |
| 115239 | TruSeqV2    | 16:75564287 | 5'UTR    | T/C | 4.44E-15 | 129 | 99 | 8  | 95 | 0/1 | 0/1 | 0/1 | match | match | match |
| 132306 | Agilent38MB | 16:75564287 | 5'UTR    | T/T | 4.71E-10 | 6   | 18 | 27 | 72 | 0/0 | 0/0 | 0/0 | match | match | match |
| 163383 | TruSeqV2    | 16:75564287 | 5'UTR    | T/T | 2.82E-08 | 184 | 99 | 29 | 75 | 0/0 | 0/0 | 0/0 | match | match | match |
| 108971 | TruSeqV2    | 16:75564668 | 5'UTR    | C/C | 1.87E-14 | 100 | 99 | 28 | 72 | 0/0 | 0/0 | 0/0 | match | match | match |
| 115239 | TruSeqV2    | 16:75564668 | 5'UTR    | C/C | 6.48E-14 | 80  | 99 | 25 | 66 | 0/0 | 0/0 | 0/0 | match | match | match |
| 163383 | TruSeqV2    | 16:75564668 | 5'UTR    | C/C | 6.66E-16 | 103 | 99 | 19 | 51 | 0/0 | 0/0 | 0/0 | match | match | match |
| 198564 | Agilent38MB | 16:75564668 | 5'UTR    | C/C | 3.93E-14 | 1   | 3  | 37 | 99 | 0/0 | 0/0 | 0/0 | match | match | match |
| 108971 | TruSeqV2    | 16:75565284 | 5'UTR    | G/A | 2.66E-15 | 199 | 99 | 40 | 99 | 0/1 | 0/1 | 0/1 | match | match | match |
| 115239 | TruSeqV2    | 16:75565284 | 5'UTR    | G/G | 1.43E-13 | 135 | 99 | 29 | 84 | 0/0 | 0/0 | 0/0 | match | match | match |
| 163383 | TruSeqV2    | 16:75565284 | 5'UTR    | G/G | 2.22E-15 | 171 | 99 | 40 | 99 | 0/0 | 0/0 | 0/0 | match | match | match |
| 108971 | TruSeqV2    | 16:75565420 | 5'UTR    | G/A | 1.55E-15 | 195 | 99 | 24 | 55 | 0/1 | 0/1 | 0/1 | match | match | match |

|        |             |             |          |     |          |     |    |    |    |     |     |     |       |       |       |
|--------|-------------|-------------|----------|-----|----------|-----|----|----|----|-----|-----|-----|-------|-------|-------|
| 115239 | TruSeqV2    | 16:75565420 | 5'UTR    | G/A | 3.77E-15 | 111 | 99 | 23 | 99 | 0/1 | 0/1 | 0/1 | match | match | match |
| 132306 | Agilent38MB | 16:75565420 | 5'UTR    | A/A | 1.89E-14 | 3   | 9  | 28 | 75 | 0/0 | 0/0 | 0/0 | match | match | match |
| 163383 | TruSeqV2    | 16:75565420 | 5'UTR    | A/A | 6.88E-15 | 155 | 99 | 32 | 84 | 0/0 | 0/0 | 0/0 | match | match | match |
| 108971 | TruSeqV2    | 16:87866136 | 3'UTR    | G/G | 1.11E-15 | 140 | 99 | 39 | 99 | 0/0 | 0/0 | 0/0 | match | match | match |
| 115239 | TruSeqV2    | 16:87866136 | 3'UTR    | G/G | 8.88E-16 | 105 | 99 | 17 | 42 | 0/0 | 0/0 | 0/0 | match | match | match |
| 163383 | TruSeqV2    | 16:87866136 | 3'UTR    | G/G | 8.88E-16 | 110 | 99 | 32 | 79 | 0/0 | 0/0 | 0/0 | match | match | match |
| 108971 | TruSeqV2    | 16:87866138 | 3'UTR    | G/C | 1.04E-14 | 139 | 99 | 37 | 99 | 0/1 | 0/1 | 0/1 | match | match | match |
| 115239 | TruSeqV2    | 16:87866138 | 3'UTR    | G/G | 2.00E-15 | 108 | 99 | 17 | 42 | 0/0 | 0/0 | 0/0 | match | match | match |
| 163383 | TruSeqV2    | 16:87866138 | 3'UTR    | G/C | 2.44E-15 | 109 | 99 | 31 | 99 | 0/1 | 0/1 | 0/1 | match | match | match |
| 108971 | TruSeqV2    | 16:87874736 | missense | G/G | 9.55E-14 | 276 | 99 | 54 | 99 | 0/0 | 0/0 | 0/0 | match | match | match |
| 115239 | TruSeqV2    | 16:87874736 | missense | G/G | 4.44E-16 | 185 | 99 | 33 | 90 | 0/0 | 0/0 | 0/0 | match | match | match |
| 132306 | Agilent38MB | 16:87874736 | missense | G/G | 3.33E-15 | 44  | 99 | 37 | 99 | 0/0 | 0/0 | 0/0 | match | match | match |
| 163383 | TruSeqV2    | 16:87874736 | missense | G/G | 4.44E-16 | 218 | 99 | 43 | 99 | 0/0 | 0/0 | 0/0 | match | match | match |
| 198564 | Agilent38MB | 16:87874736 | missense | G/G | 1.11E-15 | 96  | 99 | 43 | 99 | 0/0 | 0/0 | 0/0 | match | match | match |
| 108971 | TruSeqV2    | 16:89613123 | missense | A/A | 1.55E-14 | 92  | 99 | 25 | 75 | 0/0 | 0/0 | 0/0 | match | match | match |
| 115239 | TruSeqV2    | 16:89613123 | missense | A/A | 3.33E-15 | 41  | 99 | 19 | 54 | 0/0 | 0/0 | 0/0 | match | match | match |
| 132306 | Agilent38MB | 16:89613123 | missense | A/A | 1.55E-15 | 71  | 99 | 24 | 61 | 0/0 | 0/0 | 0/0 | match | match | match |
| 163383 | TruSeqV2    | 16:89613123 | missense | A/A | 7.33E-15 | 50  | 99 | 23 | 55 | 0/0 | 0/0 | 0/0 | match | match | match |
| 198564 | Agilent38MB | 16:89613123 | missense | A/A | 3.82E-14 | 120 | 99 | 28 | 67 | 0/0 | 0/0 | 0/0 | match | match | match |
| 108971 | TruSeqV2    | 16:89616967 | missense | G/G | 6.66E-16 | 128 | 99 | 27 | 72 | 0/0 | 0/0 | 0/0 | match | match | match |
| 115239 | TruSeqV2    | 16:89616967 | missense | G/G | 2.22E-16 | 107 | 99 | 11 | 27 | 0/0 | 0/0 | 0/0 | match | match | match |
| 132306 | Agilent38MB | 16:89616967 | missense | G/G | 2.22E-16 | 63  | 99 | 35 | 84 | 0/0 | 0/0 | 0/0 | match | match | match |
| 163383 | TruSeqV2    | 16:89616967 | missense | G/G | 2.22E-16 | 128 | 99 | 29 | 75 | 0/0 | 0/0 | 0/0 | match | match | match |
| 198564 | Agilent38MB | 16:89616967 | missense | G/G | 4.44E-16 | 143 | 99 | 28 | 69 | 0/0 | 0/0 | 0/0 | match | match | match |
| 108971 | TruSeqV2    | 16:89617008 | synon    | C/C | 1.33E-15 | 97  | 99 | 28 | 83 | 0/0 | 0/0 | 0/0 | match | match | match |
| 115239 | TruSeqV2    | 16:89617008 | synon    | C/C | 6.66E-16 | 83  | 99 | 8  | 21 | 0/0 | 0/0 | 0/0 | match | match | match |
| 132306 | Agilent38MB | 16:89617008 | synon    | C/C | 2.22E-16 | 41  | 99 | 24 | 63 | 0/0 | 0/0 | 0/0 | match | match | match |
| 163383 | TruSeqV2    | 16:89617008 | synon    | C/C | 4.44E-16 | 92  | 99 | 29 | 87 | 0/0 | 0/0 | 0/0 | match | match | match |
| 198564 | Agilent38MB | 16:89617008 | synon    | C/C | 2.22E-16 | 81  | 99 | 21 | 33 | 0/0 | 0/0 | 0/0 | match | match | match |
| 108971 | TruSeqV2    | 16:89619475 | missense | T/T | 4.44E-16 | 116 | 99 | 39 | 99 | 0/0 | 0/0 | 0/0 | match | match | match |
| 115239 | TruSeqV2    | 16:89619475 | missense | T/T | 6.66E-16 | 94  | 99 | 22 | 54 | 0/0 | 0/0 | 0/0 | match | match | match |
| 132306 | Agilent38MB | 16:89619475 | missense | T/T | 4.44E-16 | 43  | 93 | 32 | 87 | 0/0 | 0/0 | 0/0 | match | match | match |
| 163383 | TruSeqV2    | 16:89619475 | missense | T/T | 1.33E-15 | 106 | 99 | 29 | 75 | 0/0 | 0/0 | 0/0 | match | match | match |
| 198564 | Agilent38MB | 16:89619475 | missense | T/T | 3.55E-15 | 87  | 99 | 33 | 81 | 0/0 | 0/0 | 0/0 | match | match | match |
| 108971 | TruSeqV2    | 16:89619540 | missense | T/T | 4.44E-16 | 57  | 99 | 31 | 81 | 0/0 | 0/0 | 0/0 | match | match | match |
| 115239 | TruSeqV2    | 16:89619540 | missense | T/T | 6.66E-16 | 59  | 99 | 18 | 42 | 0/0 | 0/0 | 0/0 | match | match | match |
| 132306 | Agilent38MB | 16:89619540 | missense | T/T | 4.44E-16 | 19  | 51 | 25 | 69 | 0/0 | 0/0 | 0/0 | match | match | match |
| 163383 | TruSeqV2    | 16:89619540 | missense | T/T | 6.66E-16 | 61  | 99 | 17 | 45 | 0/0 | 0/0 | 0/0 | match | match | match |

|        |             |             |          |     |          |     |    |    |    |     |     |     |       |       |       |
|--------|-------------|-------------|----------|-----|----------|-----|----|----|----|-----|-----|-----|-------|-------|-------|
| 198564 | Agilent38MB | 16:89619540 | missense | T/T | 2.22E-15 | 26  | 63 | 27 | 69 | 0/0 | 0/0 | 0/0 | match | match | match |
| 108971 | TruSeqV2    | 16:89620328 | missense | G/G | 8.88E-16 | 109 | 99 | 22 | 51 | 0/0 | 0/0 | 0/0 | match | match | match |
| 115239 | TruSeqV2    | 16:89620328 | missense | G/G | 4.44E-16 | 70  | 99 | 15 | 39 | 0/0 | 0/0 | 0/0 | match | match | match |
| 132306 | Agilent38MB | 16:89620328 | missense | G/G | 4.44E-16 | 46  | 99 | 21 | 54 | 0/0 | 0/0 | 0/0 | match | match | match |
| 163383 | TruSeqV2    | 16:89620328 | missense | G/G | 4.44E-16 | 73  | 99 | 53 | 99 | 0/0 | 0/0 | 0/0 | match | match | match |
| 198564 | Agilent38MB | 16:89620328 | missense | G/G | 4.44E-16 | 88  | 99 | 25 | 69 | 0/0 | 0/0 | 0/0 | match | match | match |
| 108971 | TruSeqV2    | 16:89623779 | 3'UTR    | T/T | 6.66E-16 | 147 | 99 | 52 | 99 | 0/0 | 0/0 | 0/0 | match | match | match |
| 115239 | TruSeqV2    | 16:89623779 | 3'UTR    | T/T | 1.11E-15 | 109 | 99 | 18 | 54 | 0/0 | 0/0 | 0/0 | match | match | match |
| 163383 | TruSeqV2    | 16:89623779 | 3'UTR    | T/T | 8.88E-16 | 114 | 99 | 43 | 99 | 0/0 | 0/0 | 0/0 | match | match | match |
| 108971 | TruSeqV2    | 16:89624157 | 3'UTR    | G/G | 1.11E-15 | 17  | 39 | 47 | 99 | 0/0 | 0/0 | 0/0 | match | match | match |
| 115239 | TruSeqV2    | 16:89624157 | 3'UTR    | G/G | 4.44E-15 | 23  | 51 | 25 | 57 | 0/0 | 0/0 | 0/0 | match | match | match |
| 163383 | TruSeqV2    | 16:89624157 | 3'UTR    | G/G | 8.88E-16 | 17  | 39 | 42 | 99 | 0/0 | 0/0 | 0/0 | match | match | match |
| 198564 | Agilent38MB | 16:89624157 | 3'UTR    | G/G | 6.22E-15 | 4   | 6  | 46 | 99 | 0/0 | 0/0 | 0/0 | match | match | match |
| 108971 | TruSeqV2    | 16:89628073 | missense | G/G | 3.97E-05 | 200 | 99 | 26 | 72 | 0/0 | 0/0 | 0/0 | match | match | match |
| 115239 | TruSeqV2    | 16:89628073 | missense | A/G | 7.11E-15 | 136 | 99 | 23 | 99 | 0/1 | 0/1 | 0/1 | match | match | match |
| 132306 | Agilent38MB | 16:89628073 | missense | A/G | 5.57E-14 | 78  | 99 | 29 | 99 | 0/1 | 0/1 | 0/1 | match | match | match |
| 163383 | TruSeqV2    | 16:89628073 | missense | A/G | 1.60E-14 | 168 | 99 | 24 | 99 | 0/1 | 0/1 | 0/1 | match | match | match |
| 198564 | Agilent38MB | 16:89628073 | missense | A/G | 1.04E-14 | 175 | 99 | 44 | 99 | 0/1 | 0/1 | 0/1 | match | match | match |
| 108971 | TruSeqV2    | 16:89629322 | missense | A/A | 6.35E-14 | 85  | 99 | 43 | 99 | 0/0 | 0/0 | 0/0 | match | match | match |
| 115239 | TruSeqV2    | 16:89629322 | missense | A/A | 1.11E-15 | 64  | 99 | 35 | 93 | 0/0 | 0/0 | 0/0 | match | match | match |
| 132306 | Agilent38MB | 16:89629322 | missense | A/A | 2.00E-15 | 131 | 99 | 40 | 99 | 0/0 | 0/0 | 0/0 | match | match | match |
| 163383 | TruSeqV2    | 16:89629322 | missense | A/A | 1.93E-14 | 77  | 99 | 34 | 90 | 0/0 | 0/0 | 0/0 | match | match | match |
| 198564 | Agilent38MB | 16:89629322 | missense | A/A | 1.11E-15 | 234 | 99 | 51 | 99 | 0/0 | 0/0 | 0/0 | match | match | match |
| 108971 | TruSeqV2    | 17:19552312 | stop     | C/C | 2.24E-14 | 39  | 99 | 36 | 93 | 0/0 | 0/0 | 0/0 | match | match | match |
| 115239 | TruSeqV2    | 17:19552312 | stop     | C/C | 1.11E-15 | 29  | 75 | 1  | 3  | 0/0 | 0/0 | 0/0 | match | match | match |
| 132306 | Agilent38MB | 17:19552312 | stop     | C/C | 6.66E-16 | 14  | 36 | 21 | 60 | 0/0 | 0/0 | 0/0 | match | match | match |
| 163383 | TruSeqV2    | 17:19552312 | stop     | C/C | 1.55E-15 | 25  | 69 | 30 | 81 | 0/0 | 0/0 | 0/0 | match | match | match |
| 198564 | Agilent38MB | 17:19552312 | stop     | C/C | 8.88E-16 | 25  | 63 | 47 | 99 | 0/0 | 0/0 | 0/0 | match | match | match |
| 108971 | TruSeqV2    | 17:19554939 | stop     | G/G | 2.89E-15 | 209 | 99 | 49 | 99 | 0/0 | 0/0 | 0/0 | match | match | match |
| 115239 | TruSeqV2    | 17:19554939 | stop     | G/G | 4.44E-16 | 162 | 99 | 43 | 99 | 0/0 | 0/0 | 0/0 | match | match | match |
| 132306 | Agilent38MB | 17:19554939 | stop     | G/G | 4.44E-16 | 250 | 99 | 43 | 99 | 0/0 | 0/0 | 0/0 | match | match | match |
| 163383 | TruSeqV2    | 17:19554939 | stop     | G/G | 6.66E-16 | 200 | 99 | 25 | 69 | 0/0 | 0/0 | 0/0 | match | match | match |
| 198564 | Agilent38MB | 17:19554939 | stop     | G/G | 1.11E-15 | 465 | 99 | 41 | 99 | 0/0 | 0/0 | 0/0 | match | match | match |
| 108971 | TruSeqV2    | 17:19559736 | stop     | C/C | 1.35E-14 | 114 | 99 | 49 | 99 | 0/0 | 0/0 | 0/0 | match | match | match |
| 115239 | TruSeqV2    | 17:19559736 | stop     | C/C | 4.44E-16 | 89  | 99 | 46 | 99 | 0/0 | 0/0 | 0/0 | match | match | match |
| 132306 | Agilent38MB | 17:19559736 | stop     | C/C | 2.22E-16 | 113 | 99 | 41 | 99 | 0/0 | 0/0 | 0/0 | match | match | match |
| 163383 | TruSeqV2    | 17:19559736 | stop     | C/C | 2.22E-16 | 111 | 99 | 39 | 99 | 0/0 | 0/0 | 0/0 | match | match | match |
| 198564 | Agilent38MB | 17:19559736 | stop     | C/C | 4.44E-16 | 190 | 99 | 56 | 99 | 0/0 | 0/0 | 0/0 | match | match | match |

|        |             |             |          |     |          |     |    |    |    |     |     |     |       |       |       |
|--------|-------------|-------------|----------|-----|----------|-----|----|----|----|-----|-----|-----|-------|-------|-------|
| 108971 | TruSeqV2    | 17:19559758 | missense | C/C | 8.44E-15 | 157 | 99 | 48 | 99 | 0/0 | 0/0 | 0/0 | match | match | match |
| 115239 | TruSeqV2    | 17:19559758 | missense | C/C | 4.44E-16 | 120 | 99 | 55 | 99 | 0/0 | 0/0 | 0/0 | match | match | match |
| 132306 | Agilent38MB | 17:19559758 | missense | C/C | 4.44E-16 | 98  | 99 | 46 | 99 | 0/0 | 0/0 | 0/0 | match | match | match |
| 163383 | TruSeqV2    | 17:19559758 | missense | C/C | 4.44E-16 | 136 | 99 | 42 | 99 | 0/0 | 0/0 | 0/0 | match | match | match |
| 198564 | Agilent38MB | 17:19559758 | missense | C/C | 8.88E-16 | 156 | 99 | 58 | 99 | 0/0 | 0/0 | 0/0 | match | match | match |
| 108971 | TruSeqV2    | 17:19561059 | missense | C/C | 2.22E-16 | 33  | 93 | 56 | 99 | 0/0 | 0/0 | 0/0 | match | match | match |
| 115239 | TruSeqV2    | 17:19561059 | missense | C/C | 1.78E-15 | 24  | 63 | 38 | 96 | 0/0 | 0/0 | 0/0 | match | match | match |
| 132306 | Agilent38MB | 17:19561059 | missense | C/C | 6.66E-16 | 103 | 99 | 33 | 87 | 0/0 | 0/0 | 0/0 | match | match | match |
| 163383 | TruSeqV2    | 17:19561059 | missense | C/C | 3.77E-15 | 29  | 75 | 35 | 99 | 0/0 | 0/0 | 0/0 | match | match | match |
| 198564 | Agilent38MB | 17:19561059 | missense | C/C | 1.03E-13 | 207 | 99 | 38 | 99 | 0/0 | 0/0 | 0/0 | match | match | match |
| 108971 | TruSeqV2    | 17:19561110 | missense | G/G | 6.66E-16 | 46  | 99 | 41 | 99 | 0/0 | 0/0 | 0/0 | match | match | match |
| 115239 | TruSeqV2    | 17:19561110 | missense | G/G | 6.66E-16 | 32  | 78 | 33 | 87 | 0/0 | 0/0 | 0/0 | match | match | match |
| 132306 | Agilent38MB | 17:19561110 | missense | G/G | 2.22E-16 | 107 | 99 | 37 | 99 | 0/0 | 0/0 | 0/0 | match | match | match |
| 163383 | TruSeqV2    | 17:19561110 | missense | G/G | 2.22E-16 | 32  | 84 | 35 | 93 | 0/0 | 0/0 | 0/0 | match | match | match |
| 198564 | Agilent38MB | 17:19561110 | missense | G/G | 6.66E-16 | 208 | 99 | 30 | 78 | 0/0 | 0/0 | 0/0 | match | match | match |
| 108971 | TruSeqV2    | 17:19575103 | stop     | T/T | 2.22E-16 | 59  | 99 | 35 | 96 | 0/0 | 0/0 | 0/0 | match | match | match |
| 115239 | TruSeqV2    | 17:19575103 | stop     | T/T | 6.66E-16 | 26  | 75 | 34 | 87 | 0/0 | 0/0 | 0/0 | match | match | match |
| 132306 | Agilent38MB | 17:19575103 | stop     | T/T | 4.44E-16 | 58  | 99 | 38 | 99 | 0/0 | 0/0 | 0/0 | match | match | match |
| 163383 | TruSeqV2    | 17:19575103 | stop     | T/T | 6.66E-16 | 45  | 99 | 42 | 99 | 0/0 | 0/0 | 0/0 | match | match | match |
| 198564 | Agilent38MB | 17:19575103 | stop     | T/T | 4.66E-15 | 69  | 99 | 55 | 99 | 0/0 | 0/0 | 0/0 | match | match | match |
| 108971 | TruSeqV2    | 17:19642891 | fs       | G/G | 4.44E-16 | 143 | 99 | 46 | 99 | 0/0 | 0/0 | 0/0 | match | match | match |
| 115239 | TruSeqV2    | 17:19642891 | fs       | G/G | 4.44E-16 | 143 | 99 | 46 | 99 | 0/0 | 0/0 | 0/0 | match | match | match |
| 132306 | Agilent38MB | 17:19642891 | fs       | G/G | 3.33E-15 | 143 | 99 | 46 | 99 | 0/0 | 0/0 | 0/0 | match | match | match |
| 163383 | TruSeqV2    | 17:19642891 | fs       | G/G | 1.11E-15 | 143 | 99 | 46 | 99 | 0/0 | 0/0 | 0/0 | match | match | match |
| 198564 | Agilent38MB | 17:19642891 | fs       | G/G | 1.78E-15 | 143 | 99 | 46 | 99 | 0/0 | 0/0 | 0/0 | match | match | match |
| 108971 | TruSeqV2    | 17:19643684 | missense | T/T | 6.66E-16 | 101 | 99 | 26 | 57 | 0/0 | 0/0 | 0/0 | match | match | match |
| 115239 | TruSeqV2    | 17:19643684 | missense | T/T | 2.66E-15 | 70  | 99 | 13 | 39 | 0/0 | 0/0 | 0/0 | match | match | match |
| 132306 | Agilent38MB | 17:19643684 | missense | T/T | 4.66E-15 | 16  | 42 | 24 | 63 | 0/0 | 0/0 | 0/0 | match | match | match |
| 163383 | TruSeqV2    | 17:19643684 | missense | T/T | 4.44E-16 | 84  | 99 | 21 | 60 | 0/0 | 0/0 | 0/0 | match | match | match |
| 198564 | Agilent38MB | 17:19643684 | missense | T/T | 4.44E-16 | 19  | 54 | 36 | 94 | 0/0 | 0/0 | 0/0 | match | match | match |
| 108971 | TruSeqV2    | 17:19644472 | synon    | T/A | 1.00E-13 | 158 | 99 | 37 | 99 | 0/1 | 0/1 | 0/1 | match | match | match |
| 115239 | TruSeqV2    | 17:19644472 | synon    | A/A | 7.71E-06 | 114 | 99 | 34 | 90 | 0/0 | 0/0 | 0/0 | match | match | match |
| 132306 | Agilent38MB | 17:19644472 | synon    | T/A | 7.55E-15 | 97  | 99 | 29 | 99 | 0/1 | 0/1 | 0/1 | match | match | match |
| 163383 | TruSeqV2    | 17:19644472 | synon    | T/A | 2.16E-10 | 138 | 99 | 28 | 99 | 0/1 | 0/1 | 0/1 | match | match | match |
| 198564 | Agilent38MB | 17:19644472 | synon    | T/A | 2.26E-07 | 129 | 99 | 41 | 99 | 0/1 | 0/1 | 0/1 | match | match | match |
| 108971 | TruSeqV2    | 17:19645412 | synon    | C/C | 1.35E-13 | 119 | 99 | 33 | 93 | 0/0 | 0/0 | 0/0 | match | match | match |
| 115239 | TruSeqV2    | 17:19645412 | synon    | C/C | 3.65E-08 | 97  | 99 | 19 | 51 | 0/0 | 0/0 | 0/0 | match | match | match |
| 132306 | Agilent38MB | 17:19645412 | synon    | C/C | 4.00E-15 | 99  | 99 | 37 | 90 | 0/0 | 0/0 | 0/0 | match | match | match |

|        |             |             |          |     |          |     |    |    |    |     |     |     |       |       |       |
|--------|-------------|-------------|----------|-----|----------|-----|----|----|----|-----|-----|-----|-------|-------|-------|
| 163383 | TruSeqV2    | 17:19645412 | synon    | C/C | 6.40E-10 | 86  | 99 | 30 | 87 | 0/0 | 0/0 | 0/0 | match | match | match |
| 108971 | TruSeqV2    | 17:19645938 | missense | C/A | 1.31E-14 | 165 | 99 | 25 | 99 | 0/1 | 0/1 | 0/1 | match | match | match |
| 115239 | TruSeqV2    | 17:19645938 | missense | C/C | 2.89E-15 | 120 | 99 | 14 | 42 | 1/1 | 1/1 | 1/1 | match | match | match |
| 132306 | Agilent38MB | 17:19645938 | missense | C/A | 4.22E-15 | 38  | 99 | 35 | 99 | 0/1 | 0/1 | 0/1 | match | match | match |
| 163383 | TruSeqV2    | 17:19645938 | missense | C/A | 5.55E-15 | 129 | 99 | 35 | 99 | 0/1 | 0/1 | 0/1 | match | match | match |
| 198564 | Agilent38MB | 17:19645938 | missense | C/A | 5.11E-15 | 75  | 99 | 40 | 99 | 0/1 | 0/1 | 0/1 | match | match | match |
| 198564 | Agilent38MB | 17:37824754 | missense | A/A | 3.45E-09 | 6   | 17 | 9  | 27 | 0/0 | 0/0 | 0/0 | match | match | match |
| 108971 | TruSeqV2    | 17:37826355 | missense | A/A | 3.33E-15 | 162 | 99 | 33 | 90 | 0/0 | 0/0 | 0/0 | match | match | match |
| 115239 | TruSeqV2    | 17:37826355 | missense | A/A | 6.49E-13 | 106 | 99 | 8  | 21 | 0/0 | 0/0 | 0/0 | match | match | match |
| 132306 | Agilent38MB | 17:37826355 | missense | A/A | 5.80E-14 | 44  | 99 | 29 | 84 | 0/0 | 0/0 | 0/0 | match | match | match |
| 163383 | TruSeqV2    | 17:37826355 | missense | A/A | 2.89E-14 | 115 | 99 | 27 | 69 | 0/0 | 0/0 | 0/0 | match | match | match |
| 198564 | Agilent38MB | 17:37826355 | missense | A/A | 6.66E-16 | 106 | 99 | 32 | 78 | 0/0 | 0/0 | 0/0 | match | match | match |
| 108971 | TruSeqV2    | 17:37826619 | missense | T/T | 1.03E-11 | 170 | 99 | 31 | 66 | 0/0 | 0/0 | 0/0 | match | match | match |
| 115239 | TruSeqV2    | 17:37826619 | missense | T/T | 1.83E-09 | 99  | 99 | 7  | 18 | 0/0 | 0/0 | 0/0 | match | match | match |
| 132306 | Agilent38MB | 17:37826619 | missense | T/T | 1.45E-13 | 29  | 42 | 33 | 93 | 0/0 | 0/0 | 0/0 | match | match | match |
| 163383 | TruSeqV2    | 17:37826619 | missense | T/T | 3.14E-11 | 130 | 99 | 37 | 99 | 0/0 | 0/0 | 0/0 | match | match | match |
| 198564 | Agilent38MB | 17:37826619 | missense | T/T | 9.70E-09 | 48  | 99 | 47 | 99 | 0/0 | 0/0 | 0/0 | match | match | match |
| 108971 | TruSeqV2    | 17:37828496 | 3'UTR    | T/C | 4.64E-14 | 271 | 99 | 43 | 99 | 0/1 | 0/1 | 0/1 | match | match | match |
| 115239 | TruSeqV2    | 17:37828496 | 3'UTR    | C/C | 2.22E-15 | 199 | 99 | 17 | 51 | 1/1 | 1/1 | 1/1 | match | match | match |
| 163383 | TruSeqV2    | 17:37828496 | 3'UTR    | C/C | 4.44E-15 | 250 | 99 | 23 | 69 | 1/1 | 1/1 | 1/1 | match | match | match |
| 108971 | TruSeqV2    | 17:48745066 | missense | C/C | 4.44E-16 | 153 | 99 | 26 | 72 | 0/0 | 0/0 | 0/0 | match | match | match |
| 115239 | TruSeqV2    | 17:48745066 | missense | C/C | 4.44E-16 | 112 | 99 | 16 | 39 | 0/0 | 0/0 | 0/0 | match | match | match |
| 132306 | Agilent38MB | 17:48745066 | missense | C/C | 4.44E-16 | 104 | 99 | 29 | 81 | 0/0 | 0/0 | 0/0 | match | match | match |
| 163383 | TruSeqV2    | 17:48745066 | missense | C/C | 4.44E-16 | 110 | 99 | 29 | 81 | 0/0 | 0/0 | 0/0 | match | match | match |
| 198564 | Agilent38MB | 17:48745066 | missense | C/C | 4.44E-16 | 130 | 99 | 32 | 66 | 0/0 | 0/0 | 0/0 | match | match | match |
| 108971 | TruSeqV2    | 17:48753423 | synon    | C/C | 4.44E-16 | 197 | 99 | 44 | 99 | 0/0 | 0/0 | 0/0 | match | match | match |
| 115239 | TruSeqV2    | 17:48753423 | synon    | C/C | 6.66E-16 | 118 | 99 | 25 | 66 | 0/0 | 0/0 | 0/0 | match | match | match |
| 132306 | Agilent38MB | 17:48753423 | synon    | C/C | 6.66E-16 | 90  | 99 | 43 | 99 | 0/0 | 0/0 | 0/0 | match | match | match |
| 163383 | TruSeqV2    | 17:48753423 | synon    | C/C | 6.66E-16 | 169 | 99 | 39 | 98 | 0/0 | 0/0 | 0/0 | match | match | match |
| 198564 | Agilent38MB | 17:48753423 | synon    | C/C | 6.66E-16 | 148 | 99 | 58 | 99 | 0/0 | 0/0 | 0/0 | match | match | match |
| 108971 | TruSeqV2    | 17:48761053 | missense | G/G | 4.44E-16 | 130 | 99 | 46 | 99 | 0/0 | 0/0 | 0/0 | match | match | match |
| 115239 | TruSeqV2    | 17:48761053 | missense | A/G | 8.88E-15 | 82  | 99 | 21 | 99 | 0/1 | 0/1 | 0/1 | match | match | match |
| 132306 | Agilent38MB | 17:48761053 | missense | G/G | 6.66E-16 | 97  | 99 | 47 | 99 | 0/0 | 0/0 | 0/0 | match | match | match |
| 163383 | TruSeqV2    | 17:48761053 | missense | G/G | 2.22E-16 | 96  | 99 | 35 | 81 | 0/0 | 0/0 | 0/0 | match | match | match |
| 198564 | Agilent38MB | 17:48761053 | missense | G/G | 6.66E-16 | 147 | 99 | 49 | 99 | 0/0 | 0/0 | 0/0 | match | match | match |
| 108971 | TruSeqV2    | 17:48761105 | synon    | C/C | 2.44E-15 | 118 | 99 | 36 | 99 | 0/0 | 0/0 | 0/0 | match | match | match |
| 115239 | TruSeqV2    | 17:48761105 | synon    | C/T | 5.33E-15 | 70  | 99 | 19 | 99 | 0/1 | 0/1 | 0/1 | match | match | match |
| 132306 | Agilent38MB | 17:48761105 | synon    | C/C | 2.66E-15 | 144 | 99 | 45 | 99 | 0/0 | 0/0 | 0/0 | match | match | match |

|        |             |             |          |     |          |     |    |    |    |     |     |     |       |       |       |
|--------|-------------|-------------|----------|-----|----------|-----|----|----|----|-----|-----|-----|-------|-------|-------|
| 163383 | TruSeqV2    | 17:48761105 | synon    | C/T | 5.33E-15 | 98  | 99 | 40 | 99 | 0/1 | 0/1 | 0/1 | match | match | match |
| 198564 | Agilent38MB | 17:48761105 | synon    | C/C | 6.22E-15 | 261 | 99 | 51 | 99 | 0/0 | 0/0 | 0/0 | match | match | match |
| 108971 | TruSeqV2    | 17:48761439 | missense | C/C | 6.66E-16 | 165 | 99 | 44 | 99 | 0/0 | 0/0 | 0/0 | match | match | match |
| 115239 | TruSeqV2    | 17:48761439 | missense | C/C | 9.99E-15 | 108 | 99 | 21 | 60 | 0/0 | 0/0 | 0/0 | match | match | match |
| 132306 | Agilent38MB | 17:48761439 | missense | C/C | 4.44E-16 | 42  | 99 | 42 | 99 | 0/0 | 0/0 | 0/0 | match | match | match |
| 163383 | TruSeqV2    | 17:48761439 | missense | C/C | 6.66E-16 | 120 | 99 | 48 | 99 | 0/0 | 0/0 | 0/0 | match | match | match |
| 198564 | Agilent38MB | 17:48761439 | missense | C/C | 1.33E-15 | 118 | 99 | 60 | 99 | 0/0 | 0/0 | 0/0 | match | match | match |
| 108971 | TruSeqV2    | 17:48768486 | synon    | A/A | 8.88E-16 | 151 | 99 | 45 | 99 | 0/0 | 0/0 | 0/0 | match | match | match |
| 115239 | TruSeqV2    | 17:48768486 | synon    | A/G | 4.44E-15 | 84  | 99 | 29 | 99 | 0/1 | 0/1 | 0/1 | match | match | match |
| 132306 | Agilent38MB | 17:48768486 | synon    | A/A | 8.88E-16 | 143 | 99 | 33 | 90 | 0/0 | 0/0 | 0/0 | match | match | match |
| 163383 | TruSeqV2    | 17:48768486 | synon    | A/G | 2.66E-15 | 105 | 99 | 41 | 99 | 0/1 | 0/1 | 0/1 | match | match | match |
| 198564 | Agilent38MB | 17:48768486 | synon    | A/A | 4.44E-16 | 250 | 99 | 39 | 99 | 0/0 | 0/0 | 0/0 | match | match | match |
| 108971 | TruSeqV2    | 18:24496917 | missense | T/T | 4.44E-16 | 125 | 99 | 40 | 99 | 0/0 | 0/0 | 0/0 | match | match | match |
| 115239 | TruSeqV2    | 18:24496917 | missense | T/T | 8.88E-16 | 72  | 99 | 53 | 99 | 0/0 | 0/0 | 0/0 | match | match | match |
| 132306 | Agilent38MB | 18:24496917 | missense | T/T | 4.44E-16 | 104 | 99 | 48 | 99 | 0/0 | 0/0 | 0/0 | match | match | match |
| 163383 | TruSeqV2    | 18:24496917 | missense | T/T | 8.88E-16 | 106 | 99 | 43 | 99 | 0/0 | 0/0 | 0/0 | match | match | match |
| 198564 | Agilent38MB | 18:24496917 | missense | T/T | 2.22E-12 | 186 | 99 | 40 | 99 | 0/0 | 0/0 | 0/0 | match | match | match |
| 108971 | TruSeqV2    | 18:24497190 | missense | C/C | 2.22E-16 | 54  | 99 | 38 | 99 | 0/0 | 0/0 | 0/0 | match | match | match |
| 115239 | TruSeqV2    | 18:24497190 | missense | C/C | 4.44E-16 | 52  | 99 | 44 | 99 | 0/0 | 0/0 | 0/0 | match | match | match |
| 132306 | Agilent38MB | 18:24497190 | missense | C/C | 2.22E-16 | 551 | 99 | 36 | 96 | 0/0 | 0/0 | 0/0 | match | match | match |
| 163383 | TruSeqV2    | 18:24497190 | missense | C/C | 2.22E-16 | 49  | 99 | 46 | 99 | 0/0 | 0/0 | 0/0 | match | match | match |
| 198564 | Agilent38MB | 18:24497190 | missense | C/C | 9.48E-13 | 974 | 99 | 53 | 99 | 0/0 | 0/0 | 0/0 | match | match | match |
| 108971 | TruSeqV2    | 18:24497224 | missense | T/T | 6.66E-16 | 41  | 93 | 35 | 96 | 0/0 | 0/0 | 0/0 | match | match | match |
| 115239 | TruSeqV2    | 18:24497224 | missense | T/T | 4.44E-16 | 46  | 99 | 50 | 99 | 0/0 | 0/0 | 0/0 | match | match | match |
| 132306 | Agilent38MB | 18:24497224 | missense | T/T | 1.11E-15 | 488 | 99 | 33 | 87 | 0/0 | 0/0 | 0/0 | match | match | match |
| 163383 | TruSeqV2    | 18:24497224 | missense | T/T | 4.44E-16 | 42  | 99 | 43 | 99 | 0/0 | 0/0 | 0/0 | match | match | match |
| 198564 | Agilent38MB | 18:24497224 | missense | T/T | 6.22E-15 | 828 | 99 | 46 | 99 | 0/0 | 0/0 | 0/0 | match | match | match |
| 108971 | TruSeqV2    | 18:24628442 | missense | T/T | 4.44E-16 | 76  | 99 | 38 | 99 | 0/0 | 0/0 | 0/0 | match | match | match |
| 115239 | TruSeqV2    | 18:24628442 | missense | T/T | 4.44E-16 | 54  | 99 | 44 | 99 | 0/0 | 0/0 | 0/0 | match | match | match |
| 132306 | Agilent38MB | 18:24628442 | missense | T/T | 4.44E-16 | 80  | 99 | 39 | 99 | 0/0 | 0/0 | 0/0 | match | match | match |
| 163383 | TruSeqV2    | 18:24628442 | missense | T/T | 4.22E-15 | 76  | 99 | 37 | 99 | 0/0 | 0/0 | 0/0 | match | match | match |
| 198564 | Agilent38MB | 18:24628442 | missense | T/T | 2.35E-13 | 172 | 99 | 54 | 99 | 0/0 | 0/0 | 0/0 | match | match | match |
| 108971 | TruSeqV2    | 18:24722839 | 5'UTR    | G/G | 2.42E-14 | 26  | 72 | 57 | 99 | 0/0 | 0/0 | 0/0 | match | match | match |
| 115239 | TruSeqV2    | 18:24722839 | 5'UTR    | G/G | 5.37E-14 | 17  | 33 | 51 | 99 | 0/0 | 0/0 | 0/0 | match | match | match |
| 132306 | Agilent38MB | 18:24722839 | 5'UTR    | G/G | 1.93E-11 | 47  | 99 | 38 | 99 | 0/0 | 0/0 | 0/0 | match | match | match |
| 163383 | TruSeqV2    | 18:24722839 | 5'UTR    | G/G | 2.62E-11 | 28  | 35 | 56 | 99 | 0/0 | 0/0 | 0/0 | match | match | match |
| 198564 | Agilent38MB | 18:24722839 | 5'UTR    | G/G | 7.12E-11 | 78  | 99 | 62 | 99 | 0/0 | 0/0 | 0/0 | match | match | match |
| 108971 | TruSeqV2    | 18:662164   | missense | G/G | 1.01E-13 | 113 | 99 | 44 | 96 | 0/0 | 0/0 | 0/0 | match | match | match |

|        |             |            |          |     |          |     |    |    |    |     |     |     |       |       |       |
|--------|-------------|------------|----------|-----|----------|-----|----|----|----|-----|-----|-----|-------|-------|-------|
| 115239 | TruSeqV2    | 18:662164  | missense | G/G | 4.03E-11 | 106 | 99 | 41 | 99 | 0/0 | 0/0 | 0/0 | match | match | match |
| 132306 | Agilent38MB | 18:662164  | missense | G/G | 4.44E-16 | 45  | 99 | 36 | 99 | 0/0 | 0/0 | 0/0 | match | match | match |
| 163383 | TruSeqV2    | 18:662164  | missense | G/G | 1.95E-14 | 97  | 99 | 37 | 99 | 0/0 | 0/0 | 0/0 | match | match | match |
| 198564 | Agilent38MB | 18:662164  | missense | G/G | 1.40E-13 | 82  | 99 | 48 | 99 | 0/0 | 0/0 | 0/0 | match | match | match |
| 108971 | TruSeqV2    | 18:662215  | missense | T/T | 6.66E-16 | 164 | 99 | 42 | 99 | 0/0 | 0/0 | 0/0 | match | match | match |
| 115239 | TruSeqV2    | 18:662215  | missense | T/T | 2.22E-15 | 144 | 99 | 27 | 72 | 0/0 | 0/0 | 0/0 | match | match | match |
| 132306 | Agilent38MB | 18:662215  | missense | T/T | 4.44E-16 | 33  | 72 | 25 | 66 | 0/0 | 0/0 | 0/0 | match | match | match |
| 163383 | TruSeqV2    | 18:662215  | missense | T/T | 4.44E-16 | 125 | 99 | 32 | 90 | 0/0 | 0/0 | 0/0 | match | match | match |
| 198564 | Agilent38MB | 18:662215  | missense | T/T | 2.93E-14 | 74  | 99 | 52 | 99 | 0/0 | 0/0 | 0/0 | match | match | match |
| 108971 | TruSeqV2    | 18:662247  | synon    | A/A | 1.11E-15 | 158 | 99 | 33 | 87 | 0/0 | 0/0 | 0/0 | match | match | match |
| 115239 | TruSeqV2    | 18:662247  | synon    | A/A | 1.11E-15 | 122 | 99 | 28 | 72 | 0/0 | 0/0 | 0/0 | match | match | match |
| 132306 | Agilent38MB | 18:662247  | synon    | A/A | 3.77E-15 | 32  | 87 | 30 | 75 | 0/0 | 0/0 | 0/0 | match | match | match |
| 163383 | TruSeqV2    | 18:662247  | synon    | A/A | 1.82E-14 | 136 | 99 | 33 | 84 | 0/0 | 0/0 | 0/0 | match | match | match |
| 198564 | Agilent38MB | 18:662247  | synon    | A/A | 2.00E-15 | 67  | 99 | 48 | 99 | 0/0 | 0/0 | 0/0 | match | match | match |
| 108971 | TruSeqV2    | 18:669087  | missense | G/G | 8.88E-16 | 186 | 99 | 23 | 60 | 0/0 | 0/0 | 0/0 | match | match | match |
| 115239 | TruSeqV2    | 18:669087  | missense | G/G | 1.11E-15 | 139 | 99 | 38 | 96 | 0/0 | 0/0 | 0/0 | match | match | match |
| 132306 | Agilent38MB | 18:669087  | missense | G/G | 6.66E-16 | 110 | 99 | 36 | 99 | 0/0 | 0/0 | 0/0 | match | match | match |
| 163383 | TruSeqV2    | 18:669087  | missense | G/G | 4.44E-16 | 188 | 99 | 37 | 93 | 0/0 | 0/0 | 0/0 | match | match | match |
| 198564 | Agilent38MB | 18:669087  | missense | G/G | 2.22E-16 | 251 | 99 | 35 | 96 | 0/0 | 0/0 | 0/0 | match | match | match |
| 108971 | TruSeqV2    | 18:669117  | missense | C/C | 4.44E-16 | 218 | 99 | 27 | 72 | 0/0 | 0/0 | 0/0 | match | match | match |
| 115239 | TruSeqV2    | 18:669117  | missense | C/C | 1.11E-15 | 143 | 99 | 28 | 63 | 0/0 | 0/0 | 0/0 | match | match | match |
| 132306 | Agilent38MB | 18:669117  | missense | C/C | 4.44E-16 | 132 | 99 | 38 | 84 | 0/0 | 0/0 | 0/0 | match | match | match |
| 163383 | TruSeqV2    | 18:669117  | missense | C/C | 4.44E-16 | 211 | 99 | 28 | 66 | 0/0 | 0/0 | 0/0 | match | match | match |
| 198564 | Agilent38MB | 18:669117  | missense | C/C | 1.33E-15 | 327 | 99 | 32 | 78 | 0/0 | 0/0 | 0/0 | match | match | match |
| 108971 | TruSeqV2    | 18:9517043 | missense | A/A | 3.33E-15 | 44  | 99 | 47 | 99 | 0/0 | 0/0 | 0/0 | match | match | match |
| 115239 | TruSeqV2    | 18:9517043 | missense | A/A | 6.66E-16 | 38  | 99 | 28 | 72 | 0/0 | 0/0 | 0/0 | match | match | match |
| 132306 | Agilent38MB | 18:9517043 | missense | A/A | 2.66E-15 | 3   | 9  | 44 | 99 | 0/0 | 0/0 | 0/0 | match | match | match |
| 163383 | TruSeqV2    | 18:9517043 | missense | A/A | 6.66E-16 | 52  | 99 | 61 | 99 | 0/0 | 0/0 | 0/0 | match | match | match |
| 108971 | TruSeqV2    | 18:9517221 | missense | G/G | 7.28E-14 | 157 | 99 | 31 | 75 | 0/0 | 0/0 | 0/0 | match | match | match |
| 115239 | TruSeqV2    | 18:9517221 | missense | G/G | 2.44E-15 | 133 | 99 | 27 | 75 | 0/0 | 0/0 | 0/0 | match | match | match |
| 132306 | Agilent38MB | 18:9517221 | missense | G/G | 1.02E-14 | 71  | 99 | 32 | 81 | 0/0 | 0/0 | 0/0 | match | match | match |
| 163383 | TruSeqV2    | 18:9517221 | missense | G/G | 1.58E-14 | 143 | 99 | 39 | 93 | 0/0 | 0/0 | 0/0 | match | match | match |
| 198564 | Agilent38MB | 18:9517221 | missense | G/G | 2.35E-14 | 143 | 99 | 44 | 99 | 0/0 | 0/0 | 0/0 | match | match | match |
| 108971 | TruSeqV2    | 18:9535817 | missense | C/C | 4.44E-16 | 72  | 99 | 47 | 99 | 0/0 | 0/0 | 0/0 | match | match | match |
| 115239 | TruSeqV2    | 18:9535817 | missense | C/C | 2.00E-15 | 36  | 72 | 18 | 54 | 0/0 | 0/0 | 0/0 | match | match | match |
| 132306 | Agilent38MB | 18:9535817 | missense | C/C | 8.88E-16 | 11  | 30 | 25 | 74 | 0/0 | 0/0 | 0/0 | match | match | match |
| 163383 | TruSeqV2    | 18:9535817 | missense | C/C | 2.22E-16 | 38  | 90 | 28 | 78 | 0/0 | 0/0 | 0/0 | match | match | match |
| 198564 | Agilent38MB | 18:9535817 | missense | C/C | 4.44E-16 | 20  | 51 | 38 | 99 | 0/0 | 0/0 | 0/0 | match | match | match |

|        |             |             |          |     |          |     |    |    |    |     |     |     |       |       |       |
|--------|-------------|-------------|----------|-----|----------|-----|----|----|----|-----|-----|-----|-------|-------|-------|
| 108971 | TruSeqV2    | 18:9536249  | 3'UTR    | C/T | 2.66E-15 | 173 | 99 | 39 | 99 | 0/1 | 0/1 | 0/1 | match | match | match |
| 163383 | TruSeqV2    | 18:9536249  | 3'UTR    | T/T | 2.38E-14 | 149 | 99 | 33 | 98 | 1/1 | 1/1 | 1/1 | match | match | match |
| 108971 | TruSeqV2    | 18:9536691  | 3'UTR    | G/G | 8.88E-16 | 115 | 99 | 40 | 96 | 0/0 | 0/0 | 0/0 | match | match | match |
| 115239 | TruSeqV2    | 18:9536691  | 3'UTR    | G/G | 2.00E-15 | 101 | 99 | 23 | 69 | 0/0 | 0/0 | 0/0 | match | match | match |
| 132306 | Agilent38MB | 18:9536691  | 3'UTR    | G/G | 1.13E-14 | 1   | 3  | 33 | 90 | 0/0 | 0/0 | 0/0 | match | match | match |
| 163383 | TruSeqV2    | 18:9536691  | 3'UTR    | A/G | 8.84E-14 | 96  | 99 | 33 | 99 | 0/1 | 0/1 | 0/1 | match | match | match |
| 108971 | TruSeqV2    | 18:9537835  | 3'UTR    | G/G | 2.22E-15 | 93  | 99 | 35 | 84 | 0/0 | 0/0 | 0/0 | match | match | match |
| 115239 | TruSeqV2    | 18:9537835  | 3'UTR    | G/G | 4.44E-16 | 51  | 99 | 17 | 48 | 0/0 | 0/0 | 0/0 | match | match | match |
| 163383 | TruSeqV2    | 18:9537835  | 3'UTR    | G/G | 8.88E-16 | 64  | 99 | 37 | 90 | 0/0 | 0/0 | 0/0 | match | match | match |
| 198564 | Agilent38MB | 18:9537835  | 3'UTR    | G/G | 9.81E-14 | 3   | 9  | 33 | 81 | 0/0 | 0/0 | 0/0 | match | match | match |
| 108971 | TruSeqV2    | 19:15726147 | intronic | G/G | 4.44E-16 | 66  | 99 | 31 | 93 | 1/1 | 1/1 | 1/1 | match | match | match |
| 115239 | TruSeqV2    | 19:15726147 | intronic | G/G | 4.44E-16 | 53  | 99 | 21 | 63 | 1/1 | 1/1 | 1/1 | match | match | match |
| 163383 | TruSeqV2    | 19:15726147 | intronic | G/G | 4.44E-16 | 47  | 99 | 28 | 84 | 1/1 | 1/1 | 1/1 | match | match | match |
| 108971 | TruSeqV2    | 19:15726487 | synon    | T/T | 2.18E-14 | 124 | 99 | 24 | 72 | 1/1 | 1/1 | 1/1 | match | match | match |
| 115239 | TruSeqV2    | 19:15726487 | synon    | T/T | 7.33E-15 | 75  | 99 | 13 | 39 | 1/1 | 1/1 | 1/1 | match | match | match |
| 132306 | Agilent38MB | 19:15726487 | synon    | G/T | 3.33E-15 | 9   | 89 | 25 | 99 | 0/1 | 0/1 | 0/1 | match | match | match |
| 163383 | TruSeqV2    | 19:15726487 | synon    | T/T | 4.06E-14 | 92  | 99 | 19 | 57 | 1/1 | 1/1 | 1/1 | match | match | match |
| 198564 | Agilent38MB | 19:15726487 | synon    | T/T | 2.57E-12 | 35  | 99 | 28 | 84 | 1/1 | 1/1 | 1/1 | match | match | match |
| 108971 | TruSeqV2    | 19:15728933 | synon    | C/C | 4.44E-16 | 191 | 99 | 30 | 87 | 0/0 | 0/0 | 0/0 | match | match | match |
| 115239 | TruSeqV2    | 19:15728933 | synon    | C/C | 2.22E-16 | 105 | 99 | 37 | 99 | 0/0 | 0/0 | 0/0 | match | match | match |
| 132306 | Agilent38MB | 19:15728933 | synon    | C/C | 2.22E-16 | 16  | 45 | 26 | 59 | 0/0 | 0/0 | 0/0 | match | match | match |
| 163383 | TruSeqV2    | 19:15728933 | synon    | C/C | 2.22E-16 | 177 | 99 | 37 | 96 | 0/0 | 0/0 | 0/0 | match | match | match |
| 198564 | Agilent38MB | 19:15728933 | synon    | C/C | 2.22E-16 | 23  | 60 | 32 | 87 | 0/0 | 0/0 | 0/0 | match | match | match |
| 108971 | TruSeqV2    | 19:15730331 | missense | A/A | 2.22E-16 | 274 | 99 | 57 | 99 | 0/0 | 0/0 | 0/0 | match | match | match |
| 115239 | TruSeqV2    | 19:15730331 | missense | A/A | 1.13E-14 | 183 | 99 | 26 | 66 | 0/0 | 0/0 | 0/0 | match | match | match |
| 132306 | Agilent38MB | 19:15730331 | missense | A/A | 4.00E-15 | 10  | 27 | 43 | 99 | 0/0 | 0/0 | 0/0 | match | match | match |
| 163383 | TruSeqV2    | 19:15730331 | missense | A/A | 2.22E-15 | 265 | 99 | 33 | 81 | 0/0 | 0/0 | 0/0 | match | match | match |
| 198564 | Agilent38MB | 19:15730331 | missense | A/A | 2.22E-16 | 13  | 33 | 32 | 90 | 0/0 | 0/0 | 0/0 | match | match | match |
| 108971 | TruSeqV2    | 19:15739230 | stop     | C/C | 2.22E-16 | 205 | 99 | 31 | 81 | 0/0 | 0/0 | 0/0 | match | match | match |
| 115239 | TruSeqV2    | 19:15739230 | stop     | C/C | 4.44E-16 | 133 | 99 | 9  | 27 | 0/0 | 0/0 | 0/0 | match | match | match |
| 132306 | Agilent38MB | 19:15739230 | stop     | C/C | 2.22E-16 | 12  | 36 | 31 | 90 | 0/0 | 0/0 | 0/0 | match | match | match |
| 163383 | TruSeqV2    | 19:15739230 | stop     | C/C | 6.66E-16 | 156 | 99 | 25 | 63 | 0/0 | 0/0 | 0/0 | match | match | match |
| 198564 | Agilent38MB | 19:15739230 | stop     | C/C | 2.22E-16 | 34  | 84 | 30 | 89 | 0/0 | 0/0 | 0/0 | match | match | match |
| 108971 | TruSeqV2    | 19:15739597 | synon    | C/C | 4.88E-15 | 74  | 99 | 26 | 78 | 1/1 | 1/1 | 1/1 | match | match | match |
| 115239 | TruSeqV2    | 19:15739597 | synon    | C/C | 5.11E-15 | 65  | 99 | 14 | 42 | 1/1 | 1/1 | 1/1 | match | match | match |
| 132306 | Agilent38MB | 19:15739597 | synon    | C/C | 2.66E-15 | 20  | 60 | 29 | 87 | 1/1 | 1/1 | 1/1 | match | match | match |
| 163383 | TruSeqV2    | 19:15739597 | synon    | A/C | 6.85E-13 | 68  | 99 | 20 | 99 | 0/1 | 0/1 | 0/1 | match | match | match |
| 198564 | Agilent38MB | 19:15739597 | synon    | A/C | 1.07E-14 | 41  | 99 | 35 | 99 | 0/1 | 0/1 | 0/1 | match | match | match |



|        |             |             |          |     |          |     |    |    |    |     |     |     |       |       |       |
|--------|-------------|-------------|----------|-----|----------|-----|----|----|----|-----|-----|-----|-------|-------|-------|
| 108971 | TruSeqV2    | 19:15740220 | 3'UTR    | T/T | 4.44E-16 | 124 | 99 | 39 | 99 | 1/1 | 1/1 | 1/1 | match | match | match |
| 115239 | TruSeqV2    | 19:15740220 | 3'UTR    | T/T | 1.55E-15 | 71  | 99 | 21 | 63 | 1/1 | 1/1 | 1/1 | match | match | match |
| 132306 | Agilent38MB | 19:15740220 | 3'UTR    | T/T | 1.11E-15 | 2   | 6  | 27 | 81 | 1/1 | 1/1 | 1/1 | match | match | match |
| 163383 | TruSeqV2    | 19:15740220 | 3'UTR    | C/T | 1.11E-15 | 95  | 99 | 41 | 99 | 0/1 | 0/1 | 0/1 | match | match | match |
| 108971 | TruSeqV2    | 19:15752365 | missense | G/G | 4.44E-16 | 124 | 99 | 32 | 66 | 0/0 | 0/0 | 0/0 | match | match | match |
| 115239 | TruSeqV2    | 19:15752365 | missense | G/G | 2.22E-16 | 55  | 99 | 13 | 36 | 0/0 | 0/0 | 0/0 | match | match | match |
| 132306 | Agilent38MB | 19:15752365 | missense | G/G | 4.44E-16 | 79  | 99 | 30 | 66 | 0/0 | 0/0 | 0/0 | match | match | match |
| 163383 | TruSeqV2    | 19:15752365 | missense | G/G | 2.22E-16 | 71  | 99 | 34 | 87 | 0/0 | 0/0 | 0/0 | match | match | match |
| 198564 | Agilent38MB | 19:15752365 | missense | G/G | 1.11E-15 | 166 | 99 | 43 | 99 | 0/0 | 0/0 | 0/0 | match | match | match |
| 108971 | TruSeqV2    | 19:15756540 | synon    | G/G | 1.78E-15 | 140 | 99 | 35 | 93 | 0/0 | 0/0 | 0/0 | match | match | match |
| 115239 | TruSeqV2    | 19:15756540 | synon    | G/G | 6.66E-16 | 82  | 99 | 39 | 99 | 0/0 | 0/0 | 0/0 | match | match | match |
| 132306 | Agilent38MB | 19:15756540 | synon    | G/G | 5.77E-15 | 126 | 99 | 37 | 99 | 0/0 | 0/0 | 0/0 | match | match | match |
| 163383 | TruSeqV2    | 19:15756540 | synon    | G/G | 1.11E-15 | 109 | 99 | 47 | 99 | 0/0 | 0/0 | 0/0 | match | match | match |
| 198564 | Agilent38MB | 19:15756540 | synon    | G/G | 4.44E-16 | 198 | 99 | 42 | 99 | 0/0 | 0/0 | 0/0 | match | match | match |
| 108971 | TruSeqV2    | 19:15756618 | missense | C/C | 6.66E-16 | 178 | 99 | 42 | 99 | 0/0 | 0/0 | 0/0 | match | match | match |
| 115239 | TruSeqV2    | 19:15756618 | missense | C/C | 2.22E-16 | 107 | 99 | 23 | 51 | 0/0 | 0/0 | 0/0 | match | match | match |
| 132306 | Agilent38MB | 19:15756618 | missense | C/C | 2.22E-16 | 62  | 99 | 39 | 90 | 0/0 | 0/0 | 0/0 | match | match | match |
| 163383 | TruSeqV2    | 19:15756618 | missense | C/C | 2.22E-16 | 137 | 99 | 41 | 99 | 0/0 | 0/0 | 0/0 | match | match | match |
| 198564 | Agilent38MB | 19:15756618 | missense | C/C | 1.33E-15 | 111 | 99 | 37 | 93 | 0/0 | 0/0 | 0/0 | match | match | match |
| 108971 | TruSeqV2    | 19:15758097 | missense | A/A | 2.22E-16 | 265 | 99 | 40 | 99 | 0/0 | 0/0 | 0/0 | match | match | match |
| 115239 | TruSeqV2    | 19:15758097 | missense | A/A | 4.44E-16 | 171 | 99 | 19 | 51 | 0/0 | 0/0 | 0/0 | match | match | match |
| 132306 | Agilent38MB | 19:15758097 | missense | A/A | 2.22E-16 | 209 | 99 | 41 | 99 | 0/0 | 0/0 | 0/0 | match | match | match |
| 163383 | TruSeqV2    | 19:15758097 | missense | A/A | 2.22E-16 | 228 | 99 | 49 | 99 | 0/0 | 0/0 | 0/0 | match | match | match |
| 198564 | Agilent38MB | 19:15758097 | missense | A/A | 4.44E-16 | 386 | 99 | 58 | 99 | 0/0 | 0/0 | 0/0 | match | match | match |
| 115239 | TruSeqV2    | 19:15760053 | synon    | G/G | 5.11E-15 | 116 | 99 | 22 | 57 | 0/0 | 0/0 | 0/0 | match | match | match |
| 132306 | Agilent38MB | 19:15760053 | synon    | G/G | 2.69E-13 | 316 | 99 | 25 | 60 | 0/0 | 0/0 | 0/0 | match | match | match |
| 198564 | Agilent38MB | 19:15760053 | synon    | G/G | 6.71E-13 | 614 | 99 | 37 | 67 | 0/0 | 0/0 | 0/0 | match | match | match |
| 108971 | TruSeqV2    | 19:15763691 | synon    | A/G | 4.38E-10 | 240 | 99 | 37 | 99 | 0/1 | 0/1 | 0/1 | match | match | match |
| 115239 | TruSeqV2    | 19:15763691 | synon    | G/G | 1.78E-15 | 133 | 99 | 30 | 9  | 0/0 | 0/0 | 0/0 | match | match | match |
| 132306 | Agilent38MB | 19:15763691 | synon    | G/G | 1.31E-14 | 132 | 99 | 42 | 99 | 0/0 | 0/0 | 0/0 | match | match | match |
| 163383 | TruSeqV2    | 19:15763691 | synon    | G/G | 1.54E-08 | 152 | 99 | 40 | 99 | 0/0 | 0/0 | 0/0 | match | match | match |
| 198564 | Agilent38MB | 19:15763691 | synon    | G/G | 6.66E-16 | 254 | 99 | 42 | 99 | 0/0 | 0/0 | 0/0 | match | match | match |
| 108971 | TruSeqV2    | 19:15763721 | synon    | G/G | 6.66E-16 | 223 | 99 | 42 | 99 | 0/0 | 0/0 | 0/0 | match | match | match |
| 115239 | TruSeqV2    | 19:15763721 | synon    | G/G | 6.66E-16 | 141 | 99 | 30 | 68 | 0/0 | 0/0 | 0/0 | match | match | match |
| 132306 | Agilent38MB | 19:15763721 | synon    | A/G | 2.79E-12 | 169 | 99 | 32 | 99 | 0/1 | 0/1 | 0/1 | match | match | match |
| 163383 | TruSeqV2    | 19:15763721 | synon    | A/G | 2.99E-08 | 146 | 99 | 38 | 99 | 0/1 | 0/1 | 0/1 | match | match | match |
| 198564 | Agilent38MB | 19:15763721 | synon    | A/G | 2.99E-07 | 326 | 99 | 43 | 99 | 0/1 | 0/1 | 0/1 | match | match | match |
| 108971 | TruSeqV2    | 19:15789098 | missense | G/G | 6.66E-16 | 184 | 99 | 45 | 99 | 1/1 | 1/1 | 1/1 | match | match | match |

|        |             |             |          |     |          |     |    |    |    |     |     |     |       |       |       |
|--------|-------------|-------------|----------|-----|----------|-----|----|----|----|-----|-----|-----|-------|-------|-------|
| 115239 | TruSeqV2    | 19:15789098 | missense | G/G | 1.55E-15 | 102 | 99 | 34 | 99 | 1/1 | 1/1 | 1/1 | match | match | match |
| 132306 | Agilent38MB | 19:15789098 | missense | G/G | 4.44E-16 | 115 | 99 | 45 | 99 | 1/1 | 1/1 | 1/1 | match | match | match |
| 163383 | TruSeqV2    | 19:15789098 | missense | G/G | 1.11E-15 | 128 | 99 | 34 | 99 | 1/1 | 1/1 | 1/1 | match | match | match |
| 198564 | Agilent38MB | 19:15789098 | missense | G/G | 3.24E-13 | 248 | 99 | 31 | 93 | 1/1 | 1/1 | 1/1 | match | match | match |
| 108971 | TruSeqV2    | 19:15789140 | missense | G/G | 3.02E-14 | 203 | 99 | 40 | 99 | 1/1 | 1/1 | 1/1 | match | match | match |
| 115239 | TruSeqV2    | 19:15789140 | missense | G/G | 1.55E-14 | 118 | 99 | 34 | 99 | 1/1 | 1/1 | 1/1 | match | match | match |
| 132306 | Agilent38MB | 19:15789140 | missense | G/G | 6.66E-16 | 131 | 99 | 37 | 99 | 1/1 | 1/1 | 1/1 | match | match | match |
| 163383 | TruSeqV2    | 19:15789140 | missense | G/G | 6.66E-16 | 163 | 99 | 35 | 99 | 1/1 | 1/1 | 1/1 | match | match | match |
| 198564 | Agilent38MB | 19:15789140 | missense | G/G | 1.69E-14 | 256 | 99 | 33 | 98 | 1/1 | 1/1 | 1/1 | match | match | match |
| 108971 | TruSeqV2    | 19:15794463 | missense | G/G | 6.66E-16 | 180 | 99 | 53 | 99 | 0/0 | 0/0 | 0/0 | match | match | match |
| 115239 | TruSeqV2    | 19:15794463 | missense | G/G | 2.22E-16 | 140 | 99 | 25 | 51 | 0/0 | 0/0 | 0/0 | match | match | match |
| 132306 | Agilent38MB | 19:15794463 | missense | G/G | 2.22E-16 | 119 | 99 | 43 | 90 | 0/0 | 0/0 | 0/0 | match | match | match |
| 163383 | TruSeqV2    | 19:15794463 | missense | G/G | 2.22E-16 | 191 | 99 | 37 | 96 | 0/0 | 0/0 | 0/0 | match | match | match |
| 198564 | Agilent38MB | 19:15794463 | missense | G/G | 8.88E-16 | 217 | 99 | 38 | 99 | 0/0 | 0/0 | 0/0 | match | match | match |
| 108971 | TruSeqV2    | 19:15806846 | missense | A/A | 4.44E-16 | 158 | 99 | 38 | 99 | 0/0 | 0/0 | 0/0 | match | match | match |
| 115239 | TruSeqV2    | 19:15806846 | missense | A/A | 6.66E-16 | 95  | 99 | 31 | 84 | 0/0 | 0/0 | 0/0 | match | match | match |
| 132306 | Agilent38MB | 19:15806846 | missense | A/A | 4.44E-16 | 103 | 99 | 23 | 69 | 0/0 | 0/0 | 0/0 | match | match | match |
| 163383 | TruSeqV2    | 19:15806846 | missense | A/A | 6.66E-16 | 99  | 99 | 35 | 84 | 0/0 | 0/0 | 0/0 | match | match | match |
| 198564 | Agilent38MB | 19:15806846 | missense | A/A | 6.66E-16 | 223 | 99 | 37 | 96 | 0/0 | 0/0 | 0/0 | match | match | match |
| 108971 | TruSeqV2    | 19:15807305 | synon    | T/T | 4.44E-16 | 95  | 99 | 40 | 99 | 0/0 | 0/0 | 0/0 | match | match | match |
| 115239 | TruSeqV2    | 19:15807305 | synon    | T/T | 6.66E-16 | 63  | 99 | 23 | 25 | 0/0 | 0/0 | 0/0 | match | match | match |
| 132306 | Agilent38MB | 19:15807305 | synon    | C/T | 6.88E-15 | 101 | 99 | 44 | 99 | 0/1 | 0/1 | 0/1 | match | match | match |
| 163383 | TruSeqV2    | 19:15807305 | synon    | C/C | 1.67E-14 | 90  | 99 | 34 | 99 | 1/1 | 1/1 | 1/1 | match | match | match |
| 198564 | Agilent38MB | 19:15807305 | synon    | T/T | 2.44E-15 | 227 | 99 | 27 | 78 | 0/0 | 0/0 | 0/0 | match | match | match |
| 108971 | TruSeqV2    | 19:15807830 | synon    | T/T | 1.11E-15 | 170 | 99 | 40 | 98 | 0/0 | 0/0 | 0/0 | match | match | match |
| 115239 | TruSeqV2    | 19:15807830 | synon    | T/T | 6.66E-16 | 123 | 99 | 16 | 14 | 0/0 | 0/0 | 0/0 | match | match | match |
| 132306 | Agilent38MB | 19:15807830 | synon    | C/T | 3.11E-15 | 42  | 99 | 33 | 99 | 0/1 | 0/1 | 0/1 | match | match | match |
| 163383 | TruSeqV2    | 19:15807830 | synon    | C/C | 9.33E-15 | 144 | 99 | 44 | 99 | 1/1 | 1/1 | 1/1 | match | match | match |
| 198564 | Agilent38MB | 19:15807830 | synon    | T/T | 1.33E-15 | 72  | 99 | 52 | 99 | 0/0 | 0/0 | 0/0 | match | match | match |
| 108971 | TruSeqV2    | 19:15990431 | missense | T/C | 2.66E-15 | 218 | 99 | 37 | 99 | 0/1 | 0/1 | 0/1 | match | match | match |
| 115239 | TruSeqV2    | 19:15990431 | missense | T/C | 1.55E-15 | 143 | 99 | 31 | 99 | 0/1 | 0/1 | 0/1 | match | match | match |
| 132306 | Agilent38MB | 19:15990431 | missense | T/C | 3.33E-15 | 262 | 99 | 39 | 99 | 0/1 | 0/1 | 0/1 | match | match | match |
| 163383 | TruSeqV2    | 19:15990431 | missense | C/C | 4.44E-16 | 154 | 99 | 36 | 93 | 0/0 | 0/0 | 0/0 | match | match | match |
| 198564 | Agilent38MB | 19:15990431 | missense | T/C | 2.22E-15 | 522 | 99 | 43 | 99 | 0/1 | 0/1 | 0/1 | match | match | match |
| 108971 | TruSeqV2    | 19:15996820 | synon    | G/G | 8.88E-16 | 204 | 99 | 43 | 99 | 0/0 | 0/0 | 0/0 | match | match | match |
| 115239 | TruSeqV2    | 19:15996820 | synon    | G/A | 1.55E-15 | 132 | 99 | 19 | 99 | 0/1 | 0/1 | 0/1 | match | match | match |
| 132306 | Agilent38MB | 19:15996820 | synon    | G/A | 2.44E-15 | 84  | 99 | 32 | 99 | 0/1 | 0/1 | 0/1 | match | match | match |
| 163383 | TruSeqV2    | 19:15996820 | synon    | G/G | 8.88E-16 | 111 | 99 | 38 | 99 | 0/0 | 0/0 | 0/0 | match | match | match |

|        |             |             |          |     |          |     |    |    |    |     |     |     |       |       |       |
|--------|-------------|-------------|----------|-----|----------|-----|----|----|----|-----|-----|-----|-------|-------|-------|
| 198564 | Agilent38MB | 19:15996820 | synon    | G/A | 3.77E-15 | 201 | 99 | 32 | 99 | 0/1 | 0/1 | 0/1 | match | match | match |
| 108971 | TruSeqV2    | 19:16000319 | missense | G/G | 4.44E-16 | 196 | 99 | 49 | 99 | 0/0 | 0/0 | 0/0 | match | match | match |
| 115239 | TruSeqV2    | 19:16000319 | missense | G/G | 2.22E-16 | 130 | 99 | 18 | 45 | 0/0 | 0/0 | 0/0 | match | match | match |
| 132306 | Agilent38MB | 19:16000319 | missense | G/G | 2.22E-16 | 112 | 99 | 29 | 75 | 0/0 | 0/0 | 0/0 | match | match | match |
| 163383 | TruSeqV2    | 19:16000319 | missense | G/G | 2.22E-16 | 137 | 99 | 33 | 84 | 0/0 | 0/0 | 0/0 | match | match | match |
| 198564 | Agilent38MB | 19:16000319 | missense | G/G | 2.22E-16 | 243 | 99 | 42 | 99 | 0/0 | 0/0 | 0/0 | match | match | match |
| 108971 | TruSeqV2    | 19:16001215 | missense | C/A | 8.74E-13 | 201 | 99 | 35 | 99 | 0/1 | 0/1 | 0/1 | match | match | match |
| 115239 | TruSeqV2    | 19:16001215 | missense | C/C | 6.66E-16 | 176 | 99 | 35 | 87 | 0/0 | 0/0 | 0/0 | match | match | match |
| 132306 | Agilent38MB | 19:16001215 | missense | C/C | 8.88E-16 | 172 | 99 | 30 | 84 | 0/0 | 0/0 | 0/0 | match | match | match |
| 163383 | TruSeqV2    | 19:16001215 | missense | C/A | 1.30E-13 | 174 | 99 | 31 | 99 | 0/1 | 0/1 | 0/1 | match | match | match |
| 198564 | Agilent38MB | 19:16001215 | missense | C/C | 3.55E-15 | 361 | 99 | 43 | 99 | 0/0 | 0/0 | 0/0 | match | match | match |
| 108971 | TruSeqV2    | 19:16003388 | synon    | G/G | 2.22E-16 | 224 | 99 | 29 | 75 | 0/0 | 0/0 | 0/0 | match | match | match |
| 115239 | TruSeqV2    | 19:16003388 | synon    | G/G | 2.22E-16 | 134 | 99 | 36 | 96 | 0/0 | 0/0 | 0/0 | match | match | match |
| 132306 | Agilent38MB | 19:16003388 | synon    | G/G | 2.22E-16 | 151 | 99 | 31 | 81 | 0/0 | 0/0 | 0/0 | match | match | match |
| 163383 | TruSeqV2    | 19:16003388 | synon    | G/G | 2.22E-16 | 184 | 99 | 27 | 75 | 0/0 | 0/0 | 0/0 | match | match | match |
| 198564 | Agilent38MB | 19:16003388 | synon    | G/G | 4.44E-16 | 268 | 99 | 36 | 99 | 0/0 | 0/0 | 0/0 | match | match | match |
| 108971 | TruSeqV2    | 19:16006323 | synon    | G/G | 1.33E-15 | 55  | 99 | 39 | 90 | 0/0 | 0/0 | 0/0 | match | match | match |
| 115239 | TruSeqV2    | 19:16006323 | synon    | G/G | 1.55E-15 | 22  | 60 | 24 | 63 | 0/0 | 0/0 | 0/0 | match | match | match |
| 132306 | Agilent38MB | 19:16006323 | synon    | G/G | 2.44E-15 | 26  | 60 | 27 | 72 | 0/0 | 0/0 | 0/0 | match | match | match |
| 163383 | TruSeqV2    | 19:16006323 | synon    | G/G | 2.44E-15 | 36  | 99 | 27 | 72 | 0/0 | 0/0 | 0/0 | match | match | match |
| 198564 | Agilent38MB | 19:16006323 | synon    | G/G | 6.66E-16 | 57  | 99 | 34 | 96 | 0/0 | 0/0 | 0/0 | match | match | match |
| 108971 | TruSeqV2    | 19:16006380 | synon    | T/T | 6.66E-16 | 80  | 99 | 28 | 78 | 0/0 | 0/0 | 0/0 | match | match | match |
| 115239 | TruSeqV2    | 19:16006380 | synon    | T/T | 2.22E-16 | 43  | 99 | 23 | 63 | 0/0 | 0/0 | 0/0 | match | match | match |
| 132306 | Agilent38MB | 19:16006380 | synon    | T/T | 4.44E-16 | 22  | 57 | 29 | 84 | 0/0 | 0/0 | 0/0 | match | match | match |
| 163383 | TruSeqV2    | 19:16006380 | synon    | T/T | 2.22E-16 | 58  | 99 | 30 | 67 | 0/0 | 0/0 | 0/0 | match | match | match |
| 198564 | Agilent38MB | 19:16006380 | synon    | T/T | 2.22E-16 | 37  | 90 | 30 | 87 | 0/0 | 0/0 | 0/0 | match | match | match |
| 108971 | TruSeqV2    | 19:16008257 | synon    | T/T | 4.44E-16 | 97  | 99 | 36 | 90 | 0/0 | 0/0 | 0/0 | match | match | match |
| 115239 | TruSeqV2    | 19:16008257 | synon    | T/T | 6.66E-16 | 78  | 99 | 12 | 2  | 0/0 | 0/0 | 0/0 | match | match | match |
| 132306 | Agilent38MB | 19:16008257 | synon    | T/C | 1.11E-15 | 85  | 99 | 22 | 99 | 0/1 | 0/1 | 0/1 | match | match | match |
| 163383 | TruSeqV2    | 19:16008257 | synon    | T/T | 4.44E-16 | 99  | 99 | 33 | 75 | 0/0 | 0/0 | 0/0 | match | match | match |
| 198564 | Agilent38MB | 19:16008257 | synon    | T/T | 3.11E-15 | 199 | 99 | 33 | 84 | 0/0 | 0/0 | 0/0 | match | match | match |
| 108971 | TruSeqV2    | 19:16008384 | missense | G/G | 1.11E-15 | 105 | 99 | 38 | 96 | 0/0 | 0/0 | 0/0 | match | match | match |
| 115239 | TruSeqV2    | 19:16008384 | missense | G/G | 2.22E-16 | 78  | 99 | 8  | 21 | 0/0 | 0/0 | 0/0 | match | match | match |
| 132306 | Agilent38MB | 19:16008384 | missense | G/G | 6.66E-16 | 32  | 69 | 23 | 48 | 0/0 | 0/0 | 0/0 | match | match | match |
| 163383 | TruSeqV2    | 19:16008384 | missense | G/G | 2.22E-16 | 91  | 99 | 28 | 66 | 0/0 | 0/0 | 0/0 | match | match | match |
| 198564 | Agilent38MB | 19:16008384 | missense | G/G | 2.22E-16 | 76  | 99 | 34 | 90 | 0/0 | 0/0 | 0/0 | match | match | match |
| 108971 | TruSeqV2    | 19:16008386 | missense | C/C | 7.33E-15 | 107 | 99 | 40 | 96 | 0/0 | 0/0 | 0/0 | match | match | match |
| 115239 | TruSeqV2    | 19:16008386 | missense | C/C | 4.44E-16 | 79  | 99 | 9  | 21 | 0/0 | 0/0 | 0/0 | match | match | match |

|        |             |             |          |     |             |     |    |    |    |     |     |     |       |       |       |
|--------|-------------|-------------|----------|-----|-------------|-----|----|----|----|-----|-----|-----|-------|-------|-------|
| 132306 | Agilent38MB | 19:16008386 | missense | C/C | 4.44E-16    | 31  | 60 | 23 | 48 | 0/0 | 0/0 | 0/0 | match | match | match |
| 163383 | TruSeqV2    | 19:16008386 | missense | C/C | 6.66E-16    | 91  | 99 | 27 | 63 | 0/0 | 0/0 | 0/0 | match | match | match |
| 198564 | Agilent38MB | 19:16008386 | missense | C/C | 4.44E-16    | 74  | 99 | 36 | 93 | 0/0 | 0/0 | 0/0 | match | match | match |
| 108971 | TruSeqV2    | 19:16008388 | missense | A/A | 0.000509065 | 106 | 99 | 39 | 96 | 0/0 | 0/0 | 0/0 | match | match | match |
| 115239 | TruSeqV2    | 19:16008388 | missense | A/A | 5.55E-11    | 78  | 99 | 9  | 21 | 0/0 | 0/0 | 0/0 | match | match | match |
| 132306 | Agilent38MB | 19:16008388 | missense | C/A | 0.000918265 | 28  | 99 | 23 | 99 | 0/1 | 0/1 | 0/1 | match | match | match |
| 163383 | TruSeqV2    | 19:16008388 | missense | A/A | 8.12E-09    | 88  | 99 | 25 | 59 | 0/0 | 0/0 | 0/0 | match | match | match |
| 198564 | Agilent38MB | 19:16008388 | missense | A/A | 1.01E-10    | 72  | 99 | 35 | 93 | 0/0 | 0/0 | 0/0 | match | match | match |
| 108971 | TruSeqV2    | 19:16025176 | missense | T/T | 2.89E-15    | 83  | 99 | 38 | 99 | 1/1 | 1/1 | 1/1 | match | match | match |
| 115239 | TruSeqV2    | 19:16025176 | missense | T/T | 7.33E-15    | 56  | 99 | 18 | 54 | 1/1 | 1/1 | 1/1 | match | match | match |
| 132306 | Agilent38MB | 19:16025176 | missense | T/C | 1.33E-15    | 96  | 99 | 30 | 99 | 0/1 | 0/1 | 0/1 | match | match | match |
| 163383 | TruSeqV2    | 19:16025176 | missense | T/T | 3.77E-14    | 64  | 99 | 35 | 99 | 1/1 | 1/1 | 1/1 | match | match | match |
| 198564 | Agilent38MB | 19:16025176 | missense | T/T | 2.63E-08    | 155 | 99 | 26 | 78 | 1/1 | 1/1 | 1/1 | match | match | match |
| 108971 | TruSeqV2    | 19:16034714 | missense | G/G | 3.77E-14    | 158 | 99 | 30 | 89 | 1/1 | 1/1 | 1/1 | match | match | match |
| 115239 | TruSeqV2    | 19:16034714 | missense | G/G | 1.78E-15    | 110 | 99 | 29 | 87 | 1/1 | 1/1 | 1/1 | match | match | match |
| 132306 | Agilent38MB | 19:16034714 | missense | G/G | 2.00E-15    | 169 | 99 | 35 | 99 | 1/1 | 1/1 | 1/1 | match | match | match |
| 163383 | TruSeqV2    | 19:16034714 | missense | G/G | 1.55E-15    | 132 | 99 | 32 | 95 | 1/1 | 1/1 | 1/1 | match | match | match |
| 198564 | Agilent38MB | 19:16034714 | missense | G/G | 2.66E-15    | 358 | 99 | 38 | 99 | 1/1 | 1/1 | 1/1 | match | match | match |
| 108971 | TruSeqV2    | 19:16040292 | synon    | G/G | 1.60E-14    | 124 | 99 | 42 | 99 | 1/1 | 1/1 | 1/1 | match | match | match |
| 132306 | Agilent38MB | 19:16040292 | synon    | G/A | 1.33E-15    | 45  | 99 | 34 | 99 | 0/1 | 0/1 | 0/1 | match | match | match |
| 163383 | TruSeqV2    | 19:16040292 | synon    | G/G | 5.24E-14    | 99  | 99 | 18 | 54 | 1/1 | 1/1 | 1/1 | match | match | match |
| 198564 | Agilent38MB | 19:16040292 | synon    | G/G | 2.06E-11    | 99  | 99 | 31 | 92 | 1/1 | 1/1 | 1/1 | match | match | match |
| 108971 | TruSeqV2    | 19:16045141 | synon    | C/C | 1.51E-14    | 178 | 99 | 27 | 80 | 1/1 | 1/1 | 1/1 | match | match | match |
| 115239 | TruSeqV2    | 19:16045141 | synon    | C/C | 5.53E-14    | 138 | 99 | 12 | 36 | 1/1 | 1/1 | 1/1 | match | match | match |
| 132306 | Agilent38MB | 19:16045141 | synon    | C/C | 4.88E-15    | 30  | 90 | 17 | 51 | 1/1 | 1/1 | 1/1 | match | match | match |
| 163383 | TruSeqV2    | 19:16045141 | synon    | C/C | 1.15E-14    | 176 | 99 | 22 | 66 | 1/1 | 1/1 | 1/1 | match | match | match |
| 198564 | Agilent38MB | 19:16045141 | synon    | C/C | 4.15E-14    | 35  | 99 | 22 | 65 | 1/1 | 1/1 | 1/1 | match | match | match |
| 108971 | TruSeqV2    | 19:34175603 | 5'UTR    | C/C | 4.00E-15    | 115 | 99 | 42 | 99 | 0/0 | 0/0 | 0/0 | match | match | match |
| 115239 | TruSeqV2    | 19:34175603 | 5'UTR    | C/C | 1.11E-15    | 74  | 99 | 13 | 39 | 0/0 | 0/0 | 0/0 | match | match | match |
| 163383 | TruSeqV2    | 19:34175603 | 5'UTR    | C/C | 6.66E-16    | 78  | 99 | 26 | 75 | 0/0 | 0/0 | 0/0 | match | match | match |
| 108971 | TruSeqV2    | 19:34176058 | 5'UTR    | T/T | 4.44E-16    | 114 | 99 | 33 | 87 | 0/0 | 0/0 | 0/0 | match | match | match |
| 115239 | TruSeqV2    | 19:34176058 | 5'UTR    | T/T | 6.66E-16    | 81  | 99 | 9  | 24 | 0/0 | 0/0 | 0/0 | match | match | match |
| 132306 | Agilent38MB | 19:34176058 | 5'UTR    | T/T | 4.44E-16    | 2   | 5  | 20 | 54 | 0/0 | 0/0 | 0/0 | match | match | match |
| 163383 | TruSeqV2    | 19:34176058 | 5'UTR    | T/T | 6.66E-16    | 58  | 99 | 25 | 52 | 0/0 | 0/0 | 0/0 | match | match | match |
| 108971 | TruSeqV2    | 19:34264354 | 3'UTR    | A/G | 7.99E-15    | 46  | 99 | 44 | 99 | 0/1 | 0/1 | 0/1 | match | match | match |
| 115239 | TruSeqV2    | 19:34264354 | 3'UTR    | G/G | 4.63E-08    | 19  | 57 | 17 | 42 | 0/0 | 0/0 | 0/0 | match | match | match |
| 163383 | TruSeqV2    | 19:34264354 | 3'UTR    | G/G | 4.51E-14    | 42  | 99 | 35 | 90 | 0/0 | 0/0 | 0/0 | match | match | match |
| 108971 | TruSeqV2    | 19:41349732 | missense | C/C | 6.66E-16    | 593 | 99 | 42 | 99 | 0/0 | 0/0 | 0/0 | match | match | match |

|        |             |             |          |     |          |     |    |    |    |     |     |     |       |       |       |
|--------|-------------|-------------|----------|-----|----------|-----|----|----|----|-----|-----|-----|-------|-------|-------|
| 115239 | TruSeqV2    | 19:41349732 | missense | C/C | 7.33E-15 | 205 | 99 | 16 | 45 | 0/0 | 0/0 | 0/0 | match | match | match |
| 132306 | Agilent38MB | 19:41349732 | missense | C/C | 4.44E-16 | 295 | 99 | 31 | 87 | 0/0 | 0/0 | 0/0 | match | match | match |
| 163383 | TruSeqV2    | 19:41349732 | missense | C/C | 6.66E-16 | 387 | 99 | 33 | 87 | 0/0 | 0/0 | 0/0 | match | match | match |
| 198564 | Agilent38MB | 19:41349732 | missense | C/C | 1.33E-15 | 678 | 99 | 43 | 99 | 0/0 | 0/0 | 0/0 | match | match | match |
| 108971 | TruSeqV2    | 19:41349774 | missense | A/A | 4.44E-16 | 578 | 99 | 44 | 99 | 0/0 | 0/0 | 0/0 | match | match | match |
| 115239 | TruSeqV2    | 19:41349774 | missense | A/A | 2.66E-15 | 225 | 99 | 17 | 48 | 0/0 | 0/0 | 0/0 | match | match | match |
| 132306 | Agilent38MB | 19:41349774 | missense | A/A | 4.44E-16 | 303 | 99 | 46 | 99 | 0/0 | 0/0 | 0/0 | match | match | match |
| 163383 | TruSeqV2    | 19:41349774 | missense | A/A | 4.44E-16 | 403 | 99 | 47 | 99 | 0/0 | 0/0 | 0/0 | match | match | match |
| 198564 | Agilent38MB | 19:41349774 | missense | A/A | 4.44E-16 | 682 | 99 | 56 | 99 | 0/0 | 0/0 | 0/0 | match | match | match |
| 108971 | TruSeqV2    | 19:41350582 | missense | C/C | 4.44E-16 | 152 | 99 | 42 | 85 | 0/0 | 0/0 | 0/0 | match | match | match |
| 115239 | TruSeqV2    | 19:41350582 | missense | C/C | 2.22E-16 | 98  | 99 | 22 | 57 | 0/0 | 0/0 | 0/0 | match | match | match |
| 132306 | Agilent38MB | 19:41350582 | missense | C/C | 4.44E-16 | 50  | 99 | 32 | 93 | 0/0 | 0/0 | 0/0 | match | match | match |
| 163383 | TruSeqV2    | 19:41350582 | missense | C/C | 4.44E-16 | 104 | 99 | 41 | 99 | 0/0 | 0/0 | 0/0 | match | match | match |
| 198564 | Agilent38MB | 19:41350582 | missense | C/C | 2.22E-16 | 124 | 99 | 24 | 66 | 0/0 | 0/0 | 0/0 | match | match | match |
| 108971 | TruSeqV2    | 19:41350996 | intronic | C/C | 1.73E-14 | 6   | 18 | 36 | 96 | 0/0 | 0/0 | 0/0 | match | match | match |
| 115239 | TruSeqV2    | 19:41350996 | intronic | C/C | 2.66E-15 | 3   | 9  | 35 | 93 | 0/0 | 0/0 | 0/0 | match | match | match |
| 132306 | Agilent38MB | 19:41350996 | intronic | C/C | 3.11E-15 | 1   | 3  | 36 | 99 | 0/0 | 0/0 | 0/0 | match | match | match |
| 163383 | TruSeqV2    | 19:41350996 | intronic | T/C | 1.64E-14 | 3   | 31 | 37 | 99 | 0/1 | 0/1 | 0/1 | match | match | match |
| 198564 | Agilent38MB | 19:41350996 | intronic | C/C | 4.86E-14 | 3   | 9  | 36 | 87 | 0/0 | 0/0 | 0/0 | match | match | match |
| 108971 | TruSeqV2    | 19:41351200 | fs       | A/A | 9.33E-15 | 104 | 99 | 21 | 57 | 0/0 | 0/0 | 0/0 | match | match | match |
| 115239 | TruSeqV2    | 19:41351200 | fs       | A/A | 1.78E-15 | 104 | 99 | 21 | 57 | 0/0 | 0/0 | 0/0 | match | match | match |
| 132306 | Agilent38MB | 19:41351200 | fs       | A/A | 8.88E-16 | 104 | 99 | 21 | 57 | 0/0 | 0/0 | 0/0 | match | match | match |
| 163383 | TruSeqV2    | 19:41351200 | fs       | A/A | 2.00E-15 | 104 | 99 | 21 | 57 | 0/0 | 0/0 | 0/0 | match | match | match |
| 198564 | Agilent38MB | 19:41351200 | fs       | A/A | 5.06E-13 | 104 | 99 | 21 | 57 | 0/0 | 0/0 | 0/0 | match | match | match |
| 108971 | TruSeqV2    | 19:41351267 | missense | C/C | 1.55E-15 | 186 | 99 | 32 | 96 | 0/0 | 0/0 | 0/0 | match | match | match |
| 115239 | TruSeqV2    | 19:41351267 | missense | C/C | 4.22E-15 | 166 | 99 | 33 | 93 | 0/0 | 0/0 | 0/0 | match | match | match |
| 132306 | Agilent38MB | 19:41351267 | missense | C/C | 6.66E-16 | 268 | 99 | 25 | 72 | 0/0 | 0/0 | 0/0 | match | match | match |
| 163383 | TruSeqV2    | 19:41351267 | missense | C/C | 1.55E-15 | 169 | 99 | 33 | 93 | 0/0 | 0/0 | 0/0 | match | match | match |
| 198564 | Agilent38MB | 19:41351267 | missense | C/C | 2.89E-15 | 415 | 99 | 48 | 99 | 0/0 | 0/0 | 0/0 | match | match | match |
| 108971 | TruSeqV2    | 19:41351967 | synon    | T/T | 4.44E-16 | 80  | 99 | 37 | 99 | 0/0 | 0/0 | 0/0 | match | match | match |
| 115239 | TruSeqV2    | 19:41351967 | synon    | T/T | 2.22E-16 | 59  | 99 | 19 | 48 | 0/0 | 0/0 | 0/0 | match | match | match |
| 132306 | Agilent38MB | 19:41351967 | synon    | T/T | 4.44E-16 | 102 | 99 | 28 | 72 | 0/0 | 0/0 | 0/0 | match | match | match |
| 163383 | TruSeqV2    | 19:41351967 | synon    | T/T | 2.22E-16 | 70  | 99 | 25 | 66 | 0/0 | 0/0 | 0/0 | match | match | match |
| 198564 | Agilent38MB | 19:41351967 | synon    | T/T | 8.88E-16 | 186 | 99 | 36 | 93 | 0/0 | 0/0 | 0/0 | match | match | match |
| 108971 | TruSeqV2    | 19:41352762 | intronic | G/G | 4.44E-16 | 154 | 99 | 41 | 99 | 0/0 | 0/0 | 0/0 | match | match | match |
| 115239 | TruSeqV2    | 19:41352762 | intronic | G/G | 5.44E-14 | 88  | 36 | 29 | 66 | 0/0 | 0/0 | 0/0 | match | match | match |
| 132306 | Agilent38MB | 19:41352762 | intronic | G/G | 4.44E-16 | 90  | 99 | 36 | 84 | 0/0 | 0/0 | 0/0 | match | match | match |
| 163383 | TruSeqV2    | 19:41352762 | intronic | G/C | 2.11E-14 | 128 | 99 | 41 | 99 | 0/1 | 0/1 | 0/1 | match | match | match |

|        |             |             |          |       |          |     |    |    |    |     |     |     |       |       |       |
|--------|-------------|-------------|----------|-------|----------|-----|----|----|----|-----|-----|-----|-------|-------|-------|
| 198564 | Agilent38MB | 19:41352762 | intronic | G/G   | 3.55E-15 | 180 | 99 | 53 | 99 | 0/0 | 0/0 | 0/0 | match | match | match |
| 108971 | TruSeqV2    | 19:41352912 | synon    | T/T   | 8.67E-13 | 269 | 99 | 39 | 99 | 0/0 | 0/0 | 0/0 | match | match | match |
| 115239 | TruSeqV2    | 19:41352912 | synon    | T/T   | 2.71E-13 | 166 | 99 | 25 | 57 | 0/0 | 0/0 | 0/0 | match | match | match |
| 132306 | Agilent38MB | 19:41352912 | synon    | T/T   | 3.89E-14 | 87  | 99 | 34 | 84 | 0/0 | 0/0 | 0/0 | match | match | match |
| 163383 | TruSeqV2    | 19:41352912 | synon    | T/T   | 5.11E-14 | 245 | 99 | 29 | 78 | 0/0 | 0/0 | 0/0 | match | match | match |
| 198564 | Agilent38MB | 19:41352912 | synon    | T/T   | 1.33E-14 | 176 | 99 | 36 | 99 | 0/0 | 0/0 | 0/0 | match | match | match |
| 108971 | TruSeqV2    | 19:41352941 | missense | A/A   | 2.22E-16 | 246 | 99 | 26 | 57 | 0/0 | 0/0 | 0/0 | match | match | match |
| 115239 | TruSeqV2    | 19:41352941 | missense | A/A   | 2.22E-16 | 146 | 99 | 12 | 21 | 0/0 | 0/0 | 0/0 | match | match | match |
| 132306 | Agilent38MB | 19:41352941 | missense | A/A   | 2.22E-16 | 75  | 99 | 22 | 60 | 0/0 | 0/0 | 0/0 | match | match | match |
| 163383 | TruSeqV2    | 19:41352941 | missense | A/A   | 2.22E-16 | 188 | 99 | 26 | 72 | 0/0 | 0/0 | 0/0 | match | match | match |
| 198564 | Agilent38MB | 19:41352941 | missense | A/A   | 4.44E-16 | 137 | 99 | 30 | 66 | 0/0 | 0/0 | 0/0 | match | match | match |
| 108971 | TruSeqV2    | 19:41354190 | fs       | AA/AA | 2.22E-16 | 218 | 99 | 35 | 76 | 0/0 | 0/0 | 0/0 | match | match | match |
| 115239 | TruSeqV2    | 19:41354190 | fs       | AA/AA | 1.55E-15 | 218 | 99 | 35 | 76 | 0/0 | 0/0 | 0/0 | match | match | match |
| 132306 | Agilent38MB | 19:41354190 | fs       | AA/AA | 4.44E-16 | 218 | 99 | 35 | 76 | 0/0 | 0/0 | 0/0 | match | match | match |
| 163383 | TruSeqV2    | 19:41354190 | fs       | AA/AA | 4.44E-16 | 218 | 99 | 35 | 76 | 0/0 | 0/0 | 0/0 | match | match | match |
| 198564 | Agilent38MB | 19:41354190 | fs       | AA/AA | 1.13E-14 | 218 | 99 | 35 | 76 | 0/0 | 0/0 | 0/0 | match | match | match |
| 108971 | TruSeqV2    | 19:41354458 | intronic | C/C   | 7.44E-08 | 50  | 99 | 34 | 99 | 0/0 | 0/0 | 0/0 | match | match | match |
| 115239 | TruSeqV2    | 19:41354458 | intronic | C/C   | 6.37E-08 | 28  | 72 | 12 | 27 | 0/0 | 0/0 | 0/0 | match | match | match |
| 132306 | Agilent38MB | 19:41354458 | intronic | C/C   | 3.15E-09 | 21  | 63 | 28 | 69 | 0/0 | 0/0 | 0/0 | match | match | match |
| 163383 | TruSeqV2    | 19:41354458 | intronic | C/C   | 8.28E-08 | 32  | 84 | 34 | 96 | 0/0 | 0/0 | 0/0 | match | match | match |
| 198564 | Agilent38MB | 19:41354458 | intronic | C/C   | 5.18E-07 | 41  | 99 | 33 | 87 | 0/0 | 0/0 | 0/0 | match | match | match |
| 108971 | TruSeqV2    | 19:41354533 | missense | A/A   | 1.55E-15 | 79  | 99 | 36 | 96 | 0/0 | 0/0 | 0/0 | match | match | match |
| 115239 | TruSeqV2    | 19:41354533 | missense | A/A   | 2.89E-15 | 49  | 99 | 2  | 6  | 0/0 | 0/0 | 0/0 | match | match | match |
| 132306 | Agilent38MB | 19:41354533 | missense | A/A   | 2.00E-15 | 43  | 99 | 33 | 90 | 0/0 | 0/0 | 0/0 | match | match | match |
| 163383 | TruSeqV2    | 19:41354533 | missense | A/A   | 2.22E-15 | 45  | 99 | 32 | 78 | 0/0 | 0/0 | 0/0 | match | match | match |
| 198564 | Agilent38MB | 19:41354533 | missense | A/A   | 8.88E-16 | 119 | 99 | 35 | 87 | 0/0 | 0/0 | 0/0 | match | match | match |
| 108971 | TruSeqV2    | 19:41354629 | missense | C/C   | 6.66E-16 | 127 | 99 | 36 | 93 | 0/0 | 0/0 | 0/0 | match | match | match |
| 115239 | TruSeqV2    | 19:41354629 | missense | C/C   | 8.88E-16 | 55  | 99 | 6  | 15 | 0/0 | 0/0 | 0/0 | match | match | match |
| 132306 | Agilent38MB | 19:41354629 | missense | C/C   | 4.44E-16 | 28  | 66 | 29 | 75 | 0/0 | 0/0 | 0/0 | match | match | match |
| 163383 | TruSeqV2    | 19:41354629 | missense | C/C   | 4.44E-16 | 75  | 99 | 22 | 51 | 0/0 | 0/0 | 0/0 | match | match | match |
| 198564 | Agilent38MB | 19:41354629 | missense | C/C   | 4.44E-16 | 56  | 99 | 26 | 75 | 0/0 | 0/0 | 0/0 | match | match | match |
| 108971 | TruSeqV2    | 19:41356281 | synon    | C/C   | 1.78E-15 | 165 | 99 | 26 | 78 | 1/1 | 1/1 | 1/1 | match | match | match |
| 115239 | TruSeqV2    | 19:41356281 | synon    | C/C   | 6.66E-16 | 108 | 99 | 21 | 19 | 1/1 | 1/1 | 1/1 | match | match | match |
| 132306 | Agilent38MB | 19:41356281 | synon    | C/C   | 2.22E-15 | 154 | 99 | 30 | 90 | 1/1 | 1/1 | 1/1 | match | match | match |
| 163383 | TruSeqV2    | 19:41356281 | synon    | C/C   | 8.88E-16 | 121 | 99 | 27 | 81 | 1/1 | 1/1 | 1/1 | match | match | match |
| 198564 | Agilent38MB | 19:41356281 | synon    | C/C   | 8.88E-16 | 344 | 99 | 26 | 77 | 1/1 | 1/1 | 1/1 | match | match | match |
| 108971 | TruSeqV2    | 19:41356310 | synon    | G/G   | 1.21E-09 | 158 | 99 | 27 | 78 | 0/0 | 0/0 | 0/0 | match | match | match |
| 115239 | TruSeqV2    | 19:41356310 | synon    | G/G   | 1.43E-11 | 106 | 99 | 27 | 78 | 0/0 | 0/0 | 0/0 | match | match | match |

|        |             |             |          |     |          |     |    |    |    |     |     |     |       |       |       |
|--------|-------------|-------------|----------|-----|----------|-----|----|----|----|-----|-----|-----|-------|-------|-------|
| 132306 | Agilent38MB | 19:41356310 | synon    | G/G | 4.38E-13 | 151 | 99 | 29 | 87 | 0/0 | 0/0 | 0/0 | match | match | match |
| 163383 | TruSeqV2    | 19:41356310 | synon    | G/G | 1.06E-11 | 122 | 99 | 32 | 93 | 0/0 | 0/0 | 0/0 | match | match | match |
| 198564 | Agilent38MB | 19:41356310 | synon    | G/G | 9.81E-09 | 354 | 99 | 32 | 90 | 0/0 | 0/0 | 0/0 | match | match | match |
| 108971 | TruSeqV2    | 19:41356319 | missense | C/C | 4.44E-16 | 151 | 99 | 28 | 72 | 0/0 | 0/0 | 0/0 | match | match | match |
| 115239 | TruSeqV2    | 19:41356319 | missense | C/C | 2.22E-16 | 104 | 99 | 29 | 69 | 0/0 | 0/0 | 0/0 | match | match | match |
| 132306 | Agilent38MB | 19:41356319 | missense | C/C | 4.44E-16 | 150 | 99 | 32 | 75 | 0/0 | 0/0 | 0/0 | match | match | match |
| 163383 | TruSeqV2    | 19:41356319 | missense | C/C | 2.22E-16 | 119 | 99 | 33 | 78 | 0/0 | 0/0 | 0/0 | match | match | match |
| 198564 | Agilent38MB | 19:41356319 | missense | C/C | 4.44E-16 | 328 | 99 | 36 | 93 | 0/0 | 0/0 | 0/0 | match | match | match |
| 108971 | TruSeqV2    | 19:41356379 | promoter | A/A | 4.44E-16 | 129 | 99 | 38 | 99 | 0/0 | 0/0 | 0/0 | match | match | match |
| 115239 | TruSeqV2    | 19:41356379 | promoter | A/A | 4.44E-16 | 91  | 99 | 29 | 72 | 0/0 | 0/0 | 0/0 | match | match | match |
| 132306 | Agilent38MB | 19:41356379 | promoter | A/A | 8.88E-16 | 48  | 93 | 28 | 78 | 0/0 | 0/0 | 0/0 | match | match | match |
| 163383 | TruSeqV2    | 19:41356379 | promoter | A/A | 4.44E-16 | 128 | 99 | 30 | 72 | 0/0 | 0/0 | 0/0 | match | match | match |
| 198564 | Agilent38MB | 19:41356379 | promoter | A/A | 4.44E-16 | 90  | 99 | 40 | 99 | 0/0 | 0/0 | 0/0 | match | match | match |
| 108971 | TruSeqV2    | 19:41381501 | 3'UTR    | T/T | 4.71E-14 | 168 | 99 | 23 | 54 | 0/0 | 0/0 | 0/0 | match | match | match |
| 115239 | TruSeqV2    | 19:41381501 | 3'UTR    | T/T | 1.66E-12 | 241 | 99 | 20 | 39 | 0/0 | 0/0 | 0/0 | match | match | match |
| 132306 | Agilent38MB | 19:41381501 | 3'UTR    | T/T | 1.24E-12 | 9   | 27 | 20 | 48 | 0/0 | 0/0 | 0/0 | match | match | match |
| 163383 | TruSeqV2    | 19:41381501 | 3'UTR    | T/T | 2.48E-13 | 254 | 99 | 35 | 69 | 0/0 | 0/0 | 0/0 | match | match | match |
| 198564 | Agilent38MB | 19:41381501 | 3'UTR    | T/T | 1.57E-10 | 10  | 24 | 22 | 57 | 0/0 | 0/0 | 0/0 | match | match | match |
| 108971 | TruSeqV2    | 19:41381503 | 3'UTR    | C/C | 1.55E-15 | 184 | 99 | 26 | 63 | 0/0 | 0/0 | 0/0 | match | match | match |
| 115239 | TruSeqV2    | 19:41381503 | 3'UTR    | C/C | 6.22E-15 | 263 | 99 | 20 | 45 | 0/0 | 0/0 | 0/0 | match | match | match |
| 132306 | Agilent38MB | 19:41381503 | 3'UTR    | C/C | 1.11E-15 | 9   | 27 | 19 | 51 | 0/0 | 0/0 | 0/0 | match | match | match |
| 163383 | TruSeqV2    | 19:41381503 | 3'UTR    | C/C | 3.11E-15 | 271 | 99 | 34 | 65 | 0/0 | 0/0 | 0/0 | match | match | match |
| 198564 | Agilent38MB | 19:41381503 | 3'UTR    | C/C | 4.76E-12 | 11  | 30 | 22 | 60 | 0/0 | 0/0 | 0/0 | match | match | match |
| 108971 | TruSeqV2    | 19:41381510 | 3'UTR    | T/T | 4.88E-15 | 172 | 99 | 25 | 63 | 0/0 | 0/0 | 0/0 | match | match | match |
| 115239 | TruSeqV2    | 19:41381510 | 3'UTR    | T/T | 1.95E-14 | 239 | 99 | 17 | 36 | 0/0 | 0/0 | 0/0 | match | match | match |
| 163383 | TruSeqV2    | 19:41381510 | 3'UTR    | T/T | 6.66E-16 | 243 | 99 | 30 | 75 | 0/0 | 0/0 | 0/0 | match | match | match |
| 198564 | Agilent38MB | 19:41381510 | 3'UTR    | T/T | 6.66E-16 | 10  | 27 | 24 | 66 | 0/0 | 0/0 | 0/0 | match | match | match |
| 108971 | TruSeqV2    | 19:41381517 | 3'UTR    | A/A | 2.22E-16 | 146 | 99 | 18 | 54 | 0/0 | 0/0 | 0/0 | match | match | match |
| 115239 | TruSeqV2    | 19:41381517 | 3'UTR    | A/A | 2.22E-16 | 197 | 99 | 17 | 8  | 0/0 | 0/0 | 0/0 | match | match | match |
| 132306 | Agilent38MB | 19:41381517 | 3'UTR    | A/A | 2.22E-16 | 16  | 42 | 23 | 36 | 0/0 | 0/0 | 0/0 | match | match | match |
| 163383 | TruSeqV2    | 19:41381517 | 3'UTR    | A/A | 2.22E-16 | 198 | 41 | 26 | 69 | 0/0 | 0/0 | 0/0 | match | match | match |
| 198564 | Agilent38MB | 19:41381517 | 3'UTR    | A/A | 1.55E-15 | 15  | 25 | 22 | 65 | 0/0 | 0/0 | 0/0 | match | match | match |
| 108971 | TruSeqV2    | 19:41381538 | 3'UTR    | C/C | 2.22E-15 | 209 | 99 | 23 | 63 | 0/0 | 0/0 | 0/0 | match | match | match |
| 115239 | TruSeqV2    | 19:41381538 | 3'UTR    | C/C | 8.22E-14 | 255 | 99 | 21 | 63 | 0/0 | 0/0 | 0/0 | match | match | match |
| 132306 | Agilent38MB | 19:41381538 | 3'UTR    | C/C | 4.09E-14 | 30  | 47 | 33 | 93 | 0/0 | 0/0 | 0/0 | match | match | match |
| 163383 | TruSeqV2    | 19:41381538 | 3'UTR    | C/C | 2.22E-15 | 243 | 99 | 36 | 99 | 0/0 | 0/0 | 0/0 | match | match | match |
| 198564 | Agilent38MB | 19:41381538 | 3'UTR    | C/C | 1.55E-15 | 47  | 99 | 39 | 99 | 0/0 | 0/0 | 0/0 | match | match | match |
| 108971 | TruSeqV2    | 19:41381540 | 3'UTR    | C/C | 2.22E-16 | 216 | 99 | 21 | 63 | 0/0 | 0/0 | 0/0 | match | match | match |

|        |             |             |          |     |          |     |    |    |    |     |     |     |       |       |       |
|--------|-------------|-------------|----------|-----|----------|-----|----|----|----|-----|-----|-----|-------|-------|-------|
| 115239 | TruSeqV2    | 19:41381540 | 3'UTR    | C/C | 1.47E-13 | 254 | 99 | 22 | 66 | 0/0 | 0/0 | 0/0 | match | match | match |
| 132306 | Agilent38MB | 19:41381540 | 3'UTR    | C/C | 5.62E-14 | 33  | 51 | 32 | 93 | 0/0 | 0/0 | 0/0 | match | match | match |
| 163383 | TruSeqV2    | 19:41381540 | 3'UTR    | C/C | 1.42E-14 | 242 | 99 | 37 | 99 | 0/0 | 0/0 | 0/0 | match | match | match |
| 198564 | Agilent38MB | 19:41381540 | 3'UTR    | C/C | 1.55E-15 | 51  | 99 | 39 | 99 | 0/0 | 0/0 | 0/0 | match | match | match |
| 108971 | TruSeqV2    | 19:41381656 | missense | T/T | 6.66E-16 | 116 | 99 | 20 | 51 | 0/0 | 0/0 | 0/0 | match | match | match |
| 115239 | TruSeqV2    | 19:41381656 | missense | T/T | 1.40E-13 | 216 | 99 | 10 | 27 | 0/0 | 0/0 | 0/0 | match | match | match |
| 132306 | Agilent38MB | 19:41381656 | missense | T/T | 8.88E-16 | 31  | 64 | 31 | 84 | 0/0 | 0/0 | 0/0 | match | match | match |
| 163383 | TruSeqV2    | 19:41381656 | missense | T/T | 4.44E-16 | 155 | 99 | 26 | 69 | 0/0 | 0/0 | 0/0 | match | match | match |
| 198564 | Agilent38MB | 19:41381656 | missense | T/T | 3.77E-15 | 45  | 99 | 29 | 69 | 0/0 | 0/0 | 0/0 | match | match | match |
| 108971 | TruSeqV2    | 19:41383799 | missense | A/A | 5.57E-14 | 93  | 99 | 45 | 99 | 1/1 | 1/1 | 1/1 | match | match | match |
| 115239 | TruSeqV2    | 19:41383799 | missense | G/G | 4.39E-13 | 99  | 99 | 21 | 25 | 0/0 | 0/0 | 0/0 | match | match | match |
| 132306 | Agilent38MB | 19:41383799 | missense | G/A | 8.71E-10 | 159 | 99 | 32 | 99 | 0/1 | 0/1 | 0/1 | match | match | match |
| 163383 | TruSeqV2    | 19:41383799 | missense | G/A | 2.29E-11 | 80  | 99 | 31 | 99 | 0/1 | 0/1 | 0/1 | match | match | match |
| 198564 | Agilent38MB | 19:41383799 | missense | G/A | 4.18E-09 | 322 | 99 | 40 | 99 | 0/1 | 0/1 | 0/1 | match | match | match |
| 108971 | TruSeqV2    | 19:41383827 | synon    | T/T | 8.88E-16 | 102 | 99 | 40 | 96 | 0/0 | 0/0 | 0/0 | match | match | match |
| 115239 | TruSeqV2    | 19:41383827 | synon    | T/T | 6.66E-16 | 94  | 99 | 23 | 63 | 0/0 | 0/0 | 0/0 | match | match | match |
| 132306 | Agilent38MB | 19:41383827 | synon    | T/T | 2.22E-16 | 165 | 99 | 31 | 84 | 0/0 | 0/0 | 0/0 | match | match | match |
| 163383 | TruSeqV2    | 19:41383827 | synon    | T/T | 4.44E-16 | 82  | 99 | 35 | 93 | 0/0 | 0/0 | 0/0 | match | match | match |
| 198564 | Agilent38MB | 19:41383827 | synon    | T/T | 2.22E-14 | 350 | 99 | 43 | 99 | 0/0 | 0/0 | 0/0 | match | match | match |
| 108971 | TruSeqV2    | 19:41383828 | missense | G/G | 6.66E-16 | 102 | 99 | 38 | 87 | 0/0 | 0/0 | 0/0 | match | match | match |
| 115239 | TruSeqV2    | 19:41383828 | missense | G/G | 1.33E-15 | 95  | 99 | 22 | 63 | 0/0 | 0/0 | 0/0 | match | match | match |
| 132306 | Agilent38MB | 19:41383828 | missense | G/G | 4.44E-16 | 163 | 99 | 31 | 81 | 0/0 | 0/0 | 0/0 | match | match | match |
| 163383 | TruSeqV2    | 19:41383828 | missense | G/G | 1.11E-15 | 82  | 99 | 36 | 93 | 0/0 | 0/0 | 0/0 | match | match | match |
| 198564 | Agilent38MB | 19:41383828 | missense | G/G | 4.44E-16 | 348 | 99 | 43 | 99 | 0/0 | 0/0 | 0/0 | match | match | match |
| 108971 | TruSeqV2    | 19:41384675 | missense | C/C | 2.22E-16 | 162 | 99 | 30 | 90 | 1/1 | 1/1 | 1/1 | match | match | match |
| 132306 | Agilent38MB | 19:41384675 | missense | C/C | 4.44E-16 | 85  | 99 | 30 | 89 | 1/1 | 1/1 | 1/1 | match | match | match |
| 163383 | TruSeqV2    | 19:41384675 | missense | C/C | 2.22E-16 | 112 | 99 | 31 | 92 | 1/1 | 1/1 | 1/1 | match | match | match |
| 198564 | Agilent38MB | 19:41384675 | missense | C/C | 4.44E-16 | 140 | 99 | 53 | 99 | 1/1 | 1/1 | 1/1 | match | match | match |
| 108971 | TruSeqV2    | 19:41442352 | synon    | C/C | 2.22E-16 | 220 | 99 | 46 | 99 | 0/0 | 0/0 | 0/0 | match | match | match |
| 115239 | TruSeqV2    | 19:41442352 | synon    | C/C | 2.22E-16 | 146 | 99 | 25 | 66 | 0/0 | 0/0 | 0/0 | match | match | match |
| 132306 | Agilent38MB | 19:41442352 | synon    | C/C | 2.22E-16 | 46  | 99 | 33 | 75 | 0/0 | 0/0 | 0/0 | match | match | match |
| 163383 | TruSeqV2    | 19:41442352 | synon    | C/C | 2.22E-16 | 174 | 99 | 43 | 99 | 0/0 | 0/0 | 0/0 | match | match | match |
| 198564 | Agilent38MB | 19:41442352 | synon    | C/C | 2.22E-16 | 105 | 99 | 31 | 81 | 0/0 | 0/0 | 0/0 | match | match | match |
| 108971 | TruSeqV2    | 19:41497129 | promoter | T/T | 1.11E-15 | 27  | 33 | 46 | 99 | 0/0 | 0/0 | 0/0 | match | match | match |
| 115239 | TruSeqV2    | 19:41497129 | promoter | T/T | 8.88E-16 | 21  | 21 | 46 | 99 | 0/0 | 0/0 | 0/0 | match | match | match |
| 132306 | Agilent38MB | 19:41497129 | promoter | T/T | 4.44E-16 | 16  | 45 | 42 | 99 | 0/0 | 0/0 | 0/0 | match | match | match |
| 163383 | TruSeqV2    | 19:41497129 | promoter | T/T | 4.44E-16 | 28  | 81 | 32 | 87 | 0/0 | 0/0 | 0/0 | match | match | match |
| 198564 | Agilent38MB | 19:41497129 | promoter | T/T | 5.15E-14 | 19  | 54 | 45 | 99 | 0/0 | 0/0 | 0/0 | match | match | match |



|        |             |             |          |     |          |     |    |    |    |     |     |     |       |       |       |
|--------|-------------|-------------|----------|-----|----------|-----|----|----|----|-----|-----|-----|-------|-------|-------|
| 108971 | TruSeqV2    | 19:41497274 | missense | C/T | 8.44E-15 | 139 | 99 | 28 | 92 | 0/1 | 0/1 | 0/1 | match | match | match |
| 115239 | TruSeqV2    | 19:41497274 | missense | C/C | 2.22E-16 | 85  | 99 | 21 | 45 | 0/0 | 0/0 | 0/0 | match | match | match |
| 132306 | Agilent38MB | 19:41497274 | missense | C/C | 2.22E-16 | 77  | 99 | 25 | 69 | 0/0 | 0/0 | 0/0 | match | match | match |
| 163383 | TruSeqV2    | 19:41497274 | missense | C/C | 2.22E-16 | 98  | 99 | 29 | 69 | 0/0 | 0/0 | 0/0 | match | match | match |
| 198564 | Agilent38MB | 19:41497274 | missense | C/C | 4.44E-16 | 149 | 99 | 41 | 99 | 0/0 | 0/0 | 0/0 | match | match | match |
| 108971 | TruSeqV2    | 19:41497346 | missense | A/A | 1.28E-13 | 149 | 99 | 35 | 91 | 0/0 | 0/0 | 0/0 | match | match | match |
| 115239 | TruSeqV2    | 19:41497346 | missense | A/A | 4.93E-14 | 92  | 99 | 30 | 81 | 0/0 | 0/0 | 0/0 | match | match | match |
| 132306 | Agilent38MB | 19:41497346 | missense | A/A | 6.66E-16 | 60  | 99 | 38 | 99 | 0/0 | 0/0 | 0/0 | match | match | match |
| 163383 | TruSeqV2    | 19:41497346 | missense | A/A | 4.44E-16 | 112 | 99 | 31 | 87 | 0/0 | 0/0 | 0/0 | match | match | match |
| 198564 | Agilent38MB | 19:41497346 | missense | A/A | 2.93E-14 | 97  | 99 | 30 | 78 | 0/0 | 0/0 | 0/0 | match | match | match |
| 108971 | TruSeqV2    | 19:41509950 | synon    | C/G | 4.04E-14 | 163 | 99 | 26 | 99 | 0/1 | 0/1 | 0/1 | match | match | match |
| 115239 | TruSeqV2    | 19:41509950 | synon    | G/G | 4.44E-16 | 114 | 99 | 5  | 15 | 0/0 | 0/0 | 0/0 | match | match | match |
| 132306 | Agilent38MB | 19:41509950 | synon    | G/G | 4.44E-16 | 32  | 90 | 24 | 69 | 0/0 | 0/0 | 0/0 | match | match | match |
| 163383 | TruSeqV2    | 19:41509950 | synon    | G/G | 2.22E-16 | 93  | 99 | 31 | 81 | 0/0 | 0/0 | 0/0 | match | match | match |
| 198564 | Agilent38MB | 19:41509950 | synon    | G/G | 6.66E-16 | 68  | 99 | 38 | 99 | 0/0 | 0/0 | 0/0 | match | match | match |
| 108971 | TruSeqV2    | 19:41510030 | missense | G/G | 2.22E-16 | 174 | 99 | 33 | 87 | 0/0 | 0/0 | 0/0 | match | match | match |
| 115239 | TruSeqV2    | 19:41510030 | missense | G/G | 2.22E-16 | 118 | 99 | 18 | 48 | 0/0 | 0/0 | 0/0 | match | match | match |
| 132306 | Agilent38MB | 19:41510030 | missense | G/G | 4.44E-16 | 22  | 51 | 26 | 63 | 0/0 | 0/0 | 0/0 | match | match | match |
| 163383 | TruSeqV2    | 19:41510030 | missense | G/G | 2.22E-16 | 110 | 99 | 16 | 48 | 0/0 | 0/0 | 0/0 | match | match | match |
| 198564 | Agilent38MB | 19:41510030 | missense | G/G | 8.88E-16 | 22  | 45 | 23 | 54 | 0/0 | 0/0 | 0/0 | match | match | match |
| 108971 | TruSeqV2    | 19:41510282 | missense | A/A | 1.78E-15 | 223 | 99 | 33 | 84 | 0/0 | 0/0 | 0/0 | match | match | match |
| 115239 | TruSeqV2    | 19:41510282 | missense | A/A | 8.88E-16 | 133 | 99 | 29 | 53 | 0/0 | 0/0 | 0/0 | match | match | match |
| 132306 | Agilent38MB | 19:41510282 | missense | A/A | 4.44E-16 | 49  | 99 | 27 | 67 | 0/0 | 0/0 | 0/0 | match | match | match |
| 163383 | TruSeqV2    | 19:41510282 | missense | A/A | 4.44E-16 | 172 | 99 | 24 | 63 | 0/0 | 0/0 | 0/0 | match | match | match |
| 198564 | Agilent38MB | 19:41510282 | missense | A/A | 1.55E-15 | 110 | 99 | 30 | 63 | 0/0 | 0/0 | 0/0 | match | match | match |
| 108971 | TruSeqV2    | 19:41510286 | missense | G/G | 6.66E-16 | 228 | 99 | 36 | 87 | 0/0 | 0/0 | 0/0 | match | match | match |
| 115239 | TruSeqV2    | 19:41510286 | missense | G/G | 2.22E-16 | 132 | 99 | 32 | 72 | 0/0 | 0/0 | 0/0 | match | match | match |
| 132306 | Agilent38MB | 19:41510286 | missense | G/G | 2.22E-16 | 52  | 99 | 27 | 69 | 0/0 | 0/0 | 0/0 | match | match | match |
| 163383 | TruSeqV2    | 19:41510286 | missense | G/G | 2.22E-16 | 174 | 99 | 23 | 60 | 0/0 | 0/0 | 0/0 | match | match | match |
| 198564 | Agilent38MB | 19:41510286 | missense | G/G | 2.22E-16 | 106 | 99 | 25 | 63 | 0/0 | 0/0 | 0/0 | match | match | match |
| 198564 | Agilent38MB | 19:41511803 | intronic | C/C | 8.88E-16 | 2   | 6  | 43 | 99 | 0/0 | 0/0 | 0/0 | match | match | match |
| 108971 | TruSeqV2    | 19:41512792 | intronic | C/C | 1.76E-08 | 172 | 99 | 36 | 93 | 0/0 | 0/0 | 0/0 | match | match | match |
| 115239 | TruSeqV2    | 19:41512792 | intronic | C/T | 1.06E-11 | 110 | 99 | 26 | 99 | 0/1 | 0/1 | 0/1 | match | match | match |
| 132306 | Agilent38MB | 19:41512792 | intronic | C/C | 1.92E-13 | 26  | 72 | 17 | 42 | 0/0 | 0/0 | 0/0 | match | match | match |
| 163383 | TruSeqV2    | 19:41512792 | intronic | C/T | 1.07E-10 | 167 | 99 | 25 | 99 | 0/1 | 0/1 | 0/1 | match | match | match |
| 198564 | Agilent38MB | 19:41512792 | intronic | C/C | 6.91E-09 | 47  | 99 | 30 | 75 | 0/0 | 0/0 | 0/0 | match | match | match |
| 108971 | TruSeqV2    | 19:41512824 | missense | C/C | 8.88E-16 | 211 | 99 | 40 | 99 | 0/0 | 0/0 | 0/0 | match | match | match |
| 115239 | TruSeqV2    | 19:41512824 | missense | C/C | 4.44E-16 | 160 | 99 | 20 | 48 | 0/0 | 0/0 | 0/0 | match | match | match |

|        |             |             |          |     |          |     |    |    |    |     |     |     |       |       |       |
|--------|-------------|-------------|----------|-----|----------|-----|----|----|----|-----|-----|-----|-------|-------|-------|
| 132306 | Agilent38MB | 19:41512824 | missense | C/C | 2.22E-16 | 38  | 72 | 23 | 51 | 0/0 | 0/0 | 0/0 | match | match | match |
| 163383 | TruSeqV2    | 19:41512824 | missense | C/C | 2.22E-16 | 192 | 99 | 26 | 78 | 0/0 | 0/0 | 0/0 | match | match | match |
| 198564 | Agilent38MB | 19:41512824 | missense | C/C | 2.22E-16 | 72  | 99 | 31 | 84 | 0/0 | 0/0 | 0/0 | match | match | match |
| 108971 | TruSeqV2    | 19:41512828 | missense | C/C | 1.95E-10 | 216 | 99 | 40 | 99 | 0/0 | 0/0 | 0/0 | match | match | match |
| 115239 | TruSeqV2    | 19:41512828 | missense | C/C | 6.91E-12 | 168 | 99 | 17 | 48 | 0/0 | 0/0 | 0/0 | match | match | match |
| 132306 | Agilent38MB | 19:41512828 | missense | C/C | 1.11E-15 | 38  | 99 | 22 | 54 | 0/0 | 0/0 | 0/0 | match | match | match |
| 163383 | TruSeqV2    | 19:41512828 | missense | C/C | 4.44E-16 | 195 | 99 | 27 | 69 | 0/0 | 0/0 | 0/0 | match | match | match |
| 198564 | Agilent38MB | 19:41512828 | missense | C/C | 6.75E-09 | 81  | 99 | 32 | 93 | 0/0 | 0/0 | 0/0 | match | match | match |
| 108971 | TruSeqV2    | 19:41512841 | missense | G/G | 6.82E-08 | 236 | 99 | 39 | 79 | 0/0 | 0/0 | 0/0 | match | match | match |
| 115239 | TruSeqV2    | 19:41512841 | missense | G/G | 9.30E-12 | 196 | 99 | 16 | 42 | 0/0 | 0/0 | 0/0 | match | match | match |
| 132306 | Agilent38MB | 19:41512841 | missense | G/G | 1.57E-11 | 41  | 99 | 21 | 57 | 0/0 | 0/0 | 0/0 | match | match | match |
| 163383 | TruSeqV2    | 19:41512841 | missense | G/T | 7.53E-09 | 222 | 99 | 27 | 99 | 0/1 | 0/1 | 0/1 | match | match | match |
| 198564 | Agilent38MB | 19:41512841 | missense | G/G | 2.60E-08 | 93  | 99 | 39 | 99 | 0/0 | 0/0 | 0/0 | match | match | match |
| 108971 | TruSeqV2    | 19:41512918 | missense | T/T | 1.50E-12 | 235 | 99 | 41 | 99 | 0/0 | 0/0 | 0/0 | match | match | match |
| 115239 | TruSeqV2    | 19:41512918 | missense | T/T | 1.82E-14 | 196 | 99 | 37 | 99 | 0/0 | 0/0 | 0/0 | match | match | match |
| 132306 | Agilent38MB | 19:41512918 | missense | T/T | 5.77E-14 | 175 | 99 | 30 | 87 | 0/0 | 0/0 | 0/0 | match | match | match |
| 163383 | TruSeqV2    | 19:41512918 | missense | T/T | 6.66E-15 | 181 | 99 | 43 | 99 | 0/0 | 0/0 | 0/0 | match | match | match |
| 198564 | Agilent38MB | 19:41512918 | missense | T/T | 9.99E-15 | 354 | 99 | 36 | 87 | 0/0 | 0/0 | 0/0 | match | match | match |
| 108971 | TruSeqV2    | 19:41515255 | missense | C/C | 2.35E-14 | 121 | 99 | 22 | 57 | 0/0 | 0/0 | 0/0 | match | match | match |
| 115239 | TruSeqV2    | 19:41515255 | missense | C/C | 5.33E-15 | 80  | 99 | 22 | 57 | 0/0 | 0/0 | 0/0 | match | match | match |
| 132306 | Agilent38MB | 19:41515255 | missense | C/C | 1.55E-15 | 103 | 99 | 31 | 84 | 0/0 | 0/0 | 0/0 | match | match | match |
| 163383 | TruSeqV2    | 19:41515255 | missense | C/C | 1.78E-15 | 74  | 99 | 24 | 63 | 0/0 | 0/0 | 0/0 | match | match | match |
| 198564 | Agilent38MB | 19:41515255 | missense | C/C | 2.51E-14 | 144 | 99 | 30 | 84 | 0/0 | 0/0 | 0/0 | match | match | match |
| 108971 | TruSeqV2    | 19:41515263 | missense | A/A | 1.33E-15 | 111 | 99 | 24 | 63 | 0/0 | 0/0 | 0/0 | match | match | match |
| 115239 | TruSeqV2    | 19:41515263 | missense | A/A | 6.22E-15 | 82  | 99 | 22 | 57 | 0/0 | 0/0 | 0/0 | match | match | match |
| 132306 | Agilent38MB | 19:41515263 | missense | A/A | 1.11E-15 | 98  | 99 | 31 | 93 | 0/0 | 0/0 | 0/0 | match | match | match |
| 163383 | TruSeqV2    | 19:41515263 | missense | A/G | 2.22E-16 | 62  | 99 | 22 | 99 | 0/1 | 0/1 | 0/1 | match | match | match |
| 198564 | Agilent38MB | 19:41515263 | missense | A/A | 1.18E-14 | 134 | 99 | 29 | 75 | 0/0 | 0/0 | 0/0 | match | match | match |
| 132306 | Agilent38MB | 19:41515483 | intronic | G/G | 1.05E-11 | 2   | 6  | 24 | 48 | 0/0 | 0/0 | 0/0 | match | match | match |
| 163383 | TruSeqV2    | 19:41515483 | intronic | A/A | 3.99E-12 | 4   | 12 | 22 | 66 | 1/1 | 1/1 | 1/1 | match | match | match |
| 108971 | TruSeqV2    | 19:41518221 | missense | T/T | 6.66E-16 | 88  | 99 | 53 | 99 | 0/0 | 0/0 | 0/0 | match | match | match |
| 115239 | TruSeqV2    | 19:41518221 | missense | T/T | 6.66E-16 | 62  | 99 | 44 | 99 | 0/0 | 0/0 | 0/0 | match | match | match |
| 132306 | Agilent38MB | 19:41518221 | missense | T/T | 1.78E-15 | 106 | 99 | 41 | 99 | 0/0 | 0/0 | 0/0 | match | match | match |
| 163383 | TruSeqV2    | 19:41518221 | missense | T/T | 2.22E-16 | 64  | 99 | 36 | 99 | 0/0 | 0/0 | 0/0 | match | match | match |
| 198564 | Agilent38MB | 19:41518221 | missense | T/T | 4.44E-16 | 153 | 99 | 55 | 99 | 0/0 | 0/0 | 0/0 | match | match | match |
| 108971 | TruSeqV2    | 19:41518244 | missense | C/C | 2.22E-16 | 95  | 99 | 49 | 99 | 0/0 | 0/0 | 0/0 | match | match | match |
| 115239 | TruSeqV2    | 19:41518244 | missense | C/C | 4.44E-16 | 76  | 99 | 39 | 99 | 0/0 | 0/0 | 0/0 | match | match | match |
| 132306 | Agilent38MB | 19:41518244 | missense | C/C | 2.22E-16 | 120 | 99 | 42 | 99 | 0/0 | 0/0 | 0/0 | match | match | match |

|        |             |             |          |     |          |     |    |    |    |     |     |     |       |       |       |
|--------|-------------|-------------|----------|-----|----------|-----|----|----|----|-----|-----|-----|-------|-------|-------|
| 163383 | TruSeqV2    | 19:41518244 | missense | C/C | 4.44E-16 | 78  | 99 | 40 | 99 | 0/0 | 0/0 | 0/0 | match | match | match |
| 198564 | Agilent38MB | 19:41518244 | missense | C/C | 2.22E-16 | 180 | 99 | 46 | 99 | 0/0 | 0/0 | 0/0 | match | match | match |
| 108971 | TruSeqV2    | 19:41518370 | stop     | C/C | 6.66E-16 | 116 | 99 | 50 | 99 | 0/0 | 0/0 | 0/0 | match | match | match |
| 115239 | TruSeqV2    | 19:41518370 | stop     | C/C | 8.88E-16 | 77  | 99 | 38 | 99 | 0/0 | 0/0 | 0/0 | match | match | match |
| 132306 | Agilent38MB | 19:41518370 | stop     | C/C | 1.11E-15 | 141 | 99 | 23 | 57 | 0/0 | 0/0 | 0/0 | match | match | match |
| 163383 | TruSeqV2    | 19:41518370 | stop     | C/C | 2.00E-15 | 81  | 99 | 31 | 87 | 0/0 | 0/0 | 0/0 | match | match | match |
| 198564 | Agilent38MB | 19:41518370 | stop     | C/C | 6.66E-16 | 240 | 99 | 44 | 99 | 0/0 | 0/0 | 0/0 | match | match | match |
| 108971 | TruSeqV2    | 19:41518598 | missense | T/T | 2.22E-16 | 163 | 99 | 46 | 99 | 0/0 | 0/0 | 0/0 | match | match | match |
| 115239 | TruSeqV2    | 19:41518598 | missense | T/T | 2.22E-16 | 99  | 99 | 29 | 63 | 0/0 | 0/0 | 0/0 | match | match | match |
| 132306 | Agilent38MB | 19:41518598 | missense | T/T | 2.22E-16 | 16  | 48 | 41 | 99 | 0/0 | 0/0 | 0/0 | match | match | match |
| 163383 | TruSeqV2    | 19:41518598 | missense | T/T | 2.22E-16 | 129 | 99 | 42 | 91 | 0/0 | 0/0 | 0/0 | match | match | match |
| 198564 | Agilent38MB | 19:41518598 | missense | T/T | 1.11E-15 | 11  | 24 | 43 | 99 | 0/0 | 0/0 | 0/0 | match | match | match |
| 108971 | TruSeqV2    | 19:41518708 | missense | C/C | 8.88E-16 | 188 | 99 | 33 | 84 | 0/0 | 0/0 | 0/0 | match | match | match |
| 115239 | TruSeqV2    | 19:41518708 | missense | C/C | 2.00E-15 | 123 | 99 | 32 | 81 | 0/0 | 0/0 | 0/0 | match | match | match |
| 132306 | Agilent38MB | 19:41518708 | missense | C/C | 3.11E-15 | 88  | 99 | 33 | 84 | 0/0 | 0/0 | 0/0 | match | match | match |
| 163383 | TruSeqV2    | 19:41518708 | missense | C/C | 8.88E-16 | 135 | 99 | 35 | 90 | 0/0 | 0/0 | 0/0 | match | match | match |
| 198564 | Agilent38MB | 19:41518708 | missense | C/C | 8.88E-16 | 123 | 99 | 36 | 99 | 0/0 | 0/0 | 0/0 | match | match | match |
| 108971 | TruSeqV2    | 19:41518773 | intronic | C/C | 7.37E-14 | 100 | 99 | 42 | 99 | 0/0 | 0/0 | 0/0 | match | match | match |
| 115239 | TruSeqV2    | 19:41518773 | intronic | C/C | 1.91E-14 | 63  | 99 | 43 | 99 | 0/0 | 0/0 | 0/0 | match | match | match |
| 132306 | Agilent38MB | 19:41518773 | intronic | C/C | 1.07E-14 | 46  | 99 | 35 | 96 | 0/0 | 0/0 | 0/0 | match | match | match |
| 163383 | TruSeqV2    | 19:41518773 | intronic | C/T | 1.07E-14 | 78  | 99 | 43 | 99 | 0/1 | 0/1 | 0/1 | match | match | match |
| 198564 | Agilent38MB | 19:41518773 | intronic | C/C | 1.20E-14 | 68  | 99 | 43 | 99 | 0/0 | 0/0 | 0/0 | match | match | match |
| 108971 | TruSeqV2    | 19:41522715 | missense | C/C | 5.67E-09 | 78  | 99 | 37 | 84 | 0/0 | 0/0 | 0/0 | match | match | match |
| 115239 | TruSeqV2    | 19:41522715 | missense | C/T | 4.18E-05 | 54  | 99 | 19 | 99 | 0/1 | 0/1 | 0/1 | match | match | match |
| 132306 | Agilent38MB | 19:41522715 | missense | C/T | 1.08E-07 | 31  | 99 | 22 | 99 | 0/1 | 0/1 | 0/1 | match | match | match |
| 163383 | TruSeqV2    | 19:41522715 | missense | C/C | 1.90E-11 | 77  | 99 | 30 | 63 | 0/0 | 0/0 | 0/0 | match | match | match |
| 198564 | Agilent38MB | 19:41522715 | missense | C/T | 3.25E-06 | 53  | 99 | 34 | 99 | 0/1 | 0/1 | 0/1 | match | match | match |
| 115239 | TruSeqV2    | 19:41596742 | intronic | C/C | 6.66E-16 | 1   | 3  | 32 | 51 | 0/0 | 0/0 | 0/0 | match | match | match |
| 132306 | Agilent38MB | 19:41596742 | intronic | C/C | 2.22E-16 | 4   | 12 | 38 | 99 | 0/0 | 0/0 | 0/0 | match | match | match |
| 163383 | TruSeqV2    | 19:41596742 | intronic | C/C | 4.44E-16 | 2   | 6  | 36 | 96 | 0/0 | 0/0 | 0/0 | match | match | match |
| 198564 | Agilent38MB | 19:41596742 | intronic | C/C | 2.22E-16 | 1   | 3  | 37 | 99 | 0/0 | 0/0 | 0/0 | match | match | match |
| 108971 | TruSeqV2    | 19:41599665 | missense | C/C | 6.66E-16 | 102 | 99 | 46 | 99 | 0/0 | 0/0 | 0/0 | match | match | match |
| 115239 | TruSeqV2    | 19:41599665 | missense | C/C | 6.66E-16 | 79  | 99 | 30 | 72 | 0/0 | 0/0 | 0/0 | match | match | match |
| 132306 | Agilent38MB | 19:41599665 | missense | C/C | 4.44E-16 | 71  | 99 | 38 | 99 | 0/0 | 0/0 | 0/0 | match | match | match |
| 163383 | TruSeqV2    | 19:41599665 | missense | C/C | 4.44E-16 | 84  | 99 | 41 | 99 | 0/0 | 0/0 | 0/0 | match | match | match |
| 198564 | Agilent38MB | 19:41599665 | missense | C/C | 4.44E-16 | 103 | 99 | 41 | 99 | 0/0 | 0/0 | 0/0 | match | match | match |
| 108971 | TruSeqV2    | 19:41600808 | intronic | C/C | 8.88E-16 | 42  | 99 | 34 | 93 | 0/0 | 0/0 | 0/0 | match | match | match |
| 115239 | TruSeqV2    | 19:41600808 | intronic | C/C | 8.88E-16 | 22  | 63 | 27 | 72 | 0/0 | 0/0 | 0/0 | match | match | match |

|        |             |             |          |     |          |     |    |    |    |     |     |     |       |       |       |
|--------|-------------|-------------|----------|-----|----------|-----|----|----|----|-----|-----|-----|-------|-------|-------|
| 132306 | Agilent38MB | 19:41600808 | intronic | C/C | 4.44E-16 | 79  | 99 | 29 | 81 | 0/0 | 0/0 | 0/0 | match | match | match |
| 163383 | TruSeqV2    | 19:41600808 | intronic | C/C | 6.66E-16 | 25  | 63 | 22 | 54 | 0/0 | 0/0 | 0/0 | match | match | match |
| 198564 | Agilent38MB | 19:41600808 | intronic | C/C | 8.88E-15 | 178 | 99 | 32 | 84 | 0/0 | 0/0 | 0/0 | match | match | match |
| 108971 | TruSeqV2    | 19:41601609 | intronic | T/T | 6.66E-16 | 104 | 99 | 19 | 57 | 0/0 | 0/0 | 0/0 | match | match | match |
| 115239 | TruSeqV2    | 19:41601609 | intronic | T/T | 1.11E-15 | 83  | 99 | 7  | 0  | 0/0 | 0/0 | 0/0 | match | match | match |
| 132306 | Agilent38MB | 19:41601609 | intronic | T/T | 1.33E-15 | 48  | 99 | 25 | 63 | 0/0 | 0/0 | 0/0 | match | match | match |
| 163383 | TruSeqV2    | 19:41601609 | intronic | G/T | 1.40E-14 | 111 | 99 | 13 | 99 | 0/1 | 0/1 | 0/1 | match | match | match |
| 198564 | Agilent38MB | 19:41601609 | intronic | T/T | 9.77E-15 | 77  | 99 | 21 | 60 | 0/0 | 0/0 | 0/0 | match | match | match |
| 108971 | TruSeqV2    | 19:41622189 | synon    | A/G | 8.88E-16 | 125 | 99 | 43 | 99 | 0/1 | 0/1 | 0/1 | match | match | match |
| 115239 | TruSeqV2    | 19:41622189 | synon    | G/G | 6.66E-16 | 80  | 99 | 34 | 58 | 0/0 | 0/0 | 0/0 | match | match | match |
| 132306 | Agilent38MB | 19:41622189 | synon    | A/G | 2.44E-15 | 57  | 99 | 29 | 99 | 0/1 | 0/1 | 0/1 | match | match | match |
| 163383 | TruSeqV2    | 19:41622189 | synon    | A/G | 2.22E-15 | 80  | 99 | 32 | 99 | 0/1 | 0/1 | 0/1 | match | match | match |
| 198564 | Agilent38MB | 19:41622189 | synon    | A/G | 2.00E-15 | 111 | 99 | 35 | 99 | 0/1 | 0/1 | 0/1 | match | match | match |
| 108971 | TruSeqV2    | 19:41622205 | missense | T/T | 9.55E-15 | 117 | 99 | 45 | 99 | 0/0 | 0/0 | 0/0 | match | match | match |
| 115239 | TruSeqV2    | 19:41622205 | missense | T/T | 5.74E-09 | 74  | 99 | 31 | 78 | 0/0 | 0/0 | 0/0 | match | match | match |
| 132306 | Agilent38MB | 19:41622205 | missense | T/T | 1.28E-12 | 60  | 99 | 31 | 87 | 0/0 | 0/0 | 0/0 | match | match | match |
| 163383 | TruSeqV2    | 19:41622205 | missense | T/T | 9.94E-12 | 80  | 99 | 27 | 72 | 0/0 | 0/0 | 0/0 | match | match | match |
| 198564 | Agilent38MB | 19:41622205 | missense | T/T | 1.97E-06 | 139 | 99 | 30 | 87 | 0/0 | 0/0 | 0/0 | match | match | match |
| 108971 | TruSeqV2    | 19:41622481 | missense | G/G | 6.66E-16 | 210 | 99 | 25 | 66 | 0/0 | 0/0 | 0/0 | match | match | match |
| 115239 | TruSeqV2    | 19:41622481 | missense | G/G | 2.44E-15 | 143 | 99 | 26 | 75 | 0/0 | 0/0 | 0/0 | match | match | match |
| 132306 | Agilent38MB | 19:41622481 | missense | G/G | 8.88E-16 | 33  | 72 | 21 | 62 | 0/0 | 0/0 | 0/0 | match | match | match |
| 163383 | TruSeqV2    | 19:41622481 | missense | G/G | 4.44E-16 | 162 | 99 | 32 | 93 | 0/0 | 0/0 | 0/0 | match | match | match |
| 198564 | Agilent38MB | 19:41622481 | missense | G/G | 1.80E-14 | 68  | 99 | 36 | 93 | 0/0 | 0/0 | 0/0 | match | match | match |
| 108971 | TruSeqV2    | 19:41627401 | missense | G/G | 9.86E-10 | 249 | 99 | 21 | 54 | 0/0 | 0/0 | 0/0 | match | match | match |
| 115239 | TruSeqV2    | 19:41627401 | missense | G/G | 3.28E-05 | 127 | 99 | 24 | 54 | 0/0 | 0/0 | 0/0 | match | match | match |
| 132306 | Agilent38MB | 19:41627401 | missense | G/G | 7.49E-08 | 337 | 99 | 24 | 69 | 0/0 | 0/0 | 0/0 | match | match | match |
| 163383 | TruSeqV2    | 19:41627401 | missense | G/G | 1.70E-08 | 150 | 99 | 25 | 66 | 0/0 | 0/0 | 0/0 | match | match | match |
| 198564 | Agilent38MB | 19:41627401 | missense | G/G | 1.48E-08 | 734 | 99 | 20 | 54 | 0/0 | 0/0 | 0/0 | match | match | match |
| 108971 | TruSeqV2    | 19:41633980 | missense | C/C | 4.60E-14 | 125 | 99 | 30 | 78 | 0/0 | 0/0 | 0/0 | match | match | match |
| 115239 | TruSeqV2    | 19:41633980 | missense | C/C | 2.22E-15 | 97  | 99 | 14 | 36 | 0/0 | 0/0 | 0/0 | match | match | match |
| 132306 | Agilent38MB | 19:41633980 | missense | C/C | 2.51E-14 | 46  | 99 | 40 | 99 | 0/0 | 0/0 | 0/0 | match | match | match |
| 163383 | TruSeqV2    | 19:41633980 | missense | C/T | 7.86E-14 | 108 | 99 | 30 | 99 | 0/1 | 0/1 | 0/1 | match | match | match |
| 198564 | Agilent38MB | 19:41633980 | missense | C/C | 4.44E-16 | 87  | 99 | 40 | 96 | 0/0 | 0/0 | 0/0 | match | match | match |
| 108971 | TruSeqV2    | 19:41700469 | synon    | G/G | 2.44E-15 | 95  | 99 | 45 | 99 | 0/0 | 0/0 | 0/0 | match | match | match |
| 115239 | TruSeqV2    | 19:41700469 | synon    | G/G | 8.88E-16 | 55  | 99 | 20 | 57 | 0/0 | 0/0 | 0/0 | match | match | match |
| 132306 | Agilent38MB | 19:41700469 | synon    | G/G | 6.66E-16 | 77  | 99 | 27 | 75 | 0/0 | 0/0 | 0/0 | match | match | match |
| 163383 | TruSeqV2    | 19:41700469 | synon    | G/G | 4.44E-16 | 63  | 99 | 33 | 93 | 0/0 | 0/0 | 0/0 | match | match | match |
| 198564 | Agilent38MB | 19:41700469 | synon    | G/G | 4.44E-16 | 175 | 99 | 34 | 90 | 0/0 | 0/0 | 0/0 | match | match | match |

|        |             |             |          |     |          |     |    |    |    |     |     |     |       |       |       |
|--------|-------------|-------------|----------|-----|----------|-----|----|----|----|-----|-----|-----|-------|-------|-------|
| 108971 | TruSeqV2    | 19:41700493 | synon    | C/C | 8.88E-16 | 105 | 99 | 39 | 99 | 1/1 | 1/1 | 1/1 | match | match | match |
| 115239 | TruSeqV2    | 19:41700493 | synon    | C/C | 5.55E-15 | 62  | 99 | 22 | 66 | 1/1 | 1/1 | 1/1 | match | match | match |
| 132306 | Agilent38MB | 19:41700493 | synon    | C/C | 7.33E-15 | 55  | 99 | 29 | 87 | 1/1 | 1/1 | 1/1 | match | match | match |
| 163383 | TruSeqV2    | 19:41700493 | synon    | C/C | 6.66E-16 | 76  | 99 | 36 | 99 | 1/1 | 1/1 | 1/1 | match | match | match |
| 198564 | Agilent38MB | 19:41700493 | synon    | C/C | 1.33E-15 | 136 | 99 | 35 | 99 | 1/1 | 1/1 | 1/1 | match | match | match |
| 108971 | TruSeqV2    | 19:41703763 | synon    | G/G | 3.11E-15 | 122 | 99 | 36 | 87 | 0/0 | 0/0 | 0/0 | match | match | match |
| 115239 | TruSeqV2    | 19:41703763 | synon    | G/G | 6.66E-16 | 98  | 99 | 21 | 48 | 0/0 | 0/0 | 0/0 | match | match | match |
| 132306 | Agilent38MB | 19:41703763 | synon    | G/G | 5.33E-14 | 38  | 65 | 30 | 73 | 0/0 | 0/0 | 0/0 | match | match | match |
| 163383 | TruSeqV2    | 19:41703763 | synon    | G/G | 5.11E-15 | 105 | 99 | 29 | 63 | 0/0 | 0/0 | 0/0 | match | match | match |
| 198564 | Agilent38MB | 19:41703763 | synon    | G/G | 3.11E-14 | 49  | 99 | 38 | 78 | 0/0 | 0/0 | 0/0 | match | match | match |
| 108971 | TruSeqV2    | 19:41703793 | synon    | G/G | 1.11E-15 | 121 | 99 | 30 | 78 | 0/0 | 0/0 | 0/0 | match | match | match |
| 115239 | TruSeqV2    | 19:41703793 | synon    | G/G | 3.76E-12 | 94  | 99 | 20 | 42 | 0/0 | 0/0 | 0/0 | match | match | match |
| 132306 | Agilent38MB | 19:41703793 | synon    | G/G | 6.66E-16 | 39  | 96 | 31 | 84 | 0/0 | 0/0 | 0/0 | match | match | match |
| 163383 | TruSeqV2    | 19:41703793 | synon    | A/G | 5.00E-14 | 95  | 99 | 27 | 99 | 0/1 | 0/1 | 0/1 | match | match | match |
| 198564 | Agilent38MB | 19:41703793 | synon    | G/G | 2.77E-12 | 38  | 90 | 26 | 75 | 0/0 | 0/0 | 0/0 | match | match | match |
| 108971 | TruSeqV2    | 19:48374551 | 3'UTR    | G/G | 3.62E-14 | 37  | 99 | 25 | 74 | 1/1 | 1/1 | 1/1 | match | match | match |
| 115239 | TruSeqV2    | 19:48374551 | 3'UTR    | G/G | 1.06E-11 | 26  | 78 | 21 | 24 | 1/1 | 1/1 | 1/1 | match | match | match |
| 132306 | Agilent38MB | 19:48374551 | 3'UTR    | G/G | 3.44E-11 | 2   | 6  | 24 | 71 | 1/1 | 1/1 | 1/1 | match | match | match |
| 163383 | TruSeqV2    | 19:48374551 | 3'UTR    | G/G | 2.92E-13 | 49  | 99 | 25 | 74 | 1/1 | 1/1 | 1/1 | match | match | match |
| 108971 | TruSeqV2    | 19:48374789 | missense | C/C | 2.89E-15 | 1   | 3  | 42 | 99 | 0/0 | 0/0 | 0/0 | match | match | match |
| 115239 | TruSeqV2    | 19:48374789 | missense | C/C | 1.11E-14 | 4   | 9  | 43 | 99 | 0/0 | 0/0 | 0/0 | match | match | match |
| 132306 | Agilent38MB | 19:48374789 | missense | C/C | 4.88E-15 | 147 | 99 | 37 | 99 | 0/0 | 0/0 | 0/0 | match | match | match |
| 163383 | TruSeqV2    | 19:48374789 | missense | C/C | 5.11E-15 | 3   | 9  | 40 | 99 | 0/0 | 0/0 | 0/0 | match | match | match |
| 198564 | Agilent38MB | 19:48374789 | missense | C/C | 8.95E-13 | 290 | 99 | 41 | 99 | 0/0 | 0/0 | 0/0 | match | match | match |
| 108971 | TruSeqV2    | 19:48377980 | missense | T/T | 2.22E-16 | 133 | 99 | 26 | 60 | 0/0 | 0/0 | 0/0 | match | match | match |
| 115239 | TruSeqV2    | 19:48377980 | missense | T/T | 2.22E-16 | 96  | 99 | 34 | 81 | 0/0 | 0/0 | 0/0 | match | match | match |
| 132306 | Agilent38MB | 19:48377980 | missense | T/T | 2.22E-16 | 151 | 99 | 44 | 99 | 0/0 | 0/0 | 0/0 | match | match | match |
| 163383 | TruSeqV2    | 19:48377980 | missense | T/T | 4.44E-16 | 118 | 99 | 42 | 99 | 0/0 | 0/0 | 0/0 | match | match | match |
| 198564 | Agilent38MB | 19:48377980 | missense | T/T | 4.88E-15 | 268 | 99 | 36 | 87 | 0/0 | 0/0 | 0/0 | match | match | match |
| 108971 | TruSeqV2    | 19:48389425 | synon    | G/G | 2.22E-16 | 121 | 99 | 41 | 99 | 1/1 | 1/1 | 1/1 | match | match | match |
| 115239 | TruSeqV2    | 19:48389425 | synon    | G/G | 6.66E-16 | 78  | 99 | 40 | 99 | 1/1 | 1/1 | 1/1 | match | match | match |
| 132306 | Agilent38MB | 19:48389425 | synon    | G/G | 2.22E-16 | 315 | 99 | 43 | 99 | 1/1 | 1/1 | 1/1 | match | match | match |
| 163383 | TruSeqV2    | 19:48389425 | synon    | G/G | 6.66E-16 | 94  | 99 | 49 | 99 | 1/1 | 1/1 | 1/1 | match | match | match |
| 198564 | Agilent38MB | 19:48389425 | synon    | G/G | 4.44E-16 | 575 | 99 | 63 | 99 | 1/1 | 1/1 | 1/1 | match | match | match |
| 108971 | TruSeqV2    | 19:48389426 | missense | A/A | 2.22E-16 | 125 | 99 | 41 | 99 | 0/0 | 0/0 | 0/0 | match | match | match |
| 115239 | TruSeqV2    | 19:48389426 | missense | A/A | 2.22E-16 | 78  | 99 | 41 | 99 | 0/0 | 0/0 | 0/0 | match | match | match |
| 132306 | Agilent38MB | 19:48389426 | missense | A/A | 2.22E-16 | 325 | 99 | 44 | 99 | 0/0 | 0/0 | 0/0 | match | match | match |
| 163383 | TruSeqV2    | 19:48389426 | missense | A/A | 2.22E-16 | 96  | 99 | 49 | 99 | 0/0 | 0/0 | 0/0 | match | match | match |

|        |             |             |          |     |          |     |    |    |    |     |     |     |       |       |       |
|--------|-------------|-------------|----------|-----|----------|-----|----|----|----|-----|-----|-----|-------|-------|-------|
| 198564 | Agilent38MB | 19:48389426 | missense | A/A | 4.44E-16 | 584 | 99 | 66 | 99 | 0/0 | 0/0 | 0/0 | match | match | match |
| 108971 | TruSeqV2    | 19:48389509 | synon    | C/C | 2.22E-16 | 211 | 99 | 37 | 93 | 0/0 | 0/0 | 0/0 | match | match | match |
| 115239 | TruSeqV2    | 19:48389509 | synon    | C/C | 2.22E-16 | 135 | 99 | 41 | 99 | 0/0 | 0/0 | 0/0 | match | match | match |
| 132306 | Agilent38MB | 19:48389509 | synon    | C/C | 2.22E-16 | 218 | 99 | 39 | 99 | 0/0 | 0/0 | 0/0 | match | match | match |
| 163383 | TruSeqV2    | 19:48389509 | synon    | C/C | 2.22E-16 | 165 | 99 | 30 | 87 | 0/0 | 0/0 | 0/0 | match | match | match |
| 198564 | Agilent38MB | 19:48389509 | synon    | C/C | 2.22E-16 | 427 | 99 | 45 | 99 | 0/0 | 0/0 | 0/0 | match | match | match |
| 132306 | Agilent38MB | 19:49079246 | synon    | C/T | 2.00E-15 | 234 | 99 | 28 | 99 | 0/1 | 0/1 | 0/1 | match | match | match |
| 198564 | Agilent38MB | 19:49079246 | synon    | C/C | 1.11E-15 | 486 | 99 | 29 | 81 | 0/0 | 0/0 | 0/0 | match | match | match |
| 132306 | Agilent38MB | 19:49079278 | missense | T/T | 2.22E-16 | 257 | 99 | 29 | 81 | 0/0 | 0/0 | 0/0 | match | match | match |
| 198564 | Agilent38MB | 19:49079278 | missense | T/T | 3.11E-15 | 546 | 99 | 30 | 81 | 0/0 | 0/0 | 0/0 | match | match | match |
| 108971 | TruSeqV2    | 19:49090601 | synon    | C/C | 2.91E-14 | 148 | 99 | 30 | 84 | 0/0 | 0/0 | 0/0 | match | match | match |
| 115239 | TruSeqV2    | 19:49090601 | synon    | C/C | 8.46E-14 | 82  | 99 | 15 | 36 | 0/0 | 0/0 | 0/0 | match | match | match |
| 132306 | Agilent38MB | 19:49090601 | synon    | C/C | 4.88E-15 | 123 | 99 | 22 | 60 | 0/0 | 0/0 | 0/0 | match | match | match |
| 163383 | TruSeqV2    | 19:49090601 | synon    | C/C | 2.44E-15 | 106 | 99 | 29 | 69 | 0/0 | 0/0 | 0/0 | match | match | match |
| 198564 | Agilent38MB | 19:49090601 | synon    | C/C | 9.55E-15 | 256 | 99 | 25 | 57 | 0/0 | 0/0 | 0/0 | match | match | match |
| 108971 | TruSeqV2    | 19:49096028 | synon    | G/G | 8.88E-16 | 124 | 99 | 31 | 61 | 0/0 | 0/0 | 0/0 | match | match | match |
| 115239 | TruSeqV2    | 19:49096028 | synon    | G/G | 2.22E-16 | 96  | 99 | 27 | 72 | 0/0 | 0/0 | 0/0 | match | match | match |
| 132306 | Agilent38MB | 19:49096028 | synon    | G/G | 8.88E-16 | 34  | 93 | 34 | 93 | 0/0 | 0/0 | 0/0 | match | match | match |
| 163383 | TruSeqV2    | 19:49096028 | synon    | G/G | 4.44E-16 | 81  | 99 | 46 | 99 | 0/0 | 0/0 | 0/0 | match | match | match |
| 198564 | Agilent38MB | 19:49096028 | synon    | G/G | 2.22E-16 | 42  | 99 | 45 | 99 | 0/0 | 0/0 | 0/0 | match | match | match |
| 108971 | TruSeqV2    | 19:49096065 | synon    | C/C | 6.66E-16 | 87  | 99 | 29 | 63 | 0/0 | 0/0 | 0/0 | match | match | match |
| 115239 | TruSeqV2    | 19:49096065 | synon    | C/T | 1.13E-14 | 81  | 99 | 17 | 99 | 0/1 | 0/1 | 0/1 | match | match | match |
| 132306 | Agilent38MB | 19:49096065 | synon    | C/C | 3.11E-15 | 17  | 45 | 27 | 60 | 0/0 | 0/0 | 0/0 | match | match | match |
| 163383 | TruSeqV2    | 19:49096065 | synon    | C/T | 3.58E-13 | 64  | 99 | 39 | 99 | 0/1 | 0/1 | 0/1 | match | match | match |
| 198564 | Agilent38MB | 19:49096065 | synon    | C/T | 4.20E-14 | 15  | 99 | 42 | 99 | 0/1 | 0/1 | 0/1 | match | match | match |
| 108971 | TruSeqV2    | 19:49100068 | missense | G/G | 8.88E-16 | 109 | 99 | 26 | 69 | 0/0 | 0/0 | 0/0 | match | match | match |
| 115239 | TruSeqV2    | 19:49100068 | missense | G/G | 4.44E-16 | 88  | 99 | 10 | 30 | 0/0 | 0/0 | 0/0 | match | match | match |
| 132306 | Agilent38MB | 19:49100068 | missense | G/G | 1.11E-15 | 59  | 99 | 29 | 78 | 0/0 | 0/0 | 0/0 | match | match | match |
| 163383 | TruSeqV2    | 19:49100068 | missense | G/G | 6.66E-16 | 88  | 99 | 21 | 57 | 0/0 | 0/0 | 0/0 | match | match | match |
| 198564 | Agilent38MB | 19:49100068 | missense | G/G | 1.11E-15 | 102 | 99 | 30 | 72 | 0/0 | 0/0 | 0/0 | match | match | match |
| 108971 | TruSeqV2    | 19:49102399 | synon    | T/T | 3.22E-14 | 33  | 57 | 26 | 78 | 1/1 | 1/1 | 1/1 | match | match | match |
| 115239 | TruSeqV2    | 19:49102399 | synon    | C/T | 3.55E-15 | 17  | 99 | 15 | 99 | 0/1 | 0/1 | 0/1 | match | match | match |
| 132306 | Agilent38MB | 19:49102399 | synon    | C/T | 3.04E-14 | 11  | 99 | 25 | 99 | 0/1 | 0/1 | 0/1 | match | match | match |
| 163383 | TruSeqV2    | 19:49102399 | synon    | C/T | 6.00E-15 | 25  | 99 | 36 | 99 | 0/1 | 0/1 | 0/1 | match | match | match |
| 198564 | Agilent38MB | 19:49102399 | synon    | C/T | 2.22E-15 | 25  | 99 | 27 | 99 | 0/1 | 0/1 | 0/1 | match | match | match |
| 108971 | TruSeqV2    | 2:101008949 | 3'UTR    | C/C | 3.11E-15 | 230 | 99 | 35 | 96 | 0/0 | 0/0 | 0/0 | match | match | match |
| 115239 | TruSeqV2    | 2:101008949 | 3'UTR    | C/C | 1.15E-14 | 137 | 99 | 18 | 51 | 0/0 | 0/0 | 0/0 | match | match | match |
| 132306 | Agilent38MB | 2:101008949 | 3'UTR    | C/C | 3.35E-14 | 1   | 3  | 31 | 78 | 0/0 | 0/0 | 0/0 | match | match | match |

|        |             |             |          |     |          |     |    |    |    |     |     |     |       |       |       |
|--------|-------------|-------------|----------|-----|----------|-----|----|----|----|-----|-----|-----|-------|-------|-------|
| 163383 | TruSeqV2    | 2:101008949 | 3'UTR    | C/C | 1.78E-15 | 186 | 99 | 32 | 87 | 0/0 | 0/0 | 0/0 | match | match | match |
| 198564 | Agilent38MB | 2:101008949 | 3'UTR    | C/C | 6.44E-15 | 5   | 15 | 39 | 99 | 0/0 | 0/0 | 0/0 | match | match | match |
| 108971 | TruSeqV2    | 2:101009082 | 3'UTR    | C/C | 2.22E-16 | 183 | 99 | 46 | 99 | 0/0 | 0/0 | 0/0 | match | match | match |
| 115239 | TruSeqV2    | 2:101009082 | 3'UTR    | C/C | 6.66E-16 | 118 | 99 | 41 | 99 | 0/0 | 0/0 | 0/0 | match | match | match |
| 132306 | Agilent38MB | 2:101009082 | 3'UTR    | C/C | 8.88E-16 | 2   | 6  | 41 | 99 | 0/0 | 0/0 | 0/0 | match | match | match |
| 163383 | TruSeqV2    | 2:101009082 | 3'UTR    | C/C | 2.22E-16 | 170 | 99 | 36 | 96 | 0/0 | 0/0 | 0/0 | match | match | match |
| 198564 | Agilent38MB | 2:101009082 | 3'UTR    | C/C | 2.66E-15 | 6   | 18 | 37 | 99 | 0/0 | 0/0 | 0/0 | match | match | match |
| 115239 | TruSeqV2    | 2:101009326 | 3'UTR    | T/T | 1.13E-14 | 119 | 99 | 28 | 2  | 0/0 | 0/0 | 0/0 | match | match | match |
| 132306 | Agilent38MB | 2:101009326 | 3'UTR    | T/T | 1.44E-14 | 1   | 3  | 24 | 66 | 0/0 | 0/0 | 0/0 | match | match | match |
| 163383 | TruSeqV2    | 2:101009326 | 3'UTR    | T/T | 9.77E-15 | 151 | 99 | 39 | 99 | 0/0 | 0/0 | 0/0 | match | match | match |
| 198564 | Agilent38MB | 2:101009326 | 3'UTR    | T/T | 1.35E-14 | 2   | 6  | 44 | 99 | 0/0 | 0/0 | 0/0 | match | match | match |
| 108971 | TruSeqV2    | 2:101009376 | 3'UTR    | A/A | 8.88E-16 | 193 | 99 | 27 | 69 | 0/0 | 0/0 | 0/0 | match | match | match |
| 115239 | TruSeqV2    | 2:101009376 | 3'UTR    | A/A | 8.88E-16 | 138 | 99 | 32 | 78 | 0/0 | 0/0 | 0/0 | match | match | match |
| 132306 | Agilent38MB | 2:101009376 | 3'UTR    | A/A | 2.00E-15 | 1   | 3  | 32 | 87 | 0/0 | 0/0 | 0/0 | match | match | match |
| 163383 | TruSeqV2    | 2:101009376 | 3'UTR    | A/A | 1.11E-15 | 168 | 99 | 41 | 99 | 0/0 | 0/0 | 0/0 | match | match | match |
| 198564 | Agilent38MB | 2:101009376 | 3'UTR    | A/A | 6.00E-15 | 1   | 3  | 42 | 99 | 0/0 | 0/0 | 0/0 | match | match | match |
| 108971 | TruSeqV2    | 2:101009600 | 3'UTR    | G/A | 1.31E-14 | 206 | 99 | 25 | 99 | 0/1 | 0/1 | 0/1 | match | match | match |
| 115239 | TruSeqV2    | 2:101009600 | 3'UTR    | G/G | 6.67E-12 | 122 | 99 | 23 | 60 | 0/0 | 0/0 | 0/0 | match | match | match |
| 132306 | Agilent38MB | 2:101009600 | 3'UTR    | G/G | 3.39E-09 | 12  | 36 | 20 | 54 | 0/0 | 0/0 | 0/0 | match | match | match |
| 163383 | TruSeqV2    | 2:101009600 | 3'UTR    | G/G | 5.90E-11 | 153 | 99 | 31 | 87 | 0/0 | 0/0 | 0/0 | match | match | match |
| 198564 | Agilent38MB | 2:101009600 | 3'UTR    | G/G | 2.87E-10 | 18  | 45 | 34 | 84 | 0/0 | 0/0 | 0/0 | match | match | match |
| 108971 | TruSeqV2    | 2:101009668 | 3'UTR    | A/A | 4.44E-16 | 239 | 99 | 30 | 72 | 0/0 | 0/0 | 0/0 | match | match | match |
| 115239 | TruSeqV2    | 2:101009668 | 3'UTR    | A/A | 8.88E-16 | 150 | 99 | 25 | 63 | 0/0 | 0/0 | 0/0 | match | match | match |
| 132306 | Agilent38MB | 2:101009668 | 3'UTR    | A/A | 2.22E-16 | 47  | 99 | 23 | 60 | 0/0 | 0/0 | 0/0 | match | match | match |
| 163383 | TruSeqV2    | 2:101009668 | 3'UTR    | A/A | 4.44E-16 | 211 | 99 | 36 | 81 | 0/0 | 0/0 | 0/0 | match | match | match |
| 198564 | Agilent38MB | 2:101009668 | 3'UTR    | A/A | 6.66E-15 | 81  | 99 | 40 | 99 | 0/0 | 0/0 | 0/0 | match | match | match |
| 108971 | TruSeqV2    | 2:101009908 | synon    | G/G | 1.55E-15 | 153 | 99 | 24 | 60 | 0/0 | 0/0 | 0/0 | match | match | match |
| 115239 | TruSeqV2    | 2:101009908 | synon    | G/G | 4.44E-16 | 117 | 99 | 32 | 66 | 0/0 | 0/0 | 0/0 | match | match | match |
| 132306 | Agilent38MB | 2:101009908 | synon    | G/G | 1.11E-15 | 125 | 99 | 34 | 90 | 0/0 | 0/0 | 0/0 | match | match | match |
| 163383 | TruSeqV2    | 2:101009908 | synon    | G/G | 8.88E-16 | 127 | 99 | 37 | 90 | 0/0 | 0/0 | 0/0 | match | match | match |
| 198564 | Agilent38MB | 2:101009908 | synon    | G/G | 4.44E-16 | 272 | 99 | 40 | 99 | 0/0 | 0/0 | 0/0 | match | match | match |
| 108971 | TruSeqV2    | 2:101009983 | synon    | C/C | 4.44E-16 | 183 | 99 | 24 | 72 | 0/0 | 0/0 | 0/0 | match | match | match |
| 115239 | TruSeqV2    | 2:101009983 | synon    | C/C | 6.66E-16 | 115 | 99 | 18 | 42 | 0/0 | 0/0 | 0/0 | match | match | match |
| 132306 | Agilent38MB | 2:101009983 | synon    | C/C | 4.44E-16 | 185 | 99 | 23 | 63 | 0/0 | 0/0 | 0/0 | match | match | match |
| 163383 | TruSeqV2    | 2:101009983 | synon    | C/C | 4.44E-16 | 163 | 99 | 34 | 96 | 0/0 | 0/0 | 0/0 | match | match | match |
| 198564 | Agilent38MB | 2:101009983 | synon    | C/C | 4.44E-16 | 341 | 99 | 28 | 72 | 0/0 | 0/0 | 0/0 | match | match | match |
| 108971 | TruSeqV2    | 2:101010006 | missense | C/C | 8.88E-16 | 188 | 99 | 23 | 66 | 0/0 | 0/0 | 0/0 | match | match | match |
| 115239 | TruSeqV2    | 2:101010006 | missense | C/C | 4.44E-16 | 105 | 99 | 25 | 75 | 0/0 | 0/0 | 0/0 | match | match | match |

|        |             |             |          |     |          |     |    |    |    |     |     |     |       |       |       |
|--------|-------------|-------------|----------|-----|----------|-----|----|----|----|-----|-----|-----|-------|-------|-------|
| 132306 | Agilent38MB | 2:101010006 | missense | C/C | 4.22E-15 | 186 | 99 | 19 | 54 | 0/0 | 0/0 | 0/0 | match | match | match |
| 163383 | TruSeqV2    | 2:101010006 | missense | C/C | 1.11E-15 | 159 | 99 | 33 | 84 | 0/0 | 0/0 | 0/0 | match | match | match |
| 198564 | Agilent38MB | 2:101010006 | missense | C/C | 6.66E-16 | 345 | 99 | 30 | 73 | 0/0 | 0/0 | 0/0 | match | match | match |
| 108971 | TruSeqV2    | 2:101010043 | synon    | G/G | 1.55E-15 | 152 | 99 | 29 | 72 | 0/0 | 0/0 | 0/0 | match | match | match |
| 115239 | TruSeqV2    | 2:101010043 | synon    | G/G | 4.44E-16 | 94  | 99 | 32 | 90 | 0/0 | 0/0 | 0/0 | match | match | match |
| 132306 | Agilent38MB | 2:101010043 | synon    | G/G | 2.22E-16 | 166 | 99 | 20 | 54 | 0/0 | 0/0 | 0/0 | match | match | match |
| 163383 | TruSeqV2    | 2:101010043 | synon    | G/G | 6.66E-16 | 138 | 99 | 30 | 63 | 0/0 | 0/0 | 0/0 | match | match | match |
| 198564 | Agilent38MB | 2:101010043 | synon    | G/G | 8.88E-16 | 314 | 99 | 45 | 99 | 0/0 | 0/0 | 0/0 | match | match | match |
| 108971 | TruSeqV2    | 2:101010082 | synon    | G/C | 4.44E-16 | 138 | 99 | 34 | 99 | 0/1 | 0/1 | 0/1 | match | match | match |
| 115239 | TruSeqV2    | 2:101010082 | synon    | G/G | 1.55E-15 | 110 | 99 | 34 | 78 | 0/0 | 0/0 | 0/0 | match | match | match |
| 132306 | Agilent38MB | 2:101010082 | synon    | G/G | 5.24E-14 | 112 | 99 | 31 | 87 | 0/0 | 0/0 | 0/0 | match | match | match |
| 163383 | TruSeqV2    | 2:101010082 | synon    | G/G | 2.44E-15 | 140 | 99 | 32 | 90 | 0/0 | 0/0 | 0/0 | match | match | match |
| 198564 | Agilent38MB | 2:101010082 | synon    | G/G | 2.22E-15 | 232 | 99 | 40 | 99 | 0/0 | 0/0 | 0/0 | match | match | match |
| 108971 | TruSeqV2    | 2:101012060 | synon    | A/A | 2.22E-16 | 184 | 99 | 46 | 96 | 0/0 | 0/0 | 0/0 | match | match | match |
| 115239 | TruSeqV2    | 2:101012060 | synon    | A/A | 2.22E-16 | 112 | 99 | 42 | 99 | 0/0 | 0/0 | 0/0 | match | match | match |
| 132306 | Agilent38MB | 2:101012060 | synon    | A/A | 2.22E-16 | 98  | 99 | 37 | 93 | 0/0 | 0/0 | 0/0 | match | match | match |
| 163383 | TruSeqV2    | 2:101012060 | synon    | A/A | 2.22E-16 | 108 | 99 | 38 | 93 | 0/0 | 0/0 | 0/0 | match | match | match |
| 198564 | Agilent38MB | 2:101012060 | synon    | A/A | 2.22E-16 | 207 | 99 | 38 | 93 | 0/0 | 0/0 | 0/0 | match | match | match |
| 108971 | TruSeqV2    | 2:101019031 | synon    | G/G | 1.11E-15 | 150 | 99 | 39 | 99 | 0/0 | 0/0 | 0/0 | match | match | match |
| 115239 | TruSeqV2    | 2:101019031 | synon    | G/G | 4.44E-16 | 109 | 99 | 38 | 96 | 0/0 | 0/0 | 0/0 | match | match | match |
| 132306 | Agilent38MB | 2:101019031 | synon    | G/G | 2.22E-16 | 43  | 99 | 39 | 99 | 0/0 | 0/0 | 0/0 | match | match | match |
| 163383 | TruSeqV2    | 2:101019031 | synon    | G/G | 4.44E-16 | 116 | 99 | 27 | 66 | 0/0 | 0/0 | 0/0 | match | match | match |
| 198564 | Agilent38MB | 2:101019031 | synon    | G/G | 1.62E-14 | 87  | 99 | 39 | 99 | 0/0 | 0/0 | 0/0 | match | match | match |
| 108971 | TruSeqV2    | 2:101031561 | 5'UTR    | T/G | 8.44E-15 | 91  | 99 | 44 | 99 | 0/1 | 0/1 | 0/1 | match | match | match |
| 115239 | TruSeqV2    | 2:101031561 | 5'UTR    | G/G | 2.04E-13 | 74  | 99 | 34 | 90 | 0/0 | 0/0 | 0/0 | match | match | match |
| 163383 | TruSeqV2    | 2:101031561 | 5'UTR    | G/G | 2.89E-15 | 92  | 99 | 48 | 99 | 0/0 | 0/0 | 0/0 | match | match | match |
| 198564 | Agilent38MB | 2:101031561 | 5'UTR    | G/G | 3.11E-15 | 1   | 3  | 34 | 99 | 0/0 | 0/0 | 0/0 | match | match | match |
| 108971 | TruSeqV2    | 2:108910712 | missense | A/A | 8.88E-16 | 199 | 99 | 34 | 90 | 0/0 | 0/0 | 0/0 | match | match | match |
| 115239 | TruSeqV2    | 2:108910712 | missense | A/A | 2.22E-15 | 110 | 99 | 29 | 69 | 0/0 | 0/0 | 0/0 | match | match | match |
| 132306 | Agilent38MB | 2:108910712 | missense | A/A | 8.88E-16 | 406 | 99 | 36 | 93 | 0/0 | 0/0 | 0/0 | match | match | match |
| 163383 | TruSeqV2    | 2:108910712 | missense | A/A | 2.44E-15 | 170 | 99 | 18 | 54 | 0/0 | 0/0 | 0/0 | match | match | match |
| 198564 | Agilent38MB | 2:108910712 | missense | A/A | 2.22E-16 | 727 | 99 | 41 | 99 | 0/0 | 0/0 | 0/0 | match | match | match |
| 108971 | TruSeqV2    | 2:108910751 | missense | G/G | 6.66E-16 | 215 | 99 | 31 | 84 | 0/0 | 0/0 | 0/0 | match | match | match |
| 115239 | TruSeqV2    | 2:108910751 | missense | G/G | 2.22E-16 | 108 | 99 | 20 | 48 | 0/0 | 0/0 | 0/0 | match | match | match |
| 132306 | Agilent38MB | 2:108910751 | missense | G/G | 2.22E-16 | 371 | 99 | 26 | 75 | 0/0 | 0/0 | 0/0 | match | match | match |
| 163383 | TruSeqV2    | 2:108910751 | missense | A/G | 9.99E-15 | 173 | 99 | 21 | 99 | 0/1 | 0/1 | 0/1 | match | match | match |
| 198564 | Agilent38MB | 2:108910751 | missense | G/G | 8.88E-16 | 715 | 99 | 35 | 99 | 0/0 | 0/0 | 0/0 | match | match | match |
| 108971 | TruSeqV2    | 2:108917348 | missense | C/C | 5.55E-15 | 158 | 99 | 29 | 67 | 0/0 | 0/0 | 0/0 | match | match | match |



|        |             |             |          |     |             |     |    |    |    |     |     |     |       |       |       |
|--------|-------------|-------------|----------|-----|-------------|-----|----|----|----|-----|-----|-----|-------|-------|-------|
| 115239 | TruSeqV2    | 2:108917348 | missense | C/C | 2.22E-16    | 101 | 99 | 25 | 63 | 0/0 | 0/0 | 0/0 | match | match | match |
| 132306 | Agilent38MB | 2:108917348 | missense | C/C | 2.22E-16    | 227 | 99 | 38 | 99 | 0/0 | 0/0 | 0/0 | match | match | match |
| 163383 | TruSeqV2    | 2:108917348 | missense | C/C | 8.88E-16    | 125 | 99 | 38 | 99 | 0/0 | 0/0 | 0/0 | match | match | match |
| 198564 | Agilent38MB | 2:108917348 | missense | C/C | 1.11E-15    | 443 | 99 | 43 | 99 | 0/0 | 0/0 | 0/0 | match | match | match |
| 108971 | TruSeqV2    | 2:108922036 | missense | T/T | 2.22E-16    | 36  | 88 | 38 | 99 | 0/0 | 0/0 | 0/0 | match | match | match |
| 115239 | TruSeqV2    | 2:108922036 | missense | T/T | 4.44E-16    | 17  | 48 | 37 | 93 | 0/0 | 0/0 | 0/0 | match | match | match |
| 132306 | Agilent38MB | 2:108922036 | missense | G/T | 4.22E-15    | 114 | 99 | 28 | 99 | 0/1 | 0/1 | 0/1 | match | match | match |
| 163383 | TruSeqV2    | 2:108922036 | missense | T/T | 2.22E-16    | 35  | 78 | 45 | 99 | 0/0 | 0/0 | 0/0 | match | match | match |
| 198564 | Agilent38MB | 2:108922036 | missense | T/T | 6.57E-14    | 208 | 99 | 47 | 99 | 0/0 | 0/0 | 0/0 | match | match | match |
| 108971 | TruSeqV2    | 2:108925077 | 3'UTR    | A/A | 6.66E-16    | 70  | 99 | 52 | 99 | 0/0 | 0/0 | 0/0 | match | match | match |
| 115239 | TruSeqV2    | 2:108925077 | 3'UTR    | A/A | 4.44E-16    | 53  | 99 | 49 | 99 | 0/0 | 0/0 | 0/0 | match | match | match |
| 163383 | TruSeqV2    | 2:108925077 | 3'UTR    | A/A | 4.44E-16    | 72  | 99 | 28 | 75 | 0/0 | 0/0 | 0/0 | match | match | match |
| 198564 | Agilent38MB | 2:108925077 | 3'UTR    | A/A | 7.77E-15    | 2   | 6  | 37 | 99 | 0/0 | 0/0 | 0/0 | match | match | match |
| 108971 | TruSeqV2    | 2:108925184 | 3'UTR    | A/A | 4.44E-16    | 156 | 99 | 60 | 99 | 0/0 | 0/0 | 0/0 | match | match | match |
| 115239 | TruSeqV2    | 2:108925184 | 3'UTR    | A/A | 4.44E-16    | 100 | 99 | 49 | 99 | 0/0 | 0/0 | 0/0 | match | match | match |
| 163383 | TruSeqV2    | 2:108925184 | 3'UTR    | A/A | 4.44E-16    | 155 | 99 | 45 | 99 | 0/0 | 0/0 | 0/0 | match | match | match |
| 108971 | TruSeqV2    | 2:108925220 | 3'UTR    | A/A | 2.22E-16    | 146 | 99 | 70 | 99 | 0/0 | 0/0 | 0/0 | match | match | match |
| 115239 | TruSeqV2    | 2:108925220 | 3'UTR    | A/A | 8.88E-16    | 93  | 99 | 49 | 99 | 0/0 | 0/0 | 0/0 | match | match | match |
| 163383 | TruSeqV2    | 2:108925220 | 3'UTR    | A/A | 4.44E-16    | 138 | 99 | 58 | 99 | 0/0 | 0/0 | 0/0 | match | match | match |
| 108971 | TruSeqV2    | 2:108925749 | 3'UTR    | G/G | 2.22E-16    | 16  | 9  | 47 | 87 | 0/0 | 0/0 | 0/0 | match | match | match |
| 115239 | TruSeqV2    | 2:108925749 | 3'UTR    | G/G | 2.22E-16    | 9   | 12 | 28 | 63 | 0/0 | 0/0 | 0/0 | match | match | match |
| 132306 | Agilent38MB | 2:108925749 | 3'UTR    | G/G | 2.22E-16    | 3   | 9  | 44 | 99 | 0/0 | 0/0 | 0/0 | match | match | match |
| 163383 | TruSeqV2    | 2:108925749 | 3'UTR    | G/G | 2.22E-16    | 17  | 36 | 34 | 81 | 0/0 | 0/0 | 0/0 | match | match | match |
| 108971 | TruSeqV2    | 2:108925752 | 3'UTR    | G/G | 4.44E-16    | 15  | 9  | 46 | 72 | 0/0 | 0/0 | 0/0 | match | match | match |
| 115239 | TruSeqV2    | 2:108925752 | 3'UTR    | G/G | 2.22E-16    | 8   | 12 | 28 | 60 | 0/0 | 0/0 | 0/0 | match | match | match |
| 132306 | Agilent38MB | 2:108925752 | 3'UTR    | G/G | 2.22E-16    | 3   | 6  | 45 | 99 | 0/0 | 0/0 | 0/0 | match | match | match |
| 163383 | TruSeqV2    | 2:108925752 | 3'UTR    | G/G | 2.22E-16    | 17  | 36 | 35 | 75 | 0/0 | 0/0 | 0/0 | match | match | match |
| 108971 | TruSeqV2    | 2:108994305 | promoter | A/A | 1.11E-15    | 158 | 99 | 44 | 99 | 0/0 | 0/0 | 0/0 | match | match | match |
| 115239 | TruSeqV2    | 2:108994305 | promoter | A/A | 2.22E-16    | 138 | 99 | 29 | 75 | 0/0 | 0/0 | 0/0 | match | match | match |
| 163383 | TruSeqV2    | 2:108994305 | promoter | A/A | 8.88E-16    | 159 | 99 | 54 | 99 | 0/0 | 0/0 | 0/0 | match | match | match |
| 108971 | TruSeqV2    | 2:108994311 | promoter | C/C | 8.88E-16    | 172 | 99 | 43 | 99 | 0/0 | 0/0 | 0/0 | match | match | match |
| 115239 | TruSeqV2    | 2:108994311 | promoter | C/C | 5.82E-14    | 144 | 99 | 30 | 66 | 0/0 | 0/0 | 0/0 | match | match | match |
| 163383 | TruSeqV2    | 2:108994311 | promoter | C/C | 8.22E-15    | 164 | 99 | 54 | 99 | 0/0 | 0/0 | 0/0 | match | match | match |
| 115239 | TruSeqV2    | 2:108994732 | 5'UTR    | G/G | 0.000361562 | 73  | 99 | 28 | 0  | 0/0 | 0/0 | 0/0 | match | match | match |
| 108971 | TruSeqV2    | 2:108994808 | missense | C/C | 1.55E-15    | 101 | 99 | 51 | 99 | 0/0 | 0/0 | 0/0 | match | match | match |
| 115239 | TruSeqV2    | 2:108994808 | missense | G/G | 1.33E-15    | 69  | 99 | 33 | 99 | 1/1 | 1/1 | 1/1 | match | match | match |
| 132306 | Agilent38MB | 2:108994808 | missense | C/G | 1.11E-14    | 309 | 99 | 47 | 99 | 0/1 | 0/1 | 0/1 | match | match | match |
| 163383 | TruSeqV2    | 2:108994808 | missense | C/C | 2.44E-15    | 95  | 99 | 53 | 99 | 0/0 | 0/0 | 0/0 | match | match | match |

|        |             |             |          |     |          |     |    |    |    |     |     |     |       |       |       |
|--------|-------------|-------------|----------|-----|----------|-----|----|----|----|-----|-----|-----|-------|-------|-------|
| 198564 | Agilent38MB | 2:108994808 | missense | C/G | 2.22E-15 | 541 | 99 | 48 | 99 | 0/1 | 0/1 | 0/1 | match | match | match |
| 108971 | TruSeqV2    | 2:108999425 | intronic | A/A | 8.88E-16 | 16  | 45 | 38 | 99 | 0/0 | 0/0 | 0/0 | match | match | match |
| 115239 | TruSeqV2    | 2:108999425 | intronic | A/A | 6.66E-16 | 9   | 27 | 39 | 99 | 0/0 | 0/0 | 0/0 | match | match | match |
| 132306 | Agilent38MB | 2:108999425 | intronic | A/A | 6.66E-16 | 10  | 27 | 24 | 66 | 0/0 | 0/0 | 0/0 | match | match | match |
| 163383 | TruSeqV2    | 2:108999425 | intronic | A/A | 8.88E-16 | 15  | 42 | 31 | 93 | 0/0 | 0/0 | 0/0 | match | match | match |
| 198564 | Agilent38MB | 2:108999425 | intronic | A/A | 1.55E-15 | 3   | 9  | 34 | 93 | 0/0 | 0/0 | 0/0 | match | match | match |
| 108971 | TruSeqV2    | 2:138759723 | fs       | A/A | 2.22E-16 | 75  | 99 | 25 | 66 | 0/0 | 0/0 | 0/0 | match | match | match |
| 115239 | TruSeqV2    | 2:138759723 | fs       | A/A | 6.66E-16 | 75  | 99 | 25 | 66 | 0/0 | 0/0 | 0/0 | match | match | match |
| 132306 | Agilent38MB | 2:138759723 | fs       | A/A | 6.66E-16 | 75  | 99 | 25 | 66 | 0/0 | 0/0 | 0/0 | match | match | match |
| 163383 | TruSeqV2    | 2:138759723 | fs       | A/A | 2.22E-16 | 75  | 99 | 25 | 66 | 0/0 | 0/0 | 0/0 | match | match | match |
| 198564 | Agilent38MB | 2:138759723 | fs       | A/A | 1.11E-15 | 75  | 99 | 25 | 66 | 0/0 | 0/0 | 0/0 | match | match | match |
| 108971 | TruSeqV2    | 2:138771521 | missense | A/A | 4.44E-16 | 51  | 99 | 36 | 93 | 0/0 | 0/0 | 0/0 | match | match | match |
| 115239 | TruSeqV2    | 2:138771521 | missense | A/A | 4.44E-16 | 29  | 81 | 37 | 99 | 0/0 | 0/0 | 0/0 | match | match | match |
| 132306 | Agilent38MB | 2:138771521 | missense | A/A | 4.44E-16 | 221 | 99 | 36 | 99 | 0/0 | 0/0 | 0/0 | match | match | match |
| 163383 | TruSeqV2    | 2:138771521 | missense | A/A | 4.44E-16 | 60  | 99 | 41 | 99 | 0/0 | 0/0 | 0/0 | match | match | match |
| 198564 | Agilent38MB | 2:138771521 | missense | A/A | 2.44E-15 | 411 | 99 | 38 | 96 | 0/0 | 0/0 | 0/0 | match | match | match |
| 108971 | TruSeqV2    | 2:138771760 | 3'UTR    | A/A | 1.11E-15 | 111 | 99 | 49 | 99 | 0/0 | 0/0 | 0/0 | match | match | match |
| 115239 | TruSeqV2    | 2:138771760 | 3'UTR    | A/G | 2.00E-15 | 76  | 99 | 30 | 99 | 0/1 | 0/1 | 0/1 | match | match | match |
| 132306 | Agilent38MB | 2:138771760 | 3'UTR    | A/A | 1.55E-15 | 6   | 12 | 36 | 93 | 0/0 | 0/0 | 0/0 | match | match | match |
| 163383 | TruSeqV2    | 2:138771760 | 3'UTR    | A/G | 2.22E-15 | 106 | 99 | 32 | 99 | 0/1 | 0/1 | 0/1 | match | match | match |
| 108971 | TruSeqV2    | 2:138772335 | 3'UTR    | G/G | 8.88E-16 | 13  | 39 | 42 | 99 | 0/0 | 0/0 | 0/0 | match | match | match |
| 115239 | TruSeqV2    | 2:138772335 | 3'UTR    | G/G | 6.66E-16 | 5   | 15 | 51 | 99 | 0/0 | 0/0 | 0/0 | match | match | match |
| 163383 | TruSeqV2    | 2:138772335 | 3'UTR    | G/G | 6.66E-16 | 10  | 30 | 59 | 99 | 0/0 | 0/0 | 0/0 | match | match | match |
| 108971 | TruSeqV2    | 2:138772694 | 3'UTR    | C/C | 6.66E-16 | 56  | 99 | 41 | 99 | 0/0 | 0/0 | 0/0 | match | match | match |
| 115239 | TruSeqV2    | 2:138772694 | 3'UTR    | C/T | 7.39E-14 | 25  | 99 | 31 | 99 | 0/1 | 0/1 | 0/1 | match | match | match |
| 163383 | TruSeqV2    | 2:138772694 | 3'UTR    | C/T | 3.77E-15 | 38  | 99 | 48 | 99 | 0/1 | 0/1 | 0/1 | match | match | match |
| 108971 | TruSeqV2    | 2:138773229 | 3'UTR    | G/G | 8.88E-16 | 130 | 99 | 41 | 99 | 0/0 | 0/0 | 0/0 | match | match | match |
| 115239 | TruSeqV2    | 2:138773229 | 3'UTR    | A/G | 2.22E-15 | 61  | 99 | 54 | 99 | 0/1 | 0/1 | 0/1 | match | match | match |
| 163383 | TruSeqV2    | 2:138773229 | 3'UTR    | A/G | 2.44E-15 | 90  | 99 | 44 | 99 | 0/1 | 0/1 | 0/1 | match | match | match |
| 108971 | TruSeqV2    | 2:169779712 | 3'UTR    | T/C | 1.78E-15 | 137 | 99 | 43 | 99 | 0/1 | 0/1 | 0/1 | match | match | match |
| 115239 | TruSeqV2    | 2:169779712 | 3'UTR    | T/T | 2.00E-15 | 115 | 99 | 31 | 54 | 0/0 | 0/0 | 0/0 | match | match | match |
| 163383 | TruSeqV2    | 2:169779712 | 3'UTR    | T/T | 5.77E-15 | 128 | 99 | 40 | 96 | 0/0 | 0/0 | 0/0 | match | match | match |
| 108971 | TruSeqV2    | 2:169779764 | 3'UTR    | T/C | 2.22E-15 | 156 | 99 | 41 | 99 | 0/1 | 0/1 | 0/1 | match | match | match |
| 115239 | TruSeqV2    | 2:169779764 | 3'UTR    | C/C | 3.55E-15 | 102 | 99 | 31 | 84 | 0/0 | 0/0 | 0/0 | match | match | match |
| 163383 | TruSeqV2    | 2:169779764 | 3'UTR    | C/C | 7.22E-14 | 127 | 99 | 43 | 99 | 0/0 | 0/0 | 0/0 | match | match | match |
| 108971 | TruSeqV2    | 2:169779851 | 3'UTR    | A/A | 4.44E-16 | 158 | 99 | 34 | 90 | 0/0 | 0/0 | 0/0 | match | match | match |
| 115239 | TruSeqV2    | 2:169779851 | 3'UTR    | A/A | 6.66E-16 | 79  | 99 | 19 | 45 | 0/0 | 0/0 | 0/0 | match | match | match |
| 163383 | TruSeqV2    | 2:169779851 | 3'UTR    | A/A | 4.44E-16 | 142 | 99 | 30 | 75 | 0/0 | 0/0 | 0/0 | match | match | match |

|        |             |             |          |     |          |     |    |    |    |     |     |     |       |       |       |
|--------|-------------|-------------|----------|-----|----------|-----|----|----|----|-----|-----|-----|-------|-------|-------|
| 198564 | Agilent38MB | 2:169779851 | 3'UTR    | A/A | 2.22E-16 | 2   | 5  | 32 | 93 | 0/0 | 0/0 | 0/0 | match | match | match |
| 108971 | TruSeqV2    | 2:169779896 | 3'UTR    | T/C | 3.60E-14 | 101 | 99 | 36 | 99 | 0/1 | 0/1 | 0/1 | match | match | match |
| 115239 | TruSeqV2    | 2:169779896 | 3'UTR    | T/C | 7.79E-14 | 58  | 99 | 40 | 99 | 0/1 | 0/1 | 0/1 | match | match | match |
| 163383 | TruSeqV2    | 2:169779896 | 3'UTR    | T/T | 1.15E-14 | 84  | 99 | 35 | 87 | 0/0 | 0/0 | 0/0 | match | match | match |
| 108971 | TruSeqV2    | 2:169780295 | missense | C/C | 4.44E-16 | 15  | 39 | 39 | 99 | 0/0 | 0/0 | 0/0 | match | match | match |
| 115239 | TruSeqV2    | 2:169780295 | missense | C/C | 2.22E-16 | 10  | 24 | 34 | 96 | 0/0 | 0/0 | 0/0 | match | match | match |
| 163383 | TruSeqV2    | 2:169780295 | missense | C/C | 2.22E-16 | 9   | 18 | 24 | 60 | 0/0 | 0/0 | 0/0 | match | match | match |
| 198564 | Agilent38MB | 2:169780295 | missense | C/C | 2.22E-16 | 5   | 9  | 35 | 99 | 0/0 | 0/0 | 0/0 | match | match | match |
| 108971 | TruSeqV2    | 2:169783728 | missense | C/C | 2.22E-16 | 108 | 99 | 30 | 76 | 0/0 | 0/0 | 0/0 | match | match | match |
| 115239 | TruSeqV2    | 2:169783728 | missense | C/C | 2.22E-16 | 90  | 99 | 32 | 90 | 0/0 | 0/0 | 0/0 | match | match | match |
| 163383 | TruSeqV2    | 2:169783728 | missense | C/C | 4.44E-16 | 113 | 99 | 33 | 62 | 0/0 | 0/0 | 0/0 | match | match | match |
| 198564 | Agilent38MB | 2:169783728 | missense | C/C | 7.11E-15 | 2   | 6  | 39 | 99 | 0/0 | 0/0 | 0/0 | match | match | match |
| 108971 | TruSeqV2    | 2:169783827 | missense | G/G | 6.88E-15 | 155 | 99 | 61 | 99 | 0/0 | 0/0 | 0/0 | match | match | match |
| 115239 | TruSeqV2    | 2:169783827 | missense | G/G | 7.99E-15 | 96  | 99 | 45 | 99 | 0/0 | 0/0 | 0/0 | match | match | match |
| 163383 | TruSeqV2    | 2:169783827 | missense | G/G | 1.11E-15 | 143 | 99 | 46 | 99 | 0/0 | 0/0 | 0/0 | match | match | match |
| 198564 | Agilent38MB | 2:169783827 | missense | G/G | 3.15E-14 | 1   | 3  | 47 | 99 | 0/0 | 0/0 | 0/0 | match | match | match |
| 108971 | TruSeqV2    | 2:169787318 | stop     | G/G | 2.22E-16 | 125 | 99 | 39 | 99 | 0/0 | 0/0 | 0/0 | match | match | match |
| 115239 | TruSeqV2    | 2:169787318 | stop     | G/G | 4.44E-16 | 102 | 99 | 31 | 84 | 0/0 | 0/0 | 0/0 | match | match | match |
| 163383 | TruSeqV2    | 2:169787318 | stop     | G/G | 2.22E-16 | 128 | 99 | 39 | 99 | 0/0 | 0/0 | 0/0 | match | match | match |
| 108971 | TruSeqV2    | 2:169788931 | stop     | G/G | 2.22E-16 | 186 | 99 | 49 | 99 | 0/0 | 0/0 | 0/0 | match | match | match |
| 115239 | TruSeqV2    | 2:169788931 | stop     | G/G | 2.22E-16 | 136 | 99 | 40 | 99 | 0/0 | 0/0 | 0/0 | match | match | match |
| 163383 | TruSeqV2    | 2:169788931 | stop     | G/G | 2.22E-16 | 138 | 99 | 49 | 99 | 0/0 | 0/0 | 0/0 | match | match | match |
| 108971 | TruSeqV2    | 2:169789016 | synon    | T/C | 4.07E-11 | 147 | 99 | 32 | 99 | 0/1 | 0/1 | 0/1 | match | match | match |
| 115239 | TruSeqV2    | 2:169789016 | synon    | T/T | 1.55E-15 | 101 | 99 | 31 | 84 | 0/0 | 0/0 | 0/0 | match | match | match |
| 163383 | TruSeqV2    | 2:169789016 | synon    | T/T | 2.22E-15 | 104 | 99 | 41 | 99 | 0/0 | 0/0 | 0/0 | match | match | match |
| 108971 | TruSeqV2    | 2:169791806 | missense | C/C | 2.22E-16 | 222 | 99 | 55 | 99 | 0/0 | 0/0 | 0/0 | match | match | match |
| 115239 | TruSeqV2    | 2:169791806 | missense | C/C | 2.22E-16 | 131 | 99 | 46 | 99 | 0/0 | 0/0 | 0/0 | match | match | match |
| 132306 | Agilent38MB | 2:169791806 | missense | C/C | 2.22E-16 | 1   | 3  | 37 | 93 | 0/0 | 0/0 | 0/0 | match | match | match |
| 163383 | TruSeqV2    | 2:169791806 | missense | C/C | 2.22E-16 | 178 | 99 | 44 | 99 | 0/0 | 0/0 | 0/0 | match | match | match |
| 108971 | TruSeqV2    | 2:169801403 | synon    | T/T | 2.24E-13 | 112 | 99 | 47 | 99 | 0/0 | 0/0 | 0/0 | match | match | match |
| 115239 | TruSeqV2    | 2:169801403 | synon    | T/T | 2.22E-16 | 68  | 99 | 37 | 67 | 0/0 | 0/0 | 0/0 | match | match | match |
| 163383 | TruSeqV2    | 2:169801403 | synon    | T/T | 4.44E-16 | 119 | 99 | 53 | 99 | 0/0 | 0/0 | 0/0 | match | match | match |
| 108971 | TruSeqV2    | 2:169826641 | stop     | G/G | 4.44E-16 | 170 | 99 | 32 | 90 | 0/0 | 0/0 | 0/0 | match | match | match |
| 115239 | TruSeqV2    | 2:169826641 | stop     | G/G | 8.88E-16 | 108 | 99 | 40 | 99 | 0/0 | 0/0 | 0/0 | match | match | match |
| 163383 | TruSeqV2    | 2:169826641 | stop     | G/G | 2.22E-16 | 109 | 99 | 27 | 78 | 0/0 | 0/0 | 0/0 | match | match | match |
| 198564 | Agilent38MB | 2:169826641 | stop     | G/G | 2.22E-16 | 1   | 3  | 36 | 99 | 0/0 | 0/0 | 0/0 | match | match | match |
| 108971 | TruSeqV2    | 2:169828550 | missense | T/T | 6.66E-16 | 167 | 99 | 41 | 99 | 0/0 | 0/0 | 0/0 | match | match | match |
| 115239 | TruSeqV2    | 2:169828550 | missense | T/T | 4.44E-16 | 119 | 99 | 49 | 99 | 0/0 | 0/0 | 0/0 | match | match | match |

|        |             |             |            |     |          |     |    |    |    |     |     |     |       |       |       |
|--------|-------------|-------------|------------|-----|----------|-----|----|----|----|-----|-----|-----|-------|-------|-------|
| 132306 | Agilent38MB | 2:169828550 | missense   | T/T | 2.22E-16 | 3   | 9  | 33 | 90 | 0/0 | 0/0 | 0/0 | match | match | match |
| 163383 | TruSeqV2    | 2:169828550 | missense   | T/T | 2.22E-16 | 131 | 99 | 35 | 99 | 0/0 | 0/0 | 0/0 | match | match | match |
| 108971 | TruSeqV2    | 2:169830328 | missense   | G/A | 2.20E-13 | 173 | 99 | 35 | 99 | 0/1 | 0/1 | 0/1 | match | match | match |
| 115239 | TruSeqV2    | 2:169830328 | missense   | A/A | 3.29E-14 | 115 | 99 | 40 | 0  | 0/0 | 0/0 | 0/0 | match | match | match |
| 163383 | TruSeqV2    | 2:169830328 | missense   | G/A | 4.84E-13 | 164 | 99 | 32 | 99 | 0/1 | 0/1 | 0/1 | match | match | match |
| 108971 | TruSeqV2    | 2:169842746 | synon      | T/T | 6.66E-16 | 125 | 99 | 34 | 90 | 0/0 | 0/0 | 0/0 | match | match | match |
| 115239 | TruSeqV2    | 2:169842746 | synon      | T/T | 6.66E-16 | 91  | 99 | 35 | 96 | 0/0 | 0/0 | 0/0 | match | match | match |
| 163383 | TruSeqV2    | 2:169842746 | synon      | T/T | 4.44E-16 | 128 | 99 | 33 | 96 | 0/0 | 0/0 | 0/0 | match | match | match |
| 108971 | TruSeqV2    | 2:169847323 | missense   | C/C | 2.22E-16 | 99  | 99 | 46 | 99 | 0/0 | 0/0 | 0/0 | match | match | match |
| 115239 | TruSeqV2    | 2:169847323 | missense   | C/C | 1.11E-15 | 65  | 99 | 32 | 73 | 0/0 | 0/0 | 0/0 | match | match | match |
| 163383 | TruSeqV2    | 2:169847323 | missense   | C/C | 4.44E-16 | 109 | 99 | 33 | 81 | 0/0 | 0/0 | 0/0 | match | match | match |
| 108971 | TruSeqV2    | 2:169847412 | synon      | A/A | 4.44E-16 | 151 | 99 | 60 | 99 | 0/0 | 0/0 | 0/0 | match | match | match |
| 115239 | TruSeqV2    | 2:169847412 | synon      | A/A | 2.22E-16 | 101 | 99 | 41 | 99 | 0/0 | 0/0 | 0/0 | match | match | match |
| 163383 | TruSeqV2    | 2:169847412 | synon      | A/A | 2.22E-16 | 132 | 99 | 33 | 84 | 0/0 | 0/0 | 0/0 | match | match | match |
| 108971 | TruSeqV2    | 2:169850291 | missense   | C/C | 1.60E-14 | 143 | 99 | 47 | 99 | 0/0 | 0/0 | 0/0 | match | match | match |
| 115239 | TruSeqV2    | 2:169850291 | missense   | C/C | 1.78E-15 | 90  | 99 | 34 | 99 | 0/0 | 0/0 | 0/0 | match | match | match |
| 163383 | TruSeqV2    | 2:169850291 | missense   | C/C | 1.11E-15 | 127 | 99 | 41 | 99 | 0/0 | 0/0 | 0/0 | match | match | match |
| 108971 | TruSeqV2    | 2:169869901 | synon      | A/A | 2.22E-16 | 109 | 99 | 41 | 99 | 0/0 | 0/0 | 0/0 | match | match | match |
| 115239 | TruSeqV2    | 2:169869901 | synon      | A/A | 4.44E-16 | 65  | 99 | 39 | 99 | 0/0 | 0/0 | 0/0 | match | match | match |
| 163383 | TruSeqV2    | 2:169869901 | synon      | A/A | 4.44E-16 | 106 | 99 | 42 | 99 | 0/0 | 0/0 | 0/0 | match | match | match |
| 108971 | TruSeqV2    | 2:169870855 | synon      | A/A | 6.66E-16 | 96  | 99 | 48 | 99 | 0/0 | 0/0 | 0/0 | match | match | match |
| 115239 | TruSeqV2    | 2:169870855 | synon      | A/A | 8.88E-16 | 70  | 99 | 43 | 99 | 0/0 | 0/0 | 0/0 | match | match | match |
| 163383 | TruSeqV2    | 2:169870855 | synon      | A/A | 6.22E-15 | 97  | 99 | 53 | 99 | 0/0 | 0/0 | 0/0 | match | match | match |
| 108971 | TruSeqV2    | 2:169870882 | intronic   | A/A | 6.66E-16 | 80  | 99 | 49 | 99 | 0/0 | 0/0 | 0/0 | match | match | match |
| 115239 | TruSeqV2    | 2:169870882 | intronic   | A/A | 6.66E-16 | 59  | 99 | 47 | 99 | 0/0 | 0/0 | 0/0 | match | match | match |
| 163383 | TruSeqV2    | 2:169870882 | intronic   | A/A | 2.89E-15 | 78  | 99 | 51 | 99 | 0/0 | 0/0 | 0/0 | match | match | match |
| 198564 | Agilent38MB | 2:169875539 | intronic   | G/G | 5.13E-13 | 2   | 6  | 45 | 99 | 0/0 | 0/0 | 0/0 | match | match | match |
| 198564 | Agilent38MB | 2:169877085 | intronic   | T/T | 4.44E-16 | 1   | 3  | 43 | 99 | 0/0 | 0/0 | 0/0 | match | match | match |
| 108971 | TruSeqV2    | 2:201534389 | missense   | A/A | 2.22E-16 | 76  | 99 | 34 | 99 | 0/0 | 0/0 | 0/0 | match | match | match |
| 115239 | TruSeqV2    | 2:201534389 | missense   | A/A | 2.22E-16 | 58  | 99 | 40 | 99 | 0/0 | 0/0 | 0/0 | match | match | match |
| 132306 | Agilent38MB | 2:201534389 | missense   | A/A | 6.66E-16 | 75  | 99 | 42 | 99 | 0/0 | 0/0 | 0/0 | match | match | match |
| 163383 | TruSeqV2    | 2:201534389 | missense   | A/A | 2.22E-16 | 66  | 99 | 27 | 78 | 0/0 | 0/0 | 0/0 | match | match | match |
| 198564 | Agilent38MB | 2:201534389 | missense   | A/G | 1.49E-14 | 87  | 99 | 35 | 99 | 0/1 | 0/1 | 0/1 | match | match | match |
| 163383 | TruSeqV2    | 2:201541621 | intergenic | C/C | 5.11E-15 | 1   | 3  | 28 | 69 | 0/0 | 0/0 | 0/0 | match | match | match |
| 108971 | TruSeqV2    | 2:204103767 | 5'UTR      | C/C | 1.60E-12 | 26  | 65 | 7  | 18 | 0/0 | 0/0 | 0/0 | match | match | match |
| 115239 | TruSeqV2    | 2:204103767 | 5'UTR      | C/C | 6.66E-16 | 19  | 54 | 6  | 15 | 0/0 | 0/0 | 0/0 | match | match | match |
| 132306 | Agilent38MB | 2:204103767 | 5'UTR      | C/C | 4.44E-16 | 69  | 99 | 1  | 3  | 0/0 | 0/0 | 0/0 | match | match | match |
| 163383 | TruSeqV2    | 2:204103767 | 5'UTR      | C/C | 6.66E-16 | 16  | 48 | 2  | 6  | 0/0 | 0/0 | 0/0 | match | match | match |

|        |             |             |          |     |          |     |    |    |    |     |     |     |       |       |       |
|--------|-------------|-------------|----------|-----|----------|-----|----|----|----|-----|-----|-----|-------|-------|-------|
| 198564 | Agilent38MB | 2:204103767 | 5'UTR    | C/C | 2.00E-15 | 135 | 99 | 28 | 78 | 0/0 | 0/0 | 0/0 | match | match | match |
| 108971 | TruSeqV2    | 2:204111574 | missense | T/T | 2.00E-15 | 151 | 99 | 34 | 93 | 0/0 | 0/0 | 0/0 | match | match | match |
| 115239 | TruSeqV2    | 2:204111574 | missense | T/T | 2.22E-16 | 107 | 99 | 33 | 75 | 0/0 | 0/0 | 0/0 | match | match | match |
| 132306 | Agilent38MB | 2:204111574 | missense | T/T | 4.44E-16 | 307 | 99 | 25 | 66 | 0/0 | 0/0 | 0/0 | match | match | match |
| 163383 | TruSeqV2    | 2:204111574 | missense | T/T | 2.22E-16 | 142 | 99 | 34 | 87 | 0/0 | 0/0 | 0/0 | match | match | match |
| 198564 | Agilent38MB | 2:204111574 | missense | T/T | 5.11E-15 | 618 | 99 | 47 | 99 | 0/0 | 0/0 | 0/0 | match | match | match |
| 108971 | TruSeqV2    | 2:204116690 | missense | T/T | 6.66E-16 | 62  | 99 | 22 | 66 | 1/1 | 1/1 | 1/1 | match | match | match |
| 115239 | TruSeqV2    | 2:204116690 | missense | C/T | 2.22E-15 | 42  | 99 | 31 | 99 | 0/1 | 0/1 | 0/1 | match | match | match |
| 132306 | Agilent38MB | 2:204116690 | missense | T/T | 6.66E-16 | 42  | 99 | 18 | 54 | 1/1 | 1/1 | 1/1 | match | match | match |
| 163383 | TruSeqV2    | 2:204116690 | missense | T/T | 4.44E-16 | 50  | 99 | 29 | 87 | 1/1 | 1/1 | 1/1 | match | match | match |
| 198564 | Agilent38MB | 2:204116690 | missense | T/T | 8.88E-16 | 64  | 99 | 30 | 90 | 1/1 | 1/1 | 1/1 | match | match | match |
| 108971 | TruSeqV2    | 2:204116770 | missense | A/A | 4.44E-16 | 113 | 99 | 18 | 45 | 0/0 | 0/0 | 0/0 | match | match | match |
| 115239 | TruSeqV2    | 2:204116770 | missense | A/A | 4.44E-16 | 78  | 99 | 29 | 75 | 0/0 | 0/0 | 0/0 | match | match | match |
| 132306 | Agilent38MB | 2:204116770 | missense | A/A | 6.66E-16 | 84  | 99 | 16 | 39 | 0/0 | 0/0 | 0/0 | match | match | match |
| 163383 | TruSeqV2    | 2:204116770 | missense | A/A | 4.44E-16 | 94  | 99 | 22 | 48 | 0/0 | 0/0 | 0/0 | match | match | match |
| 198564 | Agilent38MB | 2:204116770 | missense | A/A | 1.33E-15 | 130 | 99 | 24 | 57 | 0/0 | 0/0 | 0/0 | match | match | match |
| 108971 | TruSeqV2    | 2:204154552 | missense | T/T | 6.00E-15 | 21  | 63 | 34 | 99 | 1/1 | 1/1 | 1/1 | match | match | match |
| 115239 | TruSeqV2    | 2:204154552 | missense | C/C | 1.33E-15 | 22  | 60 | 32 | 84 | 0/0 | 0/0 | 0/0 | match | match | match |
| 132306 | Agilent38MB | 2:204154552 | missense | T/T | 3.11E-15 | 72  | 99 | 26 | 78 | 1/1 | 1/1 | 1/1 | match | match | match |
| 163383 | TruSeqV2    | 2:204154552 | missense | C/C | 8.88E-16 | 28  | 70 | 33 | 93 | 0/0 | 0/0 | 0/0 | match | match | match |
| 198564 | Agilent38MB | 2:204154552 | missense | C/T | 4.66E-15 | 169 | 99 | 37 | 99 | 0/1 | 0/1 | 0/1 | match | match | match |
| 108971 | TruSeqV2    | 2:219676973 | stop     | C/C | 8.88E-15 | 147 | 99 | 36 | 99 | 0/0 | 0/0 | 0/0 | match | match | match |
| 115239 | TruSeqV2    | 2:219676973 | stop     | C/C | 6.66E-16 | 102 | 99 | 22 | 57 | 0/0 | 0/0 | 0/0 | match | match | match |
| 132306 | Agilent38MB | 2:219676973 | stop     | C/C | 4.44E-16 | 62  | 99 | 40 | 99 | 0/0 | 0/0 | 0/0 | match | match | match |
| 163383 | TruSeqV2    | 2:219676973 | stop     | C/C | 1.55E-15 | 114 | 99 | 34 | 84 | 0/0 | 0/0 | 0/0 | match | match | match |
| 198564 | Agilent38MB | 2:219676973 | stop     | C/C | 4.00E-15 | 120 | 99 | 39 | 99 | 0/0 | 0/0 | 0/0 | match | match | match |
| 108971 | TruSeqV2    | 2:219676988 | missense | C/C | 3.29E-14 | 151 | 99 | 36 | 99 | 0/0 | 0/0 | 0/0 | match | match | match |
| 115239 | TruSeqV2    | 2:219676988 | missense | C/C | 1.38E-14 | 105 | 99 | 19 | 45 | 0/0 | 0/0 | 0/0 | match | match | match |
| 132306 | Agilent38MB | 2:219676988 | missense | C/C | 1.55E-15 | 64  | 99 | 36 | 93 | 0/0 | 0/0 | 0/0 | match | match | match |
| 163383 | TruSeqV2    | 2:219676988 | missense | C/C | 1.78E-15 | 122 | 99 | 31 | 46 | 0/0 | 0/0 | 0/0 | match | match | match |
| 198564 | Agilent38MB | 2:219676988 | missense | C/C | 2.00E-15 | 148 | 99 | 34 | 93 | 0/0 | 0/0 | 0/0 | match | match | match |
| 108971 | TruSeqV2    | 2:219677004 | missense | C/C | 1.95E-13 | 161 | 99 | 35 | 93 | 0/0 | 0/0 | 0/0 | match | match | match |
| 115239 | TruSeqV2    | 2:219677004 | missense | C/C | 3.11E-15 | 106 | 99 | 20 | 48 | 0/0 | 0/0 | 0/0 | match | match | match |
| 132306 | Agilent38MB | 2:219677004 | missense | C/C | 1.58E-14 | 76  | 99 | 35 | 96 | 0/0 | 0/0 | 0/0 | match | match | match |
| 163383 | TruSeqV2    | 2:219677004 | missense | C/C | 2.18E-14 | 128 | 99 | 30 | 78 | 0/0 | 0/0 | 0/0 | match | match | match |
| 198564 | Agilent38MB | 2:219677004 | missense | C/C | 4.86E-13 | 172 | 99 | 32 | 75 | 0/0 | 0/0 | 0/0 | match | match | match |
| 108971 | TruSeqV2    | 2:219677022 | missense | C/C | 2.22E-16 | 164 | 99 | 38 | 96 | 0/0 | 0/0 | 0/0 | match | match | match |
| 115239 | TruSeqV2    | 2:219677022 | missense | C/C | 2.22E-16 | 113 | 99 | 23 | 57 | 0/0 | 0/0 | 0/0 | match | match | match |

|        |             |             |          |     |          |     |    |    |    |     |     |     |       |       |       |
|--------|-------------|-------------|----------|-----|----------|-----|----|----|----|-----|-----|-----|-------|-------|-------|
| 132306 | Agilent38MB | 2:219677022 | missense | C/C | 6.66E-16 | 78  | 99 | 35 | 75 | 0/0 | 0/0 | 0/0 | match | match | match |
| 163383 | TruSeqV2    | 2:219677022 | missense | C/C | 2.22E-16 | 137 | 99 | 31 | 69 | 0/0 | 0/0 | 0/0 | match | match | match |
| 198564 | Agilent38MB | 2:219677022 | missense | C/C | 2.22E-16 | 163 | 99 | 32 | 81 | 0/0 | 0/0 | 0/0 | match | match | match |
| 108971 | TruSeqV2    | 2:219677319 | stop     | C/C | 2.22E-16 | 103 | 99 | 30 | 87 | 0/0 | 0/0 | 0/0 | match | match | match |
| 115239 | TruSeqV2    | 2:219677319 | stop     | C/C | 2.22E-16 | 77  | 99 | 25 | 66 | 0/0 | 0/0 | 0/0 | match | match | match |
| 132306 | Agilent38MB | 2:219677319 | stop     | C/C | 2.22E-16 | 84  | 99 | 35 | 93 | 0/0 | 0/0 | 0/0 | match | match | match |
| 163383 | TruSeqV2    | 2:219677319 | stop     | C/C | 2.22E-16 | 78  | 99 | 26 | 63 | 0/0 | 0/0 | 0/0 | match | match | match |
| 198564 | Agilent38MB | 2:219677319 | stop     | C/C | 4.44E-16 | 234 | 99 | 42 | 99 | 0/0 | 0/0 | 0/0 | match | match | match |
| 108971 | TruSeqV2    | 2:219679378 | fs       | C/C | 4.44E-16 | 331 | 99 | 28 | 75 | 0/0 | 0/0 | 0/0 | match | match | match |
| 115239 | TruSeqV2    | 2:219679378 | fs       | C/C | 2.22E-16 | 331 | 99 | 28 | 75 | 0/0 | 0/0 | 0/0 | match | match | match |
| 132306 | Agilent38MB | 2:219679378 | fs       | C/C | 3.33E-15 | 331 | 99 | 28 | 75 | 0/0 | 0/0 | 0/0 | match | match | match |
| 163383 | TruSeqV2    | 2:219679378 | fs       | C/C | 8.88E-16 | 331 | 99 | 28 | 75 | 0/0 | 0/0 | 0/0 | match | match | match |
| 198564 | Agilent38MB | 2:219679378 | fs       | C/C | 6.24E-14 | 331 | 99 | 28 | 75 | 0/0 | 0/0 | 0/0 | match | match | match |
| 108971 | TruSeqV2    | 2:234526666 | missense | T/T | 8.88E-16 | 157 | 99 | 51 | 99 | 0/0 | 0/0 | 0/0 | match | match | match |
| 115239 | TruSeqV2    | 2:234526666 | missense | T/T | 6.66E-16 | 113 | 99 | 35 | 93 | 0/0 | 0/0 | 0/0 | match | match | match |
| 132306 | Agilent38MB | 2:234526666 | missense | T/T | 6.44E-15 | 183 | 99 | 43 | 99 | 0/0 | 0/0 | 0/0 | match | match | match |
| 163383 | TruSeqV2    | 2:234526666 | missense | T/T | 6.66E-16 | 140 | 99 | 34 | 78 | 0/0 | 0/0 | 0/0 | match | match | match |
| 198564 | Agilent38MB | 2:234526666 | missense | T/T | 4.44E-16 | 274 | 99 | 57 | 99 | 0/0 | 0/0 | 0/0 | match | match | match |
| 108971 | TruSeqV2    | 2:234526668 | synon    | G/G | 4.44E-16 | 150 | 99 | 53 | 99 | 0/0 | 0/0 | 0/0 | match | match | match |
| 115239 | TruSeqV2    | 2:234526668 | synon    | G/G | 4.44E-16 | 109 | 99 | 35 | 93 | 0/0 | 0/0 | 0/0 | match | match | match |
| 132306 | Agilent38MB | 2:234526668 | synon    | G/G | 2.22E-16 | 178 | 99 | 44 | 99 | 0/0 | 0/0 | 0/0 | match | match | match |
| 163383 | TruSeqV2    | 2:234526668 | synon    | G/G | 4.44E-16 | 140 | 99 | 35 | 93 | 0/0 | 0/0 | 0/0 | match | match | match |
| 198564 | Agilent38MB | 2:234526668 | synon    | G/G | 8.88E-16 | 275 | 99 | 56 | 99 | 0/0 | 0/0 | 0/0 | match | match | match |
| 108971 | TruSeqV2    | 2:234526680 | missense | T/T | 2.89E-15 | 134 | 99 | 50 | 99 | 0/0 | 0/0 | 0/0 | match | match | match |
| 115239 | TruSeqV2    | 2:234526680 | missense | T/T | 4.44E-16 | 99  | 99 | 34 | 81 | 0/0 | 0/0 | 0/0 | match | match | match |
| 132306 | Agilent38MB | 2:234526680 | missense | T/T | 3.11E-15 | 164 | 99 | 46 | 99 | 0/0 | 0/0 | 0/0 | match | match | match |
| 163383 | TruSeqV2    | 2:234526680 | missense | T/T | 2.22E-15 | 133 | 99 | 34 | 90 | 0/0 | 0/0 | 0/0 | match | match | match |
| 198564 | Agilent38MB | 2:234526680 | missense | T/T | 2.55E-14 | 256 | 99 | 57 | 99 | 0/0 | 0/0 | 0/0 | match | match | match |
| 108971 | TruSeqV2    | 2:234526681 | missense | C/C | 8.88E-16 | 132 | 99 | 49 | 99 | 0/0 | 0/0 | 0/0 | match | match | match |
| 115239 | TruSeqV2    | 2:234526681 | missense | C/C | 2.22E-16 | 98  | 99 | 32 | 81 | 0/0 | 0/0 | 0/0 | match | match | match |
| 132306 | Agilent38MB | 2:234526681 | missense | C/C | 2.22E-16 | 162 | 99 | 46 | 99 | 0/0 | 0/0 | 0/0 | match | match | match |
| 163383 | TruSeqV2    | 2:234526681 | missense | C/C | 6.66E-16 | 129 | 99 | 34 | 90 | 0/0 | 0/0 | 0/0 | match | match | match |
| 198564 | Agilent38MB | 2:234526681 | missense | C/C | 1.55E-15 | 258 | 99 | 58 | 99 | 0/0 | 0/0 | 0/0 | match | match | match |
| 108971 | TruSeqV2    | 2:234526705 | missense | A/A | 2.22E-16 | 120 | 99 | 51 | 99 | 0/0 | 0/0 | 0/0 | match | match | match |
| 115239 | TruSeqV2    | 2:234526705 | missense | A/A | 4.44E-16 | 71  | 99 | 31 | 78 | 0/0 | 0/0 | 0/0 | match | match | match |
| 132306 | Agilent38MB | 2:234526705 | missense | A/A | 2.22E-16 | 152 | 99 | 43 | 99 | 0/0 | 0/0 | 0/0 | match | match | match |
| 163383 | TruSeqV2    | 2:234526705 | missense | A/A | 4.44E-16 | 112 | 99 | 40 | 99 | 0/0 | 0/0 | 0/0 | match | match | match |
| 198564 | Agilent38MB | 2:234526705 | missense | A/A | 1.11E-15 | 279 | 99 | 54 | 99 | 0/0 | 0/0 | 0/0 | match | match | match |

|        |             |             |          |     |          |     |    |    |    |     |     |     |       |       |       |
|--------|-------------|-------------|----------|-----|----------|-----|----|----|----|-----|-----|-----|-------|-------|-------|
| 108971 | TruSeqV2    | 2:234526975 | missense | C/C | 2.23E-11 | 398 | 99 | 51 | 99 | 0/0 | 0/0 | 0/0 | match | match | match |
| 115239 | TruSeqV2    | 2:234526975 | missense | C/C | 4.44E-15 | 272 | 99 | 29 | 87 | 0/0 | 0/0 | 0/0 | match | match | match |
| 132306 | Agilent38MB | 2:234526975 | missense | C/C | 8.88E-16 | 377 | 99 | 46 | 99 | 0/0 | 0/0 | 0/0 | match | match | match |
| 163383 | TruSeqV2    | 2:234526975 | missense | C/C | 2.34E-12 | 387 | 99 | 34 | 96 | 0/0 | 0/0 | 0/0 | match | match | match |
| 198564 | Agilent38MB | 2:234526975 | missense | C/C | 1.11E-15 | 618 | 99 | 38 | 99 | 0/0 | 0/0 | 0/0 | match | match | match |
| 108971 | TruSeqV2    | 2:234526987 | missense | A/A | 6.88E-15 | 384 | 99 | 49 | 99 | 0/0 | 0/0 | 0/0 | match | match | match |
| 115239 | TruSeqV2    | 2:234526987 | missense | A/A | 6.66E-16 | 257 | 99 | 38 | 99 | 0/0 | 0/0 | 0/0 | match | match | match |
| 132306 | Agilent38MB | 2:234526987 | missense | A/A | 4.88E-15 | 395 | 99 | 44 | 99 | 0/0 | 0/0 | 0/0 | match | match | match |
| 163383 | TruSeqV2    | 2:234526987 | missense | A/A | 4.44E-16 | 376 | 99 | 41 | 99 | 0/0 | 0/0 | 0/0 | match | match | match |
| 198564 | Agilent38MB | 2:234526987 | missense | A/A | 2.22E-16 | 599 | 99 | 39 | 99 | 0/0 | 0/0 | 0/0 | match | match | match |
| 108971 | TruSeqV2    | 2:234527001 | missense | A/A | 1.78E-15 | 365 | 99 | 47 | 99 | 0/0 | 0/0 | 0/0 | match | match | match |
| 115239 | TruSeqV2    | 2:234527001 | missense | A/A | 6.66E-16 | 231 | 99 | 46 | 99 | 0/0 | 0/0 | 0/0 | match | match | match |
| 132306 | Agilent38MB | 2:234527001 | missense | A/A | 5.77E-15 | 402 | 99 | 38 | 99 | 0/0 | 0/0 | 0/0 | match | match | match |
| 163383 | TruSeqV2    | 2:234527001 | missense | A/A | 6.66E-16 | 362 | 99 | 43 | 99 | 0/0 | 0/0 | 0/0 | match | match | match |
| 198564 | Agilent38MB | 2:234527001 | missense | A/A | 1.78E-15 | 541 | 99 | 38 | 99 | 0/0 | 0/0 | 0/0 | match | match | match |
| 108971 | TruSeqV2    | 2:234527183 | missense | G/G | 2.22E-16 | 273 | 99 | 39 | 99 | 0/0 | 0/0 | 0/0 | match | match | match |
| 115239 | TruSeqV2    | 2:234527183 | missense | G/G | 2.22E-16 | 175 | 99 | 47 | 99 | 0/0 | 0/0 | 0/0 | match | match | match |
| 132306 | Agilent38MB | 2:234527183 | missense | G/G | 2.22E-16 | 559 | 99 | 32 | 93 | 0/0 | 0/0 | 0/0 | match | match | match |
| 163383 | TruSeqV2    | 2:234527183 | missense | G/G | 2.22E-16 | 225 | 99 | 43 | 99 | 0/0 | 0/0 | 0/0 | match | match | match |
| 198564 | Agilent38MB | 2:234527183 | missense | G/G | 1.55E-15 | 942 | 99 | 37 | 99 | 0/0 | 0/0 | 0/0 | match | match | match |
| 108971 | TruSeqV2    | 2:234545345 | missense | G/G | 6.66E-16 | 179 | 99 | 39 | 99 | 0/0 | 0/0 | 0/0 | match | match | match |
| 115239 | TruSeqV2    | 2:234545345 | missense | G/G | 2.22E-16 | 95  | 99 | 23 | 69 | 0/0 | 0/0 | 0/0 | match | match | match |
| 132306 | Agilent38MB | 2:234545345 | missense | G/G | 2.22E-16 | 178 | 99 | 28 | 75 | 0/0 | 0/0 | 0/0 | match | match | match |
| 163383 | TruSeqV2    | 2:234545345 | missense | G/G | 2.22E-16 | 164 | 99 | 24 | 69 | 0/0 | 0/0 | 0/0 | match | match | match |
| 198564 | Agilent38MB | 2:234545345 | missense | G/G | 2.22E-16 | 342 | 99 | 37 | 90 | 0/0 | 0/0 | 0/0 | match | match | match |
| 108971 | TruSeqV2    | 2:234545765 | synon    | T/T | 4.44E-16 | 415 | 99 | 49 | 99 | 0/0 | 0/0 | 0/0 | match | match | match |
| 115239 | TruSeqV2    | 2:234545765 | synon    | T/T | 6.66E-16 | 259 | 99 | 54 | 99 | 0/0 | 0/0 | 0/0 | match | match | match |
| 132306 | Agilent38MB | 2:234545765 | synon    | T/T | 8.22E-15 | 415 | 99 | 22 | 51 | 0/0 | 0/0 | 0/0 | match | match | match |
| 163383 | TruSeqV2    | 2:234545765 | synon    | T/T | 2.22E-16 | 312 | 99 | 35 | 87 | 0/0 | 0/0 | 0/0 | match | match | match |
| 198564 | Agilent38MB | 2:234545765 | synon    | T/T | 2.22E-16 | 826 | 99 | 38 | 99 | 0/0 | 0/0 | 0/0 | match | match | match |
| 108971 | TruSeqV2    | 2:234545773 | missense | C/C | 4.44E-16 | 425 | 99 | 47 | 99 | 0/0 | 0/0 | 0/0 | match | match | match |
| 115239 | TruSeqV2    | 2:234545773 | missense | C/C | 2.22E-16 | 259 | 99 | 62 | 99 | 0/0 | 0/0 | 0/0 | match | match | match |
| 132306 | Agilent38MB | 2:234545773 | missense | C/C | 6.66E-16 | 398 | 99 | 22 | 60 | 0/0 | 0/0 | 0/0 | match | match | match |
| 163383 | TruSeqV2    | 2:234545773 | missense | C/C | 2.22E-16 | 309 | 99 | 33 | 93 | 0/0 | 0/0 | 0/0 | match | match | match |
| 198564 | Agilent38MB | 2:234545773 | missense | C/C | 2.22E-16 | 815 | 99 | 38 | 99 | 0/0 | 0/0 | 0/0 | match | match | match |
| 108971 | TruSeqV2    | 2:234580463 | promoter | T/T | 3.91E-14 | 14  | 36 | 39 | 99 | 0/0 | 0/0 | 0/0 | match | match | match |
| 115239 | TruSeqV2    | 2:234580463 | promoter | -/- | 1.65E-13 | 14  | 36 | 39 | 99 | 0/0 | 0/0 | 0/0 | match | match | match |
| 108971 | TruSeqV2    | 2:234580589 | missense | C/C | 2.22E-16 | 95  | 99 | 37 | 99 | 0/0 | 0/0 | 0/0 | match | match | match |

|        |             |             |          |     |          |      |    |    |    |     |     |     |       |       |       |
|--------|-------------|-------------|----------|-----|----------|------|----|----|----|-----|-----|-----|-------|-------|-------|
| 115239 | TruSeqV2    | 2:234580589 | missense | C/C | 2.22E-16 | 60   | 99 | 48 | 99 | 0/0 | 0/0 | 0/0 | match | match | match |
| 132306 | Agilent38MB | 2:234580589 | missense | C/C | 2.22E-16 | 88   | 99 | 40 | 71 | 0/0 | 0/0 | 0/0 | match | match | match |
| 163383 | TruSeqV2    | 2:234580589 | missense | C/C | 2.22E-16 | 96   | 99 | 37 | 99 | 0/0 | 0/0 | 0/0 | match | match | match |
| 198564 | Agilent38MB | 2:234580589 | missense | C/C | 2.22E-16 | 220  | 99 | 45 | 99 | 0/0 | 0/0 | 0/0 | match | match | match |
| 108971 | TruSeqV2    | 2:234580678 | missense | T/T | 2.22E-16 | 162  | 99 | 43 | 96 | 0/0 | 0/0 | 0/0 | match | match | match |
| 115239 | TruSeqV2    | 2:234580678 | missense | T/T | 4.44E-16 | 105  | 99 | 28 | 72 | 0/0 | 0/0 | 0/0 | match | match | match |
| 132306 | Agilent38MB | 2:234580678 | missense | T/T | 6.66E-16 | 128  | 99 | 31 | 75 | 0/0 | 0/0 | 0/0 | match | match | match |
| 163383 | TruSeqV2    | 2:234580678 | missense | T/T | 2.22E-16 | 149  | 99 | 26 | 72 | 0/0 | 0/0 | 0/0 | match | match | match |
| 198564 | Agilent38MB | 2:234580678 | missense | T/T | 2.22E-16 | 261  | 99 | 37 | 99 | 0/0 | 0/0 | 0/0 | match | match | match |
| 108971 | TruSeqV2    | 2:234581306 | stop     | T/T | 6.66E-16 | 262  | 99 | 52 | 99 | 0/0 | 0/0 | 0/0 | match | match | match |
| 115239 | TruSeqV2    | 2:234581306 | stop     | T/T | 6.66E-16 | 154  | 99 | 52 | 99 | 0/0 | 0/0 | 0/0 | match | match | match |
| 132306 | Agilent38MB | 2:234581306 | stop     | T/T | 1.55E-15 | 623  | 99 | 34 | 90 | 0/0 | 0/0 | 0/0 | match | match | match |
| 163383 | TruSeqV2    | 2:234581306 | stop     | T/T | 4.88E-15 | 235  | 99 | 36 | 96 | 0/0 | 0/0 | 0/0 | match | match | match |
| 198564 | Agilent38MB | 2:234581306 | stop     | T/T | 6.66E-16 | 941  | 99 | 48 | 99 | 0/0 | 0/0 | 0/0 | match | match | match |
| 108971 | TruSeqV2    | 2:234581346 | missense | G/G | 2.22E-16 | 307  | 99 | 41 | 99 | 0/0 | 0/0 | 0/0 | match | match | match |
| 115239 | TruSeqV2    | 2:234581346 | missense | G/G | 2.22E-16 | 162  | 99 | 46 | 99 | 0/0 | 0/0 | 0/0 | match | match | match |
| 132306 | Agilent38MB | 2:234581346 | missense | G/G | 4.44E-16 | 553  | 99 | 29 | 69 | 0/0 | 0/0 | 0/0 | match | match | match |
| 163383 | TruSeqV2    | 2:234581346 | missense | G/G | 2.22E-16 | 237  | 99 | 37 | 99 | 0/0 | 0/0 | 0/0 | match | match | match |
| 198564 | Agilent38MB | 2:234581346 | missense | G/G | 7.80E-11 | 1074 | 99 | 47 | 99 | 0/0 | 0/0 | 0/0 | match | match | match |
| 108971 | TruSeqV2    | 2:234581410 | missense | G/G | 2.22E-16 | 323  | 99 | 38 | 99 | 0/0 | 0/0 | 0/0 | match | match | match |
| 115239 | TruSeqV2    | 2:234581410 | missense | G/G | 2.22E-16 | 182  | 99 | 39 | 99 | 0/0 | 0/0 | 0/0 | match | match | match |
| 132306 | Agilent38MB | 2:234581410 | missense | G/G | 2.22E-16 | 476  | 99 | 34 | 99 | 0/0 | 0/0 | 0/0 | match | match | match |
| 163383 | TruSeqV2    | 2:234581410 | missense | G/G | 2.22E-16 | 226  | 99 | 35 | 90 | 0/0 | 0/0 | 0/0 | match | match | match |
| 198564 | Agilent38MB | 2:234581410 | missense | G/G | 2.22E-15 | 889  | 99 | 45 | 99 | 0/0 | 0/0 | 0/0 | match | match | match |
| 108971 | TruSeqV2    | 2:234590527 | promoter | T/T | 6.66E-16 | 70   | 99 | 53 | 99 | 0/0 | 0/0 | 0/0 | match | match | match |
| 115239 | TruSeqV2    | 2:234590527 | promoter | G/T | 2.22E-15 | 42   | 99 | 46 | 99 | 0/1 | 0/1 | 0/1 | match | match | match |
| 132306 | Agilent38MB | 2:234590527 | promoter | G/T | 1.33E-15 | 62   | 99 | 41 | 99 | 0/1 | 0/1 | 0/1 | match | match | match |
| 163383 | TruSeqV2    | 2:234590527 | promoter | T/T | 6.66E-16 | 59   | 99 | 45 | 99 | 0/0 | 0/0 | 0/0 | match | match | match |
| 198564 | Agilent38MB | 2:234590527 | promoter | T/T | 2.66E-15 | 113  | 99 | 44 | 99 | 0/0 | 0/0 | 0/0 | match | match | match |
| 108971 | TruSeqV2    | 2:234590926 | missense | G/G | 4.44E-16 | 119  | 99 | 32 | 84 | 0/0 | 0/0 | 0/0 | match | match | match |
| 115239 | TruSeqV2    | 2:234590926 | missense | G/G | 4.44E-16 | 76   | 99 | 49 | 99 | 0/0 | 0/0 | 0/0 | match | match | match |
| 132306 | Agilent38MB | 2:234590926 | missense | G/G | 2.00E-15 | 96   | 99 | 39 | 90 | 0/0 | 0/0 | 0/0 | match | match | match |
| 163383 | TruSeqV2    | 2:234590926 | missense | G/G | 8.88E-16 | 150  | 99 | 53 | 99 | 0/0 | 0/0 | 0/0 | match | match | match |
| 198564 | Agilent38MB | 2:234590926 | missense | G/G | 6.66E-16 | 190  | 99 | 42 | 99 | 0/0 | 0/0 | 0/0 | match | match | match |
| 108971 | TruSeqV2    | 2:234601669 | missense | T/T | 2.22E-16 | 108  | 99 | 36 | 96 | 0/0 | 0/0 | 0/0 | match | match | match |
| 115239 | TruSeqV2    | 2:234601669 | missense | G/T | 2.22E-16 | 74   | 99 | 39 | 99 | 0/1 | 0/1 | 0/1 | match | match | match |
| 132306 | Agilent38MB | 2:234601669 | missense | G/T | 2.22E-16 | 75   | 99 | 27 | 99 | 0/1 | 0/1 | 0/1 | match | match | match |
| 163383 | TruSeqV2    | 2:234601669 | missense | T/T | 6.66E-16 | 82   | 99 | 38 | 99 | 0/0 | 0/0 | 0/0 | match | match | match |



|        |             |             |          |     |             |     |    |    |    |     |     |     |       |       |       |
|--------|-------------|-------------|----------|-----|-------------|-----|----|----|----|-----|-----|-----|-------|-------|-------|
| 198564 | Agilent38MB | 2:234601669 | missense | T/T | 2.89E-12    | 153 | 99 | 42 | 99 | 0/0 | 0/0 | 0/0 | match | match | match |
| 108971 | TruSeqV2    | 2:234601707 | synon    | A/A | 1.11E-15    | 90  | 99 | 28 | 75 | 0/0 | 0/0 | 0/0 | match | match | match |
| 115239 | TruSeqV2    | 2:234601707 | synon    | A/A | 2.22E-16    | 60  | 99 | 35 | 93 | 0/0 | 0/0 | 0/0 | match | match | match |
| 132306 | Agilent38MB | 2:234601707 | synon    | A/A | 6.66E-16    | 70  | 99 | 27 | 62 | 0/0 | 0/0 | 0/0 | match | match | match |
| 163383 | TruSeqV2    | 2:234601707 | synon    | A/A | 4.44E-16    | 73  | 99 | 30 | 72 | 0/0 | 0/0 | 0/0 | match | match | match |
| 198564 | Agilent38MB | 2:234601707 | synon    | A/A | 2.22E-16    | 133 | 99 | 40 | 96 | 0/0 | 0/0 | 0/0 | match | match | match |
| 108971 | TruSeqV2    | 2:234601859 | missense | C/C | 4.44E-16    | 114 | 99 | 47 | 99 | 0/0 | 0/0 | 0/0 | match | match | match |
| 115239 | TruSeqV2    | 2:234601859 | missense | C/C | 6.66E-16    | 88  | 99 | 33 | 75 | 0/0 | 0/0 | 0/0 | match | match | match |
| 132306 | Agilent38MB | 2:234601859 | missense | C/C | 2.22E-16    | 105 | 99 | 38 | 96 | 0/0 | 0/0 | 0/0 | match | match | match |
| 163383 | TruSeqV2    | 2:234601859 | missense | C/C | 4.44E-16    | 93  | 99 | 46 | 99 | 0/0 | 0/0 | 0/0 | match | match | match |
| 198564 | Agilent38MB | 2:234601859 | missense | C/C | 7.13E-14    | 158 | 99 | 61 | 99 | 0/0 | 0/0 | 0/0 | match | match | match |
| 108971 | TruSeqV2    | 2:234601965 | synon    | A/A | 4.44E-16    | 112 | 99 | 52 | 99 | 0/0 | 0/0 | 0/0 | match | match | match |
| 115239 | TruSeqV2    | 2:234601965 | synon    | A/G | 2.00E-15    | 74  | 99 | 47 | 99 | 0/1 | 0/1 | 0/1 | match | match | match |
| 132306 | Agilent38MB | 2:234601965 | synon    | A/G | 2.66E-15    | 75  | 99 | 34 | 99 | 0/1 | 0/1 | 0/1 | match | match | match |
| 163383 | TruSeqV2    | 2:234601965 | synon    | A/A | 4.44E-16    | 92  | 99 | 37 | 96 | 0/0 | 0/0 | 0/0 | match | match | match |
| 198564 | Agilent38MB | 2:234601965 | synon    | A/A | 4.44E-15    | 119 | 99 | 35 | 93 | 0/0 | 0/0 | 0/0 | match | match | match |
| 108971 | TruSeqV2    | 2:234602191 | missense | A/A | 8.44E-15    | 185 | 99 | 44 | 99 | 0/0 | 0/0 | 0/0 | match | match | match |
| 115239 | TruSeqV2    | 2:234602191 | missense | A/G | 6.64E-06    | 112 | 99 | 34 | 99 | 0/1 | 0/1 | 0/1 | match | match | match |
| 163383 | TruSeqV2    | 2:234602191 | missense | A/A | 4.58E-13    | 128 | 99 | 47 | 99 | 0/0 | 0/0 | 0/0 | match | match | match |
| 198564 | Agilent38MB | 2:234602191 | missense | A/A | 2.09E-11    | 238 | 99 | 42 | 99 | 0/0 | 0/0 | 0/0 | match | match | match |
| 108971 | TruSeqV2    | 2:234602277 | synon    | G/G | 4.44E-16    | 104 | 99 | 50 | 99 | 0/0 | 0/0 | 0/0 | match | match | match |
| 115239 | TruSeqV2    | 2:234602277 | synon    | G/G | 1.55E-15    | 71  | 99 | 28 | 75 | 0/0 | 0/0 | 0/0 | match | match | match |
| 132306 | Agilent38MB | 2:234602277 | synon    | G/G | 4.44E-16    | 35  | 72 | 23 | 57 | 0/0 | 0/0 | 0/0 | match | match | match |
| 163383 | TruSeqV2    | 2:234602277 | synon    | G/G | 2.89E-15    | 90  | 99 | 40 | 99 | 0/0 | 0/0 | 0/0 | match | match | match |
| 198564 | Agilent38MB | 2:234602277 | synon    | G/G | 2.22E-16    | 48  | 99 | 48 | 99 | 0/0 | 0/0 | 0/0 | match | match | match |
| 108971 | TruSeqV2    | 2:234621869 | missense | A/A | 8.88E-16    | 136 | 99 | 41 | 99 | 0/0 | 0/0 | 0/0 | match | match | match |
| 115239 | TruSeqV2    | 2:234621869 | missense | A/A | 4.44E-16    | 73  | 99 | 35 | 99 | 0/0 | 0/0 | 0/0 | match | match | match |
| 132306 | Agilent38MB | 2:234621869 | missense | A/A | 4.44E-16    | 198 | 99 | 34 | 93 | 0/0 | 0/0 | 0/0 | match | match | match |
| 163383 | TruSeqV2    | 2:234621869 | missense | A/A | 1.55E-15    | 88  | 99 | 37 | 96 | 0/0 | 0/0 | 0/0 | match | match | match |
| 198564 | Agilent38MB | 2:234621869 | missense | A/A | 1.73E-14    | 311 | 99 | 50 | 99 | 0/0 | 0/0 | 0/0 | match | match | match |
| 108971 | TruSeqV2    | 2:234621922 | synon    | T/T | 2.22E-16    | 137 | 99 | 42 | 99 | 0/0 | 0/0 | 0/0 | match | match | match |
| 115239 | TruSeqV2    | 2:234621922 | synon    | T/T | 2.22E-16    | 73  | 99 | 46 | 99 | 0/0 | 0/0 | 0/0 | match | match | match |
| 132306 | Agilent38MB | 2:234621922 | synon    | T/T | 2.22E-16    | 153 | 99 | 45 | 99 | 0/0 | 0/0 | 0/0 | match | match | match |
| 163383 | TruSeqV2    | 2:234621922 | synon    | T/T | 2.22E-16    | 101 | 99 | 37 | 90 | 0/0 | 0/0 | 0/0 | match | match | match |
| 198564 | Agilent38MB | 2:234621922 | synon    | T/T | 4.44E-16    | 217 | 99 | 50 | 99 | 0/0 | 0/0 | 0/0 | match | match | match |
| 108971 | TruSeqV2    | 2:234622061 | missense | C/C | 1.03E-06    | 235 | 99 | 36 | 93 | 0/0 | 0/0 | 0/0 | match | match | match |
| 115239 | TruSeqV2    | 2:234622061 | missense | A/C | 6.57E-14    | 141 | 99 | 32 | 99 | 0/1 | 0/1 | 0/1 | match | match | match |
| 132306 | Agilent38MB | 2:234622061 | missense | C/C | 0.000171099 | 394 | 99 | 32 | 84 | 0/0 | 0/0 | 0/0 | match | match | match |

|        |             |             |          |     |             |     |    |    |    |     |     |     |       |       |       |
|--------|-------------|-------------|----------|-----|-------------|-----|----|----|----|-----|-----|-----|-------|-------|-------|
| 163383 | TruSeqV2    | 2:234622061 | missense | C/C | 1.88E-05    | 165 | 99 | 37 | 99 | 0/0 | 0/0 | 0/0 | match | match | match |
| 198564 | Agilent38MB | 2:234622061 | missense | C/C | 1.03E-07    | 694 | 99 | 43 | 99 | 0/0 | 0/0 | 0/0 | match | match | match |
| 108971 | TruSeqV2    | 2:234622258 | fs       | C/C | 2.22E-16    | 472 | 99 | 52 | 99 | 0/0 | 0/0 | 0/0 | match | match | match |
| 115239 | TruSeqV2    | 2:234622258 | fs       | C/C | 2.22E-16    | 472 | 99 | 52 | 99 | 0/0 | 0/0 | 0/0 | match | match | match |
| 132306 | Agilent38MB | 2:234622258 | fs       | C/C | 6.58E-11    | 472 | 99 | 52 | 99 | 0/0 | 0/0 | 0/0 | match | match | match |
| 163383 | TruSeqV2    | 2:234622258 | fs       | C/C | 2.22E-16    | 472 | 99 | 52 | 99 | 0/0 | 0/0 | 0/0 | match | match | match |
| 198564 | Agilent38MB | 2:234622258 | fs       | C/C | 2.22E-16    | 472 | 99 | 52 | 99 | 0/0 | 0/0 | 0/0 | match | match | match |
| 108971 | TruSeqV2    | 2:234627536 | missense | C/C | 2.75E-14    | 184 | 99 | 26 | 72 | 0/0 | 0/0 | 0/0 | match | match | match |
| 115239 | TruSeqV2    | 2:234627536 | missense | C/C | 2.53E-14    | 123 | 99 | 14 | 36 | 0/0 | 0/0 | 0/0 | match | match | match |
| 132306 | Agilent38MB | 2:234627536 | missense | C/C | 1.11E-15    | 65  | 99 | 29 | 69 | 0/0 | 0/0 | 0/0 | match | match | match |
| 163383 | TruSeqV2    | 2:234627536 | missense | C/C | 1.33E-15    | 133 | 99 | 34 | 99 | 0/0 | 0/0 | 0/0 | match | match | match |
| 198564 | Agilent38MB | 2:234627536 | missense | C/C | 8.88E-16    | 120 | 99 | 33 | 87 | 0/0 | 0/0 | 0/0 | match | match | match |
| 108971 | TruSeqV2    | 2:234628087 | fs       | C/C | 8.99E-14    | 564 | 99 | 47 | 99 | 0/0 | 0/0 | 0/0 | match | match | match |
| 115239 | TruSeqV2    | 2:234628087 | fs       | C/C | 2.68E-13    | 564 | 99 | 47 | 99 | 0/0 | 0/0 | 0/0 | match | match | match |
| 132306 | Agilent38MB | 2:234628087 | fs       | C/C | 4.24E-14    | 564 | 99 | 47 | 99 | 0/0 | 0/0 | 0/0 | match | match | match |
| 163383 | TruSeqV2    | 2:234628087 | fs       | C/C | 2.44E-15    | 564 | 99 | 47 | 99 | 0/0 | 0/0 | 0/0 | match | match | match |
| 198564 | Agilent38MB | 2:234628087 | fs       | C/C | 2.22E-16    | 564 | 99 | 47 | 99 | 0/0 | 0/0 | 0/0 | match | match | match |
| 108971 | TruSeqV2    | 2:234637789 | missense | A/A | 1.33E-15    | 163 | 99 | 36 | 81 | 0/0 | 0/0 | 0/0 | match | match | match |
| 115239 | TruSeqV2    | 2:234637789 | missense | A/A | 5.11E-15    | 100 | 99 | 16 | 21 | 0/0 | 0/0 | 0/0 | match | match | match |
| 132306 | Agilent38MB | 2:234637789 | missense | A/A | 2.22E-16    | 121 | 99 | 29 | 81 | 0/0 | 0/0 | 0/0 | match | match | match |
| 163383 | TruSeqV2    | 2:234637789 | missense | A/A | 4.44E-16    | 150 | 99 | 25 | 66 | 0/0 | 0/0 | 0/0 | match | match | match |
| 198564 | Agilent38MB | 2:234637789 | missense | A/A | 2.00E-15    | 280 | 99 | 21 | 51 | 0/0 | 0/0 | 0/0 | match | match | match |
| 108971 | TruSeqV2    | 2:234637803 | missense | T/T | 9.02E-13    | 163 | 99 | 25 | 66 | 0/0 | 0/0 | 0/0 | match | match | match |
| 115239 | TruSeqV2    | 2:234637803 | missense | C/C | 7.55E-05    | 97  | 99 | 6  | 18 | 1/1 | 1/1 | 1/1 | match | match | match |
| 132306 | Agilent38MB | 2:234637803 | missense | C/T | 3.69E-08    | 95  | 99 | 35 | 99 | 0/1 | 0/1 | 0/1 | match | match | match |
| 163383 | TruSeqV2    | 2:234637803 | missense | T/T | 6.58E-11    | 152 | 99 | 26 | 66 | 0/0 | 0/0 | 0/0 | match | match | match |
| 198564 | Agilent38MB | 2:234637803 | missense | T/T | 1.03E-09    | 215 | 99 | 20 | 54 | 0/0 | 0/0 | 0/0 | match | match | match |
| 108971 | TruSeqV2    | 2:234637853 | synon    | G/G | 2.50E-12    | 229 | 99 | 32 | 74 | 0/0 | 0/0 | 0/0 | match | match | match |
| 115239 | TruSeqV2    | 2:234637853 | synon    | A/A | 6.97E-11    | 130 | 99 | 20 | 60 | 1/1 | 1/1 | 1/1 | match | match | match |
| 132306 | Agilent38MB | 2:234637853 | synon    | A/G | 1.21E-11    | 65  | 99 | 38 | 99 | 0/1 | 0/1 | 0/1 | match | match | match |
| 163383 | TruSeqV2    | 2:234637853 | synon    | G/G | 1.09E-13    | 186 | 99 | 27 | 69 | 0/0 | 0/0 | 0/0 | match | match | match |
| 198564 | Agilent38MB | 2:234637853 | synon    | G/G | 6.55E-14    | 118 | 99 | 29 | 84 | 0/0 | 0/0 | 0/0 | match | match | match |
| 108971 | TruSeqV2    | 2:234637905 | missense | C/C | 4.44E-16    | 238 | 99 | 31 | 72 | 0/0 | 0/0 | 0/0 | match | match | match |
| 115239 | TruSeqV2    | 2:234637905 | missense | C/C | 6.66E-16    | 168 | 99 | 29 | 75 | 0/0 | 0/0 | 0/0 | match | match | match |
| 132306 | Agilent38MB | 2:234637905 | missense | C/C | 6.66E-16    | 53  | 99 | 34 | 96 | 0/0 | 0/0 | 0/0 | match | match | match |
| 163383 | TruSeqV2    | 2:234637905 | missense | C/C | 8.88E-16    | 212 | 99 | 37 | 99 | 0/0 | 0/0 | 0/0 | match | match | match |
| 198564 | Agilent38MB | 2:234637905 | missense | C/C | 8.88E-16    | 132 | 99 | 44 | 99 | 0/0 | 0/0 | 0/0 | match | match | match |
| 108971 | TruSeqV2    | 2:234638249 | synon    | A/A | 0.000331103 | 154 | 99 | 22 | 57 | 0/0 | 0/0 | 0/0 | match | match | match |

|        |             |             |           |             |          |     |    |    |    |     |     |     |       |       |       |
|--------|-------------|-------------|-----------|-------------|----------|-----|----|----|----|-----|-----|-----|-------|-------|-------|
| 115239 | TruSeqV2    | 2:234638249 | synon     | G/G         | 1.55E-15 | 109 | 99 | 19 | 18 | 1/1 | 1/1 | 1/1 | match | match | match |
| 132306 | Agilent38MB | 2:234638249 | synon     | A/G         | 2.66E-09 | 330 | 99 | 27 | 99 | 0/1 | 0/1 | 0/1 | match | match | match |
| 163383 | TruSeqV2    | 2:234638249 | synon     | A/A         | 2.11E-07 | 119 | 99 | 33 | 84 | 0/0 | 0/0 | 0/0 | match | match | match |
| 198564 | Agilent38MB | 2:234638249 | synon     | A/A         | 7.40E-05 | 653 | 99 | 33 | 81 | 0/0 | 0/0 | 0/0 | match | match | match |
| 108971 | TruSeqV2    | 2:234638301 | fs        | C/C         | 4.44E-16 | 220 | 99 | 38 | 99 | 0/0 | 0/0 | 0/0 | match | match | match |
| 115239 | TruSeqV2    | 2:234638301 | fs        | C/C         | 2.22E-16 | 220 | 99 | 38 | 99 | 0/0 | 0/0 | 0/0 | match | match | match |
| 132306 | Agilent38MB | 2:234638301 | fs        | C/C         | 8.88E-16 | 220 | 99 | 38 | 99 | 0/0 | 0/0 | 0/0 | match | match | match |
| 163383 | TruSeqV2    | 2:234638301 | fs        | C/C         | 4.44E-16 | 220 | 99 | 38 | 99 | 0/0 | 0/0 | 0/0 | match | match | match |
| 198564 | Agilent38MB | 2:234638301 | fs        | C/C         | 2.22E-16 | 220 | 99 | 38 | 99 | 0/0 | 0/0 | 0/0 | match | match | match |
|        |             |             | stop      |             |          |     |    |    |    |     |     |     |       |       |       |
|        |             |             | alternate |             |          |     |    |    |    |     |     |     |       |       |       |
| 108971 | TruSeqV2    | 2:234656479 | exon      | C/C         | 2.22E-16 | 586 | 99 | 53 | 99 | 0/0 | 0/0 | 0/0 | match | match | match |
|        |             |             | stop      |             |          |     |    |    |    |     |     |     |       |       |       |
|        |             |             | alternate |             |          |     |    |    |    |     |     |     |       |       |       |
| 115239 | TruSeqV2    | 2:234656479 | exon      | C/C         | 4.44E-16 | 586 | 99 | 53 | 99 | 0/0 | 0/0 | 0/0 | match | match | match |
|        |             |             | stop      |             |          |     |    |    |    |     |     |     |       |       |       |
|        |             |             | alternate |             |          |     |    |    |    |     |     |     |       |       |       |
| 132306 | Agilent38MB | 2:234656479 | exon      | C/C         | 2.22E-16 | 586 | 99 | 53 | 99 | 0/0 | 0/0 | 0/0 | match | match | match |
|        |             |             | stop      |             |          |     |    |    |    |     |     |     |       |       |       |
|        |             |             | alternate |             |          |     |    |    |    |     |     |     |       |       |       |
| 163383 | TruSeqV2    | 2:234656479 | exon      | C/C         | 4.44E-16 | 586 | 99 | 53 | 99 | 0/0 | 0/0 | 0/0 | match | match | match |
|        |             |             | stop      |             |          |     |    |    |    |     |     |     |       |       |       |
|        |             |             | alternate |             |          |     |    |    |    |     |     |     |       |       |       |
| 198564 | Agilent38MB | 2:234656479 | exon      | C/C         | 2.22E-16 | 586 | 99 | 53 | 99 | 0/0 | 0/0 | 0/0 | match | match | match |
| 198564 | Agilent38MB | 2:234665659 | promoter  | T/T         | 1.33E-15 | 4   | 12 | 35 | 84 | 0/0 | 0/0 | 0/0 | match | match | match |
| 198564 | Agilent38MB | 2:234665782 | promoter  | G/G         | 6.66E-16 | 3   | 9  | 19 | 45 | 0/0 | 0/0 | 0/0 | match | match | match |
| 198564 | Agilent38MB | 2:234667582 | intronic  | A/A         | 2.00E-14 | 1   | 3  | 41 | 99 | 0/0 | 0/0 | 0/0 | match | match | match |
|        |             |             |           | (TA)5or6/(T |          |     |    |    |    |     |     |     |       |       |       |
| 108971 | TruSeqV2    | 2:234668881 | promoter  | A)5or6      | 4.62E-14 | 47  | 61 | 39 | 48 | 0/0 | 0/0 | 0/0 | match | match | match |
|        |             |             |           | (TA)5or6/(T |          |     |    |    |    |     |     |     |       |       |       |
| 163383 | TruSeqV2    | 2:234668881 | promoter  | A)5or6      | 7.99E-15 | 47  | 61 | 39 | 48 | 0/0 | 0/0 | 0/0 | match | match | match |
|        |             |             |           | (TA)5or6/(T |          |     |    |    |    |     |     |     |       |       |       |
| 198564 | Agilent38MB | 2:234668881 | promoter  | A)5or6      | 1.18E-13 | 47  | 61 | 39 | 48 | 0/0 | 0/0 | 0/0 | match | match | match |
| 108971 | TruSeqV2    | 2:234669144 | missense  | G/G         | 2.22E-16 | 172 | 99 | 43 | 99 | 0/0 | 0/0 | 0/0 | match | match | match |
| 115239 | TruSeqV2    | 2:234669144 | missense  | G/G         | 2.22E-16 | 108 | 99 | 42 | 99 | 0/0 | 0/0 | 0/0 | match | match | match |
| 132306 | Agilent38MB | 2:234669144 | missense  | G/G         | 2.22E-16 | 326 | 99 | 30 | 81 | 0/0 | 0/0 | 0/0 | match | match | match |
| 163383 | TruSeqV2    | 2:234669144 | missense  | G/G         | 2.22E-16 | 137 | 99 | 40 | 99 | 0/0 | 0/0 | 0/0 | match | match | match |
| 198564 | Agilent38MB | 2:234669144 | missense  | G/G         | 2.22E-16 | 694 | 99 | 39 | 99 | 0/0 | 0/0 | 0/0 | match | match | match |

|        |             |             |          |     |          |     |    |    |    |     |     |     |       |       |       |
|--------|-------------|-------------|----------|-----|----------|-----|----|----|----|-----|-----|-----|-------|-------|-------|
| 108971 | TruSeqV2    | 2:234669155 | stop     | C/C | 2.22E-16 | 156 | 99 | 42 | 99 | 0/0 | 0/0 | 0/0 | match | match | match |
| 115239 | TruSeqV2    | 2:234669155 | stop     | C/C | 4.44E-16 | 103 | 99 | 35 | 93 | 0/0 | 0/0 | 0/0 | match | match | match |
| 132306 | Agilent38MB | 2:234669155 | stop     | C/C | 2.22E-16 | 372 | 99 | 31 | 84 | 0/0 | 0/0 | 0/0 | match | match | match |
| 163383 | TruSeqV2    | 2:234669155 | stop     | C/C | 2.22E-16 | 129 | 99 | 42 | 99 | 0/0 | 0/0 | 0/0 | match | match | match |
| 198564 | Agilent38MB | 2:234669155 | stop     | C/C | 6.22E-15 | 787 | 99 | 43 | 99 | 0/0 | 0/0 | 0/0 | match | match | match |
| 108971 | TruSeqV2    | 2:234669180 | missense | T/T | 4.44E-16 | 151 | 99 | 50 | 99 | 0/0 | 0/0 | 0/0 | match | match | match |
| 115239 | TruSeqV2    | 2:234669180 | missense | T/T | 4.44E-16 | 91  | 99 | 38 | 99 | 0/0 | 0/0 | 0/0 | match | match | match |
| 132306 | Agilent38MB | 2:234669180 | missense | T/T | 2.22E-16 | 417 | 99 | 37 | 99 | 0/0 | 0/0 | 0/0 | match | match | match |
| 163383 | TruSeqV2    | 2:234669180 | missense | T/T | 2.22E-16 | 131 | 99 | 38 | 96 | 0/0 | 0/0 | 0/0 | match | match | match |
| 198564 | Agilent38MB | 2:234669180 | missense | T/T | 4.44E-16 | 903 | 99 | 49 | 99 | 0/0 | 0/0 | 0/0 | match | match | match |
| 108971 | TruSeqV2    | 2:234669457 | missense | T/T | 2.89E-15 | 88  | 99 | 37 | 96 | 0/0 | 0/0 | 0/0 | match | match | match |
| 115239 | TruSeqV2    | 2:234669457 | missense | T/T | 4.44E-16 | 37  | 96 | 43 | 99 | 0/0 | 0/0 | 0/0 | match | match | match |
| 132306 | Agilent38MB | 2:234669457 | missense | T/T | 2.66E-15 | 224 | 99 | 24 | 69 | 0/0 | 0/0 | 0/0 | match | match | match |
| 163383 | TruSeqV2    | 2:234669457 | missense | T/T | 1.55E-15 | 51  | 99 | 35 | 87 | 0/0 | 0/0 | 0/0 | match | match | match |
| 198564 | Agilent38MB | 2:234669457 | missense | T/T | 2.22E-15 | 426 | 99 | 40 | 99 | 0/0 | 0/0 | 0/0 | match | match | match |
| 108971 | TruSeqV2    | 2:234669462 | missense | T/T | 2.66E-15 | 89  | 99 | 37 | 99 | 0/0 | 0/0 | 0/0 | match | match | match |
| 115239 | TruSeqV2    | 2:234669462 | missense | T/T | 4.44E-16 | 38  | 99 | 42 | 99 | 0/0 | 0/0 | 0/0 | match | match | match |
| 132306 | Agilent38MB | 2:234669462 | missense | T/T | 1.78E-15 | 227 | 99 | 24 | 66 | 0/0 | 0/0 | 0/0 | match | match | match |
| 163383 | TruSeqV2    | 2:234669462 | missense | T/T | 8.88E-16 | 53  | 99 | 33 | 84 | 0/0 | 0/0 | 0/0 | match | match | match |
| 198564 | Agilent38MB | 2:234669462 | missense | T/T | 1.33E-15 | 401 | 99 | 39 | 99 | 0/0 | 0/0 | 0/0 | match | match | match |
| 108971 | TruSeqV2    | 2:234669558 | missense | C/C | 2.22E-16 | 77  | 99 | 40 | 99 | 0/0 | 0/0 | 0/0 | match | match | match |
| 115239 | TruSeqV2    | 2:234669558 | missense | C/C | 8.88E-16 | 71  | 99 | 40 | 99 | 0/0 | 0/0 | 0/0 | match | match | match |
| 132306 | Agilent38MB | 2:234669558 | missense | C/C | 2.22E-16 | 334 | 99 | 41 | 99 | 0/0 | 0/0 | 0/0 | match | match | match |
| 163383 | TruSeqV2    | 2:234669558 | missense | C/C | 4.44E-16 | 63  | 99 | 45 | 99 | 0/0 | 0/0 | 0/0 | match | match | match |
| 198564 | Agilent38MB | 2:234669558 | missense | C/C | 4.44E-16 | 718 | 99 | 49 | 99 | 0/0 | 0/0 | 0/0 | match | match | match |
| 108971 | TruSeqV2    | 2:234669619 | missense | C/C | 2.22E-16 | 50  | 99 | 34 | 93 | 0/0 | 0/0 | 0/0 | match | match | match |
| 115239 | TruSeqV2    | 2:234669619 | missense | C/C | 2.22E-16 | 41  | 99 | 43 | 99 | 0/0 | 0/0 | 0/0 | match | match | match |
| 132306 | Agilent38MB | 2:234669619 | missense | C/C | 2.22E-16 | 265 | 99 | 38 | 99 | 0/0 | 0/0 | 0/0 | match | match | match |
| 163383 | TruSeqV2    | 2:234669619 | missense | C/C | 2.22E-16 | 41  | 99 | 56 | 99 | 0/0 | 0/0 | 0/0 | match | match | match |
| 198564 | Agilent38MB | 2:234669619 | missense | C/C | 8.88E-16 | 450 | 99 | 45 | 99 | 0/0 | 0/0 | 0/0 | match | match | match |
| 108971 | TruSeqV2    | 2:234669631 | missense | T/T | 2.22E-16 | 46  | 99 | 39 | 99 | 0/0 | 0/0 | 0/0 | match | match | match |
| 115239 | TruSeqV2    | 2:234669631 | missense | T/T | 2.22E-16 | 35  | 96 | 44 | 99 | 0/0 | 0/0 | 0/0 | match | match | match |
| 132306 | Agilent38MB | 2:234669631 | missense | T/T | 2.22E-16 | 281 | 99 | 38 | 99 | 0/0 | 0/0 | 0/0 | match | match | match |
| 163383 | TruSeqV2    | 2:234669631 | missense | T/T | 2.22E-16 | 36  | 87 | 51 | 99 | 0/0 | 0/0 | 0/0 | match | match | match |
| 198564 | Agilent38MB | 2:234669631 | missense | T/T | 2.22E-16 | 439 | 99 | 43 | 99 | 0/0 | 0/0 | 0/0 | match | match | match |
| 108971 | TruSeqV2    | 2:234669759 | missense | G/G | 4.44E-16 | 7   | 18 | 29 | 75 | 0/0 | 0/0 | 0/0 | match | match | match |
| 115239 | TruSeqV2    | 2:234669759 | missense | G/G | 2.22E-16 | 8   | 24 | 43 | 99 | 0/0 | 0/0 | 0/0 | match | match | match |
| 132306 | Agilent38MB | 2:234669759 | missense | G/G | 4.44E-16 | 241 | 99 | 35 | 99 | 0/0 | 0/0 | 0/0 | match | match | match |

|        |             |             |          |     |          |     |    |    |    |     |     |     |       |       |       |
|--------|-------------|-------------|----------|-----|----------|-----|----|----|----|-----|-----|-----|-------|-------|-------|
| 163383 | TruSeqV2    | 2:234669759 | missense | G/G | 4.44E-16 | 12  | 30 | 39 | 99 | 0/0 | 0/0 | 0/0 | match | match | match |
| 198564 | Agilent38MB | 2:234669759 | missense | G/G | 4.44E-16 | 461 | 99 | 36 | 99 | 0/0 | 0/0 | 0/0 | match | match | match |
| 132306 | Agilent38MB | 2:234675738 | missense | G/G | 6.66E-16 | 152 | 99 | 45 | 99 | 0/0 | 0/0 | 0/0 | match | match | match |
| 198564 | Agilent38MB | 2:234675738 | missense | G/G | 6.66E-16 | 272 | 99 | 55 | 99 | 0/0 | 0/0 | 0/0 | match | match | match |
| 132306 | Agilent38MB | 2:234675807 | missense | A/A | 4.44E-16 | 229 | 99 | 40 | 93 | 0/0 | 0/0 | 0/0 | match | match | match |
| 198564 | Agilent38MB | 2:234675807 | missense | A/A | 4.47E-13 | 381 | 99 | 39 | 99 | 0/0 | 0/0 | 0/0 | match | match | match |
| 132306 | Agilent38MB | 2:234676519 | stop     | C/C | 1.78E-15 | 244 | 99 | 44 | 99 | 0/0 | 0/0 | 0/0 | match | match | match |
| 198564 | Agilent38MB | 2:234676519 | stop     | C/C | 4.44E-16 | 455 | 99 | 33 | 87 | 0/0 | 0/0 | 0/0 | match | match | match |
| 132306 | Agilent38MB | 2:234676567 | stop     | C/C | 2.22E-16 | 255 | 99 | 43 | 99 | 0/0 | 0/0 | 0/0 | match | match | match |
| 198564 | Agilent38MB | 2:234676567 | stop     | C/C | 6.44E-14 | 491 | 99 | 25 | 66 | 0/0 | 0/0 | 0/0 | match | match | match |
| 132306 | Agilent38MB | 2:234676568 | missense | A/A | 2.22E-16 | 243 | 99 | 44 | 99 | 0/0 | 0/0 | 0/0 | match | match | match |
| 198564 | Agilent38MB | 2:234676568 | missense | A/A | 3.66E-14 | 477 | 99 | 26 | 66 | 0/0 | 0/0 | 0/0 | match | match | match |
| 132306 | Agilent38MB | 2:234676880 | missense | C/C | 2.22E-16 | 164 | 99 | 36 | 99 | 0/0 | 0/0 | 0/0 | match | match | match |
| 198564 | Agilent38MB | 2:234676880 | missense | C/C | 2.22E-16 | 396 | 99 | 39 | 99 | 0/0 | 0/0 | 0/0 | match | match | match |
| 132306 | Agilent38MB | 2:234676883 | missense | G/G | 2.22E-16 | 183 | 99 | 35 | 87 | 0/0 | 0/0 | 0/0 | match | match | match |
| 198564 | Agilent38MB | 2:234676883 | missense | G/G | 7.77E-15 | 418 | 99 | 40 | 99 | 0/0 | 0/0 | 0/0 | match | match | match |
| 132306 | Agilent38MB | 2:234676905 | missense | C/C | 4.44E-15 | 244 | 99 | 33 | 90 | 0/0 | 0/0 | 0/0 | match | match | match |
| 198564 | Agilent38MB | 2:234676905 | missense | C/C | 4.44E-16 | 554 | 99 | 35 | 81 | 0/0 | 0/0 | 0/0 | match | match | match |
| 132306 | Agilent38MB | 2:234676924 | missense | C/C | 1.78E-15 | 285 | 99 | 30 | 69 | 0/0 | 0/0 | 0/0 | match | match | match |
| 198564 | Agilent38MB | 2:234676924 | missense | C/C | 4.44E-16 | 646 | 99 | 34 | 90 | 0/0 | 0/0 | 0/0 | match | match | match |
| 132306 | Agilent38MB | 2:234676982 | missense | G/G | 2.22E-15 | 208 | 99 | 38 | 99 | 0/0 | 0/0 | 0/0 | match | match | match |
| 198564 | Agilent38MB | 2:234676982 | missense | G/G | 4.49E-14 | 470 | 99 | 35 | 96 | 0/0 | 0/0 | 0/0 | match | match | match |
| 108971 | TruSeqV2    | 2:234680912 | stop     | A/A | 2.22E-16 | 12  | 36 | 48 | 99 | 0/0 | 0/0 | 0/0 | match | match | match |
| 115239 | TruSeqV2    | 2:234680912 | stop     | A/A | 2.22E-16 | 8   | 24 | 36 | 90 | 0/0 | 0/0 | 0/0 | match | match | match |
| 132306 | Agilent38MB | 2:234680912 | stop     | A/A | 2.22E-16 | 37  | 99 | 35 | 90 | 0/0 | 0/0 | 0/0 | match | match | match |
| 163383 | TruSeqV2    | 2:234680912 | stop     | A/A | 2.22E-16 | 8   | 24 | 38 | 99 | 0/0 | 0/0 | 0/0 | match | match | match |
| 198564 | Agilent38MB | 2:234680912 | stop     | A/A | 3.26E-14 | 107 | 99 | 51 | 99 | 0/0 | 0/0 | 0/0 | match | match | match |
| 108971 | TruSeqV2    | 2:234681031 | synon    | C/C | 3.75E-14 | 23  | 63 | 25 | 69 | 0/0 | 0/0 | 0/0 | match | match | match |
| 115239 | TruSeqV2    | 2:234681031 | synon    | C/C | 6.66E-16 | 10  | 27 | 25 | 66 | 0/0 | 0/0 | 0/0 | match | match | match |
| 132306 | Agilent38MB | 2:234681031 | synon    | C/C | 1.11E-15 | 233 | 99 | 33 | 78 | 0/0 | 0/0 | 0/0 | match | match | match |
| 163383 | TruSeqV2    | 2:234681031 | synon    | C/C | 1.78E-15 | 15  | 42 | 26 | 72 | 0/0 | 0/0 | 0/0 | match | match | match |
| 198564 | Agilent38MB | 2:234681031 | synon    | C/C | 5.13E-14 | 472 | 99 | 36 | 87 | 0/0 | 0/0 | 0/0 | match | match | match |
| 108971 | TruSeqV2    | 2:234681090 | stop     | T/T | 4.71E-14 | 20  | 48 | 40 | 99 | 0/0 | 0/0 | 0/0 | match | match | match |
| 115239 | TruSeqV2    | 2:234681090 | stop     | T/T | 2.22E-15 | 9   | 21 | 26 | 63 | 0/0 | 0/0 | 0/0 | match | match | match |

|        |             |             |          |     |          |     |    |    |    |     |     |     |       |       |       |
|--------|-------------|-------------|----------|-----|----------|-----|----|----|----|-----|-----|-----|-------|-------|-------|
| 132306 | Agilent38MB | 2:234681090 | stop     | T/T | 5.66E-14 | 317 | 99 | 36 | 96 | 0/0 | 0/0 | 0/0 | match | match | match |
| 163383 | TruSeqV2    | 2:234681090 | stop     | T/T | 2.80E-14 | 11  | 24 | 32 | 84 | 0/0 | 0/0 | 0/0 | match | match | match |
| 198564 | Agilent38MB | 2:234681090 | stop     | T/T | 1.31E-14 | 541 | 99 | 32 | 81 | 0/0 | 0/0 | 0/0 | match | match | match |
| 108971 | TruSeqV2    | 2:234681134 | missense | G/G | 4.44E-16 | 14  | 27 | 43 | 99 | 0/0 | 0/0 | 0/0 | match | match | match |
| 115239 | TruSeqV2    | 2:234681134 | missense | G/G | 2.00E-15 | 6   | 15 | 20 | 42 | 0/0 | 0/0 | 0/0 | match | match | match |
| 132306 | Agilent38MB | 2:234681134 | missense | G/G | 3.86E-14 | 146 | 99 | 36 | 87 | 0/0 | 0/0 | 0/0 | match | match | match |
| 163383 | TruSeqV2    | 2:234681134 | missense | G/G | 2.46E-14 | 9   | 27 | 32 | 75 | 0/0 | 0/0 | 0/0 | match | match | match |
| 198564 | Agilent38MB | 2:234681134 | missense | G/G | 2.00E-15 | 250 | 99 | 43 | 99 | 0/0 | 0/0 | 0/0 | match | match | match |
| 198564 | Agilent38MB | 2:234681645 | 3'UTR    | C/C | 3.11E-15 | 2   | 6  | 55 | 99 | 1/1 | 1/1 | 1/1 | match | match | match |
| 108971 | TruSeqV2    | 2:27422605  | 3'UTR    | T/T | 4.44E-16 | 125 | 99 | 28 | 84 | 1/1 | 1/1 | 1/1 | match | match | match |
| 115239 | TruSeqV2    | 2:27422605  | 3'UTR    | T/T | 2.22E-16 | 87  | 99 | 31 | 93 | 1/1 | 1/1 | 1/1 | match | match | match |
| 132306 | Agilent38MB | 2:27422605  | 3'UTR    | T/T | 2.22E-16 | 1   | 3  | 39 | 99 | 1/1 | 1/1 | 1/1 | match | match | match |
| 163383 | TruSeqV2    | 2:27422605  | 3'UTR    | T/C | 8.88E-16 | 106 | 99 | 29 | 99 | 0/1 | 0/1 | 0/1 | match | match | match |
| 108971 | TruSeqV2    | 2:27424603  | missense | C/C | 1.33E-15 | 380 | 99 | 42 | 99 | 0/0 | 0/0 | 0/0 | match | match | match |
| 115239 | TruSeqV2    | 2:27424603  | missense | C/C | 1.33E-15 | 266 | 99 | 23 | 53 | 0/0 | 0/0 | 0/0 | match | match | match |
| 132306 | Agilent38MB | 2:27424603  | missense | C/C | 2.22E-16 | 16  | 42 | 28 | 69 | 0/0 | 0/0 | 0/0 | match | match | match |
| 163383 | TruSeqV2    | 2:27424603  | missense | C/C | 2.22E-16 | 280 | 99 | 43 | 99 | 0/0 | 0/0 | 0/0 | match | match | match |
| 198564 | Agilent38MB | 2:27424603  | missense | C/C | 1.89E-14 | 19  | 57 | 51 | 99 | 0/0 | 0/0 | 0/0 | match | match | match |
| 108971 | TruSeqV2    | 2:27424636  | missense | A/A | 1.30E-11 | 292 | 99 | 27 | 81 | 1/1 | 1/1 | 1/1 | match | match | match |
| 132306 | Agilent38MB | 2:27424636  | missense | A/A | 1.33E-15 | 27  | 81 | 21 | 63 | 1/1 | 1/1 | 1/1 | match | match | match |
| 163383 | TruSeqV2    | 2:27424636  | missense | G/A | 1.11E-15 | 226 | 99 | 31 | 99 | 0/1 | 0/1 | 0/1 | match | match | match |

|        |             |            |          |     |          |     |    |    |    |     |     |     |       |       |       |
|--------|-------------|------------|----------|-----|----------|-----|----|----|----|-----|-----|-----|-------|-------|-------|
| 198564 | Agilent38MB | 2:27424636 | missense | G/A | 4.00E-15 | 38  | 99 | 37 | 99 | 0/1 | 0/1 | 0/1 | match | match | match |
| 108971 | TruSeqV2    | 2:27424892 | synon    | G/G | 2.22E-16 | 166 | 99 | 50 | 99 | 0/0 | 0/0 | 0/0 | match | match | match |
| 115239 | TruSeqV2    | 2:27424892 | synon    | G/G | 4.44E-16 | 98  | 99 | 28 | 78 | 0/0 | 0/0 | 0/0 | match | match | match |
| 132306 | Agilent38MB | 2:27424892 | synon    | G/G | 2.22E-16 | 105 | 99 | 28 | 75 | 0/0 | 0/0 | 0/0 | match | match | match |
| 163383 | TruSeqV2    | 2:27424892 | synon    | G/G | 2.22E-16 | 153 | 99 | 49 | 99 | 0/0 | 0/0 | 0/0 | match | match | match |
| 198564 | Agilent38MB | 2:27424892 | synon    | G/G | 3.77E-15 | 227 | 99 | 31 | 84 | 0/0 | 0/0 | 0/0 | match | match | match |
| 108971 | TruSeqV2    | 2:27427402 | missense | A/A | 1.52E-13 | 291 | 99 | 44 | 99 | 0/0 | 0/0 | 0/0 | match | match | match |
| 115239 | TruSeqV2    | 2:27427402 | missense | A/A | 1.78E-15 | 194 | 99 | 21 | 54 | 0/0 | 0/0 | 0/0 | match | match | match |
| 132306 | Agilent38MB | 2:27427402 | missense | A/A | 6.66E-16 | 53  | 99 | 46 | 99 | 0/0 | 0/0 | 0/0 | match | match | match |
| 163383 | TruSeqV2    | 2:27427402 | missense | A/A | 9.10E-15 | 208 | 99 | 41 | 99 | 0/0 | 0/0 | 0/0 | match | match | match |
| 198564 | Agilent38MB | 2:27427402 | missense | A/A | 7.99E-15 | 95  | 99 | 47 | 99 | 0/0 | 0/0 | 0/0 | match | match | match |
| 108971 | TruSeqV2    | 2:27428295 | synon    | G/G | 2.22E-16 | 112 | 99 | 28 | 84 | 1/1 | 1/1 | 1/1 | match | match | match |
| 115239 | TruSeqV2    | 2:27428295 | synon    | G/G | 4.44E-16 | 80  | 99 | 19 | 57 | 1/1 | 1/1 | 1/1 | match | match | match |
| 132306 | Agilent38MB | 2:27428295 | synon    | G/G | 2.22E-16 | 138 | 99 | 35 | 99 | 1/1 | 1/1 | 1/1 | match | match | match |
| 163383 | TruSeqV2    | 2:27428295 | synon    | G/G | 6.66E-16 | 83  | 99 | 37 | 99 | 1/1 | 1/1 | 1/1 | match | match | match |
| 198564 | Agilent38MB | 2:27428295 | synon    | G/G | 2.22E-16 | 266 | 99 | 31 | 91 | 1/1 | 1/1 | 1/1 | match | match | match |
| 108971 | TruSeqV2    | 2:27430237 | synon    | T/T | 2.22E-16 | 318 | 99 | 42 | 99 | 0/0 | 0/0 | 0/0 | match | match | match |
| 115239 | TruSeqV2    | 2:27430237 | synon    | T/T | 7.77E-15 | 218 | 99 | 22 | 51 | 0/0 | 0/0 | 0/0 | match | match | match |
| 132306 | Agilent38MB | 2:27430237 | synon    | T/T | 2.22E-16 | 73  | 99 | 23 | 58 | 0/0 | 0/0 | 0/0 | match | match | match |
| 163383 | TruSeqV2    | 2:27430237 | synon    | T/C | 4.88E-15 | 209 | 99 | 22 | 99 | 0/1 | 0/1 | 0/1 | match | match | match |
| 198564 | Agilent38MB | 2:27430237 | synon    | T/T | 2.22E-15 | 109 | 99 | 47 | 99 | 0/0 | 0/0 | 0/0 | match | match | match |
| 108971 | TruSeqV2    | 2:31558873 | missense | C/C | 2.22E-16 | 44  | 99 | 40 | 87 | 0/0 | 0/0 | 0/0 | match | match | match |
| 115239 | TruSeqV2    | 2:31558873 | missense | C/C | 2.22E-16 | 26  | 60 | 47 | 99 | 0/0 | 0/0 | 0/0 | match | match | match |

|        |             |            |          |     |          |     |    |    |    |     |     |     |       |       |       |
|--------|-------------|------------|----------|-----|----------|-----|----|----|----|-----|-----|-----|-------|-------|-------|
| 132306 | Agilent38MB | 2:31558873 | missense | C/C | 4.44E-16 | 246 | 99 | 34 | 90 | 0/0 | 0/0 | 0/0 | match | match | match |
| 163383 | TruSeqV2    | 2:31558873 | missense | C/C | 2.22E-16 | 56  | 99 | 36 | 99 | 0/0 | 0/0 | 0/0 | match | match | match |
| 198564 | Agilent38MB | 2:31558873 | missense | C/C | 2.22E-16 | 474 | 99 | 43 | 99 | 0/0 | 0/0 | 0/0 | match | match | match |
| 108971 | TruSeqV2    | 2:31562412 | synon    | T/C | 5.11E-15 | 129 | 99 | 39 | 99 | 0/1 | 0/1 | 0/1 | match | match | match |
| 115239 | TruSeqV2    | 2:31562412 | synon    | C/C | 3.11E-15 | 87  | 99 | 32 | 82 | 0/0 | 0/0 | 0/0 | match | match | match |
| 132306 | Agilent38MB | 2:31562412 | synon    | C/C | 4.44E-16 | 211 | 99 | 29 | 81 | 0/0 | 0/0 | 0/0 | match | match | match |
| 163383 | TruSeqV2    | 2:31562412 | synon    | C/C | 3.11E-15 | 83  | 99 | 33 | 96 | 0/0 | 0/0 | 0/0 | match | match | match |
| 198564 | Agilent38MB | 2:31562412 | synon    | C/C | 4.22E-15 | 361 | 99 | 50 | 99 | 0/0 | 0/0 | 0/0 | match | match | match |
| 108971 | TruSeqV2    | 2:31565119 | missense | G/G | 2.22E-16 | 205 | 99 | 48 | 99 | 0/0 | 0/0 | 0/0 | match | match | match |
| 115239 | TruSeqV2    | 2:31565119 | missense | G/G | 6.66E-16 | 159 | 99 | 37 | 99 | 0/0 | 0/0 | 0/0 | match | match | match |
| 132306 | Agilent38MB | 2:31565119 | missense | G/G | 4.44E-16 | 236 | 99 | 49 | 99 | 0/0 | 0/0 | 0/0 | match | match | match |
| 163383 | TruSeqV2    | 2:31565119 | missense | G/G | 4.44E-16 | 201 | 99 | 35 | 99 | 0/0 | 0/0 | 0/0 | match | match | match |
| 198564 | Agilent38MB | 2:31565119 | missense | G/G | 4.44E-16 | 381 | 99 | 61 | 99 | 0/0 | 0/0 | 0/0 | match | match | match |
| 108971 | TruSeqV2    | 2:31571786 | synon    | G/G | 6.66E-16 | 115 | 99 | 58 | 99 | 1/1 | 1/1 | 1/1 | match | match | match |
| 115239 | TruSeqV2    | 2:31571786 | synon    | G/G | 6.66E-16 | 88  | 99 | 36 | 65 | 1/1 | 1/1 | 1/1 | match | match | match |
| 132306 | Agilent38MB | 2:31571786 | synon    | G/G | 4.44E-16 | 37  | 99 | 37 | 99 | 1/1 | 1/1 | 1/1 | match | match | match |
| 163383 | TruSeqV2    | 2:31571786 | synon    | G/A | 2.22E-15 | 121 | 99 | 43 | 99 | 0/1 | 0/1 | 0/1 | match | match | match |
| 198564 | Agilent38MB | 2:31571786 | synon    | G/A | 2.78E-14 | 72  | 99 | 57 | 99 | 0/1 | 0/1 | 0/1 | match | match | match |
| 108971 | TruSeqV2    | 2:31572992 | missense | G/G | 2.22E-16 | 165 | 99 | 24 | 71 | 0/0 | 0/0 | 0/0 | match | match | match |
| 115239 | TruSeqV2    | 2:31572992 | missense | G/G | 4.44E-16 | 124 | 99 | 15 | 33 | 0/0 | 0/0 | 0/0 | match | match | match |
| 132306 | Agilent38MB | 2:31572992 | missense | G/G | 2.22E-16 | 29  | 69 | 31 | 93 | 0/0 | 0/0 | 0/0 | match | match | match |
| 163383 | TruSeqV2    | 2:31572992 | missense | G/G | 2.22E-16 | 154 | 99 | 24 | 60 | 0/0 | 0/0 | 0/0 | match | match | match |



|        |             |            |           |     |          |     |    |    |    |     |     |     |       |       |       |
|--------|-------------|------------|-----------|-----|----------|-----|----|----|----|-----|-----|-----|-------|-------|-------|
| 198564 | Agilent38MB | 2:31572992 | missense  | G/G | 4.44E-16 | 47  | 99 | 33 | 81 | 0/0 | 0/0 | 0/0 | match | match | match |
| 108971 | TruSeqV2    | 2:31572994 | missense  | G/G | 2.22E-16 | 167 | 99 | 25 | 39 | 0/0 | 0/0 | 0/0 | match | match | match |
| 115239 | TruSeqV2    | 2:31572994 | missense  | G/G | 4.44E-16 | 125 | 99 | 14 | 33 | 0/0 | 0/0 | 0/0 | match | match | match |
| 132306 | Agilent38MB | 2:31572994 | missense  | G/G | 2.22E-16 | 30  | 72 | 34 | 96 | 0/0 | 0/0 | 0/0 | match | match | match |
| 163383 | TruSeqV2    | 2:31572994 | missense  | G/G | 2.22E-16 | 153 | 99 | 22 | 63 | 0/0 | 0/0 | 0/0 | match | match | match |
| 198564 | Agilent38MB | 2:31572994 | missense  | G/G | 2.00E-15 | 50  | 99 | 33 | 84 | 0/0 | 0/0 | 0/0 | match | match | match |
| 108971 | TruSeqV2    | 2:31589847 | synon     | G/G | 3.33E-15 | 134 | 99 | 45 | 99 | 0/0 | 0/0 | 0/0 | match | match | match |
| 115239 | TruSeqV2    | 2:31589847 | synon     | G/A | 1.55E-15 | 115 | 99 | 33 | 99 | 0/1 | 0/1 | 0/1 | match | match | match |
| 132306 | Agilent38MB | 2:31589847 | synon     | G/A | 1.84E-14 | 11  | 99 | 49 | 99 | 0/1 | 0/1 | 0/1 | match | match | match |
| 163383 | TruSeqV2    | 2:31589847 | synon     | G/G | 1.11E-15 | 124 | 99 | 42 | 99 | 0/0 | 0/0 | 0/0 | match | match | match |
| 198564 | Agilent38MB | 2:31589847 | synon     | G/G | 8.22E-15 | 24  | 63 | 39 | 99 | 0/0 | 0/0 | 0/0 | match | match | match |
| 108971 | TruSeqV2    | 2:31606670 | synon     | G/G | 1.55E-15 | 151 | 99 | 39 | 90 | 0/0 | 0/0 | 0/0 | match | match | match |
| 115239 | TruSeqV2    | 2:31606670 | synon     | G/G | 4.44E-16 | 123 | 99 | 26 | 75 | 0/0 | 0/0 | 0/0 | match | match | match |
| 132306 | Agilent38MB | 2:31606670 | synon     | G/G | 4.44E-16 | 108 | 99 | 19 | 57 | 0/0 | 0/0 | 0/0 | match | match | match |
| 163383 | TruSeqV2    | 2:31606670 | synon     | G/G | 2.22E-16 | 106 | 99 | 22 | 60 | 0/0 | 0/0 | 0/0 | match | match | match |
| 198564 | Agilent38MB | 2:31606670 | synon     | G/G | 1.55E-15 | 239 | 99 | 30 | 84 | 0/0 | 0/0 | 0/0 | match | match | match |
| 108971 | TruSeqV2    | 2:38297881 | stop/miss | A/A | 1.49E-14 | 175 | 99 | 33 | 83 | 0/0 | 0/0 | 0/0 | match | match | match |
| 115239 | TruSeqV2    | 2:38297881 | stop/miss | A/A | 2.47E-12 | 175 | 99 | 33 | 83 | 0/0 | 0/0 | 0/0 | match | match | match |
| 132306 | Agilent38MB | 2:38297881 | stop/miss | A/A | 4.97E-14 | 175 | 99 | 33 | 83 | 0/0 | 0/0 | 0/0 | match | match | match |
| 163383 | TruSeqV2    | 2:38297881 | stop/miss | A/A | 9.77E-15 | 175 | 99 | 33 | 83 | 0/0 | 0/0 | 0/0 | match | match | match |
| 198564 | Agilent38MB | 2:38297881 | stop/miss | A/A | 4.44E-16 | 175 | 99 | 33 | 83 | 0/0 | 0/0 | 0/0 | match | match | match |

|        |             |            |    |                                                                                 |          |     |    |    |    |     |     |     |       |       |       |
|--------|-------------|------------|----|---------------------------------------------------------------------------------|----------|-----|----|----|----|-----|-----|-----|-------|-------|-------|
| 108971 | TruSeqV2    | 2:38298070 | fs | GGCGGTG<br>CATTGGC<br>GAAGAAC<br>TTTC/GGC<br>GGTGCAT<br>TGGCGAA<br>GAACTTT<br>C | 6.66E-16 | 221 | 99 | 43 | 99 | 0/0 | 0/0 | 0/0 | match | match | match |
| 115239 | TruSeqV2    | 2:38298070 | fs | GGCGGTG<br>CATTGGC<br>GAAGAAC<br>TTTC/GGC<br>GGTGCAT<br>TGGCGAA<br>GAACTTT<br>C | 8.88E-16 | 221 | 99 | 43 | 99 | 0/0 | 0/0 | 0/0 | match | match | match |
| 132306 | Agilent38MB | 2:38298070 | fs | GGCGGTG<br>CATTGGC<br>GAAGAAC<br>TTTC/GGC<br>GGTGCAT<br>TGGCGAA<br>GAACTTT<br>C | 5.11E-15 | 221 | 99 | 43 | 99 | 0/0 | 0/0 | 0/0 | match | match | match |
| 163383 | TruSeqV2    | 2:38298070 | fs | GGCGGTG<br>CATTGGC<br>GAAGAAC<br>TTTC/GGC<br>GGTGCAT<br>TGGCGAA<br>GAACTTT<br>C | 2.44E-15 | 221 | 99 | 43 | 99 | 0/0 | 0/0 | 0/0 | match | match | match |

GGCGGTG  
 CATTGGC  
 GAAGAAC  
 TTTC/GGC  
 GGTGCAT  
 TGGCGAA  
 GAACTTT

|        |             |            |                    |     |          |     |    |    |    |     |     |     |       |       |       |
|--------|-------------|------------|--------------------|-----|----------|-----|----|----|----|-----|-----|-----|-------|-------|-------|
| 198564 | Agilent38MB | 2:38298070 | fs                 | C   | 8.88E-16 | 221 | 99 | 43 | 99 | 0/0 | 0/0 | 0/0 | match | match | match |
| 108971 | TruSeqV2    | 2:38298092 | missense           | G/G | 8.88E-16 | 227 | 99 | 28 | 72 | 0/0 | 0/0 | 0/0 | match | match | match |
| 115239 | TruSeqV2    | 2:38298092 | missense           | G/G | 2.22E-16 | 165 | 99 | 37 | 93 | 0/0 | 0/0 | 0/0 | match | match | match |
| 132306 | Agilent38MB | 2:38298092 | missense           | G/G | 1.55E-15 | 87  | 99 | 35 | 99 | 0/0 | 0/0 | 0/0 | match | match | match |
| 163383 | TruSeqV2    | 2:38298092 | missense           | G/G | 8.88E-16 | 197 | 99 | 41 | 99 | 0/0 | 0/0 | 0/0 | match | match | match |
| 198564 | Agilent38MB | 2:38298092 | missense           | G/G | 4.44E-16 | 143 | 99 | 42 | 99 | 0/0 | 0/0 | 0/0 | match | match | match |
| 108971 | TruSeqV2    | 2:38298105 | synon              | T/T | 2.22E-16 | 252 | 99 | 31 | 87 | 0/0 | 0/0 | 0/0 | match | match | match |
| 115239 | TruSeqV2    | 2:38298105 | synon              | T/T | 2.22E-16 | 168 | 99 | 36 | 99 | 0/0 | 0/0 | 0/0 | match | match | match |
| 132306 | Agilent38MB | 2:38298105 | synon              | T/T | 6.66E-16 | 83  | 99 | 37 | 96 | 0/0 | 0/0 | 0/0 | match | match | match |
| 163383 | TruSeqV2    | 2:38298105 | synon              | T/T | 6.66E-16 | 204 | 99 | 39 | 99 | 0/0 | 0/0 | 0/0 | match | match | match |
| 198564 | Agilent38MB | 2:38298105 | synon              | T/T | 1.11E-15 | 153 | 99 | 46 | 99 | 0/0 | 0/0 | 0/0 | match | match | match |
| 108971 | TruSeqV2    | 2:38298139 | missense           | T/T | 8.88E-16 | 280 | 99 | 34 | 96 | 0/0 | 0/0 | 0/0 | match | match | match |
| 115239 | TruSeqV2    | 2:38298139 | missense           | T/C | 5.14E-08 | 173 | 99 | 40 | 99 | 0/1 | 0/1 | 0/1 | match | match | match |
| 163383 | TruSeqV2    | 2:38298139 | missense           | T/T | 2.66E-15 | 220 | 99 | 44 | 99 | 0/0 | 0/0 | 0/0 | match | match | match |
| 198564 | Agilent38MB | 2:38298139 | missense           | T/T | 8.88E-16 | 196 | 99 | 50 | 99 | 0/0 | 0/0 | 0/0 | match | match | match |
| 108971 | TruSeqV2    | 2:38298150 | missense/<br>synon | G/A | 1.64E-12 | 286 | 99 | 39 | 99 | 0/1 | 0/1 | 0/1 | match | match | match |
| 115239 | TruSeqV2    | 2:38298150 | missense/<br>synon | G/G | 5.33E-15 | 162 | 99 | 39 | 30 | 1/1 | 1/1 | 1/1 | match | match | match |
| 132306 | Agilent38MB | 2:38298150 | missense/<br>synon | G/G | 1.42E-14 | 82  | 99 | 40 | 99 | 1/1 | 1/1 | 1/1 | match | match | match |
| 163383 | TruSeqV2    | 2:38298150 | missense/<br>synon | G/G | 1.33E-15 | 210 | 99 | 46 | 99 | 1/1 | 1/1 | 1/1 | match | match | match |
| 198564 | Agilent38MB | 2:38298150 | synon              | G/G | 1.55E-15 | 203 | 99 | 51 | 99 | 1/1 | 1/1 | 1/1 | match | match | match |
| 108971 | TruSeqV2    | 2:38298152 | fs                 | G/G | 1.93E-14 | 292 | 99 | 41 | 99 | 0/0 | 0/0 | 0/0 | match | match | match |
| 115239 | TruSeqV2    | 2:38298152 | fs                 | G/G | 4.44E-16 | 292 | 99 | 41 | 99 | 0/0 | 0/0 | 0/0 | match | match | match |
| 132306 | Agilent38MB | 2:38298152 | fs                 | G/G | 4.44E-16 | 292 | 99 | 41 | 99 | 0/0 | 0/0 | 0/0 | match | match | match |
| 163383 | TruSeqV2    | 2:38298152 | fs                 | G/G | 1.55E-15 | 292 | 99 | 41 | 99 | 0/0 | 0/0 | 0/0 | match | match | match |
| 198564 | Agilent38MB | 2:38298152 | fs                 | G/G | 3.55E-15 | 292 | 99 | 41 | 99 | 0/0 | 0/0 | 0/0 | match | match | match |
| 108971 | TruSeqV2    | 2:38298169 | missense           | G/G | 2.66E-15 | 280 | 99 | 41 | 99 | 0/0 | 0/0 | 0/0 | match | match | match |

|        |             |            |          |          |          |     |    |    |    |     |     |     |       |       |       |
|--------|-------------|------------|----------|----------|----------|-----|----|----|----|-----|-----|-----|-------|-------|-------|
| 115239 | TruSeqV2    | 2:38298169 | missense | G/G      | 1.33E-15 | 163 | 99 | 41 | 99 | 0/0 | 0/0 | 0/0 | match | match | match |
| 132306 | Agilent38MB | 2:38298169 | missense | G/G      | 1.49E-14 | 97  | 99 | 46 | 99 | 0/0 | 0/0 | 0/0 | match | match | match |
| 163383 | TruSeqV2    | 2:38298169 | missense | G/G      | 4.44E-16 | 200 | 99 | 43 | 99 | 0/0 | 0/0 | 0/0 | match | match | match |
| 198564 | Agilent38MB | 2:38298169 | missense | G/G      | 8.88E-16 | 190 | 99 | 50 | 99 | 0/0 | 0/0 | 0/0 | match | match | match |
| 108971 | TruSeqV2    | 2:38298187 | missense | G/G      | 1.55E-15 | 275 | 99 | 44 | 99 | 0/0 | 0/0 | 0/0 | match | match | match |
| 115239 | TruSeqV2    | 2:38298187 | missense | G/G      | 5.64E-14 | 156 | 99 | 43 | 99 | 0/0 | 0/0 | 0/0 | match | match | match |
| 132306 | Agilent38MB | 2:38298187 | missense | G/G      | 2.07E-14 | 89  | 99 | 37 | 99 | 0/0 | 0/0 | 0/0 | match | match | match |
| 163383 | TruSeqV2    | 2:38298187 | missense | G/G      | 8.93E-13 | 192 | 99 | 42 | 99 | 0/0 | 0/0 | 0/0 | match | match | match |
| 198564 | Agilent38MB | 2:38298187 | missense | G/G      | 2.28E-13 | 175 | 99 | 41 | 99 | 0/0 | 0/0 | 0/0 | match | match | match |
| 108971 | TruSeqV2    | 2:38298203 | missense | G/C      | 8.31E-10 | 261 | 99 | 39 | 99 | 0/1 | 0/1 | 0/1 | match | match | match |
| 132306 | Agilent38MB | 2:38298203 | missense | G/G      | 8.88E-16 | 76  | 99 | 38 | 99 | 1/1 | 1/1 | 1/1 | match | match | match |
| 163383 | TruSeqV2    | 2:38298203 | missense | G/G      | 1.33E-15 | 195 | 99 | 36 | 99 | 1/1 | 1/1 | 1/1 | match | match | match |
| 198564 | Agilent38MB | 2:38298203 | missense | G/G      | 1.55E-15 | 133 | 99 | 38 | 99 | 1/1 | 1/1 | 1/1 | match | match | match |
|        |             |            |          | TCATGCC  |          |     |    |    |    |     |     |     |       |       |       |
|        |             |            |          | ACC/TCAT |          |     |    |    |    |     |     |     |       |       |       |
| 108971 | TruSeqV2    | 2:38298288 | fs       | GCCACC   | 4.44E-16 | 315 | 99 | 38 | 99 | 0/0 | 0/0 | 0/0 | match | match | match |
|        |             |            |          | TCATGCC  |          |     |    |    |    |     |     |     |       |       |       |
|        |             |            |          | ACC/TCAT |          |     |    |    |    |     |     |     |       |       |       |
| 115239 | TruSeqV2    | 2:38298288 | fs       | GCCACC   | 2.22E-16 | 315 | 99 | 38 | 99 | 0/0 | 0/0 | 0/0 | match | match | match |
|        |             |            |          | TCATGCC  |          |     |    |    |    |     |     |     |       |       |       |
|        |             |            |          | ACC/TCAT |          |     |    |    |    |     |     |     |       |       |       |
| 132306 | Agilent38MB | 2:38298288 | fs       | GCCACC   | 4.44E-16 | 315 | 99 | 38 | 99 | 0/0 | 0/0 | 0/0 | match | match | match |
|        |             |            |          | TCATGCC  |          |     |    |    |    |     |     |     |       |       |       |
|        |             |            |          | ACC/TCAT |          |     |    |    |    |     |     |     |       |       |       |
| 163383 | TruSeqV2    | 2:38298288 | fs       | GCCACC   | 2.22E-16 | 315 | 99 | 38 | 99 | 0/0 | 0/0 | 0/0 | match | match | match |
|        |             |            |          | TCATGCC  |          |     |    |    |    |     |     |     |       |       |       |
|        |             |            |          | ACC/TCAT |          |     |    |    |    |     |     |     |       |       |       |
| 198564 | Agilent38MB | 2:38298288 | fs       | GCCACC   | 2.22E-16 | 315 | 99 | 38 | 99 | 0/0 | 0/0 | 0/0 | match | match | match |
| 108971 | TruSeqV2    | 2:38298328 | missense | C/C      | 9.28E-12 | 322 | 99 | 39 | 99 | 0/0 | 0/0 | 0/0 | match | match | match |
| 115239 | TruSeqV2    | 2:38298328 | missense | C/C      | 2.91E-13 | 221 | 99 | 31 | 81 | 0/0 | 0/0 | 0/0 | match | match | match |
| 132306 | Agilent38MB | 2:38298328 | missense | C/C      | 3.44E-13 | 63  | 99 | 37 | 90 | 0/0 | 0/0 | 0/0 | match | match | match |
| 163383 | TruSeqV2    | 2:38298328 | missense | C/C      | 5.28E-14 | 269 | 99 | 34 | 93 | 0/0 | 0/0 | 0/0 | match | match | match |
| 198564 | Agilent38MB | 2:38298328 | missense | C/C      | 4.04E-13 | 112 | 99 | 31 | 75 | 0/0 | 0/0 | 0/0 | match | match | match |
| 108971 | TruSeqV2    | 2:38298338 | missense | C/C      | 1.03E-10 | 310 | 99 | 39 | 99 | 0/0 | 0/0 | 0/0 | match | match | match |
| 115239 | TruSeqV2    | 2:38298338 | missense | C/C      | 1.14E-13 | 217 | 99 | 30 | 84 | 0/0 | 0/0 | 0/0 | match | match | match |
| 132306 | Agilent38MB | 2:38298338 | missense | C/C      | 7.15E-14 | 62  | 99 | 33 | 87 | 0/0 | 0/0 | 0/0 | match | match | match |
| 163383 | TruSeqV2    | 2:38298338 | missense | C/C      | 6.82E-14 | 256 | 99 | 34 | 96 | 0/0 | 0/0 | 0/0 | match | match | match |
| 198564 | Agilent38MB | 2:38298338 | missense | C/C      | 8.21E-13 | 112 | 99 | 34 | 93 | 0/0 | 0/0 | 0/0 | match | match | match |

|        |             |            |          |         |          |     |    |    |    |     |     |     |       |       |       |
|--------|-------------|------------|----------|---------|----------|-----|----|----|----|-----|-----|-----|-------|-------|-------|
| 108971 | TruSeqV2    | 2:38298361 | missense | G/G     | 2.24E-14 | 256 | 99 | 42 | 99 | 0/0 | 0/0 | 0/0 | match | match | match |
| 115239 | TruSeqV2    | 2:38298361 | missense | G/G     | 8.88E-16 | 209 | 99 | 26 | 63 | 0/0 | 0/0 | 0/0 | match | match | match |
| 132306 | Agilent38MB | 2:38298361 | missense | G/G     | 6.66E-16 | 70  | 99 | 31 | 66 | 0/0 | 0/0 | 0/0 | match | match | match |
| 163383 | TruSeqV2    | 2:38298361 | missense | G/G     | 1.33E-15 | 218 | 99 | 36 | 90 | 0/0 | 0/0 | 0/0 | match | match | match |
| 198564 | Agilent38MB | 2:38298361 | missense | G/G     | 2.22E-16 | 122 | 99 | 33 | 93 | 0/0 | 0/0 | 0/0 | match | match | match |
| 108971 | TruSeqV2    | 2:38298383 | missense | T/T     | 8.88E-16 | 228 | 99 | 35 | 84 | 0/0 | 0/0 | 0/0 | match | match | match |
| 115239 | TruSeqV2    | 2:38298383 | missense | T/T     | 4.44E-16 | 179 | 99 | 29 | 78 | 0/0 | 0/0 | 0/0 | match | match | match |
| 132306 | Agilent38MB | 2:38298383 | missense | T/T     | 4.44E-16 | 59  | 99 | 26 | 66 | 0/0 | 0/0 | 0/0 | match | match | match |
| 163383 | TruSeqV2    | 2:38298383 | missense | T/T     | 2.22E-16 | 197 | 99 | 31 | 78 | 0/0 | 0/0 | 0/0 | match | match | match |
| 198564 | Agilent38MB | 2:38298383 | missense | T/T     | 7.33E-15 | 122 | 99 | 31 | 71 | 0/0 | 0/0 | 0/0 | match | match | match |
| 108971 | TruSeqV2    | 2:38298404 | missense | C/C     | 4.44E-16 | 206 | 99 | 32 | 78 | 0/0 | 0/0 | 0/0 | match | match | match |
| 115239 | TruSeqV2    | 2:38298404 | missense | C/C     | 2.22E-16 | 150 | 99 | 34 | 87 | 0/0 | 0/0 | 0/0 | match | match | match |
| 132306 | Agilent38MB | 2:38298404 | missense | C/C     | 2.22E-16 | 65  | 99 | 31 | 87 | 0/0 | 0/0 | 0/0 | match | match | match |
| 163383 | TruSeqV2    | 2:38298404 | missense | C/C     | 4.44E-16 | 163 | 99 | 31 | 87 | 0/0 | 0/0 | 0/0 | match | match | match |
| 198564 | Agilent38MB | 2:38298404 | missense | C/C     | 2.22E-16 | 119 | 99 | 31 | 81 | 0/0 | 0/0 | 0/0 | match | match | match |
|        |             |            |          | GAGTGCA |          |     |    |    |    |     |     |     |       |       |       |
|        |             |            |          | GGCAGA/ |          |     |    |    |    |     |     |     |       |       |       |
|        |             |            |          | GAGTGCA |          |     |    |    |    |     |     |     |       |       |       |
| 108971 | TruSeqV2    | 2:38298421 | fs       | GGCAGA  | 1.03E-12 | 186 | 99 | 31 | 87 | 0/0 | 0/0 | 0/0 | match | match | match |
|        |             |            |          | GAGTGCA |          |     |    |    |    |     |     |     |       |       |       |
|        |             |            |          | GGCAGA/ |          |     |    |    |    |     |     |     |       |       |       |
|        |             |            |          | GAGTGCA |          |     |    |    |    |     |     |     |       |       |       |
| 115239 | TruSeqV2    | 2:38298421 | fs       | GGCAGA  | 6.42E-14 | 186 | 99 | 31 | 87 | 0/0 | 0/0 | 0/0 | match | match | match |
|        |             |            |          | GAGTGCA |          |     |    |    |    |     |     |     |       |       |       |
|        |             |            |          | GGCAGA/ |          |     |    |    |    |     |     |     |       |       |       |
|        |             |            |          | GAGTGCA |          |     |    |    |    |     |     |     |       |       |       |
| 132306 | Agilent38MB | 2:38298421 | fs       | GGCAGA  | 1.78E-15 | 186 | 99 | 31 | 87 | 0/0 | 0/0 | 0/0 | match | match | match |
|        |             |            |          | GAGTGCA |          |     |    |    |    |     |     |     |       |       |       |
|        |             |            |          | GGCAGA/ |          |     |    |    |    |     |     |     |       |       |       |
|        |             |            |          | GAGTGCA |          |     |    |    |    |     |     |     |       |       |       |
| 163383 | TruSeqV2    | 2:38298421 | fs       | GGCAGA  | 1.84E-14 | 186 | 99 | 31 | 87 | 0/0 | 0/0 | 0/0 | match | match | match |
|        |             |            |          | GAGTGCA |          |     |    |    |    |     |     |     |       |       |       |
|        |             |            |          | GGCAGA/ |          |     |    |    |    |     |     |     |       |       |       |
|        |             |            |          | GAGTGCA |          |     |    |    |    |     |     |     |       |       |       |
| 198564 | Agilent38MB | 2:38298421 | fs       | GGCAGA  | 2.02E-14 | 186 | 99 | 31 | 87 | 0/0 | 0/0 | 0/0 | match | match | match |
| 108971 | TruSeqV2    | 2:38298434 | stop     | G/G     | 4.04E-14 | 164 | 99 | 33 | 93 | 0/0 | 0/0 | 0/0 | match | match | match |
| 115239 | TruSeqV2    | 2:38298434 | stop     | G/G     | 8.88E-16 | 121 | 99 | 37 | 99 | 0/0 | 0/0 | 0/0 | match | match | match |
| 132306 | Agilent38MB | 2:38298434 | stop     | G/G     | 2.22E-16 | 43  | 99 | 38 | 99 | 0/0 | 0/0 | 0/0 | match | match | match |

|        |             |             |          |     |          |     |    |    |    |     |     |     |       |       |       |
|--------|-------------|-------------|----------|-----|----------|-----|----|----|----|-----|-----|-----|-------|-------|-------|
| 163383 | TruSeqV2    | 2:38298434  | stop     | G/G | 4.44E-16 | 136 | 99 | 36 | 87 | 0/0 | 0/0 | 0/0 | match | match | match |
| 198564 | Agilent38MB | 2:38298434  | stop     | G/G | 2.22E-16 | 84  | 99 | 46 | 99 | 0/0 | 0/0 | 0/0 | match | match | match |
| 108971 | TruSeqV2    | 2:38302350  | missense | C/C | 3.32E-10 | 4   | 12 | 11 | 33 | 0/0 | 0/0 | 0/0 | match | match | match |
| 115239 | TruSeqV2    | 2:38302350  | missense | C/C | 2.22E-15 | 2   | 6  | 4  | 11 | 0/0 | 0/0 | 0/0 | match | match | match |
| 132306 | Agilent38MB | 2:38302350  | missense | C/C | 4.00E-15 | 5   | 14 | 5  | 15 | 0/0 | 0/0 | 0/0 | match | match | match |
| 163383 | TruSeqV2    | 2:38302350  | missense | C/C | 1.78E-15 | 1   | 3  | 11 | 33 | 0/0 | 0/0 | 0/0 | match | match | match |
| 198564 | Agilent38MB | 2:38302350  | missense | C/C | 5.33E-15 | 12  | 27 | 22 | 63 | 0/0 | 0/0 | 0/0 | match | match | match |
| 108971 | TruSeqV2    | 2:38302451  | synon    | C/C | 3.50E-13 | 8   | 15 | 23 | 54 | 0/0 | 0/0 | 0/0 | match | match | match |
| 115239 | TruSeqV2    | 2:38302451  | synon    | C/C | 5.11E-15 | 8   | 15 | 8  | 24 | 0/0 | 0/0 | 0/0 | match | match | match |
| 132306 | Agilent38MB | 2:38302451  | synon    | C/C | 7.11E-15 | 15  | 36 | 20 | 45 | 0/0 | 0/0 | 0/0 | match | match | match |
| 163383 | TruSeqV2    | 2:38302451  | synon    | C/C | 2.00E-14 | 6   | 12 | 11 | 27 | 0/0 | 0/0 | 0/0 | match | match | match |
| 198564 | Agilent38MB | 2:38302451  | synon    | C/C | 2.71E-14 | 38  | 90 | 28 | 72 | 0/0 | 0/0 | 0/0 | match | match | match |
| 108971 | TruSeqV2    | 20:48124462 | missense | G/G | 2.22E-16 | 176 | 99 | 35 | 78 | 0/0 | 0/0 | 0/0 | match | match | match |
| 115239 | TruSeqV2    | 20:48124462 | missense | G/G | 2.22E-16 | 113 | 99 | 17 | 39 | 0/0 | 0/0 | 0/0 | match | match | match |
| 132306 | Agilent38MB | 20:48124462 | missense | G/G | 4.44E-16 | 68  | 99 | 22 | 60 | 0/0 | 0/0 | 0/0 | match | match | match |
| 163383 | TruSeqV2    | 20:48124462 | missense | G/G | 4.44E-16 | 145 | 99 | 25 | 75 | 0/0 | 0/0 | 0/0 | match | match | match |
| 198564 | Agilent38MB | 20:48124462 | missense | G/G | 4.44E-16 | 137 | 99 | 29 | 78 | 0/0 | 0/0 | 0/0 | match | match | match |
| 108971 | TruSeqV2    | 20:48127684 | synon    | G/G | 2.22E-16 | 163 | 99 | 44 | 99 | 0/0 | 0/0 | 0/0 | match | match | match |
| 115239 | TruSeqV2    | 20:48127684 | synon    | G/G | 2.22E-16 | 111 | 99 | 38 | 99 | 0/0 | 0/0 | 0/0 | match | match | match |
| 132306 | Agilent38MB | 20:48127684 | synon    | G/G | 2.22E-16 | 52  | 99 | 38 | 99 | 0/0 | 0/0 | 0/0 | match | match | match |
| 163383 | TruSeqV2    | 20:48127684 | synon    | G/G | 2.22E-16 | 114 | 99 | 34 | 66 | 0/0 | 0/0 | 0/0 | match | match | match |
| 198564 | Agilent38MB | 20:48127684 | synon    | G/G | 2.22E-15 | 99  | 99 | 50 | 99 | 0/0 | 0/0 | 0/0 | match | match | match |
| 108971 | TruSeqV2    | 20:48129688 | missense | G/G | 2.22E-16 | 76  | 99 | 27 | 69 | 0/0 | 0/0 | 0/0 | match | match | match |
| 115239 | TruSeqV2    | 20:48129688 | missense | G/G | 6.66E-16 | 37  | 99 | 10 | 27 | 0/0 | 0/0 | 0/0 | match | match | match |
| 132306 | Agilent38MB | 20:48129688 | missense | G/G | 2.22E-16 | 94  | 99 | 25 | 72 | 0/0 | 0/0 | 0/0 | match | match | match |
| 163383 | TruSeqV2    | 20:48129688 | missense | G/G | 4.44E-16 | 51  | 99 | 19 | 51 | 0/0 | 0/0 | 0/0 | match | match | match |
| 198564 | Agilent38MB | 20:48129688 | missense | G/G | 4.88E-15 | 192 | 99 | 25 | 72 | 0/0 | 0/0 | 0/0 | match | match | match |
| 108971 | TruSeqV2    | 20:48129706 | synon    | G/G | 6.44E-15 | 81  | 99 | 29 | 84 | 0/0 | 0/0 | 0/0 | match | match | match |
| 115239 | TruSeqV2    | 20:48129706 | synon    | T/T | 4.66E-15 | 35  | 99 | 13 | 39 | 1/1 | 1/1 | 1/1 | match | match | match |
| 132306 | Agilent38MB | 20:48129706 | synon    | G/G | 4.44E-16 | 61  | 99 | 27 | 72 | 0/0 | 0/0 | 0/0 | match | match | match |
| 163383 | TruSeqV2    | 20:48129706 | synon    | G/G | 2.00E-15 | 58  | 99 | 17 | 36 | 0/0 | 0/0 | 0/0 | match | match | match |
| 198564 | Agilent38MB | 20:48129706 | synon    | G/G | 2.66E-15 | 132 | 99 | 30 | 78 | 0/0 | 0/0 | 0/0 | match | match | match |
| 108971 | TruSeqV2    | 20:48140727 | synon    | T/T | 6.34E-10 | 157 | 99 | 48 | 99 | 0/0 | 0/0 | 0/0 | match | match | match |
| 115239 | TruSeqV2    | 20:48140727 | synon    | T/T | 5.95E-10 | 119 | 99 | 18 | 51 | 0/0 | 0/0 | 0/0 | match | match | match |
| 132306 | Agilent38MB | 20:48140727 | synon    | T/T | 1.31E-09 | 51  | 99 | 30 | 69 | 0/0 | 0/0 | 0/0 | match | match | match |
| 163383 | TruSeqV2    | 20:48140727 | synon    | T/T | 8.42E-12 | 132 | 99 | 35 | 90 | 0/0 | 0/0 | 0/0 | match | match | match |
| 198564 | Agilent38MB | 20:48140727 | synon    | T/T | 2.02E-09 | 105 | 99 | 49 | 99 | 0/0 | 0/0 | 0/0 | match | match | match |
| 108971 | TruSeqV2    | 20:48140744 | missense | G/G | 2.22E-16 | 146 | 99 | 47 | 99 | 0/0 | 0/0 | 0/0 | match | match | match |

|        |             |             |          |     |          |     |    |    |    |     |     |     |       |       |       |
|--------|-------------|-------------|----------|-----|----------|-----|----|----|----|-----|-----|-----|-------|-------|-------|
| 115239 | TruSeqV2    | 20:48140744 | missense | G/G | 2.22E-16 | 108 | 99 | 21 | 60 | 0/0 | 0/0 | 0/0 | match | match | match |
| 132306 | Agilent38MB | 20:48140744 | missense | G/G | 2.22E-16 | 60  | 99 | 25 | 58 | 0/0 | 0/0 | 0/0 | match | match | match |
| 163383 | TruSeqV2    | 20:48140744 | missense | G/G | 4.44E-16 | 123 | 99 | 38 | 99 | 0/0 | 0/0 | 0/0 | match | match | match |
| 198564 | Agilent38MB | 20:48140744 | missense | G/G | 4.44E-16 | 113 | 99 | 44 | 99 | 0/0 | 0/0 | 0/0 | match | match | match |
| 108971 | TruSeqV2    | 20:48156189 | synon    | G/G | 2.22E-16 | 140 | 99 | 37 | 93 | 0/0 | 0/0 | 0/0 | match | match | match |
| 115239 | TruSeqV2    | 20:48156189 | synon    | G/G | 2.22E-16 | 80  | 99 | 21 | 54 | 0/0 | 0/0 | 0/0 | match | match | match |
| 132306 | Agilent38MB | 20:48156189 | synon    | G/G | 4.44E-16 | 35  | 69 | 22 | 66 | 0/0 | 0/0 | 0/0 | match | match | match |
| 163383 | TruSeqV2    | 20:48156189 | synon    | G/G | 2.22E-16 | 88  | 99 | 36 | 96 | 0/0 | 0/0 | 0/0 | match | match | match |
| 198564 | Agilent38MB | 20:48156189 | synon    | G/G | 6.66E-16 | 62  | 99 | 29 | 72 | 0/0 | 0/0 | 0/0 | match | match | match |
| 108971 | TruSeqV2    | 20:48160852 | missense | A/A | 1.95E-12 | 78  | 99 | 38 | 99 | 0/0 | 0/0 | 0/0 | match | match | match |
| 115239 | TruSeqV2    | 20:48160852 | missense | A/A | 4.58E-13 | 54  | 99 | 24 | 69 | 0/0 | 0/0 | 0/0 | match | match | match |
| 132306 | Agilent38MB | 20:48160852 | missense | A/A | 2.22E-16 | 44  | 99 | 37 | 93 | 0/0 | 0/0 | 0/0 | match | match | match |
| 163383 | TruSeqV2    | 20:48160852 | missense | A/A | 6.00E-15 | 67  | 99 | 34 | 66 | 0/0 | 0/0 | 0/0 | match | match | match |
| 198564 | Agilent38MB | 20:48160852 | missense | A/A | 2.60E-14 | 91  | 99 | 48 | 99 | 0/0 | 0/0 | 0/0 | match | match | match |
| 108971 | TruSeqV2    | 20:48160902 | missense | T/T | 2.22E-16 | 109 | 99 | 41 | 96 | 0/0 | 0/0 | 0/0 | match | match | match |
| 115239 | TruSeqV2    | 20:48160902 | missense | T/T | 8.88E-16 | 65  | 99 | 33 | 93 | 0/0 | 0/0 | 0/0 | match | match | match |
| 132306 | Agilent38MB | 20:48160902 | missense | T/T | 2.22E-16 | 62  | 99 | 38 | 96 | 0/0 | 0/0 | 0/0 | match | match | match |
| 163383 | TruSeqV2    | 20:48160902 | missense | T/T | 1.33E-15 | 73  | 99 | 33 | 84 | 0/0 | 0/0 | 0/0 | match | match | match |
| 198564 | Agilent38MB | 20:48160902 | missense | T/T | 4.44E-16 | 146 | 99 | 44 | 99 | 0/0 | 0/0 | 0/0 | match | match | match |
| 108971 | TruSeqV2    | 20:48160961 | missense | C/C | 2.22E-16 | 61  | 99 | 37 | 99 | 0/0 | 0/0 | 0/0 | match | match | match |
| 115239 | TruSeqV2    | 20:48160961 | missense | C/C | 4.44E-16 | 37  | 79 | 34 | 78 | 0/0 | 0/0 | 0/0 | match | match | match |
| 132306 | Agilent38MB | 20:48160961 | missense | C/C | 2.22E-16 | 102 | 99 | 42 | 99 | 0/0 | 0/0 | 0/0 | match | match | match |
| 163383 | TruSeqV2    | 20:48160961 | missense | C/C | 8.88E-16 | 37  | 96 | 51 | 99 | 0/0 | 0/0 | 0/0 | match | match | match |
| 198564 | Agilent38MB | 20:48160961 | missense | C/C | 4.44E-15 | 197 | 99 | 30 | 60 | 0/0 | 0/0 | 0/0 | match | match | match |
| 108971 | TruSeqV2    | 20:48164401 | missense | A/A | 2.58E-14 | 154 | 99 | 27 | 75 | 0/0 | 0/0 | 0/0 | match | match | match |
| 115239 | TruSeqV2    | 20:48164401 | missense | A/A | 2.49E-14 | 93  | 99 | 32 | 90 | 0/0 | 0/0 | 0/0 | match | match | match |
| 132306 | Agilent38MB | 20:48164401 | missense | A/A | 2.62E-14 | 57  | 99 | 34 | 90 | 0/0 | 0/0 | 0/0 | match | match | match |
| 163383 | TruSeqV2    | 20:48164401 | missense | A/A | 2.40E-14 | 130 | 99 | 36 | 91 | 0/0 | 0/0 | 0/0 | match | match | match |
| 198564 | Agilent38MB | 20:48164401 | missense | A/A | 4.17E-14 | 107 | 99 | 50 | 99 | 0/0 | 0/0 | 0/0 | match | match | match |
| 108971 | TruSeqV2    | 20:48164497 | synon    | C/C | 6.66E-16 | 145 | 99 | 38 | 99 | 0/0 | 0/0 | 0/0 | match | match | match |
| 115239 | TruSeqV2    | 20:48164497 | synon    | C/C | 2.22E-16 | 96  | 99 | 28 | 66 | 0/0 | 0/0 | 0/0 | match | match | match |
| 132306 | Agilent38MB | 20:48164497 | synon    | C/C | 2.22E-16 | 20  | 42 | 27 | 66 | 0/0 | 0/0 | 0/0 | match | match | match |
| 163383 | TruSeqV2    | 20:48164497 | synon    | C/C | 4.44E-16 | 142 | 99 | 32 | 72 | 0/0 | 0/0 | 0/0 | match | match | match |
| 198564 | Agilent38MB | 20:48164497 | synon    | C/C | 8.88E-16 | 35  | 87 | 37 | 99 | 0/0 | 0/0 | 0/0 | match | match | match |
| 108971 | TruSeqV2    | 20:52771092 | 3'UTR    | A/A | 2.22E-16 | 140 | 99 | 25 | 69 | 0/0 | 0/0 | 0/0 | match | match | match |
| 115239 | TruSeqV2    | 20:52771092 | 3'UTR    | A/A | 2.22E-16 | 140 | 99 | 25 | 69 | 0/0 | 0/0 | 0/0 | match | match | match |
| 132306 | Agilent38MB | 20:52771092 | 3'UTR    | A/A | 3.33E-15 | 140 | 99 | 25 | 69 | 0/0 | 0/0 | 0/0 | match | match | match |
| 163383 | TruSeqV2    | 20:52771092 | 3'UTR    | A/A | 4.44E-16 | 140 | 99 | 25 | 69 | 0/0 | 0/0 | 0/0 | match | match | match |

|        |             |             |          |     |          |     |    |    |    |     |     |     |       |       |       |
|--------|-------------|-------------|----------|-----|----------|-----|----|----|----|-----|-----|-----|-------|-------|-------|
| 198564 | Agilent38MB | 20:52771092 | 3'UTR    | A/A | 1.55E-15 | 140 | 99 | 25 | 69 | 0/0 | 0/0 | 0/0 | match | match | match |
| 108971 | TruSeqV2    | 20:52771171 | 3'UTR    | A/A | 2.89E-15 | 79  | 99 | 29 | 81 | 0/0 | 0/0 | 0/0 | match | match | match |
| 115239 | TruSeqV2    | 20:52771171 | 3'UTR    | G/A | 1.22E-14 | 55  | 99 | 41 | 99 | 0/1 | 0/1 | 0/1 | match | match | match |
| 163383 | TruSeqV2    | 20:52771171 | 3'UTR    | A/A | 9.04E-14 | 73  | 99 | 29 | 78 | 0/0 | 0/0 | 0/0 | match | match | match |
| 108971 | TruSeqV2    | 20:52771215 | 3'UTR    | C/C | 1.78E-15 | 51  | 99 | 32 | 90 | 0/0 | 0/0 | 0/0 | match | match | match |
| 115239 | TruSeqV2    | 20:52771215 | 3'UTR    | C/C | 1.11E-15 | 37  | 90 | 42 | 99 | 0/0 | 0/0 | 0/0 | match | match | match |
| 163383 | TruSeqV2    | 20:52771215 | 3'UTR    | C/C | 1.87E-14 | 50  | 99 | 36 | 99 | 0/0 | 0/0 | 0/0 | match | match | match |
| 198564 | Agilent38MB | 20:52771215 | 3'UTR    | C/C | 1.78E-15 | 1   | 3  | 49 | 99 | 0/0 | 0/0 | 0/0 | match | match | match |
| 108971 | TruSeqV2    | 20:52771250 | 3'UTR    | G/G | 4.44E-16 | 29  | 81 | 33 | 87 | 0/0 | 0/0 | 0/0 | match | match | match |
| 115239 | TruSeqV2    | 20:52771250 | 3'UTR    | G/G | 4.44E-16 | 26  | 63 | 38 | 99 | 0/0 | 0/0 | 0/0 | match | match | match |
| 163383 | TruSeqV2    | 20:52771250 | 3'UTR    | G/G | 4.44E-16 | 30  | 84 | 39 | 99 | 0/0 | 0/0 | 0/0 | match | match | match |
| 108971 | TruSeqV2    | 20:52771261 | 3'UTR    | G/G | 2.40E-14 | 27  | 69 | 33 | 84 | 0/0 | 0/0 | 0/0 | match | match | match |
| 115239 | TruSeqV2    | 20:52771261 | 3'UTR    | G/G | 5.77E-15 | 23  | 60 | 41 | 99 | 0/0 | 0/0 | 0/0 | match | match | match |
| 163383 | TruSeqV2    | 20:52771261 | 3'UTR    | G/G | 2.80E-14 | 28  | 72 | 37 | 99 | 0/0 | 0/0 | 0/0 | match | match | match |
| 108971 | TruSeqV2    | 20:52774635 | missense | A/A | 1.20E-13 | 117 | 99 | 41 | 99 | 0/0 | 0/0 | 0/0 | match | match | match |
| 115239 | TruSeqV2    | 20:52774635 | missense | A/A | 3.55E-15 | 90  | 99 | 40 | 99 | 0/0 | 0/0 | 0/0 | match | match | match |
| 132306 | Agilent38MB | 20:52774635 | missense | A/A | 1.55E-15 | 85  | 99 | 37 | 99 | 0/0 | 0/0 | 0/0 | match | match | match |
| 163383 | TruSeqV2    | 20:52774635 | missense | A/A | 3.33E-15 | 97  | 99 | 55 | 99 | 0/0 | 0/0 | 0/0 | match | match | match |
| 198564 | Agilent38MB | 20:52774635 | missense | A/A | 1.33E-12 | 128 | 99 | 51 | 99 | 0/0 | 0/0 | 0/0 | match | match | match |
| 108971 | TruSeqV2    | 20:52781091 | synon    | C/C | 2.22E-16 | 28  | 81 | 32 | 87 | 0/0 | 0/0 | 0/0 | match | match | match |
| 115239 | TruSeqV2    | 20:52781091 | synon    | C/C | 2.22E-16 | 20  | 54 | 41 | 99 | 0/0 | 0/0 | 0/0 | match | match | match |
| 132306 | Agilent38MB | 20:52781091 | synon    | C/C | 4.44E-16 | 279 | 99 | 35 | 99 | 0/0 | 0/0 | 0/0 | match | match | match |
| 163383 | TruSeqV2    | 20:52781091 | synon    | C/C | 2.22E-16 | 19  | 54 | 34 | 93 | 0/0 | 0/0 | 0/0 | match | match | match |
| 198564 | Agilent38MB | 20:52781091 | synon    | C/C | 1.11E-15 | 621 | 99 | 32 | 93 | 0/0 | 0/0 | 0/0 | match | match | match |
| 108971 | TruSeqV2    | 20:52786219 | synon    | G/G | 6.88E-15 | 96  | 99 | 36 | 87 | 0/0 | 0/0 | 0/0 | match | match | match |
| 115239 | TruSeqV2    | 20:52786219 | synon    | A/A | 6.44E-15 | 64  | 99 | 40 | 39 | 1/1 | 1/1 | 1/1 | match | match | match |
| 132306 | Agilent38MB | 20:52786219 | synon    | A/A | 2.00E-15 | 115 | 99 | 26 | 78 | 1/1 | 1/1 | 1/1 | match | match | match |
| 163383 | TruSeqV2    | 20:52786219 | synon    | G/A | 6.66E-16 | 105 | 99 | 36 | 99 | 0/1 | 0/1 | 0/1 | match | match | match |
| 198564 | Agilent38MB | 20:52786219 | synon    | G/A | 4.44E-16 | 166 | 99 | 40 | 99 | 0/1 | 0/1 | 0/1 | match | match | match |
| 108971 | TruSeqV2    | 20:61288423 | missense | G/G | 2.94E-10 | 57  | 99 | 33 | 87 | 0/0 | 0/0 | 0/0 | match | match | match |
| 115239 | TruSeqV2    | 20:61288423 | missense | G/G | 5.93E-08 | 37  | 99 | 3  | 9  | 0/0 | 0/0 | 0/0 | match | match | match |
| 132306 | Agilent38MB | 20:61288423 | missense | G/G | 1.07E-08 | 11  | 24 | 21 | 57 | 0/0 | 0/0 | 0/0 | match | match | match |
| 163383 | TruSeqV2    | 20:61288423 | missense | G/G | 7.06E-09 | 38  | 99 | 26 | 78 | 0/0 | 0/0 | 0/0 | match | match | match |
| 198564 | Agilent38MB | 20:61288423 | missense | G/G | 1.82E-07 | 24  | 48 | 35 | 90 | 0/0 | 0/0 | 0/0 | match | match | match |
| 108971 | TruSeqV2    | 20:61299341 | intronic | G/G | 5.48E-14 | 206 | 99 | 43 | 99 | 0/0 | 0/0 | 0/0 | match | match | match |
| 115239 | TruSeqV2    | 20:61299341 | intronic | G/G | 2.00E-15 | 143 | 99 | 15 | 39 | 0/0 | 0/0 | 0/0 | match | match | match |
| 132306 | Agilent38MB | 20:61299341 | intronic | G/G | 7.55E-15 | 87  | 99 | 25 | 75 | 0/0 | 0/0 | 0/0 | match | match | match |
| 163383 | TruSeqV2    | 20:61299341 | intronic | G/G | 1.55E-15 | 146 | 99 | 28 | 78 | 0/0 | 0/0 | 0/0 | match | match | match |



|        |             |             |          |     |          |     |    |    |    |     |     |     |       |       |       |
|--------|-------------|-------------|----------|-----|----------|-----|----|----|----|-----|-----|-----|-------|-------|-------|
| 198564 | Agilent38MB | 20:61299341 | intronic | G/G | 4.00E-15 | 154 | 99 | 46 | 99 | 0/0 | 0/0 | 0/0 | match | match | match |
| 108971 | TruSeqV2    | 20:61303290 | 3'UTR    | C/C | 8.88E-16 | 121 | 99 | 52 | 99 | 0/0 | 0/0 | 0/0 | match | match | match |
| 115239 | TruSeqV2    | 20:61303290 | 3'UTR    | C/C | 1.11E-15 | 84  | 99 | 18 | 51 | 0/0 | 0/0 | 0/0 | match | match | match |
| 132306 | Agilent38MB | 20:61303290 | 3'UTR    | C/C | 2.66E-15 | 23  | 54 | 44 | 99 | 0/0 | 0/0 | 0/0 | match | match | match |
| 163383 | TruSeqV2    | 20:61303290 | 3'UTR    | C/C | 8.88E-16 | 106 | 99 | 45 | 99 | 0/0 | 0/0 | 0/0 | match | match | match |
| 198564 | Agilent38MB | 20:61303290 | 3'UTR    | C/C | 4.44E-16 | 55  | 99 | 53 | 99 | 0/0 | 0/0 | 0/0 | match | match | match |
| 108971 | TruSeqV2    | 20:61303742 | 3'UTR    | C/C | 1.55E-15 | 12  | 2  | 29 | 86 | 1/1 | 1/1 | 1/1 | match | match | match |
| 115239 | TruSeqV2    | 20:61303742 | 3'UTR    | C/C | 8.88E-16 | 11  | 33 | 22 | 66 | 1/1 | 1/1 | 1/1 | match | match | match |
| 163383 | TruSeqV2    | 20:61303742 | 3'UTR    | C/C | 8.88E-16 | 9   | 27 | 29 | 86 | 1/1 | 1/1 | 1/1 | match | match | match |
| 108971 | TruSeqV2    | 21:37442675 | missense | G/G | 2.44E-15 | 65  | 99 | 35 | 84 | 0/0 | 0/0 | 0/0 | match | match | match |
| 115239 | TruSeqV2    | 21:37442675 | missense | G/G | 1.11E-15 | 41  | 99 | 12 | 35 | 0/0 | 0/0 | 0/0 | match | match | match |
| 132306 | Agilent38MB | 21:37442675 | missense | G/G | 4.44E-16 | 41  | 99 | 14 | 33 | 0/0 | 0/0 | 0/0 | match | match | match |
| 163383 | TruSeqV2    | 21:37442675 | missense | G/G | 1.11E-15 | 44  | 99 | 25 | 75 | 0/0 | 0/0 | 0/0 | match | match | match |
| 198564 | Agilent38MB | 21:37442675 | missense | G/G | 1.00E-13 | 62  | 99 | 43 | 99 | 0/0 | 0/0 | 0/0 | match | match | match |
| 108971 | TruSeqV2    | 21:37443349 | missense | C/C | 8.88E-16 | 83  | 99 | 31 | 78 | 0/0 | 0/0 | 0/0 | match | match | match |
| 115239 | TruSeqV2    | 21:37443349 | missense | C/C | 6.66E-16 | 72  | 99 | 36 | 99 | 0/0 | 0/0 | 0/0 | match | match | match |
| 132306 | Agilent38MB | 21:37443349 | missense | C/C | 1.69E-14 | 90  | 99 | 41 | 99 | 0/0 | 0/0 | 0/0 | match | match | match |
| 163383 | TruSeqV2    | 21:37443349 | missense | C/C | 4.00E-15 | 98  | 99 | 38 | 96 | 0/0 | 0/0 | 0/0 | match | match | match |
| 198564 | Agilent38MB | 21:37443349 | missense | C/C | 8.88E-16 | 148 | 99 | 48 | 99 | 0/0 | 0/0 | 0/0 | match | match | match |
| 108971 | TruSeqV2    | 21:37443565 | intronic | C/G | 8.88E-16 | 13  | 99 | 37 | 99 | 0/1 | 0/1 | 0/1 | match | match | match |
| 163383 | TruSeqV2    | 21:37443565 | intronic | C/C | 1.13E-14 | 11  | 33 | 29 | 87 | 1/1 | 1/1 | 1/1 | match | match | match |
| 108971 | TruSeqV2    | 21:37444696 | intronic | C/C | 4.44E-16 | 12  | 33 | 58 | 99 | 0/0 | 0/0 | 0/0 | match | match | match |
| 115239 | TruSeqV2    | 21:37444696 | intronic | C/C | 4.22E-15 | 11  | 33 | 45 | 99 | 0/0 | 0/0 | 0/0 | match | match | match |
| 132306 | Agilent38MB | 21:37444696 | intronic | C/C | 4.44E-16 | 55  | 99 | 37 | 93 | 0/0 | 0/0 | 0/0 | match | match | match |
| 163383 | TruSeqV2    | 21:37444696 | intronic | C/C | 4.44E-16 | 10  | 30 | 43 | 99 | 0/0 | 0/0 | 0/0 | match | match | match |
| 198564 | Agilent38MB | 21:37444696 | intronic | C/C | 4.44E-16 | 87  | 99 | 50 | 99 | 0/0 | 0/0 | 0/0 | match | match | match |
| 108971 | TruSeqV2    | 21:37445739 | 3'UTR    | C/C | 2.00E-15 | 2   | 6  | 34 | 93 | 0/0 | 0/0 | 0/0 | match | match | match |
| 132306 | Agilent38MB | 21:37445739 | 3'UTR    | C/C | 8.88E-16 | 2   | 6  | 44 | 99 | 0/0 | 0/0 | 0/0 | match | match | match |
| 132306 | Agilent38MB | 21:37507501 | missense | G/G | 3.33E-14 | 9   | 21 | 4  | 12 | 0/0 | 0/0 | 0/0 | match | match | match |
| 198564 | Agilent38MB | 21:37507501 | missense | G/G | 1.05E-08 | 2   | 3  | 26 | 69 | 0/0 | 0/0 | 0/0 | match | match | match |
| 108971 | TruSeqV2    | 21:37507740 | missense | C/C | 1.22E-09 | 42  | 99 | 1  | 3  | 0/0 | 0/0 | 0/0 | match | match | match |
| 115239 | TruSeqV2    | 21:37507740 | missense | C/C | 4.44E-16 | 40  | 99 | 12 | 35 | 0/0 | 0/0 | 0/0 | match | match | match |
| 198564 | Agilent38MB | 21:37507740 | missense | C/C | 4.44E-16 | 63  | 99 | 8  | 23 | 0/0 | 0/0 | 0/0 | match | match | match |
| 108971 | TruSeqV2    | 21:37507767 | missense | G/G | 4.04E-11 | 38  | 99 | 1  | 3  | 0/0 | 0/0 | 0/0 | match | match | match |
| 115239 | TruSeqV2    | 21:37507767 | missense | G/G | 6.00E-15 | 37  | 99 | 10 | 24 | 0/0 | 0/0 | 0/0 | match | match | match |
| 198564 | Agilent38MB | 21:37507767 | missense | G/G | 1.78E-15 | 58  | 99 | 9  | 24 | 0/0 | 0/0 | 0/0 | match | match | match |
| 108971 | TruSeqV2    | 21:37510224 | missense | C/C | 1.33E-15 | 96  | 99 | 22 | 54 | 0/0 | 0/0 | 0/0 | match | match | match |
| 115239 | TruSeqV2    | 21:37510224 | missense | C/C | 3.89E-14 | 68  | 99 | 35 | 84 | 0/0 | 0/0 | 0/0 | match | match | match |

|        |             |             |          |     |             |     |    |    |    |     |     |     |       |       |       |
|--------|-------------|-------------|----------|-----|-------------|-----|----|----|----|-----|-----|-----|-------|-------|-------|
| 132306 | Agilent38MB | 21:37510224 | missense | C/C | 4.44E-16    | 157 | 99 | 26 | 78 | 0/0 | 0/0 | 0/0 | match | match | match |
| 163383 | TruSeqV2    | 21:37510224 | missense | C/C | 1.11E-15    | 94  | 99 | 28 | 78 | 0/0 | 0/0 | 0/0 | match | match | match |
| 198564 | Agilent38MB | 21:37510224 | missense | C/C | 1.33E-14    | 220 | 99 | 32 | 87 | 0/0 | 0/0 | 0/0 | match | match | match |
| 108971 | TruSeqV2    | 21:37518362 | intronic | A/G | 2.22E-15    | 110 | 99 | 40 | 99 | 0/1 | 0/1 | 0/1 | match | match | match |
| 115239 | TruSeqV2    | 21:37518362 | intronic | G/G | 8.88E-16    | 78  | 99 | 37 | 68 | 1/1 | 1/1 | 1/1 | match | match | match |
| 132306 | Agilent38MB | 21:37518362 | intronic | G/G | 1.78E-15    | 43  | 99 | 39 | 99 | 1/1 | 1/1 | 1/1 | match | match | match |
| 163383 | TruSeqV2    | 21:37518362 | intronic | G/G | 1.11E-15    | 81  | 99 | 41 | 99 | 1/1 | 1/1 | 1/1 | match | match | match |
| 198564 | Agilent38MB | 21:37518362 | intronic | G/G | 1.20E-14    | 73  | 99 | 40 | 99 | 1/1 | 1/1 | 1/1 | match | match | match |
| 108971 | TruSeqV2    | 21:37518706 | missense | A/G | 6.66E-16    | 137 | 99 | 28 | 99 | 0/1 | 0/1 | 0/1 | match | match | match |
| 115239 | TruSeqV2    | 21:37518706 | missense | G/G | 1.33E-15    | 81  | 99 | 24 | 51 | 0/0 | 0/0 | 0/0 | match | match | match |
| 132306 | Agilent38MB | 21:37518706 | missense | A/A | 4.51E-14    | 161 | 99 | 30 | 90 | 1/1 | 1/1 | 1/1 | match | match | match |
| 163383 | TruSeqV2    | 21:37518706 | missense | A/A | 3.55E-15    | 96  | 99 | 30 | 90 | 1/1 | 1/1 | 1/1 | match | match | match |
| 198564 | Agilent38MB | 21:37518706 | missense | A/A | 3.09E-13    | 304 | 99 | 43 | 99 | 1/1 | 1/1 | 1/1 | match | match | match |
| 198564 | Agilent38MB | 21:43707101 | intronic | G/G | 9.10E-15    | 4   | 12 | 27 | 80 | 1/1 | 1/1 | 1/1 | match | match | match |
| 108971 | TruSeqV2    | 21:43710909 | intronic | G/G | 2.09E-13    | 3   | 9  | 33 | 99 | 1/1 | 1/1 | 1/1 | match | match | match |
| 163383 | TruSeqV2    | 21:43710909 | intronic | G/G | 9.84E-14    | 2   | 6  | 42 | 99 | 1/1 | 1/1 | 1/1 | match | match | match |
| 198564 | Agilent38MB | 21:43710909 | intronic | C/C | 2.89E-15    | 2   | 3  | 34 | 93 | 0/0 | 0/0 | 0/0 | match | match | match |
| 198564 | Agilent38MB | 21:43716022 | intronic | A/A | 7.99E-15    | 2   | 6  | 36 | 99 | 1/1 | 1/1 | 1/1 | match | match | match |
| 108971 | TruSeqV2    | 21:43716901 | 3'UTR    | G/G | 1.02E-13    | 195 | 99 | 32 | 96 | 1/1 | 1/1 | 1/1 | match | match | match |
| 115239 | TruSeqV2    | 21:43716901 | 3'UTR    | A/G | 8.21E-13    | 162 | 99 | 32 | 99 | 0/1 | 0/1 | 0/1 | match | match | match |
| 163383 | TruSeqV2    | 21:43716901 | 3'UTR    | G/G | 3.55E-15    | 185 | 99 | 46 | 99 | 1/1 | 1/1 | 1/1 | match | match | match |
| 198564 | Agilent38MB | 21:43716901 | 3'UTR    | G/G | 7.24E-14    | 2   | 6  | 40 | 99 | 1/1 | 1/1 | 1/1 | match | match | match |
| 108971 | TruSeqV2    | 21:46945782 | synon    | G/G | 8.88E-16    | 203 | 99 | 53 | 99 | 0/0 | 0/0 | 0/0 | match | match | match |
| 115239 | TruSeqV2    | 21:46945782 | synon    | G/G | 1.07E-14    | 104 | 99 | 22 | 60 | 0/0 | 0/0 | 0/0 | match | match | match |
| 132306 | Agilent38MB | 21:46945782 | synon    | G/G | 1.33E-15    | 80  | 99 | 35 | 99 | 0/0 | 0/0 | 0/0 | match | match | match |
| 163383 | TruSeqV2    | 21:46945782 | synon    | G/G | 6.66E-16    | 112 | 99 | 38 | 99 | 0/0 | 0/0 | 0/0 | match | match | match |
| 198564 | Agilent38MB | 21:46945782 | synon    | G/G | 2.89E-15    | 178 | 99 | 47 | 99 | 0/0 | 0/0 | 0/0 | match | match | match |
| 132306 | Agilent38MB | 21:46951556 | synon    | G/G | 6.02E-05    | 29  | 87 | 12 | 35 | 1/1 | 1/1 | 1/1 | match | match | match |
| 198564 | Agilent38MB | 21:46951556 | synon    | G/A | 3.08E-05    | 43  | 99 | 26 | 99 | 0/1 | 0/1 | 0/1 | match | match | match |
| 108971 | TruSeqV2    | 21:46952006 | synon    | G/G | 1.92E-07    | 81  | 99 | 40 | 99 | 0/0 | 0/0 | 0/0 | match | match | match |
| 115239 | TruSeqV2    | 21:46952006 | synon    | G/G | 4.40E-05    | 49  | 99 | 12 | 30 | 0/0 | 0/0 | 0/0 | match | match | match |
| 132306 | Agilent38MB | 21:46952006 | synon    | G/G | 2.39E-12    | 128 | 99 | 23 | 57 | 0/0 | 0/0 | 0/0 | match | match | match |
| 163383 | TruSeqV2    | 21:46952006 | synon    | G/G | 6.95E-08    | 58  | 99 | 34 | 96 | 0/0 | 0/0 | 0/0 | match | match | match |
| 198564 | Agilent38MB | 21:46952006 | synon    | G/G | 1.63E-06    | 214 | 99 | 50 | 99 | 0/0 | 0/0 | 0/0 | match | match | match |
| 108971 | TruSeqV2    | 21:46957794 | missense | T/T | 7.22E-07    | 73  | 99 | 11 | 30 | 0/0 | 0/0 | 0/0 | match | match | match |
| 115239 | TruSeqV2    | 21:46957794 | missense | T/T | 0.000692418 | 60  | 99 | 10 | 18 | 0/0 | 0/0 | 0/0 | match | match | match |
| 132306 | Agilent38MB | 21:46957794 | missense | C/C | 4.09E-14    | 24  | 72 | 15 | 45 | 1/1 | 1/1 | 1/1 | match | match | match |
| 163383 | TruSeqV2    | 21:46957794 | missense | C/C | 1.03E-12    | 58  | 99 | 19 | 56 | 1/1 | 1/1 | 1/1 | match | match | match |

|        |             |             |          |     |          |     |    |    |    |     |     |     |       |       |       |
|--------|-------------|-------------|----------|-----|----------|-----|----|----|----|-----|-----|-----|-------|-------|-------|
| 198564 | Agilent38MB | 21:46957794 | missense | T/C | 4.52E-11 | 34  | 99 | 24 | 99 | 0/1 | 0/1 | 0/1 | match | match | match |
| 132306 | Agilent38MB | 21:46961496 | intronic | T/T | 8.88E-16 | 5   | 6  | 29 | 63 | 0/0 | 0/0 | 0/0 | match | match | match |
| 198564 | Agilent38MB | 21:46961496 | intronic | T/T | 3.66E-14 | 2   | 5  | 36 | 92 | 0/0 | 0/0 | 0/0 | match | match | match |
| 108971 | TruSeqV2    | 22:19950235 | synon    | C/T | 3.33E-15 | 214 | 99 | 35 | 99 | 0/1 | 0/1 | 0/1 | match | match | match |
| 115239 | TruSeqV2    | 22:19950235 | synon    | C/T | 4.44E-15 | 150 | 99 | 14 | 99 | 0/1 | 0/1 | 0/1 | match | match | match |
| 132306 | Agilent38MB | 22:19950235 | synon    | C/C | 7.77E-15 | 68  | 99 | 29 | 87 | 0/0 | 0/0 | 0/0 | match | match | match |
| 163383 | TruSeqV2    | 22:19950235 | synon    | T/T | 7.77E-15 | 185 | 99 | 37 | 99 | 1/1 | 1/1 | 1/1 | match | match | match |
| 198564 | Agilent38MB | 22:19950235 | synon    | C/T | 4.00E-15 | 106 | 99 | 36 | 99 | 0/1 | 0/1 | 0/1 | match | match | match |
| 108971 | TruSeqV2    | 22:19951103 | missense | G/G | 4.22E-15 | 65  | 99 | 30 | 87 | 0/0 | 0/0 | 0/0 | match | match | match |
| 115239 | TruSeqV2    | 22:19951103 | missense | G/G | 1.11E-15 | 54  | 99 | 8  | 21 | 0/0 | 0/0 | 0/0 | match | match | match |
| 132306 | Agilent38MB | 22:19951103 | missense | G/G | 2.71E-14 | 89  | 99 | 27 | 75 | 0/0 | 0/0 | 0/0 | match | match | match |
| 163383 | TruSeqV2    | 22:19951103 | missense | G/G | 1.78E-15 | 63  | 99 | 25 | 63 | 0/0 | 0/0 | 0/0 | match | match | match |
| 198564 | Agilent38MB | 22:19951103 | missense | G/G | 3.61E-13 | 240 | 99 | 22 | 54 | 0/0 | 0/0 | 0/0 | match | match | match |
| 108971 | TruSeqV2    | 22:19951237 | synon    | C/C | 1.57E-13 | 135 | 99 | 37 | 93 | 0/0 | 0/0 | 0/0 | match | match | match |
| 115239 | TruSeqV2    | 22:19951237 | synon    | C/C | 3.55E-15 | 84  | 99 | 10 | 24 | 0/0 | 0/0 | 0/0 | match | match | match |
| 132306 | Agilent38MB | 22:19951237 | synon    | C/C | 4.06E-14 | 64  | 99 | 34 | 87 | 0/0 | 0/0 | 0/0 | match | match | match |
| 163383 | TruSeqV2    | 22:19951237 | synon    | C/C | 4.88E-15 | 105 | 99 | 29 | 78 | 0/0 | 0/0 | 0/0 | match | match | match |
| 198564 | Agilent38MB | 22:19951237 | synon    | C/C | 2.22E-15 | 135 | 99 | 32 | 93 | 0/0 | 0/0 | 0/0 | match | match | match |
| 108971 | TruSeqV2    | 22:19951271 | missense | A/G | 1.18E-14 | 115 | 99 | 27 | 99 | 0/1 | 0/1 | 0/1 | match | match | match |
| 115239 | TruSeqV2    | 22:19951271 | missense | A/G | 4.22E-15 | 65  | 99 | 6  | 17 | 0/1 | 0/1 | 0/1 | match | match | match |
| 132306 | Agilent38MB | 22:19951271 | missense | G/G | 4.00E-15 | 42  | 93 | 20 | 60 | 0/0 | 0/0 | 0/0 | match | match | match |
| 163383 | TruSeqV2    | 22:19951271 | missense | A/A | 1.90E-07 | 87  | 99 | 24 | 72 | 1/1 | 1/1 | 1/1 | match | match | match |
| 198564 | Agilent38MB | 22:19951271 | missense | A/G | 5.16E-07 | 94  | 99 | 29 | 99 | 0/1 | 0/1 | 0/1 | match | match | match |
| 108971 | TruSeqV2    | 22:19951804 | synon    | G/G | 5.33E-15 | 111 | 99 | 24 | 69 | 0/0 | 0/0 | 0/0 | match | match | match |
| 115239 | TruSeqV2    | 22:19951804 | synon    | G/G | 4.53E-14 | 78  | 99 | 17 | 39 | 0/0 | 0/0 | 0/0 | match | match | match |
| 132306 | Agilent38MB | 22:19951804 | synon    | G/G | 1.55E-15 | 83  | 99 | 33 | 93 | 0/0 | 0/0 | 0/0 | match | match | match |
| 163383 | TruSeqV2    | 22:19951804 | synon    | G/G | 8.88E-16 | 87  | 99 | 19 | 48 | 0/0 | 0/0 | 0/0 | match | match | match |
| 198564 | Agilent38MB | 22:19951804 | synon    | A/G | 7.75E-14 | 165 | 99 | 35 | 99 | 0/1 | 0/1 | 0/1 | match | match | match |
| 108971 | TruSeqV2    | 22:24323221 | synon    | C/C | 1.06E-13 | 192 | 99 | 32 | 87 | 0/0 | 0/0 | 0/0 | match | match | match |
| 115239 | TruSeqV2    | 22:24323221 | synon    | C/C | 8.22E-15 | 179 | 99 | 40 | 96 | 0/0 | 0/0 | 0/0 | match | match | match |
| 132306 | Agilent38MB | 22:24323221 | synon    | C/C | 6.95E-14 | 329 | 99 | 26 | 69 | 0/0 | 0/0 | 0/0 | match | match | match |
| 163383 | TruSeqV2    | 22:24323221 | synon    | C/C | 1.55E-15 | 134 | 99 | 18 | 42 | 0/0 | 0/0 | 0/0 | match | match | match |
| 198564 | Agilent38MB | 22:24323221 | synon    | C/C | 6.44E-15 | 604 | 99 | 49 | 99 | 0/0 | 0/0 | 0/0 | match | match | match |
| 163383 | TruSeqV2    | 22:24324821 | missense | C/C | 8.88E-16 | 7   | 18 | 1  | 0  | 0/0 | 0/0 | 0/0 | match | match | match |
| 115239 | TruSeqV2    | 22:24325127 | missense | G/G | 8.88E-16 | 85  | 99 | 4  | 9  | 0/0 | 0/0 | 0/0 | match | match | match |
| 132306 | Agilent38MB | 22:24325127 | missense | G/G | 8.88E-16 | 35  | 87 | 11 | 30 | 0/0 | 0/0 | 0/0 | match | match | match |
| 108971 | TruSeqV2    | 22:24376833 | missense | C/C | 8.88E-16 | 122 | 99 | 42 | 99 | 0/0 | 0/0 | 0/0 | match | match | match |
| 132306 | Agilent38MB | 22:24376833 | missense | C/C | 4.44E-16 | 91  | 99 | 25 | 66 | 0/0 | 0/0 | 0/0 | match | match | match |

|        |             |             |          |     |          |     |    |    |    |     |     |     |       |       |       |
|--------|-------------|-------------|----------|-----|----------|-----|----|----|----|-----|-----|-----|-------|-------|-------|
| 163383 | TruSeqV2    | 22:24376833 | missense | C/C | 4.44E-16 | 117 | 99 | 41 | 99 | 0/0 | 0/0 | 0/0 | match | match | match |
| 198564 | Agilent38MB | 22:24376833 | missense | C/C | 7.88E-14 | 86  | 99 | 15 | 39 | 0/0 | 0/0 | 0/0 | match | match | match |
| 108971 | TruSeqV2    | 22:24376845 | missense | C/C | 4.44E-16 | 139 | 99 | 42 | 99 | 0/0 | 0/0 | 0/0 | match | match | match |
| 132306 | Agilent38MB | 22:24376845 | missense | C/C | 6.66E-16 | 110 | 99 | 27 | 42 | 0/0 | 0/0 | 0/0 | match | match | match |
| 163383 | TruSeqV2    | 22:24376845 | missense | C/C | 6.66E-16 | 114 | 99 | 34 | 87 | 0/0 | 0/0 | 0/0 | match | match | match |
| 198564 | Agilent38MB | 22:24376845 | missense | C/C | 6.66E-16 | 97  | 99 | 14 | 36 | 0/0 | 0/0 | 0/0 | match | match | match |
| 108971 | TruSeqV2    | 22:24376996 | synon    | C/C | 6.66E-16 | 67  | 99 | 30 | 90 | 0/0 | 0/0 | 0/0 | match | match | match |
| 132306 | Agilent38MB | 22:24376996 | synon    | C/C | 7.11E-15 | 124 | 99 | 36 | 99 | 0/0 | 0/0 | 0/0 | match | match | match |
| 163383 | TruSeqV2    | 22:24376996 | synon    | C/C | 1.55E-15 | 52  | 99 | 23 | 66 | 0/0 | 0/0 | 0/0 | match | match | match |
| 198564 | Agilent38MB | 22:24376996 | synon    | C/C | 4.44E-16 | 123 | 99 | 18 | 54 | 0/0 | 0/0 | 0/0 | match | match | match |
| 108971 | TruSeqV2    | 22:24379402 | missense | T/T | 1.52E-09 | 105 | 99 | 30 | 84 | 0/0 | 0/0 | 0/0 | match | match | match |
| 132306 | Agilent38MB | 22:24379402 | missense | T/T | 1.02E-08 | 57  | 99 | 27 | 66 | 0/0 | 0/0 | 0/0 | match | match | match |
| 163383 | TruSeqV2    | 22:24379402 | missense | T/T | 7.34E-08 | 90  | 99 | 37 | 99 | 0/0 | 0/0 | 0/0 | match | match | match |
| 198564 | Agilent38MB | 22:24379402 | missense | T/T | 3.97E-07 | 53  | 99 | 22 | 55 | 0/0 | 0/0 | 0/0 | match | match | match |
| 108971 | TruSeqV2    | 22:24381766 | missense | A/A | 1.33E-15 | 163 | 99 | 24 | 54 | 0/0 | 0/0 | 0/0 | match | match | match |
| 132306 | Agilent38MB | 22:24381766 | missense | A/A | 1.33E-15 | 71  | 99 | 30 | 78 | 0/0 | 0/0 | 0/0 | match | match | match |
| 163383 | TruSeqV2    | 22:24381766 | missense | A/A | 3.55E-15 | 144 | 99 | 28 | 75 | 0/0 | 0/0 | 0/0 | match | match | match |
| 198564 | Agilent38MB | 22:24381766 | missense | A/A | 4.44E-16 | 83  | 99 | 19 | 48 | 0/0 | 0/0 | 0/0 | match | match | match |
| 108971 | TruSeqV2    | 22:24384171 | missense | C/C | 6.66E-16 | 183 | 99 | 45 | 99 | 0/0 | 0/0 | 0/0 | match | match | match |
| 132306 | Agilent38MB | 22:24384171 | missense | C/C | 6.66E-16 | 179 | 99 | 23 | 63 | 0/0 | 0/0 | 0/0 | match | match | match |
| 163383 | TruSeqV2    | 22:24384171 | missense | C/C | 6.66E-16 | 136 | 99 | 44 | 99 | 0/0 | 0/0 | 0/0 | match | match | match |
| 198564 | Agilent38MB | 22:24384171 | missense | C/C | 2.66E-15 | 216 | 99 | 23 | 66 | 0/0 | 0/0 | 0/0 | match | match | match |
| 108971 | TruSeqV2    | 22:42522613 | missense | G/G | 3.55E-15 | 240 | 99 | 36 | 99 | 0/0 | 0/0 | 0/0 | match | match | match |
| 115239 | TruSeqV2    | 22:42522613 | missense | C/C | 3.55E-15 | 170 | 99 | 15 | 10 | 1/1 | 1/1 | 1/1 | match | match | match |
| 132306 | Agilent38MB | 22:42522613 | missense | G/C | 5.64E-14 | 18  | 99 | 35 | 99 | 0/1 | 0/1 | 0/1 | match | match | match |
| 163383 | TruSeqV2    | 22:42522613 | missense | C/C | 9.33E-15 | 219 | 99 | 30 | 89 | 1/1 | 1/1 | 1/1 | match | match | match |
| 198564 | Agilent38MB | 22:42522613 | missense | C/C | 2.44E-15 | 32  | 96 | 35 | 99 | 1/1 | 1/1 | 1/1 | match | match | match |
| 108971 | TruSeqV2    | 22:42523533 | fs       | -/- | 4.44E-16 | 348 | 99 | 42 | 99 | 0/0 | 0/0 | 0/0 | match | match | match |
| 115239 | TruSeqV2    | 22:42523533 | fs       | -/- | 2.22E-16 | 348 | 99 | 42 | 99 | 0/0 | 0/0 | 0/0 | match | match | match |
| 132306 | Agilent38MB | 22:42523533 | fs       | -/- | 6.66E-16 | 348 | 99 | 42 | 99 | 0/0 | 0/0 | 0/0 | match | match | match |
| 163383 | TruSeqV2    | 22:42523533 | fs       | -/- | 2.22E-16 | 348 | 99 | 42 | 99 | 0/0 | 0/0 | 0/0 | match | match | match |
| 198564 | Agilent38MB | 22:42523533 | fs       | -/- | 2.22E-16 | 348 | 99 | 42 | 99 | 0/0 | 0/0 | 0/0 | match | match | match |
| 108971 | TruSeqV2    | 22:42523592 | stop     | G/G | 6.65E-13 | 250 | 99 | 32 | 90 | 0/0 | 0/0 | 0/0 | match | match | match |
| 115239 | TruSeqV2    | 22:42523592 | stop     | G/G | 1.04E-14 | 193 | 99 | 9  | 24 | 0/0 | 0/0 | 0/0 | match | match | match |
| 132306 | Agilent38MB | 22:42523592 | stop     | G/G | 7.02E-13 | 89  | 99 | 51 | 99 | 0/0 | 0/0 | 0/0 | match | match | match |
| 163383 | TruSeqV2    | 22:42523592 | stop     | G/G | 1.21E-13 | 227 | 99 | 40 | 99 | 0/0 | 0/0 | 0/0 | match | match | match |
| 198564 | Agilent38MB | 22:42523592 | stop     | G/G | 5.91E-13 | 124 | 99 | 29 | 87 | 0/0 | 0/0 | 0/0 | match | match | match |
| 108971 | TruSeqV2    | 22:42523610 | missense | C/C | 1.73E-12 | 250 | 99 | 43 | 99 | 0/0 | 0/0 | 0/0 | match | match | match |

|        |             |             |          |               |          |     |    |    |    |     |     |     |       |       |       |
|--------|-------------|-------------|----------|---------------|----------|-----|----|----|----|-----|-----|-----|-------|-------|-------|
| 115239 | TruSeqV2    | 22:42523610 | missense | C/C           | 4.44E-16 | 181 | 99 | 14 | 36 | 0/0 | 0/0 | 0/0 | match | match | match |
| 132306 | Agilent38MB | 22:42523610 | missense | C/C           | 6.66E-16 | 82  | 99 | 56 | 99 | 0/0 | 0/0 | 0/0 | match | match | match |
| 163383 | TruSeqV2    | 22:42523610 | missense | C/C           | 4.44E-16 | 238 | 99 | 38 | 99 | 0/0 | 0/0 | 0/0 | match | match | match |
| 198564 | Agilent38MB | 22:42523610 | missense | C/C           | 6.37E-14 | 139 | 99 | 39 | 96 | 0/0 | 0/0 | 0/0 | match | match | match |
| 108971 | TruSeqV2    | 22:42523805 | intronic | T/C           | 7.35E-14 | 95  | 99 | 35 | 99 | 0/1 | 0/1 | 0/1 | match | match | match |
| 115239 | TruSeqV2    | 22:42523805 | intronic | C/C           | 1.23E-13 | 73  | 99 | 9  | 21 | 0/0 | 0/0 | 0/0 | match | match | match |
| 132306 | Agilent38MB | 22:42523805 | intronic | C/C           | 2.33E-11 | 32  | 93 | 21 | 60 | 0/0 | 0/0 | 0/0 | match | match | match |
| 163383 | TruSeqV2    | 22:42523805 | intronic | C/C           | 3.76E-09 | 74  | 99 | 29 | 78 | 0/0 | 0/0 | 0/0 | match | match | match |
| 198564 | Agilent38MB | 22:42523805 | intronic | C/C           | 2.48E-07 | 51  | 99 | 40 | 99 | 0/0 | 0/0 | 0/0 | match | match | match |
| 108971 | TruSeqV2    | 22:42523843 | splice   | C/C           | 6.66E-16 | 103 | 99 | 38 | 96 | 0/0 | 0/0 | 0/0 | match | match | match |
| 115239 | TruSeqV2    | 22:42523843 | splice   | C/C           | 2.22E-16 | 85  | 99 | 14 | 36 | 0/0 | 0/0 | 0/0 | match | match | match |
| 132306 | Agilent38MB | 22:42523843 | splice   | C/C           | 2.22E-16 | 52  | 99 | 29 | 87 | 0/0 | 0/0 | 0/0 | match | match | match |
| 163383 | TruSeqV2    | 22:42523843 | splice   | C/C           | 4.44E-15 | 81  | 99 | 36 | 93 | 0/0 | 0/0 | 0/0 | match | match | match |
| 198564 | Agilent38MB | 22:42523843 | splice   | C/C           | 1.11E-15 | 103 | 99 | 40 | 99 | 0/0 | 0/0 | 0/0 | match | match | match |
| 108971 | TruSeqV2    | 22:42523858 | missense | T/T           | 4.44E-16 | 105 | 99 | 36 | 90 | 0/0 | 0/0 | 0/0 | match | match | match |
| 115239 | TruSeqV2    | 22:42523858 | missense | T/T           | 4.44E-16 | 87  | 99 | 11 | 24 | 0/0 | 0/0 | 0/0 | match | match | match |
| 132306 | Agilent38MB | 22:42523858 | missense | T/T           | 8.88E-16 | 62  | 99 | 30 | 78 | 0/0 | 0/0 | 0/0 | match | match | match |
| 163383 | TruSeqV2    | 22:42523858 | missense | T/T           | 8.88E-16 | 92  | 99 | 34 | 90 | 0/0 | 0/0 | 0/0 | match | match | match |
| 198564 | Agilent38MB | 22:42523858 | missense | T/T           | 2.89E-15 | 105 | 99 | 42 | 93 | 0/0 | 0/0 | 0/0 | match | match | match |
| 108971 | TruSeqV2    | 22:42523943 | missense | A/A           | 8.88E-16 | 180 | 99 | 44 | 99 | 0/0 | 0/0 | 0/0 | match | match | match |
| 132306 | Agilent38MB | 22:42523943 | missense | G/G           | 2.22E-16 | 27  | 81 | 40 | 99 | 1/1 | 1/1 | 1/1 | match | match | match |
| 163383 | TruSeqV2    | 22:42523943 | missense | G/G           | 2.22E-16 | 128 | 99 | 37 | 99 | 1/1 | 1/1 | 1/1 | match | match | match |
| 198564 | Agilent38MB | 22:42523943 | missense | G/G           | 6.66E-16 | 59  | 99 | 39 | 99 | 1/1 | 1/1 | 1/1 | match | match | match |
| 108971 | TruSeqV2    | 22:42524178 | missense | AGA/AGA       | 2.24E-13 | 88  | 99 | 34 | 90 | 0/0 | 0/0 | 0/0 | match | match | match |
| 115239 | TruSeqV2    | 22:42524178 | missense | AGA/AGA       | 7.66E-14 | 88  | 99 | 34 | 90 | 0/0 | 0/0 | 0/0 | match | match | match |
| 132306 | Agilent38MB | 22:42524178 | missense | AGA/AGA       | 1.21E-13 | 88  | 99 | 34 | 90 | 0/0 | 0/0 | 0/0 | match | match | match |
| 163383 | TruSeqV2    | 22:42524178 | missense | AGA/AGA       | 3.95E-14 | 88  | 99 | 34 | 90 | 0/0 | 0/0 | 0/0 | match | match | match |
| 198564 | Agilent38MB | 22:42524178 | missense | AGA/AGA       | 7.29E-13 | 88  | 99 | 34 | 90 | 0/0 | 0/0 | 0/0 | match | match | match |
| 108971 | TruSeqV2    | 22:42524203 | missense | GACT/GAC<br>T | 1.49E-14 | 84  | 99 | 32 | 84 | 0/0 | 0/0 | 0/0 | match | match | match |
| 115239 | TruSeqV2    | 22:42524203 | missense | GACT/GAC<br>T | 8.88E-16 | 84  | 99 | 32 | 84 | 0/0 | 0/0 | 0/0 | match | match | match |
| 132306 | Agilent38MB | 22:42524203 | missense | GACT/GAC<br>T | 4.00E-15 | 84  | 99 | 32 | 84 | 0/0 | 0/0 | 0/0 | match | match | match |
| 163383 | TruSeqV2    | 22:42524203 | missense | GACT/GAC<br>T | 3.55E-15 | 84  | 99 | 32 | 84 | 0/0 | 0/0 | 0/0 | match | match | match |
| 198564 | Agilent38MB | 22:42524203 | missense | GACT/GAC<br>T | 4.59E-09 | 84  | 99 | 32 | 84 | 0/0 | 0/0 | 0/0 | match | match | match |

|        |             |             |           |          |          |     |    |    |    |     |     |     |       |       |       |
|--------|-------------|-------------|-----------|----------|----------|-----|----|----|----|-----|-----|-----|-------|-------|-------|
| 108971 | TruSeqV2    | 22:42524213 | fs        | -/-      | 7.26E-07 | 91  | 99 | 31 | 78 | 0/0 | 0/0 | 0/0 | match | match | match |
| 115239 | TruSeqV2    | 22:42524213 | fs        | -/-      | 5.89E-06 | 91  | 99 | 31 | 78 | 0/0 | 0/0 | 0/0 | match | match | match |
| 132306 | Agilent38MB | 22:42524213 | fs        | -/-      | 1.55E-05 | 91  | 99 | 31 | 78 | 0/0 | 0/0 | 0/0 | match | match | match |
| 163383 | TruSeqV2    | 22:42524213 | fs        | -/-      | 5.76E-05 | 91  | 99 | 31 | 78 | 0/0 | 0/0 | 0/0 | match | match | match |
| 108971 | TruSeqV2    | 22:42524244 | fs        | A/A      | 2.22E-16 | 135 | 99 | 34 | 93 | 0/0 | 0/0 | 0/0 | match | match | match |
| 132306 | Agilent38MB | 22:42524244 | fs        | A/A      | 2.22E-16 | 135 | 99 | 34 | 93 | 0/0 | 0/0 | 0/0 | match | match | match |
| 163383 | TruSeqV2    | 22:42524244 | fs        | A/A      | 2.22E-16 | 135 | 99 | 34 | 93 | 0/0 | 0/0 | 0/0 | match | match | match |
|        |             |             |           | AACT/AAC |          |     |    |    |    |     |     |     |       |       |       |
| 108971 | TruSeqV2    | 22:42524251 | fs        | T        | 2.22E-16 | 142 | 99 | 35 | 99 | 0/0 | 0/0 | 0/0 | match | match | match |
|        |             |             |           | AACT/AAC |          |     |    |    |    |     |     |     |       |       |       |
| 115239 | TruSeqV2    | 22:42524251 | fs        | T        | 2.22E-16 | 142 | 99 | 35 | 99 | 0/0 | 0/0 | 0/0 | match | match | match |
|        |             |             |           | AACT/AAC |          |     |    |    |    |     |     |     |       |       |       |
| 132306 | Agilent38MB | 22:42524251 | fs        | T        | 2.22E-16 | 142 | 99 | 35 | 99 | 0/0 | 0/0 | 0/0 | match | match | match |
|        |             |             |           | AACT/AAC |          |     |    |    |    |     |     |     |       |       |       |
| 163383 | TruSeqV2    | 22:42524251 | fs        | T        | 2.22E-16 | 142 | 99 | 35 | 99 | 0/0 | 0/0 | 0/0 | match | match | match |
|        |             |             |           | AACT/AAC |          |     |    |    |    |     |     |     |       |       |       |
| 198564 | Agilent38MB | 22:42524251 | fs        | T        | 2.22E-16 | 142 | 99 | 35 | 99 | 0/0 | 0/0 | 0/0 | match | match | match |
| 108971 | TruSeqV2    | 22:42524819 | fs        | -/-      | 4.44E-16 | 215 | 99 | 22 | 66 | 0/0 | 0/0 | 0/0 | match | match | match |
| 115239 | TruSeqV2    | 22:42524819 | fs        | -/-      | 6.66E-16 | 215 | 99 | 22 | 66 | 0/0 | 0/0 | 0/0 | match | match | match |
| 132306 | Agilent38MB | 22:42524819 | fs        | -/-      | 4.44E-16 | 215 | 99 | 22 | 66 | 0/0 | 0/0 | 0/0 | match | match | match |
| 163383 | TruSeqV2    | 22:42524819 | fs        | -/-      | 4.44E-16 | 215 | 99 | 22 | 66 | 0/0 | 0/0 | 0/0 | match | match | match |
| 198564 | Agilent38MB | 22:42524819 | fs        | -/-      | 1.11E-15 | 215 | 99 | 22 | 66 | 0/0 | 0/0 | 0/0 | match | match | match |
| 108971 | TruSeqV2    | 22:42524929 | missense  | -/-      | 6.66E-16 | 307 | 99 | 35 | 90 | 0/0 | 0/0 | 0/0 | match | match | match |
| 115239 | TruSeqV2    | 22:42524929 | missense  | -/-      | 6.66E-16 | 307 | 99 | 35 | 90 | 0/0 | 0/0 | 0/0 | match | match | match |
| 132306 | Agilent38MB | 22:42524929 | missense  | -/-      | 6.66E-16 | 307 | 99 | 35 | 90 | 0/0 | 0/0 | 0/0 | match | match | match |
| 163383 | TruSeqV2    | 22:42524929 | missense  | -/-      | 1.11E-15 | 307 | 99 | 35 | 90 | 0/0 | 0/0 | 0/0 | match | match | match |
| 198564 | Agilent38MB | 22:42524929 | missense  | -/-      | 6.66E-16 | 307 | 99 | 35 | 90 | 0/0 | 0/0 | 0/0 | match | match | match |
| 108971 | TruSeqV2    | 22:42524947 | splice    | C/C      | 8.22E-15 | 340 | 99 | 30 | 72 | 0/0 | 0/0 | 0/0 | match | match | match |
| 115239 | TruSeqV2    | 22:42524947 | splice    | C/C      | 2.44E-15 | 223 | 99 | 9  | 27 | 0/0 | 0/0 | 0/0 | match | match | match |
| 132306 | Agilent38MB | 22:42524947 | splice    | T/C      | 3.93E-13 | 5   | 50 | 25 | 99 | 0/1 | 0/1 | 0/1 | match | match | match |
| 163383 | TruSeqV2    | 22:42524947 | splice    | C/C      | 1.64E-14 | 244 | 99 | 19 | 48 | 0/0 | 0/0 | 0/0 | match | match | match |
| 198564 | Agilent38MB | 22:42524947 | splice    | C/C      | 2.22E-13 | 15  | 33 | 28 | 75 | 0/0 | 0/0 | 0/0 | match | match | match |
| 108971 | TruSeqV2    | 22:42525035 | stop/miss | C/C      | 6.66E-16 | 358 | 99 | 31 | 72 | 0/0 | 0/0 | 0/0 | match | match | match |
| 115239 | TruSeqV2    | 22:42525035 | stop/miss | C/C      | 4.44E-16 | 253 | 99 | 7  | 18 | 0/0 | 0/0 | 0/0 | match | match | match |
| 163383 | TruSeqV2    | 22:42525035 | stop/miss | C/C      | 1.11E-15 | 277 | 99 | 29 | 50 | 0/0 | 0/0 | 0/0 | match | match | match |
| 108971 | TruSeqV2    | 22:42525086 | fs        | T/T      | 9.58E-09 | 364 | 99 | 33 | 93 | 0/0 | 0/0 | 0/0 | match | match | match |
| 115239 | TruSeqV2    | 22:42525086 | fs        | T/T      | 4.45E-12 | 364 | 99 | 33 | 93 | 0/0 | 0/0 | 0/0 | match | match | match |
| 132306 | Agilent38MB | 22:42525086 | fs        | T/T      | 6.36E-09 | 364 | 99 | 33 | 93 | 0/0 | 0/0 | 0/0 | match | match | match |

|        |             |             |          |     |            |     |    |    |    |     |     |     |       |       |       |
|--------|-------------|-------------|----------|-----|------------|-----|----|----|----|-----|-----|-----|-------|-------|-------|
| 163383 | TruSeqV2    | 22:42525086 | fs       | T/T | 2.98E-10   | 364 | 99 | 33 | 93 | 0/0 | 0/0 | 0/0 | match | match | match |
| 198564 | Agilent38MB | 22:42525086 | fs       | T/T | 1.10E-05   | 364 | 99 | 33 | 93 | 0/0 | 0/0 | 0/0 | match | match | match |
| 108971 | TruSeqV2    | 22:42525132 | synon    | G/G | 3.78E-09   | 312 | 99 | 35 | 99 | 0/0 | 0/0 | 0/0 | match | match | match |
| 163383 | TruSeqV2    | 22:42525132 | synon    | C/C | 6.99E-14   | 197 | 99 | 25 | 75 | 1/1 | 1/1 | 1/1 | match | match | match |
| 108971 | TruSeqV2    | 22:42525134 | missense | C/C | 1.11E-15   | 302 | 99 | 34 | 99 | 0/0 | 0/0 | 0/0 | match | match | match |
| 132306 | Agilent38MB | 22:42525134 | missense | C/C | 1.72E-07   | 1   | 3  | 31 | 75 | 0/0 | 0/0 | 0/0 | match | match | match |
| 163383 | TruSeqV2    | 22:42525134 | missense | C/C | 0.00066448 | 194 | 99 | 25 | 57 | 0/0 | 0/0 | 0/0 | match | match | match |
| 108971 | TruSeqV2    | 22:42525772 | missense | G/G | 6.88E-15   | 26  | 75 | 20 | 59 | 0/0 | 0/0 | 0/0 | match | match | match |
| 115239 | TruSeqV2    | 22:42525772 | missense | G/G | 4.66E-15   | 7   | 18 | 5  | 12 | 0/0 | 0/0 | 0/0 | match | match | match |
| 132306 | Agilent38MB | 22:42525772 | missense | G/G | 8.22E-15   | 23  | 57 | 8  | 21 | 0/0 | 0/0 | 0/0 | match | match | match |
| 163383 | TruSeqV2    | 22:42525772 | missense | G/G | 1.18E-14   | 12  | 33 | 11 | 30 | 0/0 | 0/0 | 0/0 | match | match | match |
| 198564 | Agilent38MB | 22:42525772 | missense | G/G | 3.65E-13   | 42  | 99 | 17 | 48 | 0/0 | 0/0 | 0/0 | match | match | match |
| 108971 | TruSeqV2    | 22:42525912 | splice   | C/C | 8.88E-16   | 7   | 9  | 3  | 9  | 0/0 | 0/0 | 0/0 | match | match | match |
| 198564 | Agilent38MB | 22:42525912 | splice   | C/C | 8.88E-16   | 7   | 12 | 4  | 9  | 0/0 | 0/0 | 0/0 | match | match | match |
| 108971 | TruSeqV2    | 22:42526657 | fs       | T/T | 1.33E-15   | 66  | 99 | 34 | 90 | 0/0 | 0/0 | 0/0 | match | match | match |
| 115239 | TruSeqV2    | 22:42526657 | fs       | T/T | 1.11E-15   | 66  | 99 | 34 | 90 | 0/0 | 0/0 | 0/0 | match | match | match |
| 132306 | Agilent38MB | 22:42526657 | fs       | T/T | 2.13E-12   | 66  | 99 | 34 | 90 | 0/0 | 0/0 | 0/0 | match | match | match |
| 163383 | TruSeqV2    | 22:42526657 | fs       | T/T | 4.19E-13   | 66  | 99 | 34 | 90 | 0/0 | 0/0 | 0/0 | match | match | match |
| 198564 | Agilent38MB | 22:42526657 | fs       | T/T | 5.32E-13   | 66  | 99 | 34 | 90 | 0/0 | 0/0 | 0/0 | match | match | match |
| 108971 | TruSeqV2    | 22:42526670 | missense | C/C | 8.88E-16   | 76  | 99 | 35 | 96 | 0/0 | 0/0 | 0/0 | match | match | match |
| 115239 | TruSeqV2    | 22:42526670 | missense | C/C | 2.22E-16   | 67  | 99 | 18 | 45 | 0/0 | 0/0 | 0/0 | match | match | match |
| 132306 | Agilent38MB | 22:42526670 | missense | C/C | 4.44E-15   | 50  | 93 | 46 | 99 | 0/0 | 0/0 | 0/0 | match | match | match |
| 163383 | TruSeqV2    | 22:42526670 | missense | C/C | 1.11E-15   | 71  | 99 | 33 | 90 | 0/0 | 0/0 | 0/0 | match | match | match |
| 198564 | Agilent38MB | 22:42526670 | missense | C/C | 4.66E-15   | 43  | 99 | 43 | 99 | 0/0 | 0/0 | 0/0 | match | match | match |
| 108971 | TruSeqV2    | 22:42526694 | missense | G/G | 4.44E-15   | 86  | 99 | 25 | 63 | 0/0 | 0/0 | 0/0 | match | match | match |
| 115239 | TruSeqV2    | 22:42526694 | missense | G/G | 5.55E-15   | 61  | 99 | 19 | 45 | 0/0 | 0/0 | 0/0 | match | match | match |
| 132306 | Agilent38MB | 22:42526694 | missense | G/A | 6.04E-14   | 24  | 99 | 31 | 92 | 0/1 | 0/1 | 0/1 | match | match | match |
| 163383 | TruSeqV2    | 22:42526694 | missense | G/G | 2.26E-14   | 82  | 99 | 32 | 75 | 0/0 | 0/0 | 0/0 | match | match | match |
| 198564 | Agilent38MB | 22:42526694 | missense | G/G | 2.80E-13   | 38  | 84 | 38 | 96 | 0/0 | 0/0 | 0/0 | match | match | match |
| 198564 | Agilent38MB | 22:42528382 | promoter | G/G | 1.33E-15   | 1   | 3  | 41 | 99 | 1/1 | 1/1 | 1/1 | match | match | match |
| 108971 | TruSeqV2    | 22:42528568 | promoter | T/T | 9.10E-15   | 4   | 12 | 24 | 69 | 0/0 | 0/0 | 0/0 | match | match | match |
| 132306 | Agilent38MB | 22:42528568 | promoter | C/C | 2.41E-12   | 2   | 6  | 44 | 99 | 1/1 | 1/1 | 1/1 | match | match | match |
| 163383 | TruSeqV2    | 22:42528568 | promoter | C/C | 8.82E-09   | 6   | 18 | 30 | 90 | 1/1 | 1/1 | 1/1 | match | match | match |
| 108971 | TruSeqV2    | 22:42528759 | promoter | G/G | 1.47E-14   | 5   | 15 | 37 | 87 | 0/0 | 0/0 | 0/0 | match | match | match |
| 115239 | TruSeqV2    | 22:42528759 | promoter | G/G | 3.89E-14   | 4   | 9  | 21 | 60 | 0/0 | 0/0 | 0/0 | match | match | match |
| 132306 | Agilent38MB | 22:42528759 | promoter | G/G | 5.33E-15   | 3   | 6  | 47 | 99 | 0/0 | 0/0 | 0/0 | match | match | match |
| 163383 | TruSeqV2    | 22:42528759 | promoter | G/G | 4.66E-15   | 6   | 12 | 46 | 99 | 0/0 | 0/0 | 0/0 | match | match | match |
| 198564 | Agilent38MB | 22:42528759 | promoter | G/G | 6.66E-16   | 8   | 18 | 45 | 99 | 0/0 | 0/0 | 0/0 | match | match | match |

|        |             |             |          |     |          |     |    |    |    |     |     |     |       |       |       |
|--------|-------------|-------------|----------|-----|----------|-----|----|----|----|-----|-----|-----|-------|-------|-------|
| 108971 | TruSeqV2    | 22:42528976 | promoter | C/C | 1.55E-15 | 1   | 3  | 30 | 81 | 0/0 | 0/0 | 0/0 | match | match | match |
| 132306 | Agilent38MB | 22:42528976 | promoter | T/C | 6.96E-11 | 10  | 79 | 39 | 99 | 0/1 | 0/1 | 0/1 | match | match | match |
| 163383 | TruSeqV2    | 22:42528976 | promoter | C/C | 1.33E-15 | 2   | 6  | 28 | 75 | 0/0 | 0/0 | 0/0 | match | match | match |
| 198564 | Agilent38MB | 22:42528976 | promoter | C/C | 1.33E-15 | 23  | 60 | 26 | 58 | 0/0 | 0/0 | 0/0 | match | match | match |
| 108971 | TruSeqV2    | 22:44220673 | 3'UTR    | C/A | 3.13E-14 | 152 | 99 | 31 | 99 | 0/1 | 0/1 | 0/1 | match | match | match |
| 115239 | TruSeqV2    | 22:44220673 | 3'UTR    | C/C | 8.88E-16 | 114 | 99 | 18 | 51 | 0/0 | 0/0 | 0/0 | match | match | match |
| 163383 | TruSeqV2    | 22:44220673 | 3'UTR    | C/C | 1.07E-14 | 181 | 99 | 38 | 90 | 0/0 | 0/0 | 0/0 | match | match | match |
| 108971 | TruSeqV2    | 22:44221247 | 3'UTR    | G/A | 6.15E-14 | 103 | 99 | 37 | 99 | 0/1 | 0/1 | 0/1 | match | match | match |
| 115239 | TruSeqV2    | 22:44221247 | 3'UTR    | A/A | 2.00E-15 | 71  | 99 | 30 | 4  | 0/0 | 0/0 | 0/0 | match | match | match |
| 163383 | TruSeqV2    | 22:44221247 | 3'UTR    | A/A | 1.09E-14 | 77  | 99 | 30 | 84 | 0/0 | 0/0 | 0/0 | match | match | match |
| 198564 | Agilent38MB | 22:44221247 | 3'UTR    | A/A | 1.78E-15 | 3   | 6  | 33 | 96 | 0/0 | 0/0 | 0/0 | match | match | match |
| 108971 | TruSeqV2    | 22:44221471 | 3'UTR    | C/C | 2.22E-16 | 112 | 99 | 50 | 99 | 0/0 | 0/0 | 0/0 | match | match | match |
| 115239 | TruSeqV2    | 22:44221471 | 3'UTR    | C/C | 2.22E-16 | 83  | 99 | 27 | 81 | 0/0 | 0/0 | 0/0 | match | match | match |
| 163383 | TruSeqV2    | 22:44221471 | 3'UTR    | C/C | 4.44E-16 | 125 | 99 | 42 | 96 | 0/0 | 0/0 | 0/0 | match | match | match |
| 108971 | TruSeqV2    | 22:44234791 | missense | C/C | 8.88E-16 | 181 | 99 | 60 | 99 | 0/0 | 0/0 | 0/0 | match | match | match |
| 115239 | TruSeqV2    | 22:44234791 | missense | C/C | 8.88E-16 | 123 | 99 | 36 | 99 | 0/0 | 0/0 | 0/0 | match | match | match |
| 132306 | Agilent38MB | 22:44234791 | missense | C/C | 2.66E-15 | 82  | 99 | 34 | 90 | 0/0 | 0/0 | 0/0 | match | match | match |
| 163383 | TruSeqV2    | 22:44234791 | missense | C/C | 6.66E-16 | 125 | 99 | 55 | 99 | 0/0 | 0/0 | 0/0 | match | match | match |
| 198564 | Agilent38MB | 22:44234791 | missense | C/C | 6.66E-16 | 149 | 99 | 62 | 99 | 0/0 | 0/0 | 0/0 | match | match | match |
| 108971 | TruSeqV2    | 22:44235828 | missense | G/G | 7.99E-15 | 223 | 99 | 30 | 81 | 0/0 | 0/0 | 0/0 | match | match | match |
| 115239 | TruSeqV2    | 22:44235828 | missense | G/G | 6.44E-15 | 149 | 99 | 25 | 66 | 0/0 | 0/0 | 0/0 | match | match | match |
| 132306 | Agilent38MB | 22:44235828 | missense | G/G | 6.44E-15 | 16  | 45 | 32 | 90 | 0/0 | 0/0 | 0/0 | match | match | match |
| 163383 | TruSeqV2    | 22:44235828 | missense | G/G | 5.55E-15 | 167 | 99 | 31 | 84 | 0/0 | 0/0 | 0/0 | match | match | match |
| 198564 | Agilent38MB | 22:44235828 | missense | G/G | 2.91E-14 | 29  | 72 | 28 | 81 | 0/0 | 0/0 | 0/0 | match | match | match |
| 108971 | TruSeqV2    | 22:51064039 | missense | G/G | 1.78E-15 | 124 | 99 | 42 | 99 | 0/0 | 0/0 | 0/0 | match | match | match |
| 115239 | TruSeqV2    | 22:51064039 | missense | C/C | 3.77E-15 | 93  | 99 | 10 | 30 | 1/1 | 1/1 | 1/1 | match | match | match |
| 132306 | Agilent38MB | 22:51064039 | missense | G/G | 5.77E-15 | 57  | 99 | 35 | 93 | 0/0 | 0/0 | 0/0 | match | match | match |
| 163383 | TruSeqV2    | 22:51064039 | missense | G/G | 2.22E-15 | 97  | 99 | 33 | 90 | 0/0 | 0/0 | 0/0 | match | match | match |
| 198564 | Agilent38MB | 22:51064039 | missense | G/G | 3.66E-14 | 105 | 99 | 43 | 99 | 0/0 | 0/0 | 0/0 | match | match | match |
| 108971 | TruSeqV2    | 22:51064399 | missense | A/A | 1.11E-15 | 147 | 99 | 32 | 87 | 0/0 | 0/0 | 0/0 | match | match | match |
| 115239 | TruSeqV2    | 22:51064399 | missense | A/A | 1.44E-14 | 80  | 99 | 15 | 42 | 0/0 | 0/0 | 0/0 | match | match | match |
| 132306 | Agilent38MB | 22:51064399 | missense | A/A | 2.89E-15 | 8   | 15 | 36 | 96 | 0/0 | 0/0 | 0/0 | match | match | match |
| 163383 | TruSeqV2    | 22:51064399 | missense | A/A | 1.11E-14 | 89  | 99 | 40 | 99 | 0/0 | 0/0 | 0/0 | match | match | match |
| 198564 | Agilent38MB | 22:51064399 | missense | A/A | 7.77E-15 | 11  | 30 | 40 | 99 | 0/0 | 0/0 | 0/0 | match | match | match |
| 108971 | TruSeqV2    | 22:51064699 | missense | T/T | 6.44E-15 | 101 | 99 | 32 | 81 | 0/0 | 0/0 | 0/0 | match | match | match |
| 115239 | TruSeqV2    | 22:51064699 | missense | T/T | 6.44E-15 | 80  | 99 | 19 | 40 | 0/0 | 0/0 | 0/0 | match | match | match |
| 132306 | Agilent38MB | 22:51064699 | missense | T/T | 4.22E-15 | 29  | 87 | 36 | 99 | 0/0 | 0/0 | 0/0 | match | match | match |
| 163383 | TruSeqV2    | 22:51064699 | missense | T/T | 3.33E-15 | 97  | 99 | 43 | 99 | 0/0 | 0/0 | 0/0 | match | match | match |



|        |             |             |          |     |          |     |    |    |    |     |     |     |       |       |       |
|--------|-------------|-------------|----------|-----|----------|-----|----|----|----|-----|-----|-----|-------|-------|-------|
| 198564 | Agilent38MB | 22:51064699 | missense | T/T | 1.51E-13 | 63  | 99 | 50 | 99 | 0/0 | 0/0 | 0/0 | match | match | match |
| 108971 | TruSeqV2    | 22:51065808 | missense | G/G | 6.66E-16 | 30  | 78 | 41 | 96 | 0/0 | 0/0 | 0/0 | match | match | match |
| 115239 | TruSeqV2    | 22:51065808 | missense | G/G | 3.62E-14 | 13  | 33 | 7  | 18 | 0/0 | 0/0 | 0/0 | match | match | match |
| 132306 | Agilent38MB | 22:51065808 | missense | G/G | 4.44E-16 | 8   | 23 | 20 | 54 | 0/0 | 0/0 | 0/0 | match | match | match |
| 163383 | TruSeqV2    | 22:51065808 | missense | G/G | 4.44E-16 | 25  | 69 | 31 | 90 | 0/0 | 0/0 | 0/0 | match | match | match |
| 198564 | Agilent38MB | 22:51065808 | missense | G/G | 5.52E-13 | 18  | 48 | 29 | 75 | 0/0 | 0/0 | 0/0 | match | match | match |
| 108971 | TruSeqV2    | 3:119500035 | 5'UTR    | C/C | 8.88E-16 | 59  | 99 | 40 | 99 | 0/0 | 0/0 | 0/0 | match | match | match |
| 115239 | TruSeqV2    | 3:119500035 | 5'UTR    | T/T | 4.88E-15 | 47  | 15 | 42 | 83 | 1/1 | 1/1 | 1/1 | match | match | match |
| 163383 | TruSeqV2    | 3:119500035 | 5'UTR    | C/T | 1.82E-14 | 68  | 99 | 39 | 99 | 0/1 | 0/1 | 0/1 | match | match | match |
| 198564 | Agilent38MB | 3:119500035 | 5'UTR    | C/C | 2.00E-14 | 1   | 3  | 49 | 99 | 0/0 | 0/0 | 0/0 | match | match | match |
| 108971 | TruSeqV2    | 3:119526131 | missense | G/G | 2.22E-16 | 209 | 99 | 38 | 99 | 0/0 | 0/0 | 0/0 | match | match | match |
| 115239 | TruSeqV2    | 3:119526131 | missense | G/G | 2.22E-16 | 138 | 99 | 40 | 99 | 0/0 | 0/0 | 0/0 | match | match | match |
| 132306 | Agilent38MB | 3:119526131 | missense | G/G | 6.66E-16 | 41  | 99 | 33 | 87 | 0/0 | 0/0 | 0/0 | match | match | match |
| 163383 | TruSeqV2    | 3:119526131 | missense | G/G | 2.22E-16 | 135 | 99 | 35 | 99 | 0/0 | 0/0 | 0/0 | match | match | match |
| 198564 | Agilent38MB | 3:119526131 | missense | G/G | 1.11E-15 | 97  | 99 | 39 | 99 | 0/0 | 0/0 | 0/0 | match | match | match |
| 108971 | TruSeqV2    | 3:119526176 | missense | C/C | 2.22E-16 | 238 | 99 | 34 | 86 | 0/0 | 0/0 | 0/0 | match | match | match |
| 115239 | TruSeqV2    | 3:119526176 | missense | C/C | 2.22E-16 | 160 | 99 | 44 | 99 | 0/0 | 0/0 | 0/0 | match | match | match |
| 132306 | Agilent38MB | 3:119526176 | missense | C/C | 2.22E-16 | 57  | 99 | 40 | 99 | 0/0 | 0/0 | 0/0 | match | match | match |
| 163383 | TruSeqV2    | 3:119526176 | missense | C/C | 2.22E-16 | 152 | 99 | 38 | 99 | 0/0 | 0/0 | 0/0 | match | match | match |
| 198564 | Agilent38MB | 3:119526176 | missense | C/C | 2.44E-15 | 100 | 99 | 42 | 99 | 0/0 | 0/0 | 0/0 | match | match | match |
| 108971 | TruSeqV2    | 3:119526203 | missense | G/G | 5.33E-15 | 229 | 99 | 39 | 96 | 0/0 | 0/0 | 0/0 | match | match | match |
| 132306 | Agilent38MB | 3:119526203 | missense | G/G | 6.66E-16 | 81  | 99 | 43 | 99 | 0/0 | 0/0 | 0/0 | match | match | match |
| 163383 | TruSeqV2    | 3:119526203 | missense | G/G | 1.11E-15 | 155 | 99 | 46 | 99 | 0/0 | 0/0 | 0/0 | match | match | match |
| 198564 | Agilent38MB | 3:119526203 | missense | G/G | 2.24E-14 | 156 | 99 | 41 | 99 | 0/0 | 0/0 | 0/0 | match | match | match |
| 108971 | TruSeqV2    | 3:119529002 | missense | C/C | 1.11E-15 | 50  | 99 | 53 | 99 | 0/0 | 0/0 | 0/0 | match | match | match |
| 115239 | TruSeqV2    | 3:119529002 | missense | C/C | 4.44E-16 | 49  | 99 | 9  | 24 | 0/0 | 0/0 | 0/0 | match | match | match |
| 132306 | Agilent38MB | 3:119529002 | missense | C/C | 6.66E-16 | 11  | 24 | 39 | 97 | 0/0 | 0/0 | 0/0 | match | match | match |
| 163383 | TruSeqV2    | 3:119529002 | missense | C/C | 4.44E-16 | 46  | 99 | 46 | 99 | 0/0 | 0/0 | 0/0 | match | match | match |
| 198564 | Agilent38MB | 3:119529002 | missense | C/C | 1.71E-14 | 22  | 45 | 56 | 99 | 0/0 | 0/0 | 0/0 | match | match | match |
| 108971 | TruSeqV2    | 3:119530419 | missense | G/G | 6.66E-16 | 163 | 99 | 26 | 60 | 0/0 | 0/0 | 0/0 | match | match | match |
| 115239 | TruSeqV2    | 3:119530419 | missense | G/G | 2.22E-16 | 141 | 99 | 12 | 12 | 0/0 | 0/0 | 0/0 | match | match | match |
| 132306 | Agilent38MB | 3:119530419 | missense | G/G | 2.22E-16 | 33  | 81 | 33 | 69 | 0/0 | 0/0 | 0/0 | match | match | match |
| 163383 | TruSeqV2    | 3:119530419 | missense | G/G | 2.22E-16 | 157 | 99 | 27 | 48 | 0/0 | 0/0 | 0/0 | match | match | match |
| 198564 | Agilent38MB | 3:119530419 | missense | G/G | 1.11E-15 | 81  | 99 | 33 | 81 | 0/0 | 0/0 | 0/0 | match | match | match |
| 108971 | TruSeqV2    | 3:119530472 | missense | G/G | 5.65E-11 | 248 | 99 | 33 | 99 | 0/0 | 0/0 | 0/0 | match | match | match |
| 115239 | TruSeqV2    | 3:119530472 | missense | G/G | 1.94E-09 | 188 | 99 | 13 | 36 | 0/0 | 0/0 | 0/0 | match | match | match |
| 132306 | Agilent38MB | 3:119530472 | missense | G/G | 1.37E-10 | 35  | 87 | 30 | 87 | 0/0 | 0/0 | 0/0 | match | match | match |
| 163383 | TruSeqV2    | 3:119530472 | missense | G/G | 5.09E-09 | 184 | 99 | 21 | 60 | 0/0 | 0/0 | 0/0 | match | match | match |

|        |             |             |          |     |          |     |    |    |    |     |     |     |       |       |       |
|--------|-------------|-------------|----------|-----|----------|-----|----|----|----|-----|-----|-----|-------|-------|-------|
| 198564 | Agilent38MB | 3:119530472 | missense | G/G | 2.40E-09 | 79  | 99 | 50 | 99 | 0/0 | 0/0 | 0/0 | match | match | match |
| 108971 | TruSeqV2    | 3:119530497 | missense | G/G | 8.88E-16 | 246 | 99 | 41 | 89 | 0/0 | 0/0 | 0/0 | match | match | match |
| 115239 | TruSeqV2    | 3:119530497 | missense | G/G | 4.44E-16 | 170 | 99 | 18 | 54 | 0/0 | 0/0 | 0/0 | match | match | match |
| 132306 | Agilent38MB | 3:119530497 | missense | G/G | 2.22E-16 | 38  | 87 | 34 | 90 | 0/0 | 0/0 | 0/0 | match | match | match |
| 163383 | TruSeqV2    | 3:119530497 | missense | G/G | 4.44E-16 | 171 | 99 | 37 | 99 | 0/0 | 0/0 | 0/0 | match | match | match |
| 198564 | Agilent38MB | 3:119530497 | missense | G/G | 2.00E-15 | 78  | 99 | 46 | 99 | 0/0 | 0/0 | 0/0 | match | match | match |
| 108971 | TruSeqV2    | 3:119530542 | missense | A/A | 2.22E-16 | 154 | 99 | 55 | 99 | 0/0 | 0/0 | 0/0 | match | match | match |
| 115239 | TruSeqV2    | 3:119530542 | missense | A/A | 2.22E-16 | 118 | 99 | 29 | 54 | 0/0 | 0/0 | 0/0 | match | match | match |
| 132306 | Agilent38MB | 3:119530542 | missense | A/A | 4.44E-16 | 20  | 48 | 28 | 78 | 0/0 | 0/0 | 0/0 | match | match | match |
| 163383 | TruSeqV2    | 3:119530542 | missense | A/A | 2.22E-16 | 111 | 99 | 38 | 99 | 0/0 | 0/0 | 0/0 | match | match | match |
| 198564 | Agilent38MB | 3:119530542 | missense | A/A | 4.44E-16 | 49  | 99 | 41 | 99 | 0/0 | 0/0 | 0/0 | match | match | match |
| 108971 | TruSeqV2    | 3:119533733 | intronic | A/G | 8.88E-16 | 42  | 99 | 31 | 99 | 0/1 | 0/1 | 0/1 | match | match | match |
| 115239 | TruSeqV2    | 3:119533733 | intronic | G/G | 5.77E-15 | 30  | 84 | 18 | 40 | 0/0 | 0/0 | 0/0 | match | match | match |
| 132306 | Agilent38MB | 3:119533733 | intronic | G/G | 9.99E-15 | 21  | 60 | 31 | 70 | 0/0 | 0/0 | 0/0 | match | match | match |
| 163383 | TruSeqV2    | 3:119533733 | intronic | A/G | 8.22E-15 | 24  | 99 | 33 | 99 | 0/1 | 0/1 | 0/1 | match | match | match |
| 198564 | Agilent38MB | 3:119533733 | intronic | A/G | 9.37E-13 | 36  | 99 | 30 | 99 | 0/1 | 0/1 | 0/1 | match | match | match |
| 108971 | TruSeqV2    | 3:119533910 | synon    | C/C | 2.22E-16 | 130 | 99 | 34 | 99 | 1/1 | 1/1 | 1/1 | match | match | match |
| 115239 | TruSeqV2    | 3:119533910 | synon    | C/C | 2.22E-16 | 111 | 99 | 20 | 60 | 1/1 | 1/1 | 1/1 | match | match | match |
| 132306 | Agilent38MB | 3:119533910 | synon    | C/C | 2.22E-16 | 78  | 99 | 28 | 84 | 1/1 | 1/1 | 1/1 | match | match | match |
| 163383 | TruSeqV2    | 3:119533910 | synon    | C/C | 2.22E-16 | 110 | 99 | 38 | 99 | 1/1 | 1/1 | 1/1 | match | match | match |
| 198564 | Agilent38MB | 3:119533910 | synon    | C/C | 2.22E-16 | 183 | 99 | 32 | 96 | 1/1 | 1/1 | 1/1 | match | match | match |
| 108971 | TruSeqV2    | 3:119534153 | intronic | C/T | 2.44E-13 | 239 | 99 | 27 | 99 | 0/1 | 0/1 | 0/1 | match | match | match |
| 115239 | TruSeqV2    | 3:119534153 | intronic | T/T | 1.39E-11 | 200 | 99 | 17 | 18 | 1/1 | 1/1 | 1/1 | match | match | match |
| 132306 | Agilent38MB | 3:119534153 | intronic | C/T | 5.57E-14 | 18  | 99 | 31 | 99 | 0/1 | 0/1 | 0/1 | match | match | match |
| 163383 | TruSeqV2    | 3:119534153 | intronic | C/T | 1.67E-14 | 175 | 99 | 30 | 99 | 0/1 | 0/1 | 0/1 | match | match | match |
| 198564 | Agilent38MB | 3:119534153 | intronic | C/C | 3.32E-13 | 73  | 99 | 35 | 99 | 0/0 | 0/0 | 0/0 | match | match | match |
| 108971 | TruSeqV2    | 3:119534626 | missense | G/G | 6.66E-16 | 112 | 99 | 40 | 99 | 0/0 | 0/0 | 0/0 | match | match | match |
| 115239 | TruSeqV2    | 3:119534626 | missense | G/G | 6.66E-16 | 79  | 99 | 22 | 57 | 0/0 | 0/0 | 0/0 | match | match | match |
| 132306 | Agilent38MB | 3:119534626 | missense | G/G | 1.11E-15 | 32  | 93 | 32 | 95 | 0/0 | 0/0 | 0/0 | match | match | match |
| 163383 | TruSeqV2    | 3:119534626 | missense | G/G | 8.88E-16 | 100 | 99 | 40 | 99 | 0/0 | 0/0 | 0/0 | match | match | match |
| 198564 | Agilent38MB | 3:119534626 | missense | G/G | 2.66E-15 | 80  | 99 | 43 | 99 | 0/0 | 0/0 | 0/0 | match | match | match |
| 108971 | TruSeqV2    | 3:119534659 | missense | C/C | 4.44E-16 | 109 | 99 | 43 | 99 | 0/0 | 0/0 | 0/0 | match | match | match |
| 115239 | TruSeqV2    | 3:119534659 | missense | C/C | 2.22E-16 | 73  | 99 | 14 | 21 | 0/0 | 0/0 | 0/0 | match | match | match |
| 132306 | Agilent38MB | 3:119534659 | missense | C/C | 2.22E-16 | 27  | 48 | 40 | 96 | 0/0 | 0/0 | 0/0 | match | match | match |
| 163383 | TruSeqV2    | 3:119534659 | missense | C/C | 4.44E-16 | 84  | 99 | 38 | 99 | 0/0 | 0/0 | 0/0 | match | match | match |
| 198564 | Agilent38MB | 3:119534659 | missense | C/C | 2.22E-16 | 59  | 99 | 45 | 99 | 0/0 | 0/0 | 0/0 | match | match | match |
| 108971 | TruSeqV2    | 3:119535961 | missense | A/A | 1.11E-15 | 84  | 99 | 29 | 72 | 0/0 | 0/0 | 0/0 | match | match | match |
| 115239 | TruSeqV2    | 3:119535961 | missense | A/A | 1.11E-15 | 51  | 99 | 20 | 57 | 0/0 | 0/0 | 0/0 | match | match | match |

|        |             |             |          |     |          |     |    |    |    |     |     |     |       |       |       |
|--------|-------------|-------------|----------|-----|----------|-----|----|----|----|-----|-----|-----|-------|-------|-------|
| 132306 | Agilent38MB | 3:119535961 | missense | A/A | 2.00E-15 | 162 | 99 | 31 | 90 | 0/0 | 0/0 | 0/0 | match | match | match |
| 163383 | TruSeqV2    | 3:119535961 | missense | A/A | 1.55E-15 | 67  | 99 | 49 | 99 | 0/0 | 0/0 | 0/0 | match | match | match |
| 198564 | Agilent38MB | 3:119535961 | missense | A/A | 1.20E-14 | 276 | 99 | 36 | 90 | 0/0 | 0/0 | 0/0 | match | match | match |
| 108971 | TruSeqV2    | 3:121615288 | synon    | C/C | 2.22E-16 | 75  | 99 | 49 | 99 | 0/0 | 0/0 | 0/0 | match | match | match |
| 115239 | TruSeqV2    | 3:121615288 | synon    | C/C | 2.22E-16 | 38  | 99 | 47 | 99 | 0/0 | 0/0 | 0/0 | match | match | match |
| 132306 | Agilent38MB | 3:121615288 | synon    | C/C | 4.44E-16 | 274 | 99 | 33 | 81 | 0/0 | 0/0 | 0/0 | match | match | match |
| 163383 | TruSeqV2    | 3:121615288 | synon    | C/C | 4.44E-16 | 68  | 99 | 30 | 75 | 0/0 | 0/0 | 0/0 | match | match | match |
| 198564 | Agilent38MB | 3:121615288 | synon    | C/C | 1.33E-15 | 443 | 99 | 40 | 99 | 0/0 | 0/0 | 0/0 | match | match | match |
| 108971 | TruSeqV2    | 3:121615317 | missense | G/G | 1.33E-15 | 70  | 99 | 45 | 99 | 0/0 | 0/0 | 0/0 | match | match | match |
| 115239 | TruSeqV2    | 3:121615317 | missense | G/G | 4.44E-16 | 27  | 75 | 36 | 90 | 0/0 | 0/0 | 0/0 | match | match | match |
| 132306 | Agilent38MB | 3:121615317 | missense | G/G | 6.66E-16 | 217 | 99 | 29 | 75 | 0/0 | 0/0 | 0/0 | match | match | match |
| 163383 | TruSeqV2    | 3:121615317 | missense | G/G | 6.66E-16 | 60  | 99 | 26 | 75 | 0/0 | 0/0 | 0/0 | match | match | match |
| 198564 | Agilent38MB | 3:121615317 | missense | G/G | 4.44E-16 | 378 | 99 | 34 | 65 | 0/0 | 0/0 | 0/0 | match | match | match |
| 108971 | TruSeqV2    | 3:121641693 | synon    | A/G | 6.66E-16 | 103 | 99 | 50 | 99 | 0/1 | 0/1 | 0/1 | match | match | match |
| 115239 | TruSeqV2    | 3:121641693 | synon    | A/A | 2.85E-13 | 76  | 99 | 37 | 26 | 1/1 | 1/1 | 1/1 | match | match | match |
| 132306 | Agilent38MB | 3:121641693 | synon    | A/G | 2.22E-16 | 80  | 99 | 26 | 99 | 0/1 | 0/1 | 0/1 | match | match | match |
| 163383 | TruSeqV2    | 3:121641693 | synon    | G/G | 8.88E-16 | 93  | 99 | 34 | 93 | 0/0 | 0/0 | 0/0 | match | match | match |
| 198564 | Agilent38MB | 3:121641693 | synon    | A/A | 5.89E-13 | 121 | 99 | 45 | 99 | 1/1 | 1/1 | 1/1 | match | match | match |
| 108971 | TruSeqV2    | 3:121643804 | missense | C/T | 4.66E-15 | 162 | 99 | 54 | 99 | 0/1 | 0/1 | 0/1 | match | match | match |
| 115239 | TruSeqV2    | 3:121643804 | missense | T/T | 8.88E-16 | 129 | 99 | 37 | 30 | 1/1 | 1/1 | 1/1 | match | match | match |
| 132306 | Agilent38MB | 3:121643804 | missense | C/T | 1.55E-15 | 304 | 99 | 38 | 99 | 0/1 | 0/1 | 0/1 | match | match | match |
| 163383 | TruSeqV2    | 3:121643804 | missense | C/C | 9.99E-15 | 126 | 99 | 38 | 99 | 0/0 | 0/0 | 0/0 | match | match | match |
| 198564 | Agilent38MB | 3:121643804 | missense | T/T | 6.00E-15 | 516 | 99 | 52 | 99 | 1/1 | 1/1 | 1/1 | match | match | match |
| 108971 | TruSeqV2    | 3:121646641 | synon    | A/G | 6.66E-16 | 79  | 99 | 32 | 99 | 0/1 | 0/1 | 0/1 | match | match | match |
| 115239 | TruSeqV2    | 3:121646641 | synon    | G/G | 8.88E-16 | 46  | 99 | 43 | 89 | 1/1 | 1/1 | 1/1 | match | match | match |
| 132306 | Agilent38MB | 3:121646641 | synon    | A/G | 2.44E-15 | 86  | 99 | 38 | 99 | 0/1 | 0/1 | 0/1 | match | match | match |
| 163383 | TruSeqV2    | 3:121646641 | synon    | A/A | 3.77E-15 | 64  | 99 | 48 | 99 | 0/0 | 0/0 | 0/0 | match | match | match |
| 198564 | Agilent38MB | 3:121646641 | synon    | G/G | 3.33E-15 | 183 | 99 | 43 | 99 | 1/1 | 1/1 | 1/1 | match | match | match |
| 108971 | TruSeqV2    | 3:121647286 | missense | C/T | 2.36E-12 | 154 | 99 | 43 | 99 | 0/1 | 0/1 | 0/1 | match | match | match |
| 132306 | Agilent38MB | 3:121647286 | missense | C/T | 9.89E-13 | 244 | 99 | 34 | 99 | 0/1 | 0/1 | 0/1 | match | match | match |
| 163383 | TruSeqV2    | 3:121647286 | missense | C/C | 6.37E-14 | 105 | 99 | 33 | 93 | 0/0 | 0/0 | 0/0 | match | match | match |
| 198564 | Agilent38MB | 3:121647286 | missense | T/T | 1.09E-11 | 411 | 99 | 47 | 99 | 1/1 | 1/1 | 1/1 | match | match | match |
| 108971 | TruSeqV2    | 3:121648168 | missense | A/G | 8.88E-15 | 143 | 99 | 57 | 99 | 0/1 | 0/1 | 0/1 | match | match | match |
| 115239 | TruSeqV2    | 3:121648168 | missense | A/A | 1.11E-15 | 90  | 99 | 54 | 31 | 1/1 | 1/1 | 1/1 | match | match | match |
| 132306 | Agilent38MB | 3:121648168 | missense | A/G | 1.55E-15 | 232 | 99 | 48 | 99 | 0/1 | 0/1 | 0/1 | match | match | match |
| 163383 | TruSeqV2    | 3:121648168 | missense | G/G | 1.42E-14 | 118 | 99 | 48 | 99 | 0/0 | 0/0 | 0/0 | match | match | match |
| 198564 | Agilent38MB | 3:121648168 | missense | A/A | 2.00E-15 | 391 | 99 | 61 | 99 | 1/1 | 1/1 | 1/1 | match | match | match |
| 108971 | TruSeqV2    | 3:121659774 | missense | A/A | 4.44E-16 | 157 | 99 | 29 | 75 | 0/0 | 0/0 | 0/0 | match | match | match |

|        |             |             |          |     |          |     |    |    |    |     |     |     |       |       |       |
|--------|-------------|-------------|----------|-----|----------|-----|----|----|----|-----|-----|-----|-------|-------|-------|
| 115239 | TruSeqV2    | 3:121659774 | missense | A/A | 2.22E-16 | 111 | 99 | 40 | 99 | 0/0 | 0/0 | 0/0 | match | match | match |
| 132306 | Agilent38MB | 3:121659774 | missense | A/A | 2.22E-16 | 159 | 99 | 32 | 78 | 0/0 | 0/0 | 0/0 | match | match | match |
| 163383 | TruSeqV2    | 3:121659774 | missense | A/A | 2.22E-16 | 139 | 99 | 41 | 99 | 0/0 | 0/0 | 0/0 | match | match | match |
| 198564 | Agilent38MB | 3:121659774 | missense | A/A | 8.88E-16 | 342 | 99 | 42 | 99 | 0/0 | 0/0 | 0/0 | match | match | match |
| 108971 | TruSeqV2    | 3:121659860 | 3'UTR    | C/C | 4.44E-16 | 101 | 99 | 52 | 99 | 0/0 | 0/0 | 0/0 | match | match | match |
| 115239 | TruSeqV2    | 3:121659860 | 3'UTR    | C/C | 4.44E-16 | 74  | 99 | 40 | 99 | 0/0 | 0/0 | 0/0 | match | match | match |
| 132306 | Agilent38MB | 3:121659860 | 3'UTR    | C/C | 8.88E-16 | 102 | 99 | 40 | 99 | 0/0 | 0/0 | 0/0 | match | match | match |
| 163383 | TruSeqV2    | 3:121659860 | 3'UTR    | C/C | 6.66E-16 | 88  | 99 | 45 | 99 | 0/0 | 0/0 | 0/0 | match | match | match |
| 198564 | Agilent38MB | 3:121659860 | 3'UTR    | C/C | 2.22E-16 | 180 | 99 | 54 | 99 | 0/0 | 0/0 | 0/0 | match | match | match |
| 108971 | TruSeqV2    | 3:121660000 | 3'UTR    | T/T | 8.88E-16 | 73  | 99 | 33 | 83 | 0/0 | 0/0 | 0/0 | match | match | match |
| 115239 | TruSeqV2    | 3:121660000 | 3'UTR    | T/T | 2.22E-16 | 66  | 99 | 47 | 99 | 0/0 | 0/0 | 0/0 | match | match | match |
| 163383 | TruSeqV2    | 3:121660000 | 3'UTR    | T/T | 1.11E-15 | 71  | 99 | 40 | 99 | 0/0 | 0/0 | 0/0 | match | match | match |
| 198564 | Agilent38MB | 3:121660000 | 3'UTR    | T/T | 3.11E-15 | 4   | 6  | 43 | 99 | 0/0 | 0/0 | 0/0 | match | match | match |
| 108971 | TruSeqV2    | 3:12393125  | missense | C/C | 2.22E-15 | 145 | 99 | 43 | 99 | 0/0 | 0/0 | 0/0 | match | match | match |
| 115239 | TruSeqV2    | 3:12393125  | missense | C/C | 6.66E-16 | 83  | 99 | 43 | 99 | 0/0 | 0/0 | 0/0 | match | match | match |
| 132306 | Agilent38MB | 3:12393125  | missense | C/C | 8.88E-16 | 138 | 99 | 39 | 95 | 0/0 | 0/0 | 0/0 | match | match | match |
| 163383 | TruSeqV2    | 3:12393125  | missense | C/C | 2.22E-16 | 119 | 99 | 47 | 99 | 0/0 | 0/0 | 0/0 | match | match | match |
| 198564 | Agilent38MB | 3:12393125  | missense | C/C | 2.22E-16 | 188 | 99 | 53 | 99 | 0/0 | 0/0 | 0/0 | match | match | match |
| 108971 | TruSeqV2    | 3:12458208  | synon    | C/C | 4.44E-16 | 63  | 99 | 38 | 99 | 0/0 | 0/0 | 0/0 | match | match | match |
| 115239 | TruSeqV2    | 3:12458208  | synon    | C/C | 6.66E-16 | 51  | 99 | 42 | 99 | 0/0 | 0/0 | 0/0 | match | match | match |
| 132306 | Agilent38MB | 3:12458208  | synon    | C/C | 2.22E-16 | 44  | 99 | 24 | 60 | 0/0 | 0/0 | 0/0 | match | match | match |
| 163383 | TruSeqV2    | 3:12458208  | synon    | C/C | 6.66E-16 | 74  | 99 | 36 | 87 | 0/0 | 0/0 | 0/0 | match | match | match |
| 198564 | Agilent38MB | 3:12458208  | synon    | C/C | 2.00E-15 | 88  | 99 | 42 | 99 | 0/0 | 0/0 | 0/0 | match | match | match |
| 108971 | TruSeqV2    | 3:12475399  | missense | C/C | 2.22E-16 | 29  | 87 | 44 | 99 | 0/0 | 0/0 | 0/0 | match | match | match |
| 115239 | TruSeqV2    | 3:12475399  | missense | C/C | 4.44E-16 | 11  | 33 | 36 | 87 | 0/0 | 0/0 | 0/0 | match | match | match |
| 132306 | Agilent38MB | 3:12475399  | missense | C/C | 2.22E-16 | 236 | 99 | 46 | 99 | 0/0 | 0/0 | 0/0 | match | match | match |
| 163383 | TruSeqV2    | 3:12475399  | missense | C/C | 2.22E-16 | 19  | 54 | 42 | 99 | 0/0 | 0/0 | 0/0 | match | match | match |
| 198564 | Agilent38MB | 3:12475399  | missense | C/C | 2.22E-16 | 419 | 99 | 49 | 99 | 0/0 | 0/0 | 0/0 | match | match | match |
| 108971 | TruSeqV2    | 3:12475557  | synon    | C/C | 2.61E-12 | 59  | 99 | 34 | 84 | 0/0 | 0/0 | 0/0 | match | match | match |
| 115239 | TruSeqV2    | 3:12475557  | synon    | C/C | 2.09E-14 | 48  | 99 | 26 | 63 | 0/0 | 0/0 | 0/0 | match | match | match |
| 132306 | Agilent38MB | 3:12475557  | synon    | C/C | 7.11E-15 | 76  | 99 | 24 | 63 | 0/0 | 0/0 | 0/0 | match | match | match |
| 163383 | TruSeqV2    | 3:12475557  | synon    | C/C | 4.06E-14 | 65  | 99 | 42 | 99 | 0/0 | 0/0 | 0/0 | match | match | match |
| 198564 | Agilent38MB | 3:12475557  | synon    | C/C | 6.06E-14 | 135 | 99 | 35 | 81 | 0/0 | 0/0 | 0/0 | match | match | match |
| 115239 | TruSeqV2    | 3:126249877 | intronic | A/A | 2.46E-07 | 2   | 3  | 24 | 63 | 0/0 | 0/0 | 0/0 | match | match | match |
| 198564 | Agilent38MB | 3:126249877 | intronic | A/A | 1.60E-08 | 4   | 9  | 60 | 99 | 0/0 | 0/0 | 0/0 | match | match | match |
| 198564 | Agilent38MB | 3:126261345 | missense | G/G | 6.00E-15 | 48  | 99 | 12 | 36 | 0/0 | 0/0 | 0/0 | match | match | match |
| 108971 | TruSeqV2    | 3:126262092 | 3'UTR    | G/G | 1.11E-15 | 64  | 99 | 39 | 99 | 0/0 | 0/0 | 0/0 | match | match | match |
| 115239 | TruSeqV2    | 3:126262092 | 3'UTR    | G/G | 6.00E-15 | 61  | 99 | 26 | 57 | 0/0 | 0/0 | 0/0 | match | match | match |

|        |             |             |            |     |            |     |    |    |    |     |     |     |       |       |       |
|--------|-------------|-------------|------------|-----|------------|-----|----|----|----|-----|-----|-----|-------|-------|-------|
| 132306 | Agilent38MB | 3:126262092 | 3'UTR      | G/G | 2.29E-14   | 1   | 3  | 44 | 99 | 0/0 | 0/0 | 0/0 | match | match | match |
| 163383 | TruSeqV2    | 3:126262092 | 3'UTR      | G/G | 1.33E-15   | 62  | 99 | 48 | 99 | 0/0 | 0/0 | 0/0 | match | match | match |
| 132306 | Agilent38MB | 3:142836966 | intergenic | G/G | 1.29E-09   | 2   | 6  | 30 | 78 | 0/0 | 0/0 | 0/0 | match | match | match |
| 108971 | TruSeqV2    | 3:142839313 | 5'UTR      | G/G | 1.26E-11   | 48  | 99 | 11 | 30 | 0/0 | 0/0 | 0/0 | match | match | match |
| 115239 | TruSeqV2    | 3:142839313 | 5'UTR      | G/G | 3.27E-10   | 35  | 90 | 3  | 6  | 0/0 | 0/0 | 0/0 | match | match | match |
| 132306 | Agilent38MB | 3:142839313 | 5'UTR      | G/G | 4.76E-13   | 2   | 6  | 13 | 33 | 0/0 | 0/0 | 0/0 | match | match | match |
| 163383 | TruSeqV2    | 3:142839313 | 5'UTR      | G/G | 5.06E-13   | 31  | 59 | 11 | 32 | 0/0 | 0/0 | 0/0 | match | match | match |
| 198564 | Agilent38MB | 3:142839313 | 5'UTR      | G/G | 5.60E-12   | 2   | 3  | 27 | 68 | 0/0 | 0/0 | 0/0 | match | match | match |
| 108971 | TruSeqV2    | 3:142841740 | 5'UTR      | C/C | 5.50E-07   | 27  | 69 | 46 | 99 | 0/0 | 0/0 | 0/0 | match | match | match |
| 115239 | TruSeqV2    | 3:142841740 | 5'UTR      | C/C | 0.00023585 | 17  | 48 | 42 | 99 | 0/0 | 0/0 | 0/0 | match | match | match |
| 132306 | Agilent38MB | 3:142841740 | 5'UTR      | C/C | 1.04E-11   | 3   | 9  | 38 | 99 | 0/0 | 0/0 | 0/0 | match | match | match |
| 163383 | TruSeqV2    | 3:142841740 | 5'UTR      | C/C | 1.72E-11   | 30  | 75 | 43 | 99 | 0/0 | 0/0 | 0/0 | match | match | match |
| 198564 | Agilent38MB | 3:14474225  | intronic   | C/C | 6.44E-15   | 2   | 6  | 41 | 99 | 1/1 | 1/1 | 1/1 | match | match | match |
| 108971 | TruSeqV2    | 3:14485170  | synon      | C/C | 3.11E-15   | 239 | 99 | 23 | 69 | 0/0 | 0/0 | 0/0 | match | match | match |
| 115239 | TruSeqV2    | 3:14485170  | synon      | C/C | 8.88E-16   | 150 | 99 | 17 | 48 | 0/0 | 0/0 | 0/0 | match | match | match |
| 132306 | Agilent38MB | 3:14485170  | synon      | C/C | 4.44E-16   | 35  | 81 | 29 | 78 | 0/0 | 0/0 | 0/0 | match | match | match |
| 163383 | TruSeqV2    | 3:14485170  | synon      | C/C | 4.44E-16   | 165 | 99 | 35 | 96 | 0/0 | 0/0 | 0/0 | match | match | match |
| 198564 | Agilent38MB | 3:14485170  | synon      | C/C | 6.66E-16   | 57  | 99 | 38 | 98 | 0/0 | 0/0 | 0/0 | match | match | match |
| 108971 | TruSeqV2    | 3:14485193  | missense   | C/C | 2.22E-16   | 290 | 99 | 25 | 63 | 0/0 | 0/0 | 0/0 | match | match | match |
| 115239 | TruSeqV2    | 3:14485193  | missense   | C/C | 4.44E-16   | 179 | 99 | 16 | 42 | 0/0 | 0/0 | 0/0 | match | match | match |
| 132306 | Agilent38MB | 3:14485193  | missense   | C/C | 2.22E-16   | 29  | 78 | 31 | 93 | 0/0 | 0/0 | 0/0 | match | match | match |
| 163383 | TruSeqV2    | 3:14485193  | missense   | C/C | 2.22E-16   | 220 | 99 | 26 | 66 | 0/0 | 0/0 | 0/0 | match | match | match |
| 198564 | Agilent38MB | 3:14485193  | missense   | C/C | 4.44E-16   | 52  | 99 | 40 | 99 | 0/0 | 0/0 | 0/0 | match | match | match |
| 108971 | TruSeqV2    | 3:14485194  | missense   | C/C | 4.44E-16   | 294 | 99 | 25 | 60 | 0/0 | 0/0 | 0/0 | match | match | match |
| 115239 | TruSeqV2    | 3:14485194  | missense   | C/C | 4.44E-16   | 182 | 99 | 16 | 42 | 0/0 | 0/0 | 0/0 | match | match | match |
| 132306 | Agilent38MB | 3:14485194  | missense   | C/C | 2.22E-16   | 30  | 78 | 31 | 93 | 0/0 | 0/0 | 0/0 | match | match | match |
| 163383 | TruSeqV2    | 3:14485194  | missense   | C/C | 6.66E-16   | 222 | 99 | 26 | 66 | 0/0 | 0/0 | 0/0 | match | match | match |
| 198564 | Agilent38MB | 3:14485194  | missense   | C/C | 4.44E-16   | 53  | 99 | 40 | 99 | 0/0 | 0/0 | 0/0 | match | match | match |
| 108971 | TruSeqV2    | 3:14499566  | missense   | G/G | 2.22E-16   | 116 | 99 | 34 | 93 | 0/0 | 0/0 | 0/0 | match | match | match |
| 115239 | TruSeqV2    | 3:14499566  | missense   | G/G | 2.22E-16   | 87  | 99 | 33 | 81 | 0/0 | 0/0 | 0/0 | match | match | match |
| 132306 | Agilent38MB | 3:14499566  | missense   | G/G | 2.22E-16   | 106 | 99 | 30 | 72 | 0/0 | 0/0 | 0/0 | match | match | match |
| 163383 | TruSeqV2    | 3:14499566  | missense   | G/G | 2.22E-16   | 87  | 99 | 35 | 99 | 0/0 | 0/0 | 0/0 | match | match | match |
| 198564 | Agilent38MB | 3:14499566  | missense   | G/G | 1.78E-15   | 201 | 99 | 51 | 99 | 0/0 | 0/0 | 0/0 | match | match | match |
| 108971 | TruSeqV2    | 3:14530721  | 3'UTR      | A/G | 4.22E-15   | 75  | 99 | 43 | 99 | 0/1 | 0/1 | 0/1 | match | match | match |
| 115239 | TruSeqV2    | 3:14530721  | 3'UTR      | A/A | 1.11E-15   | 45  | 99 | 37 | 99 | 0/0 | 0/0 | 0/0 | match | match | match |
| 163383 | TruSeqV2    | 3:14530721  | 3'UTR      | A/A | 1.11E-15   | 82  | 99 | 43 | 99 | 0/0 | 0/0 | 0/0 | match | match | match |
| 108971 | TruSeqV2    | 3:183637722 | 3'UTR      | T/G | 6.66E-15   | 63  | 99 | 44 | 99 | 0/1 | 0/1 | 0/1 | match | match | match |
| 115239 | TruSeqV2    | 3:183637722 | 3'UTR      | T/T | 1.55E-15   | 33  | 90 | 58 | 29 | 0/0 | 0/0 | 0/0 | match | match | match |

|        |             |             |          |     |          |     |    |    |    |     |     |     |       |       |       |
|--------|-------------|-------------|----------|-----|----------|-----|----|----|----|-----|-----|-----|-------|-------|-------|
| 163383 | TruSeqV2    | 3:183637722 | 3'UTR    | T/T | 4.44E-16 | 58  | 99 | 39 | 91 | 0/0 | 0/0 | 0/0 | match | match | match |
| 108971 | TruSeqV2    | 3:183637845 | 3'UTR    | T/C | 8.70E-14 | 198 | 99 | 36 | 99 | 0/1 | 0/1 | 0/1 | match | match | match |
| 115239 | TruSeqV2    | 3:183637845 | 3'UTR    | C/C | 6.00E-15 | 126 | 99 | 33 | 55 | 1/1 | 1/1 | 1/1 | match | match | match |
| 163383 | TruSeqV2    | 3:183637845 | 3'UTR    | T/T | 3.55E-15 | 170 | 99 | 36 | 96 | 0/0 | 0/0 | 0/0 | match | match | match |
| 108971 | TruSeqV2    | 3:183643407 | missense | G/G | 4.44E-16 | 125 | 99 | 37 | 99 | 0/0 | 0/0 | 0/0 | match | match | match |
| 115239 | TruSeqV2    | 3:183643407 | missense | G/G | 2.22E-16 | 98  | 99 | 24 | 60 | 0/0 | 0/0 | 0/0 | match | match | match |
| 132306 | Agilent38MB | 3:183643407 | missense | G/G | 2.22E-16 | 68  | 99 | 30 | 84 | 0/0 | 0/0 | 0/0 | match | match | match |
| 163383 | TruSeqV2    | 3:183643407 | missense | G/G | 4.44E-16 | 117 | 99 | 35 | 99 | 0/0 | 0/0 | 0/0 | match | match | match |
| 198564 | Agilent38MB | 3:183643407 | missense | G/G | 3.33E-15 | 95  | 99 | 43 | 99 | 0/0 | 0/0 | 0/0 | match | match | match |
| 108971 | TruSeqV2    | 3:183660585 | synon    | G/A | 3.33E-15 | 260 | 99 | 41 | 99 | 0/1 | 0/1 | 0/1 | match | match | match |
| 115239 | TruSeqV2    | 3:183660585 | synon    | A/A | 6.88E-15 | 158 | 99 | 33 | 55 | 1/1 | 1/1 | 1/1 | match | match | match |
| 132306 | Agilent38MB | 3:183660585 | synon    | G/G | 8.88E-16 | 127 | 99 | 29 | 72 | 0/0 | 0/0 | 0/0 | match | match | match |
| 163383 | TruSeqV2    | 3:183660585 | synon    | G/G | 6.66E-16 | 224 | 99 | 42 | 99 | 0/0 | 0/0 | 0/0 | match | match | match |
| 198564 | Agilent38MB | 3:183660585 | synon    | G/G | 3.86E-14 | 213 | 99 | 38 | 99 | 0/0 | 0/0 | 0/0 | match | match | match |
| 108971 | TruSeqV2    | 3:183660603 | stop     | G/G | 2.22E-16 | 290 | 99 | 36 | 96 | 0/0 | 0/0 | 0/0 | match | match | match |
| 115239 | TruSeqV2    | 3:183660603 | stop     | G/G | 2.22E-16 | 190 | 99 | 36 | 96 | 0/0 | 0/0 | 0/0 | match | match | match |
| 132306 | Agilent38MB | 3:183660603 | stop     | G/G | 4.44E-16 | 124 | 99 | 27 | 72 | 0/0 | 0/0 | 0/0 | match | match | match |
| 163383 | TruSeqV2    | 3:183660603 | stop     | G/G | 4.44E-16 | 255 | 99 | 39 | 99 | 0/0 | 0/0 | 0/0 | match | match | match |
| 198564 | Agilent38MB | 3:183660603 | stop     | G/G | 8.88E-16 | 214 | 99 | 35 | 87 | 0/0 | 0/0 | 0/0 | match | match | match |
| 108971 | TruSeqV2    | 3:183663700 | fs       | C/C | 6.66E-16 | 241 | 99 | 51 | 99 | 0/0 | 0/0 | 0/0 | match | match | match |
| 115239 | TruSeqV2    | 3:183663700 | fs       | C/C | 4.44E-16 | 241 | 99 | 51 | 99 | 0/0 | 0/0 | 0/0 | match | match | match |
| 132306 | Agilent38MB | 3:183663700 | fs       | C/C | 6.66E-16 | 241 | 99 | 51 | 99 | 0/0 | 0/0 | 0/0 | match | match | match |
| 163383 | TruSeqV2    | 3:183663700 | fs       | C/C | 8.88E-16 | 241 | 99 | 51 | 99 | 0/0 | 0/0 | 0/0 | match | match | match |
| 198564 | Agilent38MB | 3:183663700 | fs       | C/C | 6.66E-16 | 241 | 99 | 51 | 99 | 0/0 | 0/0 | 0/0 | match | match | match |
| 108971 | TruSeqV2    | 3:183685534 | synon    | G/G | 4.44E-16 | 79  | 99 | 37 | 99 | 1/1 | 1/1 | 1/1 | match | match | match |
| 115239 | TruSeqV2    | 3:183685534 | synon    | G/G | 4.44E-16 | 50  | 99 | 40 | 77 | 1/1 | 1/1 | 1/1 | match | match | match |
| 132306 | Agilent38MB | 3:183685534 | synon    | G/A | 6.66E-16 | 26  | 99 | 36 | 99 | 0/1 | 0/1 | 0/1 | match | match | match |
| 163383 | TruSeqV2    | 3:183685534 | synon    | A/A | 2.22E-15 | 73  | 99 | 46 | 99 | 0/0 | 0/0 | 0/0 | match | match | match |
| 198564 | Agilent38MB | 3:183685534 | synon    | G/A | 4.44E-16 | 69  | 99 | 43 | 99 | 0/1 | 0/1 | 0/1 | match | match | match |
| 108971 | TruSeqV2    | 3:183696387 | synon    | G/G | 1.12E-13 | 106 | 99 | 32 | 93 | 0/0 | 0/0 | 0/0 | match | match | match |
| 115239 | TruSeqV2    | 3:183696387 | synon    | G/G | 4.44E-15 | 73  | 99 | 25 | 69 | 0/0 | 0/0 | 0/0 | match | match | match |
| 132306 | Agilent38MB | 3:183696387 | synon    | G/G | 6.66E-16 | 64  | 99 | 41 | 99 | 0/0 | 0/0 | 0/0 | match | match | match |
| 163383 | TruSeqV2    | 3:183696387 | synon    | G/G | 6.66E-16 | 102 | 99 | 31 | 73 | 0/0 | 0/0 | 0/0 | match | match | match |
| 198564 | Agilent38MB | 3:183696387 | synon    | G/G | 1.11E-15 | 115 | 99 | 41 | 99 | 0/0 | 0/0 | 0/0 | match | match | match |
| 108971 | TruSeqV2    | 3:183699516 | synon    | T/C | 1.11E-15 | 80  | 99 | 44 | 99 | 0/1 | 0/1 | 0/1 | match | match | match |
| 115239 | TruSeqV2    | 3:183699516 | synon    | T/T | 1.55E-15 | 46  | 97 | 51 | 99 | 0/0 | 0/0 | 0/0 | match | match | match |
| 132306 | Agilent38MB | 3:183699516 | synon    | T/C | 8.88E-16 | 159 | 99 | 42 | 99 | 0/1 | 0/1 | 0/1 | match | match | match |
| 163383 | TruSeqV2    | 3:183699516 | synon    | T/T | 2.22E-15 | 67  | 99 | 52 | 99 | 0/0 | 0/0 | 0/0 | match | match | match |

|        |             |             |            |     |          |     |    |    |    |     |     |     |       |       |       |
|--------|-------------|-------------|------------|-----|----------|-----|----|----|----|-----|-----|-----|-------|-------|-------|
| 198564 | Agilent38MB | 3:183699516 | synon      | T/C | 1.55E-15 | 224 | 99 | 50 | 99 | 0/1 | 0/1 | 0/1 | match | match | match |
| 108971 | TruSeqV2    | 3:38307510  | synon      | T/T | 1.44E-14 | 144 | 99 | 56 | 99 | 0/0 | 0/0 | 0/0 | match | match | match |
| 115239 | TruSeqV2    | 3:38307510  | synon      | C/T | 6.44E-15 | 102 | 99 | 36 | 99 | 0/1 | 0/1 | 0/1 | match | match | match |
| 132306 | Agilent38MB | 3:38307510  | synon      | T/T | 8.88E-16 | 110 | 99 | 48 | 99 | 0/0 | 0/0 | 0/0 | match | match | match |
| 163383 | TruSeqV2    | 3:38307510  | synon      | T/T | 1.33E-15 | 114 | 99 | 37 | 99 | 0/0 | 0/0 | 0/0 | match | match | match |
| 198564 | Agilent38MB | 3:38307510  | synon      | T/T | 2.80E-14 | 188 | 99 | 47 | 99 | 0/0 | 0/0 | 0/0 | match | match | match |
| 108971 | TruSeqV2    | 3:38315821  | missense   | C/C | 1.69E-14 | 177 | 99 | 38 | 99 | 0/0 | 0/0 | 0/0 | match | match | match |
| 115239 | TruSeqV2    | 3:38315821  | missense   | C/C | 4.44E-16 | 120 | 99 | 24 | 60 | 0/0 | 0/0 | 0/0 | match | match | match |
| 132306 | Agilent38MB | 3:38315821  | missense   | C/C | 4.44E-16 | 314 | 99 | 31 | 90 | 0/0 | 0/0 | 0/0 | match | match | match |
| 163383 | TruSeqV2    | 3:38315821  | missense   | C/C | 4.44E-16 | 118 | 99 | 39 | 99 | 0/0 | 0/0 | 0/0 | match | match | match |
| 198564 | Agilent38MB | 3:38315821  | missense   | C/C | 1.11E-15 | 542 | 99 | 60 | 99 | 0/0 | 0/0 | 0/0 | match | match | match |
| 108971 | TruSeqV2    | 3:38316933  | synon      | G/G | 2.22E-16 | 270 | 99 | 30 | 84 | 0/0 | 0/0 | 0/0 | match | match | match |
| 115239 | TruSeqV2    | 3:38316933  | synon      | G/G | 2.22E-16 | 157 | 99 | 16 | 42 | 0/0 | 0/0 | 0/0 | match | match | match |
| 132306 | Agilent38MB | 3:38316933  | synon      | G/G | 4.44E-16 | 97  | 99 | 28 | 75 | 0/0 | 0/0 | 0/0 | match | match | match |
| 163383 | TruSeqV2    | 3:38316933  | synon      | G/G | 4.44E-16 | 232 | 99 | 28 | 75 | 0/0 | 0/0 | 0/0 | match | match | match |
| 198564 | Agilent38MB | 3:38316933  | synon      | G/G | 1.33E-14 | 168 | 99 | 30 | 69 | 0/0 | 0/0 | 0/0 | match | match | match |
| 108971 | TruSeqV2    | 3:38318499  | synon      | C/C | 2.89E-15 | 196 | 99 | 32 | 90 | 0/0 | 0/0 | 0/0 | match | match | match |
| 115239 | TruSeqV2    | 3:38318499  | synon      | C/C | 2.98E-14 | 133 | 99 | 16 | 42 | 0/0 | 0/0 | 0/0 | match | match | match |
| 132306 | Agilent38MB | 3:38318499  | synon      | C/C | 2.22E-15 | 33  | 77 | 38 | 99 | 0/0 | 0/0 | 0/0 | match | match | match |
| 163383 | TruSeqV2    | 3:38318499  | synon      | C/C | 2.66E-15 | 180 | 99 | 41 | 99 | 0/0 | 0/0 | 0/0 | match | match | match |
| 198564 | Agilent38MB | 3:38318499  | synon      | C/C | 8.88E-16 | 54  | 99 | 27 | 75 | 0/0 | 0/0 | 0/0 | match | match | match |
| 132306 | Agilent38MB | 3:38365550  | intergenic | T/T | 1.55E-15 | 2   | 3  | 30 | 66 | 0/0 | 0/0 | 0/0 | match | match | match |
| 163383 | TruSeqV2    | 3:38365550  | intergenic | T/T | 1.11E-15 | 1   | 3  | 38 | 99 | 0/0 | 0/0 | 0/0 | match | match | match |
| 198564 | Agilent38MB | 3:38365550  | intergenic | T/T | 3.55E-15 | 2   | 6  | 48 | 99 | 0/0 | 0/0 | 0/0 | match | match | match |
| 108971 | TruSeqV2    | 3:38366871  | intergenic | G/G | 1.55E-15 | 47  | 99 | 38 | 99 | 1/1 | 1/1 | 1/1 | match | match | match |
| 115239 | TruSeqV2    | 3:38366871  | intergenic | G/G | 1.33E-15 | 26  | 78 | 19 | 57 | 1/1 | 1/1 | 1/1 | match | match | match |
| 132306 | Agilent38MB | 3:38366871  | intergenic | G/G | 4.44E-16 | 4   | 12 | 36 | 99 | 1/1 | 1/1 | 1/1 | match | match | match |
| 163383 | TruSeqV2    | 3:38366871  | intergenic | G/G | 6.66E-16 | 52  | 99 | 37 | 99 | 1/1 | 1/1 | 1/1 | match | match | match |
| 198564 | Agilent38MB | 3:38366871  | intergenic | G/G | 6.66E-16 | 18  | 54 | 44 | 99 | 1/1 | 1/1 | 1/1 | match | match | match |
| 108971 | TruSeqV2    | 3:38367984  | intergenic | A/A | 6.66E-16 | 32  | 44 | 52 | 99 | 0/0 | 0/0 | 0/0 | match | match | match |
| 115239 | TruSeqV2    | 3:38367984  | intergenic | A/A | 1.05E-13 | 22  | 26 | 26 | 60 | 0/0 | 0/0 | 0/0 | match | match | match |
| 163383 | TruSeqV2    | 3:38367984  | intergenic | G/G | 2.44E-15 | 22  | 66 | 53 | 99 | 1/1 | 1/1 | 1/1 | match | match | match |
| 198564 | Agilent38MB | 3:38367984  | intergenic | A/G | 4.44E-16 | 7   | 99 | 55 | 99 | 0/1 | 0/1 | 0/1 | match | match | match |
| 108971 | TruSeqV2    | 3:42915878  | synon      | C/C | 1.55E-15 | 117 | 99 | 46 | 99 | 0/0 | 0/0 | 0/0 | match | match | match |
| 115239 | TruSeqV2    | 3:42915878  | synon      | C/C | 4.44E-16 | 104 | 99 | 14 | 36 | 0/0 | 0/0 | 0/0 | match | match | match |
| 132306 | Agilent38MB | 3:42915878  | synon      | T/C | 1.55E-15 | 44  | 99 | 33 | 99 | 0/1 | 0/1 | 0/1 | match | match | match |
| 163383 | TruSeqV2    | 3:42915878  | synon      | C/C | 4.44E-16 | 104 | 99 | 26 | 63 | 0/0 | 0/0 | 0/0 | match | match | match |
| 198564 | Agilent38MB | 3:42915878  | synon      | T/T | 4.42E-14 | 119 | 99 | 32 | 95 | 1/1 | 1/1 | 1/1 | match | match | match |

|        |             |             |            |     |          |     |    |    |    |     |     |     |       |       |       |
|--------|-------------|-------------|------------|-----|----------|-----|----|----|----|-----|-----|-----|-------|-------|-------|
| 108971 | TruSeqV2    | 3:42916511  | synon      | C/C | 2.09E-14 | 99  | 99 | 35 | 93 | 0/0 | 0/0 | 0/0 | match | match | match |
| 115239 | TruSeqV2    | 3:42916511  | synon      | C/C | 1.11E-15 | 54  | 99 | 24 | 57 | 0/0 | 0/0 | 0/0 | match | match | match |
| 132306 | Agilent38MB | 3:42916511  | synon      | C/C | 3.06E-14 | 39  | 96 | 36 | 93 | 0/0 | 0/0 | 0/0 | match | match | match |
| 163383 | TruSeqV2    | 3:42916511  | synon      | C/C | 6.13E-13 | 57  | 99 | 32 | 81 | 0/0 | 0/0 | 0/0 | match | match | match |
| 198564 | Agilent38MB | 3:42916511  | synon      | C/C | 6.44E-15 | 63  | 99 | 25 | 63 | 0/0 | 0/0 | 0/0 | match | match | match |
| 132306 | Agilent38MB | 3:42922697  | intergenic | G/G | 6.66E-16 | 2   | 6  | 27 | 81 | 0/0 | 0/0 | 0/0 | match | match | match |
| 198564 | Agilent38MB | 3:42922697  | intergenic | G/G | 4.66E-15 | 1   | 3  | 51 | 99 | 0/0 | 0/0 | 0/0 | match | match | match |
| 198564 | Agilent38MB | 4:100010010 | promoter   | C/C | 2.78E-14 | 1   | 3  | 18 | 54 | 0/0 | 0/0 | 0/0 | match | match | match |
| 198564 | Agilent38MB | 4:100014342 | promoter   | G/G | 2.66E-15 | 4   | 12 | 46 | 99 | 0/0 | 0/0 | 0/0 | match | match | match |
| 108971 | TruSeqV2    | 4:100047812 | synon      | G/A | 5.55E-15 | 85  | 99 | 48 | 99 | 0/1 | 0/1 | 0/1 | match | match | match |
| 115239 | TruSeqV2    | 4:100047812 | synon      | G/G | 6.22E-15 | 68  | 99 | 39 | 99 | 0/0 | 0/0 | 0/0 | match | match | match |
| 132306 | Agilent38MB | 4:100047812 | synon      | G/A | 1.33E-15 | 193 | 99 | 31 | 99 | 0/1 | 0/1 | 0/1 | match | match | match |
| 163383 | TruSeqV2    | 4:100047812 | synon      | G/G | 1.55E-15 | 63  | 99 | 49 | 99 | 0/0 | 0/0 | 0/0 | match | match | match |
| 198564 | Agilent38MB | 4:100047812 | synon      | A/A | 1.58E-14 | 320 | 99 | 57 | 99 | 1/1 | 1/1 | 1/1 | match | match | match |
| 108971 | TruSeqV2    | 4:100048414 | missense   | T/C | 2.89E-15 | 146 | 99 | 40 | 99 | 0/1 | 0/1 | 0/1 | match | match | match |
| 115239 | TruSeqV2    | 4:100048414 | missense   | C/C | 6.66E-16 | 105 | 99 | 30 | 90 | 1/1 | 1/1 | 1/1 | match | match | match |
| 132306 | Agilent38MB | 4:100048414 | missense   | T/C | 2.22E-15 | 126 | 99 | 24 | 99 | 0/1 | 0/1 | 0/1 | match | match | match |
| 163383 | TruSeqV2    | 4:100048414 | missense   | C/C | 6.66E-16 | 139 | 99 | 53 | 99 | 1/1 | 1/1 | 1/1 | match | match | match |
| 198564 | Agilent38MB | 4:100048414 | missense   | T/T | 5.28E-14 | 192 | 99 | 32 | 90 | 0/0 | 0/0 | 0/0 | match | match | match |
| 108971 | TruSeqV2    | 4:100052733 | synon      | C/A | 2.44E-15 | 166 | 99 | 37 | 99 | 0/1 | 0/1 | 0/1 | match | match | match |
| 115239 | TruSeqV2    | 4:100052733 | synon      | A/A | 8.88E-16 | 115 | 99 | 38 | 99 | 1/1 | 1/1 | 1/1 | match | match | match |
| 132306 | Agilent38MB | 4:100052733 | synon      | C/A | 1.55E-15 | 148 | 99 | 34 | 99 | 0/1 | 0/1 | 0/1 | match | match | match |
| 163383 | TruSeqV2    | 4:100052733 | synon      | A/A | 6.66E-16 | 137 | 99 | 38 | 99 | 1/1 | 1/1 | 1/1 | match | match | match |
| 198564 | Agilent38MB | 4:100052733 | synon      | C/C | 5.28E-14 | 280 | 99 | 41 | 99 | 0/0 | 0/0 | 0/0 | match | match | match |
| 108971 | TruSeqV2    | 4:100062819 | synon      | G/G | 4.44E-16 | 148 | 99 | 31 | 93 | 1/1 | 1/1 | 1/1 | match | match | match |
| 115239 | TruSeqV2    | 4:100062819 | synon      | G/G | 6.66E-16 | 68  | 99 | 34 | 99 | 1/1 | 1/1 | 1/1 | match | match | match |
| 132306 | Agilent38MB | 4:100062819 | synon      | G/G | 2.22E-16 | 215 | 99 | 50 | 99 | 1/1 | 1/1 | 1/1 | match | match | match |
| 163383 | TruSeqV2    | 4:100062819 | synon      | G/G | 2.22E-16 | 109 | 99 | 35 | 99 | 1/1 | 1/1 | 1/1 | match | match | match |
| 198564 | Agilent38MB | 4:100062819 | synon      | G/G | 4.44E-16 | 401 | 99 | 36 | 99 | 1/1 | 1/1 | 1/1 | match | match | match |
| 198564 | Agilent38MB | 4:100065853 | promoter   | C/C | 4.44E-16 | 2   | 5  | 45 | 99 | 0/0 | 0/0 | 0/0 | match | match | match |
| 108971 | TruSeqV2    | 4:100128682 | synon      | C/C | 4.44E-16 | 110 | 99 | 34 | 90 | 0/0 | 0/0 | 0/0 | match | match | match |
| 115239 | TruSeqV2    | 4:100128682 | synon      | C/C | 4.44E-16 | 52  | 99 | 41 | 99 | 0/0 | 0/0 | 0/0 | match | match | match |
| 132306 | Agilent38MB | 4:100128682 | synon      | C/C | 4.44E-16 | 119 | 99 | 47 | 99 | 0/0 | 0/0 | 0/0 | match | match | match |
| 163383 | TruSeqV2    | 4:100128682 | synon      | C/C | 4.44E-16 | 102 | 99 | 33 | 96 | 0/0 | 0/0 | 0/0 | match | match | match |
| 198564 | Agilent38MB | 4:100128682 | synon      | C/C | 2.22E-16 | 191 | 99 | 35 | 99 | 0/0 | 0/0 | 0/0 | match | match | match |
| 108971 | TruSeqV2    | 4:100137393 | synon      | G/G | 2.00E-15 | 59  | 99 | 32 | 84 | 0/0 | 0/0 | 0/0 | match | match | match |
| 115239 | TruSeqV2    | 4:100137393 | synon      | G/G | 6.66E-16 | 27  | 75 | 32 | 66 | 0/0 | 0/0 | 0/0 | match | match | match |
| 132306 | Agilent38MB | 4:100137393 | synon      | G/G | 4.44E-16 | 48  | 81 | 36 | 99 | 0/0 | 0/0 | 0/0 | match | match | match |



|        |             |             |          |     |          |     |    |    |    |     |     |     |       |       |       |
|--------|-------------|-------------|----------|-----|----------|-----|----|----|----|-----|-----|-----|-------|-------|-------|
| 163383 | TruSeqV2    | 4:100137393 | synon    | G/G | 2.22E-16 | 41  | 99 | 38 | 90 | 0/0 | 0/0 | 0/0 | match | match | match |
| 198564 | Agilent38MB | 4:100137393 | synon    | G/G | 3.09E-14 | 116 | 99 | 31 | 75 | 0/0 | 0/0 | 0/0 | match | match | match |
| 108971 | TruSeqV2    | 4:100140306 | missense | T/T | 2.22E-16 | 40  | 99 | 50 | 99 | 1/1 | 1/1 | 1/1 | match | match | match |
| 115239 | TruSeqV2    | 4:100140306 | missense | T/T | 2.22E-16 | 20  | 60 | 40 | 99 | 1/1 | 1/1 | 1/1 | match | match | match |
| 132306 | Agilent38MB | 4:100140306 | missense | T/T | 6.66E-16 | 141 | 99 | 44 | 99 | 1/1 | 1/1 | 1/1 | match | match | match |
| 163383 | TruSeqV2    | 4:100140306 | missense | T/T | 4.44E-16 | 40  | 99 | 34 | 99 | 1/1 | 1/1 | 1/1 | match | match | match |
| 198564 | Agilent38MB | 4:100140306 | missense | T/T | 1.11E-15 | 246 | 99 | 47 | 99 | 1/1 | 1/1 | 1/1 | match | match | match |
| 163383 | TruSeqV2    | 4:100142302 | promoter | C/C | 1.11E-15 | 1   | 3  | 41 | 99 | 0/0 | 0/0 | 0/0 | match | match | match |
| 198564 | Agilent38MB | 4:100194977 | 3'UTR    | A/A | 2.78E-14 | 4   | 12 | 35 | 99 | 1/1 | 1/1 | 1/1 | match | match | match |
| 108971 | TruSeqV2    | 4:100197359 | 3'UTR    | A/A | 1.33E-15 | 12  | 36 | 22 | 60 | 0/0 | 0/0 | 0/0 | match | match | match |
| 115239 | TruSeqV2    | 4:100197359 | 3'UTR    | A/A | 2.22E-16 | 9   | 27 | 38 | 70 | 0/0 | 0/0 | 0/0 | match | match | match |
| 132306 | Agilent38MB | 4:100197359 | 3'UTR    | A/A | 1.33E-15 | 2   | 6  | 20 | 45 | 0/0 | 0/0 | 0/0 | match | match | match |
| 163383 | TruSeqV2    | 4:100197359 | 3'UTR    | A/A | 8.88E-16 | 14  | 39 | 30 | 81 | 0/0 | 0/0 | 0/0 | match | match | match |
| 108971 | TruSeqV2    | 4:100197638 | 3'UTR    | C/C | 1.01E-13 | 50  | 99 | 52 | 99 | 0/0 | 0/0 | 0/0 | match | match | match |
| 115239 | TruSeqV2    | 4:100197638 | 3'UTR    | C/C | 9.33E-15 | 36  | 99 | 49 | 99 | 0/0 | 0/0 | 0/0 | match | match | match |
| 132306 | Agilent38MB | 4:100197638 | 3'UTR    | C/C | 1.34E-13 | 3   | 6  | 38 | 99 | 0/0 | 0/0 | 0/0 | match | match | match |
| 163383 | TruSeqV2    | 4:100197638 | 3'UTR    | C/C | 3.22E-13 | 43  | 99 | 50 | 99 | 0/0 | 0/0 | 0/0 | match | match | match |
| 198564 | Agilent38MB | 4:100197638 | 3'UTR    | C/C | 1.67E-14 | 1   | 3  | 52 | 99 | 0/0 | 0/0 | 0/0 | match | match | match |
| 108971 | TruSeqV2    | 4:100205887 | synon    | G/G | 2.22E-16 | 76  | 99 | 48 | 99 | 0/0 | 0/0 | 0/0 | match | match | match |
| 115239 | TruSeqV2    | 4:100205887 | synon    | G/G | 4.44E-16 | 46  | 99 | 46 | 99 | 0/0 | 0/0 | 0/0 | match | match | match |
| 132306 | Agilent38MB | 4:100205887 | synon    | G/G | 6.66E-16 | 55  | 99 | 34 | 84 | 0/0 | 0/0 | 0/0 | match | match | match |
| 163383 | TruSeqV2    | 4:100205887 | synon    | G/G | 6.66E-16 | 51  | 99 | 43 | 99 | 0/0 | 0/0 | 0/0 | match | match | match |
| 198564 | Agilent38MB | 4:100205887 | synon    | G/G | 2.64E-14 | 87  | 99 | 48 | 99 | 0/0 | 0/0 | 0/0 | match | match | match |
| 108971 | TruSeqV2    | 4:100237125 | missense | G/G | 4.44E-16 | 147 | 99 | 36 | 99 | 0/0 | 0/0 | 0/0 | match | match | match |
| 115239 | TruSeqV2    | 4:100237125 | missense | G/G | 2.22E-16 | 130 | 99 | 24 | 69 | 0/0 | 0/0 | 0/0 | match | match | match |
| 132306 | Agilent38MB | 4:100237125 | missense | G/G | 8.88E-16 | 295 | 99 | 32 | 84 | 0/0 | 0/0 | 0/0 | match | match | match |
| 163383 | TruSeqV2    | 4:100237125 | missense | G/G | 2.22E-16 | 133 | 99 | 35 | 84 | 0/0 | 0/0 | 0/0 | match | match | match |
| 198564 | Agilent38MB | 4:100237125 | missense | G/G | 2.22E-16 | 531 | 99 | 42 | 99 | 0/0 | 0/0 | 0/0 | match | match | match |
| 108971 | TruSeqV2    | 4:100239284 | missense | T/T | 1.11E-15 | 118 | 99 | 31 | 92 | 0/0 | 0/0 | 0/0 | match | match | match |
| 115239 | TruSeqV2    | 4:100239284 | missense | T/T | 2.22E-16 | 83  | 99 | 37 | 99 | 0/0 | 0/0 | 0/0 | match | match | match |
| 132306 | Agilent38MB | 4:100239284 | missense | T/T | 1.33E-15 | 166 | 99 | 36 | 99 | 0/0 | 0/0 | 0/0 | match | match | match |
| 163383 | TruSeqV2    | 4:100239284 | missense | T/T | 2.09E-14 | 116 | 99 | 38 | 99 | 0/0 | 0/0 | 0/0 | match | match | match |
| 198564 | Agilent38MB | 4:100239284 | missense | T/T | 2.22E-16 | 344 | 99 | 28 | 51 | 0/0 | 0/0 | 0/0 | match | match | match |
| 108971 | TruSeqV2    | 4:100239291 | missense | G/G | 8.37E-09 | 122 | 99 | 38 | 99 | 0/0 | 0/0 | 0/0 | match | match | match |
| 115239 | TruSeqV2    | 4:100239291 | missense | G/G | 6.49E-09 | 82  | 99 | 42 | 99 | 0/0 | 0/0 | 0/0 | match | match | match |
| 132306 | Agilent38MB | 4:100239291 | missense | G/G | 3.80E-14 | 158 | 99 | 39 | 99 | 0/0 | 0/0 | 0/0 | match | match | match |
| 163383 | TruSeqV2    | 4:100239291 | missense | G/G | 1.39E-10 | 111 | 99 | 41 | 99 | 0/0 | 0/0 | 0/0 | match | match | match |
| 198564 | Agilent38MB | 4:100239291 | missense | G/G | 4.79E-08 | 338 | 99 | 33 | 84 | 0/0 | 0/0 | 0/0 | match | match | match |

|        |             |             |          |     |          |     |    |    |    |     |     |     |       |       |       |
|--------|-------------|-------------|----------|-----|----------|-----|----|----|----|-----|-----|-----|-------|-------|-------|
| 108971 | TruSeqV2    | 4:100239319 | missense | C/C | 1.78E-15 | 95  | 99 | 37 | 99 | 1/1 | 1/1 | 1/1 | match | match | match |
| 115239 | TruSeqV2    | 4:100239319 | missense | T/C | 3.33E-15 | 69  | 99 | 39 | 99 | 0/1 | 0/1 | 0/1 | match | match | match |
| 132306 | Agilent38MB | 4:100239319 | missense | C/C | 3.77E-15 | 144 | 99 | 37 | 99 | 1/1 | 1/1 | 1/1 | match | match | match |
| 163383 | TruSeqV2    | 4:100239319 | missense | C/C | 2.89E-15 | 96  | 99 | 48 | 99 | 1/1 | 1/1 | 1/1 | match | match | match |
| 198564 | Agilent38MB | 4:100239319 | missense | C/C | 6.82E-14 | 296 | 99 | 34 | 99 | 1/1 | 1/1 | 1/1 | match | match | match |
| 108971 | TruSeqV2    | 4:100240002 | synon    | T/T | 4.44E-16 | 110 | 99 | 46 | 99 | 0/0 | 0/0 | 0/0 | match | match | match |
| 115239 | TruSeqV2    | 4:100240002 | synon    | T/T | 4.44E-16 | 58  | 99 | 30 | 81 | 0/0 | 0/0 | 0/0 | match | match | match |
| 132306 | Agilent38MB | 4:100240002 | synon    | T/T | 1.11E-15 | 142 | 99 | 34 | 93 | 0/0 | 0/0 | 0/0 | match | match | match |
| 163383 | TruSeqV2    | 4:100240002 | synon    | T/T | 6.66E-16 | 89  | 99 | 39 | 93 | 0/0 | 0/0 | 0/0 | match | match | match |
| 198564 | Agilent38MB | 4:100240002 | synon    | T/C | 1.20E-10 | 290 | 99 | 42 | 99 | 0/1 | 0/1 | 0/1 | match | match | match |
| 108971 | TruSeqV2    | 4:100240012 | fs       | G/G | 4.44E-16 | 111 | 99 | 43 | 99 | 0/0 | 0/0 | 0/0 | match | match | match |
| 115239 | TruSeqV2    | 4:100240012 | fs       | G/G | 4.44E-16 | 111 | 99 | 43 | 99 | 0/0 | 0/0 | 0/0 | match | match | match |
| 132306 | Agilent38MB | 4:100240012 | fs       | G/G | 2.22E-16 | 111 | 99 | 43 | 99 | 0/0 | 0/0 | 0/0 | match | match | match |
| 163383 | TruSeqV2    | 4:100240012 | fs       | G/G | 2.22E-16 | 111 | 99 | 43 | 99 | 0/0 | 0/0 | 0/0 | match | match | match |
| 198564 | Agilent38MB | 4:100240012 | fs       | G/G | 2.78E-14 | 111 | 99 | 43 | 99 | 0/0 | 0/0 | 0/0 | match | match | match |
| 108971 | TruSeqV2    | 4:100260783 | missense | G/G | 4.61E-10 | 47  | 99 | 58 | 99 | 0/0 | 0/0 | 0/0 | match | match | match |
| 115239 | TruSeqV2    | 4:100260783 | missense | G/G | 3.68E-08 | 34  | 85 | 37 | 87 | 0/0 | 0/0 | 0/0 | match | match | match |
| 132306 | Agilent38MB | 4:100260783 | missense | G/G | 4.45E-11 | 19  | 48 | 28 | 72 | 0/0 | 0/0 | 0/0 | match | match | match |
| 163383 | TruSeqV2    | 4:100260783 | missense | G/G | 6.47E-08 | 38  | 79 | 47 | 99 | 0/0 | 0/0 | 0/0 | match | match | match |
| 198564 | Agilent38MB | 4:100260783 | missense | G/G | 3.40E-14 | 49  | 99 | 43 | 99 | 0/0 | 0/0 | 0/0 | match | match | match |
| 108971 | TruSeqV2    | 4:100266371 | synon    | A/A | 6.66E-16 | 42  | 99 | 71 | 99 | 0/0 | 0/0 | 0/0 | match | match | match |
| 115239 | TruSeqV2    | 4:100266371 | synon    | A/A | 6.66E-16 | 34  | 96 | 48 | 99 | 0/0 | 0/0 | 0/0 | match | match | match |
| 132306 | Agilent38MB | 4:100266371 | synon    | A/A | 6.66E-16 | 25  | 72 | 42 | 99 | 0/0 | 0/0 | 0/0 | match | match | match |
| 163383 | TruSeqV2    | 4:100266371 | synon    | A/A | 6.66E-16 | 44  | 99 | 52 | 99 | 0/0 | 0/0 | 0/0 | match | match | match |
| 198564 | Agilent38MB | 4:100266371 | synon    | G/G | 7.35E-14 | 36  | 99 | 43 | 99 | 1/1 | 1/1 | 1/1 | match | match | match |
| 108971 | TruSeqV2    | 4:100268190 | stop     | C/C | 2.04E-14 | 121 | 99 | 34 | 99 | 1/1 | 1/1 | 1/1 | match | match | match |
| 115239 | TruSeqV2    | 4:100268190 | stop     | C/C | 4.66E-15 | 83  | 99 | 22 | 66 | 1/1 | 1/1 | 1/1 | match | match | match |
| 132306 | Agilent38MB | 4:100268190 | stop     | C/C | 4.44E-16 | 160 | 99 | 31 | 92 | 1/1 | 1/1 | 1/1 | match | match | match |
| 163383 | TruSeqV2    | 4:100268190 | stop     | C/C | 6.66E-16 | 98  | 99 | 30 | 80 | 1/1 | 1/1 | 1/1 | match | match | match |
| 198564 | Agilent38MB | 4:100268190 | stop     | C/C | 1.78E-15 | 332 | 99 | 44 | 99 | 1/1 | 1/1 | 1/1 | match | match | match |
| 108971 | TruSeqV2    | 4:100268279 | missense | C/C | 1.55E-15 | 98  | 99 | 43 | 99 | 0/0 | 0/0 | 0/0 | match | match | match |
| 115239 | TruSeqV2    | 4:100268279 | missense | C/C | 6.66E-16 | 69  | 99 | 46 | 99 | 0/0 | 0/0 | 0/0 | match | match | match |
| 132306 | Agilent38MB | 4:100268279 | missense | C/C | 2.22E-15 | 120 | 99 | 27 | 69 | 0/0 | 0/0 | 0/0 | match | match | match |
| 163383 | TruSeqV2    | 4:100268279 | missense | C/C | 1.55E-15 | 85  | 99 | 33 | 93 | 0/0 | 0/0 | 0/0 | match | match | match |
| 198564 | Agilent38MB | 4:100268279 | missense | C/C | 1.27E-14 | 226 | 99 | 34 | 93 | 0/0 | 0/0 | 0/0 | match | match | match |
| 108971 | TruSeqV2    | 4:100273864 | 5'UTR    | C/C | 2.66E-15 | 156 | 99 | 40 | 99 | 0/0 | 0/0 | 0/0 | match | match | match |
| 115239 | TruSeqV2    | 4:100273864 | 5'UTR    | C/C | 4.44E-16 | 120 | 99 | 32 | 90 | 0/0 | 0/0 | 0/0 | match | match | match |
| 132306 | Agilent38MB | 4:100273864 | 5'UTR    | C/C | 1.55E-15 | 48  | 99 | 42 | 99 | 0/0 | 0/0 | 0/0 | match | match | match |

|        |             |             |          |     |          |     |    |    |    |     |     |     |       |       |       |
|--------|-------------|-------------|----------|-----|----------|-----|----|----|----|-----|-----|-----|-------|-------|-------|
| 163383 | TruSeqV2    | 4:100273864 | 5'UTR    | C/C | 4.44E-16 | 138 | 99 | 41 | 99 | 0/0 | 0/0 | 0/0 | match | match | match |
| 198564 | Agilent38MB | 4:100273864 | 5'UTR    | C/C | 4.44E-16 | 88  | 99 | 42 | 99 | 0/0 | 0/0 | 0/0 | match | match | match |
| 108971 | TruSeqV2    | 4:100341861 | synon    | C/C | 2.22E-16 | 167 | 99 | 37 | 87 | 0/0 | 0/0 | 0/0 | match | match | match |
| 115239 | TruSeqV2    | 4:100341861 | synon    | T/C | 6.66E-16 | 103 | 99 | 32 | 99 | 0/1 | 0/1 | 0/1 | match | match | match |
| 132306 | Agilent38MB | 4:100341861 | synon    | C/C | 2.22E-16 | 200 | 99 | 33 | 90 | 0/0 | 0/0 | 0/0 | match | match | match |
| 163383 | TruSeqV2    | 4:100341861 | synon    | C/C | 2.22E-16 | 169 | 99 | 28 | 69 | 0/0 | 0/0 | 0/0 | match | match | match |
| 198564 | Agilent38MB | 4:100341861 | synon    | C/C | 6.66E-16 | 378 | 99 | 34 | 90 | 0/0 | 0/0 | 0/0 | match | match | match |
| 108971 | TruSeqV2    | 4:100349083 | synon    | G/G | 2.22E-16 | 72  | 99 | 45 | 99 | 0/0 | 0/0 | 0/0 | match | match | match |
| 115239 | TruSeqV2    | 4:100349083 | synon    | G/G | 2.22E-16 | 49  | 99 | 45 | 99 | 0/0 | 0/0 | 0/0 | match | match | match |
| 132306 | Agilent38MB | 4:100349083 | synon    | G/G | 2.22E-16 | 73  | 99 | 33 | 99 | 0/0 | 0/0 | 0/0 | match | match | match |
| 163383 | TruSeqV2    | 4:100349083 | synon    | G/G | 1.33E-15 | 77  | 99 | 47 | 99 | 0/0 | 0/0 | 0/0 | match | match | match |
| 198564 | Agilent38MB | 4:100349083 | synon    | G/G | 4.44E-16 | 108 | 99 | 34 | 96 | 0/0 | 0/0 | 0/0 | match | match | match |
| 108971 | TruSeqV2    | 4:100349135 | missense | C/C | 4.44E-16 | 80  | 99 | 47 | 99 | 0/0 | 0/0 | 0/0 | match | match | match |
| 115239 | TruSeqV2    | 4:100349135 | missense | C/C | 4.44E-16 | 57  | 99 | 42 | 99 | 0/0 | 0/0 | 0/0 | match | match | match |
| 132306 | Agilent38MB | 4:100349135 | missense | C/C | 6.66E-16 | 60  | 99 | 37 | 84 | 0/0 | 0/0 | 0/0 | match | match | match |
| 163383 | TruSeqV2    | 4:100349135 | missense | C/C | 4.44E-16 | 89  | 99 | 41 | 99 | 0/0 | 0/0 | 0/0 | match | match | match |
| 198564 | Agilent38MB | 4:100349135 | missense | C/C | 2.22E-15 | 109 | 99 | 42 | 99 | 0/0 | 0/0 | 0/0 | match | match | match |
| 108971 | TruSeqV2    | 4:100349669 | missense | C/C | 1.13E-14 | 203 | 99 | 30 | 87 | 0/0 | 0/0 | 0/0 | match | match | match |
| 115239 | TruSeqV2    | 4:100349669 | missense | G/C | 2.24E-14 | 115 | 99 | 36 | 99 | 0/1 | 0/1 | 0/1 | match | match | match |
| 132306 | Agilent38MB | 4:100349669 | missense | C/C | 8.88E-15 | 418 | 99 | 31 | 77 | 0/0 | 0/0 | 0/0 | match | match | match |
| 163383 | TruSeqV2    | 4:100349669 | missense | C/C | 2.22E-15 | 188 | 99 | 38 | 99 | 0/0 | 0/0 | 0/0 | match | match | match |
| 198564 | Agilent38MB | 4:100349669 | missense | C/C | 3.31E-14 | 779 | 99 | 32 | 81 | 0/0 | 0/0 | 0/0 | match | match | match |
| 108971 | TruSeqV2    | 4:115544609 | synon    | G/G | 2.66E-15 | 74  | 99 | 50 | 99 | 0/0 | 0/0 | 0/0 | match | match | match |
| 115239 | TruSeqV2    | 4:115544609 | synon    | G/G | 8.88E-16 | 39  | 96 | 43 | 99 | 0/0 | 0/0 | 0/0 | match | match | match |
| 132306 | Agilent38MB | 4:115544609 | synon    | G/G | 6.66E-16 | 110 | 99 | 38 | 96 | 0/0 | 0/0 | 0/0 | match | match | match |
| 163383 | TruSeqV2    | 4:115544609 | synon    | G/G | 5.77E-15 | 77  | 99 | 39 | 96 | 0/0 | 0/0 | 0/0 | match | match | match |
| 198564 | Agilent38MB | 4:115544609 | synon    | G/G | 6.66E-16 | 202 | 99 | 53 | 99 | 0/0 | 0/0 | 0/0 | match | match | match |
| 108971 | TruSeqV2    | 4:115544713 | missense | C/C | 4.44E-16 | 37  | 90 | 42 | 99 | 0/0 | 0/0 | 0/0 | match | match | match |
| 115239 | TruSeqV2    | 4:115544713 | missense | C/C | 2.22E-16 | 35  | 84 | 38 | 96 | 0/0 | 0/0 | 0/0 | match | match | match |
| 132306 | Agilent38MB | 4:115544713 | missense | C/C | 2.22E-16 | 102 | 99 | 31 | 84 | 0/0 | 0/0 | 0/0 | match | match | match |
| 163383 | TruSeqV2    | 4:115544713 | missense | C/C | 2.22E-16 | 55  | 99 | 29 | 75 | 0/0 | 0/0 | 0/0 | match | match | match |
| 198564 | Agilent38MB | 4:115544713 | missense | C/C | 4.44E-16 | 177 | 99 | 48 | 99 | 0/0 | 0/0 | 0/0 | match | match | match |
| 108971 | TruSeqV2    | 4:115544714 | synon    | G/G | 2.22E-16 | 40  | 99 | 37 | 99 | 1/1 | 1/1 | 1/1 | match | match | match |
| 115239 | TruSeqV2    | 4:115544714 | synon    | G/G | 2.22E-16 | 34  | 99 | 36 | 99 | 1/1 | 1/1 | 1/1 | match | match | match |
| 132306 | Agilent38MB | 4:115544714 | synon    | G/G | 2.22E-16 | 98  | 99 | 29 | 87 | 1/1 | 1/1 | 1/1 | match | match | match |
| 163383 | TruSeqV2    | 4:115544714 | synon    | G/G | 2.22E-16 | 51  | 99 | 31 | 92 | 1/1 | 1/1 | 1/1 | match | match | match |
| 198564 | Agilent38MB | 4:115544714 | synon    | G/G | 2.22E-16 | 174 | 99 | 45 | 99 | 1/1 | 1/1 | 1/1 | match | match | match |
| 108971 | TruSeqV2    | 4:115544777 | synon    | A/A | 2.22E-16 | 31  | 69 | 31 | 61 | 0/0 | 0/0 | 0/0 | match | match | match |

|        |             |             |          |     |          |     |    |    |    |     |     |     |       |       |       |
|--------|-------------|-------------|----------|-----|----------|-----|----|----|----|-----|-----|-----|-------|-------|-------|
| 115239 | TruSeqV2    | 4:115544777 | synon    | A/A | 1.11E-15 | 19  | 51 | 29 | 84 | 0/0 | 0/0 | 0/0 | match | match | match |
| 132306 | Agilent38MB | 4:115544777 | synon    | A/A | 6.66E-16 | 107 | 99 | 30 | 79 | 0/0 | 0/0 | 0/0 | match | match | match |
| 163383 | TruSeqV2    | 4:115544777 | synon    | A/A | 8.88E-16 | 24  | 63 | 38 | 99 | 0/0 | 0/0 | 0/0 | match | match | match |
| 198564 | Agilent38MB | 4:115544777 | synon    | A/A | 6.66E-16 | 200 | 99 | 37 | 81 | 0/0 | 0/0 | 0/0 | match | match | match |
| 108971 | TruSeqV2    | 4:115589302 | missense | G/G | 4.44E-16 | 50  | 99 | 39 | 99 | 1/1 | 1/1 | 1/1 | match | match | match |
| 115239 | TruSeqV2    | 4:115589302 | missense | G/G | 6.66E-16 | 50  | 99 | 38 | 99 | 1/1 | 1/1 | 1/1 | match | match | match |
| 132306 | Agilent38MB | 4:115589302 | missense | G/G | 2.22E-16 | 156 | 99 | 40 | 99 | 1/1 | 1/1 | 1/1 | match | match | match |
| 163383 | TruSeqV2    | 4:115589302 | missense | G/G | 4.44E-16 | 48  | 99 | 42 | 99 | 1/1 | 1/1 | 1/1 | match | match | match |
| 198564 | Agilent38MB | 4:115589302 | missense | G/G | 8.88E-16 | 340 | 99 | 48 | 99 | 1/1 | 1/1 | 1/1 | match | match | match |
| 108971 | TruSeqV2    | 4:69403588  | missense | G/G | 2.00E-15 | 88  | 99 | 40 | 99 | 0/0 | 0/0 | 0/0 | match | match | match |
| 115239 | TruSeqV2    | 4:69403588  | missense | G/G | 4.88E-15 | 29  | 72 | 25 | 69 | 0/0 | 0/0 | 0/0 | match | match | match |
| 132306 | Agilent38MB | 4:69403588  | missense | G/G | 1.78E-15 | 63  | 99 | 20 | 54 | 0/0 | 0/0 | 0/0 | match | match | match |
| 163383 | TruSeqV2    | 4:69403588  | missense | G/G | 2.89E-15 | 76  | 99 | 54 | 99 | 0/0 | 0/0 | 0/0 | match | match | match |
| 198564 | Agilent38MB | 4:69403588  | missense | G/G | 2.00E-15 | 86  | 99 | 23 | 66 | 0/0 | 0/0 | 0/0 | match | match | match |
| 108971 | TruSeqV2    | 4:69417570  | synon    | G/G | 5.36E-11 | 41  | 99 | 38 | 99 | 1/1 | 1/1 | 1/1 | match | match | match |
| 115239 | TruSeqV2    | 4:69417570  | synon    | G/G | 4.69E-09 | 12  | 36 | 19 | 57 | 1/1 | 1/1 | 1/1 | match | match | match |
| 132306 | Agilent38MB | 4:69417570  | synon    | G/G | 1.64E-10 | 71  | 99 | 14 | 42 | 1/1 | 1/1 | 1/1 | match | match | match |
| 163383 | TruSeqV2    | 4:69417570  | synon    | G/G | 3.42E-10 | 37  | 99 | 36 | 99 | 1/1 | 1/1 | 1/1 | match | match | match |
| 108971 | TruSeqV2    | 4:69512637  | 3'UTR    | T/T | 2.44E-15 | 69  | 33 | 48 | 21 | 0/0 | 0/0 | 0/0 | match | match | match |
| 115239 | TruSeqV2    | 4:69512637  | 3'UTR    | T/T | 4.44E-16 | 39  | 27 | 47 | 33 | 0/0 | 0/0 | 0/0 | match | match | match |
| 163383 | TruSeqV2    | 4:69512637  | 3'UTR    | T/T | 6.66E-16 | 70  | 27 | 50 | 30 | 0/0 | 0/0 | 0/0 | match | match | match |
| 108971 | TruSeqV2    | 4:69512847  | missense | G/G | 4.27E-13 | 105 | 99 | 48 | 99 | 1/1 | 1/1 | 1/1 | match | match | match |
| 115239 | TruSeqV2    | 4:69512847  | missense | T/G | 2.84E-07 | 78  | 99 | 40 | 99 | 0/1 | 0/1 | 0/1 | match | match | match |
| 132306 | Agilent38MB | 4:69512847  | missense | G/G | 1.09E-13 | 145 | 99 | 38 | 99 | 1/1 | 1/1 | 1/1 | match | match | match |
| 163383 | TruSeqV2    | 4:69512847  | missense | T/G | 5.15E-08 | 94  | 99 | 43 | 99 | 0/1 | 0/1 | 0/1 | match | match | match |
| 198564 | Agilent38MB | 4:69512847  | missense | T/G | 1.05E-06 | 293 | 99 | 49 | 99 | 0/1 | 0/1 | 0/1 | match | match | match |
| 108971 | TruSeqV2    | 4:69512917  | missense | C/C | 6.66E-16 | 149 | 99 | 34 | 93 | 0/0 | 0/0 | 0/0 | match | match | match |
| 115239 | TruSeqV2    | 4:69512917  | missense | C/C | 4.44E-16 | 96  | 99 | 39 | 99 | 0/0 | 0/0 | 0/0 | match | match | match |
| 132306 | Agilent38MB | 4:69512917  | missense | C/C | 6.66E-16 | 143 | 99 | 45 | 99 | 0/0 | 0/0 | 0/0 | match | match | match |
| 163383 | TruSeqV2    | 4:69512917  | missense | C/C | 2.22E-16 | 134 | 99 | 44 | 99 | 0/0 | 0/0 | 0/0 | match | match | match |
| 198564 | Agilent38MB | 4:69512917  | missense | C/C | 4.66E-15 | 280 | 99 | 32 | 68 | 0/0 | 0/0 | 0/0 | match | match | match |
| 108971 | TruSeqV2    | 4:69536084  | missense | C/A | 1.55E-15 | 62  | 99 | 63 | 99 | 0/1 | 0/1 | 0/1 | match | match | match |
| 115239 | TruSeqV2    | 4:69536084  | missense | C/A | 8.88E-16 | 41  | 99 | 55 | 99 | 0/1 | 0/1 | 0/1 | match | match | match |
| 132306 | Agilent38MB | 4:69536084  | missense | A/A | 4.00E-15 | 39  | 99 | 52 | 99 | 0/0 | 0/0 | 0/0 | match | match | match |
| 163383 | TruSeqV2    | 4:69536084  | missense | A/A | 2.22E-15 | 57  | 99 | 44 | 99 | 0/0 | 0/0 | 0/0 | match | match | match |
| 198564 | Agilent38MB | 4:69536084  | missense | C/A | 2.89E-15 | 66  | 99 | 63 | 99 | 0/1 | 0/1 | 0/1 | match | match | match |
| 108971 | TruSeqV2    | 4:69962078  | promoter | C/C | 6.66E-16 | 20  | 60 | 35 | 99 | 1/1 | 1/1 | 1/1 | match | match | match |
| 115239 | TruSeqV2    | 4:69962078  | promoter | C/T | 6.66E-16 | 15  | 99 | 44 | 99 | 0/1 | 0/1 | 0/1 | match | match | match |

|        |             |            |          |     |          |     |    |    |    |     |     |     |       |       |       |
|--------|-------------|------------|----------|-----|----------|-----|----|----|----|-----|-----|-----|-------|-------|-------|
| 132306 | Agilent38MB | 4:69962078 | promoter | C/C | 6.66E-16 | 8   | 24 | 29 | 87 | 1/1 | 1/1 | 1/1 | match | match | match |
| 163383 | TruSeqV2    | 4:69962078 | promoter | C/C | 8.88E-16 | 17  | 51 | 33 | 99 | 1/1 | 1/1 | 1/1 | match | match | match |
| 198564 | Agilent38MB | 4:69962078 | promoter | C/T | 6.66E-16 | 10  | 99 | 48 | 99 | 0/1 | 0/1 | 0/1 | match | match | match |
| 108971 | TruSeqV2    | 4:69962449 | missense | G/G | 4.44E-16 | 231 | 99 | 40 | 99 | 0/0 | 0/0 | 0/0 | match | match | match |
| 115239 | TruSeqV2    | 4:69962449 | missense | G/G | 4.44E-16 | 155 | 99 | 51 | 99 | 0/0 | 0/0 | 0/0 | match | match | match |
| 132306 | Agilent38MB | 4:69962449 | missense | G/G | 4.44E-16 | 108 | 99 | 39 | 99 | 0/0 | 0/0 | 0/0 | match | match | match |
| 163383 | TruSeqV2    | 4:69962449 | missense | G/G | 4.44E-16 | 196 | 99 | 26 | 72 | 0/0 | 0/0 | 0/0 | match | match | match |
| 198564 | Agilent38MB | 4:69962449 | missense | G/G | 4.44E-16 | 155 | 99 | 51 | 99 | 0/0 | 0/0 | 0/0 | match | match | match |
| 108971 | TruSeqV2    | 4:69964271 | synon    | A/G | 1.55E-14 | 51  | 99 | 36 | 99 | 0/1 | 0/1 | 0/1 | match | match | match |
| 115239 | TruSeqV2    | 4:69964271 | synon    | A/A | 1.11E-15 | 39  | 99 | 36 | 96 | 0/0 | 0/0 | 0/0 | match | match | match |
| 132306 | Agilent38MB | 4:69964271 | synon    | A/A | 1.11E-15 | 193 | 99 | 37 | 99 | 0/0 | 0/0 | 0/0 | match | match | match |
| 163383 | TruSeqV2    | 4:69964271 | synon    | A/A | 1.33E-15 | 49  | 99 | 45 | 99 | 0/0 | 0/0 | 0/0 | match | match | match |
| 198564 | Agilent38MB | 4:69964271 | synon    | A/A | 2.00E-15 | 273 | 99 | 33 | 87 | 0/0 | 0/0 | 0/0 | match | match | match |
| 108971 | TruSeqV2    | 4:69964337 | synon    | T/T | 5.05E-06 | 125 | 99 | 41 | 99 | 1/1 | 1/1 | 1/1 | match | match | match |
| 115239 | TruSeqV2    | 4:69964337 | synon    | A/T | 7.12E-05 | 78  | 99 | 29 | 99 | 0/1 | 0/1 | 0/1 | match | match | match |
| 132306 | Agilent38MB | 4:69964337 | synon    | T/T | 3.40E-06 | 281 | 99 | 47 | 99 | 1/1 | 1/1 | 1/1 | match | match | match |
| 163383 | TruSeqV2    | 4:69964337 | synon    | T/T | 7.98E-07 | 102 | 99 | 29 | 87 | 1/1 | 1/1 | 1/1 | match | match | match |
| 198564 | Agilent38MB | 4:69964337 | synon    | A/T | 3.60E-06 | 417 | 99 | 36 | 99 | 0/1 | 0/1 | 0/1 | match | match | match |
| 108971 | TruSeqV2    | 4:69964338 | missense | C/C | 8.88E-16 | 127 | 99 | 41 | 99 | 1/1 | 1/1 | 1/1 | match | match | match |
| 115239 | TruSeqV2    | 4:69964338 | missense | C/T | 5.75E-07 | 79  | 99 | 29 | 99 | 0/1 | 0/1 | 0/1 | match | match | match |
| 132306 | Agilent38MB | 4:69964338 | missense | C/C | 1.78E-15 | 281 | 99 | 45 | 99 | 1/1 | 1/1 | 1/1 | match | match | match |
| 163383 | TruSeqV2    | 4:69964338 | missense | C/C | 1.55E-15 | 101 | 99 | 28 | 87 | 1/1 | 1/1 | 1/1 | match | match | match |
| 198564 | Agilent38MB | 4:69964338 | missense | C/T | 1.00E-08 | 424 | 99 | 36 | 99 | 0/1 | 0/1 | 0/1 | match | match | match |
| 115239 | TruSeqV2    | 4:69972952 | synon    | C/C | 7.06E-13 | 56  | 99 | 51 | 67 | 0/0 | 0/0 | 0/0 | match | match | match |
| 132306 | Agilent38MB | 4:69972952 | synon    | C/C | 6.66E-16 | 195 | 99 | 39 | 99 | 0/0 | 0/0 | 0/0 | match | match | match |
| 163383 | TruSeqV2    | 4:69972952 | synon    | C/C | 1.33E-15 | 77  | 99 | 52 | 99 | 0/0 | 0/0 | 0/0 | match | match | match |
| 198564 | Agilent38MB | 4:69972952 | synon    | C/C | 2.22E-16 | 438 | 99 | 54 | 99 | 0/0 | 0/0 | 0/0 | match | match | match |
| 108971 | TruSeqV2    | 4:70066319 | synon    | G/G | 2.22E-16 | 271 | 99 | 48 | 99 | 0/0 | 0/0 | 0/0 | match | match | match |
| 115239 | TruSeqV2    | 4:70066319 | synon    | G/G | 2.04E-14 | 171 | 99 | 45 | 99 | 0/0 | 0/0 | 0/0 | match | match | match |
| 132306 | Agilent38MB | 4:70066319 | synon    | G/G | 2.22E-16 | 237 | 99 | 26 | 69 | 0/0 | 0/0 | 0/0 | match | match | match |
| 163383 | TruSeqV2    | 4:70066319 | synon    | G/G | 4.00E-14 | 255 | 99 | 34 | 93 | 0/0 | 0/0 | 0/0 | match | match | match |
| 198564 | Agilent38MB | 4:70066319 | synon    | G/G | 2.98E-07 | 409 | 99 | 45 | 99 | 0/0 | 0/0 | 0/0 | match | match | match |
| 108971 | TruSeqV2    | 4:70070366 | synon    | A/A | 2.22E-16 | 105 | 99 | 44 | 99 | 0/0 | 0/0 | 0/0 | match | match | match |
| 115239 | TruSeqV2    | 4:70070366 | synon    | A/A | 2.22E-16 | 61  | 99 | 10 | 30 | 0/0 | 0/0 | 0/0 | match | match | match |
| 132306 | Agilent38MB | 4:70070366 | synon    | A/A | 5.11E-15 | 46  | 99 | 43 | 99 | 0/0 | 0/0 | 0/0 | match | match | match |
| 163383 | TruSeqV2    | 4:70070366 | synon    | A/A | 2.22E-15 | 92  | 99 | 39 | 99 | 0/0 | 0/0 | 0/0 | match | match | match |
| 198564 | Agilent38MB | 4:70070366 | synon    | A/A | 2.22E-16 | 60  | 99 | 43 | 99 | 0/0 | 0/0 | 0/0 | match | match | match |
| 108971 | TruSeqV2    | 4:70070367 | missense | C/C | 2.22E-16 | 104 | 99 | 41 | 99 | 0/0 | 0/0 | 0/0 | match | match | match |

|        |             |            |          |     |          |     |    |    |    |     |     |     |       |       |       |
|--------|-------------|------------|----------|-----|----------|-----|----|----|----|-----|-----|-----|-------|-------|-------|
| 115239 | TruSeqV2    | 4:70070367 | missense | C/C | 4.44E-16 | 60  | 99 | 11 | 33 | 0/0 | 0/0 | 0/0 | match | match | match |
| 132306 | Agilent38MB | 4:70070367 | missense | C/C | 2.22E-16 | 45  | 99 | 43 | 99 | 0/0 | 0/0 | 0/0 | match | match | match |
| 163383 | TruSeqV2    | 4:70070367 | missense | C/C | 2.22E-16 | 93  | 99 | 37 | 99 | 0/0 | 0/0 | 0/0 | match | match | match |
| 198564 | Agilent38MB | 4:70070367 | missense | C/C | 7.11E-15 | 59  | 99 | 44 | 99 | 0/0 | 0/0 | 0/0 | match | match | match |
| 108971 | TruSeqV2    | 4:70078295 | missense | G/G | 4.44E-16 | 136 | 99 | 41 | 99 | 0/0 | 0/0 | 0/0 | match | match | match |
| 115239 | TruSeqV2    | 4:70078295 | missense | G/G | 1.93E-13 | 82  | 99 | 34 | 84 | 0/0 | 0/0 | 0/0 | match | match | match |
| 132306 | Agilent38MB | 4:70078295 | missense | G/G | 6.66E-16 | 304 | 99 | 27 | 60 | 0/0 | 0/0 | 0/0 | match | match | match |
| 163383 | TruSeqV2    | 4:70078295 | missense | G/G | 2.66E-15 | 103 | 99 | 43 | 99 | 0/0 | 0/0 | 0/0 | match | match | match |
| 198564 | Agilent38MB | 4:70078295 | missense | G/G | 4.53E-14 | 483 | 99 | 40 | 84 | 0/0 | 0/0 | 0/0 | match | match | match |
| 108971 | TruSeqV2    | 4:70079975 | missense | G/A | 6.66E-16 | 218 | 99 | 55 | 99 | 0/1 | 0/1 | 0/1 | match | match | match |
| 115239 | TruSeqV2    | 4:70079975 | missense | A/A | 6.66E-16 | 150 | 99 | 49 | 99 | 0/0 | 0/0 | 0/0 | match | match | match |
| 132306 | Agilent38MB | 4:70079975 | missense | A/A | 4.44E-16 | 243 | 99 | 36 | 99 | 0/0 | 0/0 | 0/0 | match | match | match |
| 163383 | TruSeqV2    | 4:70079975 | missense | A/A | 6.66E-16 | 198 | 99 | 37 | 93 | 0/0 | 0/0 | 0/0 | match | match | match |
| 198564 | Agilent38MB | 4:70079975 | missense | A/A | 8.22E-15 | 411 | 99 | 56 | 99 | 0/0 | 0/0 | 0/0 | match | match | match |
| 108971 | TruSeqV2    | 4:70160259 | missense | A/A | 4.44E-16 | 45  | 99 | 36 | 90 | 0/0 | 0/0 | 0/0 | match | match | match |
| 115239 | TruSeqV2    | 4:70160259 | missense | A/A | 6.66E-16 | 92  | 99 | 37 | 93 | 0/0 | 0/0 | 0/0 | match | match | match |
| 132306 | Agilent38MB | 4:70160259 | missense | A/A | 6.66E-16 | 29  | 84 | 23 | 57 | 0/0 | 0/0 | 0/0 | match | match | match |
| 163383 | TruSeqV2    | 4:70160259 | missense | A/A | 4.44E-16 | 79  | 99 | 40 | 99 | 0/0 | 0/0 | 0/0 | match | match | match |
| 198564 | Agilent38MB | 4:70160259 | missense | A/A | 6.66E-16 | 68  | 99 | 62 | 99 | 0/0 | 0/0 | 0/0 | match | match | match |
| 108971 | TruSeqV2    | 4:70345904 | 3'UTR    | T/T | 1.11E-15 | 52  | 99 | 36 | 99 | 1/1 | 1/1 | 1/1 | match | match | match |
| 115239 | TruSeqV2    | 4:70345904 | 3'UTR    | T/C | 1.55E-15 | 35  | 99 | 41 | 99 | 0/1 | 0/1 | 0/1 | match | match | match |
| 163383 | TruSeqV2    | 4:70345904 | 3'UTR    | T/C | 2.22E-15 | 56  | 99 | 43 | 99 | 0/1 | 0/1 | 0/1 | match | match | match |
| 108971 | TruSeqV2    | 4:70346057 | 3'UTR    | T/T | 2.22E-16 | 127 | 99 | 50 | 99 | 0/0 | 0/0 | 0/0 | match | match | match |
| 115239 | TruSeqV2    | 4:70346057 | 3'UTR    | T/T | 8.88E-16 | 64  | 99 | 50 | 99 | 0/0 | 0/0 | 0/0 | match | match | match |
| 163383 | TruSeqV2    | 4:70346057 | 3'UTR    | T/T | 6.66E-16 | 97  | 99 | 50 | 99 | 0/0 | 0/0 | 0/0 | match | match | match |
| 108971 | TruSeqV2    | 4:70346127 | 3'UTR    | A/A | 6.66E-16 | 99  | 99 | 44 | 99 | 0/0 | 0/0 | 0/0 | match | match | match |
| 115239 | TruSeqV2    | 4:70346127 | 3'UTR    | A/A | 1.11E-15 | 66  | 99 | 43 | 99 | 0/0 | 0/0 | 0/0 | match | match | match |
| 163383 | TruSeqV2    | 4:70346127 | 3'UTR    | A/A | 6.66E-16 | 98  | 99 | 44 | 99 | 0/0 | 0/0 | 0/0 | match | match | match |
| 108971 | TruSeqV2    | 4:70346564 | synon    | G/G | 4.44E-16 | 176 | 99 | 38 | 99 | 0/0 | 0/0 | 0/0 | match | match | match |
| 115239 | TruSeqV2    | 4:70346564 | synon    | T/G | 7.15E-14 | 118 | 99 | 29 | 99 | 0/1 | 0/1 | 0/1 | match | match | match |
| 132306 | Agilent38MB | 4:70346564 | synon    | T/G | 2.66E-11 | 154 | 99 | 32 | 99 | 0/1 | 0/1 | 0/1 | match | match | match |
| 163383 | TruSeqV2    | 4:70346564 | synon    | T/G | 1.36E-12 | 172 | 99 | 34 | 99 | 0/1 | 0/1 | 0/1 | match | match | match |
| 198564 | Agilent38MB | 4:70346564 | synon    | T/T | 1.60E-13 | 214 | 99 | 46 | 99 | 1/1 | 1/1 | 1/1 | match | match | match |
| 108971 | TruSeqV2    | 4:70346565 | missense | A/A | 1.11E-15 | 176 | 99 | 38 | 99 | 0/0 | 0/0 | 0/0 | match | match | match |
| 115239 | TruSeqV2    | 4:70346565 | missense | T/A | 2.89E-15 | 118 | 99 | 29 | 99 | 0/1 | 0/1 | 0/1 | match | match | match |
| 132306 | Agilent38MB | 4:70346565 | missense | T/A | 1.95E-13 | 152 | 99 | 33 | 99 | 0/1 | 0/1 | 0/1 | match | match | match |
| 163383 | TruSeqV2    | 4:70346565 | missense | T/A | 2.57E-13 | 168 | 99 | 34 | 99 | 0/1 | 0/1 | 0/1 | match | match | match |
| 198564 | Agilent38MB | 4:70346565 | missense | T/T | 3.57E-13 | 212 | 99 | 46 | 99 | 1/1 | 1/1 | 1/1 | match | match | match |

|        |             |            |          |     |          |     |    |    |    |     |     |     |       |       |       |
|--------|-------------|------------|----------|-----|----------|-----|----|----|----|-----|-----|-----|-------|-------|-------|
| 108971 | TruSeqV2    | 4:70351050 | missense | A/A | 2.22E-16 | 163 | 99 | 46 | 99 | 0/0 | 0/0 | 0/0 | match | match | match |
| 115239 | TruSeqV2    | 4:70351050 | missense | A/A | 2.22E-16 | 114 | 99 | 42 | 99 | 0/0 | 0/0 | 0/0 | match | match | match |
| 132306 | Agilent38MB | 4:70351050 | missense | A/A | 4.44E-16 | 263 | 99 | 34 | 96 | 0/0 | 0/0 | 0/0 | match | match | match |
| 163383 | TruSeqV2    | 4:70351050 | missense | A/A | 4.44E-16 | 135 | 99 | 44 | 99 | 0/0 | 0/0 | 0/0 | match | match | match |
| 198564 | Agilent38MB | 4:70351050 | missense | A/A | 2.22E-16 | 453 | 99 | 36 | 90 | 0/0 | 0/0 | 0/0 | match | match | match |
| 108971 | TruSeqV2    | 4:70355211 | synon    | C/C | 8.88E-16 | 122 | 99 | 36 | 99 | 1/1 | 1/1 | 1/1 | match | match | match |
| 115239 | TruSeqV2    | 4:70355211 | synon    | C/C | 8.44E-15 | 57  | 99 | 35 | 99 | 1/1 | 1/1 | 1/1 | match | match | match |
| 132306 | Agilent38MB | 4:70355211 | synon    | C/C | 8.88E-16 | 274 | 99 | 29 | 87 | 1/1 | 1/1 | 1/1 | match | match | match |
| 163383 | TruSeqV2    | 4:70355211 | synon    | C/C | 2.00E-15 | 89  | 99 | 34 | 99 | 1/1 | 1/1 | 1/1 | match | match | match |
| 198564 | Agilent38MB | 4:70355211 | synon    | C/C | 5.70E-13 | 551 | 99 | 45 | 99 | 1/1 | 1/1 | 1/1 | match | match | match |
| 108971 | TruSeqV2    | 4:70454991 | 3'UTR    | C/C | 4.44E-16 | 70  | 99 | 50 | 99 | 0/0 | 0/0 | 0/0 | match | match | match |
| 115239 | TruSeqV2    | 4:70454991 | 3'UTR    | C/C | 1.11E-15 | 59  | 99 | 49 | 99 | 0/0 | 0/0 | 0/0 | match | match | match |
| 163383 | TruSeqV2    | 4:70454991 | 3'UTR    | C/C | 6.66E-16 | 70  | 99 | 35 | 86 | 0/0 | 0/0 | 0/0 | match | match | match |
| 108971 | TruSeqV2    | 4:70455150 | synon    | T/T | 4.44E-16 | 73  | 99 | 63 | 99 | 0/0 | 0/0 | 0/0 | match | match | match |
| 115239 | TruSeqV2    | 4:70455150 | synon    | T/T | 6.66E-16 | 60  | 99 | 50 | 99 | 0/0 | 0/0 | 0/0 | match | match | match |
| 132306 | Agilent38MB | 4:70455150 | synon    | T/T | 2.22E-16 | 73  | 99 | 52 | 99 | 0/0 | 0/0 | 0/0 | match | match | match |
| 163383 | TruSeqV2    | 4:70455150 | synon    | T/T | 4.44E-16 | 67  | 99 | 57 | 99 | 0/0 | 0/0 | 0/0 | match | match | match |
| 198564 | Agilent38MB | 4:70455150 | synon    | T/T | 2.66E-15 | 106 | 99 | 50 | 99 | 0/0 | 0/0 | 0/0 | match | match | match |
| 108971 | TruSeqV2    | 4:70455478 | intronic | T/T | 4.44E-16 | 10  | 30 | 57 | 99 | 1/1 | 1/1 | 1/1 | match | match | match |
| 163383 | TruSeqV2    | 4:70455478 | intronic | T/T | 6.66E-16 | 5   | 15 | 55 | 99 | 1/1 | 1/1 | 1/1 | match | match | match |
| 108971 | TruSeqV2    | 4:70460328 | missense | T/C | 7.77E-15 | 58  | 99 | 35 | 99 | 0/1 | 0/1 | 0/1 | match | match | match |
| 115239 | TruSeqV2    | 4:70460328 | missense | C/C | 8.88E-16 | 24  | 60 | 32 | 93 | 0/0 | 0/0 | 0/0 | match | match | match |
| 132306 | Agilent38MB | 4:70460328 | missense | C/C | 1.11E-15 | 102 | 99 | 22 | 66 | 0/0 | 0/0 | 0/0 | match | match | match |
| 163383 | TruSeqV2    | 4:70460328 | missense | C/C | 6.66E-16 | 47  | 99 | 35 | 99 | 0/0 | 0/0 | 0/0 | match | match | match |
| 198564 | Agilent38MB | 4:70460328 | missense | C/C | 8.88E-16 | 204 | 99 | 33 | 99 | 0/0 | 0/0 | 0/0 | match | match | match |
| 108971 | TruSeqV2    | 4:70462042 | missense | C/C | 1.32E-13 | 33  | 99 | 44 | 99 | 0/0 | 0/0 | 0/0 | match | match | match |
| 115239 | TruSeqV2    | 4:70462042 | missense | C/C | 2.22E-15 | 18  | 54 | 40 | 99 | 0/0 | 0/0 | 0/0 | match | match | match |
| 132306 | Agilent38MB | 4:70462042 | missense | C/C | 1.33E-14 | 115 | 99 | 30 | 84 | 0/0 | 0/0 | 0/0 | match | match | match |
| 163383 | TruSeqV2    | 4:70462042 | missense | C/C | 2.11E-14 | 21  | 57 | 37 | 99 | 0/0 | 0/0 | 0/0 | match | match | match |
| 198564 | Agilent38MB | 4:70462042 | missense | C/C | 3.55E-15 | 212 | 99 | 63 | 99 | 0/0 | 0/0 | 0/0 | match | match | match |
| 108971 | TruSeqV2    | 4:70513139 | missense | T/T | 2.22E-16 | 87  | 99 | 48 | 99 | 1/1 | 1/1 | 1/1 | match | match | match |
| 115239 | TruSeqV2    | 4:70513139 | missense | T/T | 5.33E-15 | 56  | 99 | 45 | 99 | 1/1 | 1/1 | 1/1 | match | match | match |
| 132306 | Agilent38MB | 4:70513139 | missense | T/T | 2.00E-15 | 85  | 99 | 34 | 99 | 1/1 | 1/1 | 1/1 | match | match | match |
| 163383 | TruSeqV2    | 4:70513139 | missense | T/T | 1.55E-15 | 90  | 99 | 57 | 99 | 1/1 | 1/1 | 1/1 | match | match | match |
| 198564 | Agilent38MB | 4:70513139 | missense | T/T | 1.11E-15 | 175 | 99 | 34 | 99 | 1/1 | 1/1 | 1/1 | match | match | match |
| 108971 | TruSeqV2    | 4:70596385 | missense | T/T | 4.44E-16 | 55  | 99 | 45 | 99 | 0/0 | 0/0 | 0/0 | match | match | match |
| 115239 | TruSeqV2    | 4:70596385 | missense | T/T | 1.55E-15 | 34  | 87 | 45 | 99 | 0/0 | 0/0 | 0/0 | match | match | match |
| 132306 | Agilent38MB | 4:70596385 | missense | T/T | 2.22E-16 | 36  | 93 | 36 | 99 | 0/0 | 0/0 | 0/0 | match | match | match |

|        |             |            |          |     |          |     |    |    |    |     |     |     |       |       |       |
|--------|-------------|------------|----------|-----|----------|-----|----|----|----|-----|-----|-----|-------|-------|-------|
| 163383 | TruSeqV2    | 4:70596385 | missense | T/T | 1.55E-15 | 50  | 99 | 40 | 99 | 0/0 | 0/0 | 0/0 | match | match | match |
| 198564 | Agilent38MB | 4:70596385 | missense | T/T | 1.33E-15 | 61  | 99 | 74 | 99 | 0/0 | 0/0 | 0/0 | match | match | match |
| 108971 | TruSeqV2    | 4:70615488 | missense | T/T | 1.55E-15 | 112 | 99 | 50 | 99 | 0/0 | 0/0 | 0/0 | match | match | match |
| 115239 | TruSeqV2    | 4:70615488 | missense | T/T | 9.55E-15 | 83  | 99 | 57 | 99 | 0/0 | 0/0 | 0/0 | match | match | match |
| 132306 | Agilent38MB | 4:70615488 | missense | T/T | 2.18E-14 | 167 | 99 | 36 | 99 | 0/0 | 0/0 | 0/0 | match | match | match |
| 163383 | TruSeqV2    | 4:70615488 | missense | T/T | 9.10E-15 | 118 | 99 | 45 | 99 | 0/0 | 0/0 | 0/0 | match | match | match |
| 198564 | Agilent38MB | 4:70615488 | missense | T/T | 6.66E-16 | 297 | 99 | 57 | 99 | 0/0 | 0/0 | 0/0 | match | match | match |
| 108971 | TruSeqV2    | 4:70621074 | promoter | G/G | 3.75E-14 | 21  | 63 | 34 | 99 | 1/1 | 1/1 | 1/1 | match | match | match |
| 115239 | TruSeqV2    | 4:70621074 | promoter | A/A | 2.22E-16 | 13  | 30 | 51 | 99 | 0/0 | 0/0 | 0/0 | match | match | match |
| 163383 | TruSeqV2    | 4:70621074 | promoter | A/A | 2.22E-16 | 21  | 51 | 50 | 99 | 0/0 | 0/0 | 0/0 | match | match | match |
| 198564 | Agilent38MB | 4:70621074 | promoter | A/A | 1.33E-15 | 2   | 6  | 58 | 99 | 0/0 | 0/0 | 0/0 | match | match | match |
| 132306 | Agilent38MB | 4:70724053 | intronic | T/T | 2.22E-16 | 2   | 5  | 37 | 99 | 0/0 | 0/0 | 0/0 | match | match | match |
| 198564 | Agilent38MB | 4:70724053 | intronic | T/T | 1.33E-15 | 1   | 3  | 56 | 99 | 0/0 | 0/0 | 0/0 | match | match | match |
| 108971 | TruSeqV2    | 4:70725456 | intronic | G/G | 2.66E-15 | 1   | 3  | 39 | 99 | 0/0 | 0/0 | 0/0 | match | match | match |
| 108971 | TruSeqV2    | 4:70725821 | 5'UTR    | T/T | 1.51E-14 | 86  | 99 | 39 | 99 | 1/1 | 1/1 | 1/1 | match | match | match |
| 115239 | TruSeqV2    | 4:70725821 | 5'UTR    | C/C | 6.66E-16 | 78  | 99 | 40 | 99 | 0/0 | 0/0 | 0/0 | match | match | match |
| 163383 | TruSeqV2    | 4:70725821 | 5'UTR    | C/C | 8.88E-16 | 99  | 99 | 49 | 99 | 0/0 | 0/0 | 0/0 | match | match | match |
| 108971 | TruSeqV2    | 4:71859622 | missense | A/A | 2.22E-16 | 88  | 99 | 27 | 72 | 0/0 | 0/0 | 0/0 | match | match | match |
| 115239 | TruSeqV2    | 4:71859622 | missense | A/A | 2.22E-16 | 61  | 99 | 8  | 24 | 0/0 | 0/0 | 0/0 | match | match | match |
| 132306 | Agilent38MB | 4:71859622 | missense | A/A | 2.22E-16 | 60  | 99 | 20 | 57 | 0/0 | 0/0 | 0/0 | match | match | match |
| 163383 | TruSeqV2    | 4:71859622 | missense | A/A | 2.22E-16 | 70  | 99 | 20 | 51 | 0/0 | 0/0 | 0/0 | match | match | match |
| 198564 | Agilent38MB | 4:71859622 | missense | A/A | 4.44E-16 | 115 | 99 | 23 | 54 | 0/0 | 0/0 | 0/0 | match | match | match |
| 108971 | TruSeqV2    | 4:71888232 | missense | C/C | 4.44E-16 | 144 | 99 | 52 | 99 | 0/0 | 0/0 | 0/0 | match | match | match |
| 115239 | TruSeqV2    | 4:71888232 | missense | C/C | 8.88E-16 | 107 | 99 | 33 | 93 | 0/0 | 0/0 | 0/0 | match | match | match |
| 132306 | Agilent38MB | 4:71888232 | missense | C/C | 4.44E-16 | 112 | 99 | 40 | 99 | 0/0 | 0/0 | 0/0 | match | match | match |
| 163383 | TruSeqV2    | 4:71888232 | missense | C/C | 8.88E-16 | 130 | 99 | 35 | 96 | 0/0 | 0/0 | 0/0 | match | match | match |
| 198564 | Agilent38MB | 4:71888232 | missense | C/C | 4.44E-16 | 184 | 99 | 41 | 99 | 0/0 | 0/0 | 0/0 | match | match | match |
| 108971 | TruSeqV2    | 4:71888240 | missense | C/C | 2.22E-16 | 130 | 99 | 51 | 99 | 0/0 | 0/0 | 0/0 | match | match | match |
| 115239 | TruSeqV2    | 4:71888240 | missense | C/C | 4.44E-16 | 90  | 99 | 35 | 99 | 0/0 | 0/0 | 0/0 | match | match | match |
| 132306 | Agilent38MB | 4:71888240 | missense | C/C | 4.44E-16 | 111 | 99 | 36 | 94 | 0/0 | 0/0 | 0/0 | match | match | match |
| 163383 | TruSeqV2    | 4:71888240 | missense | C/C | 4.44E-16 | 124 | 99 | 38 | 99 | 0/0 | 0/0 | 0/0 | match | match | match |
| 198564 | Agilent38MB | 4:71888240 | missense | C/C | 1.33E-15 | 186 | 99 | 41 | 99 | 0/0 | 0/0 | 0/0 | match | match | match |
| 108971 | TruSeqV2    | 4:71895260 | 3'UTR    | T/T | 6.66E-16 | 35  | 99 | 43 | 99 | 1/1 | 1/1 | 1/1 | match | match | match |
| 115239 | TruSeqV2    | 4:71895260 | 3'UTR    | T/T | 1.55E-15 | 19  | 57 | 47 | 99 | 1/1 | 1/1 | 1/1 | match | match | match |
| 163383 | TruSeqV2    | 4:71895260 | 3'UTR    | T/T | 1.33E-15 | 35  | 99 | 45 | 99 | 1/1 | 1/1 | 1/1 | match | match | match |
| 108971 | TruSeqV2    | 4:74279326 | missense | G/G | 2.22E-16 | 25  | 63 | 49 | 99 | 0/0 | 0/0 | 0/0 | match | match | match |
| 115239 | TruSeqV2    | 4:74279326 | missense | G/G | 6.66E-16 | 32  | 75 | 51 | 99 | 0/0 | 0/0 | 0/0 | match | match | match |
| 132306 | Agilent38MB | 4:74279326 | missense | G/G | 4.44E-16 | 214 | 99 | 44 | 99 | 0/0 | 0/0 | 0/0 | match | match | match |



|        |             |            |          |     |          |     |    |    |    |     |     |     |       |       |       |
|--------|-------------|------------|----------|-----|----------|-----|----|----|----|-----|-----|-----|-------|-------|-------|
| 163383 | TruSeqV2    | 4:74279326 | missense | G/G | 2.00E-15 | 26  | 75 | 47 | 99 | 0/0 | 0/0 | 0/0 | match | match | match |
| 198564 | Agilent38MB | 4:74279326 | missense | G/G | 4.44E-16 | 379 | 99 | 54 | 99 | 0/0 | 0/0 | 0/0 | match | match | match |
| 108971 | TruSeqV2    | 4:74280857 | synon    | A/A | 4.44E-16 | 170 | 99 | 50 | 99 | 0/0 | 0/0 | 0/0 | match | match | match |
| 115239 | TruSeqV2    | 4:74280857 | synon    | A/A | 2.22E-16 | 93  | 99 | 55 | 99 | 0/0 | 0/0 | 0/0 | match | match | match |
| 132306 | Agilent38MB | 4:74280857 | synon    | A/A | 2.22E-16 | 151 | 99 | 45 | 99 | 0/0 | 0/0 | 0/0 | match | match | match |
| 163383 | TruSeqV2    | 4:74280857 | synon    | A/A | 4.44E-16 | 126 | 99 | 37 | 93 | 0/0 | 0/0 | 0/0 | match | match | match |
| 198564 | Agilent38MB | 4:74280857 | synon    | A/A | 8.88E-16 | 305 | 99 | 42 | 99 | 0/0 | 0/0 | 0/0 | match | match | match |
| 108971 | TruSeqV2    | 4:74281998 | missense | A/A | 2.22E-16 | 70  | 99 | 37 | 93 | 0/0 | 0/0 | 0/0 | match | match | match |
| 115239 | TruSeqV2    | 4:74281998 | missense | A/A | 2.22E-16 | 42  | 99 | 43 | 99 | 0/0 | 0/0 | 0/0 | match | match | match |
| 132306 | Agilent38MB | 4:74281998 | missense | A/A | 2.22E-16 | 53  | 99 | 32 | 84 | 0/0 | 0/0 | 0/0 | match | match | match |
| 163383 | TruSeqV2    | 4:74281998 | missense | A/A | 2.22E-16 | 41  | 99 | 47 | 99 | 0/0 | 0/0 | 0/0 | match | match | match |
| 198564 | Agilent38MB | 4:74281998 | missense | A/A | 2.00E-15 | 44  | 99 | 46 | 99 | 0/0 | 0/0 | 0/0 | match | match | match |
| 108971 | TruSeqV2    | 4:74283381 | missense | G/G | 7.11E-15 | 32  | 75 | 62 | 99 | 0/0 | 0/0 | 0/0 | match | match | match |
| 115239 | TruSeqV2    | 4:74283381 | missense | G/G | 1.22E-13 | 21  | 36 | 32 | 84 | 0/0 | 0/0 | 0/0 | match | match | match |
| 132306 | Agilent38MB | 4:74283381 | missense | G/G | 5.55E-15 | 38  | 57 | 35 | 96 | 0/0 | 0/0 | 0/0 | match | match | match |
| 163383 | TruSeqV2    | 4:74283381 | missense | G/G | 1.60E-14 | 33  | 78 | 47 | 99 | 0/0 | 0/0 | 0/0 | match | match | match |
| 198564 | Agilent38MB | 4:74283381 | missense | G/G | 1.78E-15 | 54  | 87 | 50 | 99 | 0/0 | 0/0 | 0/0 | match | match | match |
| 108971 | TruSeqV2    | 4:74283844 | missense | A/A | 6.66E-16 | 181 | 99 | 46 | 99 | 0/0 | 0/0 | 0/0 | match | match | match |
| 115239 | TruSeqV2    | 4:74283844 | missense | A/A | 6.66E-16 | 87  | 99 | 41 | 99 | 0/0 | 0/0 | 0/0 | match | match | match |
| 132306 | Agilent38MB | 4:74283844 | missense | A/A | 6.66E-16 | 144 | 99 | 49 | 99 | 0/0 | 0/0 | 0/0 | match | match | match |
| 163383 | TruSeqV2    | 4:74283844 | missense | A/A | 1.11E-15 | 155 | 99 | 47 | 99 | 0/0 | 0/0 | 0/0 | match | match | match |
| 198564 | Agilent38MB | 4:74283844 | missense | A/A | 1.55E-15 | 225 | 99 | 55 | 99 | 0/0 | 0/0 | 0/0 | match | match | match |
| 108971 | TruSeqV2    | 4:74283858 | synon    | T/T | 2.22E-16 | 199 | 99 | 43 | 99 | 0/0 | 0/0 | 0/0 | match | match | match |
| 115239 | TruSeqV2    | 4:74283858 | synon    | T/T | 2.22E-16 | 96  | 99 | 42 | 99 | 0/0 | 0/0 | 0/0 | match | match | match |
| 132306 | Agilent38MB | 4:74283858 | synon    | T/T | 2.22E-16 | 146 | 99 | 45 | 99 | 0/0 | 0/0 | 0/0 | match | match | match |
| 163383 | TruSeqV2    | 4:74283858 | synon    | T/T | 2.22E-16 | 154 | 99 | 45 | 99 | 0/0 | 0/0 | 0/0 | match | match | match |
| 198564 | Agilent38MB | 4:74283858 | synon    | T/T | 2.22E-16 | 246 | 99 | 46 | 99 | 0/0 | 0/0 | 0/0 | match | match | match |
| 108971 | TruSeqV2    | 4:89034649 | stop     | C/C | 2.22E-16 | 37  | 90 | 42 | 99 | 0/0 | 0/0 | 0/0 | match | match | match |
| 115239 | TruSeqV2    | 4:89034649 | stop     | C/C | 4.44E-16 | 24  | 66 | 45 | 99 | 0/0 | 0/0 | 0/0 | match | match | match |
| 132306 | Agilent38MB | 4:89034649 | stop     | C/C | 4.44E-16 | 139 | 99 | 31 | 84 | 0/0 | 0/0 | 0/0 | match | match | match |
| 163383 | TruSeqV2    | 4:89034649 | stop     | C/C | 2.22E-16 | 28  | 69 | 41 | 99 | 0/0 | 0/0 | 0/0 | match | match | match |
| 198564 | Agilent38MB | 4:89034649 | stop     | C/C | 4.44E-16 | 191 | 99 | 46 | 99 | 0/0 | 0/0 | 0/0 | match | match | match |
| 108971 | TruSeqV2    | 4:89039360 | missense | A/A | 2.22E-16 | 149 | 99 | 38 | 99 | 0/0 | 0/0 | 0/0 | match | match | match |
| 115239 | TruSeqV2    | 4:89039360 | missense | A/A | 6.66E-16 | 108 | 99 | 39 | 99 | 0/0 | 0/0 | 0/0 | match | match | match |
| 132306 | Agilent38MB | 4:89039360 | missense | A/A | 2.22E-16 | 109 | 99 | 29 | 72 | 0/0 | 0/0 | 0/0 | match | match | match |
| 163383 | TruSeqV2    | 4:89039360 | missense | A/A | 4.44E-16 | 131 | 99 | 39 | 96 | 0/0 | 0/0 | 0/0 | match | match | match |
| 198564 | Agilent38MB | 4:89039360 | missense | A/A | 1.78E-15 | 231 | 99 | 38 | 96 | 0/0 | 0/0 | 0/0 | match | match | match |
| 108971 | TruSeqV2    | 4:89042853 | missense | A/A | 6.66E-16 | 131 | 99 | 45 | 99 | 0/0 | 0/0 | 0/0 | match | match | match |

|        |             |             |          |     |          |     |    |    |    |     |     |     |       |       |       |
|--------|-------------|-------------|----------|-----|----------|-----|----|----|----|-----|-----|-----|-------|-------|-------|
| 115239 | TruSeqV2    | 4:89042853  | missense | A/A | 4.44E-16 | 79  | 99 | 35 | 81 | 0/0 | 0/0 | 0/0 | match | match | match |
| 132306 | Agilent38MB | 4:89042853  | missense | A/A | 8.88E-16 | 73  | 99 | 47 | 99 | 0/0 | 0/0 | 0/0 | match | match | match |
| 163383 | TruSeqV2    | 4:89042853  | missense | A/A | 8.88E-16 | 83  | 99 | 44 | 99 | 0/0 | 0/0 | 0/0 | match | match | match |
| 198564 | Agilent38MB | 4:89042853  | missense | A/A | 1.11E-15 | 139 | 99 | 47 | 99 | 0/0 | 0/0 | 0/0 | match | match | match |
| 108971 | TruSeqV2    | 4:89042912  | synon    | T/T | 2.22E-16 | 111 | 99 | 41 | 99 | 0/0 | 0/0 | 0/0 | match | match | match |
| 115239 | TruSeqV2    | 4:89042912  | synon    | T/T | 2.22E-16 | 64  | 99 | 36 | 90 | 0/0 | 0/0 | 0/0 | match | match | match |
| 132306 | Agilent38MB | 4:89042912  | synon    | T/T | 6.66E-16 | 155 | 99 | 43 | 99 | 0/0 | 0/0 | 0/0 | match | match | match |
| 163383 | TruSeqV2    | 4:89042912  | synon    | T/T | 4.44E-16 | 83  | 99 | 34 | 93 | 0/0 | 0/0 | 0/0 | match | match | match |
| 198564 | Agilent38MB | 4:89042912  | synon    | T/T | 4.44E-16 | 294 | 99 | 48 | 99 | 0/0 | 0/0 | 0/0 | match | match | match |
| 108971 | TruSeqV2    | 4:89052248  | missense | G/G | 8.88E-16 | 122 | 99 | 35 | 96 | 0/0 | 0/0 | 0/0 | match | match | match |
| 115239 | TruSeqV2    | 4:89052248  | missense | G/G | 2.22E-15 | 75  | 99 | 50 | 99 | 0/0 | 0/0 | 0/0 | match | match | match |
| 132306 | Agilent38MB | 4:89052248  | missense | G/G | 4.22E-15 | 300 | 99 | 27 | 69 | 0/0 | 0/0 | 0/0 | match | match | match |
| 163383 | TruSeqV2    | 4:89052248  | missense | G/G | 8.88E-16 | 103 | 99 | 35 | 99 | 0/0 | 0/0 | 0/0 | match | match | match |
| 198564 | Agilent38MB | 4:89052248  | missense | G/G | 1.11E-15 | 530 | 99 | 45 | 99 | 0/0 | 0/0 | 0/0 | match | match | match |
| 108971 | TruSeqV2    | 4:89052323  | missense | G/G | 2.22E-16 | 149 | 99 | 31 | 75 | 0/0 | 0/0 | 0/0 | match | match | match |
| 115239 | TruSeqV2    | 4:89052323  | missense | G/G | 2.22E-16 | 103 | 99 | 44 | 99 | 0/0 | 0/0 | 0/0 | match | match | match |
| 132306 | Agilent38MB | 4:89052323  | missense | G/G | 4.44E-16 | 184 | 99 | 25 | 75 | 0/0 | 0/0 | 0/0 | match | match | match |
| 163383 | TruSeqV2    | 4:89052323  | missense | G/G | 4.44E-16 | 125 | 99 | 43 | 91 | 0/0 | 0/0 | 0/0 | match | match | match |
| 198564 | Agilent38MB | 4:89052323  | missense | G/G | 4.44E-16 | 392 | 99 | 47 | 99 | 0/0 | 0/0 | 0/0 | match | match | match |
| 108971 | TruSeqV2    | 4:89052957  | stop     | G/G | 1.83E-12 | 105 | 99 | 43 | 99 | 0/0 | 0/0 | 0/0 | match | match | match |
| 115239 | TruSeqV2    | 4:89052957  | stop     | G/G | 1.60E-10 | 60  | 99 | 41 | 99 | 0/0 | 0/0 | 0/0 | match | match | match |
| 132306 | Agilent38MB | 4:89052957  | stop     | G/G | 1.55E-15 | 35  | 99 | 38 | 99 | 0/0 | 0/0 | 0/0 | match | match | match |
| 163383 | TruSeqV2    | 4:89052957  | stop     | G/G | 1.55E-11 | 76  | 99 | 41 | 99 | 0/0 | 0/0 | 0/0 | match | match | match |
| 198564 | Agilent38MB | 4:89052957  | stop     | G/G | 6.61E-07 | 63  | 99 | 44 | 99 | 0/0 | 0/0 | 0/0 | match | match | match |
| 108971 | TruSeqV2    | 4:89052964  | synon    | G/G | 1.07E-11 | 112 | 99 | 43 | 99 | 0/0 | 0/0 | 0/0 | match | match | match |
| 115239 | TruSeqV2    | 4:89052964  | synon    | G/G | 3.33E-14 | 67  | 99 | 40 | 99 | 0/0 | 0/0 | 0/0 | match | match | match |
| 132306 | Agilent38MB | 4:89052964  | synon    | G/G | 2.22E-14 | 38  | 99 | 37 | 99 | 0/0 | 0/0 | 0/0 | match | match | match |
| 163383 | TruSeqV2    | 4:89052964  | synon    | G/G | 5.57E-14 | 79  | 99 | 43 | 99 | 0/0 | 0/0 | 0/0 | match | match | match |
| 198564 | Agilent38MB | 4:89052964  | synon    | G/G | 1.44E-11 | 76  | 99 | 39 | 99 | 0/0 | 0/0 | 0/0 | match | match | match |
| 108971 | TruSeqV2    | 4:99997530  | missense | A/A | 4.44E-16 | 44  | 99 | 44 | 99 | 0/0 | 0/0 | 0/0 | match | match | match |
| 115239 | TruSeqV2    | 4:99997530  | missense | A/A | 8.88E-16 | 24  | 69 | 57 | 99 | 0/0 | 0/0 | 0/0 | match | match | match |
| 132306 | Agilent38MB | 4:99997530  | missense | A/A | 2.00E-15 | 23  | 63 | 39 | 99 | 0/0 | 0/0 | 0/0 | match | match | match |
| 163383 | TruSeqV2    | 4:99997530  | missense | A/A | 8.88E-16 | 51  | 99 | 44 | 99 | 0/0 | 0/0 | 0/0 | match | match | match |
| 198564 | Agilent38MB | 4:99997530  | missense | A/A | 2.44E-15 | 23  | 69 | 44 | 99 | 0/0 | 0/0 | 0/0 | match | match | match |
| 108971 | TruSeqV2    | 5:131649364 | synon    | C/C | 1.11E-15 | 115 | 99 | 44 | 99 | 0/0 | 0/0 | 0/0 | match | match | match |
| 115239 | TruSeqV2    | 5:131649364 | synon    | C/C | 4.44E-16 | 91  | 99 | 38 | 99 | 0/0 | 0/0 | 0/0 | match | match | match |
| 132306 | Agilent38MB | 5:131649364 | synon    | C/C | 1.11E-15 | 79  | 99 | 43 | 99 | 0/0 | 0/0 | 0/0 | match | match | match |
| 163383 | TruSeqV2    | 5:131649364 | synon    | C/C | 1.33E-15 | 101 | 99 | 46 | 99 | 0/0 | 0/0 | 0/0 | match | match | match |

|        |             |             |           |     |          |     |    |    |    |     |     |     |       |       |       |
|--------|-------------|-------------|-----------|-----|----------|-----|----|----|----|-----|-----|-----|-------|-------|-------|
| 198564 | Agilent38MB | 5:131649364 | synon     | C/C | 8.88E-16 | 144 | 99 | 36 | 99 | 0/0 | 0/0 | 0/0 | match | match | match |
| 108971 | TruSeqV2    | 5:131663062 | missense  | T/T | 2.22E-15 | 68  | 99 | 38 | 93 | 0/0 | 0/0 | 0/0 | match | match | match |
| 115239 | TruSeqV2    | 5:131663062 | missense  | C/T | 5.33E-15 | 33  | 99 | 43 | 99 | 0/1 | 0/1 | 0/1 | match | match | match |
| 132306 | Agilent38MB | 5:131663062 | missense  | C/C | 2.38E-14 | 89  | 99 | 32 | 62 | 1/1 | 1/1 | 1/1 | match | match | match |
| 163383 | TruSeqV2    | 5:131663062 | missense  | C/C | 2.00E-15 | 50  | 99 | 34 | 99 | 1/1 | 1/1 | 1/1 | match | match | match |
| 198564 | Agilent38MB | 5:131663062 | missense  | C/T | 1.49E-14 | 126 | 99 | 41 | 99 | 0/1 | 0/1 | 0/1 | match | match | match |
| 108971 | TruSeqV2    | 5:131667462 | stop/miss | T/T | 2.89E-15 | 103 | 99 | 39 | 99 | 0/0 | 0/0 | 0/0 | match | match | match |
| 115239 | TruSeqV2    | 5:131667462 | stop/miss | T/T | 6.66E-16 | 103 | 99 | 39 | 99 | 0/0 | 0/0 | 0/0 | match | match | match |
| 132306 | Agilent38MB | 5:131667462 | stop/miss | T/T | 3.77E-15 | 103 | 99 | 39 | 99 | 0/0 | 0/0 | 0/0 | match | match | match |
| 163383 | TruSeqV2    | 5:131667462 | stop/miss | T/T | 1.33E-15 | 103 | 99 | 39 | 99 | 0/0 | 0/0 | 0/0 | match | match | match |
| 198564 | Agilent38MB | 5:131667462 | stop/miss | T/T | 1.11E-15 | 103 | 99 | 39 | 99 | 0/0 | 0/0 | 0/0 | match | match | match |
| 108971 | TruSeqV2    | 5:131670546 | synon     | C/C | 8.08E-05 | 302 | 99 | 35 | 90 | 0/0 | 0/0 | 0/0 | match | match | match |
| 115239 | TruSeqV2    | 5:131670546 | synon     | C/G | 1.51E-07 | 176 | 99 | 41 | 99 | 0/1 | 0/1 | 0/1 | match | match | match |
| 132306 | Agilent38MB | 5:131670546 | synon     | G/G | 4.13E-14 | 63  | 99 | 30 | 89 | 1/1 | 1/1 | 1/1 | match | match | match |
| 163383 | TruSeqV2    | 5:131670546 | synon     | G/G | 8.44E-15 | 214 | 99 | 46 | 99 | 1/1 | 1/1 | 1/1 | match | match | match |
| 198564 | Agilent38MB | 5:131670546 | synon     | C/G | 1.49E-08 | 152 | 99 | 53 | 99 | 0/1 | 0/1 | 0/1 | match | match | match |
| 108971 | TruSeqV2    | 5:131671634 | missense  | G/G | 6.66E-16 | 83  | 99 | 28 | 78 | 0/0 | 0/0 | 0/0 | match | match | match |
| 115239 | TruSeqV2    | 5:131671634 | missense  | G/G | 2.22E-16 | 45  | 99 | 23 | 54 | 0/0 | 0/0 | 0/0 | match | match | match |
| 132306 | Agilent38MB | 5:131671634 | missense  | G/G | 2.22E-16 | 169 | 99 | 25 | 66 | 0/0 | 0/0 | 0/0 | match | match | match |
| 163383 | TruSeqV2    | 5:131671634 | missense  | G/G | 2.22E-16 | 51  | 99 | 38 | 99 | 0/0 | 0/0 | 0/0 | match | match | match |
| 198564 | Agilent38MB | 5:131671634 | missense  | G/G | 2.22E-16 | 329 | 99 | 34 | 90 | 0/0 | 0/0 | 0/0 | match | match | match |
| 108971 | TruSeqV2    | 5:131676320 | missense  | C/C | 4.44E-16 | 226 | 99 | 38 | 96 | 0/0 | 0/0 | 0/0 | match | match | match |
| 115239 | TruSeqV2    | 5:131676320 | missense  | C/C | 4.44E-16 | 141 | 99 | 48 | 99 | 0/0 | 0/0 | 0/0 | match | match | match |
| 132306 | Agilent38MB | 5:131676320 | missense  | T/T | 5.77E-15 | 52  | 99 | 32 | 96 | 1/1 | 1/1 | 1/1 | match | match | match |
| 163383 | TruSeqV2    | 5:131676320 | missense  | T/T | 1.47E-14 | 168 | 99 | 35 | 99 | 1/1 | 1/1 | 1/1 | match | match | match |
| 198564 | Agilent38MB | 5:131676320 | missense  | C/T | 1.54E-12 | 101 | 99 | 39 | 99 | 0/1 | 0/1 | 0/1 | match | match | match |
| 108971 | TruSeqV2    | 5:131676333 | fs        | T/T | 8.88E-16 | 220 | 99 | 41 | 99 | 0/0 | 0/0 | 0/0 | match | match | match |
| 115239 | TruSeqV2    | 5:131676333 | fs        | T/T | 6.66E-16 | 220 | 99 | 41 | 99 | 0/0 | 0/0 | 0/0 | match | match | match |
| 132306 | Agilent38MB | 5:131676333 | fs        | T/T | 1.64E-10 | 220 | 99 | 41 | 99 | 0/0 | 0/0 | 0/0 | match | match | match |
| 163383 | TruSeqV2    | 5:131676333 | fs        | T/T | 4.27E-11 | 220 | 99 | 41 | 99 | 0/0 | 0/0 | 0/0 | match | match | match |
| 198564 | Agilent38MB | 5:131676333 | fs        | T/T | 8.88E-16 | 220 | 99 | 41 | 99 | 0/0 | 0/0 | 0/0 | match | match | match |
| 115239 | TruSeqV2    | 5:131705676 | stop      | C/C | 1.52E-12 | 19  | 54 | 7  | 18 | 0/0 | 0/0 | 0/0 | match | match | match |
| 198564 | Agilent38MB | 5:131705676 | stop      | C/C | 2.24E-12 | 81  | 99 | 1  | 3  | 0/0 | 0/0 | 0/0 | match | match | match |
| 108971 | TruSeqV2    | 5:131714072 | stop      | G/G | 2.22E-16 | 77  | 99 | 34 | 93 | 0/0 | 0/0 | 0/0 | match | match | match |
| 115239 | TruSeqV2    | 5:131714072 | stop      | G/G | 1.84E-14 | 59  | 99 | 44 | 99 | 0/0 | 0/0 | 0/0 | match | match | match |
| 132306 | Agilent38MB | 5:131714072 | stop      | G/G | 2.22E-16 | 39  | 99 | 35 | 99 | 0/0 | 0/0 | 0/0 | match | match | match |
| 163383 | TruSeqV2    | 5:131714072 | stop      | G/G | 2.22E-16 | 67  | 99 | 40 | 99 | 0/0 | 0/0 | 0/0 | match | match | match |
| 198564 | Agilent38MB | 5:131714072 | stop      | G/G | 3.11E-15 | 89  | 99 | 38 | 77 | 0/0 | 0/0 | 0/0 | match | match | match |

|        |             |             |          |     |          |     |    |    |    |     |     |     |       |       |       |
|--------|-------------|-------------|----------|-----|----------|-----|----|----|----|-----|-----|-----|-------|-------|-------|
| 108971 | TruSeqV2    | 5:131719906 | missense | T/T | 1.33E-15 | 152 | 99 | 48 | 99 | 0/0 | 0/0 | 0/0 | match | match | match |
| 115239 | TruSeqV2    | 5:131719906 | missense | T/T | 2.22E-16 | 87  | 99 | 43 | 99 | 0/0 | 0/0 | 0/0 | match | match | match |
| 132306 | Agilent38MB | 5:131719906 | missense | T/T | 1.78E-15 | 226 | 99 | 33 | 75 | 0/0 | 0/0 | 0/0 | match | match | match |
| 163383 | TruSeqV2    | 5:131719906 | missense | T/T | 4.44E-16 | 136 | 99 | 30 | 84 | 0/0 | 0/0 | 0/0 | match | match | match |
| 198564 | Agilent38MB | 5:131719906 | missense | T/T | 4.44E-16 | 397 | 99 | 52 | 99 | 0/0 | 0/0 | 0/0 | match | match | match |
| 108971 | TruSeqV2    | 5:131721174 | synon    | G/G | 5.11E-15 | 68  | 99 | 16 | 48 | 1/1 | 1/1 | 1/1 | match | match | match |
| 115239 | TruSeqV2    | 5:131721174 | synon    | A/G | 6.66E-16 | 29  | 99 | 15 | 99 | 0/1 | 0/1 | 0/1 | match | match | match |
| 132306 | Agilent38MB | 5:131721174 | synon    | A/A | 1.07E-14 | 82  | 99 | 14 | 33 | 0/0 | 0/0 | 0/0 | match | match | match |
| 163383 | TruSeqV2    | 5:131721174 | synon    | A/A | 1.56E-13 | 61  | 99 | 23 | 57 | 0/0 | 0/0 | 0/0 | match | match | match |
| 198564 | Agilent38MB | 5:131721174 | synon    | A/G | 1.11E-15 | 123 | 99 | 18 | 99 | 0/1 | 0/1 | 0/1 | match | match | match |
| 108971 | TruSeqV2    | 5:131724639 | synon    | G/G | 6.66E-16 | 206 | 99 | 47 | 99 | 0/0 | 0/0 | 0/0 | match | match | match |
| 115239 | TruSeqV2    | 5:131724639 | synon    | G/G | 8.44E-15 | 176 | 99 | 33 | 93 | 0/0 | 0/0 | 0/0 | match | match | match |
| 132306 | Agilent38MB | 5:131724639 | synon    | G/G | 1.55E-15 | 93  | 99 | 37 | 99 | 0/0 | 0/0 | 0/0 | match | match | match |
| 163383 | TruSeqV2    | 5:131724639 | synon    | G/G | 4.44E-16 | 170 | 99 | 31 | 84 | 0/0 | 0/0 | 0/0 | match | match | match |
| 198564 | Agilent38MB | 5:131724639 | synon    | G/G | 1.51E-13 | 183 | 99 | 40 | 99 | 0/0 | 0/0 | 0/0 | match | match | match |
| 108971 | TruSeqV2    | 5:131726490 | stop     | T/T | 4.44E-16 | 130 | 99 | 53 | 99 | 0/0 | 0/0 | 0/0 | match | match | match |
| 115239 | TruSeqV2    | 5:131726490 | stop     | T/T | 6.66E-16 | 94  | 99 | 40 | 99 | 0/0 | 0/0 | 0/0 | match | match | match |
| 132306 | Agilent38MB | 5:131726490 | stop     | T/T | 4.44E-16 | 96  | 99 | 38 | 99 | 0/0 | 0/0 | 0/0 | match | match | match |
| 163383 | TruSeqV2    | 5:131726490 | stop     | T/T | 6.66E-16 | 116 | 99 | 40 | 99 | 0/0 | 0/0 | 0/0 | match | match | match |
| 198564 | Agilent38MB | 5:131726490 | stop     | T/T | 2.00E-15 | 196 | 99 | 46 | 99 | 0/0 | 0/0 | 0/0 | match | match | match |
| 108971 | TruSeqV2    | 5:131730011 | 3'UTR    | C/T | 9.71E-12 | 230 | 99 | 31 | 99 | 0/1 | 0/1 | 0/1 | match | match | match |
| 115239 | TruSeqV2    | 5:131730011 | 3'UTR    | C/C | 3.15E-14 | 167 | 99 | 53 | 99 | 0/0 | 0/0 | 0/0 | match | match | match |
| 132306 | Agilent38MB | 5:131730011 | 3'UTR    | C/C | 2.89E-15 | 17  | 30 | 31 | 66 | 0/0 | 0/0 | 0/0 | match | match | match |
| 163383 | TruSeqV2    | 5:131730011 | 3'UTR    | C/C | 2.49E-14 | 200 | 99 | 52 | 99 | 0/0 | 0/0 | 0/0 | match | match | match |
| 198564 | Agilent38MB | 5:131730011 | 3'UTR    | C/T | 9.57E-14 | 26  | 99 | 45 | 99 | 0/1 | 0/1 | 0/1 | match | match | match |
| 108971 | TruSeqV2    | 5:131730807 | 3'UTR    | C/C | 1.54E-12 | 118 | 99 | 47 | 99 | 1/1 | 1/1 | 1/1 | match | match | match |
| 115239 | TruSeqV2    | 5:131730807 | 3'UTR    | C/T | 6.44E-15 | 80  | 99 | 24 | 99 | 0/1 | 0/1 | 0/1 | match | match | match |
| 163383 | TruSeqV2    | 5:131730807 | 3'UTR    | C/C | 3.24E-14 | 123 | 99 | 34 | 99 | 1/1 | 1/1 | 1/1 | match | match | match |
| 108971 | TruSeqV2    | 5:142659266 | 3'UTR    | T/T | 6.66E-16 | 73  | 99 | 53 | 99 | 0/0 | 0/0 | 0/0 | match | match | match |
| 115239 | TruSeqV2    | 5:142659266 | 3'UTR    | T/T | 4.00E-15 | 65  | 99 | 50 | 99 | 0/0 | 0/0 | 0/0 | match | match | match |
| 163383 | TruSeqV2    | 5:142659266 | 3'UTR    | T/T | 4.44E-16 | 63  | 99 | 48 | 99 | 0/0 | 0/0 | 0/0 | match | match | match |
| 108971 | TruSeqV2    | 5:142659748 | 3'UTR    | C/C | 2.22E-16 | 80  | 99 | 55 | 99 | 0/0 | 0/0 | 0/0 | match | match | match |
| 115239 | TruSeqV2    | 5:142659748 | 3'UTR    | C/C | 4.44E-16 | 60  | 99 | 41 | 99 | 0/0 | 0/0 | 0/0 | match | match | match |
| 163383 | TruSeqV2    | 5:142659748 | 3'UTR    | C/C | 4.44E-16 | 95  | 99 | 49 | 99 | 0/0 | 0/0 | 0/0 | match | match | match |
| 198564 | Agilent38MB | 5:142659748 | 3'UTR    | C/C | 4.88E-15 | 1   | 3  | 46 | 99 | 0/0 | 0/0 | 0/0 | match | match | match |
| 108971 | TruSeqV2    | 5:142660229 | 3'UTR    | A/A | 4.44E-16 | 58  | 99 | 41 | 99 | 0/0 | 0/0 | 0/0 | match | match | match |
| 115239 | TruSeqV2    | 5:142660229 | 3'UTR    | A/A | 4.44E-16 | 49  | 99 | 35 | 87 | 0/0 | 0/0 | 0/0 | match | match | match |
| 163383 | TruSeqV2    | 5:142660229 | 3'UTR    | A/A | 4.44E-16 | 47  | 99 | 34 | 90 | 0/0 | 0/0 | 0/0 | match | match | match |

|        |             |             |          |     |          |     |    |    |    |     |     |     |       |       |       |
|--------|-------------|-------------|----------|-----|----------|-----|----|----|----|-----|-----|-----|-------|-------|-------|
| 108971 | TruSeqV2    | 5:142661490 | synon    | A/A | 8.88E-16 | 26  | 60 | 36 | 99 | 0/0 | 0/0 | 0/0 | match | match | match |
| 115239 | TruSeqV2    | 5:142661490 | synon    | A/A | 4.44E-16 | 12  | 24 | 60 | 99 | 0/0 | 0/0 | 0/0 | match | match | match |
| 132306 | Agilent38MB | 5:142661490 | synon    | G/A | 4.44E-15 | 50  | 99 | 36 | 99 | 0/1 | 0/1 | 0/1 | match | match | match |
| 163383 | TruSeqV2    | 5:142661490 | synon    | A/A | 8.88E-16 | 20  | 45 | 42 | 90 | 0/0 | 0/0 | 0/0 | match | match | match |
| 198564 | Agilent38MB | 5:142661490 | synon    | A/A | 2.22E-15 | 97  | 99 | 51 | 99 | 0/0 | 0/0 | 0/0 | match | match | match |
| 108971 | TruSeqV2    | 5:142662280 | synon    | G/G | 4.44E-16 | 80  | 99 | 49 | 99 | 0/0 | 0/0 | 0/0 | match | match | match |
| 115239 | TruSeqV2    | 5:142662280 | synon    | G/G | 1.78E-15 | 68  | 99 | 42 | 99 | 0/0 | 0/0 | 0/0 | match | match | match |
| 132306 | Agilent38MB | 5:142662280 | synon    | G/G | 1.11E-15 | 197 | 99 | 34 | 81 | 0/0 | 0/0 | 0/0 | match | match | match |
| 163383 | TruSeqV2    | 5:142662280 | synon    | G/G | 6.66E-16 | 53  | 99 | 44 | 99 | 0/0 | 0/0 | 0/0 | match | match | match |
| 198564 | Agilent38MB | 5:142662280 | synon    | G/G | 2.22E-16 | 329 | 99 | 35 | 99 | 0/0 | 0/0 | 0/0 | match | match | match |
| 108971 | TruSeqV2    | 5:142678361 | synon    | G/G | 5.77E-15 | 57  | 99 | 35 | 90 | 0/0 | 0/0 | 0/0 | match | match | match |
| 115239 | TruSeqV2    | 5:142678361 | synon    | G/G | 6.66E-16 | 34  | 65 | 36 | 93 | 0/0 | 0/0 | 0/0 | match | match | match |
| 132306 | Agilent38MB | 5:142678361 | synon    | G/G | 2.22E-16 | 68  | 99 | 30 | 75 | 0/0 | 0/0 | 0/0 | match | match | match |
| 163383 | TruSeqV2    | 5:142678361 | synon    | G/G | 4.44E-16 | 39  | 87 | 41 | 96 | 0/0 | 0/0 | 0/0 | match | match | match |
| 198564 | Agilent38MB | 5:142678361 | synon    | G/G | 3.55E-14 | 107 | 99 | 35 | 99 | 0/0 | 0/0 | 0/0 | match | match | match |
| 108971 | TruSeqV2    | 5:142680246 | missense | G/G | 6.66E-16 | 145 | 99 | 46 | 99 | 0/0 | 0/0 | 0/0 | match | match | match |
| 115239 | TruSeqV2    | 5:142680246 | missense | G/G | 8.88E-16 | 116 | 99 | 43 | 99 | 0/0 | 0/0 | 0/0 | match | match | match |
| 132306 | Agilent38MB | 5:142680246 | missense | G/G | 1.33E-15 | 173 | 99 | 40 | 99 | 0/0 | 0/0 | 0/0 | match | match | match |
| 163383 | TruSeqV2    | 5:142680246 | missense | G/G | 8.88E-16 | 129 | 99 | 43 | 99 | 0/0 | 0/0 | 0/0 | match | match | match |
| 198564 | Agilent38MB | 5:142680246 | missense | G/G | 2.00E-15 | 332 | 99 | 47 | 99 | 0/0 | 0/0 | 0/0 | match | match | match |
| 108971 | TruSeqV2    | 5:142779317 | missense | T/T | 5.28E-14 | 62  | 99 | 49 | 99 | 0/0 | 0/0 | 0/0 | match | match | match |
| 115239 | TruSeqV2    | 5:142779317 | missense | T/T | 2.84E-14 | 56  | 99 | 46 | 99 | 0/0 | 0/0 | 0/0 | match | match | match |
| 132306 | Agilent38MB | 5:142779317 | missense | T/T | 6.66E-16 | 200 | 99 | 42 | 99 | 0/0 | 0/0 | 0/0 | match | match | match |
| 163383 | TruSeqV2    | 5:142779317 | missense | T/T | 6.66E-16 | 57  | 99 | 47 | 99 | 0/0 | 0/0 | 0/0 | match | match | match |
| 198564 | Agilent38MB | 5:142779317 | missense | T/T | 8.88E-16 | 361 | 99 | 41 | 96 | 0/0 | 0/0 | 0/0 | match | match | match |
| 108971 | TruSeqV2    | 5:142779601 | synon    | G/G | 4.44E-16 | 40  | 99 | 32 | 84 | 0/0 | 0/0 | 0/0 | match | match | match |
| 115239 | TruSeqV2    | 5:142779601 | synon    | G/G | 2.22E-16 | 21  | 54 | 35 | 99 | 0/0 | 0/0 | 0/0 | match | match | match |
| 132306 | Agilent38MB | 5:142779601 | synon    | G/G | 2.22E-16 | 294 | 99 | 33 | 96 | 0/0 | 0/0 | 0/0 | match | match | match |
| 163383 | TruSeqV2    | 5:142779601 | synon    | G/G | 2.22E-16 | 51  | 99 | 36 | 96 | 0/0 | 0/0 | 0/0 | match | match | match |
| 198564 | Agilent38MB | 5:142779601 | synon    | G/G | 2.44E-15 | 606 | 99 | 49 | 99 | 0/0 | 0/0 | 0/0 | match | match | match |
| 108971 | TruSeqV2    | 5:142780212 | missense | A/A | 8.88E-16 | 176 | 99 | 40 | 96 | 0/0 | 0/0 | 0/0 | match | match | match |
| 115239 | TruSeqV2    | 5:142780212 | missense | A/A | 4.44E-15 | 102 | 99 | 27 | 60 | 0/0 | 0/0 | 0/0 | match | match | match |
| 132306 | Agilent38MB | 5:142780212 | missense | A/A | 1.33E-15 | 12  | 27 | 38 | 99 | 0/0 | 0/0 | 0/0 | match | match | match |
| 163383 | TruSeqV2    | 5:142780212 | missense | A/A | 2.89E-15 | 117 | 99 | 51 | 99 | 0/0 | 0/0 | 0/0 | match | match | match |
| 198564 | Agilent38MB | 5:142780212 | missense | A/A | 1.11E-13 | 50  | 99 | 28 | 75 | 0/0 | 0/0 | 0/0 | match | match | match |
| 108971 | TruSeqV2    | 5:142780337 | missense | C/C | 9.33E-15 | 198 | 99 | 33 | 90 | 0/0 | 0/0 | 0/0 | match | match | match |
| 115239 | TruSeqV2    | 5:142780337 | missense | T/C | 9.35E-14 | 145 | 99 | 42 | 99 | 0/1 | 0/1 | 0/1 | match | match | match |
| 132306 | Agilent38MB | 5:142780337 | missense | C/C | 1.78E-15 | 77  | 99 | 38 | 99 | 0/0 | 0/0 | 0/0 | match | match | match |

|        |             |             |          |     |          |     |    |    |    |     |     |     |       |       |       |
|--------|-------------|-------------|----------|-----|----------|-----|----|----|----|-----|-----|-----|-------|-------|-------|
| 163383 | TruSeqV2    | 5:142780337 | missense | C/C | 1.11E-15 | 180 | 99 | 38 | 99 | 0/0 | 0/0 | 0/0 | match | match | match |
| 198564 | Agilent38MB | 5:142780337 | missense | C/C | 2.22E-16 | 140 | 99 | 28 | 75 | 0/0 | 0/0 | 0/0 | match | match | match |
| 108971 | TruSeqV2    | 5:142780339 | synon    | C/C | 2.22E-16 | 198 | 99 | 33 | 84 | 0/0 | 0/0 | 0/0 | match | match | match |
| 115239 | TruSeqV2    | 5:142780339 | synon    | T/C | 1.87E-14 | 148 | 99 | 42 | 99 | 0/1 | 0/1 | 0/1 | match | match | match |
| 132306 | Agilent38MB | 5:142780339 | synon    | C/C | 1.60E-14 | 75  | 99 | 39 | 99 | 0/0 | 0/0 | 0/0 | match | match | match |
| 163383 | TruSeqV2    | 5:142780339 | synon    | C/C | 8.88E-16 | 181 | 99 | 37 | 99 | 0/0 | 0/0 | 0/0 | match | match | match |
| 198564 | Agilent38MB | 5:142780339 | synon    | C/C | 4.44E-16 | 142 | 99 | 29 | 84 | 0/0 | 0/0 | 0/0 | match | match | match |
| 108971 | TruSeqV2    | 5:74633081  | 5'UTR    | T/T | 2.52E-09 | 58  | 99 | 29 | 63 | 0/0 | 0/0 | 0/0 | match | match | match |
| 115239 | TruSeqV2    | 5:74633081  | 5'UTR    | T/T | 7.77E-15 | 34  | 99 | 7  | 18 | 0/0 | 0/0 | 0/0 | match | match | match |
| 132306 | Agilent38MB | 5:74633081  | 5'UTR    | T/T | 6.00E-15 | 1   | 3  | 14 | 33 | 0/0 | 0/0 | 0/0 | match | match | match |
| 163383 | TruSeqV2    | 5:74633081  | 5'UTR    | T/T | 1.60E-14 | 46  | 99 | 12 | 30 | 0/0 | 0/0 | 0/0 | match | match | match |
| 198564 | Agilent38MB | 5:74633081  | 5'UTR    | T/T | 7.53E-14 | 1   | 3  | 45 | 99 | 0/0 | 0/0 | 0/0 | match | match | match |
| 108971 | TruSeqV2    | 5:74633716  | intronic | G/G | 4.44E-16 | 1   | 3  | 37 | 99 | 0/0 | 0/0 | 0/0 | match | match | match |
| 108971 | TruSeqV2    | 5:74652199  | missense | A/A | 4.44E-16 | 109 | 99 | 42 | 93 | 0/0 | 0/0 | 0/0 | match | match | match |
| 115239 | TruSeqV2    | 5:74652199  | missense | A/A | 4.44E-16 | 76  | 99 | 45 | 99 | 0/0 | 0/0 | 0/0 | match | match | match |
| 132306 | Agilent38MB | 5:74652199  | missense | A/A | 2.22E-16 | 66  | 99 | 43 | 99 | 0/0 | 0/0 | 0/0 | match | match | match |
| 163383 | TruSeqV2    | 5:74652199  | missense | A/A | 6.66E-16 | 91  | 99 | 43 | 99 | 0/0 | 0/0 | 0/0 | match | match | match |
| 198564 | Agilent38MB | 5:74652199  | missense | A/A | 5.55E-15 | 123 | 99 | 49 | 99 | 0/0 | 0/0 | 0/0 | match | match | match |
| 108971 | TruSeqV2    | 5:74656175  | 3'UTR    | G/G | 2.22E-16 | 103 | 99 | 43 | 99 | 0/0 | 0/0 | 0/0 | match | match | match |
| 115239 | TruSeqV2    | 5:74656175  | 3'UTR    | G/G | 2.22E-16 | 66  | 99 | 48 | 99 | 0/0 | 0/0 | 0/0 | match | match | match |
| 132306 | Agilent38MB | 5:74656175  | 3'UTR    | G/G | 2.22E-16 | 42  | 99 | 40 | 96 | 0/0 | 0/0 | 0/0 | match | match | match |
| 163383 | TruSeqV2    | 5:74656175  | 3'UTR    | G/G | 2.22E-16 | 81  | 99 | 42 | 99 | 0/0 | 0/0 | 0/0 | match | match | match |
| 198564 | Agilent38MB | 5:74656175  | 3'UTR    | G/G | 2.22E-16 | 106 | 99 | 39 | 99 | 0/0 | 0/0 | 0/0 | match | match | match |
| 108971 | TruSeqV2    | 5:74656274  | 3'UTR    | G/G | 2.22E-16 | 90  | 99 | 53 | 99 | 0/0 | 0/0 | 0/0 | match | match | match |
| 115239 | TruSeqV2    | 5:74656274  | 3'UTR    | G/G | 4.44E-16 | 54  | 99 | 44 | 99 | 0/0 | 0/0 | 0/0 | match | match | match |
| 132306 | Agilent38MB | 5:74656274  | 3'UTR    | G/G | 2.22E-16 | 4   | 9  | 37 | 99 | 0/0 | 0/0 | 0/0 | match | match | match |
| 163383 | TruSeqV2    | 5:74656274  | 3'UTR    | G/G | 2.22E-16 | 76  | 99 | 42 | 99 | 0/0 | 0/0 | 0/0 | match | match | match |
| 198564 | Agilent38MB | 5:74656274  | 3'UTR    | G/G | 7.99E-15 | 4   | 6  | 38 | 99 | 0/0 | 0/0 | 0/0 | match | match | match |
| 108971 | TruSeqV2    | 6:111368336 | missense | G/G | 6.11E-12 | 361 | 99 | 42 | 99 | 0/0 | 0/0 | 0/0 | match | match | match |
| 115239 | TruSeqV2    | 6:111368336 | missense | G/G | 1.51E-11 | 247 | 99 | 38 | 99 | 0/0 | 0/0 | 0/0 | match | match | match |
| 132306 | Agilent38MB | 6:111368336 | missense | G/G | 9.99E-13 | 24  | 57 | 34 | 90 | 0/0 | 0/0 | 0/0 | match | match | match |
| 163383 | TruSeqV2    | 6:111368336 | missense | G/G | 4.79E-13 | 292 | 99 | 30 | 75 | 0/0 | 0/0 | 0/0 | match | match | match |
| 198564 | Agilent38MB | 6:111368336 | missense | G/G | 7.52E-12 | 63  | 99 | 34 | 93 | 0/0 | 0/0 | 0/0 | match | match | match |
| 108971 | TruSeqV2    | 6:160543008 | missense | C/C | 4.44E-16 | 138 | 99 | 32 | 90 | 0/0 | 0/0 | 0/0 | match | match | match |
| 115239 | TruSeqV2    | 6:160543008 | missense | C/C | 2.22E-16 | 85  | 99 | 25 | 72 | 0/0 | 0/0 | 0/0 | match | match | match |
| 132306 | Agilent38MB | 6:160543008 | missense | C/C | 8.88E-16 | 135 | 99 | 29 | 78 | 0/0 | 0/0 | 0/0 | match | match | match |
| 163383 | TruSeqV2    | 6:160543008 | missense | C/C | 2.22E-16 | 82  | 99 | 39 | 99 | 0/0 | 0/0 | 0/0 | match | match | match |
| 198564 | Agilent38MB | 6:160543008 | missense | C/C | 2.22E-16 | 254 | 99 | 47 | 99 | 0/0 | 0/0 | 0/0 | match | match | match |

|        |             |             |          |     |          |     |    |    |    |     |     |     |       |       |       |
|--------|-------------|-------------|----------|-----|----------|-----|----|----|----|-----|-----|-----|-------|-------|-------|
| 108971 | TruSeqV2    | 6:160543021 | fs       | -/- | 2.22E-16 | 129 | 99 | 35 | 99 | 0/0 | 0/0 | 0/0 | match | match | match |
| 115239 | TruSeqV2    | 6:160543021 | fs       | -/- | 2.22E-16 | 129 | 99 | 35 | 99 | 0/0 | 0/0 | 0/0 | match | match | match |
| 132306 | Agilent38MB | 6:160543021 | fs       | -/- | 2.22E-16 | 129 | 99 | 35 | 99 | 0/0 | 0/0 | 0/0 | match | match | match |
| 163383 | TruSeqV2    | 6:160543021 | fs       | -/- | 2.22E-16 | 129 | 99 | 35 | 99 | 0/0 | 0/0 | 0/0 | match | match | match |
| 198564 | Agilent38MB | 6:160543021 | fs       | -/- | 4.44E-16 | 129 | 99 | 35 | 99 | 0/0 | 0/0 | 0/0 | match | match | match |
| 108971 | TruSeqV2    | 6:160543034 | missense | C/C | 2.22E-16 | 131 | 99 | 38 | 99 | 0/0 | 0/0 | 0/0 | match | match | match |
| 115239 | TruSeqV2    | 6:160543034 | missense | C/C | 4.44E-16 | 79  | 99 | 27 | 66 | 0/0 | 0/0 | 0/0 | match | match | match |
| 132306 | Agilent38MB | 6:160543034 | missense | C/C | 4.44E-16 | 100 | 99 | 35 | 99 | 0/0 | 0/0 | 0/0 | match | match | match |
| 163383 | TruSeqV2    | 6:160543034 | missense | C/C | 2.22E-16 | 79  | 99 | 37 | 99 | 0/0 | 0/0 | 0/0 | match | match | match |
| 198564 | Agilent38MB | 6:160543034 | missense | C/C | 2.22E-16 | 181 | 99 | 60 | 99 | 0/0 | 0/0 | 0/0 | match | match | match |
| 108971 | TruSeqV2    | 6:160543080 | missense | G/G | 2.66E-15 | 95  | 99 | 41 | 78 | 0/0 | 0/0 | 0/0 | match | match | match |
| 115239 | TruSeqV2    | 6:160543080 | missense | G/G | 2.22E-16 | 80  | 99 | 15 | 39 | 0/0 | 0/0 | 0/0 | match | match | match |
| 132306 | Agilent38MB | 6:160543080 | missense | G/G | 3.55E-15 | 64  | 99 | 45 | 65 | 0/0 | 0/0 | 0/0 | match | match | match |
| 163383 | TruSeqV2    | 6:160543080 | missense | G/G | 5.55E-15 | 73  | 99 | 32 | 95 | 0/0 | 0/0 | 0/0 | match | match | match |
| 198564 | Agilent38MB | 6:160543080 | missense | G/G | 4.44E-16 | 85  | 99 | 50 | 99 | 0/0 | 0/0 | 0/0 | match | match | match |
| 108971 | TruSeqV2    | 6:160543123 | synon    | T/T | 4.44E-16 | 115 | 99 | 46 | 99 | 0/0 | 0/0 | 0/0 | match | match | match |
| 115239 | TruSeqV2    | 6:160543123 | synon    | C/T | 2.00E-15 | 77  | 99 | 15 | 99 | 0/1 | 0/1 | 0/1 | match | match | match |
| 132306 | Agilent38MB | 6:160543123 | synon    | T/T | 1.11E-15 | 42  | 90 | 51 | 99 | 0/0 | 0/0 | 0/0 | match | match | match |
| 163383 | TruSeqV2    | 6:160543123 | synon    | T/T | 4.44E-16 | 73  | 99 | 46 | 99 | 0/0 | 0/0 | 0/0 | match | match | match |
| 198564 | Agilent38MB | 6:160543123 | synon    | T/T | 6.66E-16 | 47  | 99 | 53 | 99 | 0/0 | 0/0 | 0/0 | match | match | match |
| 108971 | TruSeqV2    | 6:160543148 | missense | C/C | 2.22E-16 | 114 | 99 | 44 | 99 | 0/0 | 0/0 | 0/0 | match | match | match |
| 115239 | TruSeqV2    | 6:160543148 | missense | C/C | 2.22E-16 | 76  | 99 | 21 | 54 | 0/0 | 0/0 | 0/0 | match | match | match |
| 132306 | Agilent38MB | 6:160543148 | missense | C/C | 2.22E-16 | 28  | 54 | 49 | 99 | 0/0 | 0/0 | 0/0 | match | match | match |
| 163383 | TruSeqV2    | 6:160543148 | missense | C/C | 4.44E-16 | 76  | 99 | 44 | 99 | 0/0 | 0/0 | 0/0 | match | match | match |
| 198564 | Agilent38MB | 6:160543148 | missense | T/T | 1.47E-11 | 48  | 99 | 55 | 99 | 1/1 | 1/1 | 1/1 | match | match | match |
| 108971 | TruSeqV2    | 6:160543220 | missense | C/C | 2.89E-15 | 131 | 99 | 46 | 97 | 0/0 | 0/0 | 0/0 | match | match | match |
| 115239 | TruSeqV2    | 6:160543220 | missense | C/C | 4.44E-16 | 89  | 99 | 24 | 47 | 0/0 | 0/0 | 0/0 | match | match | match |
| 132306 | Agilent38MB | 6:160543220 | missense | C/C | 1.11E-15 | 31  | 55 | 28 | 75 | 0/0 | 0/0 | 0/0 | match | match | match |
| 163383 | TruSeqV2    | 6:160543220 | missense | C/C | 1.55E-15 | 100 | 99 | 38 | 96 | 0/0 | 0/0 | 0/0 | match | match | match |
| 198564 | Agilent38MB | 6:160543220 | missense | C/C | 1.55E-15 | 48  | 99 | 50 | 99 | 0/0 | 0/0 | 0/0 | match | match | match |
| 108971 | TruSeqV2    | 6:160543229 | missense | T/T | 2.22E-16 | 132 | 99 | 45 | 99 | 0/0 | 0/0 | 0/0 | match | match | match |
| 115239 | TruSeqV2    | 6:160543229 | missense | T/T | 2.22E-16 | 91  | 99 | 22 | 60 | 0/0 | 0/0 | 0/0 | match | match | match |
| 132306 | Agilent38MB | 6:160543229 | missense | T/T | 2.22E-16 | 29  | 72 | 27 | 75 | 0/0 | 0/0 | 0/0 | match | match | match |
| 163383 | TruSeqV2    | 6:160543229 | missense | T/T | 2.22E-16 | 105 | 99 | 40 | 99 | 0/0 | 0/0 | 0/0 | match | match | match |
| 198564 | Agilent38MB | 6:160543229 | missense | T/T | 2.22E-16 | 55  | 99 | 50 | 99 | 0/0 | 0/0 | 0/0 | match | match | match |
| 108971 | TruSeqV2    | 6:160551204 | missense | C/C | 1.33E-14 | 102 | 99 | 47 | 99 | 1/1 | 1/1 | 1/1 | match | match | match |
| 115239 | TruSeqV2    | 6:160551204 | missense | C/C | 1.60E-14 | 60  | 99 | 35 | 99 | 1/1 | 1/1 | 1/1 | match | match | match |
| 132306 | Agilent38MB | 6:160551204 | missense | C/G | 1.69E-14 | 297 | 99 | 44 | 99 | 0/1 | 0/1 | 0/1 | match | match | match |

|        |             |             |          |     |          |     |    |    |    |     |     |     |       |       |       |
|--------|-------------|-------------|----------|-----|----------|-----|----|----|----|-----|-----|-----|-------|-------|-------|
| 163383 | TruSeqV2    | 6:160551204 | missense | C/C | 7.11E-15 | 85  | 99 | 32 | 96 | 1/1 | 1/1 | 1/1 | match | match | match |
| 198564 | Agilent38MB | 6:160551204 | missense | G/G | 4.13E-14 | 618 | 99 | 34 | 87 | 0/0 | 0/0 | 0/0 | match | match | match |
| 115239 | TruSeqV2    | 6:160553314 | missense | C/C | 1.33E-15 | 135 | 99 | 30 | 78 | 0/0 | 0/0 | 0/0 | match | match | match |
| 132306 | Agilent38MB | 6:160553314 | missense | C/C | 1.55E-15 | 344 | 99 | 21 | 54 | 0/0 | 0/0 | 0/0 | match | match | match |
| 163383 | TruSeqV2    | 6:160553314 | missense | C/C | 2.00E-15 | 154 | 99 | 38 | 99 | 0/0 | 0/0 | 0/0 | match | match | match |
| 198564 | Agilent38MB | 6:160553314 | missense | C/C | 1.11E-15 | 819 | 99 | 42 | 99 | 0/0 | 0/0 | 0/0 | match | match | match |
| 108971 | TruSeqV2    | 6:160553407 | missense | G/G | 4.44E-16 | 148 | 99 | 34 | 85 | 0/0 | 0/0 | 0/0 | match | match | match |
| 115239 | TruSeqV2    | 6:160553407 | missense | G/G | 2.22E-16 | 83  | 99 | 26 | 61 | 0/0 | 0/0 | 0/0 | match | match | match |
| 132306 | Agilent38MB | 6:160553407 | missense | G/G | 2.22E-16 | 45  | 96 | 24 | 63 | 0/0 | 0/0 | 0/0 | match | match | match |
| 163383 | TruSeqV2    | 6:160553407 | missense | G/G | 2.22E-16 | 95  | 99 | 25 | 69 | 0/0 | 0/0 | 0/0 | match | match | match |
| 198564 | Agilent38MB | 6:160553407 | missense | G/G | 1.11E-15 | 96  | 99 | 27 | 66 | 0/0 | 0/0 | 0/0 | match | match | match |
| 108971 | TruSeqV2    | 6:160557260 | missense | C/C | 2.22E-16 | 268 | 99 | 38 | 99 | 0/0 | 0/0 | 0/0 | match | match | match |
| 115239 | TruSeqV2    | 6:160557260 | missense | C/C | 6.66E-16 | 148 | 99 | 31 | 75 | 0/0 | 0/0 | 0/0 | match | match | match |
| 132306 | Agilent38MB | 6:160557260 | missense | C/C | 4.44E-16 | 113 | 99 | 33 | 90 | 0/0 | 0/0 | 0/0 | match | match | match |
| 163383 | TruSeqV2    | 6:160557260 | missense | C/C | 8.88E-16 | 188 | 99 | 35 | 90 | 0/0 | 0/0 | 0/0 | match | match | match |
| 198564 | Agilent38MB | 6:160557260 | missense | C/C | 1.11E-15 | 199 | 99 | 44 | 99 | 0/0 | 0/0 | 0/0 | match | match | match |
| 108971 | TruSeqV2    | 6:160557271 | missense | C/C | 2.22E-16 | 274 | 99 | 40 | 99 | 0/0 | 0/0 | 0/0 | match | match | match |
| 115239 | TruSeqV2    | 6:160557271 | missense | C/C | 4.44E-16 | 143 | 99 | 31 | 78 | 0/0 | 0/0 | 0/0 | match | match | match |
| 132306 | Agilent38MB | 6:160557271 | missense | C/C | 2.22E-16 | 130 | 99 | 35 | 93 | 0/0 | 0/0 | 0/0 | match | match | match |
| 163383 | TruSeqV2    | 6:160557271 | missense | C/C | 2.22E-16 | 210 | 99 | 39 | 99 | 0/0 | 0/0 | 0/0 | match | match | match |
| 198564 | Agilent38MB | 6:160557271 | missense | C/C | 2.22E-16 | 214 | 99 | 47 | 99 | 0/0 | 0/0 | 0/0 | match | match | match |
| 108971 | TruSeqV2    | 6:160557643 | missense | C/C | 2.22E-16 | 230 | 99 | 35 | 99 | 0/0 | 0/0 | 0/0 | match | match | match |
| 115239 | TruSeqV2    | 6:160557643 | missense | C/C | 2.22E-16 | 160 | 99 | 32 | 81 | 0/0 | 0/0 | 0/0 | match | match | match |
| 132306 | Agilent38MB | 6:160557643 | missense | C/C | 2.22E-16 | 304 | 99 | 40 | 99 | 0/0 | 0/0 | 0/0 | match | match | match |
| 163383 | TruSeqV2    | 6:160557643 | missense | C/C | 2.22E-16 | 152 | 99 | 52 | 99 | 0/0 | 0/0 | 0/0 | match | match | match |
| 198564 | Agilent38MB | 6:160557643 | missense | C/C | 2.22E-16 | 544 | 99 | 29 | 81 | 0/0 | 0/0 | 0/0 | match | match | match |
| 108971 | TruSeqV2    | 6:160560824 | missense | G/G | 1.33E-15 | 107 | 99 | 33 | 96 | 0/0 | 0/0 | 0/0 | match | match | match |
| 115239 | TruSeqV2    | 6:160560824 | missense | G/G | 2.22E-16 | 63  | 99 | 23 | 57 | 0/0 | 0/0 | 0/0 | match | match | match |
| 132306 | Agilent38MB | 6:160560824 | missense | G/G | 6.66E-16 | 70  | 99 | 25 | 60 | 0/0 | 0/0 | 0/0 | match | match | match |
| 163383 | TruSeqV2    | 6:160560824 | missense | G/G | 2.22E-16 | 95  | 99 | 38 | 99 | 0/0 | 0/0 | 0/0 | match | match | match |
| 198564 | Agilent38MB | 6:160560824 | missense | G/G | 2.22E-16 | 148 | 99 | 28 | 78 | 0/0 | 0/0 | 0/0 | match | match | match |
| 108971 | TruSeqV2    | 6:160560832 | missense | C/C | 2.00E-15 | 109 | 99 | 34 | 81 | 0/0 | 0/0 | 0/0 | match | match | match |
| 115239 | TruSeqV2    | 6:160560832 | missense | C/C | 1.33E-15 | 65  | 99 | 20 | 39 | 0/0 | 0/0 | 0/0 | match | match | match |
| 132306 | Agilent38MB | 6:160560832 | missense | C/C | 4.44E-16 | 74  | 99 | 21 | 54 | 0/0 | 0/0 | 0/0 | match | match | match |
| 163383 | TruSeqV2    | 6:160560832 | missense | C/C | 4.44E-16 | 93  | 99 | 37 | 99 | 0/0 | 0/0 | 0/0 | match | match | match |
| 198564 | Agilent38MB | 6:160560832 | missense | C/C | 8.88E-16 | 162 | 99 | 28 | 69 | 0/0 | 0/0 | 0/0 | match | match | match |
| 108971 | TruSeqV2    | 6:160560845 | missense | A/G | 1.13E-14 | 93  | 99 | 30 | 99 | 0/1 | 0/1 | 0/1 | match | match | match |
| 115239 | TruSeqV2    | 6:160560845 | missense | A/G | 8.88E-16 | 55  | 99 | 13 | 99 | 0/1 | 0/1 | 0/1 | match | match | match |



|        |             |             |          |         |          |     |    |    |    |     |     |     |       |       |       |
|--------|-------------|-------------|----------|---------|----------|-----|----|----|----|-----|-----|-----|-------|-------|-------|
| 132306 | Agilent38MB | 6:160560845 | missense | A/G     | 1.24E-14 | 73  | 99 | 19 | 99 | 0/1 | 0/1 | 0/1 | match | match | match |
| 163383 | TruSeqV2    | 6:160560845 | missense | A/G     | 2.89E-15 | 88  | 99 | 34 | 99 | 0/1 | 0/1 | 0/1 | match | match | match |
| 198564 | Agilent38MB | 6:160560845 | missense | A/A     | 2.80E-14 | 166 | 99 | 24 | 66 | 0/0 | 0/0 | 0/0 | match | match | match |
| 108971 | TruSeqV2    | 6:160560883 | missense | GAT/GAT | 4.44E-16 | 71  | 99 | 36 | 81 | 0/0 | 0/0 | 0/0 | match | match | match |
| 132306 | Agilent38MB | 6:160560883 | missense | GAT/GAT | 2.22E-16 | 71  | 99 | 36 | 81 | 0/0 | 0/0 | 0/0 | match | match | match |
| 163383 | TruSeqV2    | 6:160560883 | missense | GAT/GAT | 1.11E-15 | 71  | 99 | 36 | 81 | 0/0 | 0/0 | 0/0 | match | match | match |
| 198564 | Agilent38MB | 6:160560883 | missense | GAT/GAT | 5.77E-15 | 71  | 99 | 36 | 81 | 0/0 | 0/0 | 0/0 | match | match | match |
| 108971 | TruSeqV2    | 6:160564616 | missense | G/G     | 1.11E-15 | 198 | 99 | 34 | 90 | 0/0 | 0/0 | 0/0 | match | match | match |
| 115239 | TruSeqV2    | 6:160564616 | missense | G/G     | 6.66E-16 | 116 | 99 | 34 | 96 | 0/0 | 0/0 | 0/0 | match | match | match |
| 132306 | Agilent38MB | 6:160564616 | missense | G/G     | 1.55E-15 | 267 | 99 | 37 | 99 | 0/0 | 0/0 | 0/0 | match | match | match |
| 163383 | TruSeqV2    | 6:160564616 | missense | G/G     | 8.88E-16 | 179 | 99 | 25 | 63 | 0/0 | 0/0 | 0/0 | match | match | match |
| 198564 | Agilent38MB | 6:160564616 | missense | G/G     | 1.11E-15 | 494 | 99 | 41 | 99 | 0/0 | 0/0 | 0/0 | match | match | match |
| 108971 | TruSeqV2    | 6:160564677 | missense | G/G     | 2.22E-16 | 168 | 99 | 34 | 93 | 0/0 | 0/0 | 0/0 | match | match | match |
| 115239 | TruSeqV2    | 6:160564677 | missense | G/G     | 2.22E-16 | 87  | 99 | 36 | 68 | 0/0 | 0/0 | 0/0 | match | match | match |
| 132306 | Agilent38MB | 6:160564677 | missense | G/G     | 4.44E-16 | 153 | 99 | 34 | 87 | 0/0 | 0/0 | 0/0 | match | match | match |
| 163383 | TruSeqV2    | 6:160564677 | missense | G/G     | 2.22E-16 | 144 | 99 | 24 | 63 | 0/0 | 0/0 | 0/0 | match | match | match |
| 198564 | Agilent38MB | 6:160564677 | missense | G/G     | 8.88E-16 | 327 | 99 | 27 | 72 | 0/0 | 0/0 | 0/0 | match | match | match |
| 108971 | TruSeqV2    | 6:160575837 | missense | G/G     | 2.22E-16 | 152 | 99 | 42 | 99 | 0/0 | 0/0 | 0/0 | match | match | match |
| 115239 | TruSeqV2    | 6:160575837 | missense | G/G     | 2.22E-16 | 90  | 99 | 56 | 99 | 0/0 | 0/0 | 0/0 | match | match | match |
| 132306 | Agilent38MB | 6:160575837 | missense | G/G     | 2.22E-16 | 74  | 99 | 37 | 91 | 0/0 | 0/0 | 0/0 | match | match | match |
| 163383 | TruSeqV2    | 6:160575837 | missense | G/G     | 6.66E-16 | 127 | 99 | 37 | 99 | 0/0 | 0/0 | 0/0 | match | match | match |
| 198564 | Agilent38MB | 6:160575837 | missense | G/G     | 1.11E-15 | 161 | 99 | 49 | 99 | 0/0 | 0/0 | 0/0 | match | match | match |
| 108971 | TruSeqV2    | 6:160575907 | missense | G/G     | 4.44E-16 | 217 | 99 | 40 | 99 | 0/0 | 0/0 | 0/0 | match | match | match |
| 115239 | TruSeqV2    | 6:160575907 | missense | G/G     | 2.22E-16 | 151 | 99 | 53 | 99 | 0/0 | 0/0 | 0/0 | match | match | match |
| 132306 | Agilent38MB | 6:160575907 | missense | G/G     | 4.22E-15 | 120 | 99 | 33 | 90 | 0/0 | 0/0 | 0/0 | match | match | match |
| 163383 | TruSeqV2    | 6:160575907 | missense | G/G     | 4.44E-16 | 167 | 99 | 31 | 72 | 0/0 | 0/0 | 0/0 | match | match | match |
| 198564 | Agilent38MB | 6:160575907 | missense | G/G     | 2.00E-15 | 157 | 99 | 50 | 99 | 0/0 | 0/0 | 0/0 | match | match | match |
| 108971 | TruSeqV2    | 6:160579596 | synon    | A/A     | 6.66E-16 | 79  | 99 | 50 | 99 | 0/0 | 0/0 | 0/0 | match | match | match |
| 115239 | TruSeqV2    | 6:160579596 | synon    | A/A     | 1.11E-15 | 58  | 99 | 37 | 99 | 0/0 | 0/0 | 0/0 | match | match | match |
| 132306 | Agilent38MB | 6:160579596 | synon    | A/A     | 4.44E-16 | 188 | 99 | 37 | 99 | 0/0 | 0/0 | 0/0 | match | match | match |
| 163383 | TruSeqV2    | 6:160579596 | synon    | A/A     | 1.55E-15 | 83  | 99 | 41 | 99 | 0/0 | 0/0 | 0/0 | match | match | match |
| 198564 | Agilent38MB | 6:160579596 | synon    | A/A     | 2.22E-16 | 279 | 99 | 52 | 99 | 0/0 | 0/0 | 0/0 | match | match | match |
| 108971 | TruSeqV2    | 6:160579629 | 3'UTR    | G/G     | 4.44E-16 | 105 | 99 | 44 | 99 | 0/0 | 0/0 | 0/0 | match | match | match |
| 115239 | TruSeqV2    | 6:160579629 | 3'UTR    | G/G     | 2.22E-16 | 64  | 99 | 43 | 99 | 0/0 | 0/0 | 0/0 | match | match | match |
| 132306 | Agilent38MB | 6:160579629 | 3'UTR    | G/G     | 4.44E-16 | 140 | 99 | 36 | 93 | 0/0 | 0/0 | 0/0 | match | match | match |
| 163383 | TruSeqV2    | 6:160579629 | 3'UTR    | G/G     | 4.44E-16 | 98  | 99 | 47 | 99 | 0/0 | 0/0 | 0/0 | match | match | match |
| 198564 | Agilent38MB | 6:160579629 | 3'UTR    | G/G     | 8.88E-16 | 225 | 99 | 48 | 99 | 0/0 | 0/0 | 0/0 | match | match | match |
| 108971 | TruSeqV2    | 6:160579637 | 3'UTR    | C/C     | 4.44E-16 | 111 | 99 | 46 | 99 | 0/0 | 0/0 | 0/0 | match | match | match |

|        |             |             |          |     |          |     |    |    |    |     |     |     |       |       |       |
|--------|-------------|-------------|----------|-----|----------|-----|----|----|----|-----|-----|-----|-------|-------|-------|
| 115239 | TruSeqV2    | 6:160579637 | 3'UTR    | C/C | 2.22E-15 | 69  | 99 | 38 | 96 | 0/0 | 0/0 | 0/0 | match | match | match |
| 132306 | Agilent38MB | 6:160579637 | 3'UTR    | C/C | 1.33E-15 | 124 | 99 | 38 | 99 | 0/0 | 0/0 | 0/0 | match | match | match |
| 163383 | TruSeqV2    | 6:160579637 | 3'UTR    | C/C | 5.37E-14 | 99  | 99 | 47 | 99 | 0/0 | 0/0 | 0/0 | match | match | match |
| 198564 | Agilent38MB | 6:160579637 | 3'UTR    | C/C | 3.55E-15 | 186 | 99 | 48 | 99 | 0/0 | 0/0 | 0/0 | match | match | match |
| 108971 | TruSeqV2    | 6:160645751 | synon    | G/G | 2.22E-16 | 53  | 99 | 39 | 96 | 0/0 | 0/0 | 0/0 | match | match | match |
| 115239 | TruSeqV2    | 6:160645751 | synon    | G/G | 2.22E-16 | 44  | 99 | 56 | 99 | 0/0 | 0/0 | 0/0 | match | match | match |
| 132306 | Agilent38MB | 6:160645751 | synon    | G/G | 2.22E-16 | 43  | 99 | 36 | 93 | 0/0 | 0/0 | 0/0 | match | match | match |
| 163383 | TruSeqV2    | 6:160645751 | synon    | G/G | 2.22E-16 | 59  | 99 | 38 | 99 | 0/0 | 0/0 | 0/0 | match | match | match |
| 198564 | Agilent38MB | 6:160645751 | synon    | G/G | 4.44E-16 | 84  | 99 | 42 | 99 | 0/0 | 0/0 | 0/0 | match | match | match |
| 108971 | TruSeqV2    | 6:160645832 | synon    | T/T | 4.44E-16 | 67  | 99 | 35 | 99 | 1/1 | 1/1 | 1/1 | match | match | match |
| 115239 | TruSeqV2    | 6:160645832 | synon    | T/T | 6.66E-16 | 48  | 99 | 53 | 99 | 1/1 | 1/1 | 1/1 | match | match | match |
| 132306 | Agilent38MB | 6:160645832 | synon    | T/T | 2.22E-16 | 45  | 99 | 26 | 78 | 1/1 | 1/1 | 1/1 | match | match | match |
| 163383 | TruSeqV2    | 6:160645832 | synon    | T/C | 4.44E-16 | 69  | 99 | 47 | 99 | 0/1 | 0/1 | 0/1 | match | match | match |
| 198564 | Agilent38MB | 6:160645832 | synon    | T/C | 1.55E-15 | 85  | 99 | 43 | 99 | 0/1 | 0/1 | 0/1 | match | match | match |
| 108971 | TruSeqV2    | 6:160662609 | synon    | G/G | 2.22E-16 | 84  | 99 | 34 | 93 | 0/0 | 0/0 | 0/0 | match | match | match |
| 115239 | TruSeqV2    | 6:160662609 | synon    | G/G | 2.22E-16 | 36  | 90 | 42 | 99 | 0/0 | 0/0 | 0/0 | match | match | match |
| 132306 | Agilent38MB | 6:160662609 | synon    | G/G | 2.22E-16 | 96  | 99 | 39 | 99 | 0/0 | 0/0 | 0/0 | match | match | match |
| 163383 | TruSeqV2    | 6:160662609 | synon    | G/G | 2.22E-16 | 64  | 99 | 43 | 99 | 0/0 | 0/0 | 0/0 | match | match | match |
| 198564 | Agilent38MB | 6:160662609 | synon    | G/G | 2.22E-16 | 171 | 99 | 40 | 99 | 0/0 | 0/0 | 0/0 | match | match | match |
| 108971 | TruSeqV2    | 6:160663326 | missense | C/C | 2.22E-16 | 102 | 99 | 35 | 90 | 0/0 | 0/0 | 0/0 | match | match | match |
| 115239 | TruSeqV2    | 6:160663326 | missense | C/C | 2.22E-16 | 71  | 99 | 48 | 99 | 0/0 | 0/0 | 0/0 | match | match | match |
| 132306 | Agilent38MB | 6:160663326 | missense | C/C | 4.44E-16 | 174 | 99 | 28 | 81 | 0/0 | 0/0 | 0/0 | match | match | match |
| 163383 | TruSeqV2    | 6:160663326 | missense | C/C | 4.44E-16 | 93  | 99 | 49 | 99 | 0/0 | 0/0 | 0/0 | match | match | match |
| 198564 | Agilent38MB | 6:160663326 | missense | C/C | 2.33E-14 | 303 | 99 | 39 | 99 | 0/0 | 0/0 | 0/0 | match | match | match |
| 108971 | TruSeqV2    | 6:160663420 | missense | T/T | 6.66E-16 | 107 | 99 | 39 | 99 | 0/0 | 0/0 | 0/0 | match | match | match |
| 115239 | TruSeqV2    | 6:160663420 | missense | T/T | 2.22E-16 | 60  | 99 | 47 | 99 | 0/0 | 0/0 | 0/0 | match | match | match |
| 132306 | Agilent38MB | 6:160663420 | missense | T/T | 2.22E-16 | 165 | 99 | 40 | 99 | 0/0 | 0/0 | 0/0 | match | match | match |
| 163383 | TruSeqV2    | 6:160663420 | missense | T/T | 4.44E-16 | 79  | 99 | 30 | 84 | 0/0 | 0/0 | 0/0 | match | match | match |
| 198564 | Agilent38MB | 6:160663420 | missense | T/T | 1.33E-15 | 302 | 99 | 39 | 99 | 0/0 | 0/0 | 0/0 | match | match | match |
| 108971 | TruSeqV2    | 6:160664680 | missense | G/G | 6.66E-16 | 218 | 99 | 36 | 99 | 0/0 | 0/0 | 0/0 | match | match | match |
| 115239 | TruSeqV2    | 6:160664680 | missense | G/G | 1.63E-13 | 150 | 99 | 29 | 72 | 0/0 | 0/0 | 0/0 | match | match | match |
| 132306 | Agilent38MB | 6:160664680 | missense | G/G | 2.32E-10 | 44  | 93 | 28 | 69 | 0/0 | 0/0 | 0/0 | match | match | match |
| 163383 | TruSeqV2    | 6:160664680 | missense | G/G | 1.78E-13 | 164 | 99 | 27 | 69 | 0/0 | 0/0 | 0/0 | match | match | match |
| 198564 | Agilent38MB | 6:160664680 | missense | G/G | 4.53E-13 | 76  | 99 | 41 | 99 | 0/0 | 0/0 | 0/0 | match | match | match |
| 108971 | TruSeqV2    | 6:160664685 | missense | G/G | 2.22E-16 | 223 | 99 | 35 | 99 | 0/0 | 0/0 | 0/0 | match | match | match |
| 115239 | TruSeqV2    | 6:160664685 | missense | G/G | 2.22E-16 | 152 | 99 | 29 | 81 | 0/0 | 0/0 | 0/0 | match | match | match |
| 132306 | Agilent38MB | 6:160664685 | missense | G/G | 2.22E-16 | 42  | 90 | 28 | 75 | 0/0 | 0/0 | 0/0 | match | match | match |
| 163383 | TruSeqV2    | 6:160664685 | missense | G/G | 2.22E-16 | 174 | 99 | 28 | 75 | 0/0 | 0/0 | 0/0 | match | match | match |

|        |             |             |          |     |          |     |    |    |    |     |     |     |       |       |       |
|--------|-------------|-------------|----------|-----|----------|-----|----|----|----|-----|-----|-----|-------|-------|-------|
| 198564 | Agilent38MB | 6:160664685 | missense | G/G | 4.44E-16 | 72  | 99 | 43 | 99 | 0/0 | 0/0 | 0/0 | match | match | match |
| 108971 | TruSeqV2    | 6:160668283 | missense | G/G | 6.66E-16 | 133 | 99 | 31 | 73 | 0/0 | 0/0 | 0/0 | match | match | match |
| 115239 | TruSeqV2    | 6:160668283 | missense | G/G | 6.66E-16 | 91  | 99 | 20 | 54 | 0/0 | 0/0 | 0/0 | match | match | match |
| 132306 | Agilent38MB | 6:160668283 | missense | G/G | 8.88E-16 | 211 | 99 | 24 | 66 | 0/0 | 0/0 | 0/0 | match | match | match |
| 163383 | TruSeqV2    | 6:160668283 | missense | G/G | 2.22E-16 | 108 | 99 | 28 | 75 | 0/0 | 0/0 | 0/0 | match | match | match |
| 198564 | Agilent38MB | 6:160668283 | missense | G/G | 4.44E-16 | 382 | 99 | 35 | 90 | 0/0 | 0/0 | 0/0 | match | match | match |
| 108971 | TruSeqV2    | 6:160670282 | missense | C/C | 2.22E-16 | 92  | 99 | 43 | 99 | 1/1 | 1/1 | 1/1 | match | match | match |
| 115239 | TruSeqV2    | 6:160670282 | missense | C/C | 2.22E-16 | 62  | 99 | 36 | 99 | 1/1 | 1/1 | 1/1 | match | match | match |
| 132306 | Agilent38MB | 6:160670282 | missense | C/C | 2.22E-16 | 109 | 99 | 39 | 99 | 1/1 | 1/1 | 1/1 | match | match | match |
| 163383 | TruSeqV2    | 6:160670282 | missense | C/A | 8.88E-16 | 84  | 99 | 39 | 99 | 0/1 | 0/1 | 0/1 | match | match | match |
| 198564 | Agilent38MB | 6:160670282 | missense | C/C | 4.44E-16 | 163 | 99 | 57 | 99 | 1/1 | 1/1 | 1/1 | match | match | match |
| 108971 | TruSeqV2    | 6:160671584 | synon    | G/G | 2.44E-15 | 61  | 99 | 38 | 99 | 0/0 | 0/0 | 0/0 | match | match | match |
| 115239 | TruSeqV2    | 6:160671584 | synon    | G/G | 1.11E-15 | 47  | 99 | 43 | 99 | 0/0 | 0/0 | 0/0 | match | match | match |
| 132306 | Agilent38MB | 6:160671584 | synon    | G/G | 2.22E-15 | 258 | 99 | 40 | 99 | 0/0 | 0/0 | 0/0 | match | match | match |
| 163383 | TruSeqV2    | 6:160671584 | synon    | G/G | 1.22E-14 | 61  | 99 | 46 | 99 | 0/0 | 0/0 | 0/0 | match | match | match |
| 198564 | Agilent38MB | 6:160671584 | synon    | G/G | 4.44E-16 | 464 | 99 | 45 | 99 | 0/0 | 0/0 | 0/0 | match | match | match |
| 108971 | TruSeqV2    | 6:160677669 | missense | C/C | 3.77E-15 | 98  | 99 | 36 | 93 | 0/0 | 0/0 | 0/0 | match | match | match |
| 115239 | TruSeqV2    | 6:160677669 | missense | C/C | 1.11E-15 | 73  | 99 | 38 | 99 | 0/0 | 0/0 | 0/0 | match | match | match |
| 132306 | Agilent38MB | 6:160677669 | missense | C/C | 4.44E-16 | 206 | 99 | 35 | 99 | 0/0 | 0/0 | 0/0 | match | match | match |
| 163383 | TruSeqV2    | 6:160677669 | missense | C/C | 1.33E-15 | 103 | 99 | 45 | 99 | 0/0 | 0/0 | 0/0 | match | match | match |
| 198564 | Agilent38MB | 6:160677669 | missense | C/C | 5.55E-15 | 388 | 99 | 32 | 81 | 0/0 | 0/0 | 0/0 | match | match | match |
| 108971 | TruSeqV2    | 6:160677671 | missense | T/T | 2.22E-16 | 99  | 99 | 35 | 90 | 0/0 | 0/0 | 0/0 | match | match | match |
| 115239 | TruSeqV2    | 6:160677671 | missense | T/T | 1.11E-15 | 73  | 99 | 38 | 93 | 0/0 | 0/0 | 0/0 | match | match | match |
| 132306 | Agilent38MB | 6:160677671 | missense | T/T | 2.22E-16 | 214 | 99 | 35 | 96 | 0/0 | 0/0 | 0/0 | match | match | match |
| 163383 | TruSeqV2    | 6:160677671 | missense | T/T | 1.11E-15 | 104 | 99 | 45 | 99 | 0/0 | 0/0 | 0/0 | match | match | match |
| 198564 | Agilent38MB | 6:160677671 | missense | T/T | 5.77E-15 | 414 | 99 | 31 | 84 | 0/0 | 0/0 | 0/0 | match | match | match |
| 108971 | TruSeqV2    | 6:160677683 | missense | A/A | 4.44E-16 | 111 | 99 | 33 | 87 | 0/0 | 0/0 | 0/0 | match | match | match |
| 115239 | TruSeqV2    | 6:160677683 | missense | A/A | 1.78E-15 | 73  | 99 | 35 | 90 | 0/0 | 0/0 | 0/0 | match | match | match |
| 132306 | Agilent38MB | 6:160677683 | missense | A/A | 2.22E-16 | 241 | 99 | 39 | 99 | 0/0 | 0/0 | 0/0 | match | match | match |
| 163383 | TruSeqV2    | 6:160677683 | missense | A/A | 4.44E-16 | 118 | 99 | 43 | 99 | 0/0 | 0/0 | 0/0 | match | match | match |
| 198564 | Agilent38MB | 6:160677683 | missense | A/A | 8.88E-16 | 446 | 99 | 35 | 93 | 0/0 | 0/0 | 0/0 | match | match | match |
| 108971 | TruSeqV2    | 6:160679400 | synon    | C/A | 7.94E-10 | 26  | 99 | 31 | 99 | 0/1 | 0/1 | 0/1 | match | match | match |
| 132306 | Agilent38MB | 6:160679400 | synon    | A/A | 1.98E-13 | 48  | 99 | 24 | 71 | 1/1 | 1/1 | 1/1 | match | match | match |
| 163383 | TruSeqV2    | 6:160679400 | synon    | C/A | 1.85E-12 | 22  | 99 | 35 | 99 | 0/1 | 0/1 | 0/1 | match | match | match |
| 198564 | Agilent38MB | 6:160679400 | synon    | C/A | 1.65E-12 | 87  | 99 | 37 | 99 | 0/1 | 0/1 | 0/1 | match | match | match |
| 108971 | TruSeqV2    | 6:160679630 | missense | G/G | 1.11E-15 | 74  | 99 | 27 | 60 | 0/0 | 0/0 | 0/0 | match | match | match |
| 115239 | TruSeqV2    | 6:160679630 | missense | G/G | 4.44E-16 | 42  | 99 | 21 | 51 | 0/0 | 0/0 | 0/0 | match | match | match |
| 132306 | Agilent38MB | 6:160679630 | missense | G/G | 4.44E-16 | 19  | 39 | 32 | 78 | 0/0 | 0/0 | 0/0 | match | match | match |

|        |             |             |          |     |          |     |    |    |    |     |     |     |       |       |       |
|--------|-------------|-------------|----------|-----|----------|-----|----|----|----|-----|-----|-----|-------|-------|-------|
| 163383 | TruSeqV2    | 6:160679630 | missense | G/G | 4.44E-16 | 54  | 99 | 38 | 93 | 0/0 | 0/0 | 0/0 | match | match | match |
| 198564 | Agilent38MB | 6:160679630 | missense | G/G | 1.33E-15 | 29  | 60 | 44 | 99 | 0/0 | 0/0 | 0/0 | match | match | match |
| 108971 | TruSeqV2    | 6:160679656 | fs       | T/T | 5.98E-11 | 63  | 99 | 31 | 84 | 0/0 | 0/0 | 0/0 | match | match | match |
| 115239 | TruSeqV2    | 6:160679656 | fs       | T/T | 9.09E-13 | 63  | 99 | 31 | 84 | 0/0 | 0/0 | 0/0 | match | match | match |
| 132306 | Agilent38MB | 6:160679656 | fs       | T/T | 1.58E-13 | 63  | 99 | 31 | 84 | 0/0 | 0/0 | 0/0 | match | match | match |
| 163383 | TruSeqV2    | 6:160679656 | fs       | T/T | 5.11E-15 | 63  | 99 | 31 | 84 | 0/0 | 0/0 | 0/0 | match | match | match |
| 198564 | Agilent38MB | 6:160679656 | fs       | T/T | 5.05E-11 | 63  | 99 | 31 | 84 | 0/0 | 0/0 | 0/0 | match | match | match |
| 132306 | Agilent38MB | 6:160769811 | synon    | T/T | 1.23E-13 | 4   | 12 | 7  | 21 | 1/1 | 1/1 | 1/1 | match | match | match |
| 198564 | Agilent38MB | 6:160769811 | synon    | C/T | 3.17E-08 | 9   | 96 | 20 | 99 | 0/1 | 0/1 | 0/1 | match | match | match |
| 108971 | TruSeqV2    | 6:160828142 | synon    | T/T | 6.44E-14 | 190 | 99 | 39 | 99 | 0/0 | 0/0 | 0/0 | match | match | match |
| 115239 | TruSeqV2    | 6:160828142 | synon    | T/T | 2.44E-15 | 126 | 99 | 31 | 87 | 0/0 | 0/0 | 0/0 | match | match | match |
| 132306 | Agilent38MB | 6:160828142 | synon    | T/T | 1.40E-14 | 52  | 99 | 27 | 75 | 0/0 | 0/0 | 0/0 | match | match | match |
| 163383 | TruSeqV2    | 6:160828142 | synon    | T/T | 5.77E-15 | 170 | 99 | 30 | 87 | 0/0 | 0/0 | 0/0 | match | match | match |
| 198564 | Agilent38MB | 6:160828142 | synon    | T/T | 2.46E-14 | 120 | 99 | 37 | 99 | 0/0 | 0/0 | 0/0 | match | match | match |
| 108971 | TruSeqV2    | 6:160858154 | missense | C/C | 6.66E-16 | 164 | 99 | 45 | 99 | 0/0 | 0/0 | 0/0 | match | match | match |
| 115239 | TruSeqV2    | 6:160858154 | missense | C/C | 2.22E-16 | 108 | 99 | 41 | 99 | 0/0 | 0/0 | 0/0 | match | match | match |
| 132306 | Agilent38MB | 6:160858154 | missense | C/C | 6.66E-16 | 84  | 99 | 42 | 99 | 0/0 | 0/0 | 0/0 | match | match | match |
| 163383 | TruSeqV2    | 6:160858154 | missense | C/C | 2.22E-16 | 131 | 99 | 40 | 99 | 0/0 | 0/0 | 0/0 | match | match | match |
| 198564 | Agilent38MB | 6:160858154 | missense | C/C | 1.33E-15 | 177 | 99 | 34 | 93 | 0/0 | 0/0 | 0/0 | match | match | match |
| 108971 | TruSeqV2    | 6:160858188 | synon    | A/A | 5.11E-15 | 141 | 99 | 39 | 99 | 1/1 | 1/1 | 1/1 | match | match | match |
| 115239 | TruSeqV2    | 6:160858188 | synon    | G/G | 2.24E-14 | 94  | 99 | 29 | 81 | 0/0 | 0/0 | 0/0 | match | match | match |
| 132306 | Agilent38MB | 6:160858188 | synon    | G/G | 8.66E-15 | 85  | 99 | 31 | 81 | 0/0 | 0/0 | 0/0 | match | match | match |
| 163383 | TruSeqV2    | 6:160858188 | synon    | G/G | 8.66E-15 | 119 | 99 | 35 | 84 | 0/0 | 0/0 | 0/0 | match | match | match |
| 198564 | Agilent38MB | 6:160858188 | synon    | A/G | 1.55E-15 | 180 | 99 | 37 | 99 | 0/1 | 0/1 | 0/1 | match | match | match |
| 108971 | TruSeqV2    | 6:160864758 | synon    | A/A | 2.22E-16 | 106 | 99 | 35 | 87 | 0/0 | 0/0 | 0/0 | match | match | match |
| 115239 | TruSeqV2    | 6:160864758 | synon    | A/A | 2.22E-16 | 79  | 99 | 31 | 81 | 0/0 | 0/0 | 0/0 | match | match | match |
| 132306 | Agilent38MB | 6:160864758 | synon    | A/A | 2.22E-16 | 24  | 66 | 20 | 48 | 0/0 | 0/0 | 0/0 | match | match | match |
| 163383 | TruSeqV2    | 6:160864758 | synon    | A/A | 2.22E-16 | 95  | 99 | 38 | 99 | 0/0 | 0/0 | 0/0 | match | match | match |
| 198564 | Agilent38MB | 6:160864758 | synon    | A/A | 4.44E-16 | 37  | 90 | 32 | 69 | 0/0 | 0/0 | 0/0 | match | match | match |
| 108971 | TruSeqV2    | 6:18130918  | missense | T/T | 4.66E-15 | 100 | 99 | 39 | 99 | 0/0 | 0/0 | 0/0 | match | match | match |
| 115239 | TruSeqV2    | 6:18130918  | missense | T/T | 6.66E-16 | 57  | 99 | 47 | 99 | 0/0 | 0/0 | 0/0 | match | match | match |
| 132306 | Agilent38MB | 6:18130918  | missense | T/T | 1.78E-15 | 45  | 99 | 33 | 96 | 0/0 | 0/0 | 0/0 | match | match | match |
| 163383 | TruSeqV2    | 6:18130918  | missense | T/T | 2.00E-15 | 114 | 99 | 41 | 96 | 0/0 | 0/0 | 0/0 | match | match | match |
| 198564 | Agilent38MB | 6:18130918  | missense | T/T | 4.02E-14 | 106 | 99 | 42 | 99 | 0/0 | 0/0 | 0/0 | match | match | match |
| 108971 | TruSeqV2    | 6:18130993  | missense | C/C | 6.66E-16 | 94  | 99 | 56 | 99 | 0/0 | 0/0 | 0/0 | match | match | match |
| 115239 | TruSeqV2    | 6:18130993  | missense | C/C | 2.22E-16 | 61  | 99 | 51 | 99 | 0/0 | 0/0 | 0/0 | match | match | match |
| 132306 | Agilent38MB | 6:18130993  | missense | C/C | 2.22E-16 | 77  | 99 | 42 | 99 | 0/0 | 0/0 | 0/0 | match | match | match |
| 163383 | TruSeqV2    | 6:18130993  | missense | C/C | 2.22E-16 | 98  | 99 | 54 | 99 | 0/0 | 0/0 | 0/0 | match | match | match |

|        |             |            |          |     |          |     |    |    |    |     |     |     |       |       |       |
|--------|-------------|------------|----------|-----|----------|-----|----|----|----|-----|-----|-----|-------|-------|-------|
| 198564 | Agilent38MB | 6:18130993 | missense | C/C | 4.44E-16 | 146 | 99 | 47 | 99 | 0/0 | 0/0 | 0/0 | match | match | match |
| 108971 | TruSeqV2    | 6:18131012 | splice   | C/C | 2.22E-16 | 79  | 99 | 54 | 99 | 0/0 | 0/0 | 0/0 | match | match | match |
| 115239 | TruSeqV2    | 6:18131012 | splice   | C/C | 2.22E-16 | 48  | 99 | 49 | 99 | 0/0 | 0/0 | 0/0 | match | match | match |
| 132306 | Agilent38MB | 6:18131012 | splice   | C/C | 2.22E-16 | 43  | 96 | 42 | 99 | 0/0 | 0/0 | 0/0 | match | match | match |
| 163383 | TruSeqV2    | 6:18131012 | splice   | C/C | 2.22E-16 | 88  | 99 | 54 | 99 | 0/0 | 0/0 | 0/0 | match | match | match |
| 198564 | Agilent38MB | 6:18131012 | splice   | C/C | 2.18E-14 | 99  | 99 | 50 | 99 | 0/0 | 0/0 | 0/0 | match | match | match |
| 108971 | TruSeqV2    | 6:18134078 | missense | C/C | 8.22E-15 | 70  | 99 | 45 | 99 | 0/0 | 0/0 | 0/0 | match | match | match |
| 115239 | TruSeqV2    | 6:18134078 | missense | C/C | 3.77E-15 | 57  | 99 | 51 | 99 | 0/0 | 0/0 | 0/0 | match | match | match |
| 132306 | Agilent38MB | 6:18134078 | missense | C/C | 1.11E-13 | 75  | 99 | 35 | 99 | 0/0 | 0/0 | 0/0 | match | match | match |
| 163383 | TruSeqV2    | 6:18134078 | missense | C/C | 7.53E-14 | 80  | 99 | 36 | 78 | 0/0 | 0/0 | 0/0 | match | match | match |
| 198564 | Agilent38MB | 6:18134078 | missense | C/C | 4.53E-13 | 160 | 99 | 31 | 90 | 0/0 | 0/0 | 0/0 | match | match | match |
| 108971 | TruSeqV2    | 6:18139214 | synon    | G/A | 2.31E-13 | 67  | 99 | 45 | 99 | 0/1 | 0/1 | 0/1 | match | match | match |
| 115239 | TruSeqV2    | 6:18139214 | synon    | A/A | 1.11E-15 | 38  | 99 | 41 | 85 | 1/1 | 1/1 | 1/1 | match | match | match |
| 132306 | Agilent38MB | 6:18139214 | synon    | A/A | 1.55E-15 | 134 | 99 | 41 | 99 | 1/1 | 1/1 | 1/1 | match | match | match |
| 163383 | TruSeqV2    | 6:18139214 | synon    | G/A | 6.11E-14 | 75  | 99 | 43 | 99 | 0/1 | 0/1 | 0/1 | match | match | match |
| 198564 | Agilent38MB | 6:18139214 | synon    | G/A | 9.90E-14 | 254 | 99 | 54 | 99 | 0/1 | 0/1 | 0/1 | match | match | match |
| 108971 | TruSeqV2    | 6:18139228 | missense | C/C | 6.73E-14 | 79  | 99 | 52 | 99 | 0/0 | 0/0 | 0/0 | match | match | match |
| 115239 | TruSeqV2    | 6:18139228 | missense | C/C | 1.82E-14 | 45  | 99 | 46 | 99 | 0/0 | 0/0 | 0/0 | match | match | match |
| 132306 | Agilent38MB | 6:18139228 | missense | C/C | 7.71E-13 | 148 | 99 | 43 | 99 | 0/0 | 0/0 | 0/0 | match | match | match |
| 163383 | TruSeqV2    | 6:18139228 | missense | C/C | 2.78E-14 | 81  | 99 | 45 | 99 | 0/0 | 0/0 | 0/0 | match | match | match |
| 198564 | Agilent38MB | 6:18139228 | missense | C/C | 4.58E-13 | 285 | 99 | 56 | 99 | 0/0 | 0/0 | 0/0 | match | match | match |
| 108971 | TruSeqV2    | 6:18143901 | stop     | C/C | 1.33E-15 | 84  | 99 | 56 | 99 | 0/0 | 0/0 | 0/0 | match | match | match |
| 115239 | TruSeqV2    | 6:18143901 | stop     | C/C | 2.22E-16 | 47  | 99 | 51 | 99 | 0/0 | 0/0 | 0/0 | match | match | match |
| 132306 | Agilent38MB | 6:18143901 | stop     | C/C | 2.22E-16 | 50  | 99 | 42 | 99 | 0/0 | 0/0 | 0/0 | match | match | match |
| 163383 | TruSeqV2    | 6:18143901 | stop     | C/C | 4.44E-16 | 64  | 99 | 48 | 99 | 0/0 | 0/0 | 0/0 | match | match | match |
| 198564 | Agilent38MB | 6:18143901 | stop     | C/C | 4.55E-14 | 64  | 99 | 52 | 99 | 0/0 | 0/0 | 0/0 | match | match | match |
| 108971 | TruSeqV2    | 6:18143955 | missense | C/C | 2.22E-16 | 67  | 99 | 48 | 99 | 0/0 | 0/0 | 0/0 | match | match | match |
| 115239 | TruSeqV2    | 6:18143955 | missense | C/C | 2.22E-16 | 53  | 99 | 47 | 98 | 0/0 | 0/0 | 0/0 | match | match | match |
| 132306 | Agilent38MB | 6:18143955 | missense | C/C | 2.22E-16 | 56  | 99 | 40 | 99 | 0/0 | 0/0 | 0/0 | match | match | match |
| 163383 | TruSeqV2    | 6:18143955 | missense | C/C | 2.22E-16 | 63  | 99 | 51 | 99 | 0/0 | 0/0 | 0/0 | match | match | match |
| 198564 | Agilent38MB | 6:18143955 | missense | C/C | 4.44E-16 | 90  | 99 | 38 | 99 | 0/0 | 0/0 | 0/0 | match | match | match |
| 108971 | TruSeqV2    | 6:32008469 | missense | G/G | 7.29E-13 | 441 | 99 | 2  | 6  | 0/0 | 0/0 | 0/0 | match | match | match |
| 132306 | Agilent38MB | 6:32008469 | missense | G/G | 1.31E-11 | 29  | 78 | 12 | 36 | 0/0 | 0/0 | 0/0 | match | match | match |
| 163383 | TruSeqV2    | 6:32008469 | missense | G/G | 4.61E-09 | 271 | 99 | 8  | 24 | 0/0 | 0/0 | 0/0 | match | match | match |
| 198564 | Agilent38MB | 6:32008469 | missense | G/G | 1.82E-09 | 48  | 99 | 2  | 6  | 0/0 | 0/0 | 0/0 | match | match | match |
| 108971 | TruSeqV2    | 6:32008648 | missense | C/C | 1.32E-09 | 104 | 99 | 38 | 99 | 0/0 | 0/0 | 0/0 | match | match | match |
| 132306 | Agilent38MB | 6:32008648 | missense | C/C | 3.11E-10 | 1   | 3  | 18 | 45 | 0/0 | 0/0 | 0/0 | match | match | match |
| 163383 | TruSeqV2    | 6:32008648 | missense | C/C | 2.24E-09 | 80  | 99 | 23 | 54 | 0/0 | 0/0 | 0/0 | match | match | match |

|        |             |            |          |     |          |    |    |    |    |     |     |     |       |       |       |
|--------|-------------|------------|----------|-----|----------|----|----|----|----|-----|-----|-----|-------|-------|-------|
| 108971 | TruSeqV2    | 6:32008696 | missense | G/G | 2.22E-15 | 55 | 99 | 8  | 15 | 0/0 | 0/0 | 0/0 | match | match | match |
| 163383 | TruSeqV2    | 6:32008696 | missense | G/G | 5.11E-15 | 38 | 96 | 4  | 9  | 0/0 | 0/0 | 0/0 | match | match | match |
| 198564 | Agilent38MB | 6:35311988 | intronic | G/G | 8.77E-14 | 2  | 6  | 42 | 99 | 0/0 | 0/0 | 0/0 | match | match | match |
| 132306 | Agilent38MB | 6:35312254 | intronic | G/G | 4.44E-16 | 1  | 3  | 36 | 96 | 0/0 | 0/0 | 0/0 | match | match | match |
| 163383 | TruSeqV2    | 6:35312254 | intronic | G/G | 4.44E-16 | 1  | 2  | 42 | 99 | 0/0 | 0/0 | 0/0 | match | match | match |
| 198564 | Agilent38MB | 6:35312254 | intronic | G/G | 2.13E-14 | 1  | 3  | 45 | 99 | 0/0 | 0/0 | 0/0 | match | match | match |
| 198564 | Agilent38MB | 6:35317301 | intronic | C/C | 6.59E-14 | 1  | 3  | 26 | 72 | 0/0 | 0/0 | 0/0 | match | match | match |
| 132306 | Agilent38MB | 6:35320447 | intronic | C/C | 4.44E-16 | 3  | 9  | 37 | 99 | 0/0 | 0/0 | 0/0 | match | match | match |
| 198564 | Agilent38MB | 6:35320447 | intronic | C/C | 2.22E-16 | 3  | 6  | 31 | 81 | 0/0 | 0/0 | 0/0 | match | match | match |
| 132306 | Agilent38MB | 6:35322975 | intronic | A/A | 1.55E-15 | 4  | 12 | 34 | 96 | 0/0 | 0/0 | 0/0 | match | match | match |
| 115239 | TruSeqV2    | 6:35324741 | intronic | T/T | 8.88E-16 | 1  | 3  | 40 | 99 | 0/0 | 0/0 | 0/0 | match | match | match |
| 132306 | Agilent38MB | 6:35324741 | intronic | T/T | 4.44E-16 | 6  | 12 | 40 | 96 | 0/0 | 0/0 | 0/0 | match | match | match |
| 132306 | Agilent38MB | 6:35330030 | intronic | T/T | 1.04E-10 | 1  | 3  | 35 | 84 | 0/0 | 0/0 | 0/0 | match | match | match |
| 163383 | TruSeqV2    | 6:35330030 | intronic | T/T | 8.88E-16 | 1  | 3  | 33 | 90 | 0/0 | 0/0 | 0/0 | match | match | match |
| 198564 | Agilent38MB | 6:35330030 | intronic | T/T | 3.90E-09 | 2  | 3  | 34 | 90 | 0/0 | 0/0 | 0/0 | match | match | match |
| 132306 | Agilent38MB | 6:35330898 | intronic | T/T | 4.44E-16 | 2  | 6  | 36 | 96 | 0/0 | 0/0 | 0/0 | match | match | match |
| 198564 | Agilent38MB | 6:35338106 | intronic | C/C | 3.55E-15 | 4  | 12 | 44 | 99 | 0/0 | 0/0 | 0/0 | match | match | match |
| 132306 | Agilent38MB | 6:35339035 | intronic | C/C | 4.26E-13 | 3  | 9  | 23 | 66 | 0/0 | 0/0 | 0/0 | match | match | match |
| 163383 | TruSeqV2    | 6:35339035 | intronic | C/C | 8.88E-16 | 2  | 6  | 27 | 66 | 0/0 | 0/0 | 0/0 | match | match | match |
| 198564 | Agilent38MB | 6:35339035 | intronic | C/C | 2.22E-16 | 3  | 6  | 23 | 63 | 0/0 | 0/0 | 0/0 | match | match | match |
| 198564 | Agilent38MB | 6:35350042 | intronic | C/C | 2.43E-11 | 2  | 6  | 34 | 90 | 0/0 | 0/0 | 0/0 | match | match | match |
| 198564 | Agilent38MB | 6:35350759 | intronic | G/G | 2.56E-08 | 4  | 6  | 45 | 99 | 0/0 | 0/0 | 0/0 | match | match | match |
| 108971 | TruSeqV2    | 6:35356161 | intronic | G/G | 5.77E-11 | 1  | 3  | 39 | 99 | 0/0 | 0/0 | 0/0 | match | match | match |
| 198564 | Agilent38MB | 6:35356161 | intronic | G/G | 3.48E-09 | 5  | 9  | 38 | 96 | 0/0 | 0/0 | 0/0 | match | match | match |
| 132306 | Agilent38MB | 6:35357693 | intronic | C/C | 6.66E-16 | 1  | 3  | 29 | 81 | 0/0 | 0/0 | 0/0 | match | match | match |
| 198564 | Agilent38MB | 6:35357693 | intronic | C/C | 4.44E-16 | 1  | 3  | 37 | 99 | 0/0 | 0/0 | 0/0 | match | match | match |
| 108971 | TruSeqV2    | 6:35359874 | intronic | G/G | 2.75E-11 | 1  | 3  | 37 | 99 | 0/0 | 0/0 | 0/0 | match | match | match |
| 132306 | Agilent38MB | 6:35359874 | intronic | G/G | 9.77E-15 | 2  | 3  | 21 | 48 | 0/0 | 0/0 | 0/0 | match | match | match |
| 163383 | TruSeqV2    | 6:35362848 | intronic | T/T | 4.44E-16 | 1  | 3  | 18 | 42 | 0/0 | 0/0 | 0/0 | match | match | match |
| 198564 | Agilent38MB | 6:35362848 | intronic | T/T | 8.88E-16 | 3  | 9  | 23 | 57 | 0/0 | 0/0 | 0/0 | match | match | match |
| 198564 | Agilent38MB | 6:35363730 | intronic | G/G | 6.20E-11 | 3  | 9  | 42 | 99 | 0/0 | 0/0 | 0/0 | match | match | match |
| 132306 | Agilent38MB | 6:35371753 | intronic | G/G | 1.78E-15 | 3  | 9  | 29 | 87 | 1/1 | 1/1 | 1/1 | match | match | match |
| 198564 | Agilent38MB | 6:35371753 | intronic | G/G | 8.88E-16 | 4  | 12 | 40 | 99 | 1/1 | 1/1 | 1/1 | match | match | match |
| 132306 | Agilent38MB | 6:35374466 | intronic | A/A | 4.44E-16 | 2  | 6  | 36 | 99 | 1/1 | 1/1 | 1/1 | match | match | match |
| 198564 | Agilent38MB | 6:35374466 | intronic | A/A | 6.66E-16 | 2  | 6  | 33 | 99 | 1/1 | 1/1 | 1/1 | match | match | match |
| 108971 | TruSeqV2    | 6:35375526 | intronic | C/C | 1.11E-15 | 1  | 3  | 37 | 89 | 0/0 | 0/0 | 0/0 | match | match | match |
| 132306 | Agilent38MB | 6:35376350 | intronic | A/A | 1.33E-15 | 2  | 5  | 33 | 87 | 0/0 | 0/0 | 0/0 | match | match | match |
| 198564 | Agilent38MB | 6:35376679 | intronic | A/A | 4.44E-16 | 6  | 17 | 38 | 99 | 0/0 | 0/0 | 0/0 | match | match | match |

|        |             |            |          |     |          |     |    |    |    |     |     |     |       |       |       |
|--------|-------------|------------|----------|-----|----------|-----|----|----|----|-----|-----|-----|-------|-------|-------|
| 198564 | Agilent38MB | 6:35376713 | intronic | A/A | 1.33E-15 | 5   | 14 | 48 | 99 | 0/0 | 0/0 | 0/0 | match | match | match |
| 198564 | Agilent38MB | 6:35377301 | intronic | A/A | 7.44E-11 | 2   | 6  | 38 | 61 | 1/1 | 1/1 | 1/1 | match | match | match |
| 108971 | TruSeqV2    | 6:35391787 | synon    | T/T | 1.11E-15 | 133 | 99 | 25 | 74 | 1/1 | 1/1 | 1/1 | match | match | match |
| 115239 | TruSeqV2    | 6:35391787 | synon    | T/T | 8.88E-16 | 70  | 99 | 15 | 18 | 1/1 | 1/1 | 1/1 | match | match | match |
| 132306 | Agilent38MB | 6:35391787 | synon    | T/T | 6.66E-16 | 20  | 60 | 23 | 69 | 1/1 | 1/1 | 1/1 | match | match | match |
| 163383 | TruSeqV2    | 6:35391787 | synon    | T/T | 8.88E-16 | 84  | 99 | 24 | 71 | 1/1 | 1/1 | 1/1 | match | match | match |
| 198564 | Agilent38MB | 6:35391787 | synon    | T/T | 2.00E-15 | 48  | 99 | 31 | 92 | 1/1 | 1/1 | 1/1 | match | match | match |
| 108971 | TruSeqV2    | 6:35395578 | 3'UTR    | G/G | 6.88E-15 | 89  | 99 | 34 | 93 | 0/0 | 0/0 | 0/0 | match | match | match |
| 115239 | TruSeqV2    | 6:35395578 | 3'UTR    | G/G | 1.11E-15 | 63  | 99 | 18 | 51 | 0/0 | 0/0 | 0/0 | match | match | match |
| 132306 | Agilent38MB | 6:35395578 | 3'UTR    | G/G | 1.33E-15 | 1   | 3  | 30 | 90 | 0/0 | 0/0 | 0/0 | match | match | match |
| 163383 | TruSeqV2    | 6:35395578 | 3'UTR    | G/G | 2.00E-15 | 70  | 99 | 43 | 99 | 0/0 | 0/0 | 0/0 | match | match | match |
| 198564 | Agilent38MB | 6:35395578 | 3'UTR    | G/G | 6.66E-16 | 5   | 12 | 41 | 99 | 0/0 | 0/0 | 0/0 | match | match | match |
| 132306 | Agilent38MB | 6:43264787 | promoter | T/T | 2.22E-16 | 2   | 6  | 29 | 87 | 1/1 | 1/1 | 1/1 | match | match | match |
| 108971 | TruSeqV2    | 6:43269348 | missense | C/C | 4.44E-16 | 164 | 99 | 30 | 72 | 0/0 | 0/0 | 0/0 | match | match | match |
| 115239 | TruSeqV2    | 6:43269348 | missense | C/C | 6.66E-16 | 99  | 99 | 21 | 57 | 0/0 | 0/0 | 0/0 | match | match | match |
| 132306 | Agilent38MB | 6:43269348 | missense | C/C | 4.44E-16 | 88  | 99 | 26 | 72 | 0/0 | 0/0 | 0/0 | match | match | match |
| 163383 | TruSeqV2    | 6:43269348 | missense | C/C | 4.44E-16 | 112 | 99 | 22 | 63 | 0/0 | 0/0 | 0/0 | match | match | match |
| 198564 | Agilent38MB | 6:43269348 | missense | C/C | 6.66E-16 | 135 | 99 | 39 | 99 | 0/0 | 0/0 | 0/0 | match | match | match |
| 108971 | TruSeqV2    | 6:43269386 | synon    | C/C | 1.33E-15 | 187 | 99 | 30 | 72 | 0/0 | 0/0 | 0/0 | match | match | match |
| 115239 | TruSeqV2    | 6:43269386 | synon    | C/C | 6.66E-16 | 110 | 99 | 32 | 81 | 0/0 | 0/0 | 0/0 | match | match | match |
| 132306 | Agilent38MB | 6:43269386 | synon    | C/C | 6.66E-16 | 65  | 99 | 34 | 90 | 0/0 | 0/0 | 0/0 | match | match | match |
| 163383 | TruSeqV2    | 6:43269386 | synon    | C/C | 8.88E-16 | 139 | 99 | 30 | 84 | 0/0 | 0/0 | 0/0 | match | match | match |
| 198564 | Agilent38MB | 6:43269386 | synon    | C/C | 6.66E-16 | 134 | 99 | 35 | 96 | 0/0 | 0/0 | 0/0 | match | match | match |
| 108971 | TruSeqV2    | 6:43270097 | synon    | C/C | 1.78E-15 | 143 | 99 | 32 | 94 | 1/1 | 1/1 | 1/1 | match | match | match |
| 115239 | TruSeqV2    | 6:43270097 | synon    | C/C | 2.44E-15 | 88  | 99 | 15 | 45 | 1/1 | 1/1 | 1/1 | match | match | match |
| 132306 | Agilent38MB | 6:43270097 | synon    | C/C | 2.00E-15 | 27  | 81 | 29 | 87 | 1/1 | 1/1 | 1/1 | match | match | match |
| 163383 | TruSeqV2    | 6:43270097 | synon    | C/C | 2.89E-15 | 136 | 99 | 36 | 99 | 1/1 | 1/1 | 1/1 | match | match | match |
| 198564 | Agilent38MB | 6:43270097 | synon    | C/C | 3.33E-15 | 41  | 99 | 35 | 99 | 1/1 | 1/1 | 1/1 | match | match | match |
| 108971 | TruSeqV2    | 6:43270151 | synon    | C/T | 9.33E-15 | 82  | 99 | 13 | 99 | 0/1 | 0/1 | 0/1 | match | match | match |
| 115239 | TruSeqV2    | 6:43270151 | synon    | C/T | 2.66E-15 | 61  | 99 | 16 | 99 | 0/1 | 0/1 | 0/1 | match | match | match |
| 132306 | Agilent38MB | 6:43270151 | synon    | C/T | 2.00E-15 | 12  | 99 | 25 | 99 | 0/1 | 0/1 | 0/1 | match | match | match |
| 163383 | TruSeqV2    | 6:43270151 | synon    | C/T | 3.11E-15 | 93  | 99 | 26 | 99 | 0/1 | 0/1 | 0/1 | match | match | match |
| 198564 | Agilent38MB | 6:43270151 | synon    | C/T | 2.00E-15 | 21  | 99 | 30 | 99 | 0/1 | 0/1 | 0/1 | match | match | match |
| 108971 | TruSeqV2    | 6:43270326 | intronic | G/G | 1.11E-15 | 63  | 99 | 41 | 99 | 1/1 | 1/1 | 1/1 | match | match | match |
| 115239 | TruSeqV2    | 6:43270326 | intronic | G/G | 1.33E-15 | 47  | 99 | 18 | 54 | 1/1 | 1/1 | 1/1 | match | match | match |
| 132306 | Agilent38MB | 6:43270326 | intronic | G/G | 1.33E-15 | 6   | 18 | 29 | 86 | 1/1 | 1/1 | 1/1 | match | match | match |
| 163383 | TruSeqV2    | 6:43270326 | intronic | G/G | 8.88E-16 | 52  | 99 | 19 | 57 | 1/1 | 1/1 | 1/1 | match | match | match |
| 198564 | Agilent38MB | 6:43270326 | intronic | G/G | 4.66E-15 | 9   | 27 | 30 | 90 | 1/1 | 1/1 | 1/1 | match | match | match |

|        |             |            |          |     |          |     |    |    |    |     |     |     |       |       |       |
|--------|-------------|------------|----------|-----|----------|-----|----|----|----|-----|-----|-----|-------|-------|-------|
| 108971 | TruSeqV2    | 6:43273604 | missense | A/A | 2.00E-15 | 65  | 99 | 41 | 99 | 0/0 | 0/0 | 0/0 | match | match | match |
| 115239 | TruSeqV2    | 6:43273604 | missense | A/A | 8.88E-16 | 48  | 99 | 26 | 57 | 0/0 | 0/0 | 0/0 | match | match | match |
| 132306 | Agilent38MB | 6:43273604 | missense | A/G | 8.88E-16 | 53  | 99 | 33 | 99 | 0/1 | 0/1 | 0/1 | match | match | match |
| 163383 | TruSeqV2    | 6:43273604 | missense | A/A | 8.88E-16 | 59  | 99 | 41 | 99 | 0/0 | 0/0 | 0/0 | match | match | match |
| 198564 | Agilent38MB | 6:43273604 | missense | A/A | 6.66E-16 | 110 | 99 | 38 | 99 | 0/0 | 0/0 | 0/0 | match | match | match |
| 108971 | TruSeqV2    | 6:44197181 | synon    | G/G | 3.40E-13 | 157 | 99 | 37 | 94 | 0/0 | 0/0 | 0/0 | match | match | match |
| 115239 | TruSeqV2    | 6:44197181 | synon    | G/G | 2.89E-15 | 100 | 99 | 27 | 69 | 0/0 | 0/0 | 0/0 | match | match | match |
| 132306 | Agilent38MB | 6:44197181 | synon    | G/G | 6.00E-15 | 143 | 99 | 29 | 81 | 0/0 | 0/0 | 0/0 | match | match | match |
| 163383 | TruSeqV2    | 6:44197181 | synon    | G/G | 7.77E-15 | 129 | 99 | 30 | 84 | 0/0 | 0/0 | 0/0 | match | match | match |
| 198564 | Agilent38MB | 6:44197181 | synon    | G/G | 3.94E-12 | 352 | 99 | 39 | 99 | 0/0 | 0/0 | 0/0 | match | match | match |
| 108971 | TruSeqV2    | 6:44198312 | synon    | G/G | 6.66E-16 | 246 | 99 | 28 | 72 | 0/0 | 0/0 | 0/0 | match | match | match |
| 115239 | TruSeqV2    | 6:44198312 | synon    | G/G | 1.11E-15 | 151 | 99 | 19 | 42 | 0/0 | 0/0 | 0/0 | match | match | match |
| 132306 | Agilent38MB | 6:44198312 | synon    | G/G | 2.71E-14 | 61  | 99 | 24 | 60 | 0/0 | 0/0 | 0/0 | match | match | match |
| 163383 | TruSeqV2    | 6:44198312 | synon    | G/G | 6.66E-16 | 210 | 99 | 22 | 51 | 0/0 | 0/0 | 0/0 | match | match | match |
| 198564 | Agilent38MB | 6:44198312 | synon    | G/G | 4.44E-16 | 118 | 99 | 21 | 57 | 0/0 | 0/0 | 0/0 | match | match | match |
| 108971 | TruSeqV2    | 6:44198362 | missense | T/T | 4.44E-16 | 197 | 99 | 34 | 99 | 0/0 | 0/0 | 0/0 | match | match | match |
| 115239 | TruSeqV2    | 6:44198362 | missense | T/T | 4.44E-16 | 130 | 99 | 9  | 27 | 0/0 | 0/0 | 0/0 | match | match | match |
| 132306 | Agilent38MB | 6:44198362 | missense | T/T | 4.44E-16 | 74  | 99 | 21 | 57 | 0/0 | 0/0 | 0/0 | match | match | match |
| 163383 | TruSeqV2    | 6:44198362 | missense | T/T | 6.66E-16 | 166 | 99 | 26 | 75 | 0/0 | 0/0 | 0/0 | match | match | match |
| 198564 | Agilent38MB | 6:44198362 | missense | T/T | 4.44E-16 | 98  | 99 | 31 | 81 | 0/0 | 0/0 | 0/0 | match | match | match |
| 108971 | TruSeqV2    | 6:44198402 | synon    | G/G | 3.11E-15 | 97  | 99 | 31 | 84 | 0/0 | 0/0 | 0/0 | match | match | match |
| 115239 | TruSeqV2    | 6:44198402 | synon    | G/G | 8.93E-14 | 64  | 99 | 13 | 39 | 0/0 | 0/0 | 0/0 | match | match | match |
| 132306 | Agilent38MB | 6:44198402 | synon    | G/G | 8.88E-15 | 50  | 90 | 17 | 48 | 0/0 | 0/0 | 0/0 | match | match | match |
| 163383 | TruSeqV2    | 6:44198402 | synon    | G/G | 1.58E-14 | 86  | 99 | 28 | 75 | 0/0 | 0/0 | 0/0 | match | match | match |
| 198564 | Agilent38MB | 6:44198402 | synon    | G/G | 1.11E-15 | 65  | 99 | 38 | 99 | 0/0 | 0/0 | 0/0 | match | match | match |
| 108971 | TruSeqV2    | 6:44199202 | splice   | C/C | 8.88E-16 | 113 | 99 | 37 | 99 | 0/0 | 0/0 | 0/0 | match | match | match |
| 115239 | TruSeqV2    | 6:44199202 | splice   | C/C | 3.33E-15 | 92  | 99 | 35 | 90 | 0/0 | 0/0 | 0/0 | match | match | match |
| 132306 | Agilent38MB | 6:44199202 | splice   | C/C | 1.33E-15 | 32  | 63 | 40 | 93 | 0/0 | 0/0 | 0/0 | match | match | match |
| 163383 | TruSeqV2    | 6:44199202 | splice   | C/C | 1.55E-15 | 81  | 99 | 27 | 81 | 0/0 | 0/0 | 0/0 | match | match | match |
| 198564 | Agilent38MB | 6:44199202 | splice   | C/C | 6.66E-16 | 61  | 99 | 35 | 81 | 0/0 | 0/0 | 0/0 | match | match | match |
| 108971 | TruSeqV2    | 6:44200105 | synon    | T/T | 3.77E-15 | 191 | 99 | 50 | 99 | 0/0 | 0/0 | 0/0 | match | match | match |
| 115239 | TruSeqV2    | 6:44200105 | synon    | T/T | 6.66E-16 | 112 | 99 | 26 | 69 | 0/0 | 0/0 | 0/0 | match | match | match |
| 132306 | Agilent38MB | 6:44200105 | synon    | T/T | 2.00E-15 | 158 | 99 | 29 | 75 | 0/0 | 0/0 | 0/0 | match | match | match |
| 163383 | TruSeqV2    | 6:44200105 | synon    | T/T | 1.55E-15 | 130 | 99 | 32 | 84 | 0/0 | 0/0 | 0/0 | match | match | match |
| 198564 | Agilent38MB | 6:44200105 | synon    | T/T | 1.04E-14 | 305 | 99 | 36 | 90 | 0/0 | 0/0 | 0/0 | match | match | match |
| 108971 | TruSeqV2    | 6:44200655 | missense | G/G | 8.88E-16 | 130 | 99 | 33 | 84 | 0/0 | 0/0 | 0/0 | match | match | match |
| 115239 | TruSeqV2    | 6:44200655 | missense | G/G | 6.66E-16 | 78  | 99 | 23 | 69 | 0/0 | 0/0 | 0/0 | match | match | match |
| 132306 | Agilent38MB | 6:44200655 | missense | G/G | 1.55E-15 | 157 | 99 | 48 | 99 | 0/0 | 0/0 | 0/0 | match | match | match |



|        |             |            |          |     |          |     |    |    |    |     |     |     |       |       |       |
|--------|-------------|------------|----------|-----|----------|-----|----|----|----|-----|-----|-----|-------|-------|-------|
| 163383 | TruSeqV2    | 6:44200655 | missense | G/G | 8.88E-16 | 96  | 99 | 34 | 93 | 0/0 | 0/0 | 0/0 | match | match | match |
| 198564 | Agilent38MB | 6:44200655 | missense | G/G | 6.66E-16 | 350 | 99 | 49 | 99 | 0/0 | 0/0 | 0/0 | match | match | match |
| 108971 | TruSeqV2    | 6:44201311 | 3'UTR    | C/C | 3.60E-13 | 240 | 99 | 38 | 99 | 0/0 | 0/0 | 0/0 | match | match | match |
| 115239 | TruSeqV2    | 6:44201311 | 3'UTR    | C/C | 1.51E-14 | 155 | 99 | 22 | 51 | 0/0 | 0/0 | 0/0 | match | match | match |
| 132306 | Agilent38MB | 6:44201311 | 3'UTR    | C/C | 8.59E-13 | 50  | 99 | 43 | 99 | 0/0 | 0/0 | 0/0 | match | match | match |
| 163383 | TruSeqV2    | 6:44201311 | 3'UTR    | C/C | 1.41E-13 | 185 | 99 | 45 | 99 | 0/0 | 0/0 | 0/0 | match | match | match |
| 198564 | Agilent38MB | 6:44201311 | 3'UTR    | C/C | 8.24E-14 | 65  | 99 | 43 | 99 | 0/0 | 0/0 | 0/0 | match | match | match |
| 108971 | TruSeqV2    | 6:44201707 | 3'UTR    | G/G | 1.11E-15 | 215 | 99 | 37 | 98 | 0/0 | 0/0 | 0/0 | match | match | match |
| 115239 | TruSeqV2    | 6:44201707 | 3'UTR    | G/G | 3.11E-15 | 131 | 99 | 24 | 63 | 0/0 | 0/0 | 0/0 | match | match | match |
| 132306 | Agilent38MB | 6:44201707 | 3'UTR    | G/G | 4.66E-15 | 1   | 3  | 32 | 96 | 0/0 | 0/0 | 0/0 | match | match | match |
| 163383 | TruSeqV2    | 6:44201707 | 3'UTR    | G/G | 6.82E-14 | 171 | 99 | 38 | 99 | 0/0 | 0/0 | 0/0 | match | match | match |
| 198564 | Agilent38MB | 6:44201707 | 3'UTR    | G/G | 1.71E-14 | 4   | 12 | 52 | 99 | 0/0 | 0/0 | 0/0 | match | match | match |
| 108971 | TruSeqV2    | 6:46563817 | missense | A/A | 3.11E-15 | 34  | 87 | 44 | 99 | 0/0 | 0/0 | 0/0 | match | match | match |
| 115239 | TruSeqV2    | 6:46563817 | missense | A/A | 2.66E-15 | 18  | 51 | 41 | 84 | 0/0 | 0/0 | 0/0 | match | match | match |
| 132306 | Agilent38MB | 6:46563817 | missense | A/A | 7.77E-15 | 69  | 99 | 28 | 73 | 0/0 | 0/0 | 0/0 | match | match | match |
| 163383 | TruSeqV2    | 6:46563817 | missense | A/A | 2.89E-15 | 21  | 57 | 41 | 99 | 0/0 | 0/0 | 0/0 | match | match | match |
| 198564 | Agilent38MB | 6:46563817 | missense | T/A | 4.44E-15 | 87  | 99 | 50 | 99 | 0/1 | 0/1 | 0/1 | match | match | match |
| 108971 | TruSeqV2    | 6:46609905 | missense | C/C | 6.22E-15 | 19  | 54 | 46 | 99 | 0/0 | 0/0 | 0/0 | match | match | match |
| 115239 | TruSeqV2    | 6:46609905 | missense | C/C | 2.44E-15 | 13  | 39 | 48 | 99 | 0/0 | 0/0 | 0/0 | match | match | match |
| 132306 | Agilent38MB | 6:46609905 | missense | C/C | 9.33E-15 | 60  | 99 | 41 | 99 | 0/0 | 0/0 | 0/0 | match | match | match |
| 163383 | TruSeqV2    | 6:46609905 | missense | C/C | 4.88E-15 | 28  | 78 | 52 | 99 | 0/0 | 0/0 | 0/0 | match | match | match |
| 198564 | Agilent38MB | 6:46609905 | missense | C/C | 1.53E-12 | 113 | 99 | 45 | 99 | 0/0 | 0/0 | 0/0 | match | match | match |
| 108971 | TruSeqV2    | 6:46620271 | missense | G/G | 4.66E-15 | 137 | 99 | 36 | 99 | 0/0 | 0/0 | 0/0 | match | match | match |
| 115239 | TruSeqV2    | 6:46620271 | missense | G/G | 6.66E-15 | 94  | 99 | 40 | 99 | 0/0 | 0/0 | 0/0 | match | match | match |
| 132306 | Agilent38MB | 6:46620271 | missense | G/G | 6.66E-16 | 68  | 99 | 34 | 99 | 0/0 | 0/0 | 0/0 | match | match | match |
| 163383 | TruSeqV2    | 6:46620271 | missense | G/G | 1.33E-15 | 95  | 99 | 43 | 99 | 0/0 | 0/0 | 0/0 | match | match | match |
| 198564 | Agilent38MB | 6:46620271 | missense | G/G | 6.44E-15 | 80  | 99 | 40 | 99 | 0/0 | 0/0 | 0/0 | match | match | match |
| 108971 | TruSeqV2    | 6:46620437 | 5'UTR    | G/G | 1.04E-12 | 191 | 99 | 31 | 87 | 0/0 | 0/0 | 0/0 | match | match | match |
| 115239 | TruSeqV2    | 6:46620437 | 5'UTR    | G/G | 4.44E-16 | 126 | 99 | 22 | 63 | 0/0 | 0/0 | 0/0 | match | match | match |
| 132306 | Agilent38MB | 6:46620437 | 5'UTR    | G/G | 8.88E-16 | 5   | 12 | 39 | 99 | 0/0 | 0/0 | 0/0 | match | match | match |
| 163383 | TruSeqV2    | 6:46620437 | 5'UTR    | G/G | 4.44E-16 | 141 | 99 | 31 | 84 | 0/0 | 0/0 | 0/0 | match | match | match |
| 198564 | Agilent38MB | 6:46620437 | 5'UTR    | G/G | 4.44E-16 | 5   | 9  | 37 | 99 | 0/0 | 0/0 | 0/0 | match | match | match |
| 132306 | Agilent38MB | 6:46626353 | intronic | A/A | 1.54E-09 | 2   | 6  | 32 | 87 | 0/0 | 0/0 | 0/0 | match | match | match |
| 108971 | TruSeqV2    | 6:52615226 | 3'UTR    | A/A | 8.88E-16 | 105 | 99 | 43 | 99 | 0/0 | 0/0 | 0/0 | match | match | match |
| 115239 | TruSeqV2    | 6:52615226 | 3'UTR    | A/A | 4.44E-16 | 58  | 99 | 39 | 99 | 0/0 | 0/0 | 0/0 | match | match | match |
| 132306 | Agilent38MB | 6:52615226 | 3'UTR    | A/A | 6.66E-16 | 3   | 9  | 29 | 81 | 0/0 | 0/0 | 0/0 | match | match | match |
| 163383 | TruSeqV2    | 6:52615226 | 3'UTR    | A/A | 4.44E-16 | 102 | 99 | 36 | 99 | 0/0 | 0/0 | 0/0 | match | match | match |
| 198564 | Agilent38MB | 6:52615226 | 3'UTR    | A/A | 8.88E-16 | 3   | 9  | 53 | 99 | 0/0 | 0/0 | 0/0 | match | match | match |

|        |             |            |          |     |          |      |    |    |    |     |     |     |       |       |       |
|--------|-------------|------------|----------|-----|----------|------|----|----|----|-----|-----|-----|-------|-------|-------|
| 108971 | TruSeqV2    | 6:52615353 | 3'UTR    | C/C | 1.95E-14 | 75   | 99 | 70 | 99 | 0/0 | 0/0 | 0/0 | match | match | match |
| 115239 | TruSeqV2    | 6:52615353 | 3'UTR    | C/C | 2.00E-15 | 41   | 99 | 48 | 99 | 0/0 | 0/0 | 0/0 | match | match | match |
| 132306 | Agilent38MB | 6:52615353 | 3'UTR    | C/C | 1.11E-15 | 105  | 99 | 49 | 99 | 0/0 | 0/0 | 0/0 | match | match | match |
| 163383 | TruSeqV2    | 6:52615353 | 3'UTR    | C/C | 6.66E-16 | 57   | 99 | 48 | 99 | 0/0 | 0/0 | 0/0 | match | match | match |
| 198564 | Agilent38MB | 6:52615353 | 3'UTR    | C/C | 1.31E-14 | 156  | 99 | 47 | 99 | 0/0 | 0/0 | 0/0 | match | match | match |
| 108971 | TruSeqV2    | 6:52615415 | missense | T/T | 7.55E-15 | 42   | 96 | 57 | 99 | 0/0 | 0/0 | 0/0 | match | match | match |
| 115239 | TruSeqV2    | 6:52615415 | missense | T/T | 1.55E-15 | 28   | 72 | 42 | 99 | 0/0 | 0/0 | 0/0 | match | match | match |
| 132306 | Agilent38MB | 6:52615415 | missense | T/T | 4.64E-14 | 83   | 99 | 37 | 99 | 0/0 | 0/0 | 0/0 | match | match | match |
| 163383 | TruSeqV2    | 6:52615415 | missense | T/T | 2.89E-15 | 44   | 99 | 31 | 84 | 0/0 | 0/0 | 0/0 | match | match | match |
| 198564 | Agilent38MB | 6:52615415 | missense | T/T | 1.78E-15 | 145  | 99 | 39 | 99 | 0/0 | 0/0 | 0/0 | match | match | match |
| 108971 | TruSeqV2    | 6:52617664 | synon    | A/A | 4.44E-15 | 71   | 99 | 44 | 99 | 0/0 | 0/0 | 0/0 | match | match | match |
| 115239 | TruSeqV2    | 6:52617664 | synon    | A/A | 6.66E-16 | 44   | 99 | 34 | 78 | 0/0 | 0/0 | 0/0 | match | match | match |
| 132306 | Agilent38MB | 6:52617664 | synon    | A/A | 4.44E-16 | 637  | 99 | 41 | 99 | 0/0 | 0/0 | 0/0 | match | match | match |
| 163383 | TruSeqV2    | 6:52617664 | synon    | A/A | 1.11E-15 | 50   | 99 | 55 | 99 | 0/0 | 0/0 | 0/0 | match | match | match |
| 198564 | Agilent38MB | 6:52617664 | synon    | A/A | 8.88E-16 | 1082 | 99 | 36 | 84 | 0/0 | 0/0 | 0/0 | match | match | match |
| 108971 | TruSeqV2    | 6:52617731 | missense | G/C | 8.88E-16 | 83   | 99 | 43 | 99 | 0/1 | 0/1 | 0/1 | match | match | match |
| 115239 | TruSeqV2    | 6:52617731 | missense | G/C | 6.66E-16 | 57   | 99 | 45 | 99 | 0/1 | 0/1 | 0/1 | match | match | match |
| 132306 | Agilent38MB | 6:52617731 | missense | G/G | 2.00E-15 | 308  | 99 | 34 | 99 | 1/1 | 1/1 | 1/1 | match | match | match |
| 163383 | TruSeqV2    | 6:52617731 | missense | G/G | 1.11E-15 | 64   | 99 | 37 | 99 | 1/1 | 1/1 | 1/1 | match | match | match |
| 198564 | Agilent38MB | 6:52617731 | missense | G/C | 1.33E-15 | 590  | 99 | 40 | 99 | 0/1 | 0/1 | 0/1 | match | match | match |
| 108971 | TruSeqV2    | 6:52617738 | missense | G/G | 1.78E-15 | 74   | 99 | 39 | 99 | 0/0 | 0/0 | 0/0 | match | match | match |
| 115239 | TruSeqV2    | 6:52617738 | missense | G/G | 4.44E-16 | 60   | 99 | 50 | 99 | 0/0 | 0/0 | 0/0 | match | match | match |
| 132306 | Agilent38MB | 6:52617738 | missense | G/G | 8.88E-16 | 284  | 99 | 37 | 96 | 0/0 | 0/0 | 0/0 | match | match | match |
| 163383 | TruSeqV2    | 6:52617738 | missense | G/G | 2.66E-15 | 65   | 99 | 41 | 99 | 0/0 | 0/0 | 0/0 | match | match | match |
| 198564 | Agilent38MB | 6:52617738 | missense | G/G | 4.44E-16 | 511  | 99 | 40 | 99 | 0/0 | 0/0 | 0/0 | match | match | match |
| 108971 | TruSeqV2    | 6:52622755 | 5'UTR    | C/C | 4.44E-16 | 84   | 99 | 46 | 99 | 0/0 | 0/0 | 0/0 | match | match | match |
| 115239 | TruSeqV2    | 6:52622755 | 5'UTR    | C/C | 2.22E-16 | 66   | 99 | 49 | 99 | 0/0 | 0/0 | 0/0 | match | match | match |
| 132306 | Agilent38MB | 6:52622755 | 5'UTR    | C/C | 1.78E-15 | 68   | 99 | 34 | 99 | 0/0 | 0/0 | 0/0 | match | match | match |
| 163383 | TruSeqV2    | 6:52622755 | 5'UTR    | C/C | 2.22E-16 | 71   | 99 | 35 | 99 | 0/0 | 0/0 | 0/0 | match | match | match |
| 198564 | Agilent38MB | 6:52622755 | 5'UTR    | C/C | 4.44E-16 | 117  | 99 | 50 | 99 | 0/0 | 0/0 | 0/0 | match | match | match |
| 108971 | TruSeqV2    | 6:52657681 | synon    | A/A | 2.22E-15 | 146  | 99 | 35 | 93 | 0/0 | 0/0 | 0/0 | match | match | match |
| 115239 | TruSeqV2    | 6:52657681 | synon    | A/A | 6.66E-16 | 96   | 99 | 40 | 99 | 0/0 | 0/0 | 0/0 | match | match | match |
| 132306 | Agilent38MB | 6:52657681 | synon    | A/A | 4.44E-15 | 286  | 99 | 33 | 84 | 0/0 | 0/0 | 0/0 | match | match | match |
| 163383 | TruSeqV2    | 6:52657681 | synon    | A/A | 2.66E-15 | 114  | 99 | 40 | 99 | 0/0 | 0/0 | 0/0 | match | match | match |
| 198564 | Agilent38MB | 6:52657681 | synon    | A/A | 3.33E-15 | 558  | 99 | 31 | 81 | 0/0 | 0/0 | 0/0 | match | match | match |
| 108971 | TruSeqV2    | 6:52657684 | synon    | G/G | 4.44E-16 | 147  | 99 | 35 | 90 | 0/0 | 0/0 | 0/0 | match | match | match |
| 115239 | TruSeqV2    | 6:52657684 | synon    | G/G | 6.66E-16 | 99   | 99 | 41 | 99 | 0/0 | 0/0 | 0/0 | match | match | match |
| 132306 | Agilent38MB | 6:52657684 | synon    | G/G | 8.88E-16 | 291  | 99 | 31 | 90 | 0/0 | 0/0 | 0/0 | match | match | match |

|        |             |            |          |     |          |     |    |    |    |     |     |     |       |       |       |
|--------|-------------|------------|----------|-----|----------|-----|----|----|----|-----|-----|-----|-------|-------|-------|
| 163383 | TruSeqV2    | 6:52657684 | synon    | G/G | 6.66E-16 | 114 | 99 | 40 | 99 | 0/0 | 0/0 | 0/0 | match | match | match |
| 198564 | Agilent38MB | 6:52657684 | synon    | G/G | 6.66E-16 | 554 | 99 | 28 | 81 | 0/0 | 0/0 | 0/0 | match | match | match |
| 108971 | TruSeqV2    | 6:52657696 | synon    | C/C | 1.33E-15 | 148 | 99 | 29 | 81 | 0/0 | 0/0 | 0/0 | match | match | match |
| 115239 | TruSeqV2    | 6:52657696 | synon    | C/C | 6.66E-16 | 108 | 99 | 41 | 98 | 0/0 | 0/0 | 0/0 | match | match | match |
| 132306 | Agilent38MB | 6:52657696 | synon    | C/C | 8.22E-15 | 280 | 99 | 31 | 74 | 0/0 | 0/0 | 0/0 | match | match | match |
| 163383 | TruSeqV2    | 6:52657696 | synon    | C/C | 2.00E-15 | 113 | 99 | 40 | 99 | 0/0 | 0/0 | 0/0 | match | match | match |
| 198564 | Agilent38MB | 6:52657696 | synon    | C/C | 2.22E-15 | 551 | 99 | 30 | 78 | 0/0 | 0/0 | 0/0 | match | match | match |
| 108971 | TruSeqV2    | 6:52657699 | synon    | G/G | 2.22E-15 | 150 | 99 | 31 | 81 | 0/0 | 0/0 | 0/0 | match | match | match |
| 115239 | TruSeqV2    | 6:52657699 | synon    | G/G | 6.66E-16 | 107 | 99 | 40 | 93 | 0/0 | 0/0 | 0/0 | match | match | match |
| 132306 | Agilent38MB | 6:52657699 | synon    | G/G | 6.66E-15 | 277 | 99 | 32 | 84 | 0/0 | 0/0 | 0/0 | match | match | match |
| 163383 | TruSeqV2    | 6:52657699 | synon    | G/G | 2.00E-15 | 113 | 99 | 42 | 99 | 0/0 | 0/0 | 0/0 | match | match | match |
| 198564 | Agilent38MB | 6:52657699 | synon    | G/G | 1.78E-15 | 551 | 99 | 31 | 78 | 0/0 | 0/0 | 0/0 | match | match | match |
| 108971 | TruSeqV2    | 6:52658955 | missense | T/T | 3.77E-15 | 97  | 99 | 50 | 99 | 0/0 | 0/0 | 0/0 | match | match | match |
| 115239 | TruSeqV2    | 6:52658955 | missense | T/T | 4.44E-16 | 43  | 99 | 44 | 99 | 0/0 | 0/0 | 0/0 | match | match | match |
| 132306 | Agilent38MB | 6:52658955 | missense | T/T | 5.11E-15 | 493 | 99 | 52 | 99 | 0/0 | 0/0 | 0/0 | match | match | match |
| 163383 | TruSeqV2    | 6:52658955 | missense | T/T | 4.44E-16 | 79  | 99 | 41 | 99 | 0/0 | 0/0 | 0/0 | match | match | match |
| 198564 | Agilent38MB | 6:52658955 | missense | T/T | 8.88E-16 | 891 | 99 | 41 | 99 | 0/0 | 0/0 | 0/0 | match | match | match |
| 108971 | TruSeqV2    | 6:52658988 | missense | T/T | 8.88E-16 | 94  | 99 | 46 | 99 | 0/0 | 0/0 | 0/0 | match | match | match |
| 115239 | TruSeqV2    | 6:52658988 | missense | T/T | 8.88E-16 | 43  | 99 | 40 | 99 | 0/0 | 0/0 | 0/0 | match | match | match |
| 132306 | Agilent38MB | 6:52658988 | missense | T/T | 6.66E-16 | 350 | 99 | 44 | 99 | 0/0 | 0/0 | 0/0 | match | match | match |
| 163383 | TruSeqV2    | 6:52658988 | missense | T/T | 6.66E-16 | 79  | 99 | 34 | 82 | 0/0 | 0/0 | 0/0 | match | match | match |
| 198564 | Agilent38MB | 6:52658988 | missense | T/T | 4.44E-16 | 606 | 99 | 37 | 96 | 0/0 | 0/0 | 0/0 | match | match | match |
| 108971 | TruSeqV2    | 6:52658999 | missense | G/G | 1.33E-15 | 95  | 99 | 47 | 99 | 0/0 | 0/0 | 0/0 | match | match | match |
| 115239 | TruSeqV2    | 6:52658999 | missense | G/G | 1.11E-15 | 46  | 99 | 45 | 99 | 0/0 | 0/0 | 0/0 | match | match | match |
| 132306 | Agilent38MB | 6:52658999 | missense | G/G | 6.66E-16 | 313 | 99 | 39 | 96 | 0/0 | 0/0 | 0/0 | match | match | match |
| 163383 | TruSeqV2    | 6:52658999 | missense | G/G | 2.66E-15 | 75  | 99 | 37 | 99 | 0/0 | 0/0 | 0/0 | match | match | match |
| 198564 | Agilent38MB | 6:52658999 | missense | G/G | 8.88E-16 | 510 | 99 | 35 | 96 | 0/0 | 0/0 | 0/0 | match | match | match |
| 108971 | TruSeqV2    | 6:52659002 | missense | C/C | 6.66E-16 | 95  | 99 | 47 | 99 | 0/0 | 0/0 | 0/0 | match | match | match |
| 115239 | TruSeqV2    | 6:52659002 | missense | C/C | 1.09E-11 | 47  | 99 | 44 | 99 | 0/0 | 0/0 | 0/0 | match | match | match |
| 132306 | Agilent38MB | 6:52659002 | missense | C/C | 4.44E-16 | 300 | 99 | 36 | 96 | 0/0 | 0/0 | 0/0 | match | match | match |
| 163383 | TruSeqV2    | 6:52659002 | missense | C/C | 4.44E-16 | 80  | 99 | 37 | 99 | 0/0 | 0/0 | 0/0 | match | match | match |
| 198564 | Agilent38MB | 6:52659002 | missense | C/C | 4.44E-16 | 485 | 99 | 35 | 96 | 0/0 | 0/0 | 0/0 | match | match | match |
| 108971 | TruSeqV2    | 6:52664031 | missense | G/G | 1.62E-14 | 100 | 99 | 50 | 99 | 0/0 | 0/0 | 0/0 | match | match | match |
| 115239 | TruSeqV2    | 6:52664031 | missense | G/G | 6.66E-16 | 65  | 99 | 44 | 99 | 0/0 | 0/0 | 0/0 | match | match | match |
| 132306 | Agilent38MB | 6:52664031 | missense | G/G | 2.22E-16 | 161 | 99 | 48 | 99 | 0/0 | 0/0 | 0/0 | match | match | match |
| 163383 | TruSeqV2    | 6:52664031 | missense | G/G | 4.44E-16 | 99  | 99 | 34 | 93 | 0/0 | 0/0 | 0/0 | match | match | match |
| 198564 | Agilent38MB | 6:52664031 | missense | G/G | 4.44E-16 | 266 | 99 | 52 | 99 | 0/0 | 0/0 | 0/0 | match | match | match |
| 108971 | TruSeqV2    | 6:52664032 | missense | C/C | 4.44E-16 | 99  | 99 | 50 | 99 | 0/0 | 0/0 | 0/0 | match | match | match |

|        |             |            |          |     |          |     |    |    |    |     |     |     |       |       |       |
|--------|-------------|------------|----------|-----|----------|-----|----|----|----|-----|-----|-----|-------|-------|-------|
| 115239 | TruSeqV2    | 6:52664032 | missense | C/C | 2.22E-16 | 66  | 99 | 43 | 99 | 0/0 | 0/0 | 0/0 | match | match | match |
| 132306 | Agilent38MB | 6:52664032 | missense | C/C | 2.22E-16 | 149 | 99 | 49 | 99 | 0/0 | 0/0 | 0/0 | match | match | match |
| 163383 | TruSeqV2    | 6:52664032 | missense | C/C | 2.22E-16 | 98  | 99 | 35 | 96 | 0/0 | 0/0 | 0/0 | match | match | match |
| 198564 | Agilent38MB | 6:52664032 | missense | C/C | 1.55E-15 | 258 | 99 | 52 | 99 | 0/0 | 0/0 | 0/0 | match | match | match |
| 108971 | TruSeqV2    | 6:52698964 | missense | T/T | 3.77E-15 | 64  | 99 | 56 | 99 | 0/0 | 0/0 | 0/0 | match | match | match |
| 115239 | TruSeqV2    | 6:52698964 | missense | T/T | 2.22E-15 | 46  | 99 | 41 | 99 | 0/0 | 0/0 | 0/0 | match | match | match |
| 132306 | Agilent38MB | 6:52698964 | missense | T/T | 1.55E-15 | 495 | 99 | 34 | 83 | 0/0 | 0/0 | 0/0 | match | match | match |
| 163383 | TruSeqV2    | 6:52698964 | missense | T/T | 1.55E-15 | 70  | 99 | 51 | 99 | 0/0 | 0/0 | 0/0 | match | match | match |
| 198564 | Agilent38MB | 6:52698964 | missense | T/T | 2.22E-16 | 998 | 99 | 40 | 99 | 0/0 | 0/0 | 0/0 | match | match | match |
| 108971 | TruSeqV2    | 6:52699081 | splice   | C/C | 4.44E-16 | 40  | 99 | 56 | 99 | 0/0 | 0/0 | 0/0 | match | match | match |
| 115239 | TruSeqV2    | 6:52699081 | splice   | C/C | 8.88E-16 | 27  | 66 | 45 | 99 | 0/0 | 0/0 | 0/0 | match | match | match |
| 132306 | Agilent38MB | 6:52699081 | splice   | C/C | 4.44E-16 | 118 | 99 | 41 | 99 | 0/0 | 0/0 | 0/0 | match | match | match |
| 163383 | TruSeqV2    | 6:52699081 | splice   | C/C | 6.66E-16 | 39  | 99 | 53 | 99 | 0/0 | 0/0 | 0/0 | match | match | match |
| 198564 | Agilent38MB | 6:52699081 | splice   | C/C | 6.66E-16 | 193 | 99 | 48 | 99 | 0/0 | 0/0 | 0/0 | match | match | match |
| 108971 | TruSeqV2    | 6:52701143 | missense | T/T | 8.88E-16 | 119 | 99 | 23 | 69 | 1/1 | 1/1 | 1/1 | match | match | match |
| 115239 | TruSeqV2    | 6:52701143 | missense | T/T | 4.44E-15 | 94  | 99 | 36 | 99 | 1/1 | 1/1 | 1/1 | match | match | match |
| 132306 | Agilent38MB | 6:52701143 | missense | T/T | 3.77E-15 | 160 | 99 | 42 | 99 | 1/1 | 1/1 | 1/1 | match | match | match |
| 163383 | TruSeqV2    | 6:52701143 | missense | T/T | 8.88E-16 | 125 | 99 | 34 | 99 | 1/1 | 1/1 | 1/1 | match | match | match |
| 198564 | Agilent38MB | 6:52701143 | missense | T/T | 1.09E-14 | 318 | 99 | 46 | 99 | 1/1 | 1/1 | 1/1 | match | match | match |
| 198564 | Agilent38MB | 6:52709117 | intronic | G/G | 6.66E-16 | 2   | 6  | 59 | 99 | 0/0 | 0/0 | 0/0 | match | match | match |
| 108971 | TruSeqV2    | 6:52714137 | promoter | C/C | 4.44E-16 | 1   | 3  | 47 | 99 | 0/0 | 0/0 | 0/0 | match | match | match |
| 115239 | TruSeqV2    | 6:52714137 | promoter | C/C | 8.88E-16 | 1   | 3  | 20 | 48 | 0/0 | 0/0 | 0/0 | match | match | match |
| 132306 | Agilent38MB | 6:52714137 | promoter | C/C | 4.44E-16 | 2   | 6  | 40 | 99 | 0/0 | 0/0 | 0/0 | match | match | match |
| 163383 | TruSeqV2    | 6:52714137 | promoter | C/C | 2.22E-16 | 3   | 9  | 41 | 99 | 0/0 | 0/0 | 0/0 | match | match | match |
| 198564 | Agilent38MB | 6:52714137 | promoter | C/C | 4.44E-16 | 1   | 3  | 36 | 99 | 0/0 | 0/0 | 0/0 | match | match | match |
| 108971 | TruSeqV2    | 6:52764744 | fs       | C/C | 1.33E-15 | 73  | 99 | 37 | 99 | 0/0 | 0/0 | 0/0 | match | match | match |
| 115239 | TruSeqV2    | 6:52764744 | fs       | C/C | 2.66E-15 | 73  | 99 | 37 | 99 | 0/0 | 0/0 | 0/0 | match | match | match |
| 132306 | Agilent38MB | 6:52764744 | fs       | C/C | 4.44E-15 | 73  | 99 | 37 | 99 | 0/0 | 0/0 | 0/0 | match | match | match |
| 163383 | TruSeqV2    | 6:52764744 | fs       | C/C | 2.22E-15 | 73  | 99 | 37 | 99 | 0/0 | 0/0 | 0/0 | match | match | match |
| 198564 | Agilent38MB | 6:52764744 | fs       | C/C | 2.22E-15 | 73  | 99 | 37 | 99 | 0/0 | 0/0 | 0/0 | match | match | match |
| 108971 | TruSeqV2    | 6:52766983 | intronic | T/T | 3.11E-15 | 17  | 48 | 44 | 99 | 0/0 | 0/0 | 0/0 | match | match | match |
| 115239 | TruSeqV2    | 6:52766983 | intronic | T/C | 4.44E-16 | 15  | 99 | 37 | 99 | 0/1 | 0/1 | 0/1 | match | match | match |
| 132306 | Agilent38MB | 6:52766983 | intronic | T/T | 2.22E-15 | 9   | 24 | 33 | 93 | 0/0 | 0/0 | 0/0 | match | match | match |
| 163383 | TruSeqV2    | 6:52766983 | intronic | T/C | 8.88E-16 | 26  | 99 | 39 | 99 | 0/1 | 0/1 | 0/1 | match | match | match |
| 198564 | Agilent38MB | 6:52766983 | intronic | T/T | 1.78E-15 | 22  | 66 | 41 | 99 | 0/0 | 0/0 | 0/0 | match | match | match |
| 108971 | TruSeqV2    | 6:52767028 | intronic | G/G | 4.44E-16 | 28  | 81 | 42 | 99 | 0/0 | 0/0 | 0/0 | match | match | match |
| 115239 | TruSeqV2    | 6:52767028 | intronic | G/G | 4.44E-16 | 29  | 84 | 39 | 99 | 0/0 | 0/0 | 0/0 | match | match | match |
| 132306 | Agilent38MB | 6:52767028 | intronic | G/G | 4.44E-16 | 38  | 99 | 30 | 87 | 0/0 | 0/0 | 0/0 | match | match | match |

|        |             |            |          |     |          |     |    |    |    |     |     |     |       |       |       |
|--------|-------------|------------|----------|-----|----------|-----|----|----|----|-----|-----|-----|-------|-------|-------|
| 163383 | TruSeqV2    | 6:52767028 | intronic | G/G | 8.88E-16 | 39  | 99 | 40 | 96 | 0/0 | 0/0 | 0/0 | match | match | match |
| 198564 | Agilent38MB | 6:52767028 | intronic | G/G | 1.11E-15 | 61  | 99 | 42 | 99 | 0/0 | 0/0 | 0/0 | match | match | match |
| 108971 | TruSeqV2    | 6:52767205 | missense | T/T | 7.80E-11 | 160 | 99 | 46 | 99 | 0/0 | 0/0 | 0/0 | match | match | match |
| 115239 | TruSeqV2    | 6:52767205 | missense | T/T | 2.10E-11 | 122 | 99 | 41 | 99 | 0/0 | 0/0 | 0/0 | match | match | match |
| 132306 | Agilent38MB | 6:52767205 | missense | T/T | 6.83E-08 | 362 | 99 | 47 | 99 | 0/0 | 0/0 | 0/0 | match | match | match |
| 163383 | TruSeqV2    | 6:52767205 | missense | T/T | 2.32E-07 | 176 | 99 | 32 | 87 | 0/0 | 0/0 | 0/0 | match | match | match |
| 198564 | Agilent38MB | 6:52767205 | missense | T/T | 5.81E-08 | 634 | 99 | 44 | 99 | 0/0 | 0/0 | 0/0 | match | match | match |
| 108971 | TruSeqV2    | 6:52767227 | missense | C/C | 4.44E-16 | 164 | 99 | 49 | 99 | 0/0 | 0/0 | 0/0 | match | match | match |
| 115239 | TruSeqV2    | 6:52767227 | missense | C/C | 9.33E-15 | 119 | 99 | 44 | 99 | 0/0 | 0/0 | 0/0 | match | match | match |
| 132306 | Agilent38MB | 6:52767227 | missense | C/C | 8.88E-16 | 283 | 99 | 48 | 99 | 0/0 | 0/0 | 0/0 | match | match | match |
| 163383 | TruSeqV2    | 6:52767227 | missense | C/C | 3.33E-15 | 172 | 99 | 33 | 93 | 0/0 | 0/0 | 0/0 | match | match | match |
| 198564 | Agilent38MB | 6:52767227 | missense | C/C | 4.44E-15 | 517 | 99 | 45 | 99 | 0/0 | 0/0 | 0/0 | match | match | match |
| 108971 | TruSeqV2    | 6:52770596 | missense | G/G | 2.22E-16 | 162 | 99 | 49 | 99 | 0/0 | 0/0 | 0/0 | match | match | match |
| 115239 | TruSeqV2    | 6:52770596 | missense | G/G | 2.22E-16 | 91  | 99 | 30 | 81 | 0/0 | 0/0 | 0/0 | match | match | match |
| 132306 | Agilent38MB | 6:52770596 | missense | G/G | 2.22E-16 | 141 | 99 | 40 | 99 | 0/0 | 0/0 | 0/0 | match | match | match |
| 163383 | TruSeqV2    | 6:52770596 | missense | G/G | 2.22E-16 | 156 | 99 | 36 | 81 | 0/0 | 0/0 | 0/0 | match | match | match |
| 198564 | Agilent38MB | 6:52770596 | missense | G/G | 1.78E-15 | 200 | 99 | 29 | 72 | 0/0 | 0/0 | 0/0 | match | match | match |
| 108971 | TruSeqV2    | 6:52774462 | 5'UTR    | C/C | 3.65E-12 | 240 | 99 | 61 | 99 | 0/0 | 0/0 | 0/0 | match | match | match |
| 115239 | TruSeqV2    | 6:52774462 | 5'UTR    | C/C | 4.44E-15 | 162 | 99 | 37 | 99 | 0/0 | 0/0 | 0/0 | match | match | match |
| 132306 | Agilent38MB | 6:52774462 | 5'UTR    | C/C | 1.11E-14 | 1   | 3  | 28 | 75 | 0/0 | 0/0 | 0/0 | match | match | match |
| 163383 | TruSeqV2    | 6:52774462 | 5'UTR    | C/C | 3.35E-14 | 184 | 99 | 45 | 99 | 0/0 | 0/0 | 0/0 | match | match | match |
| 198564 | Agilent38MB | 6:52774462 | 5'UTR    | C/C | 5.80E-14 | 2   | 6  | 44 | 99 | 0/0 | 0/0 | 0/0 | match | match | match |
| 108971 | TruSeqV2    | 6:52842781 | 3'UTR    | T/C | 5.11E-15 | 80  | 99 | 52 | 99 | 0/1 | 0/1 | 0/1 | match | match | match |
| 115239 | TruSeqV2    | 6:52842781 | 3'UTR    | T/C | 1.33E-15 | 36  | 99 | 55 | 99 | 0/1 | 0/1 | 0/1 | match | match | match |
| 163383 | TruSeqV2    | 6:52842781 | 3'UTR    | C/C | 1.22E-14 | 69  | 99 | 55 | 99 | 1/1 | 1/1 | 1/1 | match | match | match |
| 108971 | TruSeqV2    | 6:52842839 | 3'UTR    | C/C | 1.78E-15 | 122 | 99 | 54 | 99 | 0/0 | 0/0 | 0/0 | match | match | match |
| 115239 | TruSeqV2    | 6:52842839 | 3'UTR    | T/C | 1.55E-15 | 56  | 99 | 44 | 99 | 0/1 | 0/1 | 0/1 | match | match | match |
| 163383 | TruSeqV2    | 6:52842839 | 3'UTR    | C/C | 6.66E-16 | 108 | 99 | 46 | 99 | 0/0 | 0/0 | 0/0 | match | match | match |
| 108971 | TruSeqV2    | 6:52843131 | 3'UTR    | T/T | 2.89E-15 | 107 | 99 | 45 | 99 | 1/1 | 1/1 | 1/1 | match | match | match |
| 115239 | TruSeqV2    | 6:52843131 | 3'UTR    | T/G | 1.08E-13 | 74  | 99 | 46 | 99 | 0/1 | 0/1 | 0/1 | match | match | match |
| 132306 | Agilent38MB | 6:52843131 | 3'UTR    | T/G | 3.77E-15 | 17  | 99 | 36 | 99 | 0/1 | 0/1 | 0/1 | match | match | match |
| 163383 | TruSeqV2    | 6:52843131 | 3'UTR    | T/T | 5.77E-15 | 117 | 99 | 54 | 99 | 1/1 | 1/1 | 1/1 | match | match | match |
| 198564 | Agilent38MB | 6:52843131 | 3'UTR    | T/G | 3.22E-14 | 27  | 99 | 55 | 99 | 0/1 | 0/1 | 0/1 | match | match | match |
| 108971 | TruSeqV2    | 6:52847431 | missense | T/T | 4.44E-16 | 70  | 99 | 40 | 99 | 0/0 | 0/0 | 0/0 | match | match | match |
| 115239 | TruSeqV2    | 6:52847431 | missense | T/T | 2.22E-16 | 53  | 99 | 53 | 99 | 0/0 | 0/0 | 0/0 | match | match | match |
| 132306 | Agilent38MB | 6:52847431 | missense | T/T | 4.44E-16 | 93  | 99 | 37 | 99 | 0/0 | 0/0 | 0/0 | match | match | match |
| 163383 | TruSeqV2    | 6:52847431 | missense | T/T | 4.44E-16 | 79  | 99 | 33 | 93 | 0/0 | 0/0 | 0/0 | match | match | match |
| 198564 | Agilent38MB | 6:52847431 | missense | T/T | 2.73E-14 | 175 | 99 | 43 | 99 | 0/0 | 0/0 | 0/0 | match | match | match |

|        |             |             |          |     |          |     |    |    |    |     |     |     |       |       |       |
|--------|-------------|-------------|----------|-----|----------|-----|----|----|----|-----|-----|-----|-------|-------|-------|
| 108971 | TruSeqV2    | 6:52849325  | synon    | T/C | 2.20E-12 | 215 | 99 | 45 | 99 | 0/1 | 0/1 | 0/1 | match | match | match |
| 115239 | TruSeqV2    | 6:52849325  | synon    | C/C | 1.55E-15 | 176 | 99 | 50 | 99 | 0/0 | 0/0 | 0/0 | match | match | match |
| 132306 | Agilent38MB | 6:52849325  | synon    | C/C | 1.33E-15 | 154 | 99 | 46 | 99 | 0/0 | 0/0 | 0/0 | match | match | match |
| 163383 | TruSeqV2    | 6:52849325  | synon    | C/C | 2.44E-15 | 216 | 99 | 39 | 99 | 0/0 | 0/0 | 0/0 | match | match | match |
| 198564 | Agilent38MB | 6:52849325  | synon    | C/C | 5.33E-15 | 324 | 99 | 44 | 99 | 0/0 | 0/0 | 0/0 | match | match | match |
| 163383 | TruSeqV2    | 6:52860408  | promoter | T/T | 3.99E-12 | 1   | 3  | 37 | 96 | 0/0 | 0/0 | 0/0 | match | match | match |
| 108971 | TruSeqV2    | 7:122754358 | 3'UTR    | G/G | 2.66E-15 | 31  | 54 | 38 | 99 | 0/0 | 0/0 | 0/0 | match | match | match |
| 115239 | TruSeqV2    | 7:122754358 | 3'UTR    | G/A | 1.55E-15 | 24  | 99 | 35 | 99 | 0/1 | 0/1 | 0/1 | match | match | match |
| 163383 | TruSeqV2    | 7:122754358 | 3'UTR    | G/G | 2.89E-15 | 37  | 99 | 42 | 99 | 0/0 | 0/0 | 0/0 | match | match | match |
| 108971 | TruSeqV2    | 7:122755445 | 3'UTR    | G/G | 2.22E-16 | 151 | 99 | 46 | 99 | 1/1 | 1/1 | 1/1 | match | match | match |
| 115239 | TruSeqV2    | 7:122755445 | 3'UTR    | G/G | 2.22E-16 | 108 | 99 | 35 | 99 | 1/1 | 1/1 | 1/1 | match | match | match |
| 132306 | Agilent38MB | 7:122755445 | 3'UTR    | G/G | 8.88E-16 | 11  | 33 | 51 | 99 | 1/1 | 1/1 | 1/1 | match | match | match |
| 163383 | TruSeqV2    | 7:122755445 | 3'UTR    | G/G | 2.22E-16 | 154 | 99 | 29 | 85 | 1/1 | 1/1 | 1/1 | match | match | match |
| 198564 | Agilent38MB | 7:122755445 | 3'UTR    | G/G | 2.22E-16 | 16  | 48 | 48 | 99 | 1/1 | 1/1 | 1/1 | match | match | match |
| 108971 | TruSeqV2    | 7:122809234 | missense | T/C | 2.22E-16 | 127 | 99 | 37 | 99 | 0/1 | 0/1 | 0/1 | match | match | match |
| 115239 | TruSeqV2    | 7:122809234 | missense | T/C | 2.22E-16 | 71  | 99 | 38 | 99 | 0/1 | 0/1 | 0/1 | match | match | match |
| 132306 | Agilent38MB | 7:122809234 | missense | T/T | 1.33E-15 | 83  | 99 | 28 | 59 | 0/0 | 0/0 | 0/0 | match | match | match |
| 163383 | TruSeqV2    | 7:122809234 | missense | T/T | 4.44E-16 | 100 | 99 | 34 | 81 | 0/0 | 0/0 | 0/0 | match | match | match |
| 198564 | Agilent38MB | 7:122809234 | missense | T/T | 8.88E-16 | 190 | 99 | 38 | 99 | 0/0 | 0/0 | 0/0 | match | match | match |
| 108971 | TruSeqV2    | 7:122839925 | synon    | G/G | 6.66E-16 | 102 | 99 | 41 | 99 | 0/0 | 0/0 | 0/0 | match | match | match |
| 115239 | TruSeqV2    | 7:122839925 | synon    | G/G | 4.44E-16 | 58  | 99 | 30 | 78 | 0/0 | 0/0 | 0/0 | match | match | match |
| 132306 | Agilent38MB | 7:122839925 | synon    | G/G | 4.44E-16 | 158 | 99 | 31 | 84 | 0/0 | 0/0 | 0/0 | match | match | match |
| 163383 | TruSeqV2    | 7:122839925 | synon    | G/G | 4.44E-16 | 90  | 99 | 54 | 99 | 0/0 | 0/0 | 0/0 | match | match | match |
| 198564 | Agilent38MB | 7:122839925 | synon    | G/G | 2.22E-16 | 345 | 99 | 48 | 99 | 0/0 | 0/0 | 0/0 | match | match | match |
| 108971 | TruSeqV2    | 7:139572123 | missense | G/G | 2.22E-15 | 161 | 99 | 49 | 99 | 0/0 | 0/0 | 0/0 | match | match | match |
| 115239 | TruSeqV2    | 7:139572123 | missense | G/G | 1.55E-15 | 110 | 99 | 41 | 99 | 0/0 | 0/0 | 0/0 | match | match | match |
| 132306 | Agilent38MB | 7:139572123 | missense | G/G | 1.84E-14 | 179 | 99 | 44 | 99 | 0/0 | 0/0 | 0/0 | match | match | match |
| 163383 | TruSeqV2    | 7:139572123 | missense | G/G | 4.44E-16 | 116 | 99 | 52 | 99 | 0/0 | 0/0 | 0/0 | match | match | match |
| 198564 | Agilent38MB | 7:139572123 | missense | G/G | 6.66E-16 | 349 | 99 | 38 | 99 | 0/0 | 0/0 | 0/0 | match | match | match |
| 108971 | TruSeqV2    | 7:139636013 | synon    | G/G | 6.66E-15 | 133 | 99 | 34 | 93 | 0/0 | 0/0 | 0/0 | match | match | match |
| 115239 | TruSeqV2    | 7:139636013 | synon    | G/G | 6.66E-16 | 63  | 99 | 28 | 69 | 0/0 | 0/0 | 0/0 | match | match | match |
| 132306 | Agilent38MB | 7:139636013 | synon    | G/G | 1.11E-15 | 22  | 60 | 40 | 99 | 0/0 | 0/0 | 0/0 | match | match | match |
| 163383 | TruSeqV2    | 7:139636013 | synon    | G/G | 6.66E-16 | 100 | 99 | 35 | 85 | 0/0 | 0/0 | 0/0 | match | match | match |
| 198564 | Agilent38MB | 7:139636013 | synon    | G/G | 1.33E-15 | 64  | 99 | 42 | 99 | 0/0 | 0/0 | 0/0 | match | match | match |
| 108971 | TruSeqV2    | 7:139636026 | missense | G/G | 4.44E-16 | 144 | 99 | 37 | 99 | 0/0 | 0/0 | 0/0 | match | match | match |
| 115239 | TruSeqV2    | 7:139636026 | missense | G/G | 2.22E-16 | 75  | 99 | 29 | 68 | 0/0 | 0/0 | 0/0 | match | match | match |
| 132306 | Agilent38MB | 7:139636026 | missense | G/G | 2.00E-15 | 32  | 60 | 37 | 99 | 0/0 | 0/0 | 0/0 | match | match | match |
| 163383 | TruSeqV2    | 7:139636026 | missense | G/G | 4.44E-16 | 103 | 99 | 41 | 90 | 0/0 | 0/0 | 0/0 | match | match | match |

|        |             |             |          |     |          |     |    |    |    |     |     |     |       |       |       |
|--------|-------------|-------------|----------|-----|----------|-----|----|----|----|-----|-----|-----|-------|-------|-------|
| 198564 | Agilent38MB | 7:139636026 | missense | G/G | 4.44E-16 | 90  | 99 | 43 | 99 | 0/0 | 0/0 | 0/0 | match | match | match |
| 108971 | TruSeqV2    | 7:139653196 | missense | C/C | 1.55E-15 | 129 | 99 | 39 | 99 | 1/1 | 1/1 | 1/1 | match | match | match |
| 115239 | TruSeqV2    | 7:139653196 | missense | C/C | 1.29E-14 | 103 | 99 | 36 | 99 | 1/1 | 1/1 | 1/1 | match | match | match |
| 132306 | Agilent38MB | 7:139653196 | missense | C/C | 4.44E-16 | 94  | 99 | 29 | 86 | 1/1 | 1/1 | 1/1 | match | match | match |
| 163383 | TruSeqV2    | 7:139653196 | missense | C/C | 3.77E-15 | 119 | 99 | 41 | 99 | 1/1 | 1/1 | 1/1 | match | match | match |
| 198564 | Agilent38MB | 7:139653196 | missense | C/C | 2.01E-12 | 140 | 99 | 42 | 99 | 1/1 | 1/1 | 1/1 | match | match | match |
| 108971 | TruSeqV2    | 7:139653200 | missense | C/C | 1.55E-15 | 135 | 99 | 40 | 99 | 0/0 | 0/0 | 0/0 | match | match | match |
| 115239 | TruSeqV2    | 7:139653200 | missense | C/C | 6.66E-16 | 101 | 99 | 41 | 99 | 0/0 | 0/0 | 0/0 | match | match | match |
| 132306 | Agilent38MB | 7:139653200 | missense | C/C | 1.11E-15 | 99  | 99 | 31 | 87 | 0/0 | 0/0 | 0/0 | match | match | match |
| 163383 | TruSeqV2    | 7:139653200 | missense | C/C | 4.44E-16 | 125 | 99 | 44 | 99 | 0/0 | 0/0 | 0/0 | match | match | match |
| 198564 | Agilent38MB | 7:139653200 | missense | C/C | 4.00E-15 | 153 | 99 | 43 | 99 | 0/0 | 0/0 | 0/0 | match | match | match |
| 108971 | TruSeqV2    | 7:139655300 | synon    | C/C | 8.88E-16 | 120 | 99 | 48 | 99 | 0/0 | 0/0 | 0/0 | match | match | match |
| 115239 | TruSeqV2    | 7:139655300 | synon    | C/C | 4.44E-16 | 87  | 99 | 21 | 63 | 0/0 | 0/0 | 0/0 | match | match | match |
| 132306 | Agilent38MB | 7:139655300 | synon    | C/C | 2.66E-15 | 34  | 93 | 43 | 99 | 0/0 | 0/0 | 0/0 | match | match | match |
| 163383 | TruSeqV2    | 7:139655300 | synon    | C/C | 6.66E-16 | 90  | 99 | 39 | 99 | 0/0 | 0/0 | 0/0 | match | match | match |
| 198564 | Agilent38MB | 7:139655300 | synon    | C/C | 2.00E-15 | 48  | 99 | 57 | 99 | 0/0 | 0/0 | 0/0 | match | match | match |
| 108971 | TruSeqV2    | 7:139657478 | missense | A/A | 1.78E-15 | 279 | 99 | 40 | 99 | 0/0 | 0/0 | 0/0 | match | match | match |
| 115239 | TruSeqV2    | 7:139657478 | missense | A/A | 4.44E-16 | 164 | 99 | 27 | 66 | 0/0 | 0/0 | 0/0 | match | match | match |
| 132306 | Agilent38MB | 7:139657478 | missense | A/A | 2.22E-16 | 59  | 99 | 43 | 99 | 0/0 | 0/0 | 0/0 | match | match | match |
| 163383 | TruSeqV2    | 7:139657478 | missense | A/A | 4.44E-16 | 200 | 99 | 31 | 81 | 0/0 | 0/0 | 0/0 | match | match | match |
| 198564 | Agilent38MB | 7:139657478 | missense | A/A | 6.66E-16 | 166 | 99 | 44 | 99 | 0/0 | 0/0 | 0/0 | match | match | match |
| 108971 | TruSeqV2    | 7:139657513 | missense | A/G | 8.03E-11 | 236 | 99 | 31 | 99 | 0/1 | 0/1 | 0/1 | match | match | match |
| 115239 | TruSeqV2    | 7:139657513 | missense | A/A | 5.11E-15 | 153 | 99 | 28 | 75 | 0/0 | 0/0 | 0/0 | match | match | match |
| 132306 | Agilent38MB | 7:139657513 | missense | A/A | 2.00E-15 | 59  | 99 | 31 | 75 | 0/0 | 0/0 | 0/0 | match | match | match |
| 163383 | TruSeqV2    | 7:139657513 | missense | A/A | 6.66E-16 | 194 | 99 | 32 | 87 | 0/0 | 0/0 | 0/0 | match | match | match |
| 198564 | Agilent38MB | 7:139657513 | missense | A/A | 3.77E-15 | 140 | 99 | 45 | 99 | 0/0 | 0/0 | 0/0 | match | match | match |
| 108971 | TruSeqV2    | 7:139657522 | missense | A/A | 6.67E-05 | 223 | 99 | 31 | 93 | 0/0 | 0/0 | 0/0 | match | match | match |
| 115239 | TruSeqV2    | 7:139657522 | missense | A/A | 4.00E-15 | 138 | 99 | 27 | 72 | 0/0 | 0/0 | 0/0 | match | match | match |
| 132306 | Agilent38MB | 7:139657522 | missense | A/A | 6.66E-16 | 64  | 99 | 27 | 72 | 0/0 | 0/0 | 0/0 | match | match | match |
| 163383 | TruSeqV2    | 7:139657522 | missense | A/A | 1.78E-15 | 180 | 99 | 33 | 81 | 0/0 | 0/0 | 0/0 | match | match | match |
| 198564 | Agilent38MB | 7:139657522 | missense | A/A | 4.44E-16 | 125 | 99 | 49 | 99 | 0/0 | 0/0 | 0/0 | match | match | match |
| 108971 | TruSeqV2    | 7:139661844 | missense | C/C | 4.44E-16 | 56  | 99 | 36 | 90 | 0/0 | 0/0 | 0/0 | match | match | match |
| 115239 | TruSeqV2    | 7:139661844 | missense | C/C | 4.44E-16 | 42  | 89 | 37 | 99 | 0/0 | 0/0 | 0/0 | match | match | match |
| 132306 | Agilent38MB | 7:139661844 | missense | C/C | 2.22E-16 | 71  | 99 | 35 | 93 | 0/0 | 0/0 | 0/0 | match | match | match |
| 163383 | TruSeqV2    | 7:139661844 | missense | C/C | 2.22E-16 | 46  | 99 | 33 | 87 | 0/0 | 0/0 | 0/0 | match | match | match |
| 198564 | Agilent38MB | 7:139661844 | missense | C/C | 8.88E-16 | 116 | 99 | 28 | 72 | 0/0 | 0/0 | 0/0 | match | match | match |
| 108971 | TruSeqV2    | 7:139661890 | missense | T/T | 2.22E-16 | 80  | 99 | 31 | 90 | 0/0 | 0/0 | 0/0 | match | match | match |
| 115239 | TruSeqV2    | 7:139661890 | missense | T/T | 4.44E-16 | 59  | 99 | 33 | 90 | 0/0 | 0/0 | 0/0 | match | match | match |

|        |             |             |          |     |          |     |    |    |    |     |     |     |       |       |       |
|--------|-------------|-------------|----------|-----|----------|-----|----|----|----|-----|-----|-----|-------|-------|-------|
| 132306 | Agilent38MB | 7:139661890 | missense | T/T | 1.33E-15 | 61  | 99 | 35 | 94 | 0/0 | 0/0 | 0/0 | match | match | match |
| 163383 | TruSeqV2    | 7:139661890 | missense | T/T | 2.22E-16 | 65  | 99 | 49 | 96 | 0/0 | 0/0 | 0/0 | match | match | match |
| 198564 | Agilent38MB | 7:139661890 | missense | T/T | 4.44E-16 | 111 | 99 | 36 | 87 | 0/0 | 0/0 | 0/0 | match | match | match |
| 108971 | TruSeqV2    | 7:139661964 | missense | C/C | 4.88E-15 | 51  | 99 | 34 | 90 | 0/0 | 0/0 | 0/0 | match | match | match |
| 115239 | TruSeqV2    | 7:139661964 | missense | C/C | 1.78E-15 | 44  | 99 | 25 | 0  | 0/0 | 0/0 | 0/0 | match | match | match |
| 132306 | Agilent38MB | 7:139661964 | missense | C/C | 2.22E-16 | 141 | 99 | 23 | 69 | 0/0 | 0/0 | 0/0 | match | match | match |
| 163383 | TruSeqV2    | 7:139661964 | missense | C/C | 2.22E-16 | 46  | 99 | 37 | 81 | 0/0 | 0/0 | 0/0 | match | match | match |
| 198564 | Agilent38MB | 7:139661964 | missense | C/C | 4.44E-16 | 264 | 99 | 39 | 99 | 0/0 | 0/0 | 0/0 | match | match | match |
| 108971 | TruSeqV2    | 7:139706915 | missense | G/G | 1.91E-13 | 105 | 99 | 40 | 99 | 0/0 | 0/0 | 0/0 | match | match | match |
| 115239 | TruSeqV2    | 7:139706915 | missense | G/G | 1.33E-15 | 54  | 99 | 15 | 39 | 0/0 | 0/0 | 0/0 | match | match | match |
| 132306 | Agilent38MB | 7:139706915 | missense | G/G | 1.78E-15 | 152 | 99 | 24 | 66 | 0/0 | 0/0 | 0/0 | match | match | match |
| 163383 | TruSeqV2    | 7:139706915 | missense | G/G | 6.66E-15 | 75  | 99 | 33 | 93 | 0/0 | 0/0 | 0/0 | match | match | match |
| 198564 | Agilent38MB | 7:139706915 | missense | G/G | 8.22E-15 | 293 | 99 | 34 | 99 | 0/0 | 0/0 | 0/0 | match | match | match |
| 108971 | TruSeqV2    | 7:139706922 | missense | G/G | 6.66E-16 | 107 | 99 | 39 | 96 | 0/0 | 0/0 | 0/0 | match | match | match |
| 115239 | TruSeqV2    | 7:139706922 | missense | G/G | 2.22E-16 | 54  | 99 | 15 | 30 | 0/0 | 0/0 | 0/0 | match | match | match |
| 132306 | Agilent38MB | 7:139706922 | missense | G/G | 4.44E-16 | 165 | 99 | 24 | 69 | 0/0 | 0/0 | 0/0 | match | match | match |
| 163383 | TruSeqV2    | 7:139706922 | missense | G/G | 1.11E-15 | 74  | 99 | 33 | 59 | 0/0 | 0/0 | 0/0 | match | match | match |
| 198564 | Agilent38MB | 7:139706922 | missense | G/G | 1.33E-15 | 293 | 99 | 37 | 96 | 0/0 | 0/0 | 0/0 | match | match | match |
| 108971 | TruSeqV2    | 7:139706959 | synon    | G/G | 6.66E-16 | 88  | 99 | 27 | 66 | 0/0 | 0/0 | 0/0 | match | match | match |
| 115239 | TruSeqV2    | 7:139706959 | synon    | G/G | 8.88E-16 | 46  | 99 | 17 | 48 | 0/0 | 0/0 | 0/0 | match | match | match |
| 132306 | Agilent38MB | 7:139706959 | synon    | G/G | 4.44E-16 | 132 | 99 | 25 | 66 | 0/0 | 0/0 | 0/0 | match | match | match |
| 163383 | TruSeqV2    | 7:139706959 | synon    | G/G | 6.66E-16 | 57  | 99 | 26 | 63 | 0/0 | 0/0 | 0/0 | match | match | match |
| 198564 | Agilent38MB | 7:139706959 | synon    | G/G | 6.66E-16 | 253 | 99 | 33 | 90 | 0/0 | 0/0 | 0/0 | match | match | match |
| 108971 | TruSeqV2    | 7:139715542 | missense | C/C | 4.97E-14 | 64  | 99 | 29 | 81 | 0/0 | 0/0 | 0/0 | match | match | match |
| 115239 | TruSeqV2    | 7:139715542 | missense | C/C | 6.66E-16 | 35  | 99 | 11 | 24 | 0/0 | 0/0 | 0/0 | match | match | match |
| 132306 | Agilent38MB | 7:139715542 | missense | C/C | 6.66E-16 | 77  | 99 | 28 | 75 | 0/0 | 0/0 | 0/0 | match | match | match |
| 163383 | TruSeqV2    | 7:139715542 | missense | C/C | 1.78E-15 | 41  | 99 | 39 | 99 | 0/0 | 0/0 | 0/0 | match | match | match |
| 198564 | Agilent38MB | 7:139715542 | missense | C/C | 5.57E-14 | 167 | 99 | 37 | 99 | 0/0 | 0/0 | 0/0 | match | match | match |
| 108971 | TruSeqV2    | 7:139715566 | missense | C/C | 3.61E-12 | 74  | 99 | 35 | 93 | 0/0 | 0/0 | 0/0 | match | match | match |
| 115239 | TruSeqV2    | 7:139715566 | missense | C/C | 2.22E-16 | 39  | 99 | 10 | 27 | 0/0 | 0/0 | 0/0 | match | match | match |
| 132306 | Agilent38MB | 7:139715566 | missense | C/C | 2.22E-16 | 71  | 99 | 23 | 57 | 0/0 | 0/0 | 0/0 | match | match | match |
| 163383 | TruSeqV2    | 7:139715566 | missense | C/C | 2.22E-16 | 52  | 99 | 39 | 97 | 0/0 | 0/0 | 0/0 | match | match | match |
| 198564 | Agilent38MB | 7:139715566 | missense | C/C | 9.55E-15 | 130 | 99 | 33 | 90 | 0/0 | 0/0 | 0/0 | match | match | match |
| 108971 | TruSeqV2    | 7:139715581 | missense | G/G | 1.50E-12 | 83  | 99 | 38 | 96 | 0/0 | 0/0 | 0/0 | match | match | match |
| 115239 | TruSeqV2    | 7:139715581 | missense | G/G | 2.22E-16 | 46  | 99 | 9  | 27 | 0/0 | 0/0 | 0/0 | match | match | match |
| 132306 | Agilent38MB | 7:139715581 | missense | G/G | 2.22E-16 | 63  | 99 | 26 | 72 | 0/0 | 0/0 | 0/0 | match | match | match |
| 163383 | TruSeqV2    | 7:139715581 | missense | G/G | 4.44E-16 | 65  | 99 | 40 | 99 | 0/0 | 0/0 | 0/0 | match | match | match |
| 198564 | Agilent38MB | 7:139715581 | missense | G/G | 6.79E-13 | 99  | 99 | 34 | 99 | 0/0 | 0/0 | 0/0 | match | match | match |



|        |             |             |          |     |          |     |    |    |    |     |     |     |       |       |       |
|--------|-------------|-------------|----------|-----|----------|-----|----|----|----|-----|-----|-----|-------|-------|-------|
| 108971 | TruSeqV2    | 7:139715598 | synon    | C/C | 2.22E-16 | 91  | 99 | 36 | 96 | 0/0 | 0/0 | 0/0 | match | match | match |
| 115239 | TruSeqV2    | 7:139715598 | synon    | C/C | 8.88E-16 | 58  | 99 | 14 | 36 | 0/0 | 0/0 | 0/0 | match | match | match |
| 132306 | Agilent38MB | 7:139715598 | synon    | C/C | 6.66E-16 | 66  | 99 | 26 | 69 | 0/0 | 0/0 | 0/0 | match | match | match |
| 163383 | TruSeqV2    | 7:139715598 | synon    | C/C | 1.11E-15 | 71  | 99 | 43 | 99 | 0/0 | 0/0 | 0/0 | match | match | match |
| 198564 | Agilent38MB | 7:139715598 | synon    | C/C | 2.22E-16 | 103 | 99 | 40 | 96 | 0/0 | 0/0 | 0/0 | match | match | match |
| 108971 | TruSeqV2    | 7:139715641 | missense | G/G | 4.66E-15 | 85  | 99 | 39 | 99 | 0/0 | 0/0 | 0/0 | match | match | match |
| 115239 | TruSeqV2    | 7:139715641 | missense | G/G | 2.73E-14 | 50  | 99 | 14 | 39 | 0/0 | 0/0 | 0/0 | match | match | match |
| 132306 | Agilent38MB | 7:139715641 | missense | G/G | 7.53E-14 | 79  | 99 | 32 | 87 | 0/0 | 0/0 | 0/0 | match | match | match |
| 163383 | TruSeqV2    | 7:139715641 | missense | A/G | 3.09E-14 | 71  | 99 | 38 | 99 | 0/1 | 0/1 | 0/1 | match | match | match |
| 198564 | Agilent38MB | 7:139715641 | missense | G/G | 6.53E-11 | 140 | 99 | 34 | 93 | 0/0 | 0/0 | 0/0 | match | match | match |
| 108971 | TruSeqV2    | 7:139715645 | missense | C/C | 8.44E-15 | 84  | 99 | 35 | 78 | 0/0 | 0/0 | 0/0 | match | match | match |
| 115239 | TruSeqV2    | 7:139715645 | missense | C/C | 1.55E-15 | 44  | 99 | 15 | 42 | 0/0 | 0/0 | 0/0 | match | match | match |
| 132306 | Agilent38MB | 7:139715645 | missense | C/C | 1.49E-14 | 81  | 99 | 32 | 90 | 0/0 | 0/0 | 0/0 | match | match | match |
| 163383 | TruSeqV2    | 7:139715645 | missense | C/C | 4.17E-12 | 72  | 99 | 42 | 99 | 0/0 | 0/0 | 0/0 | match | match | match |
| 198564 | Agilent38MB | 7:139715645 | missense | C/C | 4.44E-16 | 137 | 99 | 34 | 96 | 0/0 | 0/0 | 0/0 | match | match | match |
| 108971 | TruSeqV2    | 7:139717487 | synon    | C/C | 8.88E-16 | 28  | 78 | 27 | 75 | 0/0 | 0/0 | 0/0 | match | match | match |
| 115239 | TruSeqV2    | 7:139717487 | synon    | C/C | 4.44E-16 | 24  | 60 | 13 | 36 | 0/0 | 0/0 | 0/0 | match | match | match |
| 132306 | Agilent38MB | 7:139717487 | synon    | C/C | 2.22E-16 | 17  | 42 | 27 | 69 | 0/0 | 0/0 | 0/0 | match | match | match |
| 163383 | TruSeqV2    | 7:139717487 | synon    | C/C | 2.22E-16 | 13  | 39 | 28 | 57 | 0/0 | 0/0 | 0/0 | match | match | match |
| 198564 | Agilent38MB | 7:139717487 | synon    | C/C | 2.22E-16 | 26  | 60 | 44 | 99 | 0/0 | 0/0 | 0/0 | match | match | match |
| 108971 | TruSeqV2    | 7:139717500 | missense | G/G | 5.11E-15 | 31  | 87 | 32 | 95 | 0/0 | 0/0 | 0/0 | match | match | match |
| 115239 | TruSeqV2    | 7:139717500 | missense | G/G | 1.87E-14 | 28  | 78 | 16 | 45 | 0/0 | 0/0 | 0/0 | match | match | match |
| 132306 | Agilent38MB | 7:139717500 | missense | G/G | 1.33E-15 | 18  | 45 | 27 | 72 | 0/0 | 0/0 | 0/0 | match | match | match |
| 163383 | TruSeqV2    | 7:139717500 | missense | G/G | 8.66E-15 | 17  | 45 | 21 | 51 | 0/0 | 0/0 | 0/0 | match | match | match |
| 198564 | Agilent38MB | 7:139717500 | missense | G/G | 8.88E-16 | 28  | 70 | 40 | 99 | 0/0 | 0/0 | 0/0 | match | match | match |
| 108971 | TruSeqV2    | 7:139717608 | missense | G/G | 1.78E-15 | 41  | 99 | 43 | 99 | 0/0 | 0/0 | 0/0 | match | match | match |
| 115239 | TruSeqV2    | 7:139717608 | missense | G/G | 1.33E-15 | 33  | 87 | 16 | 45 | 0/0 | 0/0 | 0/0 | match | match | match |
| 132306 | Agilent38MB | 7:139717608 | missense | G/G | 8.88E-16 | 95  | 99 | 26 | 72 | 0/0 | 0/0 | 0/0 | match | match | match |
| 163383 | TruSeqV2    | 7:139717608 | missense | G/G | 1.20E-14 | 25  | 69 | 36 | 99 | 0/0 | 0/0 | 0/0 | match | match | match |
| 198564 | Agilent38MB | 7:139717608 | missense | G/G | 5.11E-15 | 150 | 99 | 30 | 87 | 0/0 | 0/0 | 0/0 | match | match | match |
| 108971 | TruSeqV2    | 7:139720020 | 3'UTR    | G/G | 2.22E-16 | 61  | 99 | 38 | 99 | 0/0 | 0/0 | 0/0 | match | match | match |
| 115239 | TruSeqV2    | 7:139720020 | 3'UTR    | G/G | 2.22E-16 | 52  | 99 | 39 | 99 | 0/0 | 0/0 | 0/0 | match | match | match |
| 132306 | Agilent38MB | 7:139720020 | 3'UTR    | G/G | 2.22E-16 | 4   | 12 | 53 | 99 | 0/0 | 0/0 | 0/0 | match | match | match |
| 163383 | TruSeqV2    | 7:139720020 | 3'UTR    | G/G | 2.22E-16 | 50  | 99 | 43 | 99 | 0/0 | 0/0 | 0/0 | match | match | match |
| 198564 | Agilent38MB | 7:139720020 | 3'UTR    | G/G | 2.22E-15 | 3   | 6  | 42 | 99 | 0/0 | 0/0 | 0/0 | match | match | match |
| 108971 | TruSeqV2    | 7:150549427 | promoter | C/C | 4.44E-16 | 95  | 99 | 27 | 69 | 0/0 | 0/0 | 0/0 | match | match | match |
| 115239 | TruSeqV2    | 7:150549427 | promoter | C/C | 6.66E-16 | 60  | 99 | 21 | 54 | 0/0 | 0/0 | 0/0 | match | match | match |
| 132306 | Agilent38MB | 7:150549427 | promoter | C/C | 2.22E-16 | 1   | 3  | 34 | 84 | 0/0 | 0/0 | 0/0 | match | match | match |

|        |             |             |          |     |          |     |    |    |    |     |     |     |       |       |       |
|--------|-------------|-------------|----------|-----|----------|-----|----|----|----|-----|-----|-----|-------|-------|-------|
| 163383 | TruSeqV2    | 7:150549427 | promoter | C/C | 1.11E-15 | 80  | 99 | 33 | 87 | 0/0 | 0/0 | 0/0 | match | match | match |
| 108971 | TruSeqV2    | 7:150555915 | synon    | A/A | 9.33E-15 | 145 | 99 | 42 | 99 | 0/0 | 0/0 | 0/0 | match | match | match |
| 115239 | TruSeqV2    | 7:150555915 | synon    | A/G | 2.18E-14 | 83  | 99 | 12 | 99 | 0/1 | 0/1 | 0/1 | match | match | match |
| 132306 | Agilent38MB | 7:150555915 | synon    | A/G | 4.66E-15 | 120 | 99 | 40 | 99 | 0/1 | 0/1 | 0/1 | match | match | match |
| 163383 | TruSeqV2    | 7:150555915 | synon    | A/G | 5.33E-15 | 91  | 99 | 39 | 99 | 0/1 | 0/1 | 0/1 | match | match | match |
| 198564 | Agilent38MB | 7:150555915 | synon    | A/A | 5.77E-15 | 228 | 99 | 48 | 99 | 0/0 | 0/0 | 0/0 | match | match | match |
| 108971 | TruSeqV2    | 7:150556055 | missense | G/G | 4.44E-16 | 86  | 99 | 35 | 99 | 1/1 | 1/1 | 1/1 | match | match | match |
| 115239 | TruSeqV2    | 7:150556055 | missense | G/G | 2.22E-16 | 63  | 99 | 11 | 33 | 1/1 | 1/1 | 1/1 | match | match | match |
| 132306 | Agilent38MB | 7:150556055 | missense | G/G | 4.44E-16 | 17  | 51 | 28 | 90 | 1/1 | 1/1 | 1/1 | match | match | match |
| 163383 | TruSeqV2    | 7:150556055 | missense | G/G | 6.66E-16 | 77  | 99 | 28 | 87 | 1/1 | 1/1 | 1/1 | match | match | match |
| 198564 | Agilent38MB | 7:150556055 | missense | G/G | 8.88E-16 | 27  | 81 | 46 | 99 | 1/1 | 1/1 | 1/1 | match | match | match |
| 108971 | TruSeqV2    | 7:150556056 | synon    | C/C | 4.26E-14 | 87  | 99 | 35 | 99 | 1/1 | 1/1 | 1/1 | match | match | match |
| 115239 | TruSeqV2    | 7:150556056 | synon    | C/C | 9.99E-14 | 62  | 99 | 11 | 33 | 1/1 | 1/1 | 1/1 | match | match | match |
| 132306 | Agilent38MB | 7:150556056 | synon    | C/C | 4.40E-13 | 17  | 51 | 30 | 90 | 1/1 | 1/1 | 1/1 | match | match | match |
| 163383 | TruSeqV2    | 7:150556056 | synon    | C/C | 8.88E-15 | 77  | 99 | 29 | 87 | 1/1 | 1/1 | 1/1 | match | match | match |
| 198564 | Agilent38MB | 7:150556056 | synon    | C/C | 5.37E-12 | 27  | 81 | 46 | 99 | 1/1 | 1/1 | 1/1 | match | match | match |
| 108971 | TruSeqV2    | 7:150557622 | synon    | G/G | 1.33E-15 | 122 | 99 | 36 | 99 | 0/0 | 0/0 | 0/0 | match | match | match |
| 115239 | TruSeqV2    | 7:150557622 | synon    | A/G | 8.88E-16 | 80  | 99 | 21 | 99 | 0/1 | 0/1 | 0/1 | match | match | match |
| 132306 | Agilent38MB | 7:150557622 | synon    | A/G | 8.88E-16 | 33  | 99 | 29 | 99 | 0/1 | 0/1 | 0/1 | match | match | match |
| 163383 | TruSeqV2    | 7:150557622 | synon    | A/G | 1.11E-15 | 83  | 99 | 34 | 99 | 0/1 | 0/1 | 0/1 | match | match | match |
| 198564 | Agilent38MB | 7:150557622 | synon    | G/G | 1.33E-15 | 75  | 99 | 45 | 99 | 0/0 | 0/0 | 0/0 | match | match | match |
| 108971 | TruSeqV2    | 7:150557665 | missense | C/C | 9.77E-15 | 152 | 99 | 53 | 99 | 0/0 | 0/0 | 0/0 | match | match | match |
| 115239 | TruSeqV2    | 7:150557665 | missense | C/G | 7.93E-14 | 111 | 99 | 19 | 99 | 0/1 | 0/1 | 0/1 | match | match | match |
| 132306 | Agilent38MB | 7:150557665 | missense | C/G | 5.26E-14 | 130 | 99 | 41 | 99 | 0/1 | 0/1 | 0/1 | match | match | match |
| 163383 | TruSeqV2    | 7:150557665 | missense | C/G | 2.11E-14 | 111 | 99 | 40 | 99 | 0/1 | 0/1 | 0/1 | match | match | match |
| 198564 | Agilent38MB | 7:150557665 | missense | C/C | 2.81E-13 | 240 | 99 | 47 | 99 | 0/0 | 0/0 | 0/0 | match | match | match |
| 108971 | TruSeqV2    | 7:150558366 | 3'UTR    | C/T | 1.42E-14 | 10  | 80 | 24 | 99 | 0/1 | 0/1 | 0/1 | match | match | match |
| 115239 | TruSeqV2    | 7:150558366 | 3'UTR    | C/C | 5.55E-15 | 6   | 15 | 22 | 57 | 0/0 | 0/0 | 0/0 | match | match | match |
| 132306 | Agilent38MB | 7:150558366 | 3'UTR    | C/T | 4.66E-15 | 12  | 99 | 18 | 99 | 0/1 | 0/1 | 0/1 | match | match | match |
| 163383 | TruSeqV2    | 7:150558366 | 3'UTR    | C/C | 6.84E-14 | 11  | 24 | 28 | 66 | 0/0 | 0/0 | 0/0 | match | match | match |
| 198564 | Agilent38MB | 7:150558366 | 3'UTR    | C/C | 1.86E-13 | 14  | 21 | 37 | 84 | 0/0 | 0/0 | 0/0 | match | match | match |
| 198564 | Agilent38MB | 7:17338147  | promoter | C/C | 1.33E-15 | 4   | 6  | 14 | 42 | 0/0 | 0/0 | 0/0 | match | match | match |
| 115239 | TruSeqV2    | 7:17338425  | 5'UTR    | G/G | 1.66E-13 | 2   | 3  | 1  | 3  | 0/0 | 0/0 | 0/0 | match | match | match |
| 108971 | TruSeqV2    | 7:17339078  | intronic | C/C | 1.82E-07 | 2   | 6  | 13 | 36 | 0/0 | 0/0 | 0/0 | match | match | match |
| 115239 | TruSeqV2    | 7:17339078  | intronic | C/C | 6.66E-16 | 2   | 6  | 11 | 33 | 0/0 | 0/0 | 0/0 | match | match | match |
| 132306 | Agilent38MB | 7:17339078  | intronic | C/C | 2.22E-15 | 3   | 0  | 14 | 39 | 0/0 | 0/0 | 0/0 | match | match | match |
| 198564 | Agilent38MB | 7:17339078  | intronic | C/C | 1.33E-15 | 3   | 9  | 14 | 30 | 0/0 | 0/0 | 0/0 | match | match | match |
| 108971 | TruSeqV2    | 7:17379110  | missense | G/G | 4.44E-16 | 111 | 99 | 33 | 82 | 0/0 | 0/0 | 0/0 | match | match | match |

|        |             |            |          |     |          |     |    |    |    |     |     |     |       |       |       |
|--------|-------------|------------|----------|-----|----------|-----|----|----|----|-----|-----|-----|-------|-------|-------|
| 115239 | TruSeqV2    | 7:17379110 | missense | G/G | 2.22E-15 | 85  | 99 | 61 | 99 | 0/0 | 0/0 | 0/0 | match | match | match |
| 132306 | Agilent38MB | 7:17379110 | missense | G/G | 1.33E-15 | 157 | 99 | 28 | 66 | 0/0 | 0/0 | 0/0 | match | match | match |
| 163383 | TruSeqV2    | 7:17379110 | missense | A/G | 8.88E-16 | 112 | 99 | 48 | 99 | 0/1 | 0/1 | 0/1 | match | match | match |
| 198564 | Agilent38MB | 7:17379110 | missense | G/G | 3.77E-15 | 201 | 99 | 39 | 99 | 0/0 | 0/0 | 0/0 | match | match | match |
| 108971 | TruSeqV2    | 7:17385198 | 3'UTR    | C/C | 4.22E-15 | 68  | 99 | 45 | 99 | 0/0 | 0/0 | 0/0 | match | match | match |
| 115239 | TruSeqV2    | 7:17385198 | 3'UTR    | C/C | 2.10E-13 | 47  | 99 | 28 | 72 | 0/0 | 0/0 | 0/0 | match | match | match |
| 163383 | TruSeqV2    | 7:17385198 | 3'UTR    | C/C | 9.33E-15 | 60  | 99 | 46 | 99 | 0/0 | 0/0 | 0/0 | match | match | match |
| 108971 | TruSeqV2    | 7:17385270 | 3'UTR    | C/C | 4.44E-16 | 65  | 99 | 62 | 99 | 0/0 | 0/0 | 0/0 | match | match | match |
| 115239 | TruSeqV2    | 7:17385270 | 3'UTR    | C/C | 1.33E-15 | 43  | 99 | 48 | 99 | 0/0 | 0/0 | 0/0 | match | match | match |
| 163383 | TruSeqV2    | 7:17385270 | 3'UTR    | C/C | 4.44E-16 | 79  | 99 | 43 | 99 | 0/0 | 0/0 | 0/0 | match | match | match |
| 198564 | Agilent38MB | 7:75592925 | intronic | T/T | 1.78E-15 | 2   | 6  | 44 | 99 | 0/0 | 0/0 | 0/0 | match | match | match |
| 108971 | TruSeqV2    | 7:75616105 | 3'UTR    | G/G | 2.44E-15 | 93  | 99 | 54 | 99 | 0/0 | 0/0 | 0/0 | match | match | match |
| 115239 | TruSeqV2    | 7:75616105 | 3'UTR    | A/G | 2.24E-14 | 58  | 99 | 20 | 99 | 0/1 | 0/1 | 0/1 | match | match | match |
| 132306 | Agilent38MB | 7:75616105 | 3'UTR    | G/G | 1.78E-15 | 1   | 3  | 47 | 99 | 0/0 | 0/0 | 0/0 | match | match | match |
| 163383 | TruSeqV2    | 7:75616105 | 3'UTR    | G/G | 1.11E-15 | 73  | 99 | 52 | 99 | 0/0 | 0/0 | 0/0 | match | match | match |
| 108971 | TruSeqV2    | 7:75616171 | 3'UTR    | G/G | 1.82E-13 | 91  | 99 | 52 | 99 | 0/0 | 0/0 | 0/0 | match | match | match |
| 115239 | TruSeqV2    | 7:75616171 | 3'UTR    | G/G | 4.22E-07 | 55  | 99 | 20 | 54 | 0/0 | 0/0 | 0/0 | match | match | match |
| 163383 | TruSeqV2    | 7:75616171 | 3'UTR    | G/G | 5.69E-10 | 63  | 99 | 38 | 99 | 0/0 | 0/0 | 0/0 | match | match | match |
| 108971 | TruSeqV2    | 7:86990746 | missense | G/G | 4.44E-16 | 180 | 99 | 34 | 93 | 0/0 | 0/0 | 0/0 | match | match | match |
| 115239 | TruSeqV2    | 7:86990746 | missense | G/G | 2.22E-16 | 99  | 99 | 38 | 96 | 0/0 | 0/0 | 0/0 | match | match | match |
| 132306 | Agilent38MB | 7:86990746 | missense | G/G | 6.66E-16 | 202 | 99 | 23 | 63 | 0/0 | 0/0 | 0/0 | match | match | match |
| 163383 | TruSeqV2    | 7:86990746 | missense | G/G | 4.44E-16 | 178 | 99 | 26 | 72 | 0/0 | 0/0 | 0/0 | match | match | match |
| 198564 | Agilent38MB | 7:86990746 | missense | G/G | 2.22E-16 | 316 | 99 | 40 | 99 | 0/0 | 0/0 | 0/0 | match | match | match |
| 108971 | TruSeqV2    | 7:87021023 | missense | G/G | 4.44E-16 | 136 | 99 | 35 | 93 | 0/0 | 0/0 | 0/0 | match | match | match |
| 115239 | TruSeqV2    | 7:87021023 | missense | G/G | 4.44E-16 | 81  | 99 | 44 | 99 | 0/0 | 0/0 | 0/0 | match | match | match |
| 132306 | Agilent38MB | 7:87021023 | missense | G/G | 4.44E-16 | 114 | 99 | 33 | 78 | 0/0 | 0/0 | 0/0 | match | match | match |
| 163383 | TruSeqV2    | 7:87021023 | missense | G/G | 6.66E-16 | 103 | 99 | 32 | 81 | 0/0 | 0/0 | 0/0 | match | match | match |
| 198564 | Agilent38MB | 7:87021023 | missense | G/G | 4.44E-16 | 240 | 99 | 37 | 96 | 0/0 | 0/0 | 0/0 | match | match | match |
| 108971 | TruSeqV2    | 7:87029287 | 3'UTR    | G/G | 1.07E-13 | 3   | 9  | 36 | 99 | 1/1 | 1/1 | 1/1 | match | match | match |
| 108971 | TruSeqV2    | 7:87032531 | missense | T/T | 8.88E-16 | 196 | 99 | 43 | 99 | 0/0 | 0/0 | 0/0 | match | match | match |
| 115239 | TruSeqV2    | 7:87032531 | missense | T/T | 2.44E-15 | 139 | 99 | 36 | 99 | 0/0 | 0/0 | 0/0 | match | match | match |
| 132306 | Agilent38MB | 7:87032531 | missense | T/T | 4.44E-16 | 282 | 99 | 34 | 90 | 0/0 | 0/0 | 0/0 | match | match | match |
| 163383 | TruSeqV2    | 7:87032531 | missense | T/T | 8.88E-16 | 156 | 99 | 31 | 81 | 0/0 | 0/0 | 0/0 | match | match | match |
| 198564 | Agilent38MB | 7:87032531 | missense | T/T | 1.11E-15 | 524 | 99 | 43 | 79 | 0/0 | 0/0 | 0/0 | match | match | match |
| 108971 | TruSeqV2    | 7:87035792 | missense | C/C | 2.22E-16 | 101 | 99 | 44 | 99 | 0/0 | 0/0 | 0/0 | match | match | match |
| 115239 | TruSeqV2    | 7:87035792 | missense | C/C | 2.22E-16 | 90  | 99 | 44 | 99 | 0/0 | 0/0 | 0/0 | match | match | match |
| 132306 | Agilent38MB | 7:87035792 | missense | C/C | 4.44E-16 | 88  | 99 | 45 | 99 | 0/0 | 0/0 | 0/0 | match | match | match |
| 163383 | TruSeqV2    | 7:87035792 | missense | C/C | 6.66E-16 | 87  | 99 | 43 | 99 | 0/0 | 0/0 | 0/0 | match | match | match |

|        |             |            |          |     |          |     |    |    |    |     |     |     |       |       |       |
|--------|-------------|------------|----------|-----|----------|-----|----|----|----|-----|-----|-----|-------|-------|-------|
| 198564 | Agilent38MB | 7:87035792 | missense | C/C | 2.29E-14 | 180 | 99 | 43 | 99 | 0/0 | 0/0 | 0/0 | match | match | match |
| 108971 | TruSeqV2    | 7:87037488 | synon    | G/G | 6.66E-16 | 82  | 99 | 42 | 99 | 0/0 | 0/0 | 0/0 | match | match | match |
| 115239 | TruSeqV2    | 7:87037488 | synon    | G/G | 2.22E-16 | 65  | 99 | 36 | 99 | 0/0 | 0/0 | 0/0 | match | match | match |
| 132306 | Agilent38MB | 7:87037488 | synon    | G/G | 2.22E-16 | 129 | 99 | 33 | 87 | 0/0 | 0/0 | 0/0 | match | match | match |
| 163383 | TruSeqV2    | 7:87037488 | synon    | G/G | 2.22E-16 | 81  | 99 | 44 | 99 | 0/0 | 0/0 | 0/0 | match | match | match |
| 198564 | Agilent38MB | 7:87037488 | synon    | G/G | 4.44E-16 | 233 | 99 | 41 | 99 | 0/0 | 0/0 | 0/0 | match | match | match |
| 108971 | TruSeqV2    | 7:87037521 | synon    | A/A | 2.22E-16 | 65  | 99 | 57 | 99 | 0/0 | 0/0 | 0/0 | match | match | match |
| 115239 | TruSeqV2    | 7:87037521 | synon    | A/A | 4.44E-16 | 59  | 99 | 42 | 99 | 0/0 | 0/0 | 0/0 | match | match | match |
| 132306 | Agilent38MB | 7:87037521 | synon    | A/A | 6.66E-16 | 95  | 99 | 38 | 96 | 0/0 | 0/0 | 0/0 | match | match | match |
| 163383 | TruSeqV2    | 7:87037521 | synon    | A/A | 2.22E-16 | 72  | 99 | 54 | 99 | 0/0 | 0/0 | 0/0 | match | match | match |
| 198564 | Agilent38MB | 7:87037521 | synon    | A/A | 1.78E-15 | 170 | 99 | 53 | 99 | 0/0 | 0/0 | 0/0 | match | match | match |
| 108971 | TruSeqV2    | 7:87038681 | synon    | T/T | 2.22E-16 | 189 | 99 | 58 | 99 | 0/0 | 0/0 | 0/0 | match | match | match |
| 115239 | TruSeqV2    | 7:87038681 | synon    | T/T | 2.22E-16 | 132 | 99 | 39 | 99 | 0/0 | 0/0 | 0/0 | match | match | match |
| 132306 | Agilent38MB | 7:87038681 | synon    | T/T | 2.22E-16 | 107 | 99 | 45 | 99 | 0/0 | 0/0 | 0/0 | match | match | match |
| 163383 | TruSeqV2    | 7:87038681 | synon    | T/T | 2.22E-16 | 200 | 99 | 54 | 99 | 0/0 | 0/0 | 0/0 | match | match | match |
| 198564 | Agilent38MB | 7:87038681 | synon    | T/T | 1.55E-15 | 184 | 99 | 47 | 99 | 0/0 | 0/0 | 0/0 | match | match | match |
| 108971 | TruSeqV2    | 7:87046751 | synon    | A/A | 2.22E-16 | 104 | 99 | 38 | 90 | 0/0 | 0/0 | 0/0 | match | match | match |
| 115239 | TruSeqV2    | 7:87046751 | synon    | A/A | 8.88E-16 | 81  | 99 | 52 | 99 | 0/0 | 0/0 | 0/0 | match | match | match |
| 132306 | Agilent38MB | 7:87046751 | synon    | A/A | 2.22E-16 | 87  | 99 | 44 | 99 | 0/0 | 0/0 | 0/0 | match | match | match |
| 163383 | TruSeqV2    | 7:87046751 | synon    | A/A | 4.44E-16 | 94  | 99 | 38 | 90 | 0/0 | 0/0 | 0/0 | match | match | match |
| 198564 | Agilent38MB | 7:87046751 | synon    | A/A | 8.88E-14 | 148 | 99 | 48 | 99 | 0/0 | 0/0 | 0/0 | match | match | match |
| 108971 | TruSeqV2    | 7:87049345 | missense | C/C | 3.33E-15 | 194 | 99 | 41 | 99 | 0/0 | 0/0 | 0/0 | match | match | match |
| 115239 | TruSeqV2    | 7:87049345 | missense | C/C | 8.88E-16 | 128 | 99 | 42 | 99 | 0/0 | 0/0 | 0/0 | match | match | match |
| 132306 | Agilent38MB | 7:87049345 | missense | C/C | 2.00E-15 | 72  | 99 | 34 | 93 | 0/0 | 0/0 | 0/0 | match | match | match |
| 163383 | TruSeqV2    | 7:87049345 | missense | C/C | 2.89E-15 | 192 | 99 | 41 | 99 | 0/0 | 0/0 | 0/0 | match | match | match |
| 198564 | Agilent38MB | 7:87049345 | missense | C/C | 3.11E-15 | 179 | 99 | 28 | 75 | 0/0 | 0/0 | 0/0 | match | match | match |
| 108971 | TruSeqV2    | 7:87049383 | synon    | C/C | 4.44E-16 | 200 | 99 | 29 | 75 | 0/0 | 0/0 | 0/0 | match | match | match |
| 115239 | TruSeqV2    | 7:87049383 | synon    | C/C | 1.11E-15 | 128 | 99 | 38 | 99 | 0/0 | 0/0 | 0/0 | match | match | match |
| 132306 | Agilent38MB | 7:87049383 | synon    | C/C | 2.89E-15 | 40  | 93 | 35 | 93 | 0/0 | 0/0 | 0/0 | match | match | match |
| 163383 | TruSeqV2    | 7:87049383 | synon    | C/C | 1.78E-15 | 183 | 99 | 41 | 99 | 0/0 | 0/0 | 0/0 | match | match | match |
| 198564 | Agilent38MB | 7:87049383 | synon    | C/C | 2.00E-15 | 106 | 99 | 26 | 72 | 0/0 | 0/0 | 0/0 | match | match | match |
| 108971 | TruSeqV2    | 7:87056157 | stop     | C/C | 2.22E-16 | 93  | 99 | 39 | 96 | 0/0 | 0/0 | 0/0 | match | match | match |
| 115239 | TruSeqV2    | 7:87056157 | stop     | C/C | 2.22E-16 | 72  | 99 | 45 | 99 | 0/0 | 0/0 | 0/0 | match | match | match |
| 132306 | Agilent38MB | 7:87056157 | stop     | C/C | 2.22E-16 | 78  | 99 | 43 | 99 | 0/0 | 0/0 | 0/0 | match | match | match |
| 163383 | TruSeqV2    | 7:87056157 | stop     | C/C | 2.22E-16 | 88  | 99 | 25 | 63 | 0/0 | 0/0 | 0/0 | match | match | match |
| 198564 | Agilent38MB | 7:87056157 | stop     | C/C | 6.66E-16 | 123 | 99 | 34 | 90 | 0/0 | 0/0 | 0/0 | match | match | match |
| 108971 | TruSeqV2    | 7:87056176 | missense | T/T | 8.88E-16 | 85  | 99 | 40 | 99 | 0/0 | 0/0 | 0/0 | match | match | match |
| 115239 | TruSeqV2    | 7:87056176 | missense | T/T | 4.44E-16 | 66  | 99 | 38 | 69 | 0/0 | 0/0 | 0/0 | match | match | match |

|        |             |            |          |     |          |     |    |    |    |     |     |     |       |       |       |
|--------|-------------|------------|----------|-----|----------|-----|----|----|----|-----|-----|-----|-------|-------|-------|
| 132306 | Agilent38MB | 7:87056176 | missense | T/T | 1.11E-15 | 82  | 99 | 48 | 99 | 0/0 | 0/0 | 0/0 | match | match | match |
| 163383 | TruSeqV2    | 7:87056176 | missense | T/T | 8.88E-16 | 83  | 99 | 25 | 60 | 0/0 | 0/0 | 0/0 | match | match | match |
| 198564 | Agilent38MB | 7:87056176 | missense | T/T | 3.77E-15 | 138 | 99 | 36 | 99 | 0/0 | 0/0 | 0/0 | match | match | match |
| 108971 | TruSeqV2    | 7:87056224 | stop     | G/G | 1.54E-13 | 67  | 99 | 27 | 75 | 0/0 | 0/0 | 0/0 | match | match | match |
| 115239 | TruSeqV2    | 7:87056224 | stop     | G/G | 3.55E-15 | 58  | 99 | 31 | 84 | 0/0 | 0/0 | 0/0 | match | match | match |
| 132306 | Agilent38MB | 7:87056224 | stop     | G/G | 9.99E-15 | 63  | 99 | 36 | 84 | 0/0 | 0/0 | 0/0 | match | match | match |
| 163383 | TruSeqV2    | 7:87056224 | stop     | G/G | 4.06E-14 | 51  | 99 | 21 | 51 | 0/0 | 0/0 | 0/0 | match | match | match |
| 198564 | Agilent38MB | 7:87056224 | stop     | G/G | 3.04E-14 | 95  | 99 | 37 | 90 | 0/0 | 0/0 | 0/0 | match | match | match |
| 108971 | TruSeqV2    | 7:87069130 | missense | C/C | 8.88E-16 | 64  | 99 | 37 | 93 | 0/0 | 0/0 | 0/0 | match | match | match |
| 115239 | TruSeqV2    | 7:87069130 | missense | C/C | 6.66E-16 | 36  | 93 | 32 | 90 | 0/0 | 0/0 | 0/0 | match | match | match |
| 132306 | Agilent38MB | 7:87069130 | missense | C/C | 1.11E-15 | 161 | 99 | 41 | 99 | 0/0 | 0/0 | 0/0 | match | match | match |
| 163383 | TruSeqV2    | 7:87069130 | missense | C/C | 4.44E-16 | 59  | 99 | 43 | 99 | 0/0 | 0/0 | 0/0 | match | match | match |
| 198564 | Agilent38MB | 7:87069130 | missense | C/C | 1.55E-15 | 347 | 99 | 50 | 99 | 0/0 | 0/0 | 0/0 | match | match | match |
| 108971 | TruSeqV2    | 7:87079405 | missense | G/G | 1.11E-15 | 126 | 99 | 47 | 99 | 0/0 | 0/0 | 0/0 | match | match | match |
| 115239 | TruSeqV2    | 7:87079405 | missense | G/G | 1.78E-15 | 82  | 99 | 48 | 99 | 0/0 | 0/0 | 0/0 | match | match | match |
| 132306 | Agilent38MB | 7:87079405 | missense | G/G | 4.44E-16 | 109 | 99 | 53 | 99 | 0/0 | 0/0 | 0/0 | match | match | match |
| 163383 | TruSeqV2    | 7:87079405 | missense | G/G | 8.88E-16 | 119 | 99 | 51 | 99 | 0/0 | 0/0 | 0/0 | match | match | match |
| 198564 | Agilent38MB | 7:87079405 | missense | G/G | 6.66E-16 | 225 | 99 | 44 | 99 | 0/0 | 0/0 | 0/0 | match | match | match |
| 108971 | TruSeqV2    | 7:87079406 | synon    | T/T | 4.44E-16 | 123 | 99 | 45 | 99 | 0/0 | 0/0 | 0/0 | match | match | match |
| 115239 | TruSeqV2    | 7:87079406 | synon    | T/T | 6.66E-16 | 80  | 99 | 49 | 99 | 0/0 | 0/0 | 0/0 | match | match | match |
| 132306 | Agilent38MB | 7:87079406 | synon    | T/T | 4.44E-16 | 107 | 99 | 51 | 99 | 0/0 | 0/0 | 0/0 | match | match | match |
| 163383 | TruSeqV2    | 7:87079406 | synon    | T/A | 4.44E-16 | 118 | 99 | 49 | 99 | 0/1 | 0/1 | 0/1 | match | match | match |
| 198564 | Agilent38MB | 7:87079406 | synon    | T/T | 6.66E-16 | 223 | 99 | 45 | 99 | 0/0 | 0/0 | 0/0 | match | match | match |
| 108971 | TruSeqV2    | 7:87080951 | synon    | G/G | 8.44E-15 | 244 | 99 | 57 | 99 | 0/0 | 0/0 | 0/0 | match | match | match |
| 115239 | TruSeqV2    | 7:87080951 | synon    | G/G | 2.02E-14 | 178 | 99 | 43 | 99 | 0/0 | 0/0 | 0/0 | match | match | match |
| 132306 | Agilent38MB | 7:87080951 | synon    | G/G | 6.66E-16 | 87  | 99 | 33 | 90 | 0/0 | 0/0 | 0/0 | match | match | match |
| 163383 | TruSeqV2    | 7:87080951 | synon    | G/G | 9.10E-15 | 258 | 99 | 37 | 96 | 0/0 | 0/0 | 0/0 | match | match | match |
| 198564 | Agilent38MB | 7:87080951 | synon    | G/G | 2.44E-15 | 169 | 99 | 43 | 99 | 0/0 | 0/0 | 0/0 | match | match | match |
| 108971 | TruSeqV2    | 7:87082292 | synon    | A/A | 6.88E-15 | 62  | 99 | 42 | 99 | 1/1 | 1/1 | 1/1 | match | match | match |
| 115239 | TruSeqV2    | 7:87082292 | synon    | G/A | 2.89E-15 | 43  | 99 | 63 | 99 | 0/1 | 0/1 | 0/1 | match | match | match |
| 132306 | Agilent38MB | 7:87082292 | synon    | A/A | 1.60E-14 | 139 | 99 | 38 | 99 | 1/1 | 1/1 | 1/1 | match | match | match |
| 163383 | TruSeqV2    | 7:87082292 | synon    | G/A | 1.11E-15 | 47  | 99 | 51 | 99 | 0/1 | 0/1 | 0/1 | match | match | match |
| 198564 | Agilent38MB | 7:87082292 | synon    | A/A | 2.62E-14 | 230 | 99 | 44 | 99 | 1/1 | 1/1 | 1/1 | match | match | match |
| 108971 | TruSeqV2    | 7:87082366 | stop     | G/G | 4.44E-16 | 52  | 99 | 35 | 87 | 0/0 | 0/0 | 0/0 | match | match | match |
| 115239 | TruSeqV2    | 7:87082366 | stop     | G/G | 8.88E-16 | 38  | 99 | 47 | 99 | 0/0 | 0/0 | 0/0 | match | match | match |
| 132306 | Agilent38MB | 7:87082366 | stop     | G/G | 4.44E-16 | 62  | 99 | 27 | 66 | 0/0 | 0/0 | 0/0 | match | match | match |
| 163383 | TruSeqV2    | 7:87082366 | stop     | G/G | 6.66E-16 | 42  | 99 | 31 | 92 | 0/0 | 0/0 | 0/0 | match | match | match |
| 198564 | Agilent38MB | 7:87082366 | stop     | G/G | 4.44E-16 | 85  | 99 | 38 | 99 | 0/0 | 0/0 | 0/0 | match | match | match |

|        |             |            |          |     |          |     |    |    |    |     |     |     |       |       |       |
|--------|-------------|------------|----------|-----|----------|-----|----|----|----|-----|-----|-----|-------|-------|-------|
| 108971 | TruSeqV2    | 7:87092120 | synon    | C/C | 2.22E-16 | 94  | 99 | 36 | 93 | 0/0 | 0/0 | 0/0 | match | match | match |
| 115239 | TruSeqV2    | 7:87092120 | synon    | C/C | 4.44E-16 | 65  | 99 | 45 | 99 | 0/0 | 0/0 | 0/0 | match | match | match |
| 132306 | Agilent38MB | 7:87092120 | synon    | C/C | 2.22E-16 | 74  | 99 | 41 | 99 | 0/0 | 0/0 | 0/0 | match | match | match |
| 163383 | TruSeqV2    | 7:87092120 | synon    | C/C | 4.44E-16 | 89  | 99 | 42 | 99 | 0/0 | 0/0 | 0/0 | match | match | match |
| 198564 | Agilent38MB | 7:87092120 | synon    | C/C | 8.88E-16 | 124 | 99 | 48 | 99 | 0/0 | 0/0 | 0/0 | match | match | match |
| 108971 | TruSeqV2    | 7:87092143 | missense | G/G | 2.22E-16 | 102 | 99 | 32 | 84 | 0/0 | 0/0 | 0/0 | match | match | match |
| 115239 | TruSeqV2    | 7:87092143 | missense | G/G | 6.66E-16 | 66  | 99 | 44 | 99 | 0/0 | 0/0 | 0/0 | match | match | match |
| 132306 | Agilent38MB | 7:87092143 | missense | G/G | 1.55E-15 | 71  | 99 | 34 | 81 | 0/0 | 0/0 | 0/0 | match | match | match |
| 163383 | TruSeqV2    | 7:87092143 | missense | G/G | 5.33E-15 | 112 | 99 | 38 | 99 | 0/0 | 0/0 | 0/0 | match | match | match |
| 198564 | Agilent38MB | 7:87092143 | missense | G/G | 2.22E-16 | 121 | 99 | 39 | 99 | 0/0 | 0/0 | 0/0 | match | match | match |
| 108971 | TruSeqV2    | 7:87092185 | synon    | G/G | 4.44E-16 | 105 | 99 | 28 | 72 | 0/0 | 0/0 | 0/0 | match | match | match |
| 115239 | TruSeqV2    | 7:87092185 | synon    | G/G | 4.44E-16 | 72  | 99 | 41 | 99 | 0/0 | 0/0 | 0/0 | match | match | match |
| 132306 | Agilent38MB | 7:87092185 | synon    | G/G | 2.22E-16 | 75  | 99 | 28 | 72 | 0/0 | 0/0 | 0/0 | match | match | match |
| 163383 | TruSeqV2    | 7:87092185 | synon    | G/A | 4.44E-16 | 97  | 99 | 37 | 99 | 0/1 | 0/1 | 0/1 | match | match | match |
| 198564 | Agilent38MB | 7:87092185 | synon    | G/G | 4.20E-14 | 134 | 99 | 41 | 99 | 0/0 | 0/0 | 0/0 | match | match | match |
| 108971 | TruSeqV2    | 7:87092213 | synon    | G/G | 6.66E-16 | 92  | 99 | 33 | 84 | 0/0 | 0/0 | 0/0 | match | match | match |
| 115239 | TruSeqV2    | 7:87092213 | synon    | G/G | 3.77E-15 | 61  | 99 | 43 | 99 | 0/0 | 0/0 | 0/0 | match | match | match |
| 132306 | Agilent38MB | 7:87092213 | synon    | G/G | 4.44E-16 | 38  | 72 | 36 | 93 | 0/0 | 0/0 | 0/0 | match | match | match |
| 163383 | TruSeqV2    | 7:87092213 | synon    | G/G | 1.78E-15 | 86  | 99 | 44 | 99 | 0/0 | 0/0 | 0/0 | match | match | match |
| 198564 | Agilent38MB | 7:87092213 | synon    | G/G | 1.55E-13 | 104 | 99 | 44 | 99 | 0/0 | 0/0 | 0/0 | match | match | match |
| 132306 | Agilent38MB | 7:87106265 | promoter | A/A | 6.66E-16 | 2   | 6  | 34 | 99 | 0/0 | 0/0 | 0/0 | match | match | match |
| 198564 | Agilent38MB | 7:87106265 | promoter | A/A | 6.66E-16 | 3   | 9  | 39 | 99 | 0/0 | 0/0 | 0/0 | match | match | match |
| 108971 | TruSeqV2    | 7:87133366 | 3'UTR    | T/T | 4.22E-15 | 110 | 99 | 47 | 99 | 0/0 | 0/0 | 0/0 | match | match | match |
| 115239 | TruSeqV2    | 7:87133366 | 3'UTR    | T/T | 1.33E-15 | 70  | 99 | 38 | 76 | 0/0 | 0/0 | 0/0 | match | match | match |
| 163383 | TruSeqV2    | 7:87133366 | 3'UTR    | T/C | 6.44E-15 | 101 | 99 | 31 | 99 | 0/1 | 0/1 | 0/1 | match | match | match |
| 108971 | TruSeqV2    | 7:87133470 | 3'UTR    | T/T | 4.44E-16 | 135 | 99 | 53 | 99 | 0/0 | 0/0 | 0/0 | match | match | match |
| 115239 | TruSeqV2    | 7:87133470 | 3'UTR    | T/T | 4.44E-16 | 70  | 99 | 42 | 99 | 0/0 | 0/0 | 0/0 | match | match | match |
| 132306 | Agilent38MB | 7:87133470 | 3'UTR    | T/T | 1.33E-15 | 6   | 18 | 45 | 99 | 0/0 | 0/0 | 0/0 | match | match | match |
| 163383 | TruSeqV2    | 7:87133470 | 3'UTR    | T/A | 5.55E-14 | 101 | 99 | 45 | 99 | 0/1 | 0/1 | 0/1 | match | match | match |
| 198564 | Agilent38MB | 7:87133470 | 3'UTR    | T/T | 1.11E-15 | 5   | 15 | 40 | 99 | 0/0 | 0/0 | 0/0 | match | match | match |
| 108971 | TruSeqV2    | 7:87133651 | missense | C/C | 6.00E-15 | 314 | 99 | 26 | 69 | 0/0 | 0/0 | 0/0 | match | match | match |
| 115239 | TruSeqV2    | 7:87133651 | missense | C/C | 1.78E-15 | 177 | 99 | 35 | 93 | 0/0 | 0/0 | 0/0 | match | match | match |
| 132306 | Agilent38MB | 7:87133651 | missense | C/C | 2.22E-16 | 206 | 99 | 26 | 72 | 0/0 | 0/0 | 0/0 | match | match | match |
| 163383 | TruSeqV2    | 7:87133651 | missense | C/C | 1.33E-15 | 250 | 99 | 23 | 66 | 0/0 | 0/0 | 0/0 | match | match | match |
| 198564 | Agilent38MB | 7:87133651 | missense | C/C | 1.33E-15 | 453 | 99 | 36 | 90 | 0/0 | 0/0 | 0/0 | match | match | match |
| 108971 | TruSeqV2    | 7:87133655 | synon    | G/G | 4.55E-14 | 297 | 99 | 25 | 66 | 0/0 | 0/0 | 0/0 | match | match | match |
| 115239 | TruSeqV2    | 7:87133655 | synon    | G/G | 7.55E-15 | 171 | 99 | 35 | 96 | 0/0 | 0/0 | 0/0 | match | match | match |
| 132306 | Agilent38MB | 7:87133655 | synon    | G/G | 6.22E-15 | 209 | 99 | 28 | 78 | 0/0 | 0/0 | 0/0 | match | match | match |

|        |             |            |          |     |          |     |    |    |    |     |     |     |       |       |       |
|--------|-------------|------------|----------|-----|----------|-----|----|----|----|-----|-----|-----|-------|-------|-------|
| 163383 | TruSeqV2    | 7:87133655 | synon    | G/G | 3.55E-14 | 232 | 99 | 22 | 63 | 0/0 | 0/0 | 0/0 | match | match | match |
| 198564 | Agilent38MB | 7:87133655 | synon    | G/G | 1.78E-15 | 455 | 99 | 33 | 83 | 0/0 | 0/0 | 0/0 | match | match | match |
| 108971 | TruSeqV2    | 7:87138645 | synon    | G/A | 4.44E-16 | 90  | 99 | 34 | 99 | 0/1 | 0/1 | 0/1 | match | match | match |
| 115239 | TruSeqV2    | 7:87138645 | synon    | G/G | 7.77E-15 | 70  | 99 | 35 | 99 | 1/1 | 1/1 | 1/1 | match | match | match |
| 132306 | Agilent38MB | 7:87138645 | synon    | A/A | 1.11E-14 | 163 | 99 | 37 | 99 | 0/0 | 0/0 | 0/0 | match | match | match |
| 163383 | TruSeqV2    | 7:87138645 | synon    | G/A | 4.44E-16 | 83  | 99 | 30 | 99 | 0/1 | 0/1 | 0/1 | match | match | match |
| 198564 | Agilent38MB | 7:87138645 | synon    | G/A | 2.22E-16 | 271 | 99 | 40 | 99 | 0/1 | 0/1 | 0/1 | match | match | match |
| 108971 | TruSeqV2    | 7:87138659 | missense | A/A | 8.88E-16 | 94  | 99 | 34 | 93 | 0/0 | 0/0 | 0/0 | match | match | match |
| 115239 | TruSeqV2    | 7:87138659 | missense | A/A | 8.88E-16 | 74  | 99 | 35 | 93 | 0/0 | 0/0 | 0/0 | match | match | match |
| 132306 | Agilent38MB | 7:87138659 | missense | A/A | 1.55E-15 | 187 | 99 | 36 | 90 | 0/0 | 0/0 | 0/0 | match | match | match |
| 163383 | TruSeqV2    | 7:87138659 | missense | A/A | 8.88E-16 | 96  | 99 | 30 | 81 | 0/0 | 0/0 | 0/0 | match | match | match |
| 198564 | Agilent38MB | 7:87138659 | missense | A/A | 6.66E-16 | 301 | 99 | 36 | 99 | 0/0 | 0/0 | 0/0 | match | match | match |
| 108971 | TruSeqV2    | 7:87144640 | synon    | G/G | 4.17E-13 | 110 | 99 | 17 | 45 | 0/0 | 0/0 | 0/0 | match | match | match |
| 115239 | TruSeqV2    | 7:87144640 | synon    | G/G | 2.22E-15 | 68  | 99 | 29 | 72 | 0/0 | 0/0 | 0/0 | match | match | match |
| 132306 | Agilent38MB | 7:87144640 | synon    | G/G | 1.60E-13 | 81  | 99 | 29 | 84 | 0/0 | 0/0 | 0/0 | match | match | match |
| 163383 | TruSeqV2    | 7:87144640 | synon    | G/G | 1.62E-14 | 87  | 99 | 26 | 75 | 0/0 | 0/0 | 0/0 | match | match | match |
| 198564 | Agilent38MB | 7:87144640 | synon    | G/G | 7.70E-14 | 154 | 99 | 23 | 66 | 0/0 | 0/0 | 0/0 | match | match | match |
| 108971 | TruSeqV2    | 7:87144641 | missense | C/C | 2.09E-12 | 109 | 99 | 15 | 45 | 0/0 | 0/0 | 0/0 | match | match | match |
| 115239 | TruSeqV2    | 7:87144641 | missense | C/C | 2.22E-15 | 69  | 99 | 27 | 72 | 0/0 | 0/0 | 0/0 | match | match | match |
| 132306 | Agilent38MB | 7:87144641 | missense | C/C | 1.73E-13 | 78  | 99 | 29 | 87 | 0/0 | 0/0 | 0/0 | match | match | match |
| 163383 | TruSeqV2    | 7:87144641 | missense | C/C | 9.10E-14 | 89  | 99 | 26 | 53 | 0/0 | 0/0 | 0/0 | match | match | match |
| 198564 | Agilent38MB | 7:87144641 | missense | C/C | 1.01E-13 | 152 | 99 | 25 | 57 | 0/0 | 0/0 | 0/0 | match | match | match |
| 108971 | TruSeqV2    | 7:87144678 | missense | G/G | 4.44E-16 | 113 | 99 | 26 | 78 | 0/0 | 0/0 | 0/0 | match | match | match |
| 115239 | TruSeqV2    | 7:87144678 | missense | G/G | 8.88E-16 | 76  | 99 | 33 | 90 | 0/0 | 0/0 | 0/0 | match | match | match |
| 132306 | Agilent38MB | 7:87144678 | missense | G/G | 4.44E-16 | 94  | 99 | 35 | 96 | 0/0 | 0/0 | 0/0 | match | match | match |
| 163383 | TruSeqV2    | 7:87144678 | missense | G/G | 1.11E-15 | 88  | 99 | 34 | 99 | 0/0 | 0/0 | 0/0 | match | match | match |
| 198564 | Agilent38MB | 7:87144678 | missense | G/G | 3.77E-15 | 179 | 99 | 34 | 87 | 0/0 | 0/0 | 0/0 | match | match | match |
| 108971 | TruSeqV2    | 7:87145825 | synon    | C/C | 2.22E-16 | 111 | 99 | 30 | 87 | 0/0 | 0/0 | 0/0 | match | match | match |
| 115239 | TruSeqV2    | 7:87145825 | synon    | C/C | 2.22E-16 | 75  | 99 | 44 | 99 | 0/0 | 0/0 | 0/0 | match | match | match |
| 132306 | Agilent38MB | 7:87145825 | synon    | C/C | 2.22E-16 | 248 | 99 | 19 | 51 | 0/0 | 0/0 | 0/0 | match | match | match |
| 163383 | TruSeqV2    | 7:87145825 | synon    | C/C | 2.22E-16 | 84  | 99 | 31 | 66 | 0/0 | 0/0 | 0/0 | match | match | match |
| 198564 | Agilent38MB | 7:87145825 | synon    | C/C | 2.22E-16 | 441 | 99 | 44 | 99 | 0/0 | 0/0 | 0/0 | match | match | match |
| 108971 | TruSeqV2    | 7:87145914 | missense | C/C | 2.22E-16 | 155 | 99 | 44 | 99 | 0/0 | 0/0 | 0/0 | match | match | match |
| 115239 | TruSeqV2    | 7:87145914 | missense | C/C | 2.22E-16 | 125 | 99 | 43 | 85 | 0/0 | 0/0 | 0/0 | match | match | match |
| 132306 | Agilent38MB | 7:87145914 | missense | C/C | 2.22E-16 | 118 | 99 | 30 | 84 | 0/0 | 0/0 | 0/0 | match | match | match |
| 163383 | TruSeqV2    | 7:87145914 | missense | C/C | 2.22E-16 | 151 | 99 | 36 | 99 | 0/0 | 0/0 | 0/0 | match | match | match |
| 198564 | Agilent38MB | 7:87145914 | missense | C/C | 1.47E-14 | 257 | 99 | 29 | 78 | 0/0 | 0/0 | 0/0 | match | match | match |
| 108971 | TruSeqV2    | 7:87160618 | missense | C/A | 1.11E-15 | 74  | 99 | 44 | 99 | 0/1 | 0/1 | 0/1 | match | match | match |

|        |             |            |          |     |          |     |    |    |    |     |     |     |       |       |       |
|--------|-------------|------------|----------|-----|----------|-----|----|----|----|-----|-----|-----|-------|-------|-------|
| 115239 | TruSeqV2    | 7:87160618 | missense | C/A | 4.44E-16 | 42  | 99 | 46 | 99 | 0/1 | 0/1 | 0/1 | match | match | match |
| 132306 | Agilent38MB | 7:87160618 | missense | A/A | 4.44E-16 | 146 | 99 | 38 | 96 | 0/0 | 0/0 | 0/0 | match | match | match |
| 163383 | TruSeqV2    | 7:87160618 | missense | C/A | 4.44E-16 | 67  | 99 | 26 | 99 | 0/1 | 0/1 | 0/1 | match | match | match |
| 198564 | Agilent38MB | 7:87160618 | missense | C/A | 6.66E-16 | 259 | 99 | 34 | 99 | 0/1 | 0/1 | 0/1 | match | match | match |
| 108971 | TruSeqV2    | 7:87160645 | synon    | G/G | 1.11E-15 | 89  | 99 | 34 | 93 | 0/0 | 0/0 | 0/0 | match | match | match |
| 115239 | TruSeqV2    | 7:87160645 | synon    | G/G | 1.11E-15 | 47  | 99 | 39 | 99 | 0/0 | 0/0 | 0/0 | match | match | match |
| 132306 | Agilent38MB | 7:87160645 | synon    | G/G | 8.88E-16 | 202 | 99 | 34 | 87 | 0/0 | 0/0 | 0/0 | match | match | match |
| 163383 | TruSeqV2    | 7:87160645 | synon    | G/G | 6.66E-16 | 93  | 99 | 33 | 78 | 0/0 | 0/0 | 0/0 | match | match | match |
| 198564 | Agilent38MB | 7:87160645 | synon    | G/G | 6.66E-15 | 374 | 99 | 31 | 84 | 0/0 | 0/0 | 0/0 | match | match | match |
| 108971 | TruSeqV2    | 7:87160789 | missense | T/T | 1.11E-15 | 41  | 90 | 49 | 99 | 0/0 | 0/0 | 0/0 | match | match | match |
| 115239 | TruSeqV2    | 7:87160789 | missense | T/T | 4.88E-14 | 30  | 78 | 48 | 99 | 0/0 | 0/0 | 0/0 | match | match | match |
| 132306 | Agilent38MB | 7:87160789 | missense | T/T | 1.33E-15 | 74  | 99 | 46 | 99 | 0/0 | 0/0 | 0/0 | match | match | match |
| 163383 | TruSeqV2    | 7:87160789 | missense | T/T | 1.33E-15 | 54  | 99 | 49 | 99 | 0/0 | 0/0 | 0/0 | match | match | match |
| 198564 | Agilent38MB | 7:87160789 | missense | T/T | 2.22E-15 | 140 | 99 | 63 | 99 | 0/0 | 0/0 | 0/0 | match | match | match |
| 108971 | TruSeqV2    | 7:87160790 | synon    | T/T | 1.11E-15 | 39  | 93 | 49 | 99 | 0/0 | 0/0 | 0/0 | match | match | match |
| 115239 | TruSeqV2    | 7:87160790 | synon    | T/T | 5.55E-15 | 31  | 81 | 47 | 99 | 0/0 | 0/0 | 0/0 | match | match | match |
| 132306 | Agilent38MB | 7:87160790 | synon    | T/T | 2.22E-16 | 75  | 99 | 45 | 99 | 0/0 | 0/0 | 0/0 | match | match | match |
| 163383 | TruSeqV2    | 7:87160790 | synon    | T/T | 4.44E-16 | 55  | 99 | 51 | 99 | 0/0 | 0/0 | 0/0 | match | match | match |
| 198564 | Agilent38MB | 7:87160790 | synon    | T/T | 7.33E-15 | 141 | 99 | 64 | 99 | 0/0 | 0/0 | 0/0 | match | match | match |
| 108971 | TruSeqV2    | 7:87160810 | missense | T/T | 2.22E-16 | 32  | 87 | 45 | 99 | 0/0 | 0/0 | 0/0 | match | match | match |
| 115239 | TruSeqV2    | 7:87160810 | missense | T/T | 2.22E-16 | 24  | 63 | 47 | 99 | 0/0 | 0/0 | 0/0 | match | match | match |
| 132306 | Agilent38MB | 7:87160810 | missense | T/T | 2.22E-16 | 46  | 99 | 50 | 99 | 0/0 | 0/0 | 0/0 | match | match | match |
| 163383 | TruSeqV2    | 7:87160810 | missense | T/T | 2.22E-16 | 46  | 99 | 58 | 99 | 0/0 | 0/0 | 0/0 | match | match | match |
| 198564 | Agilent38MB | 7:87160810 | missense | T/T | 2.22E-16 | 84  | 99 | 59 | 99 | 0/0 | 0/0 | 0/0 | match | match | match |
| 108971 | TruSeqV2    | 7:87165750 | intronic | C/C | 4.44E-16 | 87  | 99 | 37 | 99 | 0/0 | 0/0 | 0/0 | match | match | match |
| 115239 | TruSeqV2    | 7:87165750 | intronic | T/C | 1.11E-15 | 64  | 99 | 44 | 99 | 0/1 | 0/1 | 0/1 | match | match | match |
| 132306 | Agilent38MB | 7:87165750 | intronic | C/C | 6.66E-16 | 39  | 99 | 42 | 99 | 0/0 | 0/0 | 0/0 | match | match | match |
| 163383 | TruSeqV2    | 7:87165750 | intronic | C/C | 6.66E-16 | 113 | 99 | 53 | 99 | 0/0 | 0/0 | 0/0 | match | match | match |
| 198564 | Agilent38MB | 7:87165750 | intronic | C/C | 4.00E-15 | 78  | 99 | 32 | 87 | 0/0 | 0/0 | 0/0 | match | match | match |
| 108971 | TruSeqV2    | 7:87165854 | missense | C/C | 4.44E-16 | 144 | 99 | 41 | 99 | 0/0 | 0/0 | 0/0 | match | match | match |
| 115239 | TruSeqV2    | 7:87165854 | missense | C/C | 2.22E-16 | 94  | 99 | 43 | 99 | 0/0 | 0/0 | 0/0 | match | match | match |
| 132306 | Agilent38MB | 7:87165854 | missense | C/C | 4.44E-16 | 80  | 99 | 41 | 99 | 0/0 | 0/0 | 0/0 | match | match | match |
| 163383 | TruSeqV2    | 7:87165854 | missense | C/C | 4.44E-16 | 154 | 99 | 34 | 87 | 0/0 | 0/0 | 0/0 | match | match | match |
| 198564 | Agilent38MB | 7:87165854 | missense | C/C | 1.11E-15 | 155 | 99 | 36 | 92 | 0/0 | 0/0 | 0/0 | match | match | match |
| 108971 | TruSeqV2    | 7:87175271 | missense | C/C | 7.99E-15 | 171 | 99 | 36 | 87 | 0/0 | 0/0 | 0/0 | match | match | match |
| 115239 | TruSeqV2    | 7:87175271 | missense | C/C | 6.66E-16 | 123 | 99 | 40 | 99 | 0/0 | 0/0 | 0/0 | match | match | match |
| 132306 | Agilent38MB | 7:87175271 | missense | C/C | 2.44E-15 | 183 | 99 | 23 | 63 | 0/0 | 0/0 | 0/0 | match | match | match |
| 163383 | TruSeqV2    | 7:87175271 | missense | C/C | 1.33E-15 | 147 | 99 | 34 | 96 | 0/0 | 0/0 | 0/0 | match | match | match |



|        |             |            |          |     |          |     |    |    |    |     |     |     |       |       |       |
|--------|-------------|------------|----------|-----|----------|-----|----|----|----|-----|-----|-----|-------|-------|-------|
| 198564 | Agilent38MB | 7:87175271 | missense | C/C | 1.11E-13 | 332 | 99 | 42 | 99 | 0/0 | 0/0 | 0/0 | match | match | match |
| 108971 | TruSeqV2    | 7:87175272 | synon    | G/G | 5.11E-15 | 175 | 99 | 34 | 84 | 0/0 | 0/0 | 0/0 | match | match | match |
| 115239 | TruSeqV2    | 7:87175272 | synon    | G/G | 6.66E-16 | 124 | 99 | 40 | 99 | 0/0 | 0/0 | 0/0 | match | match | match |
| 132306 | Agilent38MB | 7:87175272 | synon    | G/G | 1.11E-15 | 189 | 99 | 23 | 60 | 0/0 | 0/0 | 0/0 | match | match | match |
| 163383 | TruSeqV2    | 7:87175272 | synon    | G/G | 1.11E-15 | 151 | 99 | 34 | 85 | 0/0 | 0/0 | 0/0 | match | match | match |
| 198564 | Agilent38MB | 7:87175272 | synon    | G/G | 4.22E-15 | 329 | 99 | 42 | 99 | 0/0 | 0/0 | 0/0 | match | match | match |
| 108971 | TruSeqV2    | 7:87175289 | missense | G/G | 2.22E-16 | 182 | 99 | 35 | 96 | 0/0 | 0/0 | 0/0 | match | match | match |
| 115239 | TruSeqV2    | 7:87175289 | missense | G/G | 2.22E-16 | 124 | 99 | 42 | 99 | 0/0 | 0/0 | 0/0 | match | match | match |
| 132306 | Agilent38MB | 7:87175289 | missense | G/G | 2.22E-16 | 222 | 99 | 26 | 72 | 0/0 | 0/0 | 0/0 | match | match | match |
| 163383 | TruSeqV2    | 7:87175289 | missense | G/G | 2.22E-16 | 158 | 99 | 34 | 96 | 0/0 | 0/0 | 0/0 | match | match | match |
| 198564 | Agilent38MB | 7:87175289 | missense | G/G | 2.22E-16 | 354 | 99 | 44 | 99 | 0/0 | 0/0 | 0/0 | match | match | match |
| 108971 | TruSeqV2    | 7:87178626 | intronic | T/C | 8.88E-16 | 52  | 99 | 54 | 99 | 0/1 | 0/1 | 0/1 | match | match | match |
| 115239 | TruSeqV2    | 7:87178626 | intronic | T/C | 7.55E-15 | 34  | 99 | 54 | 99 | 0/1 | 0/1 | 0/1 | match | match | match |
| 132306 | Agilent38MB | 7:87178626 | intronic | C/C | 1.78E-15 | 50  | 99 | 40 | 96 | 0/0 | 0/0 | 0/0 | match | match | match |
| 163383 | TruSeqV2    | 7:87178626 | intronic | C/C | 4.00E-15 | 43  | 95 | 35 | 93 | 0/0 | 0/0 | 0/0 | match | match | match |
| 198564 | Agilent38MB | 7:87178626 | intronic | T/C | 3.55E-15 | 68  | 99 | 40 | 99 | 0/1 | 0/1 | 0/1 | match | match | match |
| 108971 | TruSeqV2    | 7:87178693 | missense | C/C | 2.22E-16 | 84  | 99 | 38 | 96 | 0/0 | 0/0 | 0/0 | match | match | match |
| 115239 | TruSeqV2    | 7:87178693 | missense | C/C | 2.22E-16 | 57  | 99 | 45 | 99 | 0/0 | 0/0 | 0/0 | match | match | match |
| 132306 | Agilent38MB | 7:87178693 | missense | C/C | 4.44E-16 | 149 | 99 | 31 | 60 | 0/0 | 0/0 | 0/0 | match | match | match |
| 163383 | TruSeqV2    | 7:87178693 | missense | C/C | 2.22E-16 | 79  | 99 | 43 | 99 | 0/0 | 0/0 | 0/0 | match | match | match |
| 198564 | Agilent38MB | 7:87178693 | missense | C/C | 2.22E-16 | 244 | 99 | 38 | 99 | 0/0 | 0/0 | 0/0 | match | match | match |
| 108971 | TruSeqV2    | 7:87178727 | synon    | C/C | 2.66E-15 | 102 | 99 | 31 | 78 | 0/0 | 0/0 | 0/0 | match | match | match |
| 115239 | TruSeqV2    | 7:87178727 | synon    | C/C | 4.44E-16 | 69  | 99 | 38 | 99 | 0/0 | 0/0 | 0/0 | match | match | match |
| 132306 | Agilent38MB | 7:87178727 | synon    | C/C | 3.11E-15 | 158 | 99 | 27 | 81 | 0/0 | 0/0 | 0/0 | match | match | match |
| 163383 | TruSeqV2    | 7:87178727 | synon    | C/C | 1.11E-15 | 87  | 99 | 39 | 99 | 0/0 | 0/0 | 0/0 | match | match | match |
| 198564 | Agilent38MB | 7:87178727 | synon    | C/C | 2.98E-14 | 291 | 99 | 33 | 81 | 0/0 | 0/0 | 0/0 | match | match | match |
| 108971 | TruSeqV2    | 7:87179143 | intronic | G/A | 1.53E-14 | 59  | 99 | 30 | 99 | 0/1 | 0/1 | 0/1 | match | match | match |
| 115239 | TruSeqV2    | 7:87179143 | intronic | G/A | 2.89E-15 | 49  | 99 | 29 | 99 | 0/1 | 0/1 | 0/1 | match | match | match |
| 132306 | Agilent38MB | 7:87179143 | intronic | A/A | 6.66E-16 | 222 | 99 | 32 | 87 | 0/0 | 0/0 | 0/0 | match | match | match |
| 163383 | TruSeqV2    | 7:87179143 | intronic | A/A | 7.99E-15 | 58  | 99 | 31 | 84 | 0/0 | 0/0 | 0/0 | match | match | match |
| 198564 | Agilent38MB | 7:87179143 | intronic | G/A | 4.00E-15 | 437 | 99 | 33 | 99 | 0/1 | 0/1 | 0/1 | match | match | match |
| 108971 | TruSeqV2    | 7:87179443 | intronic | G/G | 4.44E-16 | 123 | 99 | 41 | 99 | 0/0 | 0/0 | 0/0 | match | match | match |
| 115239 | TruSeqV2    | 7:87179443 | intronic | G/G | 2.22E-16 | 76  | 99 | 51 | 99 | 0/0 | 0/0 | 0/0 | match | match | match |
| 132306 | Agilent38MB | 7:87179443 | intronic | G/G | 2.22E-16 | 38  | 84 | 49 | 99 | 0/0 | 0/0 | 0/0 | match | match | match |
| 163383 | TruSeqV2    | 7:87179443 | intronic | G/A | 3.55E-15 | 114 | 99 | 33 | 99 | 0/1 | 0/1 | 0/1 | match | match | match |
| 198564 | Agilent38MB | 7:87179443 | intronic | G/G | 4.44E-16 | 74  | 99 | 40 | 90 | 0/0 | 0/0 | 0/0 | match | match | match |
| 108971 | TruSeqV2    | 7:87179601 | synon    | G/A | 1.11E-15 | 141 | 99 | 34 | 99 | 0/1 | 0/1 | 0/1 | match | match | match |
| 115239 | TruSeqV2    | 7:87179601 | synon    | G/A | 4.44E-16 | 81  | 99 | 31 | 99 | 0/1 | 0/1 | 0/1 | match | match | match |

|        |             |            |          |     |          |     |    |    |    |     |     |     |       |       |       |
|--------|-------------|------------|----------|-----|----------|-----|----|----|----|-----|-----|-----|-------|-------|-------|
| 132306 | Agilent38MB | 7:87179601 | synon    | A/A | 6.66E-16 | 93  | 99 | 24 | 66 | 0/0 | 0/0 | 0/0 | match | match | match |
| 163383 | TruSeqV2    | 7:87179601 | synon    | G/A | 6.66E-16 | 123 | 99 | 36 | 99 | 0/1 | 0/1 | 0/1 | match | match | match |
| 198564 | Agilent38MB | 7:87179601 | synon    | G/A | 6.66E-16 | 193 | 99 | 28 | 99 | 0/1 | 0/1 | 0/1 | match | match | match |
| 108971 | TruSeqV2    | 7:87179809 | missense | C/C | 2.22E-16 | 99  | 99 | 49 | 99 | 0/0 | 0/0 | 0/0 | match | match | match |
| 115239 | TruSeqV2    | 7:87179809 | missense | C/C | 4.44E-16 | 60  | 99 | 38 | 96 | 0/0 | 0/0 | 0/0 | match | match | match |
| 132306 | Agilent38MB | 7:87179809 | missense | C/C | 4.44E-16 | 140 | 99 | 43 | 99 | 0/0 | 0/0 | 0/0 | match | match | match |
| 163383 | TruSeqV2    | 7:87179809 | missense | C/C | 6.66E-16 | 83  | 99 | 35 | 96 | 0/0 | 0/0 | 0/0 | match | match | match |
| 198564 | Agilent38MB | 7:87179809 | missense | C/C | 2.66E-15 | 168 | 99 | 37 | 96 | 0/0 | 0/0 | 0/0 | match | match | match |
| 108971 | TruSeqV2    | 7:87180198 | intronic | T/C | 3.77E-15 | 24  | 99 | 37 | 99 | 0/1 | 0/1 | 0/1 | match | match | match |
| 115239 | TruSeqV2    | 7:87180198 | intronic | T/C | 1.55E-15 | 24  | 99 | 51 | 99 | 0/1 | 0/1 | 0/1 | match | match | match |
| 132306 | Agilent38MB | 7:87180198 | intronic | C/C | 1.78E-15 | 19  | 39 | 29 | 81 | 0/0 | 0/0 | 0/0 | match | match | match |
| 163383 | TruSeqV2    | 7:87180198 | intronic | T/C | 8.88E-16 | 25  | 99 | 32 | 99 | 0/1 | 0/1 | 0/1 | match | match | match |
| 198564 | Agilent38MB | 7:87180198 | intronic | T/C | 4.44E-16 | 20  | 99 | 36 | 99 | 0/1 | 0/1 | 0/1 | match | match | match |
| 108971 | TruSeqV2    | 7:87190668 | synon    | C/C | 7.46E-14 | 68  | 99 | 51 | 99 | 0/0 | 0/0 | 0/0 | match | match | match |
| 115239 | TruSeqV2    | 7:87190668 | synon    | C/C | 1.07E-14 | 48  | 99 | 43 | 99 | 0/0 | 0/0 | 0/0 | match | match | match |
| 132306 | Agilent38MB | 7:87190668 | synon    | C/C | 7.02E-13 | 35  | 66 | 38 | 99 | 0/0 | 0/0 | 0/0 | match | match | match |
| 163383 | TruSeqV2    | 7:87190668 | synon    | C/C | 2.00E-14 | 61  | 99 | 54 | 99 | 0/0 | 0/0 | 0/0 | match | match | match |
| 198564 | Agilent38MB | 7:87190668 | synon    | C/C | 6.73E-14 | 68  | 99 | 66 | 99 | 0/0 | 0/0 | 0/0 | match | match | match |
| 108971 | TruSeqV2    | 7:87190677 | synon    | T/T | 6.12E-08 | 60  | 99 | 49 | 99 | 0/0 | 0/0 | 0/0 | match | match | match |
| 115239 | TruSeqV2    | 7:87190677 | synon    | T/T | 3.64E-10 | 44  | 99 | 44 | 99 | 0/0 | 0/0 | 0/0 | match | match | match |
| 132306 | Agilent38MB | 7:87190677 | synon    | T/T | 3.85E-07 | 26  | 57 | 42 | 99 | 0/0 | 0/0 | 0/0 | match | match | match |
| 163383 | TruSeqV2    | 7:87190677 | synon    | T/T | 2.72E-11 | 59  | 99 | 58 | 99 | 0/0 | 0/0 | 0/0 | match | match | match |
| 198564 | Agilent38MB | 7:87190677 | synon    | T/T | 6.23E-09 | 49  | 99 | 59 | 99 | 0/0 | 0/0 | 0/0 | match | match | match |
| 108971 | TruSeqV2    | 7:87195533 | synon    | T/T | 1.11E-15 | 88  | 99 | 35 | 89 | 0/0 | 0/0 | 0/0 | match | match | match |
| 115239 | TruSeqV2    | 7:87195533 | synon    | T/T | 6.66E-16 | 65  | 99 | 49 | 99 | 0/0 | 0/0 | 0/0 | match | match | match |
| 132306 | Agilent38MB | 7:87195533 | synon    | T/T | 1.11E-15 | 164 | 99 | 23 | 60 | 0/0 | 0/0 | 0/0 | match | match | match |
| 163383 | TruSeqV2    | 7:87195533 | synon    | T/T | 8.88E-16 | 84  | 99 | 37 | 90 | 0/0 | 0/0 | 0/0 | match | match | match |
| 198564 | Agilent38MB | 7:87195533 | synon    | T/T | 4.00E-15 | 228 | 99 | 45 | 99 | 0/0 | 0/0 | 0/0 | match | match | match |
| 108971 | TruSeqV2    | 7:87195534 | synon    | C/C | 4.44E-16 | 85  | 99 | 35 | 99 | 0/0 | 0/0 | 0/0 | match | match | match |
| 115239 | TruSeqV2    | 7:87195534 | synon    | C/C | 6.66E-16 | 64  | 99 | 48 | 99 | 0/0 | 0/0 | 0/0 | match | match | match |
| 132306 | Agilent38MB | 7:87195534 | synon    | C/C | 2.22E-16 | 164 | 99 | 22 | 57 | 0/0 | 0/0 | 0/0 | match | match | match |
| 163383 | TruSeqV2    | 7:87195534 | synon    | C/C | 1.55E-15 | 78  | 99 | 37 | 90 | 0/0 | 0/0 | 0/0 | match | match | match |
| 198564 | Agilent38MB | 7:87195534 | synon    | C/C | 4.00E-15 | 224 | 99 | 45 | 99 | 0/0 | 0/0 | 0/0 | match | match | match |
| 108971 | TruSeqV2    | 7:87199564 | intronic | C/C | 1.84E-13 | 56  | 99 | 65 | 99 | 0/0 | 0/0 | 0/0 | match | match | match |
| 115239 | TruSeqV2    | 7:87199564 | intronic | C/A | 6.66E-16 | 27  | 99 | 46 | 99 | 0/1 | 0/1 | 0/1 | match | match | match |
| 132306 | Agilent38MB | 7:87199564 | intronic | C/C | 1.71E-11 | 127 | 99 | 48 | 99 | 0/0 | 0/0 | 0/0 | match | match | match |
| 163383 | TruSeqV2    | 7:87199564 | intronic | C/A | 1.78E-15 | 52  | 99 | 45 | 99 | 0/1 | 0/1 | 0/1 | match | match | match |
| 198564 | Agilent38MB | 7:87199564 | intronic | C/C | 2.35E-13 | 267 | 99 | 51 | 99 | 0/0 | 0/0 | 0/0 | match | match | match |

|        |             |            |          |     |          |     |    |    |    |     |     |     |       |       |       |
|--------|-------------|------------|----------|-----|----------|-----|----|----|----|-----|-----|-----|-------|-------|-------|
| 108971 | TruSeqV2    | 7:87214875 | missense | G/G | 2.22E-16 | 86  | 99 | 49 | 99 | 0/0 | 0/0 | 0/0 | match | match | match |
| 115239 | TruSeqV2    | 7:87214875 | missense | G/G | 4.44E-16 | 67  | 99 | 46 | 99 | 0/0 | 0/0 | 0/0 | match | match | match |
| 132306 | Agilent38MB | 7:87214875 | missense | G/G | 4.44E-16 | 70  | 99 | 32 | 81 | 0/0 | 0/0 | 0/0 | match | match | match |
| 163383 | TruSeqV2    | 7:87214875 | missense | G/G | 4.44E-16 | 73  | 99 | 32 | 78 | 0/0 | 0/0 | 0/0 | match | match | match |
| 198564 | Agilent38MB | 7:87214875 | missense | G/G | 6.66E-16 | 125 | 99 | 43 | 99 | 0/0 | 0/0 | 0/0 | match | match | match |
| 108971 | TruSeqV2    | 7:87214983 | missense | T/T | 8.88E-16 | 90  | 99 | 43 | 99 | 0/0 | 0/0 | 0/0 | match | match | match |
| 115239 | TruSeqV2    | 7:87214983 | missense | T/T | 4.44E-16 | 70  | 99 | 33 | 81 | 0/0 | 0/0 | 0/0 | match | match | match |
| 132306 | Agilent38MB | 7:87214983 | missense | T/T | 6.66E-16 | 41  | 90 | 39 | 99 | 0/0 | 0/0 | 0/0 | match | match | match |
| 163383 | TruSeqV2    | 7:87214983 | missense | T/T | 6.66E-16 | 68  | 99 | 39 | 96 | 0/0 | 0/0 | 0/0 | match | match | match |
| 198564 | Agilent38MB | 7:87214983 | missense | T/T | 1.55E-15 | 65  | 99 | 43 | 99 | 0/0 | 0/0 | 0/0 | match | match | match |
| 108971 | TruSeqV2    | 7:87229440 | missense | T/T | 4.44E-16 | 70  | 99 | 49 | 99 | 0/0 | 0/0 | 0/0 | match | match | match |
| 115239 | TruSeqV2    | 7:87229440 | missense | T/T | 4.44E-16 | 48  | 99 | 35 | 84 | 0/0 | 0/0 | 0/0 | match | match | match |
| 132306 | Agilent38MB | 7:87229440 | missense | T/T | 4.44E-16 | 59  | 99 | 31 | 69 | 0/0 | 0/0 | 0/0 | match | match | match |
| 163383 | TruSeqV2    | 7:87229440 | missense | T/T | 4.44E-16 | 82  | 99 | 41 | 99 | 0/0 | 0/0 | 0/0 | match | match | match |
| 198564 | Agilent38MB | 7:87229440 | missense | T/T | 2.89E-15 | 96  | 99 | 49 | 99 | 0/0 | 0/0 | 0/0 | match | match | match |
| 108971 | TruSeqV2    | 7:87229452 | missense | A/A | 3.11E-15 | 79  | 99 | 52 | 99 | 0/0 | 0/0 | 0/0 | match | match | match |
| 115239 | TruSeqV2    | 7:87229452 | missense | A/A | 6.66E-16 | 52  | 99 | 31 | 72 | 0/0 | 0/0 | 0/0 | match | match | match |
| 132306 | Agilent38MB | 7:87229452 | missense | A/A | 4.44E-16 | 77  | 99 | 27 | 72 | 0/0 | 0/0 | 0/0 | match | match | match |
| 163383 | TruSeqV2    | 7:87229452 | missense | A/A | 6.66E-16 | 96  | 99 | 42 | 93 | 0/0 | 0/0 | 0/0 | match | match | match |
| 198564 | Agilent38MB | 7:87229452 | missense | A/A | 6.00E-15 | 128 | 99 | 46 | 99 | 0/0 | 0/0 | 0/0 | match | match | match |
| 108971 | TruSeqV2    | 7:87229501 | 5'UTR    | C/C | 3.77E-15 | 128 | 99 | 42 | 99 | 1/1 | 1/1 | 1/1 | match | match | match |
| 115239 | TruSeqV2    | 7:87229501 | 5'UTR    | C/C | 4.44E-16 | 80  | 99 | 20 | 60 | 1/1 | 1/1 | 1/1 | match | match | match |
| 132306 | Agilent38MB | 7:87229501 | 5'UTR    | C/C | 6.66E-15 | 73  | 99 | 27 | 81 | 1/1 | 1/1 | 1/1 | match | match | match |
| 163383 | TruSeqV2    | 7:87229501 | 5'UTR    | C/C | 8.88E-16 | 125 | 99 | 35 | 99 | 1/1 | 1/1 | 1/1 | match | match | match |
| 198564 | Agilent38MB | 7:87229501 | 5'UTR    | C/C | 2.22E-16 | 143 | 99 | 44 | 99 | 1/1 | 1/1 | 1/1 | match | match | match |
| 108971 | TruSeqV2    | 7:87230193 | 5'UTR    | A/A | 8.88E-16 | 135 | 99 | 34 | 93 | 0/0 | 0/0 | 0/0 | match | match | match |
| 115239 | TruSeqV2    | 7:87230193 | 5'UTR    | A/A | 4.44E-16 | 69  | 99 | 20 | 57 | 0/0 | 0/0 | 0/0 | match | match | match |
| 132306 | Agilent38MB | 7:87230193 | 5'UTR    | A/A | 6.66E-16 | 1   | 3  | 38 | 99 | 0/0 | 0/0 | 0/0 | match | match | match |
| 163383 | TruSeqV2    | 7:87230193 | 5'UTR    | A/A | 4.44E-16 | 99  | 99 | 41 | 99 | 0/0 | 0/0 | 0/0 | match | match | match |
| 108971 | TruSeqV2    | 7:91670136 | missense | G/G | 4.00E-15 | 232 | 99 | 44 | 99 | 0/0 | 0/0 | 0/0 | match | match | match |
| 115239 | TruSeqV2    | 7:91670136 | missense | G/G | 6.08E-14 | 180 | 99 | 47 | 99 | 0/0 | 0/0 | 0/0 | match | match | match |
| 132306 | Agilent38MB | 7:91670136 | missense | G/G | 1.11E-15 | 119 | 99 | 34 | 90 | 0/0 | 0/0 | 0/0 | match | match | match |
| 163383 | TruSeqV2    | 7:91670136 | missense | G/G | 6.66E-16 | 205 | 99 | 49 | 99 | 0/0 | 0/0 | 0/0 | match | match | match |
| 198564 | Agilent38MB | 7:91670136 | missense | G/G | 1.33E-15 | 228 | 99 | 35 | 99 | 0/0 | 0/0 | 0/0 | match | match | match |
| 108971 | TruSeqV2    | 7:91736794 | intronic | A/T | 5.11E-15 | 66  | 99 | 54 | 99 | 0/1 | 0/1 | 0/1 | match | match | match |
| 115239 | TruSeqV2    | 7:91736794 | intronic | A/T | 1.49E-14 | 28  | 99 | 56 | 99 | 0/1 | 0/1 | 0/1 | match | match | match |
| 132306 | Agilent38MB | 7:91736794 | intronic | A/T | 6.22E-15 | 14  | 99 | 43 | 99 | 0/1 | 0/1 | 0/1 | match | match | match |
| 163383 | TruSeqV2    | 7:91736794 | intronic | A/T | 1.91E-14 | 62  | 99 | 56 | 99 | 0/1 | 0/1 | 0/1 | match | match | match |

|        |             |            |           |     |          |     |    |    |    |     |     |     |       |       |       |
|--------|-------------|------------|-----------|-----|----------|-----|----|----|----|-----|-----|-----|-------|-------|-------|
| 198564 | Agilent38MB | 7:91736794 | intronic  | A/T | 6.86E-14 | 18  | 99 | 36 | 99 | 0/1 | 0/1 | 0/1 | match | match | match |
| 108971 | TruSeqV2    | 7:91742728 | 3'UTR     | G/C | 1.55E-14 | 117 | 99 | 52 | 99 | 0/1 | 0/1 | 0/1 | match | match | match |
| 115239 | TruSeqV2    | 7:91742728 | 3'UTR     | G/C | 7.77E-15 | 71  | 99 | 35 | 99 | 0/1 | 0/1 | 0/1 | match | match | match |
| 163383 | TruSeqV2    | 7:91742728 | 3'UTR     | G/C | 3.79E-12 | 124 | 99 | 46 | 99 | 0/1 | 0/1 | 0/1 | match | match | match |
| 108971 | TruSeqV2    | 7:91743150 | synon     | G/A | 2.17E-13 | 86  | 99 | 47 | 99 | 0/1 | 0/1 | 0/1 | match | match | match |
| 115239 | TruSeqV2    | 7:91743150 | synon     | G/A | 5.08E-14 | 43  | 99 | 39 | 99 | 0/1 | 0/1 | 0/1 | match | match | match |
| 132306 | Agilent38MB | 7:91743150 | synon     | G/A | 2.00E-15 | 29  | 99 | 31 | 99 | 0/1 | 0/1 | 0/1 | match | match | match |
| 163383 | TruSeqV2    | 7:91743150 | synon     | G/A | 1.64E-14 | 72  | 99 | 35 | 99 | 0/1 | 0/1 | 0/1 | match | match | match |
| 198564 | Agilent38MB | 7:91743150 | synon     | G/A | 4.71E-14 | 48  | 99 | 55 | 99 | 0/1 | 0/1 | 0/1 | match | match | match |
| 108971 | TruSeqV2    | 7:91746400 | missense  | G/G | 2.22E-16 | 122 | 99 | 45 | 99 | 0/0 | 0/0 | 0/0 | match | match | match |
| 115239 | TruSeqV2    | 7:91746400 | missense  | G/G | 2.22E-16 | 80  | 99 | 48 | 99 | 0/0 | 0/0 | 0/0 | match | match | match |
| 132306 | Agilent38MB | 7:91746400 | missense  | G/G | 2.22E-16 | 114 | 99 | 42 | 99 | 0/0 | 0/0 | 0/0 | match | match | match |
| 163383 | TruSeqV2    | 7:91746400 | missense  | G/G | 2.22E-16 | 105 | 99 | 37 | 99 | 0/0 | 0/0 | 0/0 | match | match | match |
| 198564 | Agilent38MB | 7:91746400 | missense  | G/G | 4.44E-16 | 189 | 99 | 47 | 99 | 0/0 | 0/0 | 0/0 | match | match | match |
| 108971 | TruSeqV2    | 7:91753050 | synon     | G/G | 4.44E-16 | 54  | 99 | 58 | 99 | 0/0 | 0/0 | 0/0 | match | match | match |
| 115239 | TruSeqV2    | 7:91753050 | synon     | G/G | 4.44E-16 | 39  | 99 | 49 | 99 | 0/0 | 0/0 | 0/0 | match | match | match |
| 132306 | Agilent38MB | 7:91753050 | synon     | G/G | 1.11E-15 | 101 | 99 | 38 | 99 | 0/0 | 0/0 | 0/0 | match | match | match |
| 163383 | TruSeqV2    | 7:91753050 | synon     | G/G | 2.22E-16 | 58  | 99 | 50 | 99 | 0/0 | 0/0 | 0/0 | match | match | match |
| 198564 | Agilent38MB | 7:91753050 | synon     | G/G | 8.88E-16 | 200 | 99 | 51 | 99 | 0/0 | 0/0 | 0/0 | match | match | match |
| 108971 | TruSeqV2    | 7:91756859 | synon     | T/T | 1.11E-15 | 94  | 99 | 55 | 99 | 0/0 | 0/0 | 0/0 | match | match | match |
| 115239 | TruSeqV2    | 7:91756859 | synon     | T/T | 4.44E-16 | 54  | 99 | 36 | 90 | 0/0 | 0/0 | 0/0 | match | match | match |
| 132306 | Agilent38MB | 7:91756859 | synon     | T/T | 6.66E-16 | 27  | 37 | 38 | 99 | 0/0 | 0/0 | 0/0 | match | match | match |
| 163383 | TruSeqV2    | 7:91756859 | synon     | T/T | 6.66E-16 | 82  | 99 | 38 | 99 | 0/0 | 0/0 | 0/0 | match | match | match |
| 198564 | Agilent38MB | 7:91756859 | synon     | T/T | 3.33E-15 | 54  | 99 | 42 | 99 | 0/0 | 0/0 | 0/0 | match | match | match |
| 108971 | TruSeqV2    | 7:91763623 | missense  | A/A | 6.66E-16 | 62  | 99 | 14 | 39 | 0/0 | 0/0 | 0/0 | match | match | match |
| 115239 | TruSeqV2    | 7:91763623 | missense  | A/A | 8.88E-16 | 32  | 87 | 8  | 21 | 0/0 | 0/0 | 0/0 | match | match | match |
| 132306 | Agilent38MB | 7:91763623 | missense  | A/A | 3.82E-14 | 27  | 66 | 24 | 58 | 0/0 | 0/0 | 0/0 | match | match | match |
| 163383 | TruSeqV2    | 7:91763623 | missense  | A/A | 1.42E-14 | 29  | 68 | 14 | 39 | 0/0 | 0/0 | 0/0 | match | match | match |
| 198564 | Agilent38MB | 7:91763623 | missense  | A/A | 2.22E-16 | 17  | 45 | 22 | 49 | 0/0 | 0/0 | 0/0 | match | match | match |
| 108971 | TruSeqV2    | 7:94925304 | 3'UTR     | C/C | 1.22E-14 | 83  | 99 | 41 | 99 | 0/0 | 0/0 | 0/0 | match | match | match |
| 115239 | TruSeqV2    | 7:94925304 | 3'UTR     | C/C | 4.02E-14 | 47  | 99 | 48 | 99 | 0/0 | 0/0 | 0/0 | match | match | match |
| 163383 | TruSeqV2    | 7:94925304 | 3'UTR     | C/C | 2.00E-15 | 60  | 99 | 54 | 99 | 0/0 | 0/0 | 0/0 | match | match | match |
| 108971 | TruSeqV2    | 7:94931591 | stop/miss | G/G | 7.89E-12 | 160 | 99 | 50 | 99 | 0/0 | 0/0 | 0/0 | match | match | match |
| 115239 | TruSeqV2    | 7:94931591 | stop/miss | G/G | 1.35E-14 | 160 | 99 | 50 | 99 | 0/0 | 0/0 | 0/0 | match | match | match |
| 132306 | Agilent38MB | 7:94931591 | stop/miss | G/G | 1.08E-11 | 160 | 99 | 50 | 99 | 0/0 | 0/0 | 0/0 | match | match | match |
| 163383 | TruSeqV2    | 7:94931591 | stop/miss | G/G | 1.18E-13 | 160 | 99 | 50 | 99 | 0/0 | 0/0 | 0/0 | match | match | match |
| 198564 | Agilent38MB | 7:94931591 | stop/miss | G/G | 3.75E-11 | 160 | 99 | 50 | 99 | 0/0 | 0/0 | 0/0 | match | match | match |
| 108971 | TruSeqV2    | 7:94937439 | stop      | C/C | 4.00E-09 | 153 | 99 | 33 | 99 | 0/0 | 0/0 | 0/0 | match | match | match |

|        |             |            |          |     |          |     |    |    |    |     |     |     |       |       |       |
|--------|-------------|------------|----------|-----|----------|-----|----|----|----|-----|-----|-----|-------|-------|-------|
| 115239 | TruSeqV2    | 7:94937439 | stop     | C/C | 1.81E-09 | 110 | 99 | 41 | 99 | 0/0 | 0/0 | 0/0 | match | match | match |
| 132306 | Agilent38MB | 7:94937439 | stop     | C/C | 2.45E-10 | 130 | 99 | 24 | 66 | 0/0 | 0/0 | 0/0 | match | match | match |
| 163383 | TruSeqV2    | 7:94937439 | stop     | C/C | 4.94E-07 | 148 | 99 | 29 | 72 | 0/0 | 0/0 | 0/0 | match | match | match |
| 198564 | Agilent38MB | 7:94937439 | stop     | C/C | 3.23E-09 | 220 | 99 | 36 | 93 | 0/0 | 0/0 | 0/0 | match | match | match |
| 108971 | TruSeqV2    | 7:94946084 | missense | T/T | 4.91E-14 | 77  | 99 | 53 | 99 | 1/1 | 1/1 | 1/1 | match | match | match |
| 115239 | TruSeqV2    | 7:94946084 | missense | A/A | 6.66E-16 | 60  | 99 | 42 | 99 | 0/0 | 0/0 | 0/0 | match | match | match |
| 132306 | Agilent38MB | 7:94946084 | missense | A/A | 7.59E-14 | 71  | 99 | 31 | 81 | 0/0 | 0/0 | 0/0 | match | match | match |
| 163383 | TruSeqV2    | 7:94946084 | missense | T/A | 2.89E-15 | 86  | 99 | 35 | 99 | 0/1 | 0/1 | 0/1 | match | match | match |
| 198564 | Agilent38MB | 7:94946084 | missense | A/A | 1.47E-14 | 133 | 99 | 41 | 99 | 0/0 | 0/0 | 0/0 | match | match | match |
| 108971 | TruSeqV2    | 7:94993261 | synon    | A/A | 2.22E-16 | 82  | 99 | 55 | 99 | 0/0 | 0/0 | 0/0 | match | match | match |
| 115239 | TruSeqV2    | 7:94993261 | synon    | A/A | 2.22E-16 | 63  | 99 | 47 | 99 | 0/0 | 0/0 | 0/0 | match | match | match |
| 132306 | Agilent38MB | 7:94993261 | synon    | A/A | 8.88E-16 | 85  | 99 | 35 | 93 | 0/0 | 0/0 | 0/0 | match | match | match |
| 163383 | TruSeqV2    | 7:94993261 | synon    | A/A | 2.22E-16 | 50  | 99 | 51 | 99 | 0/0 | 0/0 | 0/0 | match | match | match |
| 198564 | Agilent38MB | 7:94993261 | synon    | A/A | 8.88E-16 | 181 | 99 | 55 | 99 | 0/0 | 0/0 | 0/0 | match | match | match |
| 108971 | TruSeqV2    | 7:95025600 | synon    | G/A | 2.23E-12 | 18  | 99 | 11 | 39 | 0/1 | 0/1 | 0/1 | match | match | match |
| 115239 | TruSeqV2    | 7:95025600 | synon    | G/G | 5.77E-15 | 12  | 0  | 16 | 39 | 0/0 | 0/0 | 0/0 | match | match | match |
| 132306 | Agilent38MB | 7:95025600 | synon    | G/G | 1.78E-15 | 64  | 99 | 11 | 24 | 0/0 | 0/0 | 0/0 | match | match | match |
| 163383 | TruSeqV2    | 7:95025600 | synon    | G/G | 3.11E-15 | 5   | 15 | 13 | 25 | 0/0 | 0/0 | 0/0 | match | match | match |
| 198564 | Agilent38MB | 7:95025600 | synon    | A/A | 1.18E-14 | 67  | 99 | 13 | 39 | 1/1 | 1/1 | 1/1 | match | match | match |
| 132306 | Agilent38MB | 7:95026327 | promoter | A/A | 1.11E-15 | 2   | 6  | 41 | 99 | 0/0 | 0/0 | 0/0 | match | match | match |
| 198564 | Agilent38MB | 7:95026327 | promoter | G/G | 3.13E-14 | 3   | 9  | 34 | 79 | 1/1 | 1/1 | 1/1 | match | match | match |
| 132306 | Agilent38MB | 7:95026408 | promoter | G/G | 2.89E-15 | 2   | 6  | 39 | 99 | 0/0 | 0/0 | 0/0 | match | match | match |
| 132306 | Agilent38MB | 7:95026456 | promoter | G/G | 4.00E-15 | 2   | 6  | 35 | 99 | 0/0 | 0/0 | 0/0 | match | match | match |
| 198564 | Agilent38MB | 7:95026456 | promoter | G/G | 1.38E-13 | 2   | 3  | 47 | 99 | 0/0 | 0/0 | 0/0 | match | match | match |
| 108971 | TruSeqV2    | 7:95034036 | 3'UTR    | A/A | 2.44E-15 | 4   | 12 | 52 | 99 | 0/0 | 0/0 | 0/0 | match | match | match |
| 115239 | TruSeqV2    | 7:95034036 | 3'UTR    | A/A | 6.66E-16 | 8   | 18 | 45 | 99 | 0/0 | 0/0 | 0/0 | match | match | match |
| 163383 | TruSeqV2    | 7:95034036 | 3'UTR    | A/A | 1.11E-15 | 6   | 18 | 49 | 99 | 0/0 | 0/0 | 0/0 | match | match | match |
| 198564 | Agilent38MB | 7:95034036 | 3'UTR    | A/A | 1.87E-13 | 2   | 6  | 38 | 99 | 0/0 | 0/0 | 0/0 | match | match | match |
| 108971 | TruSeqV2    | 7:95041718 | synon    | T/T | 2.44E-15 | 83  | 99 | 40 | 99 | 0/0 | 0/0 | 0/0 | match | match | match |
| 115239 | TruSeqV2    | 7:95041718 | synon    | T/T | 8.88E-16 | 60  | 99 | 41 | 99 | 0/0 | 0/0 | 0/0 | match | match | match |
| 132306 | Agilent38MB | 7:95041718 | synon    | T/T | 1.33E-15 | 90  | 99 | 40 | 99 | 0/0 | 0/0 | 0/0 | match | match | match |
| 163383 | TruSeqV2    | 7:95041718 | synon    | T/T | 1.78E-15 | 76  | 99 | 38 | 99 | 0/0 | 0/0 | 0/0 | match | match | match |
| 198564 | Agilent38MB | 7:95041718 | synon    | T/T | 4.44E-16 | 125 | 99 | 41 | 99 | 0/0 | 0/0 | 0/0 | match | match | match |
| 108971 | TruSeqV2    | 7:95053880 | missense | G/G | 8.22E-15 | 37  | 99 | 51 | 99 | 0/0 | 0/0 | 0/0 | match | match | match |
| 115239 | TruSeqV2    | 7:95053880 | missense | G/G | 2.22E-16 | 22  | 60 | 44 | 99 | 0/0 | 0/0 | 0/0 | match | match | match |
| 132306 | Agilent38MB | 7:95053880 | missense | G/G | 2.22E-16 | 96  | 99 | 33 | 93 | 0/0 | 0/0 | 0/0 | match | match | match |
| 163383 | TruSeqV2    | 7:95053880 | missense | G/G | 2.22E-16 | 39  | 99 | 46 | 99 | 0/0 | 0/0 | 0/0 | match | match | match |
| 198564 | Agilent38MB | 7:95053880 | missense | G/G | 4.44E-16 | 150 | 99 | 34 | 93 | 0/0 | 0/0 | 0/0 | match | match | match |

|        |             |            |          |     |          |     |    |    |    |     |     |     |       |       |       |
|--------|-------------|------------|----------|-----|----------|-----|----|----|----|-----|-----|-----|-------|-------|-------|
| 115239 | TruSeqV2    | 7:95064821 | promoter | C/C | 6.66E-16 | 1   | 3  | 23 | 51 | 0/0 | 0/0 | 0/0 | match | match | match |
| 108971 | TruSeqV2    | 7:99245974 | missense | A/A | 8.88E-16 | 89  | 99 | 55 | 99 | 0/0 | 0/0 | 0/0 | match | match | match |
| 115239 | TruSeqV2    | 7:99245974 | missense | A/A | 4.44E-16 | 44  | 99 | 56 | 99 | 0/0 | 0/0 | 0/0 | match | match | match |
| 132306 | Agilent38MB | 7:99245974 | missense | A/A | 4.44E-16 | 100 | 99 | 49 | 99 | 0/0 | 0/0 | 0/0 | match | match | match |
| 163383 | TruSeqV2    | 7:99245974 | missense | A/A | 4.44E-16 | 82  | 99 | 38 | 99 | 0/0 | 0/0 | 0/0 | match | match | match |
| 198564 | Agilent38MB | 7:99245974 | missense | A/A | 6.66E-16 | 155 | 99 | 39 | 96 | 0/0 | 0/0 | 0/0 | match | match | match |
| 108971 | TruSeqV2    | 7:99247772 | missense | A/A | 2.22E-16 | 112 | 99 | 34 | 87 | 0/0 | 0/0 | 0/0 | match | match | match |
| 115239 | TruSeqV2    | 7:99247772 | missense | A/A | 2.22E-16 | 62  | 99 | 32 | 81 | 0/0 | 0/0 | 0/0 | match | match | match |
| 132306 | Agilent38MB | 7:99247772 | missense | A/A | 4.44E-16 | 295 | 99 | 37 | 99 | 0/0 | 0/0 | 0/0 | match | match | match |
| 163383 | TruSeqV2    | 7:99247772 | missense | A/A | 2.22E-16 | 114 | 99 | 44 | 99 | 0/0 | 0/0 | 0/0 | match | match | match |
| 198564 | Agilent38MB | 7:99247772 | missense | A/A | 8.88E-16 | 512 | 99 | 42 | 97 | 0/0 | 0/0 | 0/0 | match | match | match |
| 108971 | TruSeqV2    | 7:99250236 | missense | G/G | 2.22E-16 | 72  | 99 | 34 | 87 | 0/0 | 0/0 | 0/0 | match | match | match |
| 115239 | TruSeqV2    | 7:99250236 | missense | G/G | 4.44E-16 | 38  | 93 | 36 | 99 | 0/0 | 0/0 | 0/0 | match | match | match |
| 132306 | Agilent38MB | 7:99250236 | missense | G/G | 2.22E-16 | 154 | 99 | 42 | 99 | 0/0 | 0/0 | 0/0 | match | match | match |
| 163383 | TruSeqV2    | 7:99250236 | missense | G/G | 4.44E-16 | 40  | 99 | 39 | 99 | 0/0 | 0/0 | 0/0 | match | match | match |
| 198564 | Agilent38MB | 7:99250236 | missense | G/G | 6.64E-14 | 329 | 99 | 45 | 99 | 0/0 | 0/0 | 0/0 | match | match | match |
| 108971 | TruSeqV2    | 7:99250393 | fs       | T/T | 2.22E-16 | 45  | 99 | 46 | 99 | 0/0 | 0/0 | 0/0 | match | match | match |
| 115239 | TruSeqV2    | 7:99250393 | fs       | T/T | 2.22E-16 | 45  | 99 | 46 | 99 | 0/0 | 0/0 | 0/0 | match | match | match |
| 132306 | Agilent38MB | 7:99250393 | fs       | T/T | 2.00E-15 | 45  | 99 | 46 | 99 | 0/0 | 0/0 | 0/0 | match | match | match |
| 163383 | TruSeqV2    | 7:99250393 | fs       | T/T | 2.22E-16 | 45  | 99 | 46 | 99 | 0/0 | 0/0 | 0/0 | match | match | match |
| 198564 | Agilent38MB | 7:99250393 | fs       | T/T | 2.22E-16 | 45  | 99 | 46 | 99 | 0/0 | 0/0 | 0/0 | match | match | match |
| 108971 | TruSeqV2    | 7:99258139 | missense | C/C | 2.22E-16 | 122 | 99 | 33 | 90 | 0/0 | 0/0 | 0/0 | match | match | match |
| 115239 | TruSeqV2    | 7:99258139 | missense | C/C | 2.22E-16 | 66  | 99 | 32 | 84 | 0/0 | 0/0 | 0/0 | match | match | match |
| 132306 | Agilent38MB | 7:99258139 | missense | C/C | 2.22E-16 | 48  | 99 | 29 | 69 | 0/0 | 0/0 | 0/0 | match | match | match |
| 163383 | TruSeqV2    | 7:99258139 | missense | C/C | 2.22E-16 | 100 | 99 | 30 | 75 | 0/0 | 0/0 | 0/0 | match | match | match |
| 198564 | Agilent38MB | 7:99258139 | missense | C/C | 8.88E-16 | 73  | 99 | 26 | 60 | 0/0 | 0/0 | 0/0 | match | match | match |
| 108971 | TruSeqV2    | 7:99262835 | synon    | C/C | 8.88E-16 | 151 | 99 | 48 | 99 | 0/0 | 0/0 | 0/0 | match | match | match |
| 115239 | TruSeqV2    | 7:99262835 | synon    | C/C | 1.55E-15 | 99  | 99 | 49 | 99 | 0/0 | 0/0 | 0/0 | match | match | match |
| 132306 | Agilent38MB | 7:99262835 | synon    | C/C | 1.11E-15 | 93  | 99 | 31 | 87 | 0/0 | 0/0 | 0/0 | match | match | match |
| 163383 | TruSeqV2    | 7:99262835 | synon    | C/C | 1.55E-15 | 139 | 99 | 42 | 99 | 0/0 | 0/0 | 0/0 | match | match | match |
| 198564 | Agilent38MB | 7:99262835 | synon    | C/C | 1.78E-15 | 168 | 99 | 44 | 99 | 0/0 | 0/0 | 0/0 | match | match | match |
| 108971 | TruSeqV2    | 7:99262860 | missense | T/T | 4.44E-16 | 190 | 99 | 48 | 99 | 0/0 | 0/0 | 0/0 | match | match | match |
| 115239 | TruSeqV2    | 7:99262860 | missense | T/T | 2.22E-16 | 128 | 99 | 44 | 99 | 0/0 | 0/0 | 0/0 | match | match | match |
| 132306 | Agilent38MB | 7:99262860 | missense | T/T | 2.22E-16 | 136 | 99 | 32 | 81 | 0/0 | 0/0 | 0/0 | match | match | match |
| 163383 | TruSeqV2    | 7:99262860 | missense | T/T | 2.22E-16 | 188 | 99 | 36 | 84 | 0/0 | 0/0 | 0/0 | match | match | match |
| 198564 | Agilent38MB | 7:99262860 | missense | T/T | 2.22E-16 | 260 | 99 | 48 | 99 | 0/0 | 0/0 | 0/0 | match | match | match |
| 108971 | TruSeqV2    | 7:99264573 | splice   | A/A | 6.66E-16 | 56  | 99 | 33 | 86 | 0/0 | 0/0 | 0/0 | match | match | match |
| 115239 | TruSeqV2    | 7:99264573 | splice   | A/A | 8.88E-16 | 44  | 99 | 38 | 99 | 0/0 | 0/0 | 0/0 | match | match | match |

|        |             |            |          |     |          |     |    |    |    |     |     |     |       |       |       |
|--------|-------------|------------|----------|-----|----------|-----|----|----|----|-----|-----|-----|-------|-------|-------|
| 132306 | Agilent38MB | 7:99264573 | splice   | A/A | 4.44E-16 | 55  | 99 | 30 | 90 | 0/0 | 0/0 | 0/0 | match | match | match |
| 163383 | TruSeqV2    | 7:99264573 | splice   | A/A | 1.55E-15 | 56  | 99 | 27 | 75 | 0/0 | 0/0 | 0/0 | match | match | match |
| 198564 | Agilent38MB | 7:99264573 | splice   | A/A | 2.22E-15 | 109 | 99 | 33 | 93 | 0/0 | 0/0 | 0/0 | match | match | match |
| 108971 | TruSeqV2    | 7:99270222 | missense | G/G | 1.55E-15 | 94  | 99 | 50 | 99 | 0/0 | 0/0 | 0/0 | match | match | match |
| 115239 | TruSeqV2    | 7:99270222 | missense | G/G | 4.44E-15 | 49  | 99 | 37 | 96 | 0/0 | 0/0 | 0/0 | match | match | match |
| 132306 | Agilent38MB | 7:99270222 | missense | G/G | 8.88E-16 | 357 | 99 | 31 | 87 | 0/0 | 0/0 | 0/0 | match | match | match |
| 163383 | TruSeqV2    | 7:99270222 | missense | G/G | 3.06E-14 | 75  | 99 | 46 | 99 | 0/0 | 0/0 | 0/0 | match | match | match |
| 198564 | Agilent38MB | 7:99270222 | missense | G/G | 1.24E-13 | 569 | 99 | 42 | 99 | 0/0 | 0/0 | 0/0 | match | match | match |
| 108971 | TruSeqV2    | 7:99270276 | missense | A/A | 1.29E-14 | 117 | 99 | 34 | 93 | 0/0 | 0/0 | 0/0 | match | match | match |
| 115239 | TruSeqV2    | 7:99270276 | missense | A/A | 7.55E-15 | 57  | 99 | 37 | 96 | 0/0 | 0/0 | 0/0 | match | match | match |
| 132306 | Agilent38MB | 7:99270276 | missense | A/A | 2.22E-16 | 393 | 99 | 33 | 96 | 0/0 | 0/0 | 0/0 | match | match | match |
| 163383 | TruSeqV2    | 7:99270276 | missense | A/A | 2.22E-16 | 92  | 99 | 38 | 99 | 0/0 | 0/0 | 0/0 | match | match | match |
| 198564 | Agilent38MB | 7:99270276 | missense | A/A | 2.44E-15 | 720 | 99 | 39 | 99 | 0/0 | 0/0 | 0/0 | match | match | match |
| 108971 | TruSeqV2    | 7:99270539 | splice   | C/C | 1.23E-12 | 5   | 9  | 57 | 99 | 0/0 | 0/0 | 0/0 | match | match | match |
| 115239 | TruSeqV2    | 7:99270539 | splice   | C/C | 8.44E-15 | 3   | 9  | 42 | 41 | 0/0 | 0/0 | 0/0 | match | match | match |
| 132306 | Agilent38MB | 7:99270539 | splice   | C/C | 4.66E-15 | 1   | 3  | 41 | 99 | 0/0 | 0/0 | 0/0 | match | match | match |
| 163383 | TruSeqV2    | 7:99270539 | splice   | C/C | 1.11E-15 | 5   | 12 | 38 | 99 | 0/0 | 0/0 | 0/0 | match | match | match |
| 108971 | TruSeqV2    | 7:99273745 | missense | T/T | 4.44E-16 | 156 | 99 | 43 | 99 | 0/0 | 0/0 | 0/0 | match | match | match |
| 115239 | TruSeqV2    | 7:99273745 | missense | T/T | 2.44E-15 | 112 | 99 | 33 | 93 | 0/0 | 0/0 | 0/0 | match | match | match |
| 132306 | Agilent38MB | 7:99273745 | missense | T/T | 8.88E-16 | 159 | 99 | 33 | 78 | 0/0 | 0/0 | 0/0 | match | match | match |
| 163383 | TruSeqV2    | 7:99273745 | missense | T/T | 6.66E-16 | 124 | 99 | 45 | 99 | 0/0 | 0/0 | 0/0 | match | match | match |
| 198564 | Agilent38MB | 7:99273745 | missense | T/T | 3.33E-15 | 202 | 99 | 44 | 99 | 0/0 | 0/0 | 0/0 | match | match | match |
| 108971 | TruSeqV2    | 7:99273815 | missense | G/G | 9.99E-15 | 119 | 99 | 46 | 99 | 0/0 | 0/0 | 0/0 | match | match | match |
| 115239 | TruSeqV2    | 7:99273815 | missense | G/G | 2.22E-15 | 93  | 99 | 54 | 99 | 0/0 | 0/0 | 0/0 | match | match | match |
| 132306 | Agilent38MB | 7:99273815 | missense | G/G | 2.22E-16 | 130 | 99 | 26 | 69 | 0/0 | 0/0 | 0/0 | match | match | match |
| 163383 | TruSeqV2    | 7:99273815 | missense | G/G | 1.11E-15 | 98  | 99 | 43 | 99 | 0/0 | 0/0 | 0/0 | match | match | match |
| 198564 | Agilent38MB | 7:99273815 | missense | G/G | 3.11E-15 | 232 | 99 | 44 | 99 | 0/0 | 0/0 | 0/0 | match | match | match |
| 108971 | TruSeqV2    | 7:99273821 | missense | G/G | 4.44E-16 | 114 | 99 | 47 | 99 | 0/0 | 0/0 | 0/0 | match | match | match |
| 115239 | TruSeqV2    | 7:99273821 | missense | G/G | 2.22E-16 | 91  | 99 | 51 | 99 | 0/0 | 0/0 | 0/0 | match | match | match |
| 132306 | Agilent38MB | 7:99273821 | missense | G/G | 8.88E-16 | 108 | 99 | 31 | 78 | 0/0 | 0/0 | 0/0 | match | match | match |
| 163383 | TruSeqV2    | 7:99273821 | missense | G/G | 1.78E-15 | 93  | 99 | 40 | 99 | 0/0 | 0/0 | 0/0 | match | match | match |
| 198564 | Agilent38MB | 7:99273821 | missense | G/G | 1.33E-15 | 203 | 99 | 44 | 99 | 0/0 | 0/0 | 0/0 | match | match | match |
| 108971 | TruSeqV2    | 7:99306685 | missense | G/G | 4.44E-16 | 47  | 99 | 46 | 99 | 1/1 | 1/1 | 1/1 | match | match | match |
| 115239 | TruSeqV2    | 7:99306685 | missense | G/G | 4.44E-16 | 24  | 72 | 27 | 39 | 1/1 | 1/1 | 1/1 | match | match | match |
| 132306 | Agilent38MB | 7:99306685 | missense | G/C | 7.52E-06 | 201 | 99 | 33 | 99 | 0/1 | 0/1 | 0/1 | match | match | match |
| 163383 | TruSeqV2    | 7:99306685 | missense | G/G | 2.22E-16 | 45  | 99 | 33 | 99 | 1/1 | 1/1 | 1/1 | match | match | match |
| 198564 | Agilent38MB | 7:99306685 | missense | G/G | 1.78E-15 | 314 | 99 | 40 | 99 | 1/1 | 1/1 | 1/1 | match | match | match |
| 108971 | TruSeqV2    | 7:99332765 | 5'UTR    | C/C | 1.44E-12 | 182 | 99 | 44 | 99 | 0/0 | 0/0 | 0/0 | match | match | match |

|        |             |            |          |     |             |     |    |    |    |     |     |     |       |       |       |
|--------|-------------|------------|----------|-----|-------------|-----|----|----|----|-----|-----|-----|-------|-------|-------|
| 115239 | TruSeqV2    | 7:99332765 | 5'UTR    | C/C | 1.15E-14    | 121 | 99 | 22 | 63 | 0/0 | 0/0 | 0/0 | match | match | match |
| 132306 | Agilent38MB | 7:99332765 | 5'UTR    | C/C | 2.91E-13    | 4   | 12 | 39 | 99 | 0/0 | 0/0 | 0/0 | match | match | match |
| 163383 | TruSeqV2    | 7:99332765 | 5'UTR    | C/C | 1.29E-14    | 132 | 99 | 45 | 99 | 0/0 | 0/0 | 0/0 | match | match | match |
| 198564 | Agilent38MB | 7:99332765 | 5'UTR    | C/C | 8.68E-14    | 11  | 24 | 34 | 86 | 0/0 | 0/0 | 0/0 | match | match | match |
| 108971 | TruSeqV2    | 7:99332807 | 5'UTR    | C/C | 2.71E-14    | 146 | 99 | 36 | 96 | 0/0 | 0/0 | 0/0 | match | match | match |
| 115239 | TruSeqV2    | 7:99332807 | 5'UTR    | C/C | 1.55E-15    | 110 | 99 | 20 | 51 | 0/0 | 0/0 | 0/0 | match | match | match |
| 163383 | TruSeqV2    | 7:99332807 | 5'UTR    | C/C | 3.49E-14    | 128 | 99 | 43 | 99 | 0/0 | 0/0 | 0/0 | match | match | match |
| 198564 | Agilent38MB | 7:99332807 | 5'UTR    | C/C | 2.44E-15    | 4   | 12 | 41 | 99 | 0/0 | 0/0 | 0/0 | match | match | match |
| 108971 | TruSeqV2    | 7:99332948 | promoter | T/T | 1.55E-15    | 39  | 90 | 34 | 96 | 0/0 | 0/0 | 0/0 | match | match | match |
| 115239 | TruSeqV2    | 7:99332948 | promoter | T/T | 8.88E-16    | 28  | 66 | 29 | 81 | 0/0 | 0/0 | 0/0 | match | match | match |
| 163383 | TruSeqV2    | 7:99332948 | promoter | T/T | 1.55E-15    | 41  | 96 | 38 | 99 | 0/0 | 0/0 | 0/0 | match | match | match |
| 198564 | Agilent38MB | 7:99332948 | promoter | T/T | 1.33E-15    | 1   | 3  | 59 | 99 | 0/0 | 0/0 | 0/0 | match | match | match |
| 108971 | TruSeqV2    | 7:99332997 | promoter | T/T | 0.000133895 | 10  | 27 | 42 | 99 | 0/0 | 0/0 | 0/0 | match | match | match |
| 115239 | TruSeqV2    | 7:99332997 | promoter | T/T | 0.000332224 | 7   | 12 | 45 | 99 | 0/0 | 0/0 | 0/0 | match | match | match |
| 163383 | TruSeqV2    | 7:99332997 | promoter | T/T | 1.77E-07    | 13  | 24 | 40 | 99 | 0/0 | 0/0 | 0/0 | match | match | match |
| 198564 | Agilent38MB | 7:99332997 | promoter | T/T | 5.82E-10    | 2   | 5  | 62 | 99 | 0/0 | 0/0 | 0/0 | match | match | match |
| 108971 | TruSeqV2    | 7:99333000 | promoter | A/A | 1.59E-11    | 10  | 24 | 45 | 99 | 0/0 | 0/0 | 0/0 | match | match | match |
| 115239 | TruSeqV2    | 7:99333000 | promoter | A/A | 1.97E-09    | 7   | 12 | 47 | 99 | 0/0 | 0/0 | 0/0 | match | match | match |
| 163383 | TruSeqV2    | 7:99333000 | promoter | A/A | 3.31E-14    | 13  | 24 | 41 | 99 | 0/0 | 0/0 | 0/0 | match | match | match |
| 198564 | Agilent38MB | 7:99333000 | promoter | A/A | 1.19E-06    | 2   | 5  | 59 | 99 | 0/0 | 0/0 | 0/0 | match | match | match |
| 115239 | TruSeqV2    | 7:99333030 | promoter | G/G | 2.44E-15    | 3   | 6  | 39 | 99 | 0/0 | 0/0 | 0/0 | match | match | match |
| 163383 | TruSeqV2    | 7:99333030 | promoter | G/G | 4.44E-16    | 5   | 9  | 35 | 93 | 0/0 | 0/0 | 0/0 | match | match | match |
| 108971 | TruSeqV2    | 7:99355806 | fs       | -/- | 4.44E-16    | 176 | 99 | 50 | 99 | 0/0 | 0/0 | 0/0 | match | match | match |
| 115239 | TruSeqV2    | 7:99355806 | fs       | -/- | 2.89E-15    | 176 | 99 | 50 | 99 | 0/0 | 0/0 | 0/0 | match | match | match |
| 132306 | Agilent38MB | 7:99355806 | fs       | -/- | 1.71E-14    | 176 | 99 | 50 | 99 | 0/0 | 0/0 | 0/0 | match | match | match |
| 163383 | TruSeqV2    | 7:99355806 | fs       | -/- | 3.11E-15    | 176 | 99 | 50 | 99 | 0/0 | 0/0 | 0/0 | match | match | match |
| 198564 | Agilent38MB | 7:99355806 | fs       | -/- | 6.66E-16    | 176 | 99 | 50 | 99 | 0/0 | 0/0 | 0/0 | match | match | match |
| 108971 | TruSeqV2    | 7:99358459 | missense | G/G | 1.11E-15    | 47  | 99 | 57 | 99 | 0/0 | 0/0 | 0/0 | match | match | match |
| 115239 | TruSeqV2    | 7:99358459 | missense | G/G | 6.66E-16    | 43  | 99 | 40 | 99 | 0/0 | 0/0 | 0/0 | match | match | match |
| 132306 | Agilent38MB | 7:99358459 | missense | G/G | 4.88E-15    | 109 | 99 | 38 | 99 | 0/0 | 0/0 | 0/0 | match | match | match |
| 163383 | TruSeqV2    | 7:99358459 | missense | G/G | 1.11E-15    | 61  | 99 | 43 | 99 | 0/0 | 0/0 | 0/0 | match | match | match |
| 198564 | Agilent38MB | 7:99358459 | missense | G/G | 6.66E-16    | 190 | 99 | 53 | 99 | 0/0 | 0/0 | 0/0 | match | match | match |
| 108971 | TruSeqV2    | 7:99358465 | fs       | -/- | 2.22E-16    | 52  | 99 | 57 | 99 | 0/0 | 0/0 | 0/0 | match | match | match |
| 115239 | TruSeqV2    | 7:99358465 | fs       | -/- | 2.22E-16    | 52  | 99 | 57 | 99 | 0/0 | 0/0 | 0/0 | match | match | match |
| 132306 | Agilent38MB | 7:99358465 | fs       | -/- | 4.44E-16    | 52  | 99 | 57 | 99 | 0/0 | 0/0 | 0/0 | match | match | match |
| 163383 | TruSeqV2    | 7:99358465 | fs       | -/- | 2.22E-16    | 52  | 99 | 57 | 99 | 0/0 | 0/0 | 0/0 | match | match | match |
| 198564 | Agilent38MB | 7:99358465 | fs       | -/- | 2.22E-16    | 52  | 99 | 57 | 99 | 0/0 | 0/0 | 0/0 | match | match | match |
| 108971 | TruSeqV2    | 7:99358524 | missense | A/A | 1.62E-14    | 93  | 99 | 38 | 99 | 0/0 | 0/0 | 0/0 | match | match | match |



|        |             |            |          |     |          |     |    |    |    |     |     |     |       |       |       |
|--------|-------------|------------|----------|-----|----------|-----|----|----|----|-----|-----|-----|-------|-------|-------|
| 115239 | TruSeqV2    | 7:99358524 | missense | A/A | 2.00E-15 | 62  | 99 | 42 | 99 | 0/0 | 0/0 | 0/0 | match | match | match |
| 132306 | Agilent38MB | 7:99358524 | missense | A/A | 1.37E-13 | 272 | 99 | 42 | 99 | 0/0 | 0/0 | 0/0 | match | match | match |
| 163383 | TruSeqV2    | 7:99358524 | missense | A/A | 2.33E-14 | 96  | 99 | 43 | 99 | 0/0 | 0/0 | 0/0 | match | match | match |
| 198564 | Agilent38MB | 7:99358524 | missense | A/A | 2.00E-15 | 532 | 99 | 48 | 99 | 0/0 | 0/0 | 0/0 | match | match | match |
| 108971 | TruSeqV2    | 7:99358566 | missense | A/A | 6.66E-16 | 76  | 99 | 35 | 96 | 0/0 | 0/0 | 0/0 | match | match | match |
| 115239 | TruSeqV2    | 7:99358566 | missense | A/A | 4.44E-16 | 52  | 99 | 46 | 99 | 0/0 | 0/0 | 0/0 | match | match | match |
| 132306 | Agilent38MB | 7:99358566 | missense | A/A | 2.22E-16 | 407 | 99 | 33 | 93 | 0/0 | 0/0 | 0/0 | match | match | match |
| 163383 | TruSeqV2    | 7:99358566 | missense | A/A | 2.22E-16 | 86  | 99 | 37 | 99 | 0/0 | 0/0 | 0/0 | match | match | match |
| 198564 | Agilent38MB | 7:99358566 | missense | A/A | 1.11E-15 | 817 | 99 | 43 | 99 | 0/0 | 0/0 | 0/0 | match | match | match |
| 108971 | TruSeqV2    | 7:99359670 | missense | G/G | 5.37E-13 | 95  | 99 | 43 | 99 | 0/0 | 0/0 | 0/0 | match | match | match |
| 115239 | TruSeqV2    | 7:99359670 | missense | G/G | 2.22E-16 | 63  | 99 | 28 | 69 | 0/0 | 0/0 | 0/0 | match | match | match |
| 132306 | Agilent38MB | 7:99359670 | missense | G/G | 4.44E-16 | 205 | 99 | 35 | 87 | 0/0 | 0/0 | 0/0 | match | match | match |
| 163383 | TruSeqV2    | 7:99359670 | missense | G/G | 4.44E-16 | 77  | 99 | 48 | 99 | 0/0 | 0/0 | 0/0 | match | match | match |
| 198564 | Agilent38MB | 7:99359670 | missense | G/G | 2.22E-16 | 423 | 99 | 44 | 99 | 0/0 | 0/0 | 0/0 | match | match | match |
| 108971 | TruSeqV2    | 7:99359800 | missense | G/G | 1.78E-15 | 128 | 99 | 39 | 99 | 0/0 | 0/0 | 0/0 | match | match | match |
| 115239 | TruSeqV2    | 7:99359800 | missense | G/G | 2.66E-14 | 82  | 99 | 35 | 96 | 0/0 | 0/0 | 0/0 | match | match | match |
| 132306 | Agilent38MB | 7:99359800 | missense | G/G | 8.88E-16 | 147 | 99 | 40 | 99 | 0/0 | 0/0 | 0/0 | match | match | match |
| 163383 | TruSeqV2    | 7:99359800 | missense | G/G | 3.33E-15 | 96  | 99 | 47 | 99 | 0/0 | 0/0 | 0/0 | match | match | match |
| 198564 | Agilent38MB | 7:99359800 | missense | G/G | 8.95E-11 | 295 | 99 | 49 | 99 | 0/0 | 0/0 | 0/0 | match | match | match |
| 108971 | TruSeqV2    | 7:99359829 | missense | G/G | 2.22E-16 | 103 | 99 | 44 | 99 | 0/0 | 0/0 | 0/0 | match | match | match |
| 115239 | TruSeqV2    | 7:99359829 | missense | G/G | 2.22E-16 | 62  | 99 | 40 | 99 | 0/0 | 0/0 | 0/0 | match | match | match |
| 132306 | Agilent38MB | 7:99359829 | missense | G/G | 2.22E-16 | 139 | 99 | 46 | 99 | 0/0 | 0/0 | 0/0 | match | match | match |
| 163383 | TruSeqV2    | 7:99359829 | missense | G/G | 2.22E-16 | 84  | 99 | 54 | 99 | 0/0 | 0/0 | 0/0 | match | match | match |
| 198564 | Agilent38MB | 7:99359829 | missense | G/G | 8.88E-16 | 256 | 99 | 55 | 99 | 0/0 | 0/0 | 0/0 | match | match | match |
| 108971 | TruSeqV2    | 7:99361466 | intronic | C/C | 7.35E-14 | 116 | 99 | 36 | 99 | 0/0 | 0/0 | 0/0 | match | match | match |
| 115239 | TruSeqV2    | 7:99361466 | intronic | C/C | 7.04E-14 | 72  | 99 | 42 | 0  | 0/0 | 0/0 | 0/0 | match | match | match |
| 132306 | Agilent38MB | 7:99361466 | intronic | T/C | 2.05E-11 | 49  | 99 | 24 | 99 | 0/1 | 0/1 | 0/1 | match | match | match |
| 163383 | TruSeqV2    | 7:99361466 | intronic | C/C | 1.09E-12 | 97  | 99 | 37 | 99 | 0/0 | 0/0 | 0/0 | match | match | match |
| 198564 | Agilent38MB | 7:99361466 | intronic | C/C | 6.56E-12 | 116 | 99 | 36 | 99 | 0/0 | 0/0 | 0/0 | match | match | match |
| 108971 | TruSeqV2    | 7:99361626 | missense | A/A | 3.77E-15 | 98  | 99 | 50 | 99 | 0/0 | 0/0 | 0/0 | match | match | match |
| 115239 | TruSeqV2    | 7:99361626 | missense | A/A | 2.22E-16 | 72  | 99 | 43 | 99 | 0/0 | 0/0 | 0/0 | match | match | match |
| 132306 | Agilent38MB | 7:99361626 | missense | A/A | 1.33E-15 | 160 | 99 | 43 | 99 | 0/0 | 0/0 | 0/0 | match | match | match |
| 163383 | TruSeqV2    | 7:99361626 | missense | A/A | 4.44E-16 | 110 | 99 | 34 | 99 | 0/0 | 0/0 | 0/0 | match | match | match |
| 198564 | Agilent38MB | 7:99361626 | missense | A/A | 4.44E-16 | 339 | 99 | 57 | 99 | 0/0 | 0/0 | 0/0 | match | match | match |
| 108971 | TruSeqV2    | 7:99364034 | fs       | -/- | 2.22E-16 | 113 | 99 | 48 | 99 | 0/0 | 0/0 | 0/0 | match | match | match |
| 115239 | TruSeqV2    | 7:99364034 | fs       | -/- | 2.22E-16 | 113 | 99 | 48 | 99 | 0/0 | 0/0 | 0/0 | match | match | match |
| 132306 | Agilent38MB | 7:99364034 | fs       | -/- | 2.22E-16 | 113 | 99 | 48 | 99 | 0/0 | 0/0 | 0/0 | match | match | match |
| 163383 | TruSeqV2    | 7:99364034 | fs       | -/- | 2.22E-16 | 113 | 99 | 48 | 99 | 0/0 | 0/0 | 0/0 | match | match | match |

|        |             |            |          |     |          |     |    |    |    |     |     |     |       |       |       |
|--------|-------------|------------|----------|-----|----------|-----|----|----|----|-----|-----|-----|-------|-------|-------|
| 198564 | Agilent38MB | 7:99364034 | fs       | -/- | 8.88E-16 | 113 | 99 | 48 | 99 | 0/0 | 0/0 | 0/0 | match | match | match |
| 108971 | TruSeqV2    | 7:99364798 | missense | A/A | 6.66E-16 | 41  | 99 | 43 | 99 | 0/0 | 0/0 | 0/0 | match | match | match |
| 115239 | TruSeqV2    | 7:99364798 | missense | A/A | 6.66E-16 | 31  | 90 | 34 | 96 | 0/0 | 0/0 | 0/0 | match | match | match |
| 132306 | Agilent38MB | 7:99364798 | missense | A/A | 2.22E-16 | 37  | 81 | 40 | 99 | 0/0 | 0/0 | 0/0 | match | match | match |
| 163383 | TruSeqV2    | 7:99364798 | missense | A/A | 4.44E-16 | 44  | 99 | 60 | 99 | 0/0 | 0/0 | 0/0 | match | match | match |
| 198564 | Agilent38MB | 7:99364798 | missense | A/A | 3.55E-15 | 57  | 90 | 45 | 99 | 0/0 | 0/0 | 0/0 | match | match | match |
| 108971 | TruSeqV2    | 7:99365983 | missense | A/A | 6.66E-16 | 74  | 99 | 60 | 99 | 0/0 | 0/0 | 0/0 | match | match | match |
| 115239 | TruSeqV2    | 7:99365983 | missense | A/A | 1.11E-15 | 54  | 99 | 58 | 99 | 0/0 | 0/0 | 0/0 | match | match | match |
| 132306 | Agilent38MB | 7:99365983 | missense | A/A | 2.22E-16 | 70  | 99 | 36 | 99 | 0/0 | 0/0 | 0/0 | match | match | match |
| 163383 | TruSeqV2    | 7:99365983 | missense | A/A | 1.11E-15 | 88  | 99 | 50 | 99 | 0/0 | 0/0 | 0/0 | match | match | match |
| 198564 | Agilent38MB | 7:99365983 | missense | A/A | 5.55E-15 | 79  | 99 | 36 | 84 | 0/0 | 0/0 | 0/0 | match | match | match |
| 108971 | TruSeqV2    | 7:99365994 | missense | G/G | 4.44E-16 | 88  | 99 | 58 | 99 | 0/0 | 0/0 | 0/0 | match | match | match |
| 115239 | TruSeqV2    | 7:99365994 | missense | G/G | 8.88E-16 | 63  | 99 | 54 | 99 | 0/0 | 0/0 | 0/0 | match | match | match |
| 132306 | Agilent38MB | 7:99365994 | missense | G/G | 4.44E-16 | 89  | 99 | 37 | 99 | 0/0 | 0/0 | 0/0 | match | match | match |
| 163383 | TruSeqV2    | 7:99365994 | missense | G/G | 1.11E-15 | 98  | 99 | 59 | 99 | 0/0 | 0/0 | 0/0 | match | match | match |
| 198564 | Agilent38MB | 7:99365994 | missense | G/G | 8.66E-15 | 100 | 99 | 33 | 90 | 0/0 | 0/0 | 0/0 | match | match | match |
| 108971 | TruSeqV2    | 7:99366070 | missense | T/T | 4.44E-16 | 216 | 99 | 38 | 99 | 0/0 | 0/0 | 0/0 | match | match | match |
| 115239 | TruSeqV2    | 7:99366070 | missense | T/T | 2.22E-16 | 141 | 99 | 52 | 99 | 0/0 | 0/0 | 0/0 | match | match | match |
| 132306 | Agilent38MB | 7:99366070 | missense | T/T | 4.44E-16 | 229 | 99 | 29 | 78 | 0/0 | 0/0 | 0/0 | match | match | match |
| 163383 | TruSeqV2    | 7:99366070 | missense | T/T | 4.44E-16 | 186 | 99 | 47 | 99 | 0/0 | 0/0 | 0/0 | match | match | match |
| 198564 | Agilent38MB | 7:99366070 | missense | T/T | 2.22E-16 | 487 | 99 | 44 | 99 | 0/0 | 0/0 | 0/0 | match | match | match |
| 108971 | TruSeqV2    | 7:99366081 | missense | A/A | 2.22E-16 | 221 | 99 | 35 | 96 | 0/0 | 0/0 | 0/0 | match | match | match |
| 115239 | TruSeqV2    | 7:99366081 | missense | A/A | 4.44E-16 | 148 | 99 | 46 | 99 | 0/0 | 0/0 | 0/0 | match | match | match |
| 132306 | Agilent38MB | 7:99366081 | missense | A/A | 2.22E-16 | 245 | 99 | 24 | 60 | 0/0 | 0/0 | 0/0 | match | match | match |
| 163383 | TruSeqV2    | 7:99366081 | missense | A/A | 2.22E-16 | 194 | 99 | 47 | 99 | 0/0 | 0/0 | 0/0 | match | match | match |
| 198564 | Agilent38MB | 7:99366081 | missense | A/A | 2.22E-16 | 531 | 99 | 42 | 99 | 0/0 | 0/0 | 0/0 | match | match | match |
| 108971 | TruSeqV2    | 7:99366093 | missense | G/G | 2.22E-16 | 226 | 99 | 39 | 99 | 0/0 | 0/0 | 0/0 | match | match | match |
| 115239 | TruSeqV2    | 7:99366093 | missense | G/G | 2.22E-16 | 152 | 99 | 48 | 99 | 0/0 | 0/0 | 0/0 | match | match | match |
| 132306 | Agilent38MB | 7:99366093 | missense | G/G | 4.44E-16 | 251 | 99 | 24 | 66 | 0/0 | 0/0 | 0/0 | match | match | match |
| 163383 | TruSeqV2    | 7:99366093 | missense | G/G | 2.22E-16 | 191 | 99 | 39 | 99 | 0/0 | 0/0 | 0/0 | match | match | match |
| 198564 | Agilent38MB | 7:99366093 | missense | G/G | 6.66E-16 | 535 | 99 | 38 | 99 | 0/0 | 0/0 | 0/0 | match | match | match |
| 108971 | TruSeqV2    | 7:99367392 | missense | C/C | 5.46E-11 | 112 | 99 | 49 | 99 | 0/0 | 0/0 | 0/0 | match | match | match |
| 115239 | TruSeqV2    | 7:99367392 | missense | C/C | 9.06E-08 | 85  | 99 | 29 | 75 | 0/0 | 0/0 | 0/0 | match | match | match |
| 132306 | Agilent38MB | 7:99367392 | missense | C/C | 1.25E-11 | 127 | 99 | 33 | 81 | 0/0 | 0/0 | 0/0 | match | match | match |
| 163383 | TruSeqV2    | 7:99367392 | missense | C/C | 1.60E-06 | 97  | 99 | 35 | 78 | 0/0 | 0/0 | 0/0 | match | match | match |
| 198564 | Agilent38MB | 7:99367392 | missense | C/C | 6.72E-11 | 222 | 99 | 39 | 93 | 0/0 | 0/0 | 0/0 | match | match | match |
| 108971 | TruSeqV2    | 7:99367427 | missense | C/C | 2.22E-16 | 146 | 99 | 38 | 99 | 0/0 | 0/0 | 0/0 | match | match | match |
| 115239 | TruSeqV2    | 7:99367427 | missense | C/C | 2.22E-16 | 100 | 99 | 15 | 39 | 0/0 | 0/0 | 0/0 | match | match | match |

|        |             |            |          |     |          |     |    |    |    |     |     |     |       |       |       |
|--------|-------------|------------|----------|-----|----------|-----|----|----|----|-----|-----|-----|-------|-------|-------|
| 132306 | Agilent38MB | 7:99367427 | missense | C/C | 2.22E-16 | 172 | 99 | 36 | 96 | 0/0 | 0/0 | 0/0 | match | match | match |
| 163383 | TruSeqV2    | 7:99367427 | missense | C/C | 2.22E-16 | 115 | 99 | 38 | 99 | 0/0 | 0/0 | 0/0 | match | match | match |
| 198564 | Agilent38MB | 7:99367427 | missense | C/C | 2.22E-16 | 295 | 99 | 38 | 99 | 0/0 | 0/0 | 0/0 | match | match | match |
| 108971 | TruSeqV2    | 7:99367788 | missense | C/C | 3.11E-15 | 78  | 99 | 42 | 99 | 0/0 | 0/0 | 0/0 | match | match | match |
| 115239 | TruSeqV2    | 7:99367788 | missense | C/C | 6.88E-15 | 46  | 99 | 39 | 99 | 0/0 | 0/0 | 0/0 | match | match | match |
| 132306 | Agilent38MB | 7:99367788 | missense | C/C | 2.00E-15 | 177 | 99 | 31 | 81 | 0/0 | 0/0 | 0/0 | match | match | match |
| 163383 | TruSeqV2    | 7:99367788 | missense | C/C | 2.44E-14 | 54  | 99 | 39 | 99 | 0/0 | 0/0 | 0/0 | match | match | match |
| 198564 | Agilent38MB | 7:99367788 | missense | C/C | 3.33E-14 | 374 | 99 | 33 | 83 | 0/0 | 0/0 | 0/0 | match | match | match |
| 108971 | TruSeqV2    | 7:99367825 | missense | T/T | 2.22E-16 | 104 | 99 | 34 | 96 | 0/0 | 0/0 | 0/0 | match | match | match |
| 115239 | TruSeqV2    | 7:99367825 | missense | T/T | 2.22E-16 | 55  | 99 | 31 | 75 | 0/0 | 0/0 | 0/0 | match | match | match |
| 132306 | Agilent38MB | 7:99367825 | missense | T/T | 2.22E-16 | 184 | 99 | 25 | 69 | 0/0 | 0/0 | 0/0 | match | match | match |
| 163383 | TruSeqV2    | 7:99367825 | missense | T/T | 2.22E-16 | 64  | 99 | 34 | 90 | 0/0 | 0/0 | 0/0 | match | match | match |
| 198564 | Agilent38MB | 7:99367825 | missense | T/T | 1.11E-15 | 395 | 99 | 29 | 72 | 0/0 | 0/0 | 0/0 | match | match | match |
| 108971 | TruSeqV2    | 7:99370245 | missense | T/T | 4.11E-13 | 71  | 99 | 45 | 99 | 0/0 | 0/0 | 0/0 | match | match | match |
| 115239 | TruSeqV2    | 7:99370245 | missense | T/T | 4.84E-14 | 40  | 99 | 28 | 72 | 0/0 | 0/0 | 0/0 | match | match | match |
| 132306 | Agilent38MB | 7:99370245 | missense | T/T | 6.66E-15 | 316 | 99 | 38 | 99 | 0/0 | 0/0 | 0/0 | match | match | match |
| 163383 | TruSeqV2    | 7:99370245 | missense | T/T | 1.88E-12 | 68  | 99 | 51 | 99 | 0/0 | 0/0 | 0/0 | match | match | match |
| 198564 | Agilent38MB | 7:99370245 | missense | T/T | 9.57E-13 | 650 | 99 | 56 | 99 | 0/0 | 0/0 | 0/0 | match | match | match |
| 108971 | TruSeqV2    | 7:99375702 | missense | C/C | 2.22E-16 | 43  | 99 | 37 | 74 | 0/0 | 0/0 | 0/0 | match | match | match |
| 115239 | TruSeqV2    | 7:99375702 | missense | C/C | 6.66E-16 | 27  | 72 | 42 | 99 | 0/0 | 0/0 | 0/0 | match | match | match |
| 132306 | Agilent38MB | 7:99375702 | missense | C/C | 2.22E-16 | 54  | 93 | 47 | 99 | 0/0 | 0/0 | 0/0 | match | match | match |
| 163383 | TruSeqV2    | 7:99375702 | missense | C/C | 1.11E-15 | 33  | 84 | 37 | 99 | 0/0 | 0/0 | 0/0 | match | match | match |
| 198564 | Agilent38MB | 7:99375702 | missense | C/C | 2.00E-15 | 102 | 99 | 58 | 99 | 0/0 | 0/0 | 0/0 | match | match | match |
| 108971 | TruSeqV2    | 7:99381661 | missense | A/A | 2.22E-16 | 62  | 99 | 41 | 96 | 0/0 | 0/0 | 0/0 | match | match | match |
| 115239 | TruSeqV2    | 7:99381661 | missense | A/A | 2.22E-16 | 58  | 99 | 33 | 78 | 0/0 | 0/0 | 0/0 | match | match | match |
| 132306 | Agilent38MB | 7:99381661 | missense | A/A | 2.22E-16 | 95  | 99 | 34 | 78 | 0/0 | 0/0 | 0/0 | match | match | match |
| 163383 | TruSeqV2    | 7:99381661 | missense | A/A | 2.22E-16 | 50  | 99 | 29 | 75 | 0/0 | 0/0 | 0/0 | match | match | match |
| 198564 | Agilent38MB | 7:99381661 | missense | A/A | 4.44E-16 | 179 | 99 | 49 | 99 | 0/0 | 0/0 | 0/0 | match | match | match |
| 108971 | TruSeqV2    | 7:99445132 | synon    | C/C | 2.66E-15 | 46  | 99 | 43 | 99 | 0/0 | 0/0 | 0/0 | match | match | match |
| 115239 | TruSeqV2    | 7:99445132 | synon    | C/C | 4.00E-15 | 38  | 99 | 48 | 99 | 0/0 | 0/0 | 0/0 | match | match | match |
| 132306 | Agilent38MB | 7:99445132 | synon    | C/C | 2.66E-15 | 75  | 99 | 50 | 99 | 0/0 | 0/0 | 0/0 | match | match | match |
| 163383 | TruSeqV2    | 7:99445132 | synon    | C/C | 3.11E-15 | 52  | 99 | 39 | 99 | 0/0 | 0/0 | 0/0 | match | match | match |
| 198564 | Agilent38MB | 7:99445132 | synon    | C/C | 8.75E-14 | 137 | 99 | 44 | 99 | 0/0 | 0/0 | 0/0 | match | match | match |
| 108971 | TruSeqV2    | 7:99445791 | missense | G/G | 2.22E-16 | 140 | 99 | 37 | 96 | 0/0 | 0/0 | 0/0 | match | match | match |
| 115239 | TruSeqV2    | 7:99445791 | missense | G/G | 1.33E-15 | 101 | 99 | 43 | 99 | 0/0 | 0/0 | 0/0 | match | match | match |
| 132306 | Agilent38MB | 7:99445791 | missense | G/G | 4.44E-16 | 58  | 99 | 40 | 99 | 0/0 | 0/0 | 0/0 | match | match | match |
| 163383 | TruSeqV2    | 7:99445791 | missense | G/G | 6.66E-16 | 123 | 99 | 33 | 93 | 0/0 | 0/0 | 0/0 | match | match | match |
| 198564 | Agilent38MB | 7:99445791 | missense | G/G | 8.88E-16 | 148 | 99 | 48 | 99 | 0/0 | 0/0 | 0/0 | match | match | match |

|        |             |             |          |     |          |     |    |    |    |     |     |     |       |       |       |
|--------|-------------|-------------|----------|-----|----------|-----|----|----|----|-----|-----|-----|-------|-------|-------|
| 108971 | TruSeqV2    | 7:99447241  | synon    | T/T | 4.44E-16 | 46  | 99 | 43 | 99 | 0/0 | 0/0 | 0/0 | match | match | match |
| 115239 | TruSeqV2    | 7:99447241  | synon    | T/T | 8.88E-16 | 22  | 57 | 53 | 99 | 0/0 | 0/0 | 0/0 | match | match | match |
| 132306 | Agilent38MB | 7:99447241  | synon    | T/T | 6.66E-16 | 96  | 99 | 29 | 75 | 0/0 | 0/0 | 0/0 | match | match | match |
| 163383 | TruSeqV2    | 7:99447241  | synon    | C/T | 3.33E-15 | 33  | 99 | 44 | 99 | 0/1 | 0/1 | 0/1 | match | match | match |
| 198564 | Agilent38MB | 7:99447241  | synon    | T/T | 4.44E-16 | 163 | 99 | 49 | 99 | 0/0 | 0/0 | 0/0 | match | match | match |
| 108971 | TruSeqV2    | 7:99454482  | missense | G/G | 1.78E-15 | 70  | 99 | 41 | 99 | 0/0 | 0/0 | 0/0 | match | match | match |
| 115239 | TruSeqV2    | 7:99454482  | missense | G/G | 1.55E-15 | 42  | 99 | 49 | 99 | 0/0 | 0/0 | 0/0 | match | match | match |
| 132306 | Agilent38MB | 7:99454482  | missense | G/G | 4.44E-16 | 192 | 99 | 45 | 99 | 0/0 | 0/0 | 0/0 | match | match | match |
| 163383 | TruSeqV2    | 7:99454482  | missense | G/G | 9.77E-15 | 69  | 99 | 42 | 99 | 0/0 | 0/0 | 0/0 | match | match | match |
| 198564 | Agilent38MB | 7:99454482  | missense | G/G | 1.33E-14 | 279 | 99 | 40 | 99 | 0/0 | 0/0 | 0/0 | match | match | match |
| 108971 | TruSeqV2    | 7:99457605  | missense | C/C | 8.88E-16 | 139 | 99 | 33 | 84 | 0/0 | 0/0 | 0/0 | match | match | match |
| 115239 | TruSeqV2    | 7:99457605  | missense | C/C | 4.44E-16 | 108 | 99 | 34 | 90 | 0/0 | 0/0 | 0/0 | match | match | match |
| 132306 | Agilent38MB | 7:99457605  | missense | C/C | 8.88E-16 | 100 | 99 | 31 | 87 | 0/0 | 0/0 | 0/0 | match | match | match |
| 163383 | TruSeqV2    | 7:99457605  | missense | C/G | 3.07E-12 | 118 | 99 | 38 | 99 | 0/1 | 0/1 | 0/1 | match | match | match |
| 198564 | Agilent38MB | 7:99457605  | missense | C/C | 5.55E-15 | 156 | 99 | 33 | 96 | 0/0 | 0/0 | 0/0 | match | match | match |
| 108971 | TruSeqV2    | 7:99459256  | synon    | C/T | 1.11E-14 | 61  | 99 | 46 | 99 | 0/1 | 0/1 | 0/1 | match | match | match |
| 115239 | TruSeqV2    | 7:99459256  | synon    | C/C | 2.22E-16 | 52  | 99 | 51 | 99 | 0/0 | 0/0 | 0/0 | match | match | match |
| 132306 | Agilent38MB | 7:99459256  | synon    | C/C | 6.66E-16 | 54  | 99 | 38 | 99 | 0/0 | 0/0 | 0/0 | match | match | match |
| 163383 | TruSeqV2    | 7:99459256  | synon    | C/C | 2.22E-16 | 56  | 99 | 41 | 99 | 0/0 | 0/0 | 0/0 | match | match | match |
| 198564 | Agilent38MB | 7:99459256  | synon    | C/C | 2.22E-16 | 114 | 99 | 41 | 99 | 0/0 | 0/0 | 0/0 | match | match | match |
| 108971 | TruSeqV2    | 8:143954747 | 3'UTR    | T/C | 1.55E-15 | 104 | 99 | 36 | 99 | 0/1 | 0/1 | 0/1 | match | match | match |
| 115239 | TruSeqV2    | 8:143954747 | 3'UTR    | T/C | 8.88E-16 | 81  | 99 | 22 | 99 | 0/1 | 0/1 | 0/1 | match | match | match |
| 163383 | TruSeqV2    | 8:143954747 | 3'UTR    | T/C | 8.88E-16 | 114 | 99 | 25 | 99 | 0/1 | 0/1 | 0/1 | match | match | match |
| 198564 | Agilent38MB | 8:143954747 | 3'UTR    | C/C | 9.75E-14 | 2   | 6  | 36 | 99 | 1/1 | 1/1 | 1/1 | match | match | match |
| 108971 | TruSeqV2    | 8:143954759 | 3'UTR    | C/C | 1.11E-15 | 115 | 99 | 42 | 99 | 0/0 | 0/0 | 0/0 | match | match | match |
| 115239 | TruSeqV2    | 8:143954759 | 3'UTR    | C/C | 6.66E-16 | 96  | 99 | 23 | 57 | 0/0 | 0/0 | 0/0 | match | match | match |
| 163383 | TruSeqV2    | 8:143954759 | 3'UTR    | C/C | 6.66E-16 | 120 | 99 | 21 | 63 | 0/0 | 0/0 | 0/0 | match | match | match |
| 198564 | Agilent38MB | 8:143954759 | 3'UTR    | C/C | 6.66E-16 | 2   | 6  | 40 | 99 | 0/0 | 0/0 | 0/0 | match | match | match |
| 108971 | TruSeqV2    | 8:143954853 | 3'UTR    | C/C | 2.13E-08 | 299 | 99 | 52 | 99 | 0/0 | 0/0 | 0/0 | match | match | match |
| 115239 | TruSeqV2    | 8:143954853 | 3'UTR    | C/C | 6.66E-16 | 213 | 99 | 28 | 75 | 0/0 | 0/0 | 0/0 | match | match | match |
| 163383 | TruSeqV2    | 8:143954853 | 3'UTR    | C/C | 3.64E-08 | 204 | 99 | 41 | 99 | 0/0 | 0/0 | 0/0 | match | match | match |
| 198564 | Agilent38MB | 8:143954853 | 3'UTR    | C/C | 5.11E-15 | 2   | 3  | 50 | 99 | 0/0 | 0/0 | 0/0 | match | match | match |
| 108971 | TruSeqV2    | 8:143955074 | 3'UTR    | A/A | 3.77E-15 | 522 | 99 | 41 | 99 | 0/0 | 0/0 | 0/0 | match | match | match |
| 115239 | TruSeqV2    | 8:143955074 | 3'UTR    | A/A | 8.88E-16 | 344 | 99 | 21 | 51 | 0/0 | 0/0 | 0/0 | match | match | match |
| 163383 | TruSeqV2    | 8:143955074 | 3'UTR    | A/A | 8.88E-16 | 383 | 99 | 27 | 66 | 0/0 | 0/0 | 0/0 | match | match | match |
| 108971 | TruSeqV2    | 8:143955095 | 3'UTR    | G/A | 1.55E-14 | 555 | 99 | 43 | 99 | 0/1 | 0/1 | 0/1 | match | match | match |
| 115239 | TruSeqV2    | 8:143955095 | 3'UTR    | G/A | 2.98E-14 | 334 | 99 | 21 | 99 | 0/1 | 0/1 | 0/1 | match | match | match |
| 163383 | TruSeqV2    | 8:143955095 | 3'UTR    | G/A | 5.11E-15 | 399 | 99 | 19 | 99 | 0/1 | 0/1 | 0/1 | match | match | match |

|        |             |             |          |     |          |     |    |    |    |     |     |     |       |       |       |
|--------|-------------|-------------|----------|-----|----------|-----|----|----|----|-----|-----|-----|-------|-------|-------|
| 108971 | TruSeqV2    | 8:143955097 | 3'UTR    | C/C | 3.33E-15 | 577 | 99 | 42 | 99 | 0/0 | 0/0 | 0/0 | match | match | match |
| 115239 | TruSeqV2    | 8:143955097 | 3'UTR    | C/C | 2.66E-15 | 335 | 99 | 24 | 63 | 0/0 | 0/0 | 0/0 | match | match | match |
| 163383 | TruSeqV2    | 8:143955097 | 3'UTR    | C/C | 2.44E-15 | 412 | 99 | 19 | 51 | 0/0 | 0/0 | 0/0 | match | match | match |
| 108971 | TruSeqV2    | 8:143955113 | 3'UTR    | G/G | 2.22E-16 | 602 | 99 | 38 | 99 | 0/0 | 0/0 | 0/0 | match | match | match |
| 115239 | TruSeqV2    | 8:143955113 | 3'UTR    | G/G | 6.66E-16 | 371 | 99 | 25 | 66 | 0/0 | 0/0 | 0/0 | match | match | match |
| 132306 | Agilent38MB | 8:143955113 | 3'UTR    | G/G | 4.44E-16 | 1   | 3  | 32 | 87 | 0/0 | 0/0 | 0/0 | match | match | match |
| 163383 | TruSeqV2    | 8:143955113 | 3'UTR    | G/G | 6.66E-16 | 416 | 99 | 19 | 54 | 0/0 | 0/0 | 0/0 | match | match | match |
| 108971 | TruSeqV2    | 8:143955144 | 3'UTR    | T/T | 2.44E-15 | 595 | 99 | 47 | 99 | 0/0 | 0/0 | 0/0 | match | match | match |
| 115239 | TruSeqV2    | 8:143955144 | 3'UTR    | T/T | 4.44E-16 | 413 | 99 | 38 | 85 | 0/0 | 0/0 | 0/0 | match | match | match |
| 132306 | Agilent38MB | 8:143955144 | 3'UTR    | T/T | 1.11E-15 | 1   | 3  | 27 | 69 | 0/0 | 0/0 | 0/0 | match | match | match |
| 163383 | TruSeqV2    | 8:143955144 | 3'UTR    | T/T | 4.44E-16 | 485 | 99 | 29 | 75 | 0/0 | 0/0 | 0/0 | match | match | match |
| 108971 | TruSeqV2    | 8:143955221 | 3'UTR    | C/C | 4.44E-16 | 478 | 99 | 36 | 90 | 0/0 | 0/0 | 0/0 | match | match | match |
| 115239 | TruSeqV2    | 8:143955221 | 3'UTR    | C/C | 6.66E-16 | 334 | 99 | 30 | 75 | 0/0 | 0/0 | 0/0 | match | match | match |
| 132306 | Agilent38MB | 8:143955221 | 3'UTR    | C/C | 4.44E-16 | 3   | 6  | 31 | 90 | 0/0 | 0/0 | 0/0 | match | match | match |
| 163383 | TruSeqV2    | 8:143955221 | 3'UTR    | C/C | 8.88E-16 | 442 | 99 | 35 | 96 | 0/0 | 0/0 | 0/0 | match | match | match |
| 108971 | TruSeqV2    | 8:143955338 | 3'UTR    | T/T | 4.44E-16 | 455 | 99 | 40 | 99 | 0/0 | 0/0 | 0/0 | match | match | match |
| 115239 | TruSeqV2    | 8:143955338 | 3'UTR    | T/T | 2.22E-16 | 328 | 99 | 29 | 81 | 0/0 | 0/0 | 0/0 | match | match | match |
| 132306 | Agilent38MB | 8:143955338 | 3'UTR    | T/T | 1.11E-15 | 4   | 12 | 34 | 84 | 0/0 | 0/0 | 0/0 | match | match | match |
| 163383 | TruSeqV2    | 8:143955338 | 3'UTR    | T/T | 4.44E-16 | 389 | 99 | 45 | 99 | 0/0 | 0/0 | 0/0 | match | match | match |
| 198564 | Agilent38MB | 8:143955338 | 3'UTR    | T/T | 4.44E-16 | 1   | 3  | 47 | 99 | 0/0 | 0/0 | 0/0 | match | match | match |
| 108971 | TruSeqV2    | 8:143955581 | 3'UTR    | A/A | 1.33E-15 | 434 | 99 | 47 | 99 | 0/0 | 0/0 | 0/0 | match | match | match |
| 115239 | TruSeqV2    | 8:143955581 | 3'UTR    | A/A | 1.78E-15 | 268 | 99 | 30 | 84 | 0/0 | 0/0 | 0/0 | match | match | match |
| 132306 | Agilent38MB | 8:143955581 | 3'UTR    | A/A | 1.35E-14 | 2   | 5  | 38 | 99 | 0/0 | 0/0 | 0/0 | match | match | match |
| 163383 | TruSeqV2    | 8:143955581 | 3'UTR    | A/A | 9.68E-14 | 347 | 99 | 36 | 99 | 0/0 | 0/0 | 0/0 | match | match | match |
| 198564 | Agilent38MB | 8:143955581 | 3'UTR    | A/A | 5.81E-12 | 5   | 9  | 45 | 99 | 0/0 | 0/0 | 0/0 | match | match | match |
| 108971 | TruSeqV2    | 8:143955657 | 3'UTR    | A/A | 1.80E-14 | 451 | 99 | 37 | 96 | 0/0 | 0/0 | 0/0 | match | match | match |
| 115239 | TruSeqV2    | 8:143955657 | 3'UTR    | G/A | 3.18E-14 | 302 | 99 | 16 | 99 | 0/1 | 0/1 | 0/1 | match | match | match |
| 163383 | TruSeqV2    | 8:143955657 | 3'UTR    | A/A | 1.11E-15 | 386 | 99 | 34 | 93 | 0/0 | 0/0 | 0/0 | match | match | match |
| 198564 | Agilent38MB | 8:143955657 | 3'UTR    | G/A | 5.77E-15 | 6   | 81 | 51 | 99 | 0/1 | 0/1 | 0/1 | match | match | match |
| 108971 | TruSeqV2    | 8:143956544 | synon    | A/A | 1.55E-15 | 183 | 99 | 44 | 99 | 0/0 | 0/0 | 0/0 | match | match | match |
| 115239 | TruSeqV2    | 8:143956544 | synon    | A/A | 8.88E-16 | 104 | 99 | 19 | 45 | 0/0 | 0/0 | 0/0 | match | match | match |
| 132306 | Agilent38MB | 8:143956544 | synon    | A/A | 6.66E-16 | 55  | 99 | 31 | 81 | 0/0 | 0/0 | 0/0 | match | match | match |
| 163383 | TruSeqV2    | 8:143956544 | synon    | A/A | 4.44E-16 | 120 | 99 | 28 | 63 | 0/0 | 0/0 | 0/0 | match | match | match |
| 198564 | Agilent38MB | 8:143956544 | synon    | A/A | 6.66E-16 | 110 | 99 | 29 | 81 | 0/0 | 0/0 | 0/0 | match | match | match |
| 108971 | TruSeqV2    | 8:143957734 | missense | G/G | 2.00E-15 | 90  | 99 | 28 | 81 | 0/0 | 0/0 | 0/0 | match | match | match |
| 115239 | TruSeqV2    | 8:143957734 | missense | G/G | 1.11E-15 | 80  | 99 | 12 | 30 | 0/0 | 0/0 | 0/0 | match | match | match |
| 132306 | Agilent38MB | 8:143957734 | missense | G/G | 1.11E-15 | 46  | 90 | 24 | 60 | 0/0 | 0/0 | 0/0 | match | match | match |
| 163383 | TruSeqV2    | 8:143957734 | missense | G/G | 8.88E-16 | 91  | 99 | 28 | 83 | 0/0 | 0/0 | 0/0 | match | match | match |

|        |             |             |          |     |          |     |    |    |    |     |     |     |       |       |       |
|--------|-------------|-------------|----------|-----|----------|-----|----|----|----|-----|-----|-----|-------|-------|-------|
| 198564 | Agilent38MB | 8:143957734 | missense | G/G | 1.78E-15 | 94  | 99 | 22 | 63 | 0/0 | 0/0 | 0/0 | match | match | match |
| 108971 | TruSeqV2    | 8:143961043 | missense | C/C | 8.88E-16 | 122 | 99 | 35 | 99 | 0/0 | 0/0 | 0/0 | match | match | match |
| 115239 | TruSeqV2    | 8:143961043 | missense | C/C | 8.88E-16 | 83  | 99 | 22 | 57 | 0/0 | 0/0 | 0/0 | match | match | match |
| 132306 | Agilent38MB | 8:143961043 | missense | C/C | 8.88E-16 | 67  | 99 | 27 | 78 | 0/0 | 0/0 | 0/0 | match | match | match |
| 163383 | TruSeqV2    | 8:143961043 | missense | C/C | 8.88E-16 | 93  | 99 | 35 | 90 | 0/0 | 0/0 | 0/0 | match | match | match |
| 198564 | Agilent38MB | 8:143961043 | missense | C/C | 2.21E-13 | 98  | 99 | 35 | 96 | 0/0 | 0/0 | 0/0 | match | match | match |
| 108971 | TruSeqV2    | 8:143961102 | missense | C/C | 3.36E-07 | 149 | 99 | 43 | 99 | 0/0 | 0/0 | 0/0 | match | match | match |
| 115239 | TruSeqV2    | 8:143961102 | missense | C/C | 8.88E-16 | 123 | 99 | 13 | 33 | 0/0 | 0/0 | 0/0 | match | match | match |
| 132306 | Agilent38MB | 8:143961102 | missense | C/C | 9.60E-09 | 92  | 99 | 45 | 99 | 0/0 | 0/0 | 0/0 | match | match | match |
| 163383 | TruSeqV2    | 8:143961102 | missense | C/C | 9.54E-13 | 113 | 99 | 37 | 90 | 0/0 | 0/0 | 0/0 | match | match | match |
| 198564 | Agilent38MB | 8:143961102 | missense | C/C | 8.88E-16 | 173 | 99 | 41 | 91 | 0/0 | 0/0 | 0/0 | match | match | match |
| 108971 | TruSeqV2    | 8:143961201 | missense | C/C | 6.66E-16 | 92  | 99 | 42 | 99 | 0/0 | 0/0 | 0/0 | match | match | match |
| 115239 | TruSeqV2    | 8:143961201 | missense | C/C | 6.66E-16 | 68  | 99 | 24 | 66 | 0/0 | 0/0 | 0/0 | match | match | match |
| 132306 | Agilent38MB | 8:143961201 | missense | C/C | 4.44E-16 | 292 | 99 | 38 | 99 | 0/0 | 0/0 | 0/0 | match | match | match |
| 163383 | TruSeqV2    | 8:143961201 | missense | C/C | 1.11E-15 | 73  | 99 | 35 | 93 | 0/0 | 0/0 | 0/0 | match | match | match |
| 198564 | Agilent38MB | 8:143961201 | missense | C/C | 1.35E-14 | 656 | 99 | 41 | 99 | 0/0 | 0/0 | 0/0 | match | match | match |
| 108971 | TruSeqV2    | 8:143994136 | missense | A/A | 1.33E-15 | 161 | 99 | 33 | 93 | 0/0 | 0/0 | 0/0 | match | match | match |
| 115239 | TruSeqV2    | 8:143994136 | missense | A/A | 4.44E-16 | 95  | 99 | 23 | 50 | 0/0 | 0/0 | 0/0 | match | match | match |
| 132306 | Agilent38MB | 8:143994136 | missense | A/A | 2.00E-15 | 82  | 99 | 29 | 81 | 0/0 | 0/0 | 0/0 | match | match | match |
| 163383 | TruSeqV2    | 8:143994136 | missense | A/A | 6.66E-16 | 140 | 99 | 30 | 51 | 0/0 | 0/0 | 0/0 | match | match | match |
| 198564 | Agilent38MB | 8:143994136 | missense | A/A | 4.44E-16 | 110 | 99 | 56 | 99 | 0/0 | 0/0 | 0/0 | match | match | match |
| 108971 | TruSeqV2    | 8:143994806 | missense | A/A | 2.95E-13 | 83  | 99 | 33 | 90 | 0/0 | 0/0 | 0/0 | match | match | match |
| 115239 | TruSeqV2    | 8:143994806 | missense | A/A | 1.17E-10 | 47  | 99 | 14 | 36 | 0/0 | 0/0 | 0/0 | match | match | match |
| 132306 | Agilent38MB | 8:143994806 | missense | A/A | 7.04E-12 | 37  | 99 | 15 | 42 | 0/0 | 0/0 | 0/0 | match | match | match |
| 163383 | TruSeqV2    | 8:143994806 | missense | A/A | 9.81E-12 | 63  | 99 | 35 | 99 | 0/0 | 0/0 | 0/0 | match | match | match |
| 198564 | Agilent38MB | 8:143994806 | missense | A/A | 1.30E-06 | 67  | 99 | 38 | 99 | 0/0 | 0/0 | 0/0 | match | match | match |
| 108971 | TruSeqV2    | 8:143995743 | synon    | C/C | 2.66E-15 | 168 | 99 | 41 | 99 | 0/0 | 0/0 | 0/0 | match | match | match |
| 115239 | TruSeqV2    | 8:143995743 | synon    | T/C | 5.55E-15 | 108 | 99 | 19 | 99 | 0/1 | 0/1 | 0/1 | match | match | match |
| 132306 | Agilent38MB | 8:143995743 | synon    | T/C | 1.27E-14 | 74  | 99 | 35 | 99 | 0/1 | 0/1 | 0/1 | match | match | match |
| 163383 | TruSeqV2    | 8:143995743 | synon    | C/C | 8.88E-16 | 132 | 99 | 26 | 75 | 0/0 | 0/0 | 0/0 | match | match | match |
| 198564 | Agilent38MB | 8:143995743 | synon    | T/C | 6.66E-15 | 152 | 99 | 32 | 99 | 0/1 | 0/1 | 0/1 | match | match | match |
| 108971 | TruSeqV2    | 8:143995761 | synon    | T/T | 1.50E-13 | 166 | 99 | 43 | 99 | 1/1 | 1/1 | 1/1 | match | match | match |
| 115239 | TruSeqV2    | 8:143995761 | synon    | T/T | 1.59E-08 | 107 | 99 | 22 | 66 | 1/1 | 1/1 | 1/1 | match | match | match |
| 132306 | Agilent38MB | 8:143995761 | synon    | T/T | 8.73E-14 | 58  | 99 | 34 | 99 | 1/1 | 1/1 | 1/1 | match | match | match |
| 163383 | TruSeqV2    | 8:143995761 | synon    | T/T | 4.67E-12 | 122 | 99 | 28 | 84 | 1/1 | 1/1 | 1/1 | match | match | match |
| 198564 | Agilent38MB | 8:143995761 | synon    | T/T | 4.77E-10 | 121 | 99 | 35 | 99 | 1/1 | 1/1 | 1/1 | match | match | match |
| 108971 | TruSeqV2    | 8:143999146 | synon    | C/C | 6.66E-16 | 127 | 99 | 31 | 92 | 0/0 | 0/0 | 0/0 | match | match | match |
| 115239 | TruSeqV2    | 8:143999146 | synon    | C/C | 8.88E-16 | 85  | 99 | 15 | 39 | 0/0 | 0/0 | 0/0 | match | match | match |

|        |             |             |          |     |          |     |    |    |    |     |     |     |       |       |       |
|--------|-------------|-------------|----------|-----|----------|-----|----|----|----|-----|-----|-----|-------|-------|-------|
| 132306 | Agilent38MB | 8:143999146 | synon    | C/C | 8.88E-16 | 114 | 99 | 27 | 72 | 0/0 | 0/0 | 0/0 | match | match | match |
| 163383 | TruSeqV2    | 8:143999146 | synon    | C/C | 8.88E-16 | 109 | 99 | 38 | 96 | 0/0 | 0/0 | 0/0 | match | match | match |
| 198564 | Agilent38MB | 8:143999146 | synon    | C/C | 6.66E-16 | 215 | 99 | 38 | 87 | 0/0 | 0/0 | 0/0 | match | match | match |
| 108971 | TruSeqV2    | 8:18067575  | intronic | A/A | 2.22E-16 | 173 | 99 | 42 | 99 | 0/0 | 0/0 | 0/0 | match | match | match |
| 115239 | TruSeqV2    | 8:18067575  | intronic | A/A | 2.22E-16 | 97  | 99 | 23 | 69 | 0/0 | 0/0 | 0/0 | match | match | match |
| 163383 | TruSeqV2    | 8:18067575  | intronic | A/A | 2.22E-16 | 135 | 99 | 36 | 87 | 0/0 | 0/0 | 0/0 | match | match | match |
| 108971 | TruSeqV2    | 8:18079213  | intronic | C/C | 4.44E-16 | 1   | 3  | 42 | 99 | 0/0 | 0/0 | 0/0 | match | match | match |
| 163383 | TruSeqV2    | 8:18079213  | intronic | C/C | 2.22E-16 | 1   | 3  | 44 | 99 | 0/0 | 0/0 | 0/0 | match | match | match |
| 108971 | TruSeqV2    | 8:18079517  | intronic | A/A | 4.44E-16 | 96  | 99 | 40 | 99 | 0/0 | 0/0 | 0/0 | match | match | match |
| 115239 | TruSeqV2    | 8:18079517  | intronic | A/T | 3.31E-14 | 68  | 99 | 39 | 99 | 0/1 | 0/1 | 0/1 | match | match | match |
| 132306 | Agilent38MB | 8:18079517  | intronic | A/A | 2.22E-16 | 107 | 99 | 38 | 99 | 0/0 | 0/0 | 0/0 | match | match | match |
| 163383 | TruSeqV2    | 8:18079517  | intronic | A/A | 4.44E-16 | 87  | 99 | 46 | 99 | 0/0 | 0/0 | 0/0 | match | match | match |
| 198564 | Agilent38MB | 8:18079517  | intronic | A/A | 2.44E-15 | 216 | 99 | 55 | 99 | 0/0 | 0/0 | 0/0 | match | match | match |
| 108971 | TruSeqV2    | 8:18079577  | synon    | T/T | 4.44E-16 | 201 | 99 | 46 | 99 | 0/0 | 0/0 | 0/0 | match | match | match |
| 115239 | TruSeqV2    | 8:18079577  | synon    | T/T | 6.66E-16 | 135 | 99 | 35 | 99 | 0/0 | 0/0 | 0/0 | match | match | match |
| 132306 | Agilent38MB | 8:18079577  | synon    | T/T | 4.44E-16 | 319 | 99 | 44 | 99 | 0/0 | 0/0 | 0/0 | match | match | match |
| 163383 | TruSeqV2    | 8:18079577  | synon    | T/T | 4.44E-16 | 183 | 99 | 60 | 99 | 0/0 | 0/0 | 0/0 | match | match | match |
| 198564 | Agilent38MB | 8:18079577  | synon    | T/T | 1.04E-14 | 587 | 99 | 58 | 99 | 0/0 | 0/0 | 0/0 | match | match | match |
| 108971 | TruSeqV2    | 8:18079653  | stop     | C/C | 2.22E-16 | 373 | 99 | 42 | 99 | 0/0 | 0/0 | 0/0 | match | match | match |
| 115239 | TruSeqV2    | 8:18079653  | stop     | C/C | 2.22E-16 | 217 | 99 | 43 | 99 | 0/0 | 0/0 | 0/0 | match | match | match |
| 132306 | Agilent38MB | 8:18079653  | stop     | C/C | 2.22E-16 | 300 | 99 | 31 | 90 | 0/0 | 0/0 | 0/0 | match | match | match |
| 163383 | TruSeqV2    | 8:18079653  | stop     | C/C | 2.22E-16 | 271 | 99 | 34 | 75 | 0/0 | 0/0 | 0/0 | match | match | match |
| 198564 | Agilent38MB | 8:18079653  | stop     | C/C | 2.22E-16 | 553 | 99 | 46 | 99 | 0/0 | 0/0 | 0/0 | match | match | match |
| 108971 | TruSeqV2    | 8:18079746  | missense | C/C | 1.11E-15 | 473 | 99 | 45 | 99 | 0/0 | 0/0 | 0/0 | match | match | match |
| 115239 | TruSeqV2    | 8:18079746  | missense | C/C | 6.66E-16 | 287 | 99 | 26 | 63 | 0/0 | 0/0 | 0/0 | match | match | match |
| 132306 | Agilent38MB | 8:18079746  | missense | C/C | 1.33E-15 | 223 | 99 | 31 | 75 | 0/0 | 0/0 | 0/0 | match | match | match |
| 163383 | TruSeqV2    | 8:18079746  | missense | C/C | 2.44E-15 | 373 | 99 | 43 | 99 | 0/0 | 0/0 | 0/0 | match | match | match |
| 198564 | Agilent38MB | 8:18079746  | missense | C/C | 3.33E-15 | 385 | 99 | 48 | 99 | 0/0 | 0/0 | 0/0 | match | match | match |
| 108971 | TruSeqV2    | 8:18079919  | synon    | C/C | 4.44E-16 | 400 | 99 | 36 | 99 | 0/0 | 0/0 | 0/0 | match | match | match |
| 115239 | TruSeqV2    | 8:18079919  | synon    | C/C | 2.22E-16 | 241 | 99 | 46 | 99 | 0/0 | 0/0 | 0/0 | match | match | match |
| 132306 | Agilent38MB | 8:18079919  | synon    | C/C | 4.44E-16 | 65  | 99 | 29 | 63 | 0/0 | 0/0 | 0/0 | match | match | match |
| 163383 | TruSeqV2    | 8:18079919  | synon    | C/C | 2.22E-16 | 285 | 99 | 45 | 99 | 0/0 | 0/0 | 0/0 | match | match | match |
| 198564 | Agilent38MB | 8:18079919  | synon    | C/C | 2.22E-16 | 108 | 99 | 47 | 99 | 0/0 | 0/0 | 0/0 | match | match | match |
| 108971 | TruSeqV2    | 8:18080001  | missense | G/G | 4.44E-15 | 201 | 99 | 64 | 99 | 0/0 | 0/0 | 0/0 | match | match | match |
| 115239 | TruSeqV2    | 8:18080001  | missense | A/G | 1.06E-13 | 150 | 99 | 32 | 99 | 0/1 | 0/1 | 0/1 | match | match | match |
| 132306 | Agilent38MB | 8:18080001  | missense | G/G | 8.88E-16 | 52  | 99 | 30 | 84 | 0/0 | 0/0 | 0/0 | match | match | match |
| 163383 | TruSeqV2    | 8:18080001  | missense | G/G | 6.66E-16 | 199 | 99 | 49 | 99 | 0/0 | 0/0 | 0/0 | match | match | match |
| 198564 | Agilent38MB | 8:18080001  | missense | G/G | 3.95E-14 | 88  | 99 | 49 | 99 | 0/0 | 0/0 | 0/0 | match | match | match |

|        |             |            |          |     |          |     |    |    |    |     |     |     |       |       |       |
|--------|-------------|------------|----------|-----|----------|-----|----|----|----|-----|-----|-----|-------|-------|-------|
| 108971 | TruSeqV2    | 8:18080015 | synon    | G/G | 2.00E-15 | 165 | 99 | 60 | 99 | 0/0 | 0/0 | 0/0 | match | match | match |
| 115239 | TruSeqV2    | 8:18080015 | synon    | A/G | 1.09E-09 | 116 | 99 | 32 | 99 | 0/1 | 0/1 | 0/1 | match | match | match |
| 132306 | Agilent38MB | 8:18080015 | synon    | G/G | 1.78E-15 | 67  | 99 | 30 | 81 | 0/0 | 0/0 | 0/0 | match | match | match |
| 163383 | TruSeqV2    | 8:18080015 | synon    | G/G | 8.88E-16 | 178 | 99 | 46 | 99 | 0/0 | 0/0 | 0/0 | match | match | match |
| 198564 | Agilent38MB | 8:18080015 | synon    | G/G | 4.44E-16 | 109 | 99 | 56 | 99 | 0/0 | 0/0 | 0/0 | match | match | match |
| 108971 | TruSeqV2    | 8:18080115 | stop     | C/C | 4.44E-16 | 114 | 99 | 49 | 99 | 0/0 | 0/0 | 0/0 | match | match | match |
| 115239 | TruSeqV2    | 8:18080115 | stop     | C/C | 8.88E-16 | 69  | 99 | 49 | 99 | 0/0 | 0/0 | 0/0 | match | match | match |
| 132306 | Agilent38MB | 8:18080115 | stop     | C/C | 2.22E-16 | 105 | 99 | 44 | 99 | 0/0 | 0/0 | 0/0 | match | match | match |
| 163383 | TruSeqV2    | 8:18080115 | stop     | C/C | 8.88E-16 | 92  | 99 | 45 | 99 | 0/0 | 0/0 | 0/0 | match | match | match |
| 198564 | Agilent38MB | 8:18080115 | stop     | C/C | 6.66E-15 | 179 | 99 | 56 | 99 | 0/0 | 0/0 | 0/0 | match | match | match |
| 108971 | TruSeqV2    | 8:18080116 | missense | G/G | 4.44E-16 | 113 | 99 | 49 | 99 | 0/0 | 0/0 | 0/0 | match | match | match |
| 115239 | TruSeqV2    | 8:18080116 | missense | G/G | 6.66E-16 | 68  | 99 | 50 | 99 | 0/0 | 0/0 | 0/0 | match | match | match |
| 132306 | Agilent38MB | 8:18080116 | missense | G/G | 4.44E-16 | 105 | 99 | 44 | 99 | 0/0 | 0/0 | 0/0 | match | match | match |
| 163383 | TruSeqV2    | 8:18080116 | missense | G/G | 2.44E-15 | 95  | 99 | 45 | 99 | 0/0 | 0/0 | 0/0 | match | match | match |
| 198564 | Agilent38MB | 8:18080116 | missense | G/G | 1.44E-14 | 177 | 99 | 52 | 99 | 0/0 | 0/0 | 0/0 | match | match | match |
| 108971 | TruSeqV2    | 8:18080176 | missense | C/C | 2.22E-16 | 103 | 99 | 32 | 87 | 0/0 | 0/0 | 0/0 | match | match | match |
| 115239 | TruSeqV2    | 8:18080176 | missense | C/C | 1.33E-15 | 66  | 99 | 57 | 99 | 0/0 | 0/0 | 0/0 | match | match | match |
| 132306 | Agilent38MB | 8:18080176 | missense | C/C | 2.22E-16 | 230 | 99 | 44 | 99 | 0/0 | 0/0 | 0/0 | match | match | match |
| 163383 | TruSeqV2    | 8:18080176 | missense | C/C | 4.44E-16 | 103 | 99 | 41 | 99 | 0/0 | 0/0 | 0/0 | match | match | match |
| 198564 | Agilent38MB | 8:18080176 | missense | C/C | 1.33E-15 | 330 | 99 | 44 | 99 | 0/0 | 0/0 | 0/0 | match | match | match |
| 108971 | TruSeqV2    | 8:18080196 | missense | T/T | 6.66E-16 | 104 | 99 | 36 | 90 | 0/0 | 0/0 | 0/0 | match | match | match |
| 115239 | TruSeqV2    | 8:18080196 | missense | G/T | 2.31E-14 | 62  | 99 | 51 | 99 | 0/1 | 0/1 | 0/1 | match | match | match |
| 132306 | Agilent38MB | 8:18080196 | missense | T/T | 4.44E-16 | 197 | 99 | 41 | 99 | 0/0 | 0/0 | 0/0 | match | match | match |
| 163383 | TruSeqV2    | 8:18080196 | missense | T/T | 8.88E-16 | 96  | 99 | 45 | 99 | 0/0 | 0/0 | 0/0 | match | match | match |
| 198564 | Agilent38MB | 8:18080196 | missense | T/T | 6.44E-15 | 279 | 99 | 49 | 99 | 0/0 | 0/0 | 0/0 | match | match | match |
| 108971 | TruSeqV2    | 8:18080308 | missense | A/A | 2.22E-16 | 76  | 99 | 56 | 99 | 0/0 | 0/0 | 0/0 | match | match | match |
| 115239 | TruSeqV2    | 8:18080308 | missense | A/A | 4.44E-16 | 42  | 99 | 32 | 90 | 0/0 | 0/0 | 0/0 | match | match | match |
| 132306 | Agilent38MB | 8:18080308 | missense | A/A | 2.22E-16 | 41  | 90 | 29 | 87 | 0/0 | 0/0 | 0/0 | match | match | match |
| 163383 | TruSeqV2    | 8:18080308 | missense | A/A | 4.44E-16 | 74  | 99 | 49 | 99 | 0/0 | 0/0 | 0/0 | match | match | match |
| 198564 | Agilent38MB | 8:18080308 | missense | A/A | 6.66E-16 | 42  | 99 | 51 | 99 | 0/0 | 0/0 | 0/0 | match | match | match |
| 108971 | TruSeqV2    | 8:18080333 | synon    | T/T | 6.66E-16 | 60  | 99 | 53 | 99 | 0/0 | 0/0 | 0/0 | match | match | match |
| 115239 | TruSeqV2    | 8:18080333 | synon    | T/T | 6.66E-16 | 34  | 81 | 37 | 99 | 0/0 | 0/0 | 0/0 | match | match | match |
| 132306 | Agilent38MB | 8:18080333 | synon    | T/T | 4.44E-16 | 28  | 63 | 29 | 75 | 0/0 | 0/0 | 0/0 | match | match | match |
| 163383 | TruSeqV2    | 8:18080333 | synon    | T/T | 4.44E-16 | 60  | 99 | 43 | 99 | 0/0 | 0/0 | 0/0 | match | match | match |
| 198564 | Agilent38MB | 8:18080333 | synon    | T/T | 4.44E-16 | 40  | 90 | 46 | 99 | 0/0 | 0/0 | 0/0 | match | match | match |
| 108971 | TruSeqV2    | 8:18080440 | 3'UTR    | A/A | 6.66E-16 | 11  | 24 | 50 | 99 | 0/0 | 0/0 | 0/0 | match | match | match |
| 115239 | TruSeqV2    | 8:18080440 | 3'UTR    | A/A | 8.88E-16 | 8   | 18 | 51 | 99 | 0/0 | 0/0 | 0/0 | match | match | match |
| 132306 | Agilent38MB | 8:18080440 | 3'UTR    | A/A | 4.44E-16 | 33  | 66 | 38 | 96 | 0/0 | 0/0 | 0/0 | match | match | match |



|        |             |            |          |     |          |     |    |    |    |     |     |     |       |       |       |
|--------|-------------|------------|----------|-----|----------|-----|----|----|----|-----|-----|-----|-------|-------|-------|
| 163383 | TruSeqV2    | 8:18080440 | 3'UTR    | A/A | 4.44E-16 | 13  | 36 | 45 | 99 | 0/0 | 0/0 | 0/0 | match | match | match |
| 198564 | Agilent38MB | 8:18080440 | 3'UTR    | A/A | 2.42E-14 | 87  | 99 | 64 | 99 | 0/0 | 0/0 | 0/0 | match | match | match |
| 108971 | TruSeqV2    | 8:18080487 | 3'UTR    | C/C | 2.22E-16 | 7   | 18 | 42 | 99 | 0/0 | 0/0 | 0/0 | match | match | match |
| 115239 | TruSeqV2    | 8:18080487 | 3'UTR    | C/C | 2.22E-16 | 4   | 9  | 48 | 99 | 0/0 | 0/0 | 0/0 | match | match | match |
| 132306 | Agilent38MB | 8:18080487 | 3'UTR    | C/C | 4.44E-16 | 3   | 6  | 32 | 81 | 0/0 | 0/0 | 0/0 | match | match | match |
| 163383 | TruSeqV2    | 8:18080487 | 3'UTR    | C/C | 1.11E-15 | 9   | 24 | 47 | 99 | 0/0 | 0/0 | 0/0 | match | match | match |
| 198564 | Agilent38MB | 8:18080487 | 3'UTR    | C/C | 2.22E-16 | 21  | 51 | 50 | 99 | 0/0 | 0/0 | 0/0 | match | match | match |
| 108971 | TruSeqV2    | 8:18080532 | 3'UTR    | A/A | 6.66E-16 | 5   | 6  | 45 | 99 | 0/0 | 0/0 | 0/0 | match | match | match |
| 115239 | TruSeqV2    | 8:18080532 | 3'UTR    | A/A | 6.66E-16 | 5   | 6  | 45 | 99 | 0/0 | 0/0 | 0/0 | match | match | match |
| 132306 | Agilent38MB | 8:18080532 | 3'UTR    | A/A | 2.22E-16 | 5   | 6  | 45 | 99 | 0/0 | 0/0 | 0/0 | match | match | match |
| 163383 | TruSeqV2    | 8:18080532 | 3'UTR    | A/A | 4.44E-16 | 5   | 6  | 45 | 99 | 0/0 | 0/0 | 0/0 | match | match | match |
| 198564 | Agilent38MB | 8:18080532 | 3'UTR    | A/A | 9.55E-15 | 5   | 6  | 45 | 99 | 0/0 | 0/0 | 0/0 | match | match | match |
| 108971 | TruSeqV2    | 8:18080747 | 3'UTR    | G/T | 1.33E-15 | 23  | 99 | 40 | 99 | 0/1 | 0/1 | 0/1 | match | match | match |
| 115239 | TruSeqV2    | 8:18080747 | 3'UTR    | G/T | 2.00E-15 | 16  | 99 | 42 | 99 | 0/1 | 0/1 | 0/1 | match | match | match |
| 163383 | TruSeqV2    | 8:18080747 | 3'UTR    | G/G | 2.22E-15 | 27  | 81 | 38 | 99 | 1/1 | 1/1 | 1/1 | match | match | match |
| 108971 | TruSeqV2    | 8:18257624 | synon    | T/T | 4.44E-16 | 325 | 99 | 41 | 99 | 0/0 | 0/0 | 0/0 | match | match | match |
| 115239 | TruSeqV2    | 8:18257624 | synon    | T/T | 6.66E-16 | 204 | 99 | 37 | 99 | 0/0 | 0/0 | 0/0 | match | match | match |
| 132306 | Agilent38MB | 8:18257624 | synon    | T/T | 2.22E-16 | 248 | 99 | 28 | 81 | 0/0 | 0/0 | 0/0 | match | match | match |
| 163383 | TruSeqV2    | 8:18257624 | synon    | T/T | 2.22E-16 | 307 | 99 | 40 | 99 | 0/0 | 0/0 | 0/0 | match | match | match |
| 198564 | Agilent38MB | 8:18257624 | synon    | T/T | 6.24E-14 | 379 | 99 | 43 | 99 | 0/0 | 0/0 | 0/0 | match | match | match |
| 108971 | TruSeqV2    | 8:18257703 | missense | C/C | 1.73E-14 | 372 | 99 | 50 | 99 | 0/0 | 0/0 | 0/0 | match | match | match |
| 115239 | TruSeqV2    | 8:18257703 | missense | C/C | 5.55E-15 | 204 | 99 | 20 | 45 | 0/0 | 0/0 | 0/0 | match | match | match |
| 132306 | Agilent38MB | 8:18257703 | missense | C/C | 1.11E-15 | 159 | 99 | 30 | 87 | 0/0 | 0/0 | 0/0 | match | match | match |
| 163383 | TruSeqV2    | 8:18257703 | missense | C/C | 2.44E-15 | 299 | 99 | 41 | 99 | 0/0 | 0/0 | 0/0 | match | match | match |
| 198564 | Agilent38MB | 8:18257703 | missense | C/C | 7.11E-15 | 261 | 99 | 39 | 99 | 0/0 | 0/0 | 0/0 | match | match | match |
| 108971 | TruSeqV2    | 8:18257704 | missense | G/G | 6.66E-16 | 371 | 99 | 54 | 99 | 0/0 | 0/0 | 0/0 | match | match | match |
| 115239 | TruSeqV2    | 8:18257704 | missense | G/G | 2.22E-16 | 208 | 99 | 23 | 52 | 0/0 | 0/0 | 0/0 | match | match | match |
| 132306 | Agilent38MB | 8:18257704 | missense | G/G | 4.44E-16 | 162 | 99 | 30 | 81 | 0/0 | 0/0 | 0/0 | match | match | match |
| 163383 | TruSeqV2    | 8:18257704 | missense | G/G | 2.22E-16 | 301 | 99 | 40 | 99 | 0/0 | 0/0 | 0/0 | match | match | match |
| 198564 | Agilent38MB | 8:18257704 | missense | G/G | 2.22E-16 | 271 | 99 | 40 | 99 | 0/0 | 0/0 | 0/0 | match | match | match |
| 108971 | TruSeqV2    | 8:18257795 | synon    | C/C | 4.17E-14 | 323 | 99 | 43 | 99 | 0/0 | 0/0 | 0/0 | match | match | match |
| 115239 | TruSeqV2    | 8:18257795 | synon    | C/T | 2.99E-11 | 180 | 99 | 35 | 99 | 0/1 | 0/1 | 0/1 | match | match | match |
| 132306 | Agilent38MB | 8:18257795 | synon    | C/C | 7.11E-15 | 107 | 99 | 35 | 90 | 0/0 | 0/0 | 0/0 | match | match | match |
| 163383 | TruSeqV2    | 8:18257795 | synon    | C/T | 1.21E-13 | 267 | 99 | 36 | 99 | 0/1 | 0/1 | 0/1 | match | match | match |
| 198564 | Agilent38MB | 8:18257795 | synon    | C/T | 1.26E-10 | 175 | 99 | 40 | 99 | 0/1 | 0/1 | 0/1 | match | match | match |
| 108971 | TruSeqV2    | 8:18257854 | missense | C/C | 2.22E-15 | 269 | 99 | 46 | 99 | 1/1 | 1/1 | 1/1 | match | match | match |
| 115239 | TruSeqV2    | 8:18257854 | missense | T/T | 4.44E-16 | 183 | 99 | 37 | 90 | 0/0 | 0/0 | 0/0 | match | match | match |
| 132306 | Agilent38MB | 8:18257854 | missense | T/T | 8.88E-16 | 67  | 99 | 37 | 99 | 0/0 | 0/0 | 0/0 | match | match | match |

|        |             |            |          |     |          |     |    |    |    |     |     |     |       |       |       |
|--------|-------------|------------|----------|-----|----------|-----|----|----|----|-----|-----|-----|-------|-------|-------|
| 163383 | TruSeqV2    | 8:18257854 | missense | T/T | 6.66E-16 | 224 | 99 | 30 | 69 | 0/0 | 0/0 | 0/0 | match | match | match |
| 198564 | Agilent38MB | 8:18257854 | missense | C/T | 4.22E-15 | 79  | 99 | 41 | 99 | 0/1 | 0/1 | 0/1 | match | match | match |
| 108971 | TruSeqV2    | 8:18257877 | missense | G/G | 4.44E-16 | 268 | 99 | 44 | 99 | 0/0 | 0/0 | 0/0 | match | match | match |
| 115239 | TruSeqV2    | 8:18257877 | missense | G/G | 4.44E-16 | 177 | 99 | 29 | 72 | 0/0 | 0/0 | 0/0 | match | match | match |
| 132306 | Agilent38MB | 8:18257877 | missense | G/G | 4.44E-16 | 44  | 99 | 35 | 99 | 0/0 | 0/0 | 0/0 | match | match | match |
| 163383 | TruSeqV2    | 8:18257877 | missense | G/G | 4.44E-16 | 230 | 99 | 24 | 71 | 0/0 | 0/0 | 0/0 | match | match | match |
| 198564 | Agilent38MB | 8:18257877 | missense | G/G | 1.78E-15 | 73  | 99 | 34 | 93 | 0/0 | 0/0 | 0/0 | match | match | match |
| 108971 | TruSeqV2    | 8:18257924 | missense | A/A | 1.33E-15 | 169 | 99 | 44 | 99 | 0/0 | 0/0 | 0/0 | match | match | match |
| 115239 | TruSeqV2    | 8:18257924 | missense | A/A | 8.88E-16 | 118 | 99 | 38 | 99 | 0/0 | 0/0 | 0/0 | match | match | match |
| 132306 | Agilent38MB | 8:18257924 | missense | A/A | 2.89E-15 | 35  | 93 | 34 | 84 | 0/0 | 0/0 | 0/0 | match | match | match |
| 163383 | TruSeqV2    | 8:18257924 | missense | A/A | 5.33E-15 | 154 | 99 | 34 | 84 | 0/0 | 0/0 | 0/0 | match | match | match |
| 198564 | Agilent38MB | 8:18257924 | missense | A/A | 3.11E-15 | 44  | 99 | 42 | 99 | 0/0 | 0/0 | 0/0 | match | match | match |
| 108971 | TruSeqV2    | 8:18257947 | missense | A/A | 2.44E-15 | 146 | 99 | 37 | 99 | 0/0 | 0/0 | 0/0 | match | match | match |
| 115239 | TruSeqV2    | 8:18257947 | missense | A/A | 8.88E-16 | 104 | 99 | 43 | 99 | 0/0 | 0/0 | 0/0 | match | match | match |
| 132306 | Agilent38MB | 8:18257947 | missense | A/A | 4.44E-16 | 52  | 99 | 30 | 60 | 0/0 | 0/0 | 0/0 | match | match | match |
| 163383 | TruSeqV2    | 8:18257947 | missense | A/A | 8.88E-16 | 131 | 99 | 32 | 84 | 0/0 | 0/0 | 0/0 | match | match | match |
| 198564 | Agilent38MB | 8:18257947 | missense | A/A | 3.77E-15 | 81  | 99 | 37 | 99 | 0/0 | 0/0 | 0/0 | match | match | match |
| 108971 | TruSeqV2    | 8:18257994 | synon    | T/T | 2.00E-15 | 84  | 52 | 44 | 99 | 1/1 | 1/1 | 1/1 | match | match | match |
| 115239 | TruSeqV2    | 8:18257994 | synon    | C/C | 2.22E-16 | 66  | 99 | 43 | 99 | 0/0 | 0/0 | 0/0 | match | match | match |
| 132306 | Agilent38MB | 8:18257994 | synon    | C/C | 6.66E-16 | 65  | 99 | 30 | 81 | 0/0 | 0/0 | 0/0 | match | match | match |
| 163383 | TruSeqV2    | 8:18257994 | synon    | C/C | 1.55E-15 | 91  | 99 | 34 | 90 | 0/0 | 0/0 | 0/0 | match | match | match |
| 198564 | Agilent38MB | 8:18257994 | synon    | C/T | 4.44E-15 | 121 | 99 | 46 | 99 | 0/1 | 0/1 | 0/1 | match | match | match |
| 108971 | TruSeqV2    | 8:18258012 | missense | G/G | 4.18E-07 | 83  | 99 | 47 | 99 | 0/0 | 0/0 | 0/0 | match | match | match |
| 115239 | TruSeqV2    | 8:18258012 | missense | G/G | 4.44E-16 | 55  | 99 | 42 | 99 | 0/0 | 0/0 | 0/0 | match | match | match |
| 132306 | Agilent38MB | 8:18258012 | missense | G/G | 6.66E-16 | 69  | 99 | 36 | 90 | 0/0 | 0/0 | 0/0 | match | match | match |
| 163383 | TruSeqV2    | 8:18258012 | missense | G/G | 8.88E-16 | 84  | 99 | 35 | 99 | 0/0 | 0/0 | 0/0 | match | match | match |
| 198564 | Agilent38MB | 8:18258012 | missense | G/G | 4.88E-15 | 111 | 99 | 46 | 99 | 0/0 | 0/0 | 0/0 | match | match | match |
| 108971 | TruSeqV2    | 8:18258103 | missense | G/G | 1.11E-15 | 102 | 99 | 44 | 99 | 0/0 | 0/0 | 0/0 | match | match | match |
| 115239 | TruSeqV2    | 8:18258103 | missense | A/G | 3.14E-13 | 59  | 99 | 37 | 99 | 0/1 | 0/1 | 0/1 | match | match | match |
| 132306 | Agilent38MB | 8:18258103 | missense | G/G | 1.11E-15 | 159 | 99 | 43 | 99 | 0/0 | 0/0 | 0/0 | match | match | match |
| 163383 | TruSeqV2    | 8:18258103 | missense | A/G | 1.64E-14 | 86  | 99 | 40 | 99 | 0/1 | 0/1 | 0/1 | match | match | match |
| 198564 | Agilent38MB | 8:18258103 | missense | A/G | 2.06E-13 | 221 | 99 | 46 | 99 | 0/1 | 0/1 | 0/1 | match | match | match |
| 108971 | TruSeqV2    | 8:18258272 | synon    | C/C | 4.44E-16 | 91  | 99 | 36 | 99 | 0/0 | 0/0 | 0/0 | match | match | match |
| 115239 | TruSeqV2    | 8:18258272 | synon    | C/C | 2.22E-16 | 63  | 99 | 47 | 99 | 0/0 | 0/0 | 0/0 | match | match | match |
| 132306 | Agilent38MB | 8:18258272 | synon    | C/C | 1.55E-15 | 33  | 81 | 38 | 96 | 0/0 | 0/0 | 0/0 | match | match | match |
| 163383 | TruSeqV2    | 8:18258272 | synon    | C/C | 2.22E-16 | 88  | 99 | 34 | 93 | 0/0 | 0/0 | 0/0 | match | match | match |
| 198564 | Agilent38MB | 8:18258272 | synon    | C/C | 6.66E-16 | 35  | 66 | 46 | 99 | 0/0 | 0/0 | 0/0 | match | match | match |
| 108971 | TruSeqV2    | 8:18258316 | missense | G/G | 7.55E-15 | 110 | 99 | 41 | 99 | 0/0 | 0/0 | 0/0 | match | match | match |

|        |             |            |          |     |          |     |    |    |    |     |     |     |       |       |       |
|--------|-------------|------------|----------|-----|----------|-----|----|----|----|-----|-----|-----|-------|-------|-------|
| 115239 | TruSeqV2    | 8:18258316 | missense | A/A | 6.66E-16 | 58  | 99 | 32 | 96 | 1/1 | 1/1 | 1/1 | match | match | match |
| 132306 | Agilent38MB | 8:18258316 | missense | A/A | 6.66E-16 | 24  | 72 | 31 | 93 | 1/1 | 1/1 | 1/1 | match | match | match |
| 163383 | TruSeqV2    | 8:18258316 | missense | A/A | 8.88E-16 | 95  | 99 | 33 | 99 | 1/1 | 1/1 | 1/1 | match | match | match |
| 198564 | Agilent38MB | 8:18258316 | missense | A/G | 5.40E-14 | 64  | 99 | 33 | 99 | 0/1 | 0/1 | 0/1 | match | match | match |
| 108971 | TruSeqV2    | 8:18258358 | missense | A/A | 2.22E-16 | 118 | 99 | 36 | 96 | 0/0 | 0/0 | 0/0 | match | match | match |
| 115239 | TruSeqV2    | 8:18258358 | missense | A/A | 6.66E-16 | 73  | 99 | 30 | 81 | 0/0 | 0/0 | 0/0 | match | match | match |
| 132306 | Agilent38MB | 8:18258358 | missense | A/A | 2.22E-16 | 59  | 99 | 29 | 84 | 0/0 | 0/0 | 0/0 | match | match | match |
| 163383 | TruSeqV2    | 8:18258358 | missense | A/A | 6.66E-16 | 97  | 99 | 32 | 78 | 0/0 | 0/0 | 0/0 | match | match | match |
| 198564 | Agilent38MB | 8:18258358 | missense | A/A | 4.44E-16 | 143 | 99 | 44 | 99 | 0/0 | 0/0 | 0/0 | match | match | match |
| 108971 | TruSeqV2    | 8:18258370 | missense | G/G | 1.11E-15 | 115 | 99 | 43 | 99 | 0/0 | 0/0 | 0/0 | match | match | match |
| 115239 | TruSeqV2    | 8:18258370 | missense | G/G | 1.78E-15 | 71  | 99 | 33 | 93 | 0/0 | 0/0 | 0/0 | match | match | match |
| 132306 | Agilent38MB | 8:18258370 | missense | G/G | 2.22E-16 | 63  | 99 | 33 | 87 | 0/0 | 0/0 | 0/0 | match | match | match |
| 163383 | TruSeqV2    | 8:18258370 | missense | G/G | 4.44E-16 | 95  | 99 | 27 | 66 | 0/0 | 0/0 | 0/0 | match | match | match |
| 198564 | Agilent38MB | 8:18258370 | missense | G/G | 3.55E-15 | 140 | 99 | 42 | 99 | 0/0 | 0/0 | 0/0 | match | match | match |
| 108971 | TruSeqV2    | 8:18258372 | missense | T/T | 8.88E-16 | 113 | 99 | 45 | 99 | 0/0 | 0/0 | 0/0 | match | match | match |
| 115239 | TruSeqV2    | 8:18258372 | missense | T/T | 6.66E-16 | 71  | 99 | 35 | 96 | 0/0 | 0/0 | 0/0 | match | match | match |
| 132306 | Agilent38MB | 8:18258372 | missense | T/T | 2.00E-15 | 62  | 99 | 33 | 87 | 0/0 | 0/0 | 0/0 | match | match | match |
| 163383 | TruSeqV2    | 8:18258372 | missense | T/T | 4.44E-16 | 96  | 99 | 27 | 63 | 0/0 | 0/0 | 0/0 | match | match | match |
| 198564 | Agilent38MB | 8:18258372 | missense | T/T | 8.88E-16 | 141 | 99 | 42 | 99 | 0/0 | 0/0 | 0/0 | match | match | match |
| 132306 | Agilent38MB | 8:27348788 | synon    | C/C | 1.33E-15 | 15  | 27 | 1  | 0  | 0/0 | 0/0 | 0/0 | match | match | match |
| 198564 | Agilent38MB | 8:27348788 | synon    | C/C | 9.33E-15 | 16  | 24 | 16 | 45 | 0/0 | 0/0 | 0/0 | match | match | match |
| 108971 | TruSeqV2    | 8:27358505 | missense | A/A | 2.22E-16 | 122 | 99 | 34 | 90 | 0/0 | 0/0 | 0/0 | match | match | match |
| 115239 | TruSeqV2    | 8:27358505 | missense | A/A | 4.44E-16 | 97  | 99 | 33 | 90 | 0/0 | 0/0 | 0/0 | match | match | match |
| 132306 | Agilent38MB | 8:27358505 | missense | A/A | 4.44E-16 | 93  | 99 | 32 | 93 | 0/0 | 0/0 | 0/0 | match | match | match |
| 163383 | TruSeqV2    | 8:27358505 | missense | A/A | 2.22E-16 | 117 | 99 | 30 | 87 | 0/0 | 0/0 | 0/0 | match | match | match |
| 198564 | Agilent38MB | 8:27358505 | missense | A/A | 2.22E-16 | 154 | 99 | 34 | 84 | 0/0 | 0/0 | 0/0 | match | match | match |
| 108971 | TruSeqV2    | 8:27361241 | missense | C/C | 4.44E-16 | 200 | 99 | 40 | 99 | 0/0 | 0/0 | 0/0 | match | match | match |
| 115239 | TruSeqV2    | 8:27361241 | missense | C/C | 2.22E-16 | 144 | 99 | 32 | 0  | 0/0 | 0/0 | 0/0 | match | match | match |
| 132306 | Agilent38MB | 8:27361241 | missense | C/C | 4.44E-16 | 130 | 99 | 32 | 90 | 0/0 | 0/0 | 0/0 | match | match | match |
| 163383 | TruSeqV2    | 8:27361241 | missense | C/C | 4.44E-16 | 169 | 99 | 35 | 90 | 0/0 | 0/0 | 0/0 | match | match | match |
| 198564 | Agilent38MB | 8:27361241 | missense | C/C | 4.44E-16 | 263 | 99 | 45 | 99 | 0/0 | 0/0 | 0/0 | match | match | match |
| 108971 | TruSeqV2    | 8:27362587 | missense | G/G | 2.22E-16 | 150 | 99 | 36 | 93 | 0/0 | 0/0 | 0/0 | match | match | match |
| 115239 | TruSeqV2    | 8:27362587 | missense | G/G | 4.44E-16 | 92  | 99 | 31 | 81 | 0/0 | 0/0 | 0/0 | match | match | match |
| 132306 | Agilent38MB | 8:27362587 | missense | G/G | 2.22E-16 | 95  | 99 | 37 | 96 | 0/0 | 0/0 | 0/0 | match | match | match |
| 163383 | TruSeqV2    | 8:27362587 | missense | G/G | 2.22E-16 | 99  | 99 | 35 | 61 | 0/0 | 0/0 | 0/0 | match | match | match |
| 198564 | Agilent38MB | 8:27362587 | missense | G/G | 6.00E-15 | 186 | 99 | 32 | 96 | 0/0 | 0/0 | 0/0 | match | match | match |
| 108971 | TruSeqV2    | 8:27364505 | synon    | A/A | 1.78E-15 | 54  | 99 | 36 | 90 | 0/0 | 0/0 | 0/0 | match | match | match |
| 115239 | TruSeqV2    | 8:27364505 | synon    | A/A | 2.22E-16 | 54  | 99 | 36 | 90 | 0/0 | 0/0 | 0/0 | match | match | match |

|        |             |             |          |     |          |     |    |     |    |     |     |     |       |       |       |
|--------|-------------|-------------|----------|-----|----------|-----|----|-----|----|-----|-----|-----|-------|-------|-------|
| 132306 | Agilent38MB | 8:27364505  | synon    | A/A | 2.22E-15 | 54  | 99 | 36  | 90 | 0/0 | 0/0 | 0/0 | match | match | match |
| 163383 | TruSeqV2    | 8:27364505  | synon    | A/A | 2.22E-16 | 54  | 99 | 36  | 90 | 0/0 | 0/0 | 0/0 | match | match | match |
| 198564 | Agilent38MB | 8:27364505  | synon    | A/A | 2.22E-16 | 54  | 99 | 36  | 90 | 0/0 | 0/0 | 0/0 | match | match | match |
| 108971 | TruSeqV2    | 8:59403576  | 3'UTR    | C/C | 5.89E-12 | 4   | 9  | 33  | 87 | 0/0 | 0/0 | 0/0 | match | match | match |
| 163383 | TruSeqV2    | 8:59403576  | 3'UTR    | C/C | 2.38E-14 | 4   | 9  | 44  | 99 | 0/0 | 0/0 | 0/0 | match | match | match |
| 108971 | TruSeqV2    | 8:59407065  | missense | C/C | 4.44E-16 | 87  | 99 | 66  | 99 | 0/0 | 0/0 | 0/0 | match | match | match |
| 115239 | TruSeqV2    | 8:59407065  | missense | C/C | 6.66E-16 | 66  | 99 | 42  | 99 | 0/0 | 0/0 | 0/0 | match | match | match |
| 132306 | Agilent38MB | 8:59407065  | missense | C/C | 2.22E-16 | 176 | 99 | 36  | 90 | 0/0 | 0/0 | 0/0 | match | match | match |
| 163383 | TruSeqV2    | 8:59407065  | missense | C/C | 6.66E-16 | 99  | 99 | 34  | 78 | 0/0 | 0/0 | 0/0 | match | match | match |
| 198564 | Agilent38MB | 8:59407065  | missense | C/C | 8.67E-13 | 330 | 99 | 46  | 99 | 0/0 | 0/0 | 0/0 | match | match | match |
| 108971 | TruSeqV2    | 8:59409373  | missense | T/T | 4.44E-16 | 248 | 99 | 37  | 99 | 0/0 | 0/0 | 0/0 | match | match | match |
| 115239 | TruSeqV2    | 8:59409373  | missense | T/T | 6.66E-16 | 159 | 99 | 43  | 99 | 0/0 | 0/0 | 0/0 | match | match | match |
| 132306 | Agilent38MB | 8:59409373  | missense | T/T | 4.44E-16 | 39  | 93 | 27  | 69 | 0/0 | 0/0 | 0/0 | match | match | match |
| 163383 | TruSeqV2    | 8:59409373  | missense | T/T | 1.11E-15 | 211 | 99 | 45  | 99 | 0/0 | 0/0 | 0/0 | match | match | match |
| 198564 | Agilent38MB | 8:59409373  | missense | T/T | 1.11E-15 | 84  | 99 | 40  | 99 | 0/0 | 0/0 | 0/0 | match | match | match |
| 163383 | TruSeqV2    | 8:59412924  | promoter | T/G | 6.66E-16 | 3   | 30 | 49  | 99 | 0/1 | 0/1 | 0/1 | match | match | match |
| 132306 | Agilent38MB | 8:59417753  | promoter | G/G | 6.88E-15 | 5   | 15 | 35  | 99 | 1/1 | 1/1 | 1/1 | match | match | match |
| 108971 | TruSeqV2    | 8:65509150  | 3'UTR    | G/G | 4.44E-16 | 74  | 99 | 44  | 99 | 0/0 | 0/0 | 0/0 | match | match | match |
| 115239 | TruSeqV2    | 8:65509150  | 3'UTR    | G/G | 4.44E-16 | 39  | 99 | 50  | 99 | 0/0 | 0/0 | 0/0 | match | match | match |
| 132306 | Agilent38MB | 8:65509150  | 3'UTR    | G/G | 4.44E-16 | 6   | 18 | 47  | 99 | 0/0 | 0/0 | 0/0 | match | match | match |
| 163383 | TruSeqV2    | 8:65509150  | 3'UTR    | G/G | 6.66E-16 | 69  | 99 | 59  | 99 | 0/0 | 0/0 | 0/0 | match | match | match |
| 198564 | Agilent38MB | 8:65509150  | 3'UTR    | G/G | 8.88E-16 | 6   | 18 | 52  | 99 | 0/0 | 0/0 | 0/0 | match | match | match |
| 108971 | TruSeqV2    | 8:70584628  | 3'UTR    | T/C | 1.33E-15 | 38  | 99 | 52  | 99 | 0/1 | 0/1 | 0/1 | match | match | match |
| 115239 | TruSeqV2    | 8:70584628  | 3'UTR    | C/C | 6.66E-16 | 29  | 45 | 41  | 36 | 1/1 | 1/1 | 1/1 | match | match | match |
| 163383 | TruSeqV2    | 8:70584628  | 3'UTR    | T/C | 8.88E-16 | 29  | 99 | 52  | 99 | 0/1 | 0/1 | 0/1 | match | match | match |
| 108971 | TruSeqV2    | 8:70584809  | 3'UTR    | T/G | 4.44E-16 | 142 | 99 | 39  | 99 | 0/1 | 0/1 | 0/1 | match | match | match |
| 115239 | TruSeqV2    | 8:70584809  | 3'UTR    | T/T | 4.44E-16 | 104 | 99 | 40  | 76 | 0/0 | 0/0 | 0/0 | match | match | match |
| 163383 | TruSeqV2    | 8:70584809  | 3'UTR    | G/G | 3.55E-15 | 120 | 99 | 30  | 89 | 1/1 | 1/1 | 1/1 | match | match | match |
| 108971 | TruSeqV2    | 8:70744812  | missense | G/A | 1.32E-11 | 68  | 99 | 27  | 99 | 0/1 | 0/1 | 0/1 | match | match | match |
| 115239 | TruSeqV2    | 8:70744812  | missense | G/A | 1.78E-15 | 40  | 99 | 9   | 99 | 0/1 | 0/1 | 0/1 | match | match | match |
| 132306 | Agilent38MB | 8:70744812  | missense | G/A | 3.77E-15 | 31  | 99 | 29  | 99 | 0/1 | 0/1 | 0/1 | match | match | match |
| 163383 | TruSeqV2    | 8:70744812  | missense | G/A | 1.78E-15 | 56  | 99 | 29  | 99 | 0/1 | 0/1 | 0/1 | match | match | match |
| 198564 | Agilent38MB | 8:70744812  | missense | G/A | 3.11E-15 | 59  | 99 | 34  | 99 | 0/1 | 0/1 | 0/1 | match | match | match |
| 115239 | TruSeqV2    | 8:70745171  | 5'UTR    | C/A | 1.78E-15 | 4   | 37 | 8   | 63 | 0/1 | 0/1 | 0/1 | match | match | match |
| 163383 | TruSeqV2    | 8:70745171  | 5'UTR    | C/C | 2.03E-07 | 5   | 15 | 14  | 33 | 0/0 | 0/0 | 0/0 | match | match | match |
| 108971 | TruSeqV2    | 9:117086027 | missense | T/T | 6.66E-11 | 918 | 99 | 180 | 99 | 0/0 | 0/0 | 0/0 | match | match | match |
| 115239 | TruSeqV2    | 9:117086027 | missense | T/T | 2.46E-14 | 129 | 99 | 26  | 36 | 0/0 | 0/0 | 0/0 | match | match | match |
| 132306 | Agilent38MB | 9:117086027 | missense | T/T | 2.71E-13 | 137 | 99 | 37  | 99 | 0/0 | 0/0 | 0/0 | match | match | match |

|        |             |             |          |     |          |      |    |     |    |     |     |     |       |       |       |
|--------|-------------|-------------|----------|-----|----------|------|----|-----|----|-----|-----|-----|-------|-------|-------|
| 163383 | TruSeqV2    | 9:117086027 | missense | T/T | 1.88E-12 | 153  | 99 | 30  | 84 | 0/0 | 0/0 | 0/0 | match | match | match |
| 198564 | Agilent38MB | 9:117086027 | missense | T/T | 7.19E-14 | 266  | 99 | 37  | 99 | 0/0 | 0/0 | 0/0 | match | match | match |
| 108971 | TruSeqV2    | 9:117086329 | synon    | C/C | 1.28E-12 | 413  | 99 | 176 | 99 | 0/0 | 0/0 | 0/0 | match | match | match |
| 115239 | TruSeqV2    | 9:117086329 | synon    | C/C | 6.66E-16 | 72   | 99 | 41  | 99 | 0/0 | 0/0 | 0/0 | match | match | match |
| 132306 | Agilent38MB | 9:117086329 | synon    | C/C | 2.22E-16 | 242  | 99 | 32  | 87 | 0/0 | 0/0 | 0/0 | match | match | match |
| 163383 | TruSeqV2    | 9:117086329 | synon    | C/C | 4.44E-16 | 104  | 99 | 35  | 93 | 0/0 | 0/0 | 0/0 | match | match | match |
| 198564 | Agilent38MB | 9:117086329 | synon    | C/C | 6.66E-16 | 486  | 99 | 42  | 99 | 0/0 | 0/0 | 0/0 | match | match | match |
| 108971 | TruSeqV2    | 9:117087099 | synon    | C/C | 7.77E-15 | 1000 | 99 | 167 | 99 | 0/0 | 0/0 | 0/0 | match | match | match |
| 115239 | TruSeqV2    | 9:117087099 | synon    | C/C | 6.66E-16 | 157  | 99 | 25  | 66 | 0/0 | 0/0 | 0/0 | match | match | match |
| 132306 | Agilent38MB | 9:117087099 | synon    | C/C | 4.44E-16 | 111  | 99 | 46  | 99 | 0/0 | 0/0 | 0/0 | match | match | match |
| 163383 | TruSeqV2    | 9:117087099 | synon    | C/C | 6.66E-16 | 182  | 99 | 45  | 99 | 0/0 | 0/0 | 0/0 | match | match | match |
| 198564 | Agilent38MB | 9:117087099 | synon    | C/C | 7.99E-15 | 201  | 99 | 48  | 99 | 0/0 | 0/0 | 0/0 | match | match | match |
| 108971 | TruSeqV2    | 9:117087125 | stop     | C/C | 1.30E-13 | 1031 | 99 | 153 | 99 | 0/0 | 0/0 | 0/0 | match | match | match |
| 115239 | TruSeqV2    | 9:117087125 | stop     | C/C | 4.44E-16 | 164  | 99 | 27  | 78 | 0/0 | 0/0 | 0/0 | match | match | match |
| 132306 | Agilent38MB | 9:117087125 | stop     | C/C | 6.66E-16 | 142  | 99 | 45  | 99 | 0/0 | 0/0 | 0/0 | match | match | match |
| 163383 | TruSeqV2    | 9:117087125 | stop     | C/C | 8.88E-16 | 185  | 99 | 50  | 99 | 0/0 | 0/0 | 0/0 | match | match | match |
| 198564 | Agilent38MB | 9:117087125 | stop     | C/C | 8.88E-16 | 273  | 99 | 44  | 99 | 0/0 | 0/0 | 0/0 | match | match | match |
| 108971 | TruSeqV2    | 9:117093110 | missense | T/T | 6.66E-16 | 176  | 99 | 41  | 99 | 0/0 | 0/0 | 0/0 | match | match | match |
| 115239 | TruSeqV2    | 9:117093110 | missense | T/T | 8.88E-16 | 126  | 99 | 43  | 99 | 0/0 | 0/0 | 0/0 | match | match | match |
| 132306 | Agilent38MB | 9:117093110 | missense | T/T | 6.44E-15 | 137  | 99 | 33  | 87 | 0/0 | 0/0 | 0/0 | match | match | match |
| 163383 | TruSeqV2    | 9:117093110 | missense | T/T | 6.66E-16 | 153  | 99 | 39  | 89 | 0/0 | 0/0 | 0/0 | match | match | match |
| 198564 | Agilent38MB | 9:117093110 | missense | T/T | 1.78E-15 | 325  | 99 | 42  | 99 | 0/0 | 0/0 | 0/0 | match | match | match |
| 108971 | TruSeqV2    | 9:117093939 | missense | G/G | 2.22E-16 | 193  | 99 | 37  | 99 | 0/0 | 0/0 | 0/0 | match | match | match |
| 115239 | TruSeqV2    | 9:117093939 | missense | G/G | 2.22E-16 | 136  | 99 | 19  | 48 | 0/0 | 0/0 | 0/0 | match | match | match |
| 132306 | Agilent38MB | 9:117093939 | missense | G/G | 4.44E-16 | 198  | 99 | 31  | 63 | 0/0 | 0/0 | 0/0 | match | match | match |
| 163383 | TruSeqV2    | 9:117093939 | missense | G/G | 6.66E-16 | 151  | 99 | 26  | 72 | 0/0 | 0/0 | 0/0 | match | match | match |
| 198564 | Agilent38MB | 9:117093939 | missense | G/G | 1.55E-14 | 372  | 99 | 39  | 99 | 0/0 | 0/0 | 0/0 | match | match | match |
| 108971 | TruSeqV2    | 9:137328286 | intronic | A/G | 3.16E-12 | 53   | 99 | 39  | 99 | 0/1 | 0/1 | 0/1 | match | match | match |
| 115239 | TruSeqV2    | 9:137328286 | intronic | A/G | 1.42E-07 | 31   | 99 | 22  | 99 | 0/1 | 0/1 | 0/1 | match | match | match |
| 132306 | Agilent38MB | 9:137328286 | intronic | A/A | 1.64E-14 | 103  | 99 | 27  | 81 | 1/1 | 1/1 | 1/1 | match | match | match |
| 163383 | TruSeqV2    | 9:137328286 | intronic | A/A | 4.44E-15 | 26   | 78 | 32  | 95 | 1/1 | 1/1 | 1/1 | match | match | match |
| 198564 | Agilent38MB | 9:137328286 | intronic | A/A | 2.00E-15 | 192  | 99 | 31  | 92 | 1/1 | 1/1 | 1/1 | match | match | match |
| 108971 | TruSeqV2    | 9:137329930 | 3'UTR    | C/C | 6.44E-15 | 150  | 99 | 26  | 72 | 0/0 | 0/0 | 0/0 | match | match | match |
| 115239 | TruSeqV2    | 9:137329930 | 3'UTR    | C/C | 1.20E-14 | 138  | 99 | 12  | 30 | 0/0 | 0/0 | 0/0 | match | match | match |
| 132306 | Agilent38MB | 9:137329930 | 3'UTR    | C/C | 1.55E-15 | 2    | 6  | 22  | 63 | 0/0 | 0/0 | 0/0 | match | match | match |
| 163383 | TruSeqV2    | 9:137329930 | 3'UTR    | C/C | 8.88E-16 | 100  | 99 | 18  | 42 | 0/0 | 0/0 | 0/0 | match | match | match |
| 198564 | Agilent38MB | 9:137329930 | 3'UTR    | C/C | 2.89E-15 | 2    | 6  | 30  | 81 | 0/0 | 0/0 | 0/0 | match | match | match |
| 108971 | TruSeqV2    | 9:137330562 | 3'UTR    | G/G | 1.37E-12 | 46   | 99 | 40  | 99 | 0/0 | 0/0 | 0/0 | match | match | match |

|        |             |             |           |     |          |     |    |    |    |     |     |     |       |       |       |
|--------|-------------|-------------|-----------|-----|----------|-----|----|----|----|-----|-----|-----|-------|-------|-------|
| 115239 | TruSeqV2    | 9:137330562 | 3'UTR     | G/G | 1.40E-12 | 29  | 54 | 10 | 21 | 0/0 | 0/0 | 0/0 | match | match | match |
| 163383 | TruSeqV2    | 9:137330562 | 3'UTR     | G/G | 7.49E-12 | 41  | 99 | 43 | 99 | 0/0 | 0/0 | 0/0 | match | match | match |
| 198564 | Agilent38MB | 9:137330562 | 3'UTR     | G/G | 4.79E-10 | 1   | 2  | 51 | 99 | 0/0 | 0/0 | 0/0 | match | match | match |
| 108971 | TruSeqV2    | 9:137331525 | 3'UTR     | G/G | 4.22E-15 | 146 | 99 | 33 | 70 | 0/0 | 0/0 | 0/0 | match | match | match |
| 115239 | TruSeqV2    | 9:137331525 | 3'UTR     | G/G | 1.11E-15 | 105 | 99 | 15 | 42 | 0/0 | 0/0 | 0/0 | match | match | match |
| 163383 | TruSeqV2    | 9:137331525 | 3'UTR     | G/G | 6.66E-16 | 122 | 99 | 25 | 75 | 0/0 | 0/0 | 0/0 | match | match | match |
| 108971 | TruSeqV2    | 9:75520910  | missense  | A/A | 8.88E-16 | 106 | 99 | 39 | 99 | 0/0 | 0/0 | 0/0 | match | match | match |
| 115239 | TruSeqV2    | 9:75520910  | missense  | A/A | 8.88E-16 | 58  | 99 | 40 | 99 | 0/0 | 0/0 | 0/0 | match | match | match |
| 132306 | Agilent38MB | 9:75520910  | missense  | A/A | 4.44E-16 | 100 | 99 | 41 | 99 | 0/0 | 0/0 | 0/0 | match | match | match |
| 163383 | TruSeqV2    | 9:75520910  | missense  | A/A | 6.66E-16 | 115 | 99 | 44 | 99 | 0/0 | 0/0 | 0/0 | match | match | match |
| 198564 | Agilent38MB | 9:75520910  | missense  | A/A | 1.55E-15 | 168 | 99 | 51 | 99 | 0/0 | 0/0 | 0/0 | match | match | match |
| 108971 | TruSeqV2    | 9:75524647  | stop/miss | A/A | 1.55E-15 | 100 | 99 | 45 | 99 | 0/0 | 0/0 | 0/0 | match | match | match |
| 115239 | TruSeqV2    | 9:75524647  | stop/miss | A/A | 4.44E-16 | 100 | 99 | 45 | 99 | 0/0 | 0/0 | 0/0 | match | match | match |
| 132306 | Agilent38MB | 9:75524647  | stop/miss | A/A | 2.22E-15 | 100 | 99 | 45 | 99 | 0/0 | 0/0 | 0/0 | match | match | match |
| 163383 | TruSeqV2    | 9:75524647  | stop/miss | A/A | 8.88E-16 | 100 | 99 | 45 | 99 | 0/0 | 0/0 | 0/0 | match | match | match |
| 198564 | Agilent38MB | 9:75524647  | stop/miss | A/A | 4.44E-16 | 100 | 99 | 45 | 99 | 0/0 | 0/0 | 0/0 | match | match | match |
| 108971 | TruSeqV2    | 9:75540504  | missense  | T/T | 8.88E-16 | 82  | 99 | 51 | 99 | 0/0 | 0/0 | 0/0 | match | match | match |
| 115239 | TruSeqV2    | 9:75540504  | missense  | T/T | 8.88E-16 | 45  | 99 | 38 | 99 | 0/0 | 0/0 | 0/0 | match | match | match |
| 132306 | Agilent38MB | 9:75540504  | missense  | T/T | 6.66E-16 | 99  | 99 | 53 | 99 | 0/0 | 0/0 | 0/0 | match | match | match |
| 163383 | TruSeqV2    | 9:75540504  | missense  | T/T | 2.22E-15 | 95  | 99 | 33 | 93 | 0/0 | 0/0 | 0/0 | match | match | match |
| 198564 | Agilent38MB | 9:75540504  | missense  | T/T | 4.03E-13 | 179 | 99 | 55 | 99 | 0/0 | 0/0 | 0/0 | match | match | match |
| 108971 | TruSeqV2    | 9:75543888  | missense  | T/T | 4.88E-15 | 153 | 99 | 41 | 99 | 0/0 | 0/0 | 0/0 | match | match | match |
| 115239 | TruSeqV2    | 9:75543888  | missense  | T/T | 7.11E-15 | 100 | 99 | 45 | 99 | 0/0 | 0/0 | 0/0 | match | match | match |
| 132306 | Agilent38MB | 9:75543888  | missense  | T/T | 6.88E-15 | 159 | 99 | 40 | 99 | 0/0 | 0/0 | 0/0 | match | match | match |
| 163383 | TruSeqV2    | 9:75543888  | missense  | T/T | 7.99E-15 | 90  | 99 | 44 | 99 | 0/0 | 0/0 | 0/0 | match | match | match |
| 198564 | Agilent38MB | 9:75543888  | missense  | T/T | 6.66E-16 | 319 | 99 | 52 | 99 | 0/0 | 0/0 | 0/0 | match | match | match |
| 108971 | TruSeqV2    | 9:75545882  | synon     | G/G | 6.66E-16 | 170 | 99 | 57 | 99 | 0/0 | 0/0 | 0/0 | match | match | match |
| 115239 | TruSeqV2    | 9:75545882  | synon     | G/A | 8.88E-16 | 107 | 99 | 34 | 99 | 0/1 | 0/1 | 0/1 | match | match | match |
| 132306 | Agilent38MB | 9:75545882  | synon     | G/A | 8.88E-16 | 66  | 99 | 32 | 99 | 0/1 | 0/1 | 0/1 | match | match | match |
| 163383 | TruSeqV2    | 9:75545882  | synon     | G/A | 8.88E-16 | 152 | 99 | 30 | 99 | 0/1 | 0/1 | 0/1 | match | match | match |
| 198564 | Agilent38MB | 9:75545882  | synon     | G/G | 4.44E-16 | 129 | 99 | 51 | 99 | 0/0 | 0/0 | 0/0 | match | match | match |
| 108971 | TruSeqV2    | 9:86900926  | synon     | G/A | 2.38E-14 | 108 | 99 | 28 | 99 | 0/1 | 0/1 | 0/1 | match | match | match |
| 115239 | TruSeqV2    | 9:86900926  | synon     | G/A | 2.13E-14 | 101 | 99 | 29 | 99 | 0/1 | 0/1 | 0/1 | match | match | match |
| 132306 | Agilent38MB | 9:86900926  | synon     | G/G | 6.66E-16 | 82  | 99 | 25 | 69 | 0/0 | 0/0 | 0/0 | match | match | match |
| 163383 | TruSeqV2    | 9:86900926  | synon     | G/G | 4.44E-16 | 127 | 99 | 26 | 51 | 0/0 | 0/0 | 0/0 | match | match | match |
| 198564 | Agilent38MB | 9:86900926  | synon     | G/G | 2.66E-15 | 155 | 99 | 27 | 69 | 0/0 | 0/0 | 0/0 | match | match | match |
| 108971 | TruSeqV2    | 9:86905096  | synon     | G/G | 2.22E-15 | 139 | 99 | 47 | 99 | 0/0 | 0/0 | 0/0 | match | match | match |
| 115239 | TruSeqV2    | 9:86905096  | synon     | G/G | 2.44E-15 | 98  | 99 | 39 | 99 | 0/0 | 0/0 | 0/0 | match | match | match |

|        |             |             |          |     |          |     |    |    |    |     |     |     |       |       |       |
|--------|-------------|-------------|----------|-----|----------|-----|----|----|----|-----|-----|-----|-------|-------|-------|
| 132306 | Agilent38MB | 9:86905096  | synon    | G/G | 6.66E-16 | 163 | 99 | 32 | 84 | 0/0 | 0/0 | 0/0 | match | match | match |
| 163383 | TruSeqV2    | 9:86905096  | synon    | G/G | 8.88E-16 | 116 | 99 | 33 | 90 | 0/0 | 0/0 | 0/0 | match | match | match |
| 198564 | Agilent38MB | 9:86905096  | synon    | G/G | 1.92E-13 | 312 | 99 | 56 | 99 | 0/0 | 0/0 | 0/0 | match | match | match |
| 108971 | TruSeqV2    | 9:86917301  | missense | T/T | 4.44E-16 | 109 | 99 | 36 | 99 | 0/0 | 0/0 | 0/0 | match | match | match |
| 115239 | TruSeqV2    | 9:86917301  | missense | T/T | 4.44E-16 | 92  | 99 | 37 | 93 | 0/0 | 0/0 | 0/0 | match | match | match |
| 132306 | Agilent38MB | 9:86917301  | missense | T/T | 6.66E-16 | 25  | 63 | 27 | 58 | 0/0 | 0/0 | 0/0 | match | match | match |
| 163383 | TruSeqV2    | 9:86917301  | missense | T/T | 6.66E-16 | 102 | 99 | 27 | 69 | 0/0 | 0/0 | 0/0 | match | match | match |
| 198564 | Agilent38MB | 9:86917301  | missense | T/T | 2.22E-16 | 63  | 99 | 42 | 99 | 0/0 | 0/0 | 0/0 | match | match | match |
| 108971 | TruSeqV2    | 9:86920236  | synon    | T/C | 6.59E-14 | 85  | 99 | 36 | 99 | 0/1 | 0/1 | 0/1 | match | match | match |
| 115239 | TruSeqV2    | 9:86920236  | synon    | T/C | 6.66E-16 | 55  | 99 | 38 | 99 | 0/1 | 0/1 | 0/1 | match | match | match |
| 132306 | Agilent38MB | 9:86920236  | synon    | T/T | 1.53E-14 | 131 | 99 | 29 | 84 | 0/0 | 0/0 | 0/0 | match | match | match |
| 163383 | TruSeqV2    | 9:86920236  | synon    | T/T | 4.00E-15 | 74  | 99 | 43 | 99 | 0/0 | 0/0 | 0/0 | match | match | match |
| 198564 | Agilent38MB | 9:86920236  | synon    | T/T | 1.11E-15 | 264 | 99 | 40 | 99 | 0/0 | 0/0 | 0/0 | match | match | match |
| 108971 | TruSeqV2    | 9:86928334  | synon    | T/T | 2.22E-16 | 92  | 99 | 51 | 99 | 0/0 | 0/0 | 0/0 | match | match | match |
| 115239 | TruSeqV2    | 9:86928334  | synon    | T/T | 4.44E-16 | 63  | 99 | 42 | 99 | 0/0 | 0/0 | 0/0 | match | match | match |
| 132306 | Agilent38MB | 9:86928334  | synon    | T/T | 6.66E-16 | 137 | 99 | 32 | 90 | 0/0 | 0/0 | 0/0 | match | match | match |
| 163383 | TruSeqV2    | 9:86928334  | synon    | T/T | 4.44E-16 | 80  | 99 | 37 | 99 | 0/0 | 0/0 | 0/0 | match | match | match |
| 198564 | Agilent38MB | 9:86928334  | synon    | T/T | 1.49E-14 | 218 | 99 | 45 | 99 | 0/0 | 0/0 | 0/0 | match | match | match |
| 108971 | TruSeqV2    | 9:86955535  | missense | C/C | 2.24E-14 | 118 | 99 | 32 | 96 | 0/0 | 0/0 | 0/0 | match | match | match |
| 115239 | TruSeqV2    | 9:86955535  | missense | C/C | 2.22E-15 | 88  | 99 | 40 | 99 | 0/0 | 0/0 | 0/0 | match | match | match |
| 132306 | Agilent38MB | 9:86955535  | missense | C/C | 2.34E-13 | 175 | 99 | 26 | 66 | 0/0 | 0/0 | 0/0 | match | match | match |
| 163383 | TruSeqV2    | 9:86955535  | missense | C/C | 4.02E-14 | 110 | 99 | 46 | 99 | 0/0 | 0/0 | 0/0 | match | match | match |
| 198564 | Agilent38MB | 9:86955535  | missense | C/C | 9.46E-13 | 385 | 99 | 43 | 99 | 0/0 | 0/0 | 0/0 | match | match | match |
| 132306 | Agilent38MB | 9:86983368  | 5'UTR    | T/T | 1.33E-15 | 1   | 3  | 39 | 99 | 0/0 | 0/0 | 0/0 | match | match | match |
| 108971 | TruSeqV2    | X:105277591 | missense | G   | 4.00E-15 | 120 | 99 | 21 | 54 | 0/0 | 0/0 | 0/0 | match | match | match |
| 115239 | TruSeqV2    | X:105277591 | missense | G   | 7.11E-15 | 90  | 99 | 32 | 75 | 0/0 | 0/0 | 0/0 | match | match | match |
| 132306 | Agilent38MB | X:105277591 | missense | G   | 2.22E-16 | 34  | 84 | 9  | 27 | 0/0 | 0/0 | 0/0 | match | match | match |
| 163383 | TruSeqV2    | X:105277591 | missense | G   | 2.22E-16 | 110 | 99 | 19 | 48 | 0/0 | 0/0 | 0/0 | match | match | match |
| 198564 | Agilent38MB | X:105277591 | missense | G   | 3.89E-14 | 46  | 99 | 24 | 66 | 0/0 | 0/0 | 0/0 | match | match | match |
| 108971 | TruSeqV2    | X:105279368 | missense | C   | 2.22E-16 | 51  | 99 | 23 | 56 | 0/0 | 0/0 | 0/0 | match | match | match |
| 115239 | TruSeqV2    | X:105279368 | missense | C   | 4.44E-16 | 33  | 93 | 26 | 69 | 0/0 | 0/0 | 0/0 | match | match | match |
| 132306 | Agilent38MB | X:105279368 | missense | C   | 2.22E-16 | 55  | 99 | 14 | 36 | 0/0 | 0/0 | 0/0 | match | match | match |
| 163383 | TruSeqV2    | X:105279368 | missense | C   | 6.66E-16 | 40  | 99 | 13 | 30 | 0/0 | 0/0 | 0/0 | match | match | match |
| 198564 | Agilent38MB | X:105279368 | missense | C   | 2.00E-15 | 97  | 99 | 18 | 53 | 0/0 | 0/0 | 0/0 | match | match | match |
| 108971 | TruSeqV2    | X:105280653 | missense | C   | 2.22E-16 | 88  | 99 | 17 | 42 | 0/0 | 0/0 | 0/0 | match | match | match |
| 115239 | TruSeqV2    | X:105280653 | missense | C   | 2.22E-16 | 71  | 99 | 25 | 63 | 0/0 | 0/0 | 0/0 | match | match | match |
| 132306 | Agilent38MB | X:105280653 | missense | C   | 4.44E-16 | 45  | 99 | 12 | 36 | 0/0 | 0/0 | 0/0 | match | match | match |
| 163383 | TruSeqV2    | X:105280653 | missense | C   | 4.44E-16 | 87  | 99 | 27 | 75 | 0/0 | 0/0 | 0/0 | match | match | match |

|        |             |             |          |   |          |     |    |    |    |     |     |     |       |       |       |
|--------|-------------|-------------|----------|---|----------|-----|----|----|----|-----|-----|-----|-------|-------|-------|
| 198564 | Agilent38MB | X:105280653 | missense | C | 2.22E-16 | 85  | 99 | 26 | 69 | 0/0 | 0/0 | 0/0 | match | match | match |
| 108971 | TruSeqV2    | X:105280703 | missense | A | 8.88E-16 | 71  | 99 | 15 | 45 | 0/0 | 0/0 | 0/0 | match | match | match |
| 115239 | TruSeqV2    | X:105280703 | missense | A | 4.44E-16 | 64  | 99 | 24 | 63 | 0/0 | 0/0 | 0/0 | match | match | match |
| 132306 | Agilent38MB | X:105280703 | missense | A | 4.44E-16 | 29  | 60 | 15 | 39 | 0/0 | 0/0 | 0/0 | match | match | match |
| 163383 | TruSeqV2    | X:105280703 | missense | A | 1.11E-15 | 89  | 99 | 23 | 63 | 0/0 | 0/0 | 0/0 | match | match | match |
| 198564 | Agilent38MB | X:105280703 | missense | A | 8.88E-16 | 57  | 99 | 17 | 51 | 0/0 | 0/0 | 0/0 | match | match | match |
| 108971 | TruSeqV2    | X:105280906 | missense | G | 1.26E-13 | 136 | 99 | 24 | 59 | 0/0 | 0/0 | 0/0 | match | match | match |
| 115239 | TruSeqV2    | X:105280906 | missense | G | 4.66E-15 | 106 | 99 | 17 | 48 | 0/0 | 0/0 | 0/0 | match | match | match |
| 132306 | Agilent38MB | X:105280906 | missense | G | 3.77E-15 | 231 | 99 | 15 | 45 | 0/0 | 0/0 | 0/0 | match | match | match |
| 163383 | TruSeqV2    | X:105280906 | missense | G | 2.22E-14 | 105 | 99 | 15 | 42 | 0/0 | 0/0 | 0/0 | match | match | match |
| 198564 | Agilent38MB | X:105280906 | missense | G | 1.79E-11 | 382 | 99 | 23 | 66 | 0/0 | 0/0 | 0/0 | match | match | match |
| 108971 | TruSeqV2    | X:105280923 | missense | A | 4.44E-16 | 158 | 99 | 21 | 51 | 0/0 | 0/0 | 0/0 | match | match | match |
| 115239 | TruSeqV2    | X:105280923 | missense | A | 1.55E-15 | 117 | 99 | 18 | 48 | 0/0 | 0/0 | 0/0 | match | match | match |
| 132306 | Agilent38MB | X:105280923 | missense | A | 2.22E-16 | 260 | 99 | 15 | 42 | 0/0 | 0/0 | 0/0 | match | match | match |
| 163383 | TruSeqV2    | X:105280923 | missense | A | 3.55E-15 | 128 | 99 | 19 | 51 | 0/0 | 0/0 | 0/0 | match | match | match |
| 198564 | Agilent38MB | X:105280923 | missense | A | 1.40E-14 | 404 | 99 | 21 | 51 | 0/0 | 0/0 | 0/0 | match | match | match |
| 108971 | TruSeqV2    | X:105280995 | missense | G | 6.66E-16 | 191 | 99 | 20 | 51 | 0/0 | 0/0 | 0/0 | match | match | match |
| 115239 | TruSeqV2    | X:105280995 | missense | G | 4.44E-16 | 139 | 99 | 24 | 69 | 0/0 | 0/0 | 0/0 | match | match | match |
| 132306 | Agilent38MB | X:105280995 | missense | G | 2.22E-16 | 152 | 99 | 18 | 48 | 0/0 | 0/0 | 0/0 | match | match | match |
| 163383 | TruSeqV2    | X:105280995 | missense | G | 1.11E-15 | 170 | 99 | 28 | 69 | 0/0 | 0/0 | 0/0 | match | match | match |
| 198564 | Agilent38MB | X:105280995 | missense | G | 8.88E-16 | 241 | 99 | 19 | 48 | 0/0 | 0/0 | 0/0 | match | match | match |
| 108971 | TruSeqV2    | X:153760484 | missense | C | 8.88E-16 | 104 | 99 | 12 | 27 | 0/0 | 0/0 | 0/0 | match | match | match |
| 115239 | TruSeqV2    | X:153760484 | missense | C | 8.88E-16 | 79  | 99 | 6  | 18 | 0/0 | 0/0 | 0/0 | match | match | match |
| 132306 | Agilent38MB | X:153760484 | missense | C | 1.33E-15 | 26  | 63 | 13 | 36 | 0/0 | 0/0 | 0/0 | match | match | match |
| 163383 | TruSeqV2    | X:153760484 | missense | C | 6.66E-16 | 89  | 99 | 11 | 30 | 0/0 | 0/0 | 0/0 | match | match | match |
| 198564 | Agilent38MB | X:153760484 | missense | C | 1.11E-15 | 48  | 96 | 15 | 36 | 0/0 | 0/0 | 0/0 | match | match | match |
| 108971 | TruSeqV2    | X:153761205 | missense | C | 8.88E-16 | 64  | 99 | 12 | 30 | 0/0 | 0/0 | 0/0 | match | match | match |
| 115239 | TruSeqV2    | X:153761205 | missense | C | 8.88E-16 | 37  | 99 | 2  | 6  | 0/0 | 0/0 | 0/0 | match | match | match |
| 132306 | Agilent38MB | X:153761205 | missense | C | 1.78E-15 | 13  | 21 | 12 | 36 | 0/0 | 0/0 | 0/0 | match | match | match |
| 163383 | TruSeqV2    | X:153761205 | missense | C | 4.66E-15 | 43  | 99 | 19 | 48 | 0/0 | 0/0 | 0/0 | match | match | match |
| 198564 | Agilent38MB | X:153761205 | missense | C | 6.22E-15 | 35  | 60 | 25 | 66 | 0/0 | 0/0 | 0/0 | match | match | match |
| 108971 | TruSeqV2    | X:153762634 | missense | G | 1.11E-15 | 56  | 99 | 20 | 59 | 0/0 | 0/0 | 0/0 | match | match | match |
| 115239 | TruSeqV2    | X:153762634 | missense | G | 5.33E-15 | 52  | 99 | 4  | 9  | 0/0 | 0/0 | 0/0 | match | match | match |
| 132306 | Agilent38MB | X:153762634 | missense | G | 1.11E-15 | 61  | 99 | 18 | 54 | 0/0 | 0/0 | 0/0 | match | match | match |
| 163383 | TruSeqV2    | X:153762634 | missense | G | 3.11E-15 | 48  | 99 | 21 | 57 | 0/0 | 0/0 | 0/0 | match | match | match |
| 198564 | Agilent38MB | X:153762634 | missense | G | 6.91E-13 | 97  | 99 | 21 | 42 | 0/0 | 0/0 | 0/0 | match | match | match |
| 108971 | TruSeqV2    | X:153763492 | missense | T | 4.33E-06 | 89  | 99 | 21 | 51 | 0/0 | 0/0 | 0/0 | match | match | match |
| 115239 | TruSeqV2    | X:153763492 | missense | T | 1.11E-15 | 58  | 99 | 3  | 9  | 0/0 | 0/0 | 0/0 | match | match | match |



|        |             |             |          |   |          |     |    |    |    |     |     |     |       |       |       |
|--------|-------------|-------------|----------|---|----------|-----|----|----|----|-----|-----|-----|-------|-------|-------|
| 132306 | Agilent38MB | X:153763492 | missense | T | 1.87E-14 | 24  | 60 | 18 | 48 | 0/0 | 0/0 | 0/0 | match | match | match |
| 163383 | TruSeqV2    | X:153763492 | missense | T | 8.66E-15 | 66  | 99 | 16 | 48 | 0/0 | 0/0 | 0/0 | match | match | match |
| 198564 | Agilent38MB | X:153763492 | missense | T | 2.62E-14 | 43  | 92 | 24 | 66 | 0/0 | 0/0 | 0/0 | match | match | match |
| 108971 | TruSeqV2    | X:153763531 | missense | C | 6.66E-16 | 78  | 99 | 16 | 45 | 0/0 | 0/0 | 0/0 | match | match | match |
| 115239 | TruSeqV2    | X:153763531 | missense | C | 6.66E-16 | 38  | 84 | 6  | 18 | 0/0 | 0/0 | 0/0 | match | match | match |
| 132306 | Agilent38MB | X:153763531 | missense | C | 1.33E-15 | 12  | 30 | 12 | 36 | 0/0 | 0/0 | 0/0 | match | match | match |
| 163383 | TruSeqV2    | X:153763531 | missense | C | 8.88E-16 | 43  | 99 | 13 | 33 | 0/0 | 0/0 | 0/0 | match | match | match |
| 198564 | Agilent38MB | X:153763531 | missense | C | 6.66E-16 | 29  | 69 | 18 | 33 | 0/0 | 0/0 | 0/0 | match | match | match |
| 108971 | TruSeqV2    | X:153764190 | missense | C | 6.66E-16 | 197 | 99 | 18 | 53 | 0/0 | 0/0 | 0/0 | match | match | match |
| 115239 | TruSeqV2    | X:153764190 | missense | C | 2.56E-12 | 132 | 99 | 10 | 30 | 0/0 | 0/0 | 0/0 | match | match | match |
| 132306 | Agilent38MB | X:153764190 | missense | C | 3.33E-15 | 28  | 72 | 9  | 21 | 0/0 | 0/0 | 0/0 | match | match | match |
| 163383 | TruSeqV2    | X:153764190 | missense | C | 6.66E-15 | 161 | 99 | 14 | 33 | 0/0 | 0/0 | 0/0 | match | match | match |
| 198564 | Agilent38MB | X:153764190 | missense | C | 7.55E-15 | 52  | 99 | 14 | 41 | 0/0 | 0/0 | 0/0 | match | match | match |
| 108971 | TruSeqV2    | X:43591031  | stop     | C | 3.95E-14 | 83  | 99 | 26 | 75 | 0/0 | 0/0 | 0/0 | match | match | match |
| 115239 | TruSeqV2    | X:43591031  | stop     | C | 1.55E-15 | 60  | 99 | 25 | 54 | 0/0 | 0/0 | 0/0 | match | match | match |
| 132306 | Agilent38MB | X:43591031  | stop     | C | 8.66E-15 | 88  | 99 | 21 | 57 | 0/0 | 0/0 | 0/0 | match | match | match |
| 163383 | TruSeqV2    | X:43591031  | stop     | C | 2.71E-14 | 69  | 99 | 30 | 78 | 0/0 | 0/0 | 0/0 | match | match | match |
| 198564 | Agilent38MB | X:43591031  | stop     | C | 3.82E-14 | 129 | 99 | 21 | 20 | 0/0 | 0/0 | 0/0 | match | match | match |
| 108971 | TruSeqV2    | X:43591085  | missense | T | 8.88E-16 | 57  | 99 | 30 | 81 | 0/0 | 0/0 | 0/0 | match | match | match |
| 115239 | TruSeqV2    | X:43591085  | missense | T | 8.88E-16 | 39  | 78 | 24 | 63 | 0/0 | 0/0 | 0/0 | match | match | match |
| 132306 | Agilent38MB | X:43591085  | missense | T | 4.49E-14 | 61  | 99 | 17 | 45 | 0/0 | 0/0 | 0/0 | match | match | match |
| 163383 | TruSeqV2    | X:43591085  | missense | T | 2.00E-15 | 46  | 99 | 19 | 48 | 0/0 | 0/0 | 0/0 | match | match | match |
| 198564 | Agilent38MB | X:43591085  | missense | T | 2.22E-16 | 107 | 99 | 20 | 48 | 0/0 | 0/0 | 0/0 | match | match | match |
| 108971 | TruSeqV2    | X:43592016  | synon    | A | 2.22E-16 | 57  | 99 | 16 | 42 | 0/0 | 0/0 | 0/0 | match | match | match |
| 115239 | TruSeqV2    | X:43592016  | synon    | A | 2.22E-16 | 45  | 99 | 20 | 60 | 0/0 | 0/0 | 0/0 | match | match | match |
| 132306 | Agilent38MB | X:43592016  | synon    | A | 2.22E-16 | 157 | 99 | 10 | 30 | 0/0 | 0/0 | 0/0 | match | match | match |
| 163383 | TruSeqV2    | X:43592016  | synon    | A | 4.44E-16 | 50  | 99 | 17 | 51 | 0/0 | 0/0 | 0/0 | match | match | match |
| 198564 | Agilent38MB | X:43592016  | synon    | A | 4.44E-16 | 300 | 99 | 14 | 6  | 0/0 | 0/0 | 0/0 | match | match | match |
| 108971 | TruSeqV2    | X:43599964  | synon    | G | 2.22E-16 | 21  | 60 | 20 | 54 | 0/0 | 0/0 | 0/0 | match | match | match |
| 115239 | TruSeqV2    | X:43599964  | synon    | G | 4.44E-16 | 24  | 66 | 26 | 69 | 0/0 | 0/0 | 0/0 | match | match | match |
| 132306 | Agilent38MB | X:43599964  | synon    | G | 6.66E-16 | 18  | 48 | 8  | 21 | 0/0 | 0/0 | 0/0 | match | match | match |
| 163383 | TruSeqV2    | X:43599964  | synon    | G | 4.44E-16 | 26  | 78 | 20 | 54 | 0/0 | 0/0 | 0/0 | match | match | match |
| 198564 | Agilent38MB | X:43599964  | synon    | G | 2.22E-16 | 23  | 69 | 17 | 51 | 0/0 | 0/0 | 0/0 | match | match | match |
| 108971 | TruSeqV2    | X:43603113  | missense | G | 2.22E-16 | 61  | 99 | 31 | 81 | 0/0 | 0/0 | 0/0 | match | match | match |
| 115239 | TruSeqV2    | X:43603113  | missense | G | 2.89E-15 | 72  | 99 | 15 | 33 | 0/0 | 0/0 | 0/0 | match | match | match |
| 132306 | Agilent38MB | X:43603113  | missense | G | 6.66E-16 | 3   | 6  | 22 | 63 | 0/0 | 0/0 | 0/0 | match | match | match |
| 163383 | TruSeqV2    | X:43603113  | missense | G | 2.22E-16 | 78  | 99 | 28 | 69 | 0/0 | 0/0 | 0/0 | match | match | match |
| 198564 | Agilent38MB | X:43603113  | missense | G | 2.22E-15 | 12  | 21 | 18 | 51 | 0/0 | 0/0 | 0/0 | match | match | match |

|        |             |            |          |   |          |     |    |    |    |     |     |     |       |       |       |
|--------|-------------|------------|----------|---|----------|-----|----|----|----|-----|-----|-----|-------|-------|-------|
| 108971 | TruSeqV2    | X:43603391 | synon    | C | 4.44E-16 | 110 | 99 | 29 | 87 | 1/1 | 1/1 | 1/1 | match | match | match |
| 115239 | TruSeqV2    | X:43603391 | synon    | C | 3.55E-15 | 75  | 99 | 23 | 69 | 1/1 | 1/1 | 1/1 | match | match | match |
| 132306 | Agilent38MB | X:43603391 | synon    | C | 8.88E-16 | 46  | 99 | 15 | 45 | 1/1 | 1/1 | 1/1 | match | match | match |
| 163383 | TruSeqV2    | X:43603391 | synon    | C | 8.88E-16 | 108 | 99 | 25 | 74 | 1/1 | 1/1 | 1/1 | match | match | match |
| 198564 | Agilent38MB | X:43603391 | synon    | C | 1.91E-14 | 127 | 99 | 24 | 72 | 1/1 | 1/1 | 1/1 | match | match | match |
| 108971 | TruSeqV2    | X:43603735 | missense | A | 8.88E-16 | 59  | 99 | 22 | 57 | 0/0 | 0/0 | 0/0 | match | match | match |
| 115239 | TruSeqV2    | X:43603735 | missense | A | 4.44E-16 | 60  | 99 | 31 | 81 | 0/0 | 0/0 | 0/0 | match | match | match |
| 132306 | Agilent38MB | X:43603735 | missense | A | 6.66E-16 | 95  | 99 | 11 | 30 | 0/0 | 0/0 | 0/0 | match | match | match |
| 163383 | TruSeqV2    | X:43603735 | missense | A | 1.11E-15 | 59  | 99 | 20 | 48 | 0/0 | 0/0 | 0/0 | match | match | match |
| 198564 | Agilent38MB | X:43603735 | missense | A | 1.78E-15 | 142 | 99 | 18 | 48 | 0/0 | 0/0 | 0/0 | match | match | match |
| 108971 | TruSeqV2    | X:43626815 | synon    | G | 2.89E-15 | 39  | 83 | 17 | 35 | 0/0 | 0/0 | 0/0 | match | match | match |
| 115239 | TruSeqV2    | X:43626815 | synon    | G | 4.44E-16 | 19  | 42 | 21 | 60 | 0/0 | 0/0 | 0/0 | match | match | match |
| 132306 | Agilent38MB | X:43626815 | synon    | G | 1.11E-15 | 36  | 99 | 14 | 42 | 0/0 | 0/0 | 0/0 | match | match | match |
| 163383 | TruSeqV2    | X:43626815 | synon    | G | 8.88E-16 | 34  | 90 | 15 | 42 | 0/0 | 0/0 | 0/0 | match | match | match |
| 198564 | Agilent38MB | X:43626815 | synon    | G | 1.78E-15 | 77  | 99 | 20 | 51 | 0/0 | 0/0 | 0/0 | match | match | match |
| 108971 | TruSeqV2    | X:43627999 | intronic | T | 6.66E-16 | 48  | 92 | 21 | 57 | 0/0 | 0/0 | 0/0 | match | match | match |
| 115239 | TruSeqV2    | X:43627999 | intronic | C | 1.11E-15 | 35  | 99 | 28 | 84 | 1/1 | 1/1 | 1/1 | match | match | match |
| 132306 | Agilent38MB | X:43627999 | intronic | C | 2.00E-15 | 26  | 78 | 20 | 60 | 1/1 | 1/1 | 1/1 | match | match | match |
| 163383 | TruSeqV2    | X:43627999 | intronic | C | 8.88E-16 | 44  | 99 | 19 | 57 | 1/1 | 1/1 | 1/1 | match | match | match |
| 198564 | Agilent38MB | X:43627999 | intronic | C | 8.88E-16 | 66  | 99 | 19 | 57 | 1/1 | 1/1 | 1/1 | match | match | match |
| 108971 | TruSeqV2    | X:43639615 | synon    | T | 2.00E-15 | 39  | 99 | 18 | 45 | 0/0 | 0/0 | 0/0 | match | match | match |
| 115239 | TruSeqV2    | X:43639615 | synon    | T | 6.66E-16 | 23  | 66 | 19 | 48 | 0/0 | 0/0 | 0/0 | match | match | match |
| 132306 | Agilent38MB | X:43639615 | synon    | T | 3.11E-15 | 59  | 99 | 11 | 33 | 0/0 | 0/0 | 0/0 | match | match | match |
| 163383 | TruSeqV2    | X:43639615 | synon    | T | 5.55E-15 | 34  | 99 | 19 | 57 | 0/0 | 0/0 | 0/0 | match | match | match |
| 198564 | Agilent38MB | X:43639615 | synon    | T | 1.31E-14 | 67  | 99 | 19 | 57 | 0/0 | 0/0 | 0/0 | match | match | match |
| 108971 | TruSeqV2    | X:43656384 | synon    | T | 2.22E-16 | 48  | 99 | 29 | 72 | 0/0 | 0/0 | 0/0 | match | match | match |
| 115239 | TruSeqV2    | X:43656384 | synon    | T | 1.11E-15 | 34  | 96 | 19 | 48 | 0/0 | 0/0 | 0/0 | match | match | match |
| 132306 | Agilent38MB | X:43656384 | synon    | T | 2.22E-16 | 87  | 99 | 26 | 69 | 0/0 | 0/0 | 0/0 | match | match | match |
| 163383 | TruSeqV2    | X:43656384 | synon    | T | 4.44E-16 | 39  | 99 | 29 | 75 | 0/0 | 0/0 | 0/0 | match | match | match |
| 198564 | Agilent38MB | X:43656384 | synon    | T | 4.44E-15 | 216 | 99 | 24 | 63 | 0/0 | 0/0 | 0/0 | match | match | match |
| 108971 | TruSeqV2    | X:43661506 | missense | G | 2.22E-16 | 55  | 99 | 26 | 69 | 0/0 | 0/0 | 0/0 | match | match | match |
| 115239 | TruSeqV2    | X:43661506 | missense | G | 2.22E-16 | 41  | 99 | 23 | 66 | 0/0 | 0/0 | 0/0 | match | match | match |
| 132306 | Agilent38MB | X:43661506 | missense | G | 2.22E-16 | 13  | 30 | 13 | 38 | 0/0 | 0/0 | 0/0 | match | match | match |
| 163383 | TruSeqV2    | X:43661506 | missense | G | 4.44E-16 | 59  | 99 | 19 | 54 | 0/0 | 0/0 | 0/0 | match | match | match |
| 198564 | Agilent38MB | X:43661506 | missense | G | 1.20E-14 | 47  | 99 | 18 | 51 | 0/0 | 0/0 | 0/0 | match | match | match |
| 108971 | TruSeqV2    | X:43702944 | missense | C | 4.44E-16 | 68  | 99 | 7  | 18 | 0/0 | 0/0 | 0/0 | match | match | match |
| 115239 | TruSeqV2    | X:43702944 | missense | C | 2.22E-16 | 51  | 99 | 15 | 39 | 0/0 | 0/0 | 0/0 | match | match | match |
| 132306 | Agilent38MB | X:43702944 | missense | C | 2.22E-16 | 76  | 99 | 17 | 42 | 0/0 | 0/0 | 0/0 | match | match | match |

|        |             |            |          |   |          |     |    |    |    |     |     |     |       |       |       |
|--------|-------------|------------|----------|---|----------|-----|----|----|----|-----|-----|-----|-------|-------|-------|
| 163383 | TruSeqV2    | X:43702944 | missense | C | 2.22E-16 | 55  | 99 | 12 | 35 | 0/0 | 0/0 | 0/0 | match | match | match |
| 198564 | Agilent38MB | X:43702944 | missense | C | 8.88E-16 | 146 | 99 | 9  | 21 | 0/0 | 0/0 | 0/0 | match | match | match |
| 132306 | Agilent38MB | X:46445660 | intronic | G | 2.66E-15 | 2   | 6  | 18 | 51 | 0/0 | 0/0 | 0/0 | match | match | match |
| 108971 | TruSeqV2    | X:46457221 | 3'UTR    | G | 1.11E-15 | 100 | 99 | 24 | 57 | 0/0 | 0/0 | 0/0 | match | match | match |
| 115239 | TruSeqV2    | X:46457221 | 3'UTR    | G | 4.44E-16 | 52  | 99 | 13 | 36 | 0/0 | 0/0 | 0/0 | match | match | match |
| 163383 | TruSeqV2    | X:46457221 | 3'UTR    | G | 4.44E-16 | 81  | 99 | 20 | 54 | 0/0 | 0/0 | 0/0 | match | match | match |
| 108971 | TruSeqV2    | X:46457786 | 3'UTR    | A | 4.44E-16 | 29  | 37 | 28 | 84 | 1/1 | 1/1 | 1/1 | match | match | match |
| 115239 | TruSeqV2    | X:46457786 | 3'UTR    | A | 4.44E-16 | 29  | 87 | 18 | 54 | 1/1 | 1/1 | 1/1 | match | match | match |
| 163383 | TruSeqV2    | X:46457786 | 3'UTR    | A | 8.88E-16 | 20  | 11 | 27 | 81 | 1/1 | 1/1 | 1/1 | match | match | match |
| 198564 | Agilent38MB | X:46458623 | 3'UTR    | T | 1.07E-14 | 1   | 3  | 26 | 78 | 1/1 | 1/1 | 1/1 | match | match | match |
| 108971 | TruSeqV2    | X:74284996 | synon    | T | 4.44E-16 | 31  | 84 | 29 | 81 | 0/0 | 0/0 | 0/0 | match | match | match |
| 115239 | TruSeqV2    | X:74284996 | synon    | T | 3.33E-15 | 28  | 78 | 22 | 0  | 0/0 | 0/0 | 0/0 | match | match | match |
| 132306 | Agilent38MB | X:74284996 | synon    | T | 2.22E-16 | 50  | 99 | 25 | 72 | 0/0 | 0/0 | 0/0 | match | match | match |
| 163383 | TruSeqV2    | X:74284996 | synon    | T | 5.55E-15 | 28  | 78 | 22 | 60 | 0/0 | 0/0 | 0/0 | match | match | match |
| 198564 | Agilent38MB | X:74284996 | synon    | T | 8.66E-15 | 115 | 99 | 29 | 75 | 0/0 | 0/0 | 0/0 | match | match | match |
| 108971 | TruSeqV2    | X:74284997 | missense | G | 2.22E-16 | 33  | 90 | 29 | 84 | 0/0 | 0/0 | 0/0 | match | match | match |
| 115239 | TruSeqV2    | X:74284997 | missense | G | 4.44E-16 | 28  | 78 | 22 | 0  | 0/0 | 0/0 | 0/0 | match | match | match |
| 132306 | Agilent38MB | X:74284997 | missense | G | 2.22E-16 | 50  | 99 | 25 | 72 | 0/0 | 0/0 | 0/0 | match | match | match |
| 163383 | TruSeqV2    | X:74284997 | missense | G | 4.44E-16 | 29  | 81 | 23 | 63 | 0/0 | 0/0 | 0/0 | match | match | match |
| 198564 | Agilent38MB | X:74284997 | missense | G | 4.44E-16 | 113 | 99 | 29 | 68 | 0/0 | 0/0 | 0/0 | match | match | match |
| 108971 | TruSeqV2    | X:74295240 | missense | A | 6.66E-16 | 47  | 99 | 16 | 42 | 0/0 | 0/0 | 0/0 | match | match | match |
| 115239 | TruSeqV2    | X:74295240 | missense | A | 4.44E-16 | 26  | 75 | 34 | 90 | 0/0 | 0/0 | 0/0 | match | match | match |
| 132306 | Agilent38MB | X:74295240 | missense | A | 4.44E-16 | 36  | 96 | 29 | 84 | 0/0 | 0/0 | 0/0 | match | match | match |
| 163383 | TruSeqV2    | X:74295240 | missense | A | 4.44E-16 | 48  | 99 | 27 | 75 | 0/0 | 0/0 | 0/0 | match | match | match |
| 198564 | Agilent38MB | X:74295240 | missense | A | 1.08E-13 | 65  | 99 | 25 | 69 | 0/0 | 0/0 | 0/0 | match | match | match |
| 108971 | TruSeqV2    | X:74295279 | missense | C | 2.22E-16 | 65  | 99 | 12 | 27 | 0/0 | 0/0 | 0/0 | match | match | match |
| 115239 | TruSeqV2    | X:74295279 | missense | C | 6.66E-16 | 35  | 99 | 24 | 63 | 0/0 | 0/0 | 0/0 | match | match | match |
| 132306 | Agilent38MB | X:74295279 | missense | C | 2.22E-16 | 43  | 99 | 24 | 69 | 0/0 | 0/0 | 0/0 | match | match | match |
| 163383 | TruSeqV2    | X:74295279 | missense | C | 2.22E-16 | 64  | 99 | 24 | 60 | 0/0 | 0/0 | 0/0 | match | match | match |
| 198564 | Agilent38MB | X:74295279 | missense | C | 2.22E-16 | 83  | 99 | 17 | 48 | 0/0 | 0/0 | 0/0 | match | match | match |
| 108971 | TruSeqV2    | X:77244041 | missense | C | 4.44E-16 | 152 | 99 | 21 | 54 | 0/0 | 0/0 | 0/0 | match | match | match |
| 115239 | TruSeqV2    | X:77244041 | missense | C | 1.78E-15 | 76  | 99 | 29 | 78 | 0/0 | 0/0 | 0/0 | match | match | match |
| 132306 | Agilent38MB | X:77244041 | missense | C | 1.11E-15 | 93  | 99 | 18 | 51 | 0/0 | 0/0 | 0/0 | match | match | match |
| 163383 | TruSeqV2    | X:77244041 | missense | C | 3.55E-15 | 110 | 99 | 22 | 63 | 0/0 | 0/0 | 0/0 | match | match | match |
| 198564 | Agilent38MB | X:77244041 | missense | C | 6.66E-16 | 139 | 99 | 22 | 54 | 0/0 | 0/0 | 0/0 | match | match | match |
| 108971 | TruSeqV2    | X:77244116 | stop     | C | 4.44E-16 | 164 | 99 | 22 | 60 | 0/0 | 0/0 | 0/0 | match | match | match |
| 115239 | TruSeqV2    | X:77244116 | stop     | C | 2.22E-16 | 94  | 99 | 25 | 63 | 0/0 | 0/0 | 0/0 | match | match | match |
| 132306 | Agilent38MB | X:77244116 | stop     | C | 6.66E-16 | 165 | 99 | 21 | 60 | 0/0 | 0/0 | 0/0 | match | match | match |

|        |             |              |          |     |          |     |    |    |    |     |     |     |       |          |          |
|--------|-------------|--------------|----------|-----|----------|-----|----|----|----|-----|-----|-----|-------|----------|----------|
| 163383 | TruSeqV2    | X:77244116   | stop     | C   | 4.44E-16 | 112 | 99 | 19 | 45 | 0/0 | 0/0 | 0/0 | match | match    | match    |
| 198564 | Agilent38MB | X:77244116   | stop     | C   | 1.11E-15 | 300 | 99 | 23 | 60 | 0/0 | 0/0 | 0/0 | match | match    | match    |
| 108971 | TruSeqV2    | X:77244182   | missense | A   | 4.44E-16 | 108 | 99 | 26 | 63 | 0/0 | 0/0 | 0/0 | match | match    | match    |
| 115239 | TruSeqV2    | X:77244182   | missense | A   | 1.33E-15 | 53  | 99 | 22 | 66 | 0/0 | 0/0 | 0/0 | match | match    | match    |
| 132306 | Agilent38MB | X:77244182   | missense | A   | 2.22E-16 | 254 | 99 | 24 | 69 | 0/0 | 0/0 | 0/0 | match | match    | match    |
| 163383 | TruSeqV2    | X:77244182   | missense | A   | 6.66E-16 | 74  | 99 | 16 | 42 | 0/0 | 0/0 | 0/0 | match | match    | match    |
| 198564 | Agilent38MB | X:77244182   | missense | A   | 2.00E-15 | 480 | 99 | 14 | 39 | 0/0 | 0/0 | 0/0 | match | match    | match    |
| 108971 | TruSeqV2    | X:77245343   | stop     | C   | 2.22E-16 | 71  | 99 | 22 | 63 | 0/0 | 0/0 | 0/0 | match | match    | match    |
| 115239 | TruSeqV2    | X:77245343   | stop     | C   | 2.22E-16 | 35  | 99 | 21 | 51 | 0/0 | 0/0 | 0/0 | match | match    | match    |
| 132306 | Agilent38MB | X:77245343   | stop     | C   | 4.44E-16 | 109 | 99 | 25 | 75 | 0/0 | 0/0 | 0/0 | match | match    | match    |
| 163383 | TruSeqV2    | X:77245343   | stop     | C   | 2.22E-16 | 64  | 99 | 25 | 72 | 0/0 | 0/0 | 0/0 | match | match    | match    |
| 198564 | Agilent38MB | X:77245343   | stop     | C   | 2.22E-16 | 129 | 99 | 18 | 48 | 0/0 | 0/0 | 0/0 | match | match    | match    |
| 108971 | TruSeqV2    | X:77254028   | synon    | T   | 2.22E-16 | 70  | 99 | 21 | 60 | 0/0 | 0/0 | 0/0 | match | match    | match    |
| 115239 | TruSeqV2    | X:77254028   | synon    | T   | 2.22E-16 | 46  | 99 | 22 | 54 | 0/0 | 0/0 | 0/0 | match | match    | match    |
| 132306 | Agilent38MB | X:77254028   | synon    | T   | 6.66E-16 | 171 | 99 | 26 | 66 | 0/0 | 0/0 | 0/0 | match | match    | match    |
| 163383 | TruSeqV2    | X:77254028   | synon    | T   | 2.22E-16 | 71  | 99 | 25 | 69 | 0/0 | 0/0 | 0/0 | match | match    | match    |
| 198564 | Agilent38MB | X:77254028   | synon    | T   | 5.11E-15 | 325 | 99 | 25 | 66 | 0/0 | 0/0 | 0/0 | match | match    | match    |
| 108971 | TruSeqV2    | X:77268502   | missense | G   | 1.33E-15 | 51  | 99 | 24 | 60 | 0/0 | 0/0 | 0/0 | match | match    | match    |
| 115239 | TruSeqV2    | X:77268502   | missense | G   | 6.66E-16 | 32  | 87 | 23 | 0  | 0/0 | 0/0 | 0/0 | match | match    | match    |
| 132306 | Agilent38MB | X:77268502   | missense | G   | 1.11E-15 | 136 | 99 | 17 | 39 | 0/0 | 0/0 | 0/0 | match | match    | match    |
| 163383 | TruSeqV2    | X:77268502   | missense | G   | 9.33E-15 | 36  | 93 | 23 | 60 | 0/0 | 0/0 | 0/0 | match | match    | match    |
| 198564 | Agilent38MB | X:77268502   | missense | G   | 4.66E-15 | 310 | 99 | 22 | 63 | 0/0 | 0/0 | 0/0 | match | match    | match    |
| 108971 | TruSeqV2    | X:77301044   | missense | G   | 4.88E-14 | 67  | 99 | 16 | 48 | 0/0 | 0/0 | 0/0 | match | match    | match    |
| 115239 | TruSeqV2    | X:77301044   | missense | G   | 1.95E-14 | 58  | 99 | 17 | 48 | 0/0 | 0/0 | 0/0 | match | match    | match    |
| 132306 | Agilent38MB | X:77301044   | missense | G   | 5.13E-14 | 139 | 99 | 14 | 39 | 0/0 | 0/0 | 0/0 | match | match    | match    |
| 163383 | TruSeqV2    | X:77301044   | missense | G   | 6.00E-15 | 63  | 99 | 9  | 24 | 0/0 | 0/0 | 0/0 | match | match    | match    |
| 198564 | Agilent38MB | X:77301044   | missense | G   | 6.03E-13 | 242 | 99 | 23 | 63 | 0/0 | 0/0 | 0/0 | match | match    | match    |
| 115239 | TruSeqV2    | 10:101606861 | synon    | G/G | 6.66E-16 | 112 | 99 | 25 | 53 | 0/0 | 0/0 | 0/1 | match | mismatch | mismatch |
| 115239 | TruSeqV2    | 12:21331599  | synon    | C/C | 3.33E-15 | 59  | 99 | 32 | 99 | 1/1 | 1/1 | 0/1 | match | mismatch | mismatch |
| 115239 | TruSeqV2    | 14:23248112  | synon    | G/G | 8.22E-15 | 139 | 99 | 39 | 13 | 1/1 | 1/1 | 0/1 | match | mismatch | mismatch |
| 115239 | TruSeqV2    | 15:45554267  | missense | A/A | 3.33E-15 | 54  | 99 | 36 | 67 | 1/1 | 1/1 | 0/1 | match | mismatch | mismatch |
| 115239 | TruSeqV2    | 16:28617485  | missense | T/T | 4.44E-16 | 40  | 99 | 6  | 26 | 1/1 | 1/1 | 0/1 | match | mismatch | mismatch |
| 115239 | TruSeqV2    | 16:28617514  | missense | T/C | 3.12E-09 | 34  | 99 | 6  | 15 | 0/1 | 0/1 | 0/0 | match | mismatch | mismatch |
| 115239 | TruSeqV2    | 18:9536249   | 3'UTR    | T/T | 1.11E-15 | 105 | 99 | 11 | 3  | 1/1 | 1/1 | 0/1 | match | mismatch | mismatch |
| 115239 | TruSeqV2    | 19:16040292  | synon    | G/G | 3.89E-14 | 79  | 99 | 24 | 52 | 1/1 | 1/1 | 0/1 | match | mismatch | mismatch |
| 115239 | TruSeqV2    | 2:108993719  | promoter | G/G | 2.22E-16 | 1   | 3  | 34 | 99 | 0/0 | 0/0 | 0/1 | match | mismatch | mismatch |
| 115239 | TruSeqV2    | 2:27424636   | missense | A/A | 2.22E-10 | 210 | 99 | 20 | 72 | 1/1 | 1/1 | 0/1 | match | mismatch | mismatch |
| 115239 | TruSeqV2    | 2:38298203   | missense | G/G | 1.22E-14 | 159 | 99 | 40 | 8  | 1/1 | 1/1 | 0/1 | match | mismatch | mismatch |



|        |             |              |            |     |          |     |    |    |    |     |     |     |          |               |               |
|--------|-------------|--------------|------------|-----|----------|-----|----|----|----|-----|-----|-----|----------|---------------|---------------|
| 115239 | TruSeqV2    | 22:42525912  | splice     | C/C | 2.22E-16 | 6   | 12 | 0  | 0  | 0/0 | 0/0 | NC  | match    | missing<br>GT | missing<br>GT |
| 132306 | Agilent38MB | 22:42525912  | splice     | C/C | 8.88E-16 | 4   | 6  | 0  | 0  | 0/0 | 0/0 | NC  | match    | missing<br>GT | missing<br>GT |
| 163383 | TruSeqV2    | 22:42525912  | splice     | C/C | 6.66E-16 | 5   | 6  | 0  | 0  | 0/0 | 0/0 | NC  | match    | missing<br>GT | missing<br>GT |
| 132306 | Agilent38MB | 3:126261345  | missense   | A/G | 5.11E-15 | 20  | 99 | 0  | 0  | 0/1 | 0/1 | NC  | match    | missing<br>GT | missing<br>GT |
| 108971 | TruSeqV2    | 5:131705676  | stop       | C/C | 7.08E-10 | 30  | 90 | 0  | 0  | 0/0 | 0/0 | NC  | match    | missing<br>GT | missing<br>GT |
| 132306 | Agilent38MB | 5:131705676  | stop       | C/C | 2.86E-13 | 41  | 99 | 0  | 0  | 0/0 | 0/0 | NC  | match    | missing<br>GT | missing<br>GT |
| 163383 | TruSeqV2    | 5:131705676  | stop       | C/C | 6.14E-13 | 16  | 48 | 0  | 0  | 0/0 | 0/0 | NC  | match    | missing<br>GT | missing<br>GT |
| 115239 | TruSeqV2    | 6:32008469   | missense   | G/G | 3.88E-08 | 323 | 99 | 0  | 0  | 0/0 | 0/0 | NC  | match    | missing<br>GT | missing<br>GT |
| 115239 | TruSeqV2    | 6:32008648   | missense   | C/C | 4.52E-09 | 89  | 99 | 0  | 0  | 0/0 | 0/0 | NC  | match    | missing<br>GT | missing<br>GT |
| 115239 | TruSeqV2    | 6:32008696   | missense   | G/G | 1.04E-14 | 35  | 87 | 0  | 0  | 0/0 | 0/0 | NC  | match    | missing<br>GT | missing<br>GT |
| 108971 | TruSeqV2    | 7:17338425   | 5'UTR      | G/G | 4.53E-09 | 8   | 21 | 0  | 0  | 0/0 | 0/0 | NC  | match    | missing<br>GT | missing<br>GT |
| 163383 | TruSeqV2    | 7:17338425   | 5'UTR      | G/G | 2.66E-15 | 7   | 21 | 0  | 0  | 0/0 | 0/0 | NC  | match    | missing<br>GT | missing<br>GT |
| 132306 | Agilent38MB | 1:161212569  | intergenic | G/A | 1.78E-15 | 2   | 6  | 29 | 99 | 0/1 | 0/0 | 0/1 | mismatch | match         | mismatch      |
| 163383 | TruSeqV2    | 1:161212569  | intergenic | G/A | 1.11E-15 | 2   | 6  | 38 | 99 | 0/1 | 1/1 | 0/1 | mismatch | match         | mismatch      |
| 198564 | Agilent38MB | 1:171121268  | synon      | A/G | 1.18E-12 | 26  | 1  | 36 | 99 | 0/1 | 0/0 | 0/1 | mismatch | match         | mismatch      |
| 108971 | TruSeqV2    | 1:171179477  | 3'UTR      | C/T | 8.88E-16 | 3   | 9  | 43 | 99 | 0/1 | 1/1 | 0/1 | mismatch | match         | mismatch      |
| 132306 | Agilent38MB | 1:171179477  | 3'UTR      | C/T | 6.66E-16 | 2   | 6  | 47 | 99 | 0/1 | 0/0 | 0/1 | mismatch | match         | mismatch      |
| 132306 | Agilent38MB | 1:171254794  | 3'UTR      | C/T | 2.38E-14 | 4   | 0  | 37 | 99 | 0/1 | 0/0 | 0/1 | mismatch | match         | mismatch      |
| 132306 | Agilent38MB | 10:135340567 | promoter   | A/T | 9.17E-14 | 2   | 6  | 49 | 99 | 0/1 | 0/0 | 0/1 | mismatch | match         | mismatch      |
| 198564 | Agilent38MB | 10:135340829 | promoter   | G/T | 6.44E-15 | 6   | 0  | 48 | 99 | 0/1 | 0/0 | 0/1 | mismatch | match         | mismatch      |
| 198564 | Agilent38MB | 10:73769543  | 3'UTR      | A/G | 6.66E-16 | 1   | 3  | 45 | 99 | 0/1 | 0/0 | 0/1 | mismatch | match         | mismatch      |
| 198564 | Agilent38MB | 10:73772762  | 3'UTR      | C/T | 5.40E-14 | 2   | 6  | 23 | 99 | 0/1 | 1/1 | 0/1 | mismatch | match         | mismatch      |
| 163383 | TruSeqV2    | 10:82035173  | intronic   | T/C | 2.00E-15 | 3   | 0  | 53 | 99 | 0/1 | 0/0 | 0/1 | mismatch | match         | mismatch      |
| 132306 | Agilent38MB | 10:94839724  | 3'UTR      | G/T | 1.35E-14 | 4   | 0  | 28 | 99 | 0/1 | 0/0 | 0/1 | mismatch | match         | mismatch      |
| 198564 | Agilent38MB | 11:45679197  | intronic   | G/A | 3.11E-15 | 3   | 9  | 41 | 99 | 0/1 | 0/0 | 0/1 | mismatch | match         | mismatch      |
| 198564 | Agilent38MB | 11:64333296  | intronic   | A/G | 4.88E-14 | 1   | 3  | 42 | 99 | 0/1 | 0/0 | 0/1 | mismatch | match         | mismatch      |

|        |             |              |            |     |          |   |    |    |    |     |     |     |          |       |          |
|--------|-------------|--------------|------------|-----|----------|---|----|----|----|-----|-----|-----|----------|-------|----------|
| 198564 | Agilent38MB | 11:64334114  | intronic   | C/T | 2.86E-14 | 1 | 3  | 30 | 99 | 0/1 | 0/0 | 0/1 | mismatch | match | mismatch |
| 132306 | Agilent38MB | 12:105152997 | 3'UTR      | C/T | 1.55E-15 | 2 | 6  | 24 | 99 | 0/1 | 1/1 | 0/1 | mismatch | match | mismatch |
| 132306 | Agilent38MB | 12:105153570 | 3'UTR      | C/T | 4.44E-15 | 2 | 6  | 21 | 99 | 0/1 | 0/0 | 0/1 | mismatch | match | mismatch |
| 198564 | Agilent38MB | 12:21476983  | intronic   | G/A | 6.66E-15 | 1 | 3  | 41 | 99 | 0/1 | 0/0 | 0/1 | mismatch | match | mismatch |
| 132306 | Agilent38MB | 15:75041917  | promoter   | A/C | 4.44E-16 | 2 | 6  | 42 | 99 | 0/1 | 0/0 | 0/1 | mismatch | match | mismatch |
| 198564 | Agilent38MB | 15:75041917  | promoter   | A/C | 2.89E-15 | 4 | 0  | 35 | 99 | 0/1 | 0/0 | 0/1 | mismatch | match | mismatch |
| 198564 | Agilent38MB | 15:92698643  | intronic   | C/G | 4.88E-15 | 2 | 6  | 45 | 99 | 0/1 | 1/1 | 0/1 | mismatch | match | mismatch |
| 132306 | Agilent38MB | 16:16236004  | 3'UTR      | A/T | 7.33E-15 | 2 | 6  | 24 | 99 | 0/1 | 1/1 | 0/1 | mismatch | match | mismatch |
| 198564 | Agilent38MB | 16:29666736  | intronic   | G/A | 1.78E-14 | 1 | 3  | 40 | 99 | 0/1 | 0/0 | 0/1 | mismatch | match | mismatch |
| 132306 | Agilent38MB | 16:31102321  | 3'UTR      | T/C | 5.94E-11 | 4 | 0  | 23 | 99 | 0/1 | 0/0 | 0/1 | mismatch | match | mismatch |
| 108971 | TruSeqV2    | 16:31104509  | intronic   | G/C | 1.33E-15 | 2 | 6  | 19 | 99 | 0/1 | 1/1 | 0/1 | mismatch | match | mismatch |
| 108971 | TruSeqV2    | 16:31104878  | intronic   | G/A | 2.44E-15 | 8 | 0  | 18 | 99 | 0/1 | 0/0 | 0/1 | mismatch | match | mismatch |
| 115239 | TruSeqV2    | 16:31104878  | intronic   | G/A | 1.22E-14 | 3 | 9  | 13 | 99 | 0/1 | 1/1 | 0/1 | mismatch | match | mismatch |
| 132306 | Agilent38MB | 16:31104878  | intronic   | G/A | 6.22E-15 | 2 | 6  | 15 | 99 | 0/1 | 1/1 | 0/1 | mismatch | match | mismatch |
| 115239 | TruSeqV2    | 16:31105554  | intronic   | C/A | 5.31E-14 | 1 | 3  | 6  | 52 | 0/1 | 0/0 | 0/1 | mismatch | match | mismatch |
| 115239 | TruSeqV2    | 16:69745145  | missense   | G/A | 2.00E-15 | 2 | 6  | 44 | 99 | 0/1 | 1/1 | 0/1 | mismatch | match | mismatch |
| 132306 | Agilent38MB | 16:71560153  | 5'UTR      | C/T | 2.13E-14 | 2 | 6  | 40 | 99 | 0/1 | 1/1 | 0/1 | mismatch | match | mismatch |
| 132306 | Agilent38MB | 17:37828496  | 3'UTR      | T/C | 2.60E-14 | 2 | 6  | 30 | 99 | 0/1 | 1/1 | 0/1 | mismatch | match | mismatch |
| 198564 | Agilent38MB | 17:37828496  | 3'UTR      | T/C | 4.95E-14 | 3 | 0  | 33 | 99 | 0/1 | 0/0 | 0/1 | mismatch | match | mismatch |
| 198564 | Agilent38MB | 19:15740220  | 3'UTR      | C/T | 6.66E-16 | 6 | 0  | 34 | 99 | 0/1 | 0/0 | 0/1 | mismatch | match | mismatch |
| 108971 | TruSeqV2    | 19:41515483  | intronic   | A/G | 6.57E-12 | 4 | 0  | 27 | 99 | 0/1 | 0/0 | 0/1 | mismatch | match | mismatch |
| 198564 | Agilent38MB | 2:138771760  | 3'UTR      | A/G | 8.22E-15 | 4 | 0  | 54 | 99 | 0/1 | 0/0 | 0/1 | mismatch | match | mismatch |
| 198564 | Agilent38MB | 2:138772694  | 3'UTR      | C/T | 2.89E-15 | 2 | 6  | 51 | 99 | 0/1 | 0/0 | 0/1 | mismatch | match | mismatch |
| 198564 | Agilent38MB | 2:169779896  | 3'UTR      | T/C | 5.29E-13 | 1 | 3  | 36 | 99 | 0/1 | 0/0 | 0/1 | mismatch | match | mismatch |
| 132306 | Agilent38MB | 2:169789016  | synon      | T/C | 4.15E-11 | 3 | 9  | 19 | 99 | 0/1 | 1/1 | 0/1 | mismatch | match | mismatch |
| 198564 | Agilent38MB | 2:201540533  | intergenic | A/G | 2.00E-15 | 1 | 3  | 56 | 99 | 0/1 | 0/0 | 0/1 | mismatch | match | mismatch |
| 198564 | Agilent38MB | 2:201541827  | intergenic | A/G | 1.69E-14 | 2 | 0  | 45 | 99 | 0/1 | 0/0 | 0/1 | mismatch | match | mismatch |
| 198564 | Agilent38MB | 2:201542014  | intergenic | G/T | 1.78E-15 | 6 | 0  | 39 | 99 | 0/1 | 0/0 | 0/1 | mismatch | match | mismatch |
| 132306 | Agilent38MB | 2:234665659  | promoter   | G/T | 4.44E-16 | 1 | 3  | 19 | 99 | 0/1 | 0/0 | 0/1 | mismatch | match | mismatch |
| 132306 | Agilent38MB | 20:61289743  | intronic   | C/T | 7.44E-14 | 1 | 3  | 21 | 99 | 0/1 | 0/0 | 0/1 | mismatch | match | mismatch |
| 198564 | Agilent38MB | 20:61303742  | 3'UTR      | C/T | 1.55E-15 | 1 | 3  | 36 | 99 | 0/1 | 0/0 | 0/1 | mismatch | match | mismatch |
| 115239 | TruSeqV2    | 21:37445739  | 3'UTR      | C/G | 2.00E-15 | 1 | 3  | 43 | 99 | 0/1 | 0/0 | 0/1 | mismatch | match | mismatch |
| 198564 | Agilent38MB | 21:37445739  | 3'UTR      | C/G | 4.00E-15 | 1 | 3  | 53 | 99 | 0/1 | 0/0 | 0/1 | mismatch | match | mismatch |
| 198564 | Agilent38MB | 21:43701977  | intronic   | A/G | 2.22E-15 | 4 | 12 | 25 | 99 | 0/1 | 0/0 | 0/1 | mismatch | match | mismatch |
| 132306 | Agilent38MB | 21:43706776  | intronic   | A/G | 1.22E-14 | 2 | 6  | 36 | 99 | 0/1 | 1/1 | 0/1 | mismatch | match | mismatch |
| 198564 | Agilent38MB | 21:43706776  | intronic   | A/G | 1.38E-14 | 4 | 0  | 34 | 99 | 0/1 | 0/0 | 0/1 | mismatch | match | mismatch |
| 132306 | Agilent38MB | 21:43707101  | intronic   | C/G | 1.20E-13 | 1 | 3  | 25 | 99 | 0/1 | 0/0 | 0/1 | mismatch | match | mismatch |
| 115239 | TruSeqV2    | 21:43710909  | intronic   | C/G | 1.33E-14 | 1 | 3  | 33 | 99 | 0/1 | 0/0 | 0/1 | mismatch | match | mismatch |

|        |             |             |            |         |             |     |    |    |    |     |     |     |          |          |          |
|--------|-------------|-------------|------------|---------|-------------|-----|----|----|----|-----|-----|-----|----------|----------|----------|
| 132306 | Agilent38MB | 21:43716022 | intronic   | A/G     | 1.33E-15    | 3   | 0  | 32 | 99 | 0/1 | 0/0 | 0/1 | mismatch | match    | mismatch |
| 132306 | Agilent38MB | 21:43718483 | 3'UTR      | A/G     | 8.88E-16    | 3   | 0  | 34 | 99 | 0/1 | 0/0 | 0/1 | mismatch | match    | mismatch |
| 198564 | Agilent38MB | 22:24302486 | synon      | G/G     | 2.18E-14    | 1   | 3  | 2  | 6  | 1/1 | 0/0 | 1/1 | mismatch | match    | mismatch |
| 132306 | Agilent38MB | 22:42525132 | synon      | G/C     | 1.42E-14    | 1   | 3  | 33 | 99 | 0/1 | 0/0 | 0/1 | mismatch | match    | mismatch |
| 108971 | TruSeqV2    | 3:12477055  | 3'UTR      | C/G     | 1.11E-15    | 1   | 3  | 39 | 99 | 0/1 | 0/0 | 0/1 | mismatch | match    | mismatch |
| 198564 | Agilent38MB | 3:12478817  | 3'UTR      | A/G     | 1.55E-15    | 1   | 3  | 30 | 99 | 0/1 | 0/0 | 0/1 | mismatch | match    | mismatch |
| 132306 | Agilent38MB | 3:126257872 | intronic   | C/G     | 0.000107383 | 3   | 0  | 32 | 99 | 0/1 | 0/0 | 0/1 | mismatch | match    | mismatch |
| 198564 | Agilent38MB | 3:142836966 | intergenic | A/G     | 1.33E-15    | 1   | 3  | 31 | 99 | 0/1 | 0/0 | 0/1 | mismatch | match    | mismatch |
| 132306 | Agilent38MB | 3:14474225  | intronic   | C/T     | 1.11E-15    | 2   | 6  | 34 | 99 | 0/1 | 0/0 | 0/1 | mismatch | match    | mismatch |
| 198564 | Agilent38MB | 3:183637845 | 3'UTR      | T/C     | 2.00E-14    | 1   | 3  | 43 | 99 | 0/1 | 0/0 | 0/1 | mismatch | match    | mismatch |
| 198564 | Agilent38MB | 3:38363837  | intergenic | A/C     | 6.66E-16    | 3   | 6  | 50 | 99 | 0/1 | 0/0 | 0/1 | mismatch | match    | mismatch |
| 115239 | TruSeqV2    | 3:38365841  | intergenic | C/T     | 1.02E-14    | 1   | 3  | 57 | 99 | 0/1 | 0/0 | 0/1 | mismatch | match    | mismatch |
| 198564 | Agilent38MB | 4:69961912  | promoter   | A/G     | 3.35E-12    | 2   | 6  | 48 | 99 | 0/1 | 0/0 | 0/1 | mismatch | match    | mismatch |
| 132306 | Agilent38MB | 4:70346127  | 3'UTR      | G/A     | 8.88E-16    | 2   | 6  | 42 | 99 | 0/1 | 0/0 | 0/1 | mismatch | match    | mismatch |
| 163383 | TruSeqV2    | 4:70725456  | intronic   | G/C     | 3.33E-15    | 1   | 3  | 44 | 99 | 0/1 | 0/0 | 0/1 | mismatch | match    | mismatch |
| 198564 | Agilent38MB | 6:52669185  | promoter   | C/A     | 4.44E-15    | 2   | 6  | 49 | 99 | 0/1 | 0/0 | 0/1 | mismatch | match    | mismatch |
| 198564 | Agilent38MB | 7:122838633 | intronic   | T/G     | 1.33E-15    | 2   | 6  | 47 | 99 | 0/1 | 1/1 | 0/1 | mismatch | match    | mismatch |
| 108971 | TruSeqV2    | 8:143954290 | 3'UTR      | G/A     | 6.66E-16    | 1   | 3  | 32 | 99 | 0/1 | 0/0 | 0/1 | mismatch | match    | mismatch |
| 163383 | TruSeqV2    | 8:143954290 | 3'UTR      | G/A     | 8.88E-16    | 1   | 3  | 36 | 99 | 0/1 | 0/0 | 0/1 | mismatch | match    | mismatch |
| 132306 | Agilent38MB | 8:143954747 | 3'UTR      | T/C     | 8.88E-16    | 1   | 3  | 37 | 99 | 0/1 | 0/0 | 0/1 | mismatch | match    | mismatch |
| 132306 | Agilent38MB | 8:143955657 | 3'UTR      | G/A     | 4.11E-14    | 4   | 0  | 26 | 99 | 0/1 | 0/0 | 0/1 | mismatch | match    | mismatch |
| 115239 | TruSeqV2    | 8:18079213  | intronic   | C/T     | 1.53E-14    | 3   | 0  | 45 | 99 | 0/1 | 0/0 | 0/1 | mismatch | match    | mismatch |
| 115239 | TruSeqV2    | 8:59403576  | 3'UTR      | T/C     | 2.09E-14    | 4   | 0  | 42 | 99 | 0/1 | 0/0 | 0/1 | mismatch | match    | mismatch |
| 115239 | TruSeqV2    | 8:59412924  | promoter   | T/G     | 2.22E-15    | 1   | 3  | 54 | 99 | 0/1 | 0/0 | 0/1 | mismatch | match    | mismatch |
| 108971 | TruSeqV2    | 1:110230839 | synon      | C/C     | 2.00E-15    | 69  | 99 | 17 | 39 | 1/1 | 0/0 | 0/0 | mismatch | mismatch | match    |
| 115239 | TruSeqV2    | 1:110230839 | synon      | C/C     | 6.09E-09    | 89  | 99 | 13 | 36 | 1/1 | 0/0 | 0/0 | mismatch | mismatch | match    |
| 132306 | Agilent38MB | 1:110230839 | synon      | C/C     | 3.33E-15    | 46  | 99 | 12 | 33 | 1/1 | 0/0 | 0/0 | mismatch | mismatch | match    |
| 115239 | TruSeqV2    | 1:110280254 | intronic   | AGG/AGG | 2.80E-14    | 104 | 99 | 51 | 99 | 0/0 | 0/1 | 0/1 | mismatch | mismatch | match    |
| 163383 | TruSeqV2    | 1:110280254 | intronic   | AGG/AGG | 1.75E-14    | 104 | 99 | 51 | 99 | 0/0 | 0/1 | 0/1 | mismatch | mismatch | match    |
| 198564 | Agilent38MB | 1:110280254 | intronic   | AGG/AGG | 1.91E-14    | 104 | 99 | 51 | 99 | 0/0 | 0/1 | 0/1 | mismatch | mismatch | match    |
| 108971 | TruSeqV2    | 10:96698494 | missense   | A/A     | 2.90E-05    | 180 | 99 | 50 | 99 | 1/1 | 0/0 | 0/0 | mismatch | mismatch | match    |
| 132306 | Agilent38MB | 10:96698494 | missense   | A/A     | 1.03E-09    | 46  | 99 | 45 | 99 | 1/1 | 0/0 | 0/0 | mismatch | mismatch | match    |
| 115239 | TruSeqV2    | 15:92459646 | missense   | AT/AT   | 0.000125744 | 61  | 99 | 7  | 12 | 1/1 | 0/0 | 0/0 | mismatch | mismatch | match    |
| 132306 | Agilent38MB | 15:92459646 | missense   | AT/AT   | 9.13E-07    | 22  | 57 | 17 | 45 | 1/1 | 0/0 | 0/0 | mismatch | mismatch | match    |
| 163383 | TruSeqV2    | 15:92459646 | missense   | AT/AT   | 6.82E-06    | 68  | 99 | 23 | 54 | 1/1 | 0/0 | 0/0 | mismatch | mismatch | match    |
| 198564 | Agilent38MB | 15:92459646 | missense   | AT/AT   | 3.47E-05    | 47  | 99 | 15 | 36 | 1/1 | 0/0 | 0/0 | mismatch | mismatch | match    |
| 132306 | Agilent38MB | 16:28603655 | missense   | T/G     | 6.45E-09    | 286 | 99 | 43 | 99 | 0/1 | 1/1 | 1/1 | mismatch | mismatch | match    |
| 163383 | TruSeqV2    | 16:28603655 | missense   | T/G     | 1.54E-10    | 79  | 99 | 42 | 99 | 0/1 | 1/1 | 1/1 | mismatch | mismatch | match    |



|        |             |             |          |                         |             |     |    |    |    |     |     |     |          |          |       |
|--------|-------------|-------------|----------|-------------------------|-------------|-----|----|----|----|-----|-----|-----|----------|----------|-------|
| 108971 | TruSeqV2    | 16:28607196 | missense | G/G                     | 8.88E-16    | 277 | 99 | 32 | 99 | 0/0 | 0/1 | 0/1 | mismatch | mismatch | match |
| 108971 | TruSeqV2    | 16:28607232 | missense | G/G                     | 1.33E-15    | 228 | 99 | 29 | 99 | 1/1 | 0/1 | 0/1 | mismatch | mismatch | match |
| 132306 | Agilent38MB | 16:28620067 | missense | NoCall                  | 1           | 199 | 99 | 46 | 99 | 1/1 | 0/0 | 0/0 | mismatch | mismatch | match |
| 163383 | TruSeqV2    | 16:28620067 | missense | NoCall                  | 1           | 360 | 99 | 32 | 93 | 1/1 | 0/0 | 0/0 | mismatch | mismatch | match |
| 108971 | TruSeqV2    | 19:15760053 | synon    | G/G                     | 6.21E-06    | 191 | 99 | 33 | 99 | 0/0 | 0/1 | 0/1 | mismatch | mismatch | match |
| 163383 | TruSeqV2    | 19:15760053 | synon    | G/G                     | 2.03E-11    | 128 | 99 | 29 | 99 | 0/0 | 0/1 | 0/1 | mismatch | mismatch | match |
| 108971 | TruSeqV2    | 2:101009326 | 3'UTR    | T/T                     | 1.89E-14    | 165 | 99 | 30 | 99 | 0/0 | 0/1 | 0/1 | mismatch | mismatch | match |
| 132306 | Agilent38MB | 2:234580463 | promoter | -/T                     | 1.73E-07    | 14  | 36 | 39 | 99 | 0/1 | 0/0 | 0/0 | mismatch | mismatch | match |
| 163383 | TruSeqV2    | 2:234580463 | promoter | -/T                     | 1.08E-09    | 14  | 36 | 39 | 99 | 0/1 | 0/0 | 0/0 | mismatch | mismatch | match |
| 198564 | Agilent38MB | 2:234580463 | promoter | -/T                     | 2.18E-11    | 14  | 36 | 39 | 99 | 0/1 | 0/0 | 0/0 | mismatch | mismatch | match |
| 115239 | TruSeqV2    | 2:234668881 | promoter | (TA)5or6/(T<br>A)7or8   | 1.12E-05    | 47  | 61 | 39 | 48 | 0/1 | 0/0 | 0/0 | mismatch | mismatch | match |
| 132306 | Agilent38MB | 2:234668881 | promoter | (TA)5or6/(T<br>A)7or8   | 1.25E-09    | 47  | 61 | 39 | 48 | 0/1 | 0/0 | 0/0 | mismatch | mismatch | match |
| 132306 | Agilent38MB | 2:38298139  | missense | T/C                     | 0.000260054 | 77  | 99 | 43 | 99 | 0/1 | 1/1 | 1/1 | mismatch | mismatch | match |
| 115239 | TruSeqV2    | 22:42522660 | missense | Possible<br>rare allele | 1           | 252 | 99 | 41 | 99 | 1/1 | 0/0 | 0/0 | mismatch | mismatch | match |
| 115239 | TruSeqV2    | 22:42524244 | fs       | -/A                     | 7.33E-15    | 135 | 99 | 34 | 93 | 0/1 | 0/0 | 0/0 | mismatch | mismatch | match |
| 198564 | Agilent38MB | 22:42524244 | fs       | -/A                     | 7.55E-15    | 135 | 99 | 34 | 93 | 0/1 | 0/0 | 0/0 | mismatch | mismatch | match |
| 198564 | Agilent38MB | 4:69417570  | synon    | G/A                     | 1.84E-14    | 278 | 99 | 14 | 42 | 0/1 | 0/0 | 0/0 | mismatch | mismatch | match |
| 108971 | TruSeqV2    | 4:69512655  | 3'UTR    | A/A                     | 3.11E-15    | 85  | 99 | 50 | 68 | 1/1 | 0/0 | 0/0 | mismatch | mismatch | match |
| 115239 | TruSeqV2    | 4:69512655  | 3'UTR    | G/A                     | 2.89E-15    | 47  | 99 | 47 | 99 | 1/1 | 0/0 | 0/0 | mismatch | mismatch | match |
| 163383 | TruSeqV2    | 4:69512655  | 3'UTR    | G/A                     | 5.55E-15    | 82  | 99 | 50 | 0  | 1/1 | 0/0 | 0/0 | mismatch | mismatch | match |
| 198564 | Agilent38MB | 4:69512655  | 3'UTR    | G/A                     | 1.55E-15    | 3   | 9  | 51 | 99 | 1/1 | 0/0 | 0/0 | mismatch | mismatch | match |
| 108971 | TruSeqV2    | 4:69512692  | 3'UTR    | G/G                     | 1.11E-15    | 108 | 99 | 45 | 99 | 1/1 | 0/0 | 0/0 | mismatch | mismatch | match |
| 115239 | TruSeqV2    | 4:69512692  | 3'UTR    | G/G                     | 5.33E-15    | 71  | 99 | 49 | 99 | 1/1 | 0/0 | 0/0 | mismatch | mismatch | match |
| 132306 | Agilent38MB | 4:69512692  | 3'UTR    | G/G                     | 2.22E-16    | 4   | 12 | 52 | 99 | 1/1 | 0/0 | 0/0 | mismatch | mismatch | match |
| 163383 | TruSeqV2    | 4:69512692  | 3'UTR    | G/G                     | 2.44E-15    | 112 | 99 | 44 | 99 | 1/1 | 0/0 | 0/0 | mismatch | mismatch | match |
| 198564 | Agilent38MB | 4:69512692  | 3'UTR    | G/G                     | 1.87E-13    | 3   | 6  | 63 | 99 | 1/1 | 0/0 | 0/0 | mismatch | mismatch | match |
| 108971 | TruSeqV2    | 4:69972952  | synon    | C/C                     | 1.18E-08    | 83  | 99 | 37 | 99 | 0/0 | 0/1 | 0/1 | mismatch | mismatch | match |
| 108971 | TruSeqV2    | 4:70160299  | synon    | G/G                     | 6.66E-16    | 96  | 99 | 30 | 87 | 1/1 | 0/0 | 0/0 | mismatch | mismatch | match |
| 115239 | TruSeqV2    | 4:70160299  | synon    | G/G                     | 2.22E-16    | 149 | 99 | 34 | 93 | 1/1 | 0/0 | 0/0 | mismatch | mismatch | match |
| 132306 | Agilent38MB | 4:70160299  | synon    | G/G                     | 4.44E-16    | 43  | 99 | 21 | 57 | 1/1 | 0/0 | 0/0 | mismatch | mismatch | match |
| 163383 | TruSeqV2    | 4:70160299  | synon    | G/G                     | 1.44E-10    | 128 | 99 | 40 | 99 | 1/1 | 0/0 | 0/0 | mismatch | mismatch | match |
| 198564 | Agilent38MB | 4:70160299  | synon    | G/G                     | 2.22E-16    | 122 | 99 | 52 | 99 | 1/1 | 0/0 | 0/0 | mismatch | mismatch | match |
| 108971 | TruSeqV2    | 4:70160309  | missense | G/G                     | 2.22E-16    | 109 | 99 | 31 | 87 | 1/1 | 0/0 | 0/0 | mismatch | mismatch | match |
| 115239 | TruSeqV2    | 4:70160309  | missense | G/G                     | 8.88E-16    | 158 | 99 | 35 | 99 | 1/1 | 0/1 | 0/1 | mismatch | mismatch | match |
| 132306 | Agilent38MB | 4:70160309  | missense | G/G                     | 4.44E-16    | 43  | 99 | 20 | 48 | 1/1 | 0/0 | 0/0 | mismatch | mismatch | match |

|        |             |             |          |             |          |     |    |    |    |     |     |     |          |          |          |
|--------|-------------|-------------|----------|-------------|----------|-----|----|----|----|-----|-----|-----|----------|----------|----------|
| 163383 | TruSeqV2    | 4:70160309  | missense | G/G         | 1.29E-13 | 155 | 99 | 37 | 99 | 1/1 | 0/0 | 0/0 | mismatch | mismatch | match    |
| 198564 | Agilent38MB | 4:70160309  | missense | G/G         | 4.44E-16 | 124 | 99 | 45 | 99 | 1/1 | 0/1 | 0/1 | mismatch | mismatch | match    |
|        |             |             |          | Possible    |          |     |    |    |    |     |     |     |          |          |          |
| 108971 | TruSeqV2    | 6:160553314 | missense | rare allele | 1.62E-12 | 208 | 99 | 38 | 99 | 1/1 | 0/1 | 0/1 | mismatch | mismatch | match    |
| 115239 | TruSeqV2    | 6:160560883 | missense | -/GAT       | 3.55E-15 | 71  | 99 | 36 | 81 | 0/1 | 0/0 | 0/0 | mismatch | mismatch | match    |
| 108971 | TruSeqV2    | 8:18079906  | missense | GG/GG       | 2.22E-16 | 424 | 99 | 34 | 87 | 1/1 | 0/0 | 0/0 | mismatch | mismatch | match    |
| 115239 | TruSeqV2    | 8:18079906  | missense | GG/GG       | 2.22E-16 | 261 | 99 | 45 | 99 | 1/1 | 0/0 | 0/0 | mismatch | mismatch | match    |
| 132306 | Agilent38MB | 8:18079906  | missense | GG/GG       | 2.22E-16 | 71  | 99 | 33 | 81 | 1/1 | 0/0 | 0/0 | mismatch | mismatch | match    |
| 163383 | TruSeqV2    | 8:18079906  | missense | GG/GG       | 2.22E-16 | 311 | 99 | 48 | 99 | 1/1 | 0/0 | 0/0 | mismatch | mismatch | match    |
| 198564 | Agilent38MB | 8:18079906  | missense | GG/GG       | 4.44E-16 | 126 | 99 | 54 | 99 | 1/1 | 0/0 | 0/0 | mismatch | mismatch | match    |
| 108971 | TruSeqV2    | 8:18080053  | missense | GGG/GGG     | 4.44E-16 | 144 | 99 | 54 | 99 | 1/1 | 0/0 | 0/0 | mismatch | mismatch | match    |
| 115239 | TruSeqV2    | 8:18080053  | missense | GGG/GGG     | 2.22E-15 | 103 | 99 | 40 | 99 | 1/1 | 0/0 | 0/0 | mismatch | mismatch | match    |
| 132306 | Agilent38MB | 8:18080053  | missense | GGG/GGG     | 4.44E-16 | 90  | 99 | 36 | 99 | 1/1 | 0/0 | 0/0 | mismatch | mismatch | match    |
| 163383 | TruSeqV2    | 8:18080053  | missense | GGG/GGG     | 6.66E-16 | 133 | 99 | 50 | 99 | 1/1 | 0/0 | 0/0 | mismatch | mismatch | match    |
| 198564 | Agilent38MB | 8:18080053  | missense | GGG/GGG     | 1.11E-15 | 160 | 99 | 55 | 99 | 1/1 | 0/0 | 0/0 | mismatch | mismatch | match    |
| 115239 | TruSeqV2    | 16:28607232 | missense | G/G         | 6.66E-16 | 163 | 99 | 6  | 18 | 1/1 | 0/1 | 0/0 | mismatch | mismatch | mismatch |
| 198564 | Agilent38MB | 16:28607232 | missense | G/G         | 8.88E-16 | 135 | 99 | 25 | 99 | 1/1 | 0/0 | 0/1 | mismatch | mismatch | mismatch |
| 115239 | TruSeqV2    | 19:41384675 | missense | C/C         | 6.66E-16 | 108 | 99 | 14 | 0  | 1/1 | 0/1 | 0/0 | mismatch | mismatch | mismatch |
| 108971 | TruSeqV2    | 3:126261345 | missense | A/G         | 1.08E-12 | 1   | 3  | 7  | 21 | 0/1 | 0/0 | 1/1 | mismatch | mismatch | mismatch |
|        |             |             |          |             |          |     |    |    |    |     |     |     | missing  |          | missing  |
| 108971 | TruSeqV2    | 1:110254411 | promoter | C/T         | 2.00E-14 | 0   | 0  | 39 | 99 | 0/1 | NC  | 0/1 | GT       | match    | GT       |
|        |             |             |          |             |          |     |    |    |    |     |     |     | missing  |          | missing  |
| 115239 | TruSeqV2    | 1:110254411 | promoter | C/T         | 6.32E-13 | 0   | 0  | 24 | 64 | 0/1 | NC  | 0/1 | GT       | match    | GT       |
|        |             |             |          |             |          |     |    |    |    |     |     |     | missing  |          | missing  |
| 163383 | TruSeqV2    | 1:110254411 | promoter | C/C         | 7.99E-15 | 0   | 0  | 23 | 54 | 0/0 | NC  | 0/0 | GT       | match    | GT       |
|        |             |             |          |             |          |     |    |    |    |     |     |     | missing  |          | missing  |
| 198564 | Agilent38MB | 1:110254411 | promoter | C/T         | 1.28E-08 | 0   | 0  | 18 | 99 | 0/1 | NC  | 0/1 | GT       | match    | GT       |
|        |             |             |          |             |          |     |    |    |    |     |     |     | missing  |          | missing  |
| 132306 | Agilent38MB | 1:110260510 | 3'UTR    | G/G         | 2.22E-16 | 0   | 0  | 33 | 93 | 0/0 | NC  | 0/0 | GT       | match    | GT       |
|        |             |             |          |             |          |     |    |    |    |     |     |     | missing  |          | missing  |
| 198564 | Agilent38MB | 1:110260510 | 3'UTR    | G/G         | 2.22E-16 | 0   | 0  | 45 | 99 | 0/0 | NC  | 0/0 | GT       | match    | GT       |
|        |             |             |          |             |          |     |    |    |    |     |     |     | missing  |          | missing  |
| 132306 | Agilent38MB | 1:110260742 | 3'UTR    | C/T         | 5.22E-14 | 0   | 0  | 27 | 99 | 0/1 | NC  | 0/1 | GT       | match    | GT       |
|        |             |             |          |             |          |     |    |    |    |     |     |     | missing  |          | missing  |
| 108971 | TruSeqV2    | 1:110283069 | 5'UTR    | C/C         | 3.48E-11 | 0   | 0  | 22 | 57 | 0/0 | NC  | 0/0 | GT       | match    | GT       |
|        |             |             |          |             |          |     |    |    |    |     |     |     | missing  |          | missing  |
| 163383 | TruSeqV2    | 1:110283069 | 5'UTR    | C/C         | 9.79E-14 | 0   | 0  | 19 | 51 | 0/0 | NC  | 0/0 | GT       | match    | GT       |

|        |             |             |            |     |          |   |   |    |    |     |    |     |               |       |               |
|--------|-------------|-------------|------------|-----|----------|---|---|----|----|-----|----|-----|---------------|-------|---------------|
| 108971 | TruSeqV2    | 1:113452284 | intergenic | G/G | 4.44E-16 | 0 | 0 | 50 | 99 | 0/0 | NC | 0/0 | missing<br>GT | match | missing<br>GT |
| 115239 | TruSeqV2    | 1:113452284 | intergenic | G/G | 4.44E-16 | 0 | 0 | 51 | 99 | 0/0 | NC | 0/0 | missing<br>GT | match | missing<br>GT |
| 132306 | Agilent38MB | 1:113452284 | intergenic | T/G | 7.11E-15 | 0 | 0 | 45 | 99 | 0/1 | NC | 0/1 | missing<br>GT | match | missing<br>GT |
| 163383 | TruSeqV2    | 1:113452284 | intergenic | T/G | 5.11E-15 | 0 | 0 | 57 | 99 | 0/1 | NC | 0/1 | missing<br>GT | match | missing<br>GT |
| 198564 | Agilent38MB | 1:113452284 | intergenic | G/G | 3.33E-15 | 0 | 0 | 51 | 99 | 0/0 | NC | 0/0 | missing<br>GT | match | missing<br>GT |
| 132306 | Agilent38MB | 1:113454571 | 3'UTR      | A/A | 1.11E-15 | 0 | 0 | 37 | 84 | 0/0 | NC | 0/0 | missing<br>GT | match | missing<br>GT |
| 198564 | Agilent38MB | 1:113454571 | 3'UTR      | A/A | 4.88E-15 | 0 | 0 | 59 | 99 | 0/0 | NC | 0/0 | missing<br>GT | match | missing<br>GT |
| 132306 | Agilent38MB | 1:113454637 | 3'UTR      | C/C | 6.66E-16 | 0 | 0 | 34 | 84 | 0/0 | NC | 0/0 | missing<br>GT | match | missing<br>GT |
| 132306 | Agilent38MB | 1:113455099 | 3'UTR      | G/G | 6.44E-15 | 0 | 0 | 39 | 99 | 0/0 | NC | 0/0 | missing<br>GT | match | missing<br>GT |
| 198564 | Agilent38MB | 1:113455099 | 3'UTR      | A/A | 1.09E-14 | 0 | 0 | 52 | 99 | 1/1 | NC | 1/1 | missing<br>GT | match | missing<br>GT |
| 108971 | TruSeqV2    | 1:113458216 | intronic   | G/G | 4.44E-16 | 0 | 0 | 49 | 99 | 0/0 | NC | 0/0 | missing<br>GT | match | missing<br>GT |
| 115239 | TruSeqV2    | 1:113458216 | intronic   | G/G | 1.33E-15 | 0 | 0 | 49 | 99 | 0/0 | NC | 0/0 | missing<br>GT | match | missing<br>GT |
| 163383 | TruSeqV2    | 1:113458216 | intronic   | G/G | 4.44E-16 | 0 | 0 | 51 | 99 | 0/0 | NC | 0/0 | missing<br>GT | match | missing<br>GT |
| 198564 | Agilent38MB | 1:113458216 | intronic   | G/G | 1.11E-15 | 0 | 0 | 46 | 99 | 0/0 | NC | 0/0 | missing<br>GT | match | missing<br>GT |
| 132306 | Agilent38MB | 1:150849103 | 5'UTR      | C/C | 2.22E-16 | 0 | 0 | 22 | 57 | 0/0 | NC | 0/0 | missing<br>GT | match | missing<br>GT |
| 108971 | TruSeqV2    | 1:161212063 | intronic   | C/C | 4.44E-16 | 0 | 0 | 28 | 78 | 0/0 | NC | 0/0 | missing<br>GT | match | missing<br>GT |
| 115239 | TruSeqV2    | 1:161212063 | intronic   | C/C | 2.22E-16 | 0 | 0 | 50 | 99 | 0/0 | NC | 0/0 | missing<br>GT | match | missing<br>GT |
| 132306 | Agilent38MB | 1:161212063 | intronic   | C/C | 2.22E-16 | 0 | 0 | 41 | 99 | 0/0 | NC | 0/0 | missing<br>GT | match | missing<br>GT |
| 163383 | TruSeqV2    | 1:161212063 | intronic   | C/C | 4.44E-16 | 0 | 0 | 39 | 99 | 0/0 | NC | 0/0 | missing<br>GT | match | missing<br>GT |

|        |             |             |            |     |          |   |   |    |    |     |    |     |               |       |               |
|--------|-------------|-------------|------------|-----|----------|---|---|----|----|-----|----|-----|---------------|-------|---------------|
| 198564 | Agilent38MB | 1:161212063 | intronic   | C/C | 6.66E-15 | 0 | 0 | 48 | 99 | 0/0 | NC | 0/0 | missing<br>GT | match | missing<br>GT |
| 108971 | TruSeqV2    | 1:161212453 | intergenic | C/C | 6.66E-16 | 0 | 0 | 41 | 99 | 0/0 | NC | 0/0 | missing<br>GT | match | missing<br>GT |
| 115239 | TruSeqV2    | 1:161212453 | intergenic | T/C | 1.11E-15 | 0 | 0 | 41 | 99 | 0/1 | NC | 0/1 | missing<br>GT | match | missing<br>GT |
| 132306 | Agilent38MB | 1:161212453 | intergenic | C/C | 4.44E-16 | 0 | 0 | 41 | 99 | 0/0 | NC | 0/0 | missing<br>GT | match | missing<br>GT |
| 198564 | Agilent38MB | 1:161212453 | intergenic | C/C | 1.11E-15 | 0 | 0 | 45 | 99 | 0/0 | NC | 0/0 | missing<br>GT | match | missing<br>GT |
| 108971 | TruSeqV2    | 1:161212569 | intergenic | G/G | 8.88E-16 | 0 | 0 | 57 | 99 | 0/0 | NC | 0/0 | missing<br>GT | match | missing<br>GT |
| 115239 | TruSeqV2    | 1:161212569 | intergenic | G/G | 8.88E-16 | 0 | 0 | 55 | 99 | 0/0 | NC | 0/0 | missing<br>GT | match | missing<br>GT |
| 108971 | TruSeqV2    | 1:161212743 | intergenic | C/C | 4.44E-16 | 0 | 0 | 24 | 66 | 0/0 | NC | 0/0 | missing<br>GT | match | missing<br>GT |
| 115239 | TruSeqV2    | 1:161212743 | intergenic | T/C | 1.33E-15 | 0 | 0 | 34 | 99 | 0/1 | NC | 0/1 | missing<br>GT | match | missing<br>GT |
| 163383 | TruSeqV2    | 1:161212743 | intergenic | C/C | 4.44E-16 | 0 | 0 | 36 | 99 | 0/0 | NC | 0/0 | missing<br>GT | match | missing<br>GT |
| 108971 | TruSeqV2    | 1:161212956 | intergenic | A/A | 2.22E-16 | 0 | 0 | 55 | 99 | 0/0 | NC | 0/0 | missing<br>GT | match | missing<br>GT |
| 115239 | TruSeqV2    | 1:161212956 | intergenic | A/A | 4.44E-16 | 0 | 0 | 38 | 99 | 0/0 | NC | 0/0 | missing<br>GT | match | missing<br>GT |
| 163383 | TruSeqV2    | 1:161212956 | intergenic | A/A | 4.44E-16 | 0 | 0 | 41 | 99 | 0/0 | NC | 0/0 | missing<br>GT | match | missing<br>GT |
| 198564 | Agilent38MB | 1:161212956 | intergenic | A/A | 4.66E-15 | 0 | 0 | 45 | 99 | 0/0 | NC | 0/0 | missing<br>GT | match | missing<br>GT |
| 108971 | TruSeqV2    | 1:161213063 | intergenic | G/G | 5.01E-12 | 0 | 0 | 41 | 99 | 0/0 | NC | 0/0 | missing<br>GT | match | missing<br>GT |
| 115239 | TruSeqV2    | 1:161213063 | intergenic | G/G | 1.55E-06 | 0 | 0 | 38 | 96 | 0/0 | NC | 0/0 | missing<br>GT | match | missing<br>GT |
| 132306 | Agilent38MB | 1:161213063 | intergenic | G/G | 1.47E-07 | 0 | 0 | 36 | 99 | 0/0 | NC | 0/0 | missing<br>GT | match | missing<br>GT |
| 163383 | TruSeqV2    | 1:161213063 | intergenic | G/G | 1.31E-07 | 0 | 0 | 27 | 69 | 0/0 | NC | 0/0 | missing<br>GT | match | missing<br>GT |
| 198564 | Agilent38MB | 1:161213063 | intergenic | G/G | 2.66E-14 | 0 | 0 | 38 | 68 | 0/0 | NC | 0/0 | missing<br>GT | match | missing<br>GT |

|        |             |             |          |     |            |   |   |    |    |     |    |     |               |       |               |
|--------|-------------|-------------|----------|-----|------------|---|---|----|----|-----|----|-----|---------------|-------|---------------|
| 108971 | TruSeqV2    | 1:171112490 | intronic | C/C | 1.29E-14   | 0 | 0 | 49 | 99 | 0/0 | NC | 0/0 | missing<br>GT | match | missing<br>GT |
| 115239 | TruSeqV2    | 1:171112490 | intronic | C/T | 1.49E-14   | 0 | 0 | 52 | 99 | 0/1 | NC | 0/1 | missing<br>GT | match | missing<br>GT |
| 132306 | Agilent38MB | 1:171112490 | intronic | C/T | 7.77E-15   | 0 | 0 | 38 | 99 | 0/1 | NC | 0/1 | missing<br>GT | match | missing<br>GT |
| 163383 | TruSeqV2    | 1:171112490 | intronic | C/T | 1.98E-14   | 0 | 0 | 48 | 99 | 0/1 | NC | 0/1 | missing<br>GT | match | missing<br>GT |
| 198564 | Agilent38MB | 1:171112490 | intronic | C/T | 1.41E-13   | 0 | 0 | 44 | 99 | 0/1 | NC | 0/1 | missing<br>GT | match | missing<br>GT |
| 198564 | Agilent38MB | 1:171118840 | missense | A/G | 6.65E-10   | 0 | 0 | 50 | 99 | 0/1 | NC | 0/1 | missing<br>GT | match | missing<br>GT |
| 132306 | Agilent38MB | 1:171179025 | 3'UTR    | T/T | 3.04E-14   | 0 | 0 | 37 | 96 | 0/0 | NC | 0/0 | missing<br>GT | match | missing<br>GT |
| 198564 | Agilent38MB | 1:171179025 | 3'UTR    | T/T | 9.33E-15   | 0 | 0 | 40 | 96 | 0/0 | NC | 0/0 | missing<br>GT | match | missing<br>GT |
| 108971 | TruSeqV2    | 1:171179287 | 3'UTR    | C/T | 8.88E-16   | 0 | 0 | 50 | 99 | 0/1 | NC | 0/1 | missing<br>GT | match | missing<br>GT |
| 115239 | TruSeqV2    | 1:171179287 | 3'UTR    | T/T | 7.11E-15   | 0 | 0 | 50 | 30 | 1/1 | NC | 1/1 | missing<br>GT | match | missing<br>GT |
| 132306 | Agilent38MB | 1:171179287 | 3'UTR    | C/T | 6.66E-16   | 0 | 0 | 44 | 99 | 0/1 | NC | 0/1 | missing<br>GT | match | missing<br>GT |
| 163383 | TruSeqV2    | 1:171179287 | 3'UTR    | C/C | 1.11E-15   | 0 | 0 | 49 | 99 | 0/0 | NC | 0/0 | missing<br>GT | match | missing<br>GT |
| 198564 | Agilent38MB | 1:171179287 | 3'UTR    | C/C | 2.66E-15   | 0 | 0 | 47 | 99 | 0/0 | NC | 0/0 | missing<br>GT | match | missing<br>GT |
| 115239 | TruSeqV2    | 1:171179477 | 3'UTR    | T/T | 2.89E-15   | 0 | 0 | 47 | 10 | 1/1 | NC | 1/1 | missing<br>GT | match | missing<br>GT |
| 198564 | Agilent38MB | 1:171179477 | 3'UTR    | C/C | 2.00E-15   | 0 | 0 | 36 | 96 | 0/0 | NC | 0/0 | missing<br>GT | match | missing<br>GT |
| 132306 | Agilent38MB | 1:171254890 | 3'UTR    | C/T | 1.09E-14   | 0 | 0 | 36 | 99 | 0/1 | NC | 0/1 | missing<br>GT | match | missing<br>GT |
| 108971 | TruSeqV2    | 1:171307155 | intronic | C/C | 0.0009746  | 0 | 0 | 38 | 99 | 0/0 | NC | 0/0 | missing<br>GT | match | missing<br>GT |
| 115239 | TruSeqV2    | 1:171307155 | intronic | C/C | 0.00027026 | 0 | 0 | 26 | 72 | 0/0 | NC | 0/0 | missing<br>GT | match | missing<br>GT |
| 163383 | TruSeqV2    | 1:171307155 | intronic | C/T | 0.00028126 | 0 | 0 | 26 | 99 | 0/1 | NC | 0/1 | missing<br>GT | match | missing<br>GT |

|        |             |             |          |     |          |   |   |    |    |     |    |     |               |       |               |
|--------|-------------|-------------|----------|-----|----------|---|---|----|----|-----|----|-----|---------------|-------|---------------|
| 198564 | Agilent38MB | 1:171307155 | intronic | C/C | 2.77E-05 | 0 | 0 | 35 | 87 | 0/0 | NC | 0/0 | missing<br>GT | match | missing<br>GT |
| 108971 | TruSeqV2    | 1:20916791  | intronic | A/G | 1.11E-15 | 0 | 0 | 49 | 99 | 0/1 | NC | 0/1 | missing<br>GT | match | missing<br>GT |
| 115239 | TruSeqV2    | 1:20916791  | intronic | G/G | 3.77E-15 | 0 | 0 | 30 | 46 | 1/1 | NC | 1/1 | missing<br>GT | match | missing<br>GT |
| 132306 | Agilent38MB | 1:20916791  | intronic | G/G | 8.88E-16 | 0 | 0 | 29 | 87 | 1/1 | NC | 1/1 | missing<br>GT | match | missing<br>GT |
| 163383 | TruSeqV2    | 1:20916791  | intronic | A/G | 2.22E-16 | 0 | 0 | 44 | 99 | 0/1 | NC | 0/1 | missing<br>GT | match | missing<br>GT |
| 198564 | Agilent38MB | 1:20916791  | intronic | A/G | 2.22E-16 | 0 | 0 | 42 | 99 | 0/1 | NC | 0/1 | missing<br>GT | match | missing<br>GT |
| 108971 | TruSeqV2    | 1:20918912  | intronic | T/T | 4.44E-16 | 0 | 0 | 48 | 99 | 0/0 | NC | 0/0 | missing<br>GT | match | missing<br>GT |
| 115239 | TruSeqV2    | 1:20918912  | intronic | C/T | 3.66E-14 | 0 | 0 | 41 | 99 | 0/1 | NC | 0/1 | missing<br>GT | match | missing<br>GT |
| 132306 | Agilent38MB | 1:20918912  | intronic | T/T | 6.66E-16 | 0 | 0 | 42 | 96 | 0/0 | NC | 0/0 | missing<br>GT | match | missing<br>GT |
| 163383 | TruSeqV2    | 1:20918912  | intronic | T/T | 1.78E-15 | 0 | 0 | 46 | 99 | 0/0 | NC | 0/0 | missing<br>GT | match | missing<br>GT |
| 198564 | Agilent38MB | 1:20918912  | intronic | C/T | 5.77E-15 | 0 | 0 | 48 | 99 | 0/1 | NC | 0/1 | missing<br>GT | match | missing<br>GT |
| 108971 | TruSeqV2    | 1:47392054  | 3'UTR    | T/C | 4.22E-15 | 0 | 0 | 56 | 99 | 0/1 | NC | 0/1 | missing<br>GT | match | missing<br>GT |
| 115239 | TruSeqV2    | 1:47392054  | 3'UTR    | T/C | 2.44E-15 | 0 | 0 | 57 | 99 | 0/1 | NC | 0/1 | missing<br>GT | match | missing<br>GT |
| 132306 | Agilent38MB | 1:47392054  | 3'UTR    | T/C | 1.11E-15 | 0 | 0 | 53 | 99 | 0/1 | NC | 0/1 | missing<br>GT | match | missing<br>GT |
| 163383 | TruSeqV2    | 1:47392054  | 3'UTR    | T/T | 4.44E-16 | 0 | 0 | 41 | 99 | 1/1 | NC | 1/1 | missing<br>GT | match | missing<br>GT |
| 198564 | Agilent38MB | 1:47392054  | 3'UTR    | T/T | 2.04E-14 | 0 | 0 | 51 | 99 | 1/1 | NC | 1/1 | missing<br>GT | match | missing<br>GT |
| 108971 | TruSeqV2    | 1:47560735  | intronic | T/T | 7.98E-12 | 0 | 0 | 46 | 99 | 0/0 | NC | 0/0 | missing<br>GT | match | missing<br>GT |
| 115239 | TruSeqV2    | 1:47560735  | intronic | T/T | 2.76E-13 | 0 | 0 | 41 | 96 | 0/0 | NC | 0/0 | missing<br>GT | match | missing<br>GT |
| 132306 | Agilent38MB | 1:47560735  | intronic | T/T | 1.17E-10 | 0 | 0 | 28 | 66 | 0/0 | NC | 0/0 | missing<br>GT | match | missing<br>GT |

|        |             |              |          |     |            |   |   |    |    |     |    |     |               |       |               |
|--------|-------------|--------------|----------|-----|------------|---|---|----|----|-----|----|-----|---------------|-------|---------------|
| 163383 | TruSeqV2    | 1:47560735   | intronic | T/T | 1.63E-12   | 0 | 0 | 50 | 99 | 0/0 | NC | 0/0 | missing<br>GT | match | missing<br>GT |
| 198564 | Agilent38MB | 1:47560735   | intronic | T/T | 2.82E-13   | 0 | 0 | 50 | 99 | 0/0 | NC | 0/0 | missing<br>GT | match | missing<br>GT |
| 108971 | TruSeqV2    | 1:47578471   | intronic | A/A | 6.57E-14   | 0 | 0 | 39 | 99 | 0/0 | NC | 0/0 | missing<br>GT | match | missing<br>GT |
| 115239 | TruSeqV2    | 1:47578471   | intronic | A/C | 0.00016125 | 0 | 0 | 34 | 99 | 0/1 | NC | 0/1 | missing<br>GT | match | missing<br>GT |
| 132306 | Agilent38MB | 1:47578471   | intronic | A/A | 1.18E-14   | 0 | 0 | 29 | 72 | 0/0 | NC | 0/0 | missing<br>GT | match | missing<br>GT |
| 163383 | TruSeqV2    | 1:47578471   | intronic | A/C | 0.00020767 | 0 | 0 | 36 | 99 | 0/1 | NC | 0/1 | missing<br>GT | match | missing<br>GT |
| 198564 | Agilent38MB | 1:47578471   | intronic | A/A | 3.46E-07   | 0 | 0 | 47 | 99 | 0/0 | NC | 0/0 | missing<br>GT | match | missing<br>GT |
| 108971 | TruSeqV2    | 1:47584789   | 3'UTR    | T/T | 2.22E-16   | 0 | 0 | 42 | 99 | 0/0 | NC | 0/0 | missing<br>GT | match | missing<br>GT |
| 115239 | TruSeqV2    | 1:47584789   | 3'UTR    | T/T | 2.22E-16   | 0 | 0 | 39 | 99 | 0/0 | NC | 0/0 | missing<br>GT | match | missing<br>GT |
| 132306 | Agilent38MB | 1:47584789   | 3'UTR    | T/T | 2.22E-16   | 0 | 0 | 26 | 69 | 0/0 | NC | 0/0 | missing<br>GT | match | missing<br>GT |
| 163383 | TruSeqV2    | 1:47584789   | 3'UTR    | T/T | 2.22E-16   | 0 | 0 | 34 | 93 | 0/0 | NC | 0/0 | missing<br>GT | match | missing<br>GT |
| 198564 | Agilent38MB | 1:47584789   | 3'UTR    | T/T | 4.44E-16   | 0 | 0 | 41 | 99 | 0/0 | NC | 0/0 | missing<br>GT | match | missing<br>GT |
| 163383 | TruSeqV2    | 1:60392494   | promoter | C/C | 2.66E-13   | 0 | 0 | 22 | 60 | 0/0 | NC | 0/0 | missing<br>GT | match | missing<br>GT |
| 108971 | TruSeqV2    | 10:135339605 | promoter | G/G | 6.66E-16   | 0 | 0 | 60 | 99 | 0/0 | NC | 0/0 | missing<br>GT | match | missing<br>GT |
| 115239 | TruSeqV2    | 10:135339605 | promoter | G/G | 4.44E-16   | 0 | 0 | 27 | 63 | 0/0 | NC | 0/0 | missing<br>GT | match | missing<br>GT |
| 132306 | Agilent38MB | 10:135339605 | promoter | G/G | 1.78E-15   | 0 | 0 | 45 | 99 | 0/0 | NC | 0/0 | missing<br>GT | match | missing<br>GT |
| 163383 | TruSeqV2    | 10:135339605 | promoter | G/G | 4.44E-16   | 0 | 0 | 52 | 99 | 0/0 | NC | 0/0 | missing<br>GT | match | missing<br>GT |
| 198564 | Agilent38MB | 10:135339605 | promoter | G/G | 1.49E-14   | 0 | 0 | 48 | 99 | 0/0 | NC | 0/0 | missing<br>GT | match | missing<br>GT |
| 108971 | TruSeqV2    | 10:135339845 | promoter | C/C | 2.22E-15   | 0 | 0 | 84 | 99 | 0/0 | NC | 0/0 | missing<br>GT | match | missing<br>GT |

|        |             |              |          |     |          |   |   |    |    |     |    |     |               |       |               |
|--------|-------------|--------------|----------|-----|----------|---|---|----|----|-----|----|-----|---------------|-------|---------------|
| 115239 | TruSeqV2    | 10:135339845 | promoter | C/C | 4.30E-12 | 0 | 0 | 51 | 99 | 0/0 | NC | 0/0 | missing<br>GT | match | missing<br>GT |
| 132306 | Agilent38MB | 10:135339845 | promoter | C/C | 3.33E-15 | 0 | 0 | 59 | 99 | 0/0 | NC | 0/0 | missing<br>GT | match | missing<br>GT |
| 163383 | TruSeqV2    | 10:135339845 | promoter | C/C | 8.79E-12 | 0 | 0 | 51 | 99 | 0/0 | NC | 0/0 | missing<br>GT | match | missing<br>GT |
| 198564 | Agilent38MB | 10:135339845 | promoter | C/C | 2.30E-09 | 0 | 0 | 40 | 99 | 0/0 | NC | 0/0 | missing<br>GT | match | missing<br>GT |
| 108971 | TruSeqV2    | 10:135340548 | promoter | A/A | 6.66E-16 | 0 | 0 | 55 | 99 | 0/0 | NC | 0/0 | missing<br>GT | match | missing<br>GT |
| 115239 | TruSeqV2    | 10:135340548 | promoter | A/A | 1.78E-15 | 0 | 0 | 29 | 75 | 0/0 | NC | 0/0 | missing<br>GT | match | missing<br>GT |
| 163383 | TruSeqV2    | 10:135340548 | promoter | A/A | 1.11E-15 | 0 | 0 | 38 | 90 | 0/0 | NC | 0/0 | missing<br>GT | match | missing<br>GT |
| 108971 | TruSeqV2    | 10:135340567 | promoter | A/T | 7.20E-12 | 0 | 0 | 55 | 99 | 0/1 | NC | 0/1 | missing<br>GT | match | missing<br>GT |
| 115239 | TruSeqV2    | 10:135340567 | promoter | A/T | 2.00E-15 | 0 | 0 | 26 | 99 | 0/1 | NC | 0/1 | missing<br>GT | match | missing<br>GT |
| 163383 | TruSeqV2    | 10:135340567 | promoter | T/T | 8.88E-16 | 0 | 0 | 25 | 74 | 1/1 | NC | 1/1 | missing<br>GT | match | missing<br>GT |
| 132306 | Agilent38MB | 10:73769359  | 3'UTR    | C/C | 1.22E-14 | 0 | 0 | 22 | 40 | 0/0 | NC | 0/0 | missing<br>GT | match | missing<br>GT |
| 198564 | Agilent38MB | 10:73769359  | 3'UTR    | C/C | 1.78E-14 | 0 | 0 | 26 | 69 | 0/0 | NC | 0/0 | missing<br>GT | match | missing<br>GT |
| 132306 | Agilent38MB | 10:73769507  | 3'UTR    | C/T | 3.77E-15 | 0 | 0 | 33 | 99 | 0/1 | NC | 0/1 | missing<br>GT | match | missing<br>GT |
| 198564 | Agilent38MB | 10:73769507  | 3'UTR    | C/T | 1.55E-14 | 0 | 0 | 42 | 99 | 0/1 | NC | 0/1 | missing<br>GT | match | missing<br>GT |
| 132306 | Agilent38MB | 10:73769543  | 3'UTR    | G/G | 2.15E-14 | 0 | 0 | 41 | 99 | 0/0 | NC | 0/0 | missing<br>GT | match | missing<br>GT |
| 132306 | Agilent38MB | 10:73769590  | 3'UTR    | C/T | 1.33E-15 | 0 | 0 | 25 | 99 | 0/1 | NC | 0/1 | missing<br>GT | match | missing<br>GT |
| 198564 | Agilent38MB | 10:73769590  | 3'UTR    | C/T | 1.33E-15 | 0 | 0 | 42 | 99 | 0/1 | NC | 0/1 | missing<br>GT | match | missing<br>GT |
| 132306 | Agilent38MB | 10:73770073  | 3'UTR    | C/T | 1.11E-15 | 0 | 0 | 36 | 99 | 0/1 | NC | 0/1 | missing<br>GT | match | missing<br>GT |
| 198564 | Agilent38MB | 10:73770073  | 3'UTR    | T/T | 1.78E-15 | 0 | 0 | 37 | 99 | 1/1 | NC | 1/1 | missing<br>GT | match | missing<br>GT |



|        |             |             |          |     |          |   |   |    |    |     |    |     |               |       |               |
|--------|-------------|-------------|----------|-----|----------|---|---|----|----|-----|----|-----|---------------|-------|---------------|
| 132306 | Agilent38MB | 10:73770355 | 3'UTR    | A/A | 1.33E-15 | 0 | 0 | 30 | 75 | 0/0 | NC | 0/0 | missing<br>GT | match | missing<br>GT |
| 198564 | Agilent38MB | 10:73770355 | 3'UTR    | A/A | 2.40E-14 | 0 | 0 | 48 | 99 | 0/0 | NC | 0/0 | missing<br>GT | match | missing<br>GT |
| 132306 | Agilent38MB | 10:73770651 | 3'UTR    | C/T | 2.00E-15 | 0 | 0 | 23 | 99 | 0/1 | NC | 0/1 | missing<br>GT | match | missing<br>GT |
| 198564 | Agilent38MB | 10:73770651 | 3'UTR    | C/C | 3.04E-14 | 0 | 0 | 34 | 99 | 1/1 | NC | 1/1 | missing<br>GT | match | missing<br>GT |
| 132306 | Agilent38MB | 10:73771706 | 3'UTR    | A/G | 1.33E-15 | 0 | 0 | 26 | 99 | 0/1 | NC | 0/1 | missing<br>GT | match | missing<br>GT |
| 198564 | Agilent38MB | 10:73771706 | 3'UTR    | A/G | 8.44E-15 | 0 | 0 | 46 | 99 | 0/1 | NC | 0/1 | missing<br>GT | match | missing<br>GT |
| 132306 | Agilent38MB | 10:73771784 | 3'UTR    | G/G | 4.44E-16 | 0 | 0 | 42 | 99 | 0/0 | NC | 0/0 | missing<br>GT | match | missing<br>GT |
| 198564 | Agilent38MB | 10:73771784 | 3'UTR    | G/G | 9.77E-15 | 0 | 0 | 52 | 99 | 0/0 | NC | 0/0 | missing<br>GT | match | missing<br>GT |
| 132306 | Agilent38MB | 10:73772014 | 3'UTR    | A/G | 8.88E-16 | 0 | 0 | 26 | 99 | 0/1 | NC | 0/1 | missing<br>GT | match | missing<br>GT |
| 198564 | Agilent38MB | 10:73772014 | 3'UTR    | A/G | 1.11E-15 | 0 | 0 | 39 | 99 | 0/1 | NC | 0/1 | missing<br>GT | match | missing<br>GT |
| 132306 | Agilent38MB | 10:73772336 | 3'UTR    | C/T | 1.11E-15 | 0 | 0 | 25 | 99 | 0/1 | NC | 0/1 | missing<br>GT | match | missing<br>GT |
| 198564 | Agilent38MB | 10:73772336 | 3'UTR    | C/T | 1.92E-12 | 0 | 0 | 36 | 99 | 0/1 | NC | 0/1 | missing<br>GT | match | missing<br>GT |
| 132306 | Agilent38MB | 10:73772762 | 3'UTR    | C/T | 1.55E-15 | 0 | 0 | 36 | 99 | 0/1 | NC | 0/1 | missing<br>GT | match | missing<br>GT |
| 198564 | Agilent38MB | 10:82035150 | intronic | T/T | 6.66E-16 | 0 | 0 | 36 | 99 | 1/1 | NC | 1/1 | missing<br>GT | match | missing<br>GT |
| 108971 | TruSeqV2    | 10:82035560 | intronic | C/C | 4.44E-16 | 0 | 0 | 43 | 99 | 0/0 | NC | 0/0 | missing<br>GT | match | missing<br>GT |
| 115239 | TruSeqV2    | 10:82035560 | intronic | C/C | 4.44E-16 | 0 | 0 | 26 | 66 | 0/0 | NC | 0/0 | missing<br>GT | match | missing<br>GT |
| 163383 | TruSeqV2    | 10:82035560 | intronic | C/C | 4.44E-16 | 0 | 0 | 54 | 99 | 0/0 | NC | 0/0 | missing<br>GT | match | missing<br>GT |
| 108971 | TruSeqV2    | 10:94839724 | 3'UTR    | T/T | 1.33E-15 | 0 | 0 | 34 | 99 | 1/1 | NC | 1/1 | missing<br>GT | match | missing<br>GT |
| 115239 | TruSeqV2    | 10:94839724 | 3'UTR    | T/T | 1.11E-15 | 0 | 0 | 28 | 84 | 1/1 | NC | 1/1 | missing<br>GT | match | missing<br>GT |

|        |             |             |          |     |          |   |   |    |    |     |    |     |               |       |               |
|--------|-------------|-------------|----------|-----|----------|---|---|----|----|-----|----|-----|---------------|-------|---------------|
| 163383 | TruSeqV2    | 10:94839724 | 3'UTR    | G/T | 2.22E-15 | 0 | 0 | 26 | 99 | 0/1 | NC | 0/1 | missing<br>GT | match | missing<br>GT |
| 108971 | TruSeqV2    | 10:94841107 | 3'UTR    | G/G | 1.55E-15 | 0 | 0 | 37 | 99 | 1/1 | NC | 1/1 | missing<br>GT | match | missing<br>GT |
| 115239 | TruSeqV2    | 10:94841107 | 3'UTR    | G/G | 6.66E-16 | 0 | 0 | 19 | 57 | 1/1 | NC | 1/1 | missing<br>GT | match | missing<br>GT |
| 132306 | Agilent38MB | 10:94841107 | 3'UTR    | A/G | 2.44E-15 | 0 | 0 | 37 | 99 | 0/1 | NC | 0/1 | missing<br>GT | match | missing<br>GT |
| 163383 | TruSeqV2    | 10:94841107 | 3'UTR    | G/G | 1.11E-15 | 0 | 0 | 42 | 99 | 1/1 | NC | 1/1 | missing<br>GT | match | missing<br>GT |
| 198564 | Agilent38MB | 10:94841107 | 3'UTR    | A/G | 3.55E-15 | 0 | 0 | 51 | 99 | 0/1 | NC | 0/1 | missing<br>GT | match | missing<br>GT |
| 108971 | TruSeqV2    | 10:94841988 | 3'UTR    | C/C | 4.44E-16 | 0 | 0 | 36 | 90 | 0/0 | NC | 0/0 | missing<br>GT | match | missing<br>GT |
| 115239 | TruSeqV2    | 10:94841988 | 3'UTR    | C/C | 4.44E-16 | 0 | 0 | 38 | 99 | 0/0 | NC | 0/0 | missing<br>GT | match | missing<br>GT |
| 132306 | Agilent38MB | 10:94841988 | 3'UTR    | C/C | 4.44E-16 | 0 | 0 | 48 | 99 | 0/0 | NC | 0/0 | missing<br>GT | match | missing<br>GT |
| 163383 | TruSeqV2    | 10:94841988 | 3'UTR    | C/C | 6.66E-16 | 0 | 0 | 46 | 99 | 0/0 | NC | 0/0 | missing<br>GT | match | missing<br>GT |
| 108971 | TruSeqV2    | 10:94842213 | 3'UTR    | T/T | 2.78E-14 | 0 | 0 | 30 | 90 | 1/1 | NC | 1/1 | missing<br>GT | match | missing<br>GT |
| 115239 | TruSeqV2    | 10:94842213 | 3'UTR    | T/T | 1.55E-15 | 0 | 0 | 25 | 75 | 1/1 | NC | 1/1 | missing<br>GT | match | missing<br>GT |
| 132306 | Agilent38MB | 10:94842213 | 3'UTR    | G/T | 1.45E-11 | 0 | 0 | 27 | 99 | 0/1 | NC | 0/1 | missing<br>GT | match | missing<br>GT |
| 163383 | TruSeqV2    | 10:94842213 | 3'UTR    | G/T | 3.46E-12 | 0 | 0 | 20 | 99 | 0/1 | NC | 0/1 | missing<br>GT | match | missing<br>GT |
| 198564 | Agilent38MB | 10:94842213 | 3'UTR    | G/T | 6.91E-14 | 0 | 0 | 32 | 99 | 0/1 | NC | 0/1 | missing<br>GT | match | missing<br>GT |
| 132306 | Agilent38MB | 10:96495793 | 3'UTR    | C/C | 4.44E-16 | 0 | 0 | 45 | 99 | 0/0 | NC | 0/0 | missing<br>GT | match | missing<br>GT |
| 198564 | Agilent38MB | 10:96495793 | 3'UTR    | C/C | 2.49E-14 | 0 | 0 | 27 | 78 | 0/0 | NC | 0/0 | missing<br>GT | match | missing<br>GT |
| 108971 | TruSeqV2    | 10:96521657 | promoter | C/C | 3.33E-15 | 0 | 0 | 54 | 99 | 0/0 | NC | 0/0 | missing<br>GT | match | missing<br>GT |
| 115239 | TruSeqV2    | 10:96521657 | promoter | C/T | 1.41E-10 | 0 | 0 | 33 | 99 | 0/1 | NC | 0/1 | missing<br>GT | match | missing<br>GT |

|        |             |              |          |     |          |   |   |    |    |     |    |     |               |       |               |
|--------|-------------|--------------|----------|-----|----------|---|---|----|----|-----|----|-----|---------------|-------|---------------|
| 132306 | Agilent38MB | 10:96521657  | promoter | C/C | 3.55E-15 | 0 | 0 | 45 | 99 | 0/0 | NC | 0/0 | missing<br>GT | match | missing<br>GT |
| 163383 | TruSeqV2    | 10:96521657  | promoter | C/C | 1.78E-15 | 0 | 0 | 50 | 99 | 0/0 | NC | 0/0 | missing<br>GT | match | missing<br>GT |
| 108971 | TruSeqV2    | 11:114182507 | intronic | T/T | 1.40E-14 | 0 | 0 | 35 | 99 | 1/1 | NC | 1/1 | missing<br>GT | match | missing<br>GT |
| 115239 | TruSeqV2    | 11:114182507 | intronic | C/T | 1.55E-15 | 0 | 0 | 48 | 99 | 0/1 | NC | 0/1 | missing<br>GT | match | missing<br>GT |
| 132306 | Agilent38MB | 11:114182507 | intronic | T/T | 4.66E-15 | 0 | 0 | 28 | 84 | 1/1 | NC | 1/1 | missing<br>GT | match | missing<br>GT |
| 163383 | TruSeqV2    | 11:114182507 | intronic | C/T | 7.33E-15 | 0 | 0 | 44 | 99 | 0/1 | NC | 0/1 | missing<br>GT | match | missing<br>GT |
| 198564 | Agilent38MB | 11:114182507 | intronic | T/T | 1.49E-14 | 0 | 0 | 46 | 99 | 1/1 | NC | 1/1 | missing<br>GT | match | missing<br>GT |
| 108971 | TruSeqV2    | 11:45679197  | intronic | G/G | 1.33E-15 | 0 | 0 | 40 | 99 | 1/1 | NC | 1/1 | missing<br>GT | match | missing<br>GT |
| 115239 | TruSeqV2    | 11:45679197  | intronic | G/A | 1.78E-15 | 0 | 0 | 29 | 99 | 0/1 | NC | 0/1 | missing<br>GT | match | missing<br>GT |
| 163383 | TruSeqV2    | 11:45679197  | intronic | G/A | 8.88E-16 | 0 | 0 | 41 | 99 | 0/1 | NC | 0/1 | missing<br>GT | match | missing<br>GT |
| 108971 | TruSeqV2    | 11:45691619  | promoter | C/C | 4.44E-16 | 0 | 0 | 49 | 99 | 0/0 | NC | 0/0 | missing<br>GT | match | missing<br>GT |
| 115239 | TruSeqV2    | 11:45691619  | promoter | C/C | 6.66E-16 | 0 | 0 | 28 | 63 | 0/0 | NC | 0/0 | missing<br>GT | match | missing<br>GT |
| 132306 | Agilent38MB | 11:45691619  | promoter | C/C | 6.66E-16 | 0 | 0 | 34 | 90 | 0/0 | NC | 0/0 | missing<br>GT | match | missing<br>GT |
| 163383 | TruSeqV2    | 11:45691619  | promoter | C/C | 8.88E-16 | 0 | 0 | 38 | 99 | 0/0 | NC | 0/0 | missing<br>GT | match | missing<br>GT |
| 108971 | TruSeqV2    | 11:45695362  | promoter | C/C | 2.22E-16 | 0 | 0 | 45 | 99 | 1/1 | NC | 1/1 | missing<br>GT | match | missing<br>GT |
| 115239 | TruSeqV2    | 11:45695362  | promoter | C/C | 6.66E-16 | 0 | 0 | 39 | 99 | 1/1 | NC | 1/1 | missing<br>GT | match | missing<br>GT |
| 132306 | Agilent38MB | 11:45695362  | promoter | C/C | 2.22E-16 | 0 | 0 | 39 | 99 | 1/1 | NC | 1/1 | missing<br>GT | match | missing<br>GT |
| 163383 | TruSeqV2    | 11:45695362  | promoter | C/C | 4.44E-16 | 0 | 0 | 36 | 99 | 1/1 | NC | 1/1 | missing<br>GT | match | missing<br>GT |
| 198564 | Agilent38MB | 11:45695362  | promoter | C/C | 4.66E-15 | 0 | 0 | 46 | 99 | 1/1 | NC | 1/1 | missing<br>GT | match | missing<br>GT |

|        |             |             |          |     |          |   |   |    |    |     |    |     |               |       |               |
|--------|-------------|-------------|----------|-----|----------|---|---|----|----|-----|----|-----|---------------|-------|---------------|
| 108971 | TruSeqV2    | 11:45696153 | promoter | G/A | 1.27E-14 | 0 | 0 | 16 | 99 | 0/1 | NC | 0/1 | missing<br>GT | match | missing<br>GT |
| 115239 | TruSeqV2    | 11:45696153 | promoter | G/G | 3.55E-15 | 0 | 0 | 11 | 24 | 0/0 | NC | 0/0 | missing<br>GT | match | missing<br>GT |
| 132306 | Agilent38MB | 11:45696153 | promoter | G/G | 1.11E-15 | 0 | 0 | 15 | 33 | 0/0 | NC | 0/0 | missing<br>GT | match | missing<br>GT |
| 163383 | TruSeqV2    | 11:45696153 | promoter | G/G | 6.66E-16 | 0 | 0 | 16 | 45 | 0/0 | NC | 0/0 | missing<br>GT | match | missing<br>GT |
| 108971 | TruSeqV2    | 11:45696973 | promoter | A/A | 2.22E-16 | 0 | 0 | 42 | 96 | 0/0 | NC | 0/0 | missing<br>GT | match | missing<br>GT |
| 132306 | Agilent38MB | 11:45696973 | promoter | A/A | 2.22E-16 | 0 | 0 | 44 | 99 | 0/0 | NC | 0/0 | missing<br>GT | match | missing<br>GT |
| 163383 | TruSeqV2    | 11:45696973 | promoter | A/A | 2.22E-16 | 0 | 0 | 48 | 99 | 0/0 | NC | 0/0 | missing<br>GT | match | missing<br>GT |
| 198564 | Agilent38MB | 11:45696973 | promoter | A/A | 6.66E-16 | 0 | 0 | 34 | 96 | 0/0 | NC | 0/0 | missing<br>GT | match | missing<br>GT |
| 108971 | TruSeqV2    | 11:45697072 | promoter | C/C | 6.66E-16 | 0 | 0 | 33 | 99 | 1/1 | NC | 1/1 | missing<br>GT | match | missing<br>GT |
| 115239 | TruSeqV2    | 11:45697072 | promoter | G/C | 8.88E-15 | 0 | 0 | 26 | 91 | 0/1 | NC | 0/1 | missing<br>GT | match | missing<br>GT |
| 132306 | Agilent38MB | 11:45697072 | promoter | C/C | 2.66E-15 | 0 | 0 | 30 | 90 | 1/1 | NC | 1/1 | missing<br>GT | match | missing<br>GT |
| 163383 | TruSeqV2    | 11:45697072 | promoter | G/C | 1.07E-14 | 0 | 0 | 36 | 99 | 0/1 | NC | 0/1 | missing<br>GT | match | missing<br>GT |
| 198564 | Agilent38MB | 11:45697072 | promoter | G/C | 1.11E-15 | 0 | 0 | 36 | 99 | 0/1 | NC | 0/1 | missing<br>GT | match | missing<br>GT |
| 132306 | Agilent38MB | 11:62752014 | missense | C/C | 1.97E-09 | 0 | 0 | 28 | 61 | 0/0 | NC | 0/0 | missing<br>GT | match | missing<br>GT |
| 108971 | TruSeqV2    | 11:64333296 | intronic | G/G | 2.22E-15 | 0 | 0 | 42 | 99 | 1/1 | NC | 1/1 | missing<br>GT | match | missing<br>GT |
| 115239 | TruSeqV2    | 11:64333296 | intronic | G/G | 6.44E-15 | 0 | 0 | 28 | 84 | 1/1 | NC | 1/1 | missing<br>GT | match | missing<br>GT |
| 163383 | TruSeqV2    | 11:64333296 | intronic | A/A | 1.13E-14 | 0 | 0 | 38 | 93 | 0/0 | NC | 0/0 | missing<br>GT | match | missing<br>GT |
| 108971 | TruSeqV2    | 11:64334114 | intronic | T/T | 3.82E-14 | 0 | 0 | 32 | 95 | 1/1 | NC | 1/1 | missing<br>GT | match | missing<br>GT |
| 115239 | TruSeqV2    | 11:64334114 | intronic | C/T | 3.15E-14 | 0 | 0 | 23 | 99 | 0/1 | NC | 0/1 | missing<br>GT | match | missing<br>GT |

|        |             |              |          |     |          |   |   |    |    |     |    |     |               |       |               |
|--------|-------------|--------------|----------|-----|----------|---|---|----|----|-----|----|-----|---------------|-------|---------------|
| 132306 | Agilent38MB | 11:64334114  | intronic | C/T | 3.33E-15 | 0 | 0 | 35 | 99 | 0/1 | NC | 0/1 | missing<br>GT | match | missing<br>GT |
| 163383 | TruSeqV2    | 11:64334114  | intronic | C/C | 1.33E-15 | 0 | 0 | 19 | 57 | 0/0 | NC | 0/0 | missing<br>GT | match | missing<br>GT |
| 115239 | TruSeqV2    | 11:67351297  | 5'UTR    | G/G | 6.64E-11 | 0 | 0 | 4  | 12 | 0/0 | NC | 0/0 | missing<br>GT | match | missing<br>GT |
| 132306 | Agilent38MB | 11:74907421  | intronic | G/G | 5.33E-15 | 0 | 0 | 28 | 81 | 0/0 | NC | 0/0 | missing<br>GT | match | missing<br>GT |
| 108971 | TruSeqV2    | 12:105152391 | 3'UTR    | G/G | 4.44E-16 | 0 | 0 | 30 | 90 | 1/1 | NC | 1/1 | missing<br>GT | match | missing<br>GT |
| 132306 | Agilent38MB | 12:105152391 | 3'UTR    | A/G | 4.44E-16 | 0 | 0 | 36 | 99 | 0/1 | NC | 0/1 | missing<br>GT | match | missing<br>GT |
| 163383 | TruSeqV2    | 12:105152391 | 3'UTR    | G/G | 4.44E-16 | 0 | 0 | 37 | 99 | 1/1 | NC | 1/1 | missing<br>GT | match | missing<br>GT |
| 198564 | Agilent38MB | 12:105152391 | 3'UTR    | G/G | 6.66E-16 | 0 | 0 | 28 | 74 | 1/1 | NC | 1/1 | missing<br>GT | match | missing<br>GT |
| 108971 | TruSeqV2    | 12:105152960 | 3'UTR    | A/A | 6.66E-16 | 0 | 0 | 33 | 96 | 0/0 | NC | 0/0 | missing<br>GT | match | missing<br>GT |
| 115239 | TruSeqV2    | 12:105152960 | 3'UTR    | A/A | 2.22E-15 | 0 | 0 | 35 | 82 | 0/0 | NC | 0/0 | missing<br>GT | match | missing<br>GT |
| 163383 | TruSeqV2    | 12:105152960 | 3'UTR    | A/A | 6.66E-16 | 0 | 0 | 42 | 99 | 0/0 | NC | 0/0 | missing<br>GT | match | missing<br>GT |
| 198564 | Agilent38MB | 12:105152960 | 3'UTR    | A/A | 4.44E-16 | 0 | 0 | 33 | 93 | 0/0 | NC | 0/0 | missing<br>GT | match | missing<br>GT |
| 108971 | TruSeqV2    | 12:105152997 | 3'UTR    | C/C | 1.11E-15 | 0 | 0 | 41 | 99 | 1/1 | NC | 1/1 | missing<br>GT | match | missing<br>GT |
| 115239 | TruSeqV2    | 12:105152997 | 3'UTR    | C/C | 1.33E-15 | 0 | 0 | 27 | 81 | 1/1 | NC | 1/1 | missing<br>GT | match | missing<br>GT |
| 163383 | TruSeqV2    | 12:105152997 | 3'UTR    | C/C | 8.88E-16 | 0 | 0 | 36 | 98 | 1/1 | NC | 1/1 | missing<br>GT | match | missing<br>GT |
| 198564 | Agilent38MB | 12:105152997 | 3'UTR    | C/C | 8.88E-16 | 0 | 0 | 35 | 99 | 1/1 | NC | 1/1 | missing<br>GT | match | missing<br>GT |
| 108971 | TruSeqV2    | 12:105153570 | 3'UTR    | T/T | 6.22E-15 | 0 | 0 | 23 | 69 | 1/1 | NC | 1/1 | missing<br>GT | match | missing<br>GT |
| 115239 | TruSeqV2    | 12:105153570 | 3'UTR    | T/T | 2.89E-15 | 0 | 0 | 35 | 19 | 1/1 | NC | 1/1 | missing<br>GT | match | missing<br>GT |
| 163383 | TruSeqV2    | 12:105153570 | 3'UTR    | T/T | 7.11E-15 | 0 | 0 | 28 | 83 | 1/1 | NC | 1/1 | missing<br>GT | match | missing<br>GT |

|        |             |              |          |     |          |   |   |    |    |     |    |     |               |       |               |
|--------|-------------|--------------|----------|-----|----------|---|---|----|----|-----|----|-----|---------------|-------|---------------|
| 108971 | TruSeqV2    | 12:105154087 | 3'UTR    | A/A | 2.44E-15 | 0 | 0 | 40 | 99 | 1/1 | NC | 1/1 | missing<br>GT | match | missing<br>GT |
| 132306 | Agilent38MB | 12:105154087 | 3'UTR    | A/G | 5.24E-14 | 0 | 0 | 39 | 99 | 0/1 | NC | 0/1 | missing<br>GT | match | missing<br>GT |
| 163383 | TruSeqV2    | 12:105154087 | 3'UTR    | A/A | 1.11E-15 | 0 | 0 | 45 | 99 | 1/1 | NC | 1/1 | missing<br>GT | match | missing<br>GT |
| 198564 | Agilent38MB | 12:105154087 | 3'UTR    | A/A | 4.88E-15 | 0 | 0 | 46 | 99 | 1/1 | NC | 1/1 | missing<br>GT | match | missing<br>GT |
| 108971 | TruSeqV2    | 12:105155605 | 3'UTR    | T/T | 1.11E-15 | 0 | 0 | 29 | 87 | 1/1 | NC | 1/1 | missing<br>GT | match | missing<br>GT |
| 115239 | TruSeqV2    | 12:105155605 | 3'UTR    | T/T | 6.66E-16 | 0 | 0 | 31 | 93 | 1/1 | NC | 1/1 | missing<br>GT | match | missing<br>GT |
| 132306 | Agilent38MB | 12:105155605 | 3'UTR    | C/T | 3.11E-15 | 0 | 0 | 28 | 99 | 0/1 | NC | 0/1 | missing<br>GT | match | missing<br>GT |
| 163383 | TruSeqV2    | 12:105155605 | 3'UTR    | T/T | 6.66E-16 | 0 | 0 | 36 | 99 | 1/1 | NC | 1/1 | missing<br>GT | match | missing<br>GT |
| 198564 | Agilent38MB | 12:105155605 | 3'UTR    | T/T | 8.88E-16 | 0 | 0 | 41 | 99 | 1/1 | NC | 1/1 | missing<br>GT | match | missing<br>GT |
| 108971 | TruSeqV2    | 12:105155627 | 3'UTR    | A/A | 2.00E-15 | 0 | 0 | 26 | 69 | 0/0 | NC | 0/0 | missing<br>GT | match | missing<br>GT |
| 115239 | TruSeqV2    | 12:105155627 | 3'UTR    | A/A | 1.11E-15 | 0 | 0 | 35 | 61 | 0/0 | NC | 0/0 | missing<br>GT | match | missing<br>GT |
| 163383 | TruSeqV2    | 12:105155627 | 3'UTR    | A/A | 1.78E-15 | 0 | 0 | 33 | 93 | 0/0 | NC | 0/0 | missing<br>GT | match | missing<br>GT |
| 198564 | Agilent38MB | 12:105155627 | 3'UTR    | A/A | 1.11E-15 | 0 | 0 | 41 | 99 | 0/0 | NC | 0/0 | missing<br>GT | match | missing<br>GT |
| 108971 | TruSeqV2    | 12:21283322  | promoter | G/G | 2.44E-15 | 0 | 0 | 49 | 99 | 0/0 | NC | 0/0 | missing<br>GT | match | missing<br>GT |
| 115239 | TruSeqV2    | 12:21283322  | promoter | G/G | 3.55E-15 | 0 | 0 | 46 | 99 | 0/0 | NC | 0/0 | missing<br>GT | match | missing<br>GT |
| 132306 | Agilent38MB | 12:21283322  | promoter | G/G | 1.11E-15 | 0 | 0 | 44 | 99 | 0/0 | NC | 0/0 | missing<br>GT | match | missing<br>GT |
| 163383 | TruSeqV2    | 12:21283322  | promoter | G/G | 1.33E-15 | 0 | 0 | 46 | 99 | 0/0 | NC | 0/0 | missing<br>GT | match | missing<br>GT |
| 198564 | Agilent38MB | 12:21283322  | promoter | G/G | 3.11E-15 | 0 | 0 | 51 | 99 | 0/0 | NC | 0/0 | missing<br>GT | match | missing<br>GT |
| 108971 | TruSeqV2    | 12:21475091  | intronic | C/C | 1.55E-15 | 0 | 0 | 51 | 99 | 0/0 | NC | 0/0 | missing<br>GT | match | missing<br>GT |

|        |             |             |          |     |          |   |   |    |    |     |    |     |               |       |               |
|--------|-------------|-------------|----------|-----|----------|---|---|----|----|-----|----|-----|---------------|-------|---------------|
| 115239 | TruSeqV2    | 12:21475091 | intronic | C/C | 1.11E-15 | 0 | 0 | 42 | 99 | 0/0 | NC | 0/0 | missing<br>GT | match | missing<br>GT |
| 132306 | Agilent38MB | 12:21475091 | intronic | C/C | 4.20E-14 | 0 | 0 | 46 | 99 | 0/0 | NC | 0/0 | missing<br>GT | match | missing<br>GT |
| 163383 | TruSeqV2    | 12:21475091 | intronic | C/C | 9.10E-15 | 0 | 0 | 43 | 99 | 0/0 | NC | 0/0 | missing<br>GT | match | missing<br>GT |
| 198564 | Agilent38MB | 12:21475091 | intronic | C/C | 6.11E-14 | 0 | 0 | 63 | 99 | 0/0 | NC | 0/0 | missing<br>GT | match | missing<br>GT |
| 108971 | TruSeqV2    | 12:21475627 | intronic | T/T | 4.44E-16 | 0 | 0 | 47 | 99 | 0/0 | NC | 0/0 | missing<br>GT | match | missing<br>GT |
| 115239 | TruSeqV2    | 12:21475627 | intronic | T/T | 4.44E-16 | 0 | 0 | 32 | 72 | 0/0 | NC | 0/0 | missing<br>GT | match | missing<br>GT |
| 163383 | TruSeqV2    | 12:21475627 | intronic | T/T | 4.44E-16 | 0 | 0 | 36 | 84 | 0/0 | NC | 0/0 | missing<br>GT | match | missing<br>GT |
| 198564 | Agilent38MB | 12:21475627 | intronic | T/T | 4.44E-16 | 0 | 0 | 48 | 99 | 0/0 | NC | 0/0 | missing<br>GT | match | missing<br>GT |
| 108971 | TruSeqV2    | 12:21476591 | intronic | G/G | 2.22E-16 | 0 | 0 | 64 | 99 | 0/0 | NC | 0/0 | missing<br>GT | match | missing<br>GT |
| 115239 | TruSeqV2    | 12:21476591 | intronic | G/G | 4.44E-16 | 0 | 0 | 53 | 99 | 0/0 | NC | 0/0 | missing<br>GT | match | missing<br>GT |
| 132306 | Agilent38MB | 12:21476591 | intronic | G/G | 2.22E-16 | 0 | 0 | 46 | 99 | 0/0 | NC | 0/0 | missing<br>GT | match | missing<br>GT |
| 163383 | TruSeqV2    | 12:21476591 | intronic | G/G | 4.44E-16 | 0 | 0 | 38 | 96 | 0/0 | NC | 0/0 | missing<br>GT | match | missing<br>GT |
| 198564 | Agilent38MB | 12:21476591 | intronic | G/G | 2.89E-15 | 0 | 0 | 57 | 99 | 0/0 | NC | 0/0 | missing<br>GT | match | missing<br>GT |
| 108971 | TruSeqV2    | 12:21476983 | intronic | A/A | 6.66E-16 | 0 | 0 | 44 | 99 | 0/0 | NC | 0/0 | missing<br>GT | match | missing<br>GT |
| 115239 | TruSeqV2    | 12:21476983 | intronic | A/A | 4.44E-16 | 0 | 0 | 50 | 99 | 0/0 | NC | 0/0 | missing<br>GT | match | missing<br>GT |
| 132306 | Agilent38MB | 12:21476983 | intronic | A/A | 1.11E-15 | 0 | 0 | 31 | 84 | 0/0 | NC | 0/0 | missing<br>GT | match | missing<br>GT |
| 163383 | TruSeqV2    | 12:21476983 | intronic | A/A | 2.22E-15 | 0 | 0 | 50 | 99 | 0/0 | NC | 0/0 | missing<br>GT | match | missing<br>GT |
| 115239 | TruSeqV2    | 12:21477462 | intronic | T/A | 2.44E-15 | 0 | 0 | 44 | 99 | 0/1 | NC | 0/1 | missing<br>GT | match | missing<br>GT |
| 132306 | Agilent38MB | 12:21477462 | intronic | T/A | 4.44E-15 | 0 | 0 | 46 | 99 | 0/1 | NC | 0/1 | missing<br>GT | match | missing<br>GT |

|        |             |              |          |     |          |   |   |    |    |     |    |     |               |       |               |
|--------|-------------|--------------|----------|-----|----------|---|---|----|----|-----|----|-----|---------------|-------|---------------|
| 163383 | TruSeqV2    | 12:21477462  | intronic | A/A | 1.82E-14 | 0 | 0 | 44 | 99 | 0/0 | NC | 0/0 | missing<br>GT | match | missing<br>GT |
| 198564 | Agilent38MB | 12:21477462  | intronic | T/A | 2.00E-15 | 0 | 0 | 45 | 99 | 0/1 | NC | 0/1 | missing<br>GT | match | missing<br>GT |
| 132306 | Agilent38MB | 12:58156510  | 3'UTR    | C/C | 4.44E-16 | 0 | 0 | 52 | 99 | 0/0 | NC | 0/0 | missing<br>GT | match | missing<br>GT |
| 198564 | Agilent38MB | 13:103696987 | 3'UTR    | T/C | 1.24E-13 | 0 | 0 | 33 | 99 | 0/1 | NC | 0/1 | missing<br>GT | match | missing<br>GT |
| 132306 | Agilent38MB | 13:103697728 | 3'UTR    | G/G | 6.66E-16 | 0 | 0 | 35 | 56 | 0/0 | NC | 0/0 | missing<br>GT | match | missing<br>GT |
| 198564 | Agilent38MB | 13:103697728 | 3'UTR    | G/G | 4.66E-15 | 0 | 0 | 43 | 99 | 0/0 | NC | 0/0 | missing<br>GT | match | missing<br>GT |
| 132306 | Agilent38MB | 13:103698110 | 3'UTR    | G/G | 6.66E-16 | 0 | 0 | 23 | 63 | 0/0 | NC | 0/0 | missing<br>GT | match | missing<br>GT |
| 198564 | Agilent38MB | 13:103698110 | 3'UTR    | G/G | 6.66E-16 | 0 | 0 | 47 | 99 | 0/0 | NC | 0/0 | missing<br>GT | match | missing<br>GT |
| 132306 | Agilent38MB | 13:103698168 | 3'UTR    | C/A | 3.13E-14 | 0 | 0 | 39 | 99 | 0/1 | NC | 0/1 | missing<br>GT | match | missing<br>GT |
| 198564 | Agilent38MB | 13:103698168 | 3'UTR    | C/C | 1.31E-14 | 0 | 0 | 36 | 97 | 1/1 | NC | 1/1 | missing<br>GT | match | missing<br>GT |
| 132306 | Agilent38MB | 13:103719056 | 5'UTR    | T/T | 7.11E-15 | 0 | 0 | 54 | 99 | 0/0 | NC | 0/0 | missing<br>GT | match | missing<br>GT |
| 198564 | Agilent38MB | 13:103719056 | 5'UTR    | T/T | 2.44E-15 | 0 | 0 | 45 | 99 | 0/0 | NC | 0/0 | missing<br>GT | match | missing<br>GT |
| 132306 | Agilent38MB | 13:52507720  | 3'UTR    | C/C | 1.11E-15 | 0 | 0 | 32 | 90 | 0/0 | NC | 0/0 | missing<br>GT | match | missing<br>GT |
| 198564 | Agilent38MB | 13:52507720  | 3'UTR    | T/C | 8.88E-16 | 0 | 0 | 46 | 99 | 0/1 | NC | 0/1 | missing<br>GT | match | missing<br>GT |
| 132306 | Agilent38MB | 13:95672265  | 3'UTR    | T/T | 2.22E-16 | 0 | 0 | 35 | 99 | 1/1 | NC | 1/1 | missing<br>GT | match | missing<br>GT |
| 198564 | Agilent38MB | 13:95672265  | 3'UTR    | T/T | 1.55E-15 | 0 | 0 | 52 | 99 | 1/1 | NC | 1/1 | missing<br>GT | match | missing<br>GT |
| 132306 | Agilent38MB | 13:95672478  | 3'UTR    | A/A | 5.33E-15 | 0 | 0 | 36 | 99 | 0/0 | NC | 0/0 | missing<br>GT | match | missing<br>GT |
| 198564 | Agilent38MB | 13:95672478  | 3'UTR    | A/A | 4.44E-16 | 0 | 0 | 53 | 99 | 0/0 | NC | 0/0 | missing<br>GT | match | missing<br>GT |
| 132306 | Agilent38MB | 13:95672547  | 3'UTR    | A/A | 4.44E-16 | 0 | 0 | 43 | 99 | 0/0 | NC | 0/0 | missing<br>GT | match | missing<br>GT |



|        |             |              |          |     |          |   |   |    |    |     |    |     |               |       |               |
|--------|-------------|--------------|----------|-----|----------|---|---|----|----|-----|----|-----|---------------|-------|---------------|
| 198564 | Agilent38MB | 13:95672547  | 3'UTR    | A/A | 1.55E-15 | 0 | 0 | 44 | 99 | 0/0 | NC | 0/0 | missing<br>GT | match | missing<br>GT |
| 132306 | Agilent38MB | 13:95672950  | 3'UTR    | A/A | 1.55E-15 | 0 | 0 | 35 | 90 | 0/0 | NC | 0/0 | missing<br>GT | match | missing<br>GT |
| 198564 | Agilent38MB | 13:95672950  | 3'UTR    | G/G | 2.22E-15 | 0 | 0 | 42 | 99 | 1/1 | NC | 1/1 | missing<br>GT | match | missing<br>GT |
| 132306 | Agilent38MB | 13:95673135  | 3'UTR    | C/C | 6.66E-16 | 0 | 0 | 28 | 75 | 0/0 | NC | 0/0 | missing<br>GT | match | missing<br>GT |
| 198564 | Agilent38MB | 13:95673135  | 3'UTR    | T/T | 2.75E-14 | 0 | 0 | 29 | 87 | 1/1 | NC | 1/1 | missing<br>GT | match | missing<br>GT |
| 132306 | Agilent38MB | 13:95673518  | 3'UTR    | C/C | 5.33E-15 | 0 | 0 | 29 | 87 | 1/1 | NC | 1/1 | missing<br>GT | match | missing<br>GT |
| 198564 | Agilent38MB | 13:95673518  | 3'UTR    | T/T | 4.00E-15 | 0 | 0 | 49 | 99 | 0/0 | NC | 0/0 | missing<br>GT | match | missing<br>GT |
| 108971 | TruSeqV2    | 14:100193559 | 3'UTR    | G/G | 4.44E-16 | 0 | 0 | 39 | 99 | 0/0 | NC | 0/0 | missing<br>GT | match | missing<br>GT |
| 163383 | TruSeqV2    | 14:100193559 | 3'UTR    | G/G | 4.44E-16 | 0 | 0 | 27 | 72 | 0/0 | NC | 0/0 | missing<br>GT | match | missing<br>GT |
| 108971 | TruSeqV2    | 14:23282110  | synon    | G/A | 1.08E-13 | 0 | 0 | 39 | 99 | 0/1 | NC | 0/1 | missing<br>GT | match | missing<br>GT |
| 132306 | Agilent38MB | 14:23284572  | 5'UTR    | G/A | 2.89E-15 | 0 | 0 | 29 | 99 | 0/1 | NC | 0/1 | missing<br>GT | match | missing<br>GT |
| 132306 | Agilent38MB | 14:23595721  | 3'UTR    | A/A | 6.66E-16 | 0 | 0 | 30 | 84 | 0/0 | NC | 0/0 | missing<br>GT | match | missing<br>GT |
| 108971 | TruSeqV2    | 14:23632506  | intronic | A/A | 3.11E-15 | 0 | 0 | 19 | 54 | 0/0 | NC | 0/0 | missing<br>GT | match | missing<br>GT |
| 115239 | TruSeqV2    | 14:23632506  | intronic | A/A | 3.55E-15 | 0 | 0 | 31 | 81 | 0/0 | NC | 0/0 | missing<br>GT | match | missing<br>GT |
| 132306 | Agilent38MB | 14:23632506  | intronic | A/A | 1.33E-15 | 0 | 0 | 24 | 63 | 0/0 | NC | 0/0 | missing<br>GT | match | missing<br>GT |
| 163383 | TruSeqV2    | 14:23632506  | intronic | A/A | 1.53E-14 | 0 | 0 | 24 | 69 | 0/0 | NC | 0/0 | missing<br>GT | match | missing<br>GT |
| 108971 | TruSeqV2    | 14:23636757  | intronic | G/A | 1.37E-13 | 0 | 0 | 39 | 99 | 0/1 | NC | 0/1 | missing<br>GT | match | missing<br>GT |
| 115239 | TruSeqV2    | 14:23636757  | intronic | G/A | 2.38E-14 | 0 | 0 | 20 | 44 | 0/1 | NC | 0/1 | missing<br>GT | match | missing<br>GT |
| 163383 | TruSeqV2    | 14:23636757  | intronic | A/A | 2.22E-15 | 0 | 0 | 36 | 96 | 0/0 | NC | 0/0 | missing<br>GT | match | missing<br>GT |

|        |             |             |          |     |          |   |   |    |    |     |    |     |               |       |               |
|--------|-------------|-------------|----------|-----|----------|---|---|----|----|-----|----|-----|---------------|-------|---------------|
| 198564 | Agilent38MB | 14:23636757 | intronic | A/A | 6.66E-16 | 0 | 0 | 37 | 95 | 0/0 | NC | 0/0 | missing<br>GT | match | missing<br>GT |
| 108971 | TruSeqV2    | 14:23640794 | intronic | G/A | 1.53E-14 | 0 | 0 | 36 | 99 | 0/1 | NC | 0/1 | missing<br>GT | match | missing<br>GT |
| 115239 | TruSeqV2    | 14:23640794 | intronic | G/A | 5.71E-14 | 0 | 0 | 26 | 99 | 0/1 | NC | 0/1 | missing<br>GT | match | missing<br>GT |
| 163383 | TruSeqV2    | 14:23640794 | intronic | A/A | 2.89E-15 | 0 | 0 | 36 | 84 | 0/0 | NC | 0/0 | missing<br>GT | match | missing<br>GT |
| 198564 | Agilent38MB | 14:23640794 | intronic | A/A | 2.22E-15 | 0 | 0 | 43 | 99 | 0/0 | NC | 0/0 | missing<br>GT | match | missing<br>GT |
| 108971 | TruSeqV2    | 14:23649792 | intronic | A/A | 6.66E-16 | 0 | 0 | 24 | 69 | 0/0 | NC | 0/0 | missing<br>GT | match | missing<br>GT |
| 115239 | TruSeqV2    | 14:23649792 | intronic | A/A | 4.44E-16 | 0 | 0 | 40 | 99 | 0/0 | NC | 0/0 | missing<br>GT | match | missing<br>GT |
| 132306 | Agilent38MB | 14:23649792 | intronic | A/A | 8.88E-16 | 0 | 0 | 31 | 90 | 0/0 | NC | 0/0 | missing<br>GT | match | missing<br>GT |
| 163383 | TruSeqV2    | 14:23649792 | intronic | A/A | 6.66E-16 | 0 | 0 | 31 | 84 | 0/0 | NC | 0/0 | missing<br>GT | match | missing<br>GT |
| 198564 | Agilent38MB | 14:23649792 | intronic | A/A | 6.66E-16 | 0 | 0 | 31 | 84 | 0/0 | NC | 0/0 | missing<br>GT | match | missing<br>GT |
| 108971 | TruSeqV2    | 14:23653188 | promoter | C/A | 2.22E-15 | 0 | 0 | 33 | 99 | 0/1 | NC | 0/1 | missing<br>GT | match | missing<br>GT |
| 115239 | TruSeqV2    | 14:23653188 | promoter | C/C | 2.00E-15 | 0 | 0 | 29 | 60 | 0/0 | NC | 0/0 | missing<br>GT | match | missing<br>GT |
| 132306 | Agilent38MB | 14:23653188 | promoter | A/A | 6.66E-16 | 0 | 0 | 36 | 99 | 1/1 | NC | 1/1 | missing<br>GT | match | missing<br>GT |
| 163383 | TruSeqV2    | 14:23653188 | promoter | A/A | 1.78E-15 | 0 | 0 | 30 | 90 | 1/1 | NC | 1/1 | missing<br>GT | match | missing<br>GT |
| 198564 | Agilent38MB | 14:23653188 | promoter | A/A | 3.38E-14 | 0 | 0 | 44 | 99 | 1/1 | NC | 1/1 | missing<br>GT | match | missing<br>GT |
| 132306 | Agilent38MB | 15:51502082 | 3'UTR    | A/A | 2.22E-16 | 0 | 0 | 49 | 99 | 0/0 | NC | 0/0 | missing<br>GT | match | missing<br>GT |
| 198564 | Agilent38MB | 15:51502082 | 3'UTR    | A/A | 2.00E-15 | 0 | 0 | 44 | 99 | 0/0 | NC | 0/0 | missing<br>GT | match | missing<br>GT |
| 132306 | Agilent38MB | 15:51502298 | 3'UTR    | A/A | 2.22E-15 | 0 | 0 | 35 | 99 | 0/0 | NC | 0/0 | missing<br>GT | match | missing<br>GT |
| 198564 | Agilent38MB | 15:51502298 | 3'UTR    | A/A | 6.66E-16 | 0 | 0 | 48 | 99 | 0/0 | NC | 0/0 | missing<br>GT | match | missing<br>GT |

|        |             |             |          |     |          |   |   |    |    |     |    |     |               |       |               |
|--------|-------------|-------------|----------|-----|----------|---|---|----|----|-----|----|-----|---------------|-------|---------------|
| 108971 | TruSeqV2    | 15:51547938 | intronic | G/C | 2.00E-15 | 0 | 0 | 32 | 99 | 0/1 | NC | 0/1 | missing<br>GT | match | missing<br>GT |
| 115239 | TruSeqV2    | 15:51547938 | intronic | G/C | 4.22E-15 | 0 | 0 | 30 | 99 | 0/1 | NC | 0/1 | missing<br>GT | match | missing<br>GT |
| 132306 | Agilent38MB | 15:51547938 | intronic | C/C | 3.55E-15 | 0 | 0 | 36 | 99 | 0/0 | NC | 0/0 | missing<br>GT | match | missing<br>GT |
| 163383 | TruSeqV2    | 15:51547938 | intronic | C/C | 3.55E-15 | 0 | 0 | 37 | 99 | 0/0 | NC | 0/0 | missing<br>GT | match | missing<br>GT |
| 198564 | Agilent38MB | 15:75012235 | 3'UTR    | A/A | 3.33E-15 | 0 | 0 | 41 | 99 | 0/0 | NC | 0/0 | missing<br>GT | match | missing<br>GT |
| 108971 | TruSeqV2    | 15:75038220 | promoter | G/G | 2.66E-15 | 0 | 0 | 44 | 99 | 0/0 | NC | 0/0 | missing<br>GT | match | missing<br>GT |
| 115239 | TruSeqV2    | 15:75038220 | promoter | G/G | 2.66E-15 | 0 | 0 | 32 | 90 | 0/0 | NC | 0/0 | missing<br>GT | match | missing<br>GT |
| 132306 | Agilent38MB | 15:75038220 | promoter | G/G | 8.88E-15 | 0 | 0 | 43 | 99 | 0/0 | NC | 0/0 | missing<br>GT | match | missing<br>GT |
| 163383 | TruSeqV2    | 15:75038220 | promoter | G/G | 1.55E-15 | 0 | 0 | 37 | 96 | 0/0 | NC | 0/0 | missing<br>GT | match | missing<br>GT |
| 198564 | Agilent38MB | 15:75038220 | promoter | A/G | 2.89E-15 | 0 | 0 | 38 | 99 | 0/1 | NC | 0/1 | missing<br>GT | match | missing<br>GT |
| 108971 | TruSeqV2    | 15:75039613 | promoter | T/T | 1.40E-14 | 0 | 0 | 27 | 75 | 0/0 | NC | 0/0 | missing<br>GT | match | missing<br>GT |
| 132306 | Agilent38MB | 15:75039613 | promoter | T/T | 1.91E-14 | 0 | 0 | 27 | 75 | 0/0 | NC | 0/0 | missing<br>GT | match | missing<br>GT |
| 163383 | TruSeqV2    | 15:75039613 | promoter | T/T | 1.07E-14 | 0 | 0 | 27 | 75 | 0/0 | NC | 0/0 | missing<br>GT | match | missing<br>GT |
| 198564 | Agilent38MB | 15:75041351 | intronic | C/C | 4.44E-16 | 0 | 0 | 58 | 99 | 0/0 | NC | 0/0 | missing<br>GT | match | missing<br>GT |
| 132306 | Agilent38MB | 15:85488572 | 3'UTR    | G/G | 8.88E-16 | 0 | 0 | 25 | 74 | 1/1 | NC | 1/1 | missing<br>GT | match | missing<br>GT |
| 108971 | TruSeqV2    | 15:92685078 | intronic | A/G | 1.11E-15 | 0 | 0 | 36 | 99 | 0/1 | NC | 0/1 | missing<br>GT | match | missing<br>GT |
| 115239 | TruSeqV2    | 15:92685078 | intronic | A/G | 2.22E-15 | 0 | 0 | 38 | 99 | 0/1 | NC | 0/1 | missing<br>GT | match | missing<br>GT |
| 132306 | Agilent38MB | 15:92685078 | intronic | A/G | 1.11E-15 | 0 | 0 | 29 | 99 | 0/1 | NC | 0/1 | missing<br>GT | match | missing<br>GT |
| 163383 | TruSeqV2    | 15:92685078 | intronic | G/G | 5.33E-15 | 0 | 0 | 32 | 90 | 0/0 | NC | 0/0 | missing<br>GT | match | missing<br>GT |

|        |             |             |          |     |          |   |   |    |    |     |    |     |               |       |               |
|--------|-------------|-------------|----------|-----|----------|---|---|----|----|-----|----|-----|---------------|-------|---------------|
| 198564 | Agilent38MB | 15:92685078 | intronic | A/A | 6.44E-15 | 0 | 0 | 37 | 99 | 1/1 | NC | 1/1 | missing<br>GT | match | missing<br>GT |
| 108971 | TruSeqV2    | 15:92689112 | intronic | G/G | 7.13E-14 | 0 | 0 | 30 | 90 | 1/1 | NC | 1/1 | missing<br>GT | match | missing<br>GT |
| 115239 | TruSeqV2    | 15:92689112 | intronic | A/G | 4.66E-15 | 0 | 0 | 24 | 99 | 0/1 | NC | 0/1 | missing<br>GT | match | missing<br>GT |
| 132306 | Agilent38MB | 15:92689112 | intronic | A/G | 5.75E-14 | 0 | 0 | 23 | 99 | 0/1 | NC | 0/1 | missing<br>GT | match | missing<br>GT |
| 163383 | TruSeqV2    | 15:92689112 | intronic | A/G | 1.35E-14 | 0 | 0 | 28 | 99 | 0/1 | NC | 0/1 | missing<br>GT | match | missing<br>GT |
| 198564 | Agilent38MB | 15:92689112 | intronic | G/G | 3.77E-15 | 0 | 0 | 31 | 92 | 1/1 | NC | 1/1 | missing<br>GT | match | missing<br>GT |
| 115239 | TruSeqV2    | 15:92698643 | intronic | C/C | 4.44E-16 | 0 | 0 | 22 | 66 | 1/1 | NC | 1/1 | missing<br>GT | match | missing<br>GT |
| 132306 | Agilent38MB | 15:92698643 | intronic | C/G | 1.78E-15 | 0 | 0 | 33 | 99 | 0/1 | NC | 0/1 | missing<br>GT | match | missing<br>GT |
| 163383 | TruSeqV2    | 15:92698643 | intronic | C/G | 1.78E-15 | 0 | 0 | 31 | 99 | 0/1 | NC | 0/1 | missing<br>GT | match | missing<br>GT |
| 108971 | TruSeqV2    | 15:92707569 | 3'UTR    | A/G | 6.66E-16 | 0 | 0 | 38 | 99 | 0/1 | NC | 0/1 | missing<br>GT | match | missing<br>GT |
| 115239 | TruSeqV2    | 15:92707569 | 3'UTR    | A/G | 6.66E-16 | 0 | 0 | 53 | 99 | 0/1 | NC | 0/1 | missing<br>GT | match | missing<br>GT |
| 132306 | Agilent38MB | 15:92707569 | 3'UTR    | A/G | 2.22E-15 | 0 | 0 | 33 | 99 | 0/1 | NC | 0/1 | missing<br>GT | match | missing<br>GT |
| 163383 | TruSeqV2    | 15:92707569 | 3'UTR    | A/G | 8.88E-16 | 0 | 0 | 41 | 99 | 0/1 | NC | 0/1 | missing<br>GT | match | missing<br>GT |
| 198564 | Agilent38MB | 15:92707569 | 3'UTR    | A/G | 1.33E-15 | 0 | 0 | 47 | 99 | 0/1 | NC | 0/1 | missing<br>GT | match | missing<br>GT |
| 132306 | Agilent38MB | 16:1273803  | intronic | C/C | 1.67E-14 | 0 | 0 | 19 | 51 | 0/0 | NC | 0/0 | missing<br>GT | match | missing<br>GT |
| 198564 | Agilent38MB | 16:16236004 | 3'UTR    | A/T | 1.11E-15 | 0 | 0 | 35 | 99 | 0/1 | NC | 0/1 | missing<br>GT | match | missing<br>GT |
| 132306 | Agilent38MB | 16:16236431 | 3'UTR    | G/G | 8.88E-16 | 0 | 0 | 48 | 99 | 0/0 | NC | 0/0 | missing<br>GT | match | missing<br>GT |
| 198564 | Agilent38MB | 16:16236431 | 3'UTR    | A/G | 3.11E-15 | 0 | 0 | 45 | 99 | 0/1 | NC | 0/1 | missing<br>GT | match | missing<br>GT |
| 132306 | Agilent38MB | 16:16236523 | 3'UTR    | G/G | 9.42E-11 | 0 | 0 | 41 | 99 | 1/1 | NC | 1/1 | missing<br>GT | match | missing<br>GT |

|        |             |             |                               |     |          |   |   |    |    |     |    |     |               |       |               |
|--------|-------------|-------------|-------------------------------|-----|----------|---|---|----|----|-----|----|-----|---------------|-------|---------------|
| 198564 | Agilent38MB | 16:16236523 | 3'UTR                         | G/G | 4.44E-16 | 0 | 0 | 37 | 99 | 1/1 | NC | 1/1 | missing<br>GT | match | missing<br>GT |
| 132306 | Agilent38MB | 16:16236650 | 3'UTR                         | C/T | 4.01E-13 | 0 | 0 | 30 | 99 | 0/1 | NC | 0/1 | missing<br>GT | match | missing<br>GT |
| 198564 | Agilent38MB | 16:16236650 | 3'UTR                         | C/T | 3.55E-15 | 0 | 0 | 33 | 99 | 0/1 | NC | 0/1 | missing<br>GT | match | missing<br>GT |
| 163383 | TruSeqV2    | 16:16276737 | missense                      | A/A | 6.66E-16 | 0 | 0 | 41 | 99 | 0/0 | NC | 0/0 | missing<br>GT | match | missing<br>GT |
| 132306 | Agilent38MB | 16:28607232 | missense<br>alternate<br>exon | G/G | 1.11E-15 | 0 | 0 | 23 | 69 | 1/1 | NC | 1/1 | missing<br>GT | match | missing<br>GT |
| 198564 | Agilent38MB | 16:29473201 | missense<br>alternate<br>exon | C/C | 2.22E-16 | 0 | 0 | 8  | 24 | 0/0 | NC | 0/0 | missing<br>GT | match | missing<br>GT |
| 108971 | TruSeqV2    | 16:29656093 | intronic                      | C/C | 1.69E-10 | 0 | 0 | 41 | 99 | 0/0 | NC | 0/0 | missing<br>GT | match | missing<br>GT |
| 115239 | TruSeqV2    | 16:29656093 | intronic                      | C/C | 2.87E-13 | 0 | 0 | 26 | 72 | 0/0 | NC | 0/0 | missing<br>GT | match | missing<br>GT |
| 163383 | TruSeqV2    | 16:29656093 | intronic                      | C/C | 4.02E-14 | 0 | 0 | 28 | 75 | 0/0 | NC | 0/0 | missing<br>GT | match | missing<br>GT |
| 198564 | Agilent38MB | 16:29656093 | intronic                      | C/C | 5.47E-12 | 0 | 0 | 43 | 99 | 0/0 | NC | 0/0 | missing<br>GT | match | missing<br>GT |
| 108971 | TruSeqV2    | 16:29661217 | intronic                      | T/C | 1.55E-15 | 0 | 0 | 29 | 99 | 0/1 | NC | 0/1 | missing<br>GT | match | missing<br>GT |
| 163383 | TruSeqV2    | 16:29661217 | intronic                      | C/C | 2.51E-13 | 0 | 0 | 37 | 96 | 0/0 | NC | 0/0 | missing<br>GT | match | missing<br>GT |
| 198564 | Agilent38MB | 16:29661217 | intronic                      | T/C | 1.33E-15 | 0 | 0 | 39 | 99 | 0/1 | NC | 0/1 | missing<br>GT | match | missing<br>GT |
| 108971 | TruSeqV2    | 16:29666736 | intronic                      | A/A | 7.33E-15 | 0 | 0 | 26 | 78 | 1/1 | NC | 1/1 | missing<br>GT | match | missing<br>GT |
| 115239 | TruSeqV2    | 16:29666736 | intronic                      | G/G | 3.11E-15 | 0 | 0 | 23 | 54 | 0/0 | NC | 0/0 | missing<br>GT | match | missing<br>GT |
| 132306 | Agilent38MB | 16:29666736 | intronic                      | G/A | 1.11E-15 | 0 | 0 | 28 | 99 | 0/1 | NC | 0/1 | missing<br>GT | match | missing<br>GT |
| 163383 | TruSeqV2    | 16:29666736 | intronic                      | G/G | 4.66E-15 | 0 | 0 | 32 | 81 | 0/0 | NC | 0/0 | missing<br>GT | match | missing<br>GT |
| 108971 | TruSeqV2    | 16:29668253 | promoter                      | G/G | 5.82E-14 | 0 | 0 | 37 | 96 | 0/0 | NC | 0/0 | missing<br>GT | match | missing<br>GT |
| 132306 | Agilent38MB | 16:29668253 | promoter                      | G/G | 1.20E-14 | 0 | 0 | 31 | 72 | 0/0 | NC | 0/0 | missing<br>GT | match | missing<br>GT |

|        |             |             |            |     |          |   |   |    |    |     |    |     |               |       |               |
|--------|-------------|-------------|------------|-----|----------|---|---|----|----|-----|----|-----|---------------|-------|---------------|
| 163383 | TruSeqV2    | 16:29668253 | promoter   | G/G | 8.88E-16 | 0 | 0 | 31 | 69 | 0/0 | NC | 0/0 | missing<br>GT | match | missing<br>GT |
| 108971 | TruSeqV2    | 16:29687360 | promoter   | T/T | 1.55E-15 | 0 | 0 | 35 | 99 | 1/1 | NC | 1/1 | missing<br>GT | match | missing<br>GT |
| 115239 | TruSeqV2    | 16:29687360 | promoter   | C/T | 7.33E-14 | 0 | 0 | 45 | 99 | 0/1 | NC | 0/1 | missing<br>GT | match | missing<br>GT |
| 132306 | Agilent38MB | 16:29687360 | promoter   | T/T | 4.44E-16 | 0 | 0 | 31 | 93 | 1/1 | NC | 1/1 | missing<br>GT | match | missing<br>GT |
| 163383 | TruSeqV2    | 16:29687360 | promoter   | C/T | 1.07E-14 | 0 | 0 | 38 | 99 | 0/1 | NC | 0/1 | missing<br>GT | match | missing<br>GT |
| 198564 | Agilent38MB | 16:29687360 | promoter   | T/T | 3.55E-15 | 0 | 0 | 42 | 99 | 1/1 | NC | 1/1 | missing<br>GT | match | missing<br>GT |
| 115239 | TruSeqV2    | 16:29747291 | Intergenic | G/T | 5.74E-12 | 0 | 0 | 34 | 99 | 0/1 | NC | 0/1 | missing<br>GT | match | missing<br>GT |
| 132306 | Agilent38MB | 16:29747291 | Intergenic | T/T | 2.44E-15 | 0 | 0 | 40 | 99 | 0/0 | NC | 0/0 | missing<br>GT | match | missing<br>GT |
| 163383 | TruSeqV2    | 16:29747291 | Intergenic | G/G | 3.30E-13 | 0 | 0 | 26 | 53 | 1/1 | NC | 1/1 | missing<br>GT | match | missing<br>GT |
| 198564 | Agilent38MB | 16:29747291 | Intergenic | G/T | 6.33E-12 | 0 | 0 | 38 | 99 | 0/1 | NC | 0/1 | missing<br>GT | match | missing<br>GT |
| 132306 | Agilent38MB | 16:30212544 | missense   | C/C | 4.44E-16 | 0 | 0 | 16 | 48 | 0/0 | NC | 0/0 | missing<br>GT | match | missing<br>GT |
| 163383 | TruSeqV2    | 16:30212544 | missense   | C/C | 2.22E-16 | 0 | 0 | 5  | 14 | 0/0 | NC | 0/0 | missing<br>GT | match | missing<br>GT |
| 198564 | Agilent38MB | 16:30212544 | missense   | C/C | 4.44E-16 | 0 | 0 | 17 | 51 | 0/0 | NC | 0/0 | missing<br>GT | match | missing<br>GT |
| 108971 | TruSeqV2    | 16:31103545 | intronic   | T/T | 3.55E-15 | 0 | 0 | 34 | 93 | 0/0 | NC | 0/0 | missing<br>GT | match | missing<br>GT |
| 115239 | TruSeqV2    | 16:31103545 | intronic   | T/T | 3.33E-15 | 0 | 0 | 23 | 69 | 0/0 | NC | 0/0 | missing<br>GT | match | missing<br>GT |
| 132306 | Agilent38MB | 16:31103545 | intronic   | T/T | 4.44E-16 | 0 | 0 | 23 | 69 | 0/0 | NC | 0/0 | missing<br>GT | match | missing<br>GT |
| 163383 | TruSeqV2    | 16:31103545 | intronic   | T/T | 1.11E-15 | 0 | 0 | 18 | 51 | 0/0 | NC | 0/0 | missing<br>GT | match | missing<br>GT |
| 198564 | Agilent38MB | 16:31103545 | intronic   | T/T | 2.89E-14 | 0 | 0 | 26 | 69 | 0/0 | NC | 0/0 | missing<br>GT | match | missing<br>GT |
| 108971 | TruSeqV2    | 16:31103796 | intronic   | G/A | 8.83E-12 | 0 | 0 | 29 | 99 | 0/1 | NC | 0/1 | missing<br>GT | match | missing<br>GT |

|        |             |             |          |     |          |   |   |    |    |     |    |     |               |       |               |
|--------|-------------|-------------|----------|-----|----------|---|---|----|----|-----|----|-----|---------------|-------|---------------|
| 115239 | TruSeqV2    | 16:31103796 | intronic | G/A | 1.10E-13 | 0 | 0 | 27 | 99 | 0/1 | NC | 0/1 | missing<br>GT | match | missing<br>GT |
| 132306 | Agilent38MB | 16:31103796 | intronic | G/A | 8.88E-15 | 0 | 0 | 33 | 99 | 0/1 | NC | 0/1 | missing<br>GT | match | missing<br>GT |
| 163383 | TruSeqV2    | 16:31103796 | intronic | G/A | 8.22E-15 | 0 | 0 | 28 | 99 | 0/1 | NC | 0/1 | missing<br>GT | match | missing<br>GT |
| 115239 | TruSeqV2    | 16:31104402 | intronic | C/C | 6.66E-16 | 0 | 0 | 24 | 66 | 0/0 | NC | 0/0 | missing<br>GT | match | missing<br>GT |
| 132306 | Agilent38MB | 16:31104402 | intronic | C/C | 2.22E-16 | 0 | 0 | 29 | 66 | 0/0 | NC | 0/0 | missing<br>GT | match | missing<br>GT |
| 163383 | TruSeqV2    | 16:31104402 | intronic | C/C | 2.22E-16 | 0 | 0 | 29 | 78 | 0/0 | NC | 0/0 | missing<br>GT | match | missing<br>GT |
| 108971 | TruSeqV2    | 16:31104447 | intronic | A/A | 4.44E-16 | 0 | 0 | 24 | 60 | 0/0 | NC | 0/0 | missing<br>GT | match | missing<br>GT |
| 115239 | TruSeqV2    | 16:31104447 | intronic | A/A | 6.66E-16 | 0 | 0 | 22 | 54 | 0/0 | NC | 0/0 | missing<br>GT | match | missing<br>GT |
| 163383 | TruSeqV2    | 16:31104447 | intronic | A/A | 2.22E-16 | 0 | 0 | 28 | 66 | 0/0 | NC | 0/0 | missing<br>GT | match | missing<br>GT |
| 115239 | TruSeqV2    | 16:31104509 | intronic | G/C | 1.78E-15 | 0 | 0 | 14 | 99 | 0/1 | NC | 0/1 | missing<br>GT | match | missing<br>GT |
| 163383 | TruSeqV2    | 16:31104509 | intronic | G/C | 8.88E-16 | 0 | 0 | 28 | 99 | 0/1 | NC | 0/1 | missing<br>GT | match | missing<br>GT |
| 108971 | TruSeqV2    | 16:31105171 | intronic | G/G | 4.25E-12 | 0 | 0 | 14 | 1  | 0/0 | NC | 0/0 | missing<br>GT | match | missing<br>GT |
| 115239 | TruSeqV2    | 16:31105171 | intronic | G/G | 7.78E-13 | 0 | 0 | 3  | 6  | 0/0 | NC | 0/0 | missing<br>GT | match | missing<br>GT |
| 132306 | Agilent38MB | 16:31105171 | intronic | G/G | 1.55E-15 | 0 | 0 | 7  | 5  | 0/0 | NC | 0/0 | missing<br>GT | match | missing<br>GT |
| 163383 | TruSeqV2    | 16:31105171 | intronic | G/G | 7.60E-12 | 0 | 0 | 10 | 27 | 0/0 | NC | 0/0 | missing<br>GT | match | missing<br>GT |
| 198564 | Agilent38MB | 16:31105171 | intronic | G/G | 5.41E-10 | 0 | 0 | 7  | 21 | 0/0 | NC | 0/0 | missing<br>GT | match | missing<br>GT |
| 108971 | TruSeqV2    | 16:31105353 | intronic | G/G | 1.11E-15 | 0 | 0 | 24 | 66 | 0/0 | NC | 0/0 | missing<br>GT | match | missing<br>GT |
| 115239 | TruSeqV2    | 16:31105353 | intronic | G/G | 1.55E-15 | 0 | 0 | 20 | 57 | 0/0 | NC | 0/0 | missing<br>GT | match | missing<br>GT |
| 132306 | Agilent38MB | 16:31105353 | intronic | G/G | 8.88E-16 | 0 | 0 | 35 | 96 | 0/0 | NC | 0/0 | missing<br>GT | match | missing<br>GT |

|        |             |             |          |     |          |   |   |    |    |     |    |     |               |       |               |
|--------|-------------|-------------|----------|-----|----------|---|---|----|----|-----|----|-----|---------------|-------|---------------|
| 163383 | TruSeqV2    | 16:31105353 | intronic | G/A | 5.02E-14 | 0 | 0 | 30 | 99 | 0/1 | NC | 0/1 | missing<br>GT | match | missing<br>GT |
| 108971 | TruSeqV2    | 16:31105392 | intronic | G/G | 4.44E-16 | 0 | 0 | 33 | 87 | 0/0 | NC | 0/0 | missing<br>GT | match | missing<br>GT |
| 115239 | TruSeqV2    | 16:31105392 | intronic | G/G | 2.22E-16 | 0 | 0 | 18 | 27 | 0/0 | NC | 0/0 | missing<br>GT | match | missing<br>GT |
| 132306 | Agilent38MB | 16:31105392 | intronic | G/G | 2.22E-16 | 0 | 0 | 28 | 78 | 0/0 | NC | 0/0 | missing<br>GT | match | missing<br>GT |
| 163383 | TruSeqV2    | 16:31105392 | intronic | G/G | 2.22E-16 | 0 | 0 | 23 | 60 | 0/0 | NC | 0/0 | missing<br>GT | match | missing<br>GT |
| 108971 | TruSeqV2    | 16:31105554 | intronic | A/A | 1.13E-14 | 0 | 0 | 25 | 72 | 0/0 | NC | 0/0 | missing<br>GT | match | missing<br>GT |
| 163383 | TruSeqV2    | 16:31105554 | intronic | C/A | 6.95E-14 | 0 | 0 | 16 | 99 | 0/1 | NC | 0/1 | missing<br>GT | match | missing<br>GT |
| 198564 | Agilent38MB | 16:31105554 | intronic | C/A | 1.22E-14 | 0 | 0 | 34 | 99 | 0/1 | NC | 0/1 | missing<br>GT | match | missing<br>GT |
| 108971 | TruSeqV2    | 16:31107689 | promoter | T/C | 8.88E-16 | 0 | 0 | 33 | 99 | 0/1 | NC | 0/1 | missing<br>GT | match | missing<br>GT |
| 115239 | TruSeqV2    | 16:31107689 | promoter | T/C | 4.44E-16 | 0 | 0 | 26 | 99 | 0/1 | NC | 0/1 | missing<br>GT | match | missing<br>GT |
| 132306 | Agilent38MB | 16:31107689 | promoter | T/C | 1.11E-15 | 0 | 0 | 27 | 99 | 0/1 | NC | 0/1 | missing<br>GT | match | missing<br>GT |
| 163383 | TruSeqV2    | 16:31107689 | promoter | T/C | 6.66E-16 | 0 | 0 | 44 | 99 | 0/1 | NC | 0/1 | missing<br>GT | match | missing<br>GT |
| 198564 | Agilent38MB | 16:31107689 | promoter | T/T | 1.84E-14 | 0 | 0 | 24 | 72 | 1/1 | NC | 1/1 | missing<br>GT | match | missing<br>GT |
| 108971 | TruSeqV2    | 16:31107927 | promoter | T/T | 1.33E-15 | 0 | 0 | 62 | 99 | 0/0 | NC | 0/0 | missing<br>GT | match | missing<br>GT |
| 115239 | TruSeqV2    | 16:31107927 | promoter | T/T | 1.11E-15 | 0 | 0 | 34 | 58 | 0/0 | NC | 0/0 | missing<br>GT | match | missing<br>GT |
| 132306 | Agilent38MB | 16:31107927 | promoter | T/T | 1.78E-15 | 0 | 0 | 32 | 78 | 0/0 | NC | 0/0 | missing<br>GT | match | missing<br>GT |
| 163383 | TruSeqV2    | 16:31107927 | promoter | T/T | 8.88E-16 | 0 | 0 | 52 | 99 | 0/0 | NC | 0/0 | missing<br>GT | match | missing<br>GT |
| 198564 | Agilent38MB | 16:31107927 | promoter | T/T | 8.88E-16 | 0 | 0 | 59 | 99 | 0/0 | NC | 0/0 | missing<br>GT | match | missing<br>GT |
| 108971 | TruSeqV2    | 16:31111064 | promoter | A/A | 2.95E-07 | 0 | 0 | 27 | 72 | 0/0 | NC | 0/0 | missing<br>GT | match | missing<br>GT |



|        |             |             |          |     |          |   |   |    |    |     |    |     |               |       |               |
|--------|-------------|-------------|----------|-----|----------|---|---|----|----|-----|----|-----|---------------|-------|---------------|
| 115239 | TruSeqV2    | 16:31111064 | promoter | A/A | 1.86E-06 | 0 | 0 | 27 | 62 | 0/0 | NC | 0/0 | missing<br>GT | match | missing<br>GT |
| 132306 | Agilent38MB | 16:31111064 | promoter | A/A | 5.58E-07 | 0 | 0 | 26 | 60 | 0/0 | NC | 0/0 | missing<br>GT | match | missing<br>GT |
| 163383 | TruSeqV2    | 16:31111064 | promoter | A/A | 8.04E-06 | 0 | 0 | 37 | 58 | 0/0 | NC | 0/0 | missing<br>GT | match | missing<br>GT |
| 198564 | Agilent38MB | 16:31111064 | promoter | A/A | 9.25E-08 | 0 | 0 | 42 | 93 | 0/0 | NC | 0/0 | missing<br>GT | match | missing<br>GT |
| 108971 | TruSeqV2    | 16:66970561 | intronic | A/A | 2.00E-15 | 0 | 0 | 52 | 99 | 0/0 | NC | 0/0 | missing<br>GT | match | missing<br>GT |
| 115239 | TruSeqV2    | 16:66970561 | intronic | A/A | 2.00E-15 | 0 | 0 | 30 | 81 | 0/0 | NC | 0/0 | missing<br>GT | match | missing<br>GT |
| 132306 | Agilent38MB | 16:66970561 | intronic | A/T | 1.04E-13 | 0 | 0 | 33 | 99 | 0/1 | NC | 0/1 | missing<br>GT | match | missing<br>GT |
| 163383 | TruSeqV2    | 16:66970561 | intronic | A/A | 2.66E-15 | 0 | 0 | 41 | 99 | 0/0 | NC | 0/0 | missing<br>GT | match | missing<br>GT |
| 108971 | TruSeqV2    | 16:66970975 | intronic | A/A | 6.22E-15 | 0 | 0 | 29 | 81 | 0/0 | NC | 0/0 | missing<br>GT | match | missing<br>GT |
| 115239 | TruSeqV2    | 16:66970975 | intronic | A/G | 2.00E-15 | 0 | 0 | 16 | 99 | 0/1 | NC | 0/1 | missing<br>GT | match | missing<br>GT |
| 132306 | Agilent38MB | 16:66970975 | intronic | A/G | 1.11E-15 | 0 | 0 | 19 | 99 | 0/1 | NC | 0/1 | missing<br>GT | match | missing<br>GT |
| 163383 | TruSeqV2    | 16:66970975 | intronic | A/A | 1.55E-15 | 0 | 0 | 33 | 90 | 0/0 | NC | 0/0 | missing<br>GT | match | missing<br>GT |
| 198564 | Agilent38MB | 16:66970975 | intronic | A/A | 8.44E-15 | 0 | 0 | 26 | 69 | 0/0 | NC | 0/0 | missing<br>GT | match | missing<br>GT |
| 108971 | TruSeqV2    | 16:66971257 | intronic | G/G | 4.44E-16 | 0 | 0 | 44 | 99 | 0/0 | NC | 0/0 | missing<br>GT | match | missing<br>GT |
| 115239 | TruSeqV2    | 16:66971257 | intronic | G/G | 4.44E-16 | 0 | 0 | 35 | 99 | 0/0 | NC | 0/0 | missing<br>GT | match | missing<br>GT |
| 132306 | Agilent38MB | 16:66971257 | intronic | A/G | 1.04E-14 | 0 | 0 | 27 | 99 | 0/1 | NC | 0/1 | missing<br>GT | match | missing<br>GT |
| 163383 | TruSeqV2    | 16:66971257 | intronic | G/G | 4.44E-16 | 0 | 0 | 29 | 81 | 0/0 | NC | 0/0 | missing<br>GT | match | missing<br>GT |
| 198564 | Agilent38MB | 16:66971257 | intronic | G/G | 4.44E-16 | 0 | 0 | 44 | 99 | 0/0 | NC | 0/0 | missing<br>GT | match | missing<br>GT |
| 132306 | Agilent38MB | 16:69743760 | 3'UTR    | G/A | 4.44E-16 | 0 | 0 | 45 | 99 | 0/1 | NC | 0/1 | missing<br>GT | match | missing<br>GT |

|        |             |             |          |     |          |   |   |    |    |     |    |     |               |       |               |
|--------|-------------|-------------|----------|-----|----------|---|---|----|----|-----|----|-----|---------------|-------|---------------|
| 198564 | Agilent38MB | 16:69743760 | 3'UTR    | G/G | 2.22E-16 | 0 | 0 | 45 | 99 | 1/1 | NC | 1/1 | missing<br>GT | match | missing<br>GT |
| 198564 | Agilent38MB | 16:71560153 | 5'UTR    | T/T | 8.16E-10 | 0 | 0 | 41 | 99 | 0/0 | NC | 0/0 | missing<br>GT | match | missing<br>GT |
| 132306 | Agilent38MB | 16:75564668 | 5'UTR    | C/C | 6.66E-16 | 0 | 0 | 23 | 66 | 0/0 | NC | 0/0 | missing<br>GT | match | missing<br>GT |
| 132306 | Agilent38MB | 16:75565284 | 5'UTR    | G/G | 3.11E-15 | 0 | 0 | 46 | 99 | 0/0 | NC | 0/0 | missing<br>GT | match | missing<br>GT |
| 198564 | Agilent38MB | 16:75565284 | 5'UTR    | G/G | 3.69E-14 | 0 | 0 | 46 | 99 | 0/0 | NC | 0/0 | missing<br>GT | match | missing<br>GT |
| 198564 | Agilent38MB | 16:75565420 | 5'UTR    | A/A | 4.22E-15 | 0 | 0 | 37 | 96 | 0/0 | NC | 0/0 | missing<br>GT | match | missing<br>GT |
| 132306 | Agilent38MB | 16:87866136 | 3'UTR    | G/G | 8.88E-16 | 0 | 0 | 27 | 75 | 0/0 | NC | 0/0 | missing<br>GT | match | missing<br>GT |
| 198564 | Agilent38MB | 16:87866136 | 3'UTR    | G/G | 4.00E-15 | 0 | 0 | 38 | 99 | 0/0 | NC | 0/0 | missing<br>GT | match | missing<br>GT |
| 132306 | Agilent38MB | 16:87866138 | 3'UTR    | G/C | 6.44E-15 | 0 | 0 | 23 | 99 | 0/1 | NC | 0/1 | missing<br>GT | match | missing<br>GT |
| 198564 | Agilent38MB | 16:87866138 | 3'UTR    | G/C | 7.77E-15 | 0 | 0 | 34 | 99 | 0/1 | NC | 0/1 | missing<br>GT | match | missing<br>GT |
| 132306 | Agilent38MB | 16:89623779 | 3'UTR    | T/T | 2.22E-16 | 0 | 0 | 29 | 78 | 0/0 | NC | 0/0 | missing<br>GT | match | missing<br>GT |
| 198564 | Agilent38MB | 16:89623779 | 3'UTR    | T/T | 2.20E-12 | 0 | 0 | 48 | 99 | 0/0 | NC | 0/0 | missing<br>GT | match | missing<br>GT |
| 132306 | Agilent38MB | 16:89624157 | 3'UTR    | G/G | 2.22E-16 | 0 | 0 | 32 | 93 | 0/0 | NC | 0/0 | missing<br>GT | match | missing<br>GT |
| 108971 | TruSeqV2    | 17:37824754 | missense | A/A | 1.23E-12 | 0 | 0 | 1  | 3  | 0/0 | NC | 0/0 | missing<br>GT | match | missing<br>GT |
| 115239 | TruSeqV2    | 17:37824754 | missense | A/A | 3.58E-11 | 0 | 0 | 6  | 18 | 0/0 | NC | 0/0 | missing<br>GT | match | missing<br>GT |
| 198564 | Agilent38MB | 18:9517043  | missense | A/A | 4.44E-16 | 0 | 0 | 56 | 99 | 0/0 | NC | 0/0 | missing<br>GT | match | missing<br>GT |
| 132306 | Agilent38MB | 18:9536249  | 3'UTR    | C/T | 5.11E-15 | 0 | 0 | 45 | 99 | 0/1 | NC | 0/1 | missing<br>GT | match | missing<br>GT |
| 198564 | Agilent38MB | 18:9536249  | 3'UTR    | T/T | 4.66E-15 | 0 | 0 | 56 | 99 | 1/1 | NC | 1/1 | missing<br>GT | match | missing<br>GT |
| 198564 | Agilent38MB | 18:9536691  | 3'UTR    | G/G | 5.33E-15 | 0 | 0 | 40 | 99 | 0/0 | NC | 0/0 | missing<br>GT | match | missing<br>GT |

|        |             |             |          |     |          |   |   |    |    |     |    |     |               |       |               |
|--------|-------------|-------------|----------|-----|----------|---|---|----|----|-----|----|-----|---------------|-------|---------------|
| 132306 | Agilent38MB | 18:9537835  | 3'UTR    | G/G | 1.33E-15 | 0 | 0 | 26 | 60 | 0/0 | NC | 0/0 | missing<br>GT | match | missing<br>GT |
| 132306 | Agilent38MB | 19:15726147 | intronic | G/G | 4.44E-16 | 0 | 0 | 25 | 75 | 1/1 | NC | 1/1 | missing<br>GT | match | missing<br>GT |
| 198564 | Agilent38MB | 19:15726147 | intronic | G/G | 2.44E-15 | 0 | 0 | 41 | 99 | 1/1 | NC | 1/1 | missing<br>GT | match | missing<br>GT |
| 132306 | Agilent38MB | 19:34175603 | 5'UTR    | C/C | 1.33E-15 | 0 | 0 | 22 | 54 | 0/0 | NC | 0/0 | missing<br>GT | match | missing<br>GT |
| 198564 | Agilent38MB | 19:34175603 | 5'UTR    | C/C | 2.22E-15 | 0 | 0 | 39 | 75 | 0/0 | NC | 0/0 | missing<br>GT | match | missing<br>GT |
| 198564 | Agilent38MB | 19:34176058 | 5'UTR    | T/T | 2.00E-15 | 0 | 0 | 29 | 78 | 0/0 | NC | 0/0 | missing<br>GT | match | missing<br>GT |
| 132306 | Agilent38MB | 19:34264354 | 3'UTR    | G/G | 1.55E-15 | 0 | 0 | 35 | 93 | 0/0 | NC | 0/0 | missing<br>GT | match | missing<br>GT |
| 198564 | Agilent38MB | 19:34264354 | 3'UTR    | A/G | 1.51E-14 | 0 | 0 | 41 | 99 | 0/1 | NC | 0/1 | missing<br>GT | match | missing<br>GT |
| 163383 | TruSeqV2    | 19:41357344 | promoter | T/C | 4.29E-14 | 0 | 0 | 43 | 99 | 0/1 | NC | 0/1 | missing<br>GT | match | missing<br>GT |
| 132306 | Agilent38MB | 19:41381510 | 3'UTR    | T/T | 4.44E-16 | 0 | 0 | 21 | 51 | 0/0 | NC | 0/0 | missing<br>GT | match | missing<br>GT |
| 108971 | TruSeqV2    | 19:41511803 | intronic | C/C | 6.66E-16 | 0 | 0 | 36 | 73 | 0/0 | NC | 0/0 | missing<br>GT | match | missing<br>GT |
| 115239 | TruSeqV2    | 19:41511803 | intronic | C/G | 4.44E-16 | 0 | 0 | 34 | 99 | 0/1 | NC | 0/1 | missing<br>GT | match | missing<br>GT |
| 132306 | Agilent38MB | 19:41511803 | intronic | C/C | 6.66E-16 | 0 | 0 | 24 | 60 | 0/0 | NC | 0/0 | missing<br>GT | match | missing<br>GT |
| 163383 | TruSeqV2    | 19:41511803 | intronic | C/C | 8.88E-16 | 0 | 0 | 37 | 99 | 0/0 | NC | 0/0 | missing<br>GT | match | missing<br>GT |
| 115239 | TruSeqV2    | 19:41515483 | intronic | A/G | 9.96E-10 | 0 | 0 | 26 | 99 | 0/1 | NC | 0/1 | missing<br>GT | match | missing<br>GT |
| 108971 | TruSeqV2    | 19:41596742 | intronic | C/C | 8.88E-16 | 0 | 0 | 41 | 96 | 0/0 | NC | 0/0 | missing<br>GT | match | missing<br>GT |
| 198564 | Agilent38MB | 19:48374551 | 3'UTR    | G/G | 3.52E-08 | 0 | 0 | 28 | 83 | 1/1 | NC | 1/1 | missing<br>GT | match | missing<br>GT |
| 108971 | TruSeqV2    | 19:49079246 | synon    | C/T | 1.33E-15 | 0 | 0 | 33 | 99 | 0/1 | NC | 0/1 | missing<br>GT | match | missing<br>GT |
| 115239 | TruSeqV2    | 19:49079246 | synon    | C/C | 4.00E-15 | 0 | 0 | 21 | 54 | 0/0 | NC | 0/0 | missing<br>GT | match | missing<br>GT |

|        |             |             |          |     |          |   |   |    |    |     |    |     |               |       |               |
|--------|-------------|-------------|----------|-----|----------|---|---|----|----|-----|----|-----|---------------|-------|---------------|
| 163383 | TruSeqV2    | 19:49079246 | synon    | C/T | 1.78E-15 | 0 | 0 | 24 | 99 | 0/1 | NC | 0/1 | missing<br>GT | match | missing<br>GT |
| 108971 | TruSeqV2    | 19:49079278 | missense | T/T | 4.44E-16 | 0 | 0 | 33 | 87 | 0/0 | NC | 0/0 | missing<br>GT | match | missing<br>GT |
| 115239 | TruSeqV2    | 19:49079278 | missense | T/T | 4.44E-16 | 0 | 0 | 24 | 66 | 0/0 | NC | 0/0 | missing<br>GT | match | missing<br>GT |
| 163383 | TruSeqV2    | 19:49079278 | missense | T/T | 6.66E-16 | 0 | 0 | 26 | 75 | 0/0 | NC | 0/0 | missing<br>GT | match | missing<br>GT |
| 132306 | Agilent38MB | 2:101031561 | 5'UTR    | G/G | 1.11E-15 | 0 | 0 | 31 | 78 | 0/0 | NC | 0/0 | missing<br>GT | match | missing<br>GT |
| 132306 | Agilent38MB | 2:108925077 | 3'UTR    | A/A | 4.44E-16 | 0 | 0 | 41 | 99 | 0/0 | NC | 0/0 | missing<br>GT | match | missing<br>GT |
| 132306 | Agilent38MB | 2:108925184 | 3'UTR    | A/A | 8.88E-16 | 0 | 0 | 43 | 99 | 0/0 | NC | 0/0 | missing<br>GT | match | missing<br>GT |
| 198564 | Agilent38MB | 2:108925184 | 3'UTR    | A/A | 4.44E-16 | 0 | 0 | 39 | 99 | 0/0 | NC | 0/0 | missing<br>GT | match | missing<br>GT |
| 132306 | Agilent38MB | 2:108925220 | 3'UTR    | A/G | 1.91E-14 | 0 | 0 | 38 | 99 | 0/1 | NC | 0/1 | missing<br>GT | match | missing<br>GT |
| 198564 | Agilent38MB | 2:108925220 | 3'UTR    | A/A | 1.64E-14 | 0 | 0 | 43 | 99 | 0/0 | NC | 0/0 | missing<br>GT | match | missing<br>GT |
| 198564 | Agilent38MB | 2:108925749 | 3'UTR    | G/G | 6.44E-15 | 0 | 0 | 43 | 99 | 0/0 | NC | 0/0 | missing<br>GT | match | missing<br>GT |
| 198564 | Agilent38MB | 2:108925752 | 3'UTR    | G/G | 6.66E-16 | 0 | 0 | 46 | 99 | 0/0 | NC | 0/0 | missing<br>GT | match | missing<br>GT |
| 108971 | TruSeqV2    | 2:108993719 | promoter | G/G | 1.55E-15 | 0 | 0 | 37 | 93 | 0/0 | NC | 0/0 | missing<br>GT | match | missing<br>GT |
| 132306 | Agilent38MB | 2:108993719 | promoter | G/G | 3.77E-15 | 0 | 0 | 28 | 75 | 0/0 | NC | 0/0 | missing<br>GT | match | missing<br>GT |
| 163383 | TruSeqV2    | 2:108993719 | promoter | G/G | 5.33E-15 | 0 | 0 | 40 | 99 | 0/0 | NC | 0/0 | missing<br>GT | match | missing<br>GT |
| 198564 | Agilent38MB | 2:108993719 | promoter | G/G | 4.66E-15 | 0 | 0 | 35 | 84 | 0/0 | NC | 0/0 | missing<br>GT | match | missing<br>GT |
| 132306 | Agilent38MB | 2:108994305 | promoter | A/A | 7.99E-15 | 0 | 0 | 33 | 72 | 0/0 | NC | 0/0 | missing<br>GT | match | missing<br>GT |
| 198564 | Agilent38MB | 2:108994305 | promoter | A/A | 4.44E-16 | 0 | 0 | 48 | 96 | 0/0 | NC | 0/0 | missing<br>GT | match | missing<br>GT |
| 132306 | Agilent38MB | 2:108994311 | promoter | C/C | 4.66E-15 | 0 | 0 | 26 | 69 | 0/0 | NC | 0/0 | missing<br>GT | match | missing<br>GT |

|        |             |             |          |     |          |   |   |    |    |     |    |     |               |       |               |
|--------|-------------|-------------|----------|-----|----------|---|---|----|----|-----|----|-----|---------------|-------|---------------|
| 198564 | Agilent38MB | 2:108994311 | promoter | C/C | 3.25E-13 | 0 | 0 | 43 | 99 | 0/0 | NC | 0/0 | missing<br>GT | match | missing<br>GT |
| 108971 | TruSeqV2    | 2:109001295 | intronic | A/A | 2.22E-16 | 0 | 0 | 42 | 97 | 0/0 | NC | 0/0 | missing<br>GT | match | missing<br>GT |
| 115239 | TruSeqV2    | 2:109001295 | intronic | A/A | 4.44E-16 | 0 | 0 | 36 | 99 | 0/0 | NC | 0/0 | missing<br>GT | match | missing<br>GT |
| 132306 | Agilent38MB | 2:109001295 | intronic | A/A | 2.22E-16 | 0 | 0 | 24 | 63 | 0/0 | NC | 0/0 | missing<br>GT | match | missing<br>GT |
| 163383 | TruSeqV2    | 2:109001295 | intronic | A/A | 4.44E-16 | 0 | 0 | 41 | 99 | 0/0 | NC | 0/0 | missing<br>GT | match | missing<br>GT |
| 198564 | Agilent38MB | 2:109001295 | intronic | A/A | 2.22E-16 | 0 | 0 | 44 | 99 | 0/0 | NC | 0/0 | missing<br>GT | match | missing<br>GT |
| 132306 | Agilent38MB | 2:138772335 | 3'UTR    | G/G | 1.78E-15 | 0 | 0 | 38 | 99 | 0/0 | NC | 0/0 | missing<br>GT | match | missing<br>GT |
| 198564 | Agilent38MB | 2:138772335 | 3'UTR    | G/G | 3.77E-15 | 0 | 0 | 52 | 99 | 0/0 | NC | 0/0 | missing<br>GT | match | missing<br>GT |
| 132306 | Agilent38MB | 2:138772694 | 3'UTR    | C/C | 1.27E-13 | 0 | 0 | 32 | 81 | 0/0 | NC | 0/0 | missing<br>GT | match | missing<br>GT |
| 132306 | Agilent38MB | 2:138773229 | 3'UTR    | G/G | 1.55E-15 | 0 | 0 | 34 | 81 | 0/0 | NC | 0/0 | missing<br>GT | match | missing<br>GT |
| 198564 | Agilent38MB | 2:138773229 | 3'UTR    | A/G | 3.77E-15 | 0 | 0 | 53 | 99 | 0/1 | NC | 0/1 | missing<br>GT | match | missing<br>GT |
| 132306 | Agilent38MB | 2:169779712 | 3'UTR    | T/C | 2.44E-15 | 0 | 0 | 37 | 99 | 0/1 | NC | 0/1 | missing<br>GT | match | missing<br>GT |
| 198564 | Agilent38MB | 2:169779712 | 3'UTR    | T/C | 6.66E-16 | 0 | 0 | 28 | 99 | 0/1 | NC | 0/1 | missing<br>GT | match | missing<br>GT |
| 132306 | Agilent38MB | 2:169779764 | 3'UTR    | T/C | 8.88E-16 | 0 | 0 | 29 | 99 | 0/1 | NC | 0/1 | missing<br>GT | match | missing<br>GT |
| 198564 | Agilent38MB | 2:169779764 | 3'UTR    | T/C | 3.11E-15 | 0 | 0 | 30 | 99 | 0/1 | NC | 0/1 | missing<br>GT | match | missing<br>GT |
| 132306 | Agilent38MB | 2:169779851 | 3'UTR    | A/A | 4.44E-16 | 0 | 0 | 29 | 75 | 0/0 | NC | 0/0 | missing<br>GT | match | missing<br>GT |
| 132306 | Agilent38MB | 2:169779896 | 3'UTR    | T/C | 2.00E-15 | 0 | 0 | 32 | 99 | 0/1 | NC | 0/1 | missing<br>GT | match | missing<br>GT |
| 132306 | Agilent38MB | 2:169780295 | missense | C/C | 2.22E-16 | 0 | 0 | 38 | 93 | 0/0 | NC | 0/0 | missing<br>GT | match | missing<br>GT |
| 132306 | Agilent38MB | 2:169783728 | missense | C/C | 2.22E-16 | 0 | 0 | 26 | 56 | 0/0 | NC | 0/0 | missing<br>GT | match | missing<br>GT |

|        |             |             |          |     |          |   |   |    |    |     |    |     |               |       |               |
|--------|-------------|-------------|----------|-----|----------|---|---|----|----|-----|----|-----|---------------|-------|---------------|
| 132306 | Agilent38MB | 2:169783827 | missense | G/G | 8.88E-16 | 0 | 0 | 28 | 72 | 0/0 | NC | 0/0 | missing<br>GT | match | missing<br>GT |
| 132306 | Agilent38MB | 2:169787318 | stop     | G/G | 2.22E-16 | 0 | 0 | 40 | 99 | 0/0 | NC | 0/0 | missing<br>GT | match | missing<br>GT |
| 198564 | Agilent38MB | 2:169787318 | stop     | G/G | 1.11E-15 | 0 | 0 | 35 | 93 | 0/0 | NC | 0/0 | missing<br>GT | match | missing<br>GT |
| 132306 | Agilent38MB | 2:169788931 | stop     | G/G | 2.22E-16 | 0 | 0 | 36 | 93 | 0/0 | NC | 0/0 | missing<br>GT | match | missing<br>GT |
| 198564 | Agilent38MB | 2:169788931 | stop     | G/G | 2.22E-16 | 0 | 0 | 51 | 99 | 0/0 | NC | 0/0 | missing<br>GT | match | missing<br>GT |
| 198564 | Agilent38MB | 2:169789016 | synon    | T/C | 7.27E-12 | 0 | 0 | 39 | 99 | 0/1 | NC | 0/1 | missing<br>GT | match | missing<br>GT |
| 198564 | Agilent38MB | 2:169791806 | missense | C/C | 1.33E-15 | 0 | 0 | 54 | 99 | 0/0 | NC | 0/0 | missing<br>GT | match | missing<br>GT |
| 132306 | Agilent38MB | 2:169801403 | synon    | T/T | 6.66E-16 | 0 | 0 | 27 | 72 | 0/0 | NC | 0/0 | missing<br>GT | match | missing<br>GT |
| 198564 | Agilent38MB | 2:169801403 | synon    | T/T | 8.88E-16 | 0 | 0 | 57 | 99 | 0/0 | NC | 0/0 | missing<br>GT | match | missing<br>GT |
| 132306 | Agilent38MB | 2:169826641 | stop     | G/G | 2.22E-16 | 0 | 0 | 22 | 57 | 0/0 | NC | 0/0 | missing<br>GT | match | missing<br>GT |
| 198564 | Agilent38MB | 2:169828550 | missense | T/T | 1.11E-15 | 0 | 0 | 41 | 99 | 0/0 | NC | 0/0 | missing<br>GT | match | missing<br>GT |
| 132306 | Agilent38MB | 2:169830328 | missense | A/A | 1.91E-13 | 0 | 0 | 32 | 81 | 0/0 | NC | 0/0 | missing<br>GT | match | missing<br>GT |
| 198564 | Agilent38MB | 2:169830328 | missense | G/A | 4.00E-14 | 0 | 0 | 45 | 99 | 0/1 | NC | 0/1 | missing<br>GT | match | missing<br>GT |
| 132306 | Agilent38MB | 2:169842746 | synon    | T/T | 6.66E-16 | 0 | 0 | 31 | 75 | 0/0 | NC | 0/0 | missing<br>GT | match | missing<br>GT |
| 198564 | Agilent38MB | 2:169842746 | synon    | T/T | 1.55E-15 | 0 | 0 | 36 | 99 | 0/0 | NC | 0/0 | missing<br>GT | match | missing<br>GT |
| 132306 | Agilent38MB | 2:169847323 | missense | C/C | 4.44E-16 | 0 | 0 | 45 | 99 | 0/0 | NC | 0/0 | missing<br>GT | match | missing<br>GT |
| 198564 | Agilent38MB | 2:169847323 | missense | C/C | 8.88E-16 | 0 | 0 | 34 | 84 | 0/0 | NC | 0/0 | missing<br>GT | match | missing<br>GT |
| 132306 | Agilent38MB | 2:169847412 | synon    | A/A | 2.44E-15 | 0 | 0 | 31 | 81 | 0/0 | NC | 0/0 | missing<br>GT | match | missing<br>GT |
| 198564 | Agilent38MB | 2:169847412 | synon    | A/A | 6.66E-16 | 0 | 0 | 57 | 99 | 0/0 | NC | 0/0 | missing<br>GT | match | missing<br>GT |

|        |             |             |          |         |          |   |   |    |    |     |    |     |               |       |               |
|--------|-------------|-------------|----------|---------|----------|---|---|----|----|-----|----|-----|---------------|-------|---------------|
| 132306 | Agilent38MB | 2:169850291 | missense | C/C     | 6.66E-16 | 0 | 0 | 36 | 99 | 0/0 | NC | 0/0 | missing<br>GT | match | missing<br>GT |
| 198564 | Agilent38MB | 2:169850291 | missense | C/C     | 6.66E-15 | 0 | 0 | 43 | 99 | 0/0 | NC | 0/0 | missing<br>GT | match | missing<br>GT |
| 132306 | Agilent38MB | 2:169869901 | synon    | A/A     | 6.66E-16 | 0 | 0 | 31 | 81 | 0/0 | NC | 0/0 | missing<br>GT | match | missing<br>GT |
| 198564 | Agilent38MB | 2:169869901 | synon    | A/A     | 1.33E-15 | 0 | 0 | 38 | 99 | 0/0 | NC | 0/0 | missing<br>GT | match | missing<br>GT |
| 132306 | Agilent38MB | 2:169870855 | synon    | A/A     | 4.44E-16 | 0 | 0 | 45 | 99 | 0/0 | NC | 0/0 | missing<br>GT | match | missing<br>GT |
| 198564 | Agilent38MB | 2:169870855 | synon    | A/A     | 3.33E-15 | 0 | 0 | 51 | 99 | 0/0 | NC | 0/0 | missing<br>GT | match | missing<br>GT |
| 132306 | Agilent38MB | 2:169870882 | intronic | A/A     | 1.33E-15 | 0 | 0 | 48 | 99 | 0/0 | NC | 0/0 | missing<br>GT | match | missing<br>GT |
| 198564 | Agilent38MB | 2:169870882 | intronic | A/A     | 2.22E-15 | 0 | 0 | 54 | 99 | 0/0 | NC | 0/0 | missing<br>GT | match | missing<br>GT |
| 108971 | TruSeqV2    | 2:169875245 | intronic | G/G     | 4.44E-16 | 0 | 0 | 29 | 78 | 0/0 | NC | 0/0 | missing<br>GT | match | missing<br>GT |
| 115239 | TruSeqV2    | 2:169875245 | intronic | G/G     | 4.44E-16 | 0 | 0 | 36 | 96 | 0/0 | NC | 0/0 | missing<br>GT | match | missing<br>GT |
| 132306 | Agilent38MB | 2:169875245 | intronic | G/G     | 4.44E-16 | 0 | 0 | 34 | 93 | 0/0 | NC | 0/0 | missing<br>GT | match | missing<br>GT |
| 163383 | TruSeqV2    | 2:169875245 | intronic | G/G     | 4.44E-16 | 0 | 0 | 34 | 96 | 0/0 | NC | 0/0 | missing<br>GT | match | missing<br>GT |
| 198564 | Agilent38MB | 2:169875245 | intronic | G/G     | 1.11E-15 | 0 | 0 | 57 | 99 | 0/0 | NC | 0/0 | missing<br>GT | match | missing<br>GT |
| 108971 | TruSeqV2    | 2:169875534 | intronic | CCT/CCT | 6.66E-16 | 0 | 0 | 32 | 87 | 0/0 | NC | 0/0 | missing<br>GT | match | missing<br>GT |
| 115239 | TruSeqV2    | 2:169875534 | intronic | CCT/CCT | 1.40E-13 | 0 | 0 | 32 | 87 | 0/0 | NC | 0/0 | missing<br>GT | match | missing<br>GT |
| 132306 | Agilent38MB | 2:169875534 | intronic | CCT/CCT | 1.55E-12 | 0 | 0 | 32 | 87 | 0/0 | NC | 0/0 | missing<br>GT | match | missing<br>GT |
| 163383 | TruSeqV2    | 2:169875534 | intronic | CCT/CCT | 4.44E-16 | 0 | 0 | 32 | 87 | 0/0 | NC | 0/0 | missing<br>GT | match | missing<br>GT |
| 198564 | Agilent38MB | 2:169875534 | intronic | CCT/CCT | 2.22E-16 | 0 | 0 | 32 | 87 | 0/0 | NC | 0/0 | missing<br>GT | match | missing<br>GT |
| 108971 | TruSeqV2    | 2:169875539 | intronic | G/G     | 8.52E-07 | 0 | 0 | 30 | 81 | 0/0 | NC | 0/0 | missing<br>GT | match | missing<br>GT |

|        |             |             |          |     |          |   |   |    |    |     |    |     |               |       |               |
|--------|-------------|-------------|----------|-----|----------|---|---|----|----|-----|----|-----|---------------|-------|---------------|
| 115239 | TruSeqV2    | 2:169875539 | intronic | G/G | 9.98E-08 | 0 | 0 | 34 | 99 | 0/0 | NC | 0/0 | missing<br>GT | match | missing<br>GT |
| 132306 | Agilent38MB | 2:169875539 | intronic | G/G | 1.96E-05 | 0 | 0 | 31 | 81 | 0/0 | NC | 0/0 | missing<br>GT | match | missing<br>GT |
| 163383 | TruSeqV2    | 2:169875539 | intronic | G/G | 4.33E-08 | 0 | 0 | 28 | 75 | 0/0 | NC | 0/0 | missing<br>GT | match | missing<br>GT |
| 108971 | TruSeqV2    | 2:169877085 | intronic | T/T | 4.44E-16 | 0 | 0 | 42 | 94 | 0/0 | NC | 0/0 | missing<br>GT | match | missing<br>GT |
| 115239 | TruSeqV2    | 2:169877085 | intronic | T/T | 4.44E-16 | 0 | 0 | 53 | 99 | 0/0 | NC | 0/0 | missing<br>GT | match | missing<br>GT |
| 132306 | Agilent38MB | 2:169877085 | intronic | T/T | 8.88E-16 | 0 | 0 | 29 | 81 | 0/0 | NC | 0/0 | missing<br>GT | match | missing<br>GT |
| 163383 | TruSeqV2    | 2:169877085 | intronic | T/T | 4.44E-16 | 0 | 0 | 36 | 96 | 0/0 | NC | 0/0 | missing<br>GT | match | missing<br>GT |
| 108971 | TruSeqV2    | 2:169880178 | intronic | G/A | 1.11E-15 | 0 | 0 | 42 | 99 | 0/1 | NC | 0/1 | missing<br>GT | match | missing<br>GT |
| 115239 | TruSeqV2    | 2:169880178 | intronic | G/A | 3.33E-15 | 0 | 0 | 39 | 99 | 0/1 | NC | 0/1 | missing<br>GT | match | missing<br>GT |
| 132306 | Agilent38MB | 2:169880178 | intronic | G/A | 1.11E-15 | 0 | 0 | 37 | 99 | 0/1 | NC | 0/1 | missing<br>GT | match | missing<br>GT |
| 163383 | TruSeqV2    | 2:169880178 | intronic | G/A | 1.33E-15 | 0 | 0 | 51 | 99 | 0/1 | NC | 0/1 | missing<br>GT | match | missing<br>GT |
| 198564 | Agilent38MB | 2:169880178 | intronic | G/G | 1.78E-15 | 0 | 0 | 52 | 99 | 1/1 | NC | 1/1 | missing<br>GT | match | missing<br>GT |
| 108971 | TruSeqV2    | 2:169881691 | intronic | G/A | 1.55E-15 | 0 | 0 | 45 | 99 | 0/1 | NC | 0/1 | missing<br>GT | match | missing<br>GT |
| 115239 | TruSeqV2    | 2:169881691 | intronic | G/A | 1.21E-13 | 0 | 0 | 41 | 99 | 0/1 | NC | 0/1 | missing<br>GT | match | missing<br>GT |
| 132306 | Agilent38MB | 2:169881691 | intronic | G/A | 9.41E-14 | 0 | 0 | 24 | 99 | 0/1 | NC | 0/1 | missing<br>GT | match | missing<br>GT |
| 163383 | TruSeqV2    | 2:169881691 | intronic | G/A | 8.22E-15 | 0 | 0 | 47 | 99 | 0/1 | NC | 0/1 | missing<br>GT | match | missing<br>GT |
| 198564 | Agilent38MB | 2:169881691 | intronic | G/G | 5.11E-15 | 0 | 0 | 47 | 99 | 1/1 | NC | 1/1 | missing<br>GT | match | missing<br>GT |
| 108971 | TruSeqV2    | 2:169882084 | intronic | A/A | 6.66E-16 | 0 | 0 | 42 | 99 | 0/0 | NC | 0/0 | missing<br>GT | match | missing<br>GT |
| 115239 | TruSeqV2    | 2:169882084 | intronic | A/A | 1.11E-15 | 0 | 0 | 35 | 21 | 0/0 | NC | 0/0 | missing<br>GT | match | missing<br>GT |



|        |             |             |            |     |          |   |   |    |    |     |    |     |               |       |               |
|--------|-------------|-------------|------------|-----|----------|---|---|----|----|-----|----|-----|---------------|-------|---------------|
| 132306 | Agilent38MB | 2:169882084 | intronic   | A/A | 6.66E-16 | 0 | 0 | 39 | 99 | 0/0 | NC | 0/0 | missing<br>GT | match | missing<br>GT |
| 163383 | TruSeqV2    | 2:169882084 | intronic   | A/A | 6.66E-16 | 0 | 0 | 40 | 99 | 0/0 | NC | 0/0 | missing<br>GT | match | missing<br>GT |
| 198564 | Agilent38MB | 2:169882084 | intronic   | A/A | 1.78E-15 | 0 | 0 | 44 | 99 | 0/0 | NC | 0/0 | missing<br>GT | match | missing<br>GT |
| 108971 | TruSeqV2    | 2:169883218 | intronic   | C/C | 1.63E-09 | 0 | 0 | 47 | 99 | 0/0 | NC | 0/0 | missing<br>GT | match | missing<br>GT |
| 115239 | TruSeqV2    | 2:169883218 | intronic   | C/C | 8.88E-16 | 0 | 0 | 49 | 99 | 0/0 | NC | 0/0 | missing<br>GT | match | missing<br>GT |
| 132306 | Agilent38MB | 2:169883218 | intronic   | C/C | 4.12E-11 | 0 | 0 | 43 | 99 | 0/0 | NC | 0/0 | missing<br>GT | match | missing<br>GT |
| 163383 | TruSeqV2    | 2:169883218 | intronic   | C/C | 6.73E-14 | 0 | 0 | 40 | 99 | 0/0 | NC | 0/0 | missing<br>GT | match | missing<br>GT |
| 198564 | Agilent38MB | 2:169883218 | intronic   | T/C | 2.22E-15 | 0 | 0 | 51 | 99 | 0/1 | NC | 0/1 | missing<br>GT | match | missing<br>GT |
| 108971 | TruSeqV2    | 2:169884648 | intronic   | T/C | 4.44E-16 | 0 | 0 | 37 | 99 | 0/1 | NC | 0/1 | missing<br>GT | match | missing<br>GT |
| 115239 | TruSeqV2    | 2:169884648 | intronic   | T/C | 4.44E-16 | 0 | 0 | 32 | 99 | 0/1 | NC | 0/1 | missing<br>GT | match | missing<br>GT |
| 132306 | Agilent38MB | 2:169884648 | intronic   | T/C | 8.88E-16 | 0 | 0 | 39 | 99 | 0/1 | NC | 0/1 | missing<br>GT | match | missing<br>GT |
| 163383 | TruSeqV2    | 2:169884648 | intronic   | T/C | 4.44E-16 | 0 | 0 | 34 | 99 | 0/1 | NC | 0/1 | missing<br>GT | match | missing<br>GT |
| 198564 | Agilent38MB | 2:169884648 | intronic   | C/C | 3.91E-13 | 0 | 0 | 39 | 99 | 1/1 | NC | 1/1 | missing<br>GT | match | missing<br>GT |
| 108971 | TruSeqV2    | 2:169887154 | intronic   | G/G | 4.44E-16 | 0 | 0 | 34 | 93 | 0/0 | NC | 0/0 | missing<br>GT | match | missing<br>GT |
| 115239 | TruSeqV2    | 2:169887154 | intronic   | G/G | 2.22E-16 | 0 | 0 | 41 | 99 | 0/0 | NC | 0/0 | missing<br>GT | match | missing<br>GT |
| 132306 | Agilent38MB | 2:169887154 | intronic   | G/G | 6.66E-16 | 0 | 0 | 29 | 75 | 0/0 | NC | 0/0 | missing<br>GT | match | missing<br>GT |
| 163383 | TruSeqV2    | 2:169887154 | intronic   | G/G | 4.44E-16 | 0 | 0 | 33 | 84 | 0/0 | NC | 0/0 | missing<br>GT | match | missing<br>GT |
| 198564 | Agilent38MB | 2:169887154 | intronic   | G/A | 3.60E-14 | 0 | 0 | 49 | 99 | 0/1 | NC | 0/1 | missing<br>GT | match | missing<br>GT |
| 108971 | TruSeqV2    | 2:201539206 | intergenic | T/T | 9.64E-14 | 0 | 0 | 35 | 99 | 0/0 | NC | 0/0 | missing<br>GT | match | missing<br>GT |

|        |             |             |            |     |          |   |   |    |    |     |    |     |               |       |               |
|--------|-------------|-------------|------------|-----|----------|---|---|----|----|-----|----|-----|---------------|-------|---------------|
| 115239 | TruSeqV2    | 2:201539206 | intergenic | C/T | 8.88E-16 | 0 | 0 | 37 | 99 | 0/1 | NC | 0/1 | missing<br>GT | match | missing<br>GT |
| 132306 | Agilent38MB | 2:201539206 | intergenic | C/T | 4.44E-16 | 0 | 0 | 27 | 99 | 0/1 | NC | 0/1 | missing<br>GT | match | missing<br>GT |
| 163383 | TruSeqV2    | 2:201539206 | intergenic | T/T | 3.73E-14 | 0 | 0 | 24 | 66 | 0/0 | NC | 0/0 | missing<br>GT | match | missing<br>GT |
| 198564 | Agilent38MB | 2:201539206 | intergenic | C/T | 8.88E-16 | 0 | 0 | 38 | 99 | 0/1 | NC | 0/1 | missing<br>GT | match | missing<br>GT |
| 108971 | TruSeqV2    | 2:201540533 | intergenic | G/G | 5.20E-14 | 0 | 0 | 55 | 99 | 0/0 | NC | 0/0 | missing<br>GT | match | missing<br>GT |
| 115239 | TruSeqV2    | 2:201540533 | intergenic | A/G | 6.66E-16 | 0 | 0 | 48 | 99 | 0/1 | NC | 0/1 | missing<br>GT | match | missing<br>GT |
| 132306 | Agilent38MB | 2:201540533 | intergenic | A/G | 6.66E-16 | 0 | 0 | 38 | 99 | 0/1 | NC | 0/1 | missing<br>GT | match | missing<br>GT |
| 163383 | TruSeqV2    | 2:201540533 | intergenic | G/G | 5.55E-14 | 0 | 0 | 65 | 99 | 0/0 | NC | 0/0 | missing<br>GT | match | missing<br>GT |
| 108971 | TruSeqV2    | 2:201541621 | intergenic | C/C | 6.06E-14 | 0 | 0 | 28 | 62 | 0/0 | NC | 0/0 | missing<br>GT | match | missing<br>GT |
| 115239 | TruSeqV2    | 2:201541621 | intergenic | C/C | 7.66E-14 | 0 | 0 | 32 | 69 | 0/0 | NC | 0/0 | missing<br>GT | match | missing<br>GT |
| 132306 | Agilent38MB | 2:201541621 | intergenic | C/C | 6.66E-16 | 0 | 0 | 27 | 72 | 0/0 | NC | 0/0 | missing<br>GT | match | missing<br>GT |
| 198564 | Agilent38MB | 2:201541621 | intergenic | C/T | 9.17E-14 | 0 | 0 | 39 | 99 | 0/1 | NC | 0/1 | missing<br>GT | match | missing<br>GT |
| 108971 | TruSeqV2    | 2:201541827 | intergenic | A/G | 1.20E-13 | 0 | 0 | 47 | 99 | 0/1 | NC | 0/1 | missing<br>GT | match | missing<br>GT |
| 115239 | TruSeqV2    | 2:201541827 | intergenic | A/G | 2.88E-13 | 0 | 0 | 34 | 99 | 0/1 | NC | 0/1 | missing<br>GT | match | missing<br>GT |
| 132306 | Agilent38MB | 2:201541827 | intergenic | G/G | 4.44E-16 | 0 | 0 | 35 | 96 | 0/0 | NC | 0/0 | missing<br>GT | match | missing<br>GT |
| 163383 | TruSeqV2    | 2:201541827 | intergenic | G/G | 3.77E-15 | 0 | 0 | 48 | 99 | 0/0 | NC | 0/0 | missing<br>GT | match | missing<br>GT |
| 108971 | TruSeqV2    | 2:201542014 | intergenic | G/T | 4.44E-15 | 0 | 0 | 42 | 99 | 0/1 | NC | 0/1 | missing<br>GT | match | missing<br>GT |
| 115239 | TruSeqV2    | 2:201542014 | intergenic | G/T | 3.63E-13 | 0 | 0 | 41 | 99 | 0/1 | NC | 0/1 | missing<br>GT | match | missing<br>GT |
| 132306 | Agilent38MB | 2:201542014 | intergenic | T/T | 1.11E-15 | 0 | 0 | 25 | 69 | 0/0 | NC | 0/0 | GT            | match | GT            |

|        |             |             |            |     |          |   |   |    |    |     |    |     |               |       |               |
|--------|-------------|-------------|------------|-----|----------|---|---|----|----|-----|----|-----|---------------|-------|---------------|
| 163383 | TruSeqV2    | 2:201542014 | intergenic | T/T | 6.44E-15 | 0 | 0 | 39 | 99 | 0/0 | NC | 0/0 | missing<br>GT | match | missing<br>GT |
| 108971 | TruSeqV2    | 2:201543496 | intergenic | C/T | 2.22E-15 | 0 | 0 | 41 | 99 | 0/1 | NC | 0/1 | missing<br>GT | match | missing<br>GT |
| 115239 | TruSeqV2    | 2:201543496 | intergenic | C/T | 3.11E-15 | 0 | 0 | 40 | 99 | 0/1 | NC | 0/1 | missing<br>GT | match | missing<br>GT |
| 132306 | Agilent38MB | 2:201543496 | intergenic | T/T | 2.00E-15 | 0 | 0 | 37 | 99 | 1/1 | NC | 1/1 | missing<br>GT | match | missing<br>GT |
| 163383 | TruSeqV2    | 2:201543496 | intergenic | C/C | 1.15E-14 | 0 | 0 | 30 | 75 | 0/0 | NC | 0/0 | missing<br>GT | match | missing<br>GT |
| 198564 | Agilent38MB | 2:201543496 | intergenic | T/T | 7.11E-15 | 0 | 0 | 39 | 99 | 1/1 | NC | 1/1 | missing<br>GT | match | missing<br>GT |
| 108971 | TruSeqV2    | 2:234665659 | promoter   | T/T | 1.11E-15 | 0 | 0 | 20 | 54 | 0/0 | NC | 0/0 | missing<br>GT | match | missing<br>GT |
| 115239 | TruSeqV2    | 2:234665659 | promoter   | G/G | 1.11E-15 | 0 | 0 | 41 | 99 | 1/1 | NC | 1/1 | missing<br>GT | match | missing<br>GT |
| 163383 | TruSeqV2    | 2:234665659 | promoter   | T/T | 1.11E-15 | 0 | 0 | 25 | 44 | 0/0 | NC | 0/0 | missing<br>GT | match | missing<br>GT |
| 108971 | TruSeqV2    | 2:234665782 | promoter   | G/G | 6.66E-16 | 0 | 0 | 22 | 63 | 0/0 | NC | 0/0 | missing<br>GT | match | missing<br>GT |
| 115239 | TruSeqV2    | 2:234665782 | promoter   | A/G | 1.11E-15 | 0 | 0 | 24 | 99 | 0/1 | NC | 0/1 | missing<br>GT | match | missing<br>GT |
| 132306 | Agilent38MB | 2:234665782 | promoter   | A/G | 6.66E-16 | 0 | 0 | 16 | 99 | 0/1 | NC | 0/1 | missing<br>GT | match | missing<br>GT |
| 163383 | TruSeqV2    | 2:234665782 | promoter   | G/G | 4.44E-16 | 0 | 0 | 25 | 63 | 0/0 | NC | 0/0 | missing<br>GT | match | missing<br>GT |
| 108971 | TruSeqV2    | 2:234665983 | intronic   | A/A | 1.11E-15 | 0 | 0 | 11 | 30 | 0/0 | NC | 0/0 | missing<br>GT | match | missing<br>GT |
| 115239 | TruSeqV2    | 2:234665983 | intronic   | A/G | 3.11E-14 | 0 | 0 | 12 | 80 | 0/1 | NC | 0/1 | missing<br>GT | match | missing<br>GT |
| 132306 | Agilent38MB | 2:234665983 | intronic   | A/G | 4.44E-16 | 0 | 0 | 8  | 42 | 0/1 | NC | 0/1 | missing<br>GT | match | missing<br>GT |
| 163383 | TruSeqV2    | 2:234665983 | intronic   | A/A | 6.66E-16 | 0 | 0 | 12 | 36 | 0/0 | NC | 0/0 | missing<br>GT | match | missing<br>GT |
| 198564 | Agilent38MB | 2:234665983 | intronic   | A/A | 8.88E-16 | 0 | 0 | 19 | 51 | 0/0 | NC | 0/0 | missing<br>GT | match | missing<br>GT |
| 108971 | TruSeqV2    | 2:234667582 | intronic   | A/A | 2.00E-15 | 0 | 0 | 40 | 99 | 0/0 | NC | 0/0 | missing<br>GT | match | missing<br>GT |

|        |             |             |          |     |          |   |   |    |    |     |    |     |               |       |               |
|--------|-------------|-------------|----------|-----|----------|---|---|----|----|-----|----|-----|---------------|-------|---------------|
| 115239 | TruSeqV2    | 2:234667582 | intronic | C/C | 1.69E-14 | 0 | 0 | 31 | 93 | 1/1 | NC | 1/1 | missing<br>GT | match | missing<br>GT |
| 132306 | Agilent38MB | 2:234667582 | intronic | A/C | 5.81E-12 | 0 | 0 | 32 | 99 | 0/1 | NC | 0/1 | missing<br>GT | match | missing<br>GT |
| 163383 | TruSeqV2    | 2:234667582 | intronic | A/A | 3.95E-14 | 0 | 0 | 35 | 99 | 0/0 | NC | 0/0 | missing<br>GT | match | missing<br>GT |
| 108971 | TruSeqV2    | 2:234668570 | intronic | C/C | 1.82E-14 | 0 | 0 | 23 | 57 | 0/0 | NC | 0/0 | missing<br>GT | match | missing<br>GT |
| 115239 | TruSeqV2    | 2:234668570 | intronic | C/T | 8.88E-15 | 0 | 0 | 31 | 99 | 0/1 | NC | 0/1 | missing<br>GT | match | missing<br>GT |
| 132306 | Agilent38MB | 2:234668570 | intronic | C/T | 2.69E-14 | 0 | 0 | 25 | 99 | 0/1 | NC | 0/1 | missing<br>GT | match | missing<br>GT |
| 163383 | TruSeqV2    | 2:234668570 | intronic | C/C | 6.44E-15 | 0 | 0 | 30 | 84 | 0/0 | NC | 0/0 | missing<br>GT | match | missing<br>GT |
| 198564 | Agilent38MB | 2:234668570 | intronic | C/C | 9.55E-15 | 0 | 0 | 20 | 54 | 0/0 | NC | 0/0 | missing<br>GT | match | missing<br>GT |
| 108971 | TruSeqV2    | 2:234675738 | missense | G/G | 8.88E-16 | 0 | 0 | 45 | 99 | 0/0 | NC | 0/0 | missing<br>GT | match | missing<br>GT |
| 115239 | TruSeqV2    | 2:234675738 | missense | G/G | 4.44E-16 | 0 | 0 | 50 | 99 | 0/0 | NC | 0/0 | missing<br>GT | match | missing<br>GT |
| 163383 | TruSeqV2    | 2:234675738 | missense | G/G | 2.22E-16 | 0 | 0 | 33 | 96 | 0/0 | NC | 0/0 | missing<br>GT | match | missing<br>GT |
| 108971 | TruSeqV2    | 2:234675807 | missense | A/A | 2.44E-15 | 0 | 0 | 55 | 99 | 0/0 | NC | 0/0 | missing<br>GT | match | missing<br>GT |
| 115239 | TruSeqV2    | 2:234675807 | missense | A/A | 5.11E-15 | 0 | 0 | 50 | 99 | 0/0 | NC | 0/0 | missing<br>GT | match | missing<br>GT |
| 163383 | TruSeqV2    | 2:234675807 | missense | A/A | 4.44E-16 | 0 | 0 | 44 | 99 | 0/0 | NC | 0/0 | missing<br>GT | match | missing<br>GT |
| 108971 | TruSeqV2    | 2:234676519 | stop     | C/C | 1.78E-15 | 0 | 0 | 44 | 99 | 0/0 | NC | 0/0 | missing<br>GT | match | missing<br>GT |
| 115239 | TruSeqV2    | 2:234676519 | stop     | C/C | 8.88E-16 | 0 | 0 | 28 | 63 | 0/0 | NC | 0/0 | missing<br>GT | match | missing<br>GT |
| 163383 | TruSeqV2    | 2:234676519 | stop     | C/C | 2.22E-16 | 0 | 0 | 37 | 99 | 0/0 | NC | 0/0 | missing<br>GT | match | missing<br>GT |
| 108971 | TruSeqV2    | 2:234676567 | stop     | C/C | 6.66E-16 | 0 | 0 | 48 | 99 | 0/0 | NC | 0/0 | missing<br>GT | match | missing<br>GT |
| 115239 | TruSeqV2    | 2:234676567 | stop     | C/C | 1.33E-15 | 0 | 0 | 37 | 99 | 0/0 | NC | 0/0 | missing<br>GT | match | missing<br>GT |

|        |          |             |          |     |          |   |   |    |    |     |    |     |               |       |               |
|--------|----------|-------------|----------|-----|----------|---|---|----|----|-----|----|-----|---------------|-------|---------------|
| 163383 | TruSeqV2 | 2:234676567 | stop     | C/C | 6.66E-16 | 0 | 0 | 45 | 99 | 0/0 | NC | 0/0 | missing<br>GT | match | missing<br>GT |
| 108971 | TruSeqV2 | 2:234676568 | missense | A/A | 4.44E-16 | 0 | 0 | 48 | 99 | 0/0 | NC | 0/0 | missing<br>GT | match | missing<br>GT |
| 115239 | TruSeqV2 | 2:234676568 | missense | A/A | 4.44E-16 | 0 | 0 | 38 | 99 | 0/0 | NC | 0/0 | missing<br>GT | match | missing<br>GT |
| 163383 | TruSeqV2 | 2:234676568 | missense | A/A | 6.44E-15 | 0 | 0 | 43 | 99 | 0/0 | NC | 0/0 | missing<br>GT | match | missing<br>GT |
| 108971 | TruSeqV2 | 2:234676880 | missense | C/C | 2.22E-16 | 0 | 0 | 50 | 99 | 0/0 | NC | 0/0 | missing<br>GT | match | missing<br>GT |
| 115239 | TruSeqV2 | 2:234676880 | missense | C/C | 2.22E-16 | 0 | 0 | 54 | 99 | 0/0 | NC | 0/0 | missing<br>GT | match | missing<br>GT |
| 163383 | TruSeqV2 | 2:234676880 | missense | C/C | 2.22E-16 | 0 | 0 | 48 | 99 | 0/0 | NC | 0/0 | missing<br>GT | match | missing<br>GT |
| 108971 | TruSeqV2 | 2:234676883 | missense | G/G | 6.44E-15 | 0 | 0 | 48 | 99 | 0/0 | NC | 0/0 | missing<br>GT | match | missing<br>GT |
| 115239 | TruSeqV2 | 2:234676883 | missense | G/G | 1.33E-15 | 0 | 0 | 54 | 99 | 0/0 | NC | 0/0 | missing<br>GT | match | missing<br>GT |
| 163383 | TruSeqV2 | 2:234676883 | missense | G/G | 2.22E-16 | 0 | 0 | 50 | 99 | 0/0 | NC | 0/0 | missing<br>GT | match | missing<br>GT |
| 108971 | TruSeqV2 | 2:234676905 | missense | C/C | 1.11E-15 | 0 | 0 | 46 | 99 | 0/0 | NC | 0/0 | missing<br>GT | match | missing<br>GT |
| 115239 | TruSeqV2 | 2:234676905 | missense | C/C | 4.44E-16 | 0 | 0 | 50 | 99 | 0/0 | NC | 0/0 | missing<br>GT | match | missing<br>GT |
| 163383 | TruSeqV2 | 2:234676905 | missense | C/C | 1.33E-15 | 0 | 0 | 49 | 99 | 0/0 | NC | 0/0 | missing<br>GT | match | missing<br>GT |
| 108971 | TruSeqV2 | 2:234676924 | missense | C/C | 3.11E-15 | 0 | 0 | 31 | 84 | 0/0 | NC | 0/0 | missing<br>GT | match | missing<br>GT |
| 115239 | TruSeqV2 | 2:234676924 | missense | C/C | 6.66E-16 | 0 | 0 | 42 | 99 | 0/0 | NC | 0/0 | missing<br>GT | match | missing<br>GT |
| 163383 | TruSeqV2 | 2:234676924 | missense | C/C | 1.55E-15 | 0 | 0 | 49 | 99 | 0/0 | NC | 0/0 | missing<br>GT | match | missing<br>GT |
| 108971 | TruSeqV2 | 2:234676982 | missense | G/G | 1.01E-13 | 0 | 0 | 39 | 99 | 0/0 | NC | 0/0 | missing<br>GT | match | missing<br>GT |
| 115239 | TruSeqV2 | 2:234676982 | missense | G/G | 5.11E-15 | 0 | 0 | 37 | 99 | 0/0 | NC | 0/0 | missing<br>GT | match | missing<br>GT |
| 163383 | TruSeqV2 | 2:234676982 | missense | G/G | 1.47E-14 | 0 | 0 | 44 | 99 | 0/0 | NC | 0/0 | missing<br>GT | match | missing<br>GT |

|        |             |             |       |     |          |   |   |    |    |     |    |     |               |       |               |
|--------|-------------|-------------|-------|-----|----------|---|---|----|----|-----|----|-----|---------------|-------|---------------|
| 108971 | TruSeqV2    | 2:234681416 | 3'UTR | C/C | 2.22E-16 | 0 | 0 | 47 | 99 | 1/1 | NC | 1/1 | missing<br>GT | match | missing<br>GT |
| 115239 | TruSeqV2    | 2:234681416 | 3'UTR | C/C | 2.22E-16 | 0 | 0 | 30 | 55 | 1/1 | NC | 1/1 | missing<br>GT | match | missing<br>GT |
| 132306 | Agilent38MB | 2:234681416 | 3'UTR | C/T | 6.66E-16 | 0 | 0 | 30 | 99 | 0/1 | NC | 0/1 | missing<br>GT | match | missing<br>GT |
| 163383 | TruSeqV2    | 2:234681416 | 3'UTR | C/T | 1.55E-15 | 0 | 0 | 36 | 99 | 0/1 | NC | 0/1 | missing<br>GT | match | missing<br>GT |
| 198564 | Agilent38MB | 2:234681416 | 3'UTR | C/C | 2.22E-16 | 0 | 0 | 35 | 99 | 1/1 | NC | 1/1 | missing<br>GT | match | missing<br>GT |
| 108971 | TruSeqV2    | 2:234681544 | 3'UTR | C/C | 2.22E-16 | 0 | 0 | 44 | 99 | 1/1 | NC | 1/1 | missing<br>GT | match | missing<br>GT |
| 115239 | TruSeqV2    | 2:234681544 | 3'UTR | C/C | 2.22E-16 | 0 | 0 | 42 | 99 | 1/1 | NC | 1/1 | missing<br>GT | match | missing<br>GT |
| 132306 | Agilent38MB | 2:234681544 | 3'UTR | C/G | 8.88E-16 | 0 | 0 | 42 | 99 | 0/1 | NC | 0/1 | missing<br>GT | match | missing<br>GT |
| 163383 | TruSeqV2    | 2:234681544 | 3'UTR | C/G | 1.11E-15 | 0 | 0 | 38 | 99 | 0/1 | NC | 0/1 | missing<br>GT | match | missing<br>GT |
| 198564 | Agilent38MB | 2:234681544 | 3'UTR | C/C | 2.22E-16 | 0 | 0 | 33 | 99 | 1/1 | NC | 1/1 | missing<br>GT | match | missing<br>GT |
| 108971 | TruSeqV2    | 2:234681645 | 3'UTR | C/C | 4.44E-16 | 0 | 0 | 52 | 99 | 1/1 | NC | 1/1 | missing<br>GT | match | missing<br>GT |
| 115239 | TruSeqV2    | 2:234681645 | 3'UTR | C/C | 1.55E-15 | 0 | 0 | 45 | 92 | 1/1 | NC | 1/1 | missing<br>GT | match | missing<br>GT |
| 132306 | Agilent38MB | 2:234681645 | 3'UTR | C/G | 2.78E-14 | 0 | 0 | 29 | 99 | 0/1 | NC | 0/1 | missing<br>GT | match | missing<br>GT |
| 163383 | TruSeqV2    | 2:234681645 | 3'UTR | C/G | 1.15E-14 | 0 | 0 | 42 | 99 | 0/1 | NC | 0/1 | missing<br>GT | match | missing<br>GT |
| 198564 | Agilent38MB | 2:27422605  | 3'UTR | T/C | 1.33E-15 | 0 | 0 | 40 | 99 | 0/1 | NC | 0/1 | missing<br>GT | match | missing<br>GT |
| 132306 | Agilent38MB | 20:52771171 | 3'UTR | G/A | 1.78E-15 | 0 | 0 | 34 | 99 | 0/1 | NC | 0/1 | missing<br>GT | match | missing<br>GT |
| 198564 | Agilent38MB | 20:52771171 | 3'UTR | G/A | 2.44E-15 | 0 | 0 | 46 | 99 | 0/1 | NC | 0/1 | missing<br>GT | match | missing<br>GT |
| 132306 | Agilent38MB | 20:52771215 | 3'UTR | C/C | 9.55E-15 | 0 | 0 | 35 | 87 | 0/0 | NC | 0/0 | missing<br>GT | match | missing<br>GT |
| 132306 | Agilent38MB | 20:52771250 | 3'UTR | G/G | 4.44E-16 | 0 | 0 | 27 | 72 | 0/0 | NC | 0/0 | missing<br>GT | match | missing<br>GT |

|        |             |             |          |     |            |   |   |    |    |     |    |     |               |       |               |
|--------|-------------|-------------|----------|-----|------------|---|---|----|----|-----|----|-----|---------------|-------|---------------|
| 198564 | Agilent38MB | 20:52771250 | 3'UTR    | G/G | 1.02E-14   | 0 | 0 | 30 | 81 | 0/0 | NC | 0/0 | missing<br>GT | match | missing<br>GT |
| 132306 | Agilent38MB | 20:52771261 | 3'UTR    | G/G | 3.11E-15   | 0 | 0 | 26 | 60 | 0/0 | NC | 0/0 | missing<br>GT | match | missing<br>GT |
| 198564 | Agilent38MB | 20:52771261 | 3'UTR    | G/G | 5.10E-13   | 0 | 0 | 30 | 72 | 0/0 | NC | 0/0 | missing<br>GT | match | missing<br>GT |
| 108971 | TruSeqV2    | 20:61289743 | intronic | T/T | 2.08E-12   | 0 | 0 | 38 | 99 | 1/1 | NC | 1/1 | missing<br>GT | match | missing<br>GT |
| 115239 | TruSeqV2    | 20:61289743 | intronic | T/T | 8.45E-09   | 0 | 0 | 19 | 57 | 1/1 | NC | 1/1 | missing<br>GT | match | missing<br>GT |
| 163383 | TruSeqV2    | 20:61289743 | intronic | T/T | 4.88E-15   | 0 | 0 | 43 | 99 | 1/1 | NC | 1/1 | missing<br>GT | match | missing<br>GT |
| 198564 | Agilent38MB | 20:61289743 | intronic | T/T | 4.44E-10   | 0 | 0 | 37 | 99 | 1/1 | NC | 1/1 | missing<br>GT | match | missing<br>GT |
| 132306 | Agilent38MB | 20:61303742 | 3'UTR    | C/T | 1.11E-15   | 0 | 0 | 26 | 99 | 0/1 | NC | 0/1 | missing<br>GT | match | missing<br>GT |
| 115239 | TruSeqV2    | 21:37443565 | intronic | C/G | 6.66E-16   | 0 | 0 | 36 | 99 | 0/1 | NC | 0/1 | missing<br>GT | match | missing<br>GT |
| 132306 | Agilent38MB | 21:37443565 | intronic | C/C | 3.11E-15   | 0 | 0 | 37 | 99 | 1/1 | NC | 1/1 | missing<br>GT | match | missing<br>GT |
| 198564 | Agilent38MB | 21:37443565 | intronic | C/G | 6.66E-16   | 0 | 0 | 35 | 99 | 0/1 | NC | 0/1 | missing<br>GT | match | missing<br>GT |
| 108971 | TruSeqV2    | 21:37443893 | intronic | C/T | 8.88E-16   | 0 | 0 | 31 | 99 | 0/1 | NC | 0/1 | missing<br>GT | match | missing<br>GT |
| 115239 | TruSeqV2    | 21:37443893 | intronic | C/T | 6.66E-16   | 0 | 0 | 22 | 99 | 0/1 | NC | 0/1 | missing<br>GT | match | missing<br>GT |
| 132306 | Agilent38MB | 21:37443893 | intronic | C/C | 1.55E-15   | 0 | 0 | 33 | 99 | 1/1 | NC | 1/1 | missing<br>GT | match | missing<br>GT |
| 163383 | TruSeqV2    | 21:37443893 | intronic | C/C | 2.44E-15   | 0 | 0 | 34 | 99 | 1/1 | NC | 1/1 | missing<br>GT | match | missing<br>GT |
| 198564 | Agilent38MB | 21:37443893 | intronic | C/C | 6.66E-16   | 0 | 0 | 31 | 93 | 1/1 | NC | 1/1 | missing<br>GT | match | missing<br>GT |
| 163383 | TruSeqV2    | 21:37445739 | 3'UTR    | C/G | 5.33E-15   | 0 | 0 | 34 | 99 | 0/1 | NC | 0/1 | missing<br>GT | match | missing<br>GT |
| 108971 | TruSeqV2    | 21:37507501 | missense | G/G | 0.00010484 | 0 | 0 | 11 | 27 | 0/0 | NC | 0/0 | missing<br>GT | match | missing<br>GT |
| 163383 | TruSeqV2    | 21:37507501 | missense | G/G | 4.64E-12   | 0 | 0 | 8  | 15 | 0/0 | NC | 0/0 | missing<br>GT | match | missing<br>GT |

|        |             |             |          |     |          |   |   |    |    |     |    |     |               |       |               |
|--------|-------------|-------------|----------|-----|----------|---|---|----|----|-----|----|-----|---------------|-------|---------------|
| 108971 | TruSeqV2    | 21:43701977 | intronic | A/A | 2.44E-15 | 0 | 0 | 46 | 99 | 0/0 | NC | 0/0 | missing<br>GT | match | missing<br>GT |
| 115239 | TruSeqV2    | 21:43701977 | intronic | A/G | 4.44E-16 | 0 | 0 | 19 | 99 | 0/1 | NC | 0/1 | missing<br>GT | match | missing<br>GT |
| 132306 | Agilent38MB | 21:43701977 | intronic | A/G | 6.44E-15 | 0 | 0 | 32 | 99 | 0/1 | NC | 0/1 | missing<br>GT | match | missing<br>GT |
| 163383 | TruSeqV2    | 21:43701977 | intronic | A/A | 1.33E-15 | 0 | 0 | 29 | 75 | 0/0 | NC | 0/0 | missing<br>GT | match | missing<br>GT |
| 108971 | TruSeqV2    | 21:43706776 | intronic | G/G | 1.91E-14 | 0 | 0 | 38 | 99 | 0/0 | NC | 0/0 | missing<br>GT | match | missing<br>GT |
| 115239 | TruSeqV2    | 21:43706776 | intronic | G/G | 8.22E-15 | 0 | 0 | 22 | 54 | 0/0 | NC | 0/0 | missing<br>GT | match | missing<br>GT |
| 163383 | TruSeqV2    | 21:43706776 | intronic | G/G | 7.33E-15 | 0 | 0 | 28 | 72 | 0/0 | NC | 0/0 | missing<br>GT | match | missing<br>GT |
| 108971 | TruSeqV2    | 21:43707101 | intronic | C/C | 1.50E-13 | 0 | 0 | 34 | 78 | 0/0 | NC | 0/0 | missing<br>GT | match | missing<br>GT |
| 115239 | TruSeqV2    | 21:43707101 | intronic | C/C | 2.66E-15 | 0 | 0 | 23 | 54 | 0/0 | NC | 0/0 | missing<br>GT | match | missing<br>GT |
| 163383 | TruSeqV2    | 21:43707101 | intronic | C/G | 3.55E-15 | 0 | 0 | 24 | 99 | 0/1 | NC | 0/1 | missing<br>GT | match | missing<br>GT |
| 132306 | Agilent38MB | 21:43710909 | intronic | C/C | 5.08E-14 | 0 | 0 | 29 | 81 | 0/0 | NC | 0/0 | missing<br>GT | match | missing<br>GT |
| 108971 | TruSeqV2    | 21:43716022 | intronic | A/A | 3.77E-15 | 0 | 0 | 39 | 99 | 1/1 | NC | 1/1 | missing<br>GT | match | missing<br>GT |
| 115239 | TruSeqV2    | 21:43716022 | intronic | A/G | 8.88E-16 | 0 | 0 | 40 | 99 | 0/1 | NC | 0/1 | missing<br>GT | match | missing<br>GT |
| 163383 | TruSeqV2    | 21:43716022 | intronic | A/A | 2.22E-15 | 0 | 0 | 40 | 99 | 1/1 | NC | 1/1 | missing<br>GT | match | missing<br>GT |
| 132306 | Agilent38MB | 21:43716901 | 3'UTR    | A/G | 6.66E-16 | 0 | 0 | 33 | 99 | 0/1 | NC | 0/1 | missing<br>GT | match | missing<br>GT |
| 108971 | TruSeqV2    | 21:43718483 | 3'UTR    | A/A | 4.22E-15 | 0 | 0 | 45 | 99 | 1/1 | NC | 1/1 | missing<br>GT | match | missing<br>GT |
| 115239 | TruSeqV2    | 21:43718483 | 3'UTR    | A/G | 4.44E-15 | 0 | 0 | 50 | 99 | 0/1 | NC | 0/1 | missing<br>GT | match | missing<br>GT |
| 163383 | TruSeqV2    | 21:43718483 | 3'UTR    | A/A | 8.88E-16 | 0 | 0 | 43 | 99 | 1/1 | NC | 1/1 | missing<br>GT | match | missing<br>GT |
| 198564 | Agilent38MB | 21:43718483 | 3'UTR    | A/A | 8.88E-16 | 0 | 0 | 49 | 99 | 1/1 | NC | 1/1 | missing<br>GT | match | missing<br>GT |



|        |             |             |           |     |            |   |   |    |    |     |    |     |               |       |               |
|--------|-------------|-------------|-----------|-----|------------|---|---|----|----|-----|----|-----|---------------|-------|---------------|
| 108971 | TruSeqV2    | 21:46961496 | intronic  | T/T | 1.55E-15   | 0 | 0 | 33 | 84 | 0/0 | NC | 0/0 | missing<br>GT | match | missing<br>GT |
| 115239 | TruSeqV2    | 21:46961496 | intronic  | T/T | 1.35E-14   | 0 | 0 | 21 | 45 | 0/0 | NC | 0/0 | missing<br>GT | match | missing<br>GT |
| 163383 | TruSeqV2    | 21:46961496 | intronic  | T/T | 1.33E-15   | 0 | 0 | 54 | 99 | 0/0 | NC | 0/0 | missing<br>GT | match | missing<br>GT |
| 132306 | Agilent38MB | 22:24324821 | missense  | C/C | 1.78E-15   | 0 | 0 | 7  | 0  | 0/0 | NC | 0/0 | missing<br>GT | match | missing<br>GT |
| 132306 | Agilent38MB | 22:42525035 | stop/miss | C/C | 2.22E-15   | 0 | 0 | 24 | 71 | 0/0 | NC | 0/0 | missing<br>GT | match | missing<br>GT |
| 198564 | Agilent38MB | 22:42525035 | stop/miss | C/C | 2.44E-15   | 0 | 0 | 30 | 81 | 0/0 | NC | 0/0 | missing<br>GT | match | missing<br>GT |
| 198564 | Agilent38MB | 22:42525132 | synon     | C/C | 2.82E-13   | 0 | 0 | 47 | 99 | 1/1 | NC | 1/1 | missing<br>GT | match | missing<br>GT |
| 108971 | TruSeqV2    | 22:42528382 | promoter  | G/C | 2.22E-15   | 0 | 0 | 34 | 99 | 0/1 | NC | 0/1 | missing<br>GT | match | missing<br>GT |
| 115239 | TruSeqV2    | 22:42528382 | promoter  | G/G | 4.44E-16   | 0 | 0 | 27 | 81 | 1/1 | NC | 1/1 | missing<br>GT | match | missing<br>GT |
| 132306 | Agilent38MB | 22:42528382 | promoter  | G/G | 1.33E-15   | 0 | 0 | 38 | 99 | 1/1 | NC | 1/1 | missing<br>GT | match | missing<br>GT |
| 163383 | TruSeqV2    | 22:42528382 | promoter  | G/G | 6.66E-16   | 0 | 0 | 46 | 99 | 1/1 | NC | 1/1 | missing<br>GT | match | missing<br>GT |
| 115239 | TruSeqV2    | 22:42528568 | promoter  | C/C | 0.00048528 | 0 | 0 | 16 | 48 | 1/1 | NC | 1/1 | missing<br>GT | match | missing<br>GT |
| 198564 | Agilent38MB | 22:42528568 | promoter  | C/C | 1.87E-05   | 0 | 0 | 33 | 99 | 1/1 | NC | 1/1 | missing<br>GT | match | missing<br>GT |
| 115239 | TruSeqV2    | 22:42528976 | promoter  | C/C | 4.00E-15   | 0 | 0 | 21 | 51 | 0/0 | NC | 0/0 | missing<br>GT | match | missing<br>GT |
| 132306 | Agilent38MB | 22:44220673 | 3'UTR     | C/C | 4.49E-14   | 0 | 0 | 33 | 81 | 0/0 | NC | 0/0 | missing<br>GT | match | missing<br>GT |
| 198564 | Agilent38MB | 22:44220673 | 3'UTR     | C/C | 8.88E-16   | 0 | 0 | 44 | 99 | 0/0 | NC | 0/0 | missing<br>GT | match | missing<br>GT |
| 132306 | Agilent38MB | 22:44221247 | 3'UTR     | A/A | 4.44E-16   | 0 | 0 | 37 | 99 | 0/0 | NC | 0/0 | missing<br>GT | match | missing<br>GT |
| 132306 | Agilent38MB | 22:44221471 | 3'UTR     | C/C | 2.22E-16   | 0 | 0 | 37 | 99 | 0/0 | NC | 0/0 | missing<br>GT | match | missing<br>GT |
| 198564 | Agilent38MB | 22:44221471 | 3'UTR     | C/C | 5.33E-15   | 0 | 0 | 52 | 99 | 0/0 | NC | 0/0 | missing<br>GT | match | missing<br>GT |

|        |             |             |          |     |          |   |   |    |    |     |    |     |               |       |               |
|--------|-------------|-------------|----------|-----|----------|---|---|----|----|-----|----|-----|---------------|-------|---------------|
| 108971 | TruSeqV2    | 22:51068560 | promoter | G/G | 2.00E-15 | 0 | 0 | 41 | 99 | 0/0 | NC | 0/0 | missing<br>GT | match | missing<br>GT |
| 115239 | TruSeqV2    | 22:51068560 | promoter | G/A | 4.29E-14 | 0 | 0 | 34 | 99 | 0/1 | NC | 0/1 | missing<br>GT | match | missing<br>GT |
| 132306 | Agilent38MB | 22:51068560 | promoter | G/G | 4.66E-15 | 0 | 0 | 49 | 99 | 0/0 | NC | 0/0 | missing<br>GT | match | missing<br>GT |
| 163383 | TruSeqV2    | 22:51068560 | promoter | G/G | 2.66E-15 | 0 | 0 | 49 | 99 | 0/0 | NC | 0/0 | missing<br>GT | match | missing<br>GT |
| 198564 | Agilent38MB | 22:51068560 | promoter | G/A | 3.33E-15 | 0 | 0 | 39 | 99 | 0/1 | NC | 0/1 | missing<br>GT | match | missing<br>GT |
| 132306 | Agilent38MB | 3:119500035 | 5'UTR    | C/T | 6.09E-13 | 0 | 0 | 39 | 99 | 0/1 | NC | 0/1 | missing<br>GT | match | missing<br>GT |
| 132306 | Agilent38MB | 3:121660000 | 3'UTR    | T/T | 4.44E-16 | 0 | 0 | 40 | 99 | 0/0 | NC | 0/0 | missing<br>GT | match | missing<br>GT |
| 115239 | TruSeqV2    | 3:12477055  | 3'UTR    | C/G | 6.66E-16 | 0 | 0 | 54 | 99 | 0/1 | NC | 0/1 | missing<br>GT | match | missing<br>GT |
| 132306 | Agilent38MB | 3:12477055  | 3'UTR    | C/G | 3.33E-15 | 0 | 0 | 34 | 99 | 0/1 | NC | 0/1 | missing<br>GT | match | missing<br>GT |
| 163383 | TruSeqV2    | 3:12477055  | 3'UTR    | G/G | 8.88E-16 | 0 | 0 | 58 | 99 | 0/0 | NC | 0/0 | missing<br>GT | match | missing<br>GT |
| 198564 | Agilent38MB | 3:12477055  | 3'UTR    | G/G | 9.33E-15 | 0 | 0 | 66 | 99 | 0/0 | NC | 0/0 | missing<br>GT | match | missing<br>GT |
| 108971 | TruSeqV2    | 3:12478817  | 3'UTR    | G/G | 4.44E-16 | 0 | 0 | 23 | 66 | 0/0 | NC | 0/0 | missing<br>GT | match | missing<br>GT |
| 115239 | TruSeqV2    | 3:12478817  | 3'UTR    | G/G | 2.22E-16 | 0 | 0 | 12 | 33 | 0/0 | NC | 0/0 | missing<br>GT | match | missing<br>GT |
| 132306 | Agilent38MB | 3:12478817  | 3'UTR    | G/G | 4.44E-16 | 0 | 0 | 22 | 66 | 0/0 | NC | 0/0 | missing<br>GT | match | missing<br>GT |
| 163383 | TruSeqV2    | 3:12478817  | 3'UTR    | G/G | 2.22E-16 | 0 | 0 | 17 | 45 | 0/0 | NC | 0/0 | missing<br>GT | match | missing<br>GT |
| 108971 | TruSeqV2    | 3:126247198 | intronic | A/A | 2.22E-15 | 0 | 0 | 40 | 99 | 1/1 | NC | 1/1 | missing<br>GT | match | missing<br>GT |
| 115239 | TruSeqV2    | 3:126247198 | intronic | T/T | 2.00E-15 | 0 | 0 | 41 | 42 | 0/0 | NC | 0/0 | missing<br>GT | match | missing<br>GT |
| 132306 | Agilent38MB | 3:126247198 | intronic | A/T | 6.22E-15 | 0 | 0 | 30 | 99 | 0/1 | NC | 0/1 | missing<br>GT | match | missing<br>GT |
| 163383 | TruSeqV2    | 3:126247198 | intronic | A/T | 1.11E-15 | 0 | 0 | 39 | 99 | 0/1 | NC | 0/1 | missing<br>GT | match | missing<br>GT |

|        |             |             |            |     |           |   |   |    |    |     |    |     |               |       |               |
|--------|-------------|-------------|------------|-----|-----------|---|---|----|----|-----|----|-----|---------------|-------|---------------|
| 198564 | Agilent38MB | 3:126247198 | intronic   | A/T | 2.00E-15  | 0 | 0 | 31 | 99 | 0/1 | NC | 0/1 | missing<br>GT | match | missing<br>GT |
| 108971 | TruSeqV2    | 3:126249877 | intronic   | A/A | 1.23E-08  | 0 | 0 | 47 | 99 | 0/0 | NC | 0/0 | missing<br>GT | match | missing<br>GT |
| 132306 | Agilent38MB | 3:126249877 | intronic   | A/C | 8.56E-12  | 0 | 0 | 45 | 99 | 0/1 | NC | 0/1 | missing<br>GT | match | missing<br>GT |
| 163383 | TruSeqV2    | 3:126249877 | intronic   | A/C | 5.77E-15  | 0 | 0 | 45 | 99 | 0/1 | NC | 0/1 | missing<br>GT | match | missing<br>GT |
| 108971 | TruSeqV2    | 3:126256669 | intronic   | G/G | 3.33E-15  | 0 | 0 | 47 | 99 | 1/1 | NC | 1/1 | missing<br>GT | match | missing<br>GT |
| 115239 | TruSeqV2    | 3:126256669 | intronic   | T/T | 8.88E-16  | 0 | 0 | 32 | 13 | 0/0 | NC | 0/0 | missing<br>GT | match | missing<br>GT |
| 132306 | Agilent38MB | 3:126256669 | intronic   | G/T | 3.33E-15  | 0 | 0 | 39 | 99 | 0/1 | NC | 0/1 | missing<br>GT | match | missing<br>GT |
| 163383 | TruSeqV2    | 3:126256669 | intronic   | G/T | 1.29E-14  | 0 | 0 | 38 | 99 | 0/1 | NC | 0/1 | missing<br>GT | match | missing<br>GT |
| 198564 | Agilent38MB | 3:126256669 | intronic   | G/T | 2.29E-14  | 0 | 0 | 51 | 99 | 0/1 | NC | 0/1 | missing<br>GT | match | missing<br>GT |
| 108971 | TruSeqV2    | 3:126257872 | intronic   | C/C | 1.67E-14  | 0 | 0 | 42 | 99 | 0/0 | NC | 0/0 | missing<br>GT | match | missing<br>GT |
| 115239 | TruSeqV2    | 3:126257872 | intronic   | G/G | 2.77E-05  | 0 | 0 | 20 | 60 | 1/1 | NC | 1/1 | missing<br>GT | match | missing<br>GT |
| 163383 | TruSeqV2    | 3:126257872 | intronic   | C/G | 7.12E-11  | 0 | 0 | 24 | 99 | 0/1 | NC | 0/1 | missing<br>GT | match | missing<br>GT |
| 198564 | Agilent38MB | 3:126257872 | intronic   | C/G | 5.21E-09  | 0 | 0 | 36 | 99 | 0/1 | NC | 0/1 | missing<br>GT | match | missing<br>GT |
| 115239 | TruSeqV2    | 3:126261345 | missense   | G/G | 1.77E-11  | 0 | 0 | 5  | 12 | 0/0 | NC | 0/0 | missing<br>GT | match | missing<br>GT |
| 163383 | TruSeqV2    | 3:126261345 | missense   | A/G | 6.44E-15  | 0 | 0 | 7  | 9  | 0/1 | NC | 0/1 | missing<br>GT | match | missing<br>GT |
| 198564 | Agilent38MB | 3:126262092 | 3'UTR      | G/G | 4.44E-16  | 0 | 0 | 47 | 99 | 0/0 | NC | 0/0 | missing<br>GT | match | missing<br>GT |
| 163383 | TruSeqV2    | 3:142836966 | intergenic | G/G | 0.0001555 | 0 | 0 | 24 | 69 | 0/0 | NC | 0/0 | missing<br>GT | match | missing<br>GT |
| 108971 | TruSeqV2    | 3:142837272 | intergenic | G/G | 1.11E-15  | 0 | 0 | 36 | 99 | 0/0 | NC | 0/0 | missing<br>GT | match | missing<br>GT |
| 115239 | TruSeqV2    | 3:142837272 | intergenic | G/G | 2.95E-14  | 0 | 0 | 30 | 87 | 0/0 | NC | 0/0 | missing<br>GT | match | missing<br>GT |

|        |             |             |            |     |            |   |   |    |    |     |    |     |               |       |               |
|--------|-------------|-------------|------------|-----|------------|---|---|----|----|-----|----|-----|---------------|-------|---------------|
| 132306 | Agilent38MB | 3:142837272 | intergenic | G/G | 6.66E-16   | 0 | 0 | 31 | 93 | 0/0 | NC | 0/0 | missing<br>GT | match | missing<br>GT |
| 163383 | TruSeqV2    | 3:142837272 | intergenic | G/G | 6.66E-16   | 0 | 0 | 39 | 99 | 0/0 | NC | 0/0 | missing<br>GT | match | missing<br>GT |
| 198564 | Agilent38MB | 3:142837272 | intergenic | A/G | 6.66E-16   | 0 | 0 | 31 | 99 | 0/1 | NC | 0/1 | missing<br>GT | match | missing<br>GT |
| 108971 | TruSeqV2    | 3:142837361 | intergenic | T/T | 1.98E-05   | 0 | 0 | 43 | 99 | 0/0 | NC | 0/0 | missing<br>GT | match | missing<br>GT |
| 115239 | TruSeqV2    | 3:142837361 | intergenic | T/T | 0.00024107 | 0 | 0 | 51 | 99 | 0/0 | NC | 0/0 | missing<br>GT | match | missing<br>GT |
| 132306 | Agilent38MB | 3:142837361 | intergenic | T/T | 1.14E-12   | 0 | 0 | 28 | 75 | 0/0 | NC | 0/0 | missing<br>GT | match | missing<br>GT |
| 163383 | TruSeqV2    | 3:142837361 | intergenic | T/T | 4.68E-10   | 0 | 0 | 39 | 99 | 0/0 | NC | 0/0 | missing<br>GT | match | missing<br>GT |
| 198564 | Agilent38MB | 3:142837361 | intergenic | T/T | 3.77E-07   | 0 | 0 | 44 | 99 | 0/0 | NC | 0/0 | missing<br>GT | match | missing<br>GT |
| 198564 | Agilent38MB | 3:142841740 | 5'UTR      | T/T | 3.15E-14   | 0 | 0 | 43 | 99 | 1/1 | NC | 1/1 | missing<br>GT | match | missing<br>GT |
| 108971 | TruSeqV2    | 3:14467432  | intronic   | T/T | 4.44E-16   | 0 | 0 | 17 | 30 | 0/0 | NC | 0/0 | missing<br>GT | match | missing<br>GT |
| 115239 | TruSeqV2    | 3:14467432  | intronic   | T/T | 8.88E-16   | 0 | 0 | 20 | 20 | 0/0 | NC | 0/0 | missing<br>GT | match | missing<br>GT |
| 132306 | Agilent38MB | 3:14467432  | intronic   | T/T | 2.22E-16   | 0 | 0 | 24 | 54 | 0/0 | NC | 0/0 | missing<br>GT | match | missing<br>GT |
| 163383 | TruSeqV2    | 3:14467432  | intronic   | T/T | 2.22E-16   | 0 | 0 | 22 | 51 | 0/0 | NC | 0/0 | missing<br>GT | match | missing<br>GT |
| 198564 | Agilent38MB | 3:14467432  | intronic   | T/T | 6.44E-15   | 0 | 0 | 33 | 69 | 0/0 | NC | 0/0 | missing<br>GT | match | missing<br>GT |
| 108971 | TruSeqV2    | 3:14474225  | intronic   | C/T | 9.10E-15   | 0 | 0 | 31 | 99 | 0/1 | NC | 0/1 | missing<br>GT | match | missing<br>GT |
| 115239 | TruSeqV2    | 3:14474225  | intronic   | C/C | 4.44E-15   | 0 | 0 | 18 | 54 | 1/1 | NC | 1/1 | missing<br>GT | match | missing<br>GT |
| 163383 | TruSeqV2    | 3:14474225  | intronic   | C/C | 6.00E-15   | 0 | 0 | 42 | 99 | 1/1 | NC | 1/1 | missing<br>GT | match | missing<br>GT |
| 132306 | Agilent38MB | 3:14530721  | 3'UTR      | A/A | 6.66E-16   | 0 | 0 | 32 | 78 | 0/0 | NC | 0/0 | missing<br>GT | match | missing<br>GT |
| 198564 | Agilent38MB | 3:14530721  | 3'UTR      | A/A | 2.44E-15   | 0 | 0 | 42 | 99 | 0/0 | NC | 0/0 | missing<br>GT | match | missing<br>GT |

|        |             |             |            |     |          |   |   |    |    |     |    |     |               |       |               |
|--------|-------------|-------------|------------|-----|----------|---|---|----|----|-----|----|-----|---------------|-------|---------------|
| 132306 | Agilent38MB | 3:183637722 | 3'UTR      | T/G | 3.77E-15 | 0 | 0 | 49 | 99 | 0/1 | NC | 0/1 | missing<br>GT | match | missing<br>GT |
| 198564 | Agilent38MB | 3:183637722 | 3'UTR      | T/T | 2.89E-15 | 0 | 0 | 53 | 99 | 0/0 | NC | 0/0 | missing<br>GT | match | missing<br>GT |
| 132306 | Agilent38MB | 3:183637845 | 3'UTR      | T/T | 2.00E-15 | 0 | 0 | 38 | 99 | 0/0 | NC | 0/0 | missing<br>GT | match | missing<br>GT |
| 108971 | TruSeqV2    | 3:38322626  | 3'UTR      | C/C | 2.22E-16 | 0 | 0 | 35 | 90 | 0/0 | NC | 0/0 | missing<br>GT | match | missing<br>GT |
| 115239 | TruSeqV2    | 3:38322626  | 3'UTR      | C/C | 4.44E-16 | 0 | 0 | 33 | 72 | 0/0 | NC | 0/0 | missing<br>GT | match | missing<br>GT |
| 132306 | Agilent38MB | 3:38322626  | 3'UTR      | C/C | 8.44E-14 | 0 | 0 | 20 | 48 | 0/0 | NC | 0/0 | missing<br>GT | match | missing<br>GT |
| 163383 | TruSeqV2    | 3:38322626  | 3'UTR      | T/T | 9.27E-07 | 0 | 0 | 29 | 87 | 1/1 | NC | 1/1 | missing<br>GT | match | missing<br>GT |
| 198564 | Agilent38MB | 3:38322626  | 3'UTR      | C/T | 4.75E-08 | 0 | 0 | 33 | 99 | 0/1 | NC | 0/1 | missing<br>GT | match | missing<br>GT |
| 108971 | TruSeqV2    | 3:38324020  | 3'UTR      | C/C | 4.44E-16 | 0 | 0 | 42 | 99 | 0/0 | NC | 0/0 | missing<br>GT | match | missing<br>GT |
| 115239 | TruSeqV2    | 3:38324020  | 3'UTR      | C/C | 4.44E-16 | 0 | 0 | 17 | 48 | 0/0 | NC | 0/0 | missing<br>GT | match | missing<br>GT |
| 132306 | Agilent38MB | 3:38324020  | 3'UTR      | C/C | 4.44E-16 | 0 | 0 | 31 | 81 | 0/0 | NC | 0/0 | missing<br>GT | match | missing<br>GT |
| 163383 | TruSeqV2    | 3:38324020  | 3'UTR      | C/C | 4.44E-16 | 0 | 0 | 38 | 99 | 0/0 | NC | 0/0 | missing<br>GT | match | missing<br>GT |
| 198564 | Agilent38MB | 3:38324020  | 3'UTR      | C/C | 6.66E-16 | 0 | 0 | 44 | 99 | 0/0 | NC | 0/0 | missing<br>GT | match | missing<br>GT |
| 108971 | TruSeqV2    | 3:38327292  | 3'UTR      | G/G | 1.11E-15 | 0 | 0 | 42 | 99 | 0/0 | NC | 0/0 | missing<br>GT | match | missing<br>GT |
| 115239 | TruSeqV2    | 3:38327292  | 3'UTR      | G/G | 8.88E-16 | 0 | 0 | 47 | 99 | 0/0 | NC | 0/0 | missing<br>GT | match | missing<br>GT |
| 132306 | Agilent38MB | 3:38327292  | 3'UTR      | A/G | 3.77E-15 | 0 | 0 | 51 | 99 | 0/1 | NC | 0/1 | missing<br>GT | match | missing<br>GT |
| 163383 | TruSeqV2    | 3:38327292  | 3'UTR      | G/G | 1.55E-15 | 0 | 0 | 56 | 99 | 0/0 | NC | 0/0 | missing<br>GT | match | missing<br>GT |
| 198564 | Agilent38MB | 3:38327292  | 3'UTR      | G/G | 2.66E-15 | 0 | 0 | 42 | 99 | 0/0 | NC | 0/0 | missing<br>GT | match | missing<br>GT |
| 108971 | TruSeqV2    | 3:38363393  | intergenic | T/T | 1.33E-15 | 0 | 0 | 40 | 99 | 1/1 | NC | 1/1 | missing<br>GT | match | missing<br>GT |

|        |             |            |            |     |          |   |   |    |    |     |    |     |               |       |               |
|--------|-------------|------------|------------|-----|----------|---|---|----|----|-----|----|-----|---------------|-------|---------------|
| 115239 | TruSeqV2    | 3:38363393 | intergenic | T/T | 1.55E-15 | 0 | 0 | 37 | 99 | 1/1 | NC | 1/1 | missing<br>GT | match | missing<br>GT |
| 132306 | Agilent38MB | 3:38363393 | intergenic | C/T | 1.55E-15 | 0 | 0 | 32 | 99 | 0/1 | NC | 0/1 | missing<br>GT | match | missing<br>GT |
| 163383 | TruSeqV2    | 3:38363393 | intergenic | C/C | 3.55E-15 | 0 | 0 | 38 | 69 | 0/0 | NC | 0/0 | missing<br>GT | match | missing<br>GT |
| 198564 | Agilent38MB | 3:38363393 | intergenic | C/T | 1.36E-13 | 0 | 0 | 36 | 99 | 0/1 | NC | 0/1 | missing<br>GT | match | missing<br>GT |
| 108971 | TruSeqV2    | 3:38363837 | intergenic | A/A | 1.78E-15 | 0 | 0 | 41 | 99 | 0/0 | NC | 0/0 | missing<br>GT | match | missing<br>GT |
| 115239 | TruSeqV2    | 3:38363837 | intergenic | A/A | 4.44E-15 | 0 | 0 | 36 | 99 | 0/0 | NC | 0/0 | missing<br>GT | match | missing<br>GT |
| 132306 | Agilent38MB | 3:38363837 | intergenic | A/C | 8.88E-16 | 0 | 0 | 27 | 99 | 0/1 | NC | 0/1 | missing<br>GT | match | missing<br>GT |
| 163383 | TruSeqV2    | 3:38363837 | intergenic | C/C | 5.77E-15 | 0 | 0 | 27 | 80 | 1/1 | NC | 1/1 | missing<br>GT | match | missing<br>GT |
| 108971 | TruSeqV2    | 3:38365550 | intergenic | T/T | 1.11E-15 | 0 | 0 | 39 | 99 | 0/0 | NC | 0/0 | missing<br>GT | match | missing<br>GT |
| 115239 | TruSeqV2    | 3:38365550 | intergenic | G/T | 3.77E-15 | 0 | 0 | 29 | 99 | 0/1 | NC | 0/1 | missing<br>GT | match | missing<br>GT |
| 108971 | TruSeqV2    | 3:38365841 | intergenic | C/C | 2.22E-16 | 0 | 0 | 52 | 99 | 0/0 | NC | 0/0 | missing<br>GT | match | missing<br>GT |
| 132306 | Agilent38MB | 3:38365841 | intergenic | C/C | 1.55E-15 | 0 | 0 | 33 | 93 | 0/0 | NC | 0/0 | missing<br>GT | match | missing<br>GT |
| 163383 | TruSeqV2    | 3:38365841 | intergenic | C/C | 1.11E-15 | 0 | 0 | 40 | 99 | 0/0 | NC | 0/0 | missing<br>GT | match | missing<br>GT |
| 198564 | Agilent38MB | 3:38365841 | intergenic | C/C | 1.33E-15 | 0 | 0 | 46 | 99 | 0/0 | NC | 0/0 | missing<br>GT | match | missing<br>GT |
| 132306 | Agilent38MB | 3:38367984 | intergenic | A/G | 6.66E-16 | 0 | 0 | 33 | 99 | 0/1 | NC | 0/1 | missing<br>GT | match | missing<br>GT |
| 108971 | TruSeqV2    | 3:42921827 | intergenic | C/C | 2.22E-16 | 0 | 0 | 48 | 99 | 0/0 | NC | 0/0 | missing<br>GT | match | missing<br>GT |
| 115239 | TruSeqV2    | 3:42921827 | intergenic | C/C | 2.22E-16 | 0 | 0 | 40 | 99 | 0/0 | NC | 0/0 | missing<br>GT | match | missing<br>GT |
| 132306 | Agilent38MB | 3:42921827 | intergenic | C/C | 4.44E-16 | 0 | 0 | 42 | 99 | 0/0 | NC | 0/0 | missing<br>GT | match | missing<br>GT |
| 163383 | TruSeqV2    | 3:42921827 | intergenic | C/C | 2.22E-16 | 0 | 0 | 41 | 99 | 0/0 | NC | 0/0 | missing<br>GT | match | missing<br>GT |

|        |             |            |            |     |          |   |   |    |    |     |    |     |               |       |               |
|--------|-------------|------------|------------|-----|----------|---|---|----|----|-----|----|-----|---------------|-------|---------------|
| 198564 | Agilent38MB | 3:42921827 | intergenic | C/C | 2.22E-16 | 0 | 0 | 52 | 99 | 0/0 | NC | 0/0 | missing<br>GT | match | missing<br>GT |
| 108971 | TruSeqV2    | 3:42921915 | intergenic | A/A | 2.22E-16 | 0 | 0 | 40 | 99 | 0/0 | NC | 0/0 | missing<br>GT | match | missing<br>GT |
| 115239 | TruSeqV2    | 3:42921915 | intergenic | A/A | 2.22E-16 | 0 | 0 | 16 | 34 | 0/0 | NC | 0/0 | missing<br>GT | match | missing<br>GT |
| 132306 | Agilent38MB | 3:42921915 | intergenic | A/A | 2.22E-16 | 0 | 0 | 20 | 45 | 0/0 | NC | 0/0 | missing<br>GT | match | missing<br>GT |
| 163383 | TruSeqV2    | 3:42921915 | intergenic | A/A | 2.22E-16 | 0 | 0 | 29 | 63 | 0/0 | NC | 0/0 | missing<br>GT | match | missing<br>GT |
| 198564 | Agilent38MB | 3:42921915 | intergenic | A/A | 2.47E-13 | 0 | 0 | 41 | 96 | 0/0 | NC | 0/0 | missing<br>GT | match | missing<br>GT |
| 108971 | TruSeqV2    | 3:42922473 | intergenic | G/G | 6.66E-16 | 0 | 0 | 41 | 99 | 0/0 | NC | 0/0 | missing<br>GT | match | missing<br>GT |
| 115239 | TruSeqV2    | 3:42922473 | intergenic | G/G | 1.71E-14 | 0 | 0 | 5  | 15 | 0/0 | NC | 0/0 | missing<br>GT | match | missing<br>GT |
| 132306 | Agilent38MB | 3:42922473 | intergenic | G/G | 4.22E-15 | 0 | 0 | 21 | 60 | 0/0 | NC | 0/0 | missing<br>GT | match | missing<br>GT |
| 163383 | TruSeqV2    | 3:42922473 | intergenic | G/G | 4.66E-15 | 0 | 0 | 24 | 66 | 0/0 | NC | 0/0 | missing<br>GT | match | missing<br>GT |
| 198564 | Agilent38MB | 3:42922473 | intergenic | G/G | 9.77E-15 | 0 | 0 | 36 | 84 | 0/0 | NC | 0/0 | missing<br>GT | match | missing<br>GT |
| 108971 | TruSeqV2    | 3:42922697 | intergenic | G/G | 6.66E-16 | 0 | 0 | 37 | 99 | 0/0 | NC | 0/0 | missing<br>GT | match | missing<br>GT |
| 115239 | TruSeqV2    | 3:42922697 | intergenic | T/G | 4.44E-16 | 0 | 0 | 16 | 99 | 0/1 | NC | 0/1 | missing<br>GT | match | missing<br>GT |
| 163383 | TruSeqV2    | 3:42922697 | intergenic | T/G | 4.44E-16 | 0 | 0 | 40 | 99 | 0/1 | NC | 0/1 | missing<br>GT | match | missing<br>GT |
| 108971 | TruSeqV2    | 3:42923776 | intergenic | G/G | 1.11E-15 | 0 | 0 | 30 | 84 | 0/0 | NC | 0/0 | missing<br>GT | match | missing<br>GT |
| 115239 | TruSeqV2    | 3:42923776 | intergenic | T/G | 6.66E-16 | 0 | 0 | 28 | 99 | 0/1 | NC | 0/1 | missing<br>GT | match | missing<br>GT |
| 132306 | Agilent38MB | 3:42923776 | intergenic | G/G | 8.88E-16 | 0 | 0 | 32 | 78 | 0/0 | NC | 0/0 | missing<br>GT | match | missing<br>GT |
| 163383 | TruSeqV2    | 3:42923776 | intergenic | T/G | 8.88E-16 | 0 | 0 | 26 | 99 | 0/1 | NC | 0/1 | missing<br>GT | match | missing<br>GT |
| 198564 | Agilent38MB | 3:42923776 | intergenic | G/G | 1.11E-15 | 0 | 0 | 51 | 99 | 0/0 | NC | 0/0 | missing<br>GT | match | missing<br>GT |

|        |             |             |          |     |          |   |   |    |    |     |    |     |               |       |               |
|--------|-------------|-------------|----------|-----|----------|---|---|----|----|-----|----|-----|---------------|-------|---------------|
| 108971 | TruSeqV2    | 4:100010010 | promoter | T/C | 6.00E-15 | 0 | 0 | 12 | 99 | 0/1 | NC | 0/1 | missing<br>GT | match | missing<br>GT |
| 115239 | TruSeqV2    | 4:100010010 | promoter | T/T | 2.66E-15 | 0 | 0 | 11 | 33 | 1/1 | NC | 1/1 | missing<br>GT | match | missing<br>GT |
| 132306 | Agilent38MB | 4:100010010 | promoter | T/C | 1.33E-15 | 0 | 0 | 5  | 22 | 0/1 | NC | 0/1 | missing<br>GT | match | missing<br>GT |
| 163383 | TruSeqV2    | 4:100010010 | promoter | T/T | 5.11E-15 | 0 | 0 | 11 | 33 | 1/1 | NC | 1/1 | missing<br>GT | match | missing<br>GT |
| 108971 | TruSeqV2    | 4:100010273 | promoter | C/C | 1.11E-15 | 0 | 0 | 29 | 78 | 0/0 | NC | 0/0 | missing<br>GT | match | missing<br>GT |
| 115239 | TruSeqV2    | 4:100010273 | promoter | C/C | 6.66E-16 | 0 | 0 | 32 | 84 | 0/0 | NC | 0/0 | missing<br>GT | match | missing<br>GT |
| 132306 | Agilent38MB | 4:100010273 | promoter | C/C | 4.44E-16 | 0 | 0 | 24 | 63 | 0/0 | NC | 0/0 | missing<br>GT | match | missing<br>GT |
| 163383 | TruSeqV2    | 4:100010273 | promoter | G/G | 9.00E-13 | 0 | 0 | 27 | 80 | 1/1 | NC | 1/1 | missing<br>GT | match | missing<br>GT |
| 198564 | Agilent38MB | 4:100010273 | promoter | C/C | 9.10E-15 | 0 | 0 | 29 | 78 | 0/0 | NC | 0/0 | missing<br>GT | match | missing<br>GT |
| 108971 | TruSeqV2    | 4:100014342 | promoter | G/G | 8.88E-16 | 0 | 0 | 39 | 93 | 0/0 | NC | 0/0 | missing<br>GT | match | missing<br>GT |
| 115239 | TruSeqV2    | 4:100014342 | promoter | G/G | 5.11E-15 | 0 | 0 | 46 | 99 | 0/0 | NC | 0/0 | missing<br>GT | match | missing<br>GT |
| 132306 | Agilent38MB | 4:100014342 | promoter | G/G | 4.44E-15 | 0 | 0 | 49 | 99 | 0/0 | NC | 0/0 | missing<br>GT | match | missing<br>GT |
| 163383 | TruSeqV2    | 4:100014342 | promoter | G/G | 3.77E-15 | 0 | 0 | 32 | 84 | 0/0 | NC | 0/0 | missing<br>GT | match | missing<br>GT |
| 108971 | TruSeqV2    | 4:100014805 | promoter | G/A | 2.22E-15 | 0 | 0 | 57 | 99 | 0/1 | NC | 0/1 | missing<br>GT | match | missing<br>GT |
| 115239 | TruSeqV2    | 4:100014805 | promoter | G/A | 2.18E-14 | 0 | 0 | 37 | 99 | 0/1 | NC | 0/1 | missing<br>GT | match | missing<br>GT |
| 132306 | Agilent38MB | 4:100014805 | promoter | G/A | 1.78E-15 | 0 | 0 | 36 | 99 | 0/1 | NC | 0/1 | missing<br>GT | match | missing<br>GT |
| 163383 | TruSeqV2    | 4:100014805 | promoter | G/G | 2.89E-15 | 0 | 0 | 33 | 99 | 1/1 | NC | 1/1 | missing<br>GT | match | missing<br>GT |
| 198564 | Agilent38MB | 4:100014805 | promoter | A/A | 5.11E-15 | 0 | 0 | 45 | 99 | 0/0 | NC | 0/0 | missing<br>GT | match | missing<br>GT |
| 108971 | TruSeqV2    | 4:100065853 | promoter | C/C | 6.66E-16 | 0 | 0 | 47 | 99 | 0/0 | NC | 0/0 | missing<br>GT | match | missing<br>GT |



|        |             |             |          |     |          |   |   |    |    |     |    |     |               |       |               |
|--------|-------------|-------------|----------|-----|----------|---|---|----|----|-----|----|-----|---------------|-------|---------------|
| 115239 | TruSeqV2    | 4:100065853 | promoter | C/C | 4.44E-16 | 0 | 0 | 45 | 99 | 0/0 | NC | 0/0 | missing<br>GT | match | missing<br>GT |
| 132306 | Agilent38MB | 4:100065853 | promoter | C/C | 4.44E-16 | 0 | 0 | 34 | 90 | 0/0 | NC | 0/0 | missing<br>GT | match | missing<br>GT |
| 163383 | TruSeqV2    | 4:100065853 | promoter | C/C | 4.44E-16 | 0 | 0 | 56 | 99 | 0/0 | NC | 0/0 | missing<br>GT | match | missing<br>GT |
| 108971 | TruSeqV2    | 4:100066084 | promoter | T/C | 2.66E-15 | 0 | 0 | 54 | 99 | 0/1 | NC | 0/1 | missing<br>GT | match | missing<br>GT |
| 115239 | TruSeqV2    | 4:100066084 | promoter | T/T | 6.00E-15 | 0 | 0 | 46 | 99 | 0/0 | NC | 0/0 | missing<br>GT | match | missing<br>GT |
| 132306 | Agilent38MB | 4:100066084 | promoter | T/C | 9.99E-15 | 0 | 0 | 46 | 99 | 0/1 | NC | 0/1 | missing<br>GT | match | missing<br>GT |
| 163383 | TruSeqV2    | 4:100066084 | promoter | T/T | 1.55E-15 | 0 | 0 | 46 | 99 | 0/0 | NC | 0/0 | missing<br>GT | match | missing<br>GT |
| 198564 | Agilent38MB | 4:100066084 | promoter | T/T | 4.66E-15 | 0 | 0 | 47 | 99 | 0/0 | NC | 0/0 | missing<br>GT | match | missing<br>GT |
| 108971 | TruSeqV2    | 4:100141240 | promoter | A/A | 2.44E-15 | 0 | 0 | 40 | 99 | 1/1 | NC | 1/1 | missing<br>GT | match | missing<br>GT |
| 115239 | TruSeqV2    | 4:100141240 | promoter | A/A | 1.11E-15 | 0 | 0 | 41 | 99 | 1/1 | NC | 1/1 | missing<br>GT | match | missing<br>GT |
| 132306 | Agilent38MB | 4:100141240 | promoter | A/A | 1.55E-15 | 0 | 0 | 38 | 99 | 1/1 | NC | 1/1 | missing<br>GT | match | missing<br>GT |
| 163383 | TruSeqV2    | 4:100141240 | promoter | G/G | 8.59E-14 | 0 | 0 | 41 | 99 | 0/0 | NC | 0/0 | missing<br>GT | match | missing<br>GT |
| 198564 | Agilent38MB | 4:100141240 | promoter | A/A | 1.33E-15 | 0 | 0 | 36 | 99 | 1/1 | NC | 1/1 | missing<br>GT | match | missing<br>GT |
| 108971 | TruSeqV2    | 4:100142302 | promoter | A/A | 1.33E-15 | 0 | 0 | 51 | 99 | 1/1 | NC | 1/1 | missing<br>GT | match | missing<br>GT |
| 115239 | TruSeqV2    | 4:100142302 | promoter | C/C | 1.33E-15 | 0 | 0 | 35 | 99 | 0/0 | NC | 0/0 | missing<br>GT | match | missing<br>GT |
| 132306 | Agilent38MB | 4:100142302 | promoter | C/A | 6.66E-16 | 0 | 0 | 36 | 99 | 0/1 | NC | 0/1 | missing<br>GT | match | missing<br>GT |
| 198564 | Agilent38MB | 4:100142302 | promoter | C/C | 8.22E-15 | 0 | 0 | 52 | 99 | 0/0 | NC | 0/0 | missing<br>GT | match | missing<br>GT |
| 108971 | TruSeqV2    | 4:100143184 | promoter | A/A | 1.55E-15 | 0 | 0 | 50 | 99 | 1/1 | NC | 1/1 | missing<br>GT | match | missing<br>GT |
| 115239 | TruSeqV2    | 4:100143184 | promoter | A/A | 5.35E-14 | 0 | 0 | 36 | 99 | 1/1 | NC | 1/1 | missing<br>GT | match | missing<br>GT |

|        |             |             |          |     |          |   |   |    |    |     |    |     |               |       |               |
|--------|-------------|-------------|----------|-----|----------|---|---|----|----|-----|----|-----|---------------|-------|---------------|
| 132306 | Agilent38MB | 4:100143184 | promoter | A/A | 2.22E-15 | 0 | 0 | 33 | 99 | 1/1 | NC | 1/1 | missing<br>GT | match | missing<br>GT |
| 163383 | TruSeqV2    | 4:100143184 | promoter | G/G | 8.19E-14 | 0 | 0 | 42 | 99 | 0/0 | NC | 0/0 | missing<br>GT | match | missing<br>GT |
| 198564 | Agilent38MB | 4:100143184 | promoter | A/A | 1.55E-15 | 0 | 0 | 35 | 99 | 1/1 | NC | 1/1 | missing<br>GT | match | missing<br>GT |
| 108971 | TruSeqV2    | 4:100194977 | 3'UTR    | G/G | 4.44E-16 | 0 | 0 | 38 | 99 | 0/0 | NC | 0/0 | missing<br>GT | match | missing<br>GT |
| 115239 | TruSeqV2    | 4:100194977 | 3'UTR    | G/A | 2.89E-15 | 0 | 0 | 41 | 99 | 0/1 | NC | 0/1 | missing<br>GT | match | missing<br>GT |
| 132306 | Agilent38MB | 4:100194977 | 3'UTR    | G/A | 4.22E-15 | 0 | 0 | 41 | 99 | 0/1 | NC | 0/1 | missing<br>GT | match | missing<br>GT |
| 163383 | TruSeqV2    | 4:100194977 | 3'UTR    | G/G | 6.66E-16 | 0 | 0 | 41 | 99 | 0/0 | NC | 0/0 | missing<br>GT | match | missing<br>GT |
| 108971 | TruSeqV2    | 4:100195815 | 3'UTR    | G/G | 4.44E-16 | 0 | 0 | 42 | 99 | 0/0 | NC | 0/0 | missing<br>GT | match | missing<br>GT |
| 115239 | TruSeqV2    | 4:100195815 | 3'UTR    | T/G | 8.88E-16 | 0 | 0 | 54 | 99 | 0/1 | NC | 0/1 | missing<br>GT | match | missing<br>GT |
| 132306 | Agilent38MB | 4:100195815 | 3'UTR    | G/G | 2.22E-16 | 0 | 0 | 38 | 99 | 0/0 | NC | 0/0 | missing<br>GT | match | missing<br>GT |
| 163383 | TruSeqV2    | 4:100195815 | 3'UTR    | G/G | 4.44E-16 | 0 | 0 | 46 | 99 | 0/0 | NC | 0/0 | missing<br>GT | match | missing<br>GT |
| 198564 | Agilent38MB | 4:100195815 | 3'UTR    | G/G | 1.11E-15 | 0 | 0 | 40 | 99 | 0/0 | NC | 0/0 | missing<br>GT | match | missing<br>GT |
| 198564 | Agilent38MB | 4:100197359 | 3'UTR    | A/A | 2.22E-16 | 0 | 0 | 36 | 87 | 0/0 | NC | 0/0 | missing<br>GT | match | missing<br>GT |
| 108971 | TruSeqV2    | 4:100204574 | intronic | G/G | 2.22E-16 | 0 | 0 | 53 | 99 | 0/0 | NC | 0/0 | missing<br>GT | match | missing<br>GT |
| 115239 | TruSeqV2    | 4:100204574 | intronic | G/G | 8.88E-16 | 0 | 0 | 45 | 99 | 0/0 | NC | 0/0 | missing<br>GT | match | missing<br>GT |
| 132306 | Agilent38MB | 4:100204574 | intronic | G/G | 4.44E-16 | 0 | 0 | 48 | 99 | 0/0 | NC | 0/0 | missing<br>GT | match | missing<br>GT |
| 163383 | TruSeqV2    | 4:100204574 | intronic | G/G | 6.66E-16 | 0 | 0 | 46 | 99 | 0/0 | NC | 0/0 | missing<br>GT | match | missing<br>GT |
| 198564 | Agilent38MB | 4:100204574 | intronic | G/G | 2.13E-14 | 0 | 0 | 47 | 99 | 0/0 | NC | 0/0 | missing<br>GT | match | missing<br>GT |
| 108971 | TruSeqV2    | 4:100217743 | promoter | C/C | 4.44E-16 | 0 | 0 | 61 | 99 | 0/0 | NC | 0/0 | missing<br>GT | match | missing<br>GT |

|        |             |             |          |     |          |   |   |    |    |     |    |     |               |       |               |
|--------|-------------|-------------|----------|-----|----------|---|---|----|----|-----|----|-----|---------------|-------|---------------|
| 115239 | TruSeqV2    | 4:100217743 | promoter | T/C | 9.33E-15 | 0 | 0 | 49 | 99 | 0/1 | NC | 0/1 | missing<br>GT | match | missing<br>GT |
| 132306 | Agilent38MB | 4:100217743 | promoter | T/C | 9.43E-13 | 0 | 0 | 30 | 99 | 0/1 | NC | 0/1 | missing<br>GT | match | missing<br>GT |
| 163383 | TruSeqV2    | 4:100217743 | promoter | C/C | 4.44E-16 | 0 | 0 | 53 | 99 | 0/0 | NC | 0/0 | missing<br>GT | match | missing<br>GT |
| 198564 | Agilent38MB | 4:100217743 | promoter | T/C | 8.88E-16 | 0 | 0 | 53 | 99 | 0/1 | NC | 0/1 | missing<br>GT | match | missing<br>GT |
| 108971 | TruSeqV2    | 4:100361787 | promoter | C/C | 8.88E-16 | 0 | 0 | 44 | 99 | 0/0 | NC | 0/0 | missing<br>GT | match | missing<br>GT |
| 115239 | TruSeqV2    | 4:100361787 | promoter | C/C | 1.11E-15 | 0 | 0 | 28 | 41 | 0/0 | NC | 0/0 | missing<br>GT | match | missing<br>GT |
| 132306 | Agilent38MB | 4:100361787 | promoter | C/C | 4.44E-16 | 0 | 0 | 37 | 99 | 0/0 | NC | 0/0 | missing<br>GT | match | missing<br>GT |
| 163383 | TruSeqV2    | 4:100361787 | promoter | C/C | 4.44E-16 | 0 | 0 | 34 | 90 | 0/0 | NC | 0/0 | missing<br>GT | match | missing<br>GT |
| 198564 | Agilent38MB | 4:100361787 | promoter | C/C | 9.55E-15 | 0 | 0 | 40 | 99 | 0/0 | NC | 0/0 | missing<br>GT | match | missing<br>GT |
| 108971 | TruSeqV2    | 4:69415555  | intronic | C/C | 8.00E-13 | 0 | 0 | 53 | 99 | 1/1 | NC | 1/1 | missing<br>GT | match | missing<br>GT |
| 115239 | TruSeqV2    | 4:69415555  | intronic | C/C | 1.27E-14 | 0 | 0 | 21 | 25 | 1/1 | NC | 1/1 | missing<br>GT | match | missing<br>GT |
| 132306 | Agilent38MB | 4:69415555  | intronic | C/C | 3.51E-14 | 0 | 0 | 21 | 63 | 1/1 | NC | 1/1 | missing<br>GT | match | missing<br>GT |
| 163383 | TruSeqV2    | 4:69415555  | intronic | C/C | 1.35E-13 | 0 | 0 | 49 | 99 | 1/1 | NC | 1/1 | missing<br>GT | match | missing<br>GT |
| 198564 | Agilent38MB | 4:69415555  | intronic | T/T | 1.29E-14 | 0 | 0 | 25 | 63 | 0/0 | NC | 0/0 | missing<br>GT | match | missing<br>GT |
| 108971 | TruSeqV2    | 4:69420232  | intronic | A/A | 4.44E-15 | 0 | 0 | 42 | 99 | 0/0 | NC | 0/0 | missing<br>GT | match | missing<br>GT |
| 115239 | TruSeqV2    | 4:69420232  | intronic | A/A | 3.55E-15 | 0 | 0 | 19 | 51 | 0/0 | NC | 0/0 | missing<br>GT | match | missing<br>GT |
| 132306 | Agilent38MB | 4:69420232  | intronic | A/A | 4.44E-16 | 0 | 0 | 17 | 45 | 0/0 | NC | 0/0 | missing<br>GT | match | missing<br>GT |
| 163383 | TruSeqV2    | 4:69420232  | intronic | A/A | 7.75E-14 | 0 | 0 | 34 | 90 | 0/0 | NC | 0/0 | missing<br>GT | match | missing<br>GT |
| 198564 | Agilent38MB | 4:69420232  | intronic | G/G | 1.36E-13 | 0 | 0 | 19 | 57 | 1/1 | NC | 1/1 | missing<br>GT | match | missing<br>GT |

|        |             |            |          |     |          |   |   |    |    |     |    |     |               |       |               |
|--------|-------------|------------|----------|-----|----------|---|---|----|----|-----|----|-----|---------------|-------|---------------|
| 132306 | Agilent38MB | 4:69512637 | 3'UTR    | T/T | 5.55E-14 | 0 | 0 | 45 | 30 | 0/0 | NC | 0/0 | missing<br>GT | match | missing<br>GT |
| 198564 | Agilent38MB | 4:69512637 | 3'UTR    | T/T | 3.77E-15 | 0 | 0 | 40 | 12 | 0/0 | NC | 0/0 | missing<br>GT | match | missing<br>GT |
| 108971 | TruSeqV2    | 4:69961912 | promoter | G/G | 1.34E-12 | 0 | 0 | 55 | 99 | 1/1 | NC | 1/1 | missing<br>GT | match | missing<br>GT |
| 115239 | TruSeqV2    | 4:69961912 | promoter | A/G | 3.77E-15 | 0 | 0 | 42 | 99 | 0/1 | NC | 0/1 | missing<br>GT | match | missing<br>GT |
| 132306 | Agilent38MB | 4:69961912 | promoter | G/G | 1.61E-13 | 0 | 0 | 39 | 99 | 1/1 | NC | 1/1 | missing<br>GT | match | missing<br>GT |
| 163383 | TruSeqV2    | 4:69961912 | promoter | G/G | 1.93E-14 | 0 | 0 | 44 | 99 | 1/1 | NC | 1/1 | missing<br>GT | match | missing<br>GT |
| 132306 | Agilent38MB | 4:70345904 | 3'UTR    | T/C | 5.11E-15 | 0 | 0 | 35 | 99 | 0/1 | NC | 0/1 | missing<br>GT | match | missing<br>GT |
| 198564 | Agilent38MB | 4:70345904 | 3'UTR    | C/C | 3.44E-14 | 0 | 0 | 44 | 99 | 0/0 | NC | 0/0 | missing<br>GT | match | missing<br>GT |
| 132306 | Agilent38MB | 4:70346057 | 3'UTR    | T/T | 6.66E-16 | 0 | 0 | 44 | 99 | 0/0 | NC | 0/0 | missing<br>GT | match | missing<br>GT |
| 198564 | Agilent38MB | 4:70346057 | 3'UTR    | T/T | 1.55E-15 | 0 | 0 | 48 | 99 | 0/0 | NC | 0/0 | missing<br>GT | match | missing<br>GT |
| 198564 | Agilent38MB | 4:70346127 | 3'UTR    | A/A | 6.22E-15 | 0 | 0 | 54 | 99 | 0/0 | NC | 0/0 | missing<br>GT | match | missing<br>GT |
| 132306 | Agilent38MB | 4:70454991 | 3'UTR    | C/C | 1.11E-15 | 0 | 0 | 38 | 99 | 0/0 | NC | 0/0 | missing<br>GT | match | missing<br>GT |
| 198564 | Agilent38MB | 4:70454991 | 3'UTR    | C/C | 1.33E-15 | 0 | 0 | 44 | 99 | 0/0 | NC | 0/0 | missing<br>GT | match | missing<br>GT |
| 132306 | Agilent38MB | 4:70455478 | intronic | T/T | 6.66E-16 | 0 | 0 | 35 | 99 | 1/1 | NC | 1/1 | missing<br>GT | match | missing<br>GT |
| 198564 | Agilent38MB | 4:70455478 | intronic | T/T | 2.22E-15 | 0 | 0 | 59 | 99 | 1/1 | NC | 1/1 | missing<br>GT | match | missing<br>GT |
| 108971 | TruSeqV2    | 4:70499234 | intronic | T/T | 6.66E-16 | 0 | 0 | 47 | 99 | 0/0 | NC | 0/0 | missing<br>GT | match | missing<br>GT |
| 115239 | TruSeqV2    | 4:70499234 | intronic | T/T | 1.33E-15 | 0 | 0 | 40 | 99 | 0/0 | NC | 0/0 | missing<br>GT | match | missing<br>GT |
| 132306 | Agilent38MB | 4:70499234 | intronic | T/T | 4.44E-16 | 0 | 0 | 35 | 99 | 0/0 | NC | 0/0 | missing<br>GT | match | missing<br>GT |
| 163383 | TruSeqV2    | 4:70499234 | intronic | T/T | 4.44E-16 | 0 | 0 | 61 | 99 | 0/0 | NC | 0/0 | missing<br>GT | match | missing<br>GT |

|        |             |            |          |     |          |   |   |    |    |     |    |     |               |       |               |
|--------|-------------|------------|----------|-----|----------|---|---|----|----|-----|----|-----|---------------|-------|---------------|
| 198564 | Agilent38MB | 4:70499234 | intronic | T/C | 1.33E-15 | 0 | 0 | 34 | 99 | 0/1 | NC | 0/1 | missing<br>GT | match | missing<br>GT |
| 108971 | TruSeqV2    | 4:70602840 | intronic | C/C | 8.88E-16 | 0 | 0 | 55 | 99 | 0/0 | NC | 0/0 | missing<br>GT | match | missing<br>GT |
| 115239 | TruSeqV2    | 4:70602840 | intronic | C/C | 6.66E-16 | 0 | 0 | 47 | 99 | 0/0 | NC | 0/0 | missing<br>GT | match | missing<br>GT |
| 132306 | Agilent38MB | 4:70602840 | intronic | C/C | 8.88E-16 | 0 | 0 | 28 | 81 | 0/0 | NC | 0/0 | missing<br>GT | match | missing<br>GT |
| 163383 | TruSeqV2    | 4:70602840 | intronic | C/C | 1.33E-15 | 0 | 0 | 50 | 99 | 0/0 | NC | 0/0 | missing<br>GT | match | missing<br>GT |
| 198564 | Agilent38MB | 4:70602840 | intronic | T/C | 1.11E-15 | 0 | 0 | 52 | 99 | 0/1 | NC | 0/1 | missing<br>GT | match | missing<br>GT |
| 108971 | TruSeqV2    | 4:70606026 | intronic | A/A | 4.22E-15 | 0 | 0 | 37 | 99 | 0/0 | NC | 0/0 | missing<br>GT | match | missing<br>GT |
| 115239 | TruSeqV2    | 4:70606026 | intronic | G/A | 3.55E-15 | 0 | 0 | 42 | 99 | 0/1 | NC | 0/1 | missing<br>GT | match | missing<br>GT |
| 132306 | Agilent38MB | 4:70606026 | intronic | A/A | 1.71E-14 | 0 | 0 | 33 | 87 | 0/0 | NC | 0/0 | missing<br>GT | match | missing<br>GT |
| 163383 | TruSeqV2    | 4:70606026 | intronic | G/A | 6.66E-16 | 0 | 0 | 49 | 99 | 0/1 | NC | 0/1 | missing<br>GT | match | missing<br>GT |
| 198564 | Agilent38MB | 4:70606026 | intronic | G/A | 1.11E-15 | 0 | 0 | 42 | 99 | 0/1 | NC | 0/1 | missing<br>GT | match | missing<br>GT |
| 108971 | TruSeqV2    | 4:70611119 | intronic | A/A | 3.55E-15 | 0 | 0 | 60 | 99 | 0/0 | NC | 0/0 | missing<br>GT | match | missing<br>GT |
| 115239 | TruSeqV2    | 4:70611119 | intronic | A/A | 3.33E-15 | 0 | 0 | 53 | 99 | 0/0 | NC | 0/0 | missing<br>GT | match | missing<br>GT |
| 132306 | Agilent38MB | 4:70611119 | intronic | A/A | 1.33E-15 | 0 | 0 | 49 | 99 | 0/0 | NC | 0/0 | missing<br>GT | match | missing<br>GT |
| 163383 | TruSeqV2    | 4:70611119 | intronic | G/A | 1.33E-15 | 0 | 0 | 44 | 99 | 0/1 | NC | 0/1 | missing<br>GT | match | missing<br>GT |
| 198564 | Agilent38MB | 4:70611119 | intronic | G/A | 6.66E-16 | 0 | 0 | 35 | 99 | 0/1 | NC | 0/1 | missing<br>GT | match | missing<br>GT |
| 132306 | Agilent38MB | 4:70621074 | promoter | G/A | 2.00E-15 | 0 | 0 | 38 | 99 | 0/1 | NC | 0/1 | missing<br>GT | match | missing<br>GT |
| 108971 | TruSeqV2    | 4:70723840 | intronic | C/C | 6.88E-15 | 0 | 0 | 63 | 99 | 0/0 | NC | 0/0 | missing<br>GT | match | missing<br>GT |
| 115239 | TruSeqV2    | 4:70723840 | intronic | T/T | 1.11E-15 | 0 | 0 | 50 | 99 | 1/1 | NC | 1/1 | missing<br>GT | match | missing<br>GT |

|        |             |            |          |     |          |   |   |    |    |     |    |     |               |       |               |
|--------|-------------|------------|----------|-----|----------|---|---|----|----|-----|----|-----|---------------|-------|---------------|
| 132306 | Agilent38MB | 4:70723840 | intronic | T/C | 4.22E-15 | 0 | 0 | 41 | 99 | 0/1 | NC | 0/1 | missing<br>GT | match | missing<br>GT |
| 163383 | TruSeqV2    | 4:70723840 | intronic | T/T | 1.11E-15 | 0 | 0 | 47 | 99 | 1/1 | NC | 1/1 | missing<br>GT | match | missing<br>GT |
| 198564 | Agilent38MB | 4:70723840 | intronic | T/T | 1.33E-15 | 0 | 0 | 52 | 99 | 1/1 | NC | 1/1 | missing<br>GT | match | missing<br>GT |
| 108971 | TruSeqV2    | 4:70724053 | intronic | T/T | 2.22E-16 | 0 | 0 | 52 | 99 | 0/0 | NC | 0/0 | missing<br>GT | match | missing<br>GT |
| 115239 | TruSeqV2    | 4:70724053 | intronic | T/T | 2.22E-16 | 0 | 0 | 47 | 99 | 0/0 | NC | 0/0 | missing<br>GT | match | missing<br>GT |
| 163383 | TruSeqV2    | 4:70724053 | intronic | T/T | 2.22E-16 | 0 | 0 | 44 | 99 | 0/0 | NC | 0/0 | missing<br>GT | match | missing<br>GT |
| 108971 | TruSeqV2    | 4:70724270 | intronic | C/C | 1.11E-15 | 0 | 0 | 42 | 99 | 0/0 | NC | 0/0 | missing<br>GT | match | missing<br>GT |
| 132306 | Agilent38MB | 4:70724270 | intronic | T/C | 6.66E-15 | 0 | 0 | 34 | 99 | 0/1 | NC | 0/1 | missing<br>GT | match | missing<br>GT |
| 163383 | TruSeqV2    | 4:70724270 | intronic | T/C | 6.66E-15 | 0 | 0 | 38 | 99 | 0/1 | NC | 0/1 | missing<br>GT | match | missing<br>GT |
| 198564 | Agilent38MB | 4:70724270 | intronic | T/C | 9.33E-15 | 0 | 0 | 40 | 99 | 0/1 | NC | 0/1 | missing<br>GT | match | missing<br>GT |
| 115239 | TruSeqV2    | 4:70725456 | intronic | C/C | 1.78E-15 | 0 | 0 | 23 | 69 | 1/1 | NC | 1/1 | missing<br>GT | match | missing<br>GT |
| 132306 | Agilent38MB | 4:70725456 | intronic | G/C | 1.20E-14 | 0 | 0 | 42 | 99 | 0/1 | NC | 0/1 | missing<br>GT | match | missing<br>GT |
| 198564 | Agilent38MB | 4:70725456 | intronic | C/C | 1.04E-14 | 0 | 0 | 43 | 99 | 1/1 | NC | 1/1 | missing<br>GT | match | missing<br>GT |
| 132306 | Agilent38MB | 4:70725821 | 5'UTR    | T/C | 5.33E-15 | 0 | 0 | 44 | 99 | 0/1 | NC | 0/1 | missing<br>GT | match | missing<br>GT |
| 198564 | Agilent38MB | 4:70725821 | 5'UTR    | C/C | 8.88E-16 | 0 | 0 | 53 | 99 | 0/0 | NC | 0/0 | missing<br>GT | match | missing<br>GT |
| 132306 | Agilent38MB | 4:71895260 | 3'UTR    | T/T | 8.88E-16 | 0 | 0 | 39 | 99 | 1/1 | NC | 1/1 | missing<br>GT | match | missing<br>GT |
| 198564 | Agilent38MB | 4:71895260 | 3'UTR    | T/T | 3.33E-15 | 0 | 0 | 42 | 99 | 1/1 | NC | 1/1 | missing<br>GT | match | missing<br>GT |
| 108971 | TruSeqV2    | 4:74269645 | promoter | G/G | 3.77E-15 | 0 | 0 | 28 | 72 | 0/0 | NC | 0/0 | missing<br>GT | match | missing<br>GT |
| 115239 | TruSeqV2    | 4:74269645 | promoter | G/G | 5.77E-15 | 0 | 0 | 47 | 98 | 0/0 | NC | 0/0 | missing<br>GT | match | missing<br>GT |

|        |             |             |          |     |          |   |   |    |    |     |    |     |               |       |               |
|--------|-------------|-------------|----------|-----|----------|---|---|----|----|-----|----|-----|---------------|-------|---------------|
| 132306 | Agilent38MB | 4:74269645  | promoter | A/G | 3.77E-15 | 0 | 0 | 40 | 99 | 0/1 | NC | 0/1 | missing<br>GT | match | missing<br>GT |
| 163383 | TruSeqV2    | 4:74269645  | promoter | G/G | 3.33E-15 | 0 | 0 | 32 | 84 | 0/0 | NC | 0/0 | missing<br>GT | match | missing<br>GT |
| 198564 | Agilent38MB | 4:74269645  | promoter | A/G | 2.73E-14 | 0 | 0 | 44 | 99 | 0/1 | NC | 0/1 | missing<br>GT | match | missing<br>GT |
| 132306 | Agilent38MB | 5:131730807 | 3'UTR    | C/C | 2.30E-13 | 0 | 0 | 46 | 99 | 1/1 | NC | 1/1 | missing<br>GT | match | missing<br>GT |
| 198564 | Agilent38MB | 5:131730807 | 3'UTR    | C/C | 5.65E-12 | 0 | 0 | 37 | 99 | 1/1 | NC | 1/1 | missing<br>GT | match | missing<br>GT |
| 132306 | Agilent38MB | 5:142659266 | 3'UTR    | T/T | 1.55E-15 | 0 | 0 | 44 | 99 | 0/0 | NC | 0/0 | missing<br>GT | match | missing<br>GT |
| 198564 | Agilent38MB | 5:142659266 | 3'UTR    | T/T | 4.44E-16 | 0 | 0 | 38 | 99 | 0/0 | NC | 0/0 | missing<br>GT | match | missing<br>GT |
| 132306 | Agilent38MB | 5:142659748 | 3'UTR    | C/C | 2.22E-16 | 0 | 0 | 33 | 96 | 0/0 | NC | 0/0 | missing<br>GT | match | missing<br>GT |
| 132306 | Agilent38MB | 5:142660229 | 3'UTR    | A/A | 6.66E-16 | 0 | 0 | 35 | 96 | 0/0 | NC | 0/0 | missing<br>GT | match | missing<br>GT |
| 198564 | Agilent38MB | 5:142660229 | 3'UTR    | A/A | 1.11E-15 | 0 | 0 | 47 | 99 | 0/0 | NC | 0/0 | missing<br>GT | match | missing<br>GT |
| 115239 | TruSeqV2    | 5:74633716  | intronic | G/G | 6.66E-16 | 0 | 0 | 32 | 52 | 0/0 | NC | 0/0 | missing<br>GT | match | missing<br>GT |
| 132306 | Agilent38MB | 5:74633716  | intronic | G/G | 2.00E-15 | 0 | 0 | 31 | 72 | 0/0 | NC | 0/0 | missing<br>GT | match | missing<br>GT |
| 163383 | TruSeqV2    | 5:74633716  | intronic | G/G | 4.44E-16 | 0 | 0 | 31 | 92 | 0/0 | NC | 0/0 | missing<br>GT | match | missing<br>GT |
| 198564 | Agilent38MB | 5:74633716  | intronic | G/G | 3.33E-15 | 0 | 0 | 41 | 99 | 0/0 | NC | 0/0 | missing<br>GT | match | missing<br>GT |
| 163383 | TruSeqV2    | 5:74639259  | intronic | G/G | 2.22E-16 | 0 | 0 | 29 | 87 | 1/1 | NC | 1/1 | missing<br>GT | match | missing<br>GT |
| 115239 | TruSeqV2    | 6:160769811 | synon    | T/T | 6.35E-07 | 0 | 0 | 3  | 9  | 1/1 | NC | 1/1 | missing<br>GT | match | missing<br>GT |
| 163383 | TruSeqV2    | 6:160769811 | synon    | T/T | 1.26E-12 | 0 | 0 | 17 | 51 | 1/1 | NC | 1/1 | missing<br>GT | match | missing<br>GT |
| 198564 | Agilent38MB | 6:32008648  | missense | C/C | 2.78E-08 | 0 | 0 | 21 | 51 | 0/0 | NC | 0/0 | missing<br>GT | match | missing<br>GT |
| 132306 | Agilent38MB | 6:32008696  | missense | G/G | 1.11E-15 | 0 | 0 | 4  | 6  | 0/0 | NC | 0/0 | missing<br>GT | match | missing<br>GT |

|        |             |            |          |     |          |   |   |    |    |     |    |     |               |       |               |
|--------|-------------|------------|----------|-----|----------|---|---|----|----|-----|----|-----|---------------|-------|---------------|
| 198564 | Agilent38MB | 6:32008696 | missense | G/G | 1.47E-13 | 0 | 0 | 8  | 15 | 0/0 | NC | 0/0 | missing<br>GT | match | missing<br>GT |
| 108971 | TruSeqV2    | 6:35311988 | intronic | G/G | 4.44E-16 | 0 | 0 | 54 | 99 | 0/0 | NC | 0/0 | missing<br>GT | match | missing<br>GT |
| 115239 | TruSeqV2    | 6:35311988 | intronic | G/G | 1.78E-15 | 0 | 0 | 25 | 72 | 0/0 | NC | 0/0 | missing<br>GT | match | missing<br>GT |
| 132306 | Agilent38MB | 6:35311988 | intronic | G/G | 1.58E-14 | 0 | 0 | 37 | 99 | 0/0 | NC | 0/0 | missing<br>GT | match | missing<br>GT |
| 163383 | TruSeqV2    | 6:35311988 | intronic | G/G | 1.49E-14 | 0 | 0 | 42 | 99 | 0/0 | NC | 0/0 | missing<br>GT | match | missing<br>GT |
| 108971 | TruSeqV2    | 6:35312254 | intronic | G/G | 4.44E-16 | 0 | 0 | 43 | 99 | 0/0 | NC | 0/0 | missing<br>GT | match | missing<br>GT |
| 115239 | TruSeqV2    | 6:35312254 | intronic | G/G | 4.44E-16 | 0 | 0 | 32 | 78 | 0/0 | NC | 0/0 | missing<br>GT | match | missing<br>GT |
| 108971 | TruSeqV2    | 6:35317301 | intronic | C/C | 6.66E-15 | 0 | 0 | 36 | 99 | 0/0 | NC | 0/0 | missing<br>GT | match | missing<br>GT |
| 115239 | TruSeqV2    | 6:35317301 | intronic | C/C | 4.44E-16 | 0 | 0 | 31 | 15 | 0/0 | NC | 0/0 | missing<br>GT | match | missing<br>GT |
| 132306 | Agilent38MB | 6:35317301 | intronic | C/C | 6.66E-16 | 0 | 0 | 25 | 72 | 0/0 | NC | 0/0 | missing<br>GT | match | missing<br>GT |
| 163383 | TruSeqV2    | 6:35317301 | intronic | C/C | 2.66E-15 | 0 | 0 | 31 | 78 | 0/0 | NC | 0/0 | missing<br>GT | match | missing<br>GT |
| 108971 | TruSeqV2    | 6:35318784 | intronic | G/G | 6.66E-16 | 0 | 0 | 65 | 99 | 0/0 | NC | 0/0 | missing<br>GT | match | missing<br>GT |
| 115239 | TruSeqV2    | 6:35318784 | intronic | G/G | 7.33E-15 | 0 | 0 | 34 | 87 | 0/0 | NC | 0/0 | missing<br>GT | match | missing<br>GT |
| 132306 | Agilent38MB | 6:35318784 | intronic | G/G | 8.88E-16 | 0 | 0 | 47 | 99 | 0/0 | NC | 0/0 | missing<br>GT | match | missing<br>GT |
| 163383 | TruSeqV2    | 6:35318784 | intronic | G/G | 6.66E-16 | 0 | 0 | 49 | 99 | 0/0 | NC | 0/0 | missing<br>GT | match | missing<br>GT |
| 198564 | Agilent38MB | 6:35318784 | intronic | G/G | 3.04E-14 | 0 | 0 | 53 | 99 | 0/0 | NC | 0/0 | missing<br>GT | match | missing<br>GT |
| 108971 | TruSeqV2    | 6:35320447 | intronic | C/C | 2.22E-16 | 0 | 0 | 42 | 99 | 0/0 | NC | 0/0 | missing<br>GT | match | missing<br>GT |
| 115239 | TruSeqV2    | 6:35320447 | intronic | C/C | 2.22E-16 | 0 | 0 | 21 | 57 | 0/0 | NC | 0/0 | missing<br>GT | match | missing<br>GT |
| 163383 | TruSeqV2    | 6:35320447 | intronic | C/C | 2.22E-16 | 0 | 0 | 27 | 65 | 0/0 | NC | 0/0 | missing<br>GT | match | missing<br>GT |



|        |             |            |          |     |          |   |   |    |    |     |    |     |               |       |               |
|--------|-------------|------------|----------|-----|----------|---|---|----|----|-----|----|-----|---------------|-------|---------------|
| 108971 | TruSeqV2    | 6:35322763 | intronic | A/A | 4.22E-15 | 0 | 0 | 53 | 99 | 0/0 | NC | 0/0 | missing<br>GT | match | missing<br>GT |
| 115239 | TruSeqV2    | 6:35322763 | intronic | A/A | 5.68E-12 | 0 | 0 | 32 | 52 | 0/0 | NC | 0/0 | missing<br>GT | match | missing<br>GT |
| 132306 | Agilent38MB | 6:35322763 | intronic | A/A | 4.24E-13 | 0 | 0 | 33 | 99 | 0/0 | NC | 0/0 | missing<br>GT | match | missing<br>GT |
| 163383 | TruSeqV2    | 6:35322763 | intronic | A/A | 3.13E-14 | 0 | 0 | 47 | 99 | 0/0 | NC | 0/0 | missing<br>GT | match | missing<br>GT |
| 198564 | Agilent38MB | 6:35322763 | intronic | A/A | 3.29E-14 | 0 | 0 | 52 | 99 | 0/0 | NC | 0/0 | missing<br>GT | match | missing<br>GT |
| 108971 | TruSeqV2    | 6:35322975 | intronic | A/A | 4.87E-13 | 0 | 0 | 56 | 99 | 0/0 | NC | 0/0 | missing<br>GT | match | missing<br>GT |
| 115239 | TruSeqV2    | 6:35322975 | intronic | A/A | 1.55E-14 | 0 | 0 | 19 | 0  | 0/0 | NC | 0/0 | missing<br>GT | match | missing<br>GT |
| 163383 | TruSeqV2    | 6:35322975 | intronic | A/A | 6.22E-15 | 0 | 0 | 35 | 84 | 0/0 | NC | 0/0 | missing<br>GT | match | missing<br>GT |
| 198564 | Agilent38MB | 6:35322975 | intronic | A/A | 4.44E-16 | 0 | 0 | 50 | 99 | 0/0 | NC | 0/0 | missing<br>GT | match | missing<br>GT |
| 108971 | TruSeqV2    | 6:35324741 | intronic | T/T | 6.66E-16 | 0 | 0 | 45 | 99 | 0/0 | NC | 0/0 | missing<br>GT | match | missing<br>GT |
| 163383 | TruSeqV2    | 6:35324741 | intronic | T/T | 1.33E-15 | 0 | 0 | 51 | 99 | 0/0 | NC | 0/0 | missing<br>GT | match | missing<br>GT |
| 198564 | Agilent38MB | 6:35324741 | intronic | T/T | 2.00E-15 | 0 | 0 | 54 | 99 | 0/0 | NC | 0/0 | missing<br>GT | match | missing<br>GT |
| 108971 | TruSeqV2    | 6:35325718 | intronic | C/C | 2.22E-16 | 0 | 0 | 49 | 99 | 0/0 | NC | 0/0 | missing<br>GT | match | missing<br>GT |
| 115239 | TruSeqV2    | 6:35325718 | intronic | C/C | 1.11E-15 | 0 | 0 | 38 | 99 | 0/0 | NC | 0/0 | missing<br>GT | match | missing<br>GT |
| 132306 | Agilent38MB | 6:35325718 | intronic | C/C | 6.66E-16 | 0 | 0 | 40 | 99 | 0/0 | NC | 0/0 | missing<br>GT | match | missing<br>GT |
| 163383 | TruSeqV2    | 6:35325718 | intronic | C/C | 4.44E-16 | 0 | 0 | 30 | 87 | 0/0 | NC | 0/0 | missing<br>GT | match | missing<br>GT |
| 198564 | Agilent38MB | 6:35325718 | intronic | C/C | 6.66E-16 | 0 | 0 | 44 | 99 | 0/0 | NC | 0/0 | missing<br>GT | match | missing<br>GT |
| 108971 | TruSeqV2    | 6:35330030 | intronic | T/T | 2.66E-15 | 0 | 0 | 39 | 96 | 0/0 | NC | 0/0 | missing<br>GT | match | missing<br>GT |
| 115239 | TruSeqV2    | 6:35330030 | intronic | T/T | 1.78E-14 | 0 | 0 | 38 | 26 | 0/0 | NC | 0/0 | missing<br>GT | match | missing<br>GT |

|        |             |            |          |     |          |   |   |    |    |     |    |     |               |       |               |
|--------|-------------|------------|----------|-----|----------|---|---|----|----|-----|----|-----|---------------|-------|---------------|
| 108971 | TruSeqV2    | 6:35330898 | intronic | T/T | 3.42E-14 | 0 | 0 | 40 | 99 | 0/0 | NC | 0/0 | missing<br>GT | match | missing<br>GT |
| 115239 | TruSeqV2    | 6:35330898 | intronic | T/T | 8.88E-16 | 0 | 0 | 43 | 99 | 0/0 | NC | 0/0 | missing<br>GT | match | missing<br>GT |
| 163383 | TruSeqV2    | 6:35330898 | intronic | T/T | 1.78E-15 | 0 | 0 | 38 | 99 | 0/0 | NC | 0/0 | missing<br>GT | match | missing<br>GT |
| 198564 | Agilent38MB | 6:35330898 | intronic | T/T | 7.20E-13 | 0 | 0 | 38 | 96 | 0/0 | NC | 0/0 | missing<br>GT | match | missing<br>GT |
| 108971 | TruSeqV2    | 6:35335290 | intronic | G/G | 1.33E-15 | 0 | 0 | 50 | 99 | 0/0 | NC | 0/0 | missing<br>GT | match | missing<br>GT |
| 115239 | TruSeqV2    | 6:35335290 | intronic | G/G | 2.66E-15 | 0 | 0 | 37 | 99 | 0/0 | NC | 0/0 | missing<br>GT | match | missing<br>GT |
| 132306 | Agilent38MB | 6:35335290 | intronic | G/G | 6.66E-16 | 0 | 0 | 36 | 99 | 0/0 | NC | 0/0 | missing<br>GT | match | missing<br>GT |
| 163383 | TruSeqV2    | 6:35335290 | intronic | G/G | 3.11E-15 | 0 | 0 | 33 | 81 | 0/0 | NC | 0/0 | missing<br>GT | match | missing<br>GT |
| 198564 | Agilent38MB | 6:35335290 | intronic | G/G | 9.95E-14 | 0 | 0 | 38 | 99 | 0/0 | NC | 0/0 | missing<br>GT | match | missing<br>GT |
| 108971 | TruSeqV2    | 6:35337958 | intronic | T/T | 6.19E-05 | 0 | 0 | 36 | 99 | 0/0 | NC | 0/0 | missing<br>GT | match | missing<br>GT |
| 115239 | TruSeqV2    | 6:35337958 | intronic | T/T | 3.03E-06 | 0 | 0 | 31 | 72 | 0/0 | NC | 0/0 | missing<br>GT | match | missing<br>GT |
| 132306 | Agilent38MB | 6:35337958 | intronic | T/T | 7.80E-10 | 0 | 0 | 44 | 99 | 0/0 | NC | 0/0 | missing<br>GT | match | missing<br>GT |
| 163383 | TruSeqV2    | 6:35337958 | intronic | T/T | 5.67E-07 | 0 | 0 | 32 | 87 | 0/0 | NC | 0/0 | missing<br>GT | match | missing<br>GT |
| 198564 | Agilent38MB | 6:35337958 | intronic | T/T | 3.53E-09 | 0 | 0 | 38 | 99 | 0/0 | NC | 0/0 | missing<br>GT | match | missing<br>GT |
| 108971 | TruSeqV2    | 6:35338106 | intronic | C/C | 5.33E-15 | 0 | 0 | 48 | 99 | 0/0 | NC | 0/0 | missing<br>GT | match | missing<br>GT |
| 115239 | TruSeqV2    | 6:35338106 | intronic | C/C | 4.22E-15 | 0 | 0 | 34 | 90 | 0/0 | NC | 0/0 | missing<br>GT | match | missing<br>GT |
| 132306 | Agilent38MB | 6:35338106 | intronic | C/C | 1.11E-15 | 0 | 0 | 43 | 99 | 0/0 | NC | 0/0 | missing<br>GT | match | missing<br>GT |
| 163383 | TruSeqV2    | 6:35338106 | intronic | C/C | 1.78E-15 | 0 | 0 | 32 | 87 | 0/0 | NC | 0/0 | missing<br>GT | match | missing<br>GT |
| 108971 | TruSeqV2    | 6:35339035 | intronic | C/C | 1.55E-15 | 0 | 0 | 35 | 93 | 0/0 | NC | 0/0 | missing<br>GT | match | missing<br>GT |

|        |             |            |          |     |          |   |   |    |    |     |    |     |               |       |               |
|--------|-------------|------------|----------|-----|----------|---|---|----|----|-----|----|-----|---------------|-------|---------------|
| 115239 | TruSeqV2    | 6:35339035 | intronic | C/C | 4.44E-16 | 0 | 0 | 30 | 81 | 0/0 | NC | 0/0 | missing<br>GT | match | missing<br>GT |
| 108971 | TruSeqV2    | 6:35340894 | intronic | C/C | 4.44E-16 | 0 | 0 | 42 | 99 | 0/0 | NC | 0/0 | missing<br>GT | match | missing<br>GT |
| 115239 | TruSeqV2    | 6:35340894 | intronic | C/C | 1.78E-15 | 0 | 0 | 38 | 99 | 0/0 | NC | 0/0 | missing<br>GT | match | missing<br>GT |
| 132306 | Agilent38MB | 6:35340894 | intronic | C/C | 4.44E-16 | 0 | 0 | 40 | 99 | 0/0 | NC | 0/0 | missing<br>GT | match | missing<br>GT |
| 163383 | TruSeqV2    | 6:35340894 | intronic | C/C | 6.66E-16 | 0 | 0 | 40 | 99 | 0/0 | NC | 0/0 | missing<br>GT | match | missing<br>GT |
| 198564 | Agilent38MB | 6:35340894 | intronic | C/C | 2.22E-16 | 0 | 0 | 42 | 99 | 0/0 | NC | 0/0 | missing<br>GT | match | missing<br>GT |
| 108971 | TruSeqV2    | 6:35350042 | intronic | C/C | 5.70E-05 | 0 | 0 | 25 | 66 | 0/0 | NC | 0/0 | missing<br>GT | match | missing<br>GT |
| 132306 | Agilent38MB | 6:35350042 | intronic | C/C | 6.00E-15 | 0 | 0 | 30 | 81 | 0/0 | NC | 0/0 | missing<br>GT | match | missing<br>GT |
| 163383 | TruSeqV2    | 6:35350042 | intronic | C/C | 9.82E-12 | 0 | 0 | 18 | 54 | 0/0 | NC | 0/0 | missing<br>GT | match | missing<br>GT |
| 108971 | TruSeqV2    | 6:35350759 | intronic | G/G | 1.03E-09 | 0 | 0 | 43 | 99 | 0/0 | NC | 0/0 | missing<br>GT | match | missing<br>GT |
| 115239 | TruSeqV2    | 6:35350759 | intronic | G/G | 3.20E-08 | 0 | 0 | 32 | 81 | 0/0 | NC | 0/0 | missing<br>GT | match | missing<br>GT |
| 132306 | Agilent38MB | 6:35350759 | intronic | G/G | 1.15E-14 | 0 | 0 | 32 | 75 | 0/0 | NC | 0/0 | missing<br>GT | match | missing<br>GT |
| 163383 | TruSeqV2    | 6:35350759 | intronic | G/G | 1.29E-10 | 0 | 0 | 41 | 99 | 0/0 | NC | 0/0 | missing<br>GT | match | missing<br>GT |
| 108971 | TruSeqV2    | 6:35353523 | intronic | A/A | 2.09E-13 | 0 | 0 | 37 | 99 | 0/0 | NC | 0/0 | missing<br>GT | match | missing<br>GT |
| 115239 | TruSeqV2    | 6:35353523 | intronic | A/A | 8.82E-14 | 0 | 0 | 15 | 42 | 0/0 | NC | 0/0 | missing<br>GT | match | missing<br>GT |
| 132306 | Agilent38MB | 6:35353523 | intronic | A/A | 6.66E-16 | 0 | 0 | 23 | 48 | 0/0 | NC | 0/0 | missing<br>GT | match | missing<br>GT |
| 163383 | TruSeqV2    | 6:35353523 | intronic | A/A | 6.66E-16 | 0 | 0 | 33 | 87 | 0/0 | NC | 0/0 | missing<br>GT | match | missing<br>GT |
| 198564 | Agilent38MB | 6:35353523 | intronic | A/A | 1.27E-14 | 0 | 0 | 34 | 90 | 0/0 | NC | 0/0 | missing<br>GT | match | missing<br>GT |
| 115239 | TruSeqV2    | 6:35356161 | intronic | G/G | 1.13E-09 | 0 | 0 | 22 | 60 | 0/0 | NC | 0/0 | missing<br>GT | match | missing<br>GT |

|        |             |            |          |     |          |   |   |    |    |     |    |     |               |       |               |
|--------|-------------|------------|----------|-----|----------|---|---|----|----|-----|----|-----|---------------|-------|---------------|
| 132306 | Agilent38MB | 6:35356161 | intronic | G/G | 1.55E-15 | 0 | 0 | 33 | 96 | 0/0 | NC | 0/0 | missing<br>GT | match | missing<br>GT |
| 163383 | TruSeqV2    | 6:35356161 | intronic | G/G | 5.22E-14 | 0 | 0 | 32 | 93 | 0/0 | NC | 0/0 | missing<br>GT | match | missing<br>GT |
| 108971 | TruSeqV2    | 6:35357693 | intronic | C/C | 1.03E-13 | 0 | 0 | 40 | 99 | 0/0 | NC | 0/0 | missing<br>GT | match | missing<br>GT |
| 115239 | TruSeqV2    | 6:35357693 | intronic | C/C | 1.33E-15 | 0 | 0 | 35 | 61 | 0/0 | NC | 0/0 | missing<br>GT | match | missing<br>GT |
| 163383 | TruSeqV2    | 6:35357693 | intronic | C/C | 1.11E-15 | 0 | 0 | 27 | 80 | 0/0 | NC | 0/0 | missing<br>GT | match | missing<br>GT |
| 108971 | TruSeqV2    | 6:35358945 | intronic | C/C | 1.11E-15 | 0 | 0 | 45 | 99 | 0/0 | NC | 0/0 | missing<br>GT | match | missing<br>GT |
| 115239 | TruSeqV2    | 6:35358945 | intronic | C/C | 8.88E-16 | 0 | 0 | 45 | 99 | 0/0 | NC | 0/0 | missing<br>GT | match | missing<br>GT |
| 132306 | Agilent38MB | 6:35358945 | intronic | C/C | 4.44E-16 | 0 | 0 | 32 | 87 | 0/0 | NC | 0/0 | missing<br>GT | match | missing<br>GT |
| 163383 | TruSeqV2    | 6:35358945 | intronic | C/C | 6.66E-16 | 0 | 0 | 43 | 99 | 0/0 | NC | 0/0 | missing<br>GT | match | missing<br>GT |
| 198564 | Agilent38MB | 6:35358945 | intronic | C/C | 4.44E-16 | 0 | 0 | 43 | 99 | 0/0 | NC | 0/0 | missing<br>GT | match | missing<br>GT |
| 115239 | TruSeqV2    | 6:35359874 | intronic | G/G | 7.80E-08 | 0 | 0 | 22 | 60 | 0/0 | NC | 0/0 | missing<br>GT | match | missing<br>GT |
| 163383 | TruSeqV2    | 6:35359874 | intronic | G/G | 8.67E-13 | 0 | 0 | 32 | 75 | 0/0 | NC | 0/0 | missing<br>GT | match | missing<br>GT |
| 198564 | Agilent38MB | 6:35359874 | intronic | G/G | 5.98E-09 | 0 | 0 | 33 | 81 | 0/0 | NC | 0/0 | missing<br>GT | match | missing<br>GT |
| 108971 | TruSeqV2    | 6:35362525 | intronic | G/G | 2.44E-15 | 0 | 0 | 21 | 54 | 0/0 | NC | 0/0 | missing<br>GT | match | missing<br>GT |
| 115239 | TruSeqV2    | 6:35362525 | intronic | G/G | 1.55E-15 | 0 | 0 | 28 | 60 | 0/0 | NC | 0/0 | missing<br>GT | match | missing<br>GT |
| 132306 | Agilent38MB | 6:35362525 | intronic | G/G | 1.11E-14 | 0 | 0 | 16 | 39 | 0/0 | NC | 0/0 | missing<br>GT | match | missing<br>GT |
| 163383 | TruSeqV2    | 6:35362525 | intronic | G/G | 8.22E-15 | 0 | 0 | 14 | 30 | 0/0 | NC | 0/0 | missing<br>GT | match | missing<br>GT |
| 198564 | Agilent38MB | 6:35362525 | intronic | G/G | 1.27E-12 | 0 | 0 | 13 | 33 | 0/0 | NC | 0/0 | missing<br>GT | match | missing<br>GT |
| 108971 | TruSeqV2    | 6:35362848 | intronic | T/T | 4.44E-16 | 0 | 0 | 34 | 93 | 0/0 | NC | 0/0 | missing<br>GT | match | missing<br>GT |

|        |             |            |          |     |          |   |   |    |    |     |    |     |               |       |               |
|--------|-------------|------------|----------|-----|----------|---|---|----|----|-----|----|-----|---------------|-------|---------------|
| 115239 | TruSeqV2    | 6:35362848 | intronic | T/T | 4.44E-16 | 0 | 0 | 20 | 57 | 0/0 | NC | 0/0 | missing<br>GT | match | missing<br>GT |
| 132306 | Agilent38MB | 6:35362848 | intronic | T/T | 1.33E-15 | 0 | 0 | 26 | 75 | 0/0 | NC | 0/0 | missing<br>GT | match | missing<br>GT |
| 108971 | TruSeqV2    | 6:35363730 | intronic | G/G | 5.19E-11 | 0 | 0 | 36 | 96 | 0/0 | NC | 0/0 | missing<br>GT | match | missing<br>GT |
| 115239 | TruSeqV2    | 6:35363730 | intronic | G/G | 2.31E-09 | 0 | 0 | 34 | 81 | 0/0 | NC | 0/0 | missing<br>GT | match | missing<br>GT |
| 132306 | Agilent38MB | 6:35363730 | intronic | G/G | 2.35E-11 | 0 | 0 | 38 | 90 | 0/0 | NC | 0/0 | missing<br>GT | match | missing<br>GT |
| 163383 | TruSeqV2    | 6:35363730 | intronic | G/G | 6.20E-10 | 0 | 0 | 37 | 99 | 0/0 | NC | 0/0 | missing<br>GT | match | missing<br>GT |
| 108971 | TruSeqV2    | 6:35365346 | intronic | A/A | 4.44E-16 | 0 | 0 | 33 | 99 | 1/1 | NC | 1/1 | missing<br>GT | match | missing<br>GT |
| 115239 | TruSeqV2    | 6:35365346 | intronic | A/A | 6.66E-16 | 0 | 0 | 27 | 80 | 1/1 | NC | 1/1 | missing<br>GT | match | missing<br>GT |
| 132306 | Agilent38MB | 6:35365346 | intronic | A/A | 6.66E-16 | 0 | 0 | 23 | 69 | 1/1 | NC | 1/1 | missing<br>GT | match | missing<br>GT |
| 163383 | TruSeqV2    | 6:35365346 | intronic | A/A | 4.44E-16 | 0 | 0 | 24 | 72 | 1/1 | NC | 1/1 | missing<br>GT | match | missing<br>GT |
| 198564 | Agilent38MB | 6:35365346 | intronic | A/A | 4.44E-16 | 0 | 0 | 32 | 96 | 1/1 | NC | 1/1 | missing<br>GT | match | missing<br>GT |
| 108971 | TruSeqV2    | 6:35365457 | intronic | A/A | 1.55E-15 | 0 | 0 | 39 | 99 | 0/0 | NC | 0/0 | missing<br>GT | match | missing<br>GT |
| 115239 | TruSeqV2    | 6:35365457 | intronic | A/A | 2.00E-14 | 0 | 0 | 50 | 99 | 0/0 | NC | 0/0 | missing<br>GT | match | missing<br>GT |
| 132306 | Agilent38MB | 6:35365457 | intronic | A/A | 6.33E-14 | 0 | 0 | 33 | 87 | 0/0 | NC | 0/0 | missing<br>GT | match | missing<br>GT |
| 163383 | TruSeqV2    | 6:35365457 | intronic | A/A | 1.11E-15 | 0 | 0 | 43 | 99 | 0/0 | NC | 0/0 | missing<br>GT | match | missing<br>GT |
| 198564 | Agilent38MB | 6:35365457 | intronic | A/A | 1.33E-15 | 0 | 0 | 40 | 99 | 0/0 | NC | 0/0 | missing<br>GT | match | missing<br>GT |
| 108971 | TruSeqV2    | 6:35369491 | intronic | G/G | 1.55E-15 | 0 | 0 | 34 | 99 | 1/1 | NC | 1/1 | missing<br>GT | match | missing<br>GT |
| 115239 | TruSeqV2    | 6:35369491 | intronic | G/G | 2.35E-14 | 0 | 0 | 38 | 99 | 1/1 | NC | 1/1 | missing<br>GT | match | missing<br>GT |
| 132306 | Agilent38MB | 6:35369491 | intronic | G/G | 1.11E-15 | 0 | 0 | 43 | 99 | 1/1 | NC | 1/1 | missing<br>GT | match | missing<br>GT |

|        |             |            |          |     |          |   |   |    |    |     |    |     |               |       |               |
|--------|-------------|------------|----------|-----|----------|---|---|----|----|-----|----|-----|---------------|-------|---------------|
| 163383 | TruSeqV2    | 6:35369491 | intronic | G/G | 1.24E-14 | 0 | 0 | 41 | 99 | 1/1 | NC | 1/1 | missing<br>GT | match | missing<br>GT |
| 198564 | Agilent38MB | 6:35369491 | intronic | G/G | 8.17E-13 | 0 | 0 | 28 | 83 | 1/1 | NC | 1/1 | missing<br>GT | match | missing<br>GT |
| 108971 | TruSeqV2    | 6:35369806 | intronic | T/T | 1.51E-14 | 0 | 0 | 29 | 87 | 1/1 | NC | 1/1 | missing<br>GT | match | missing<br>GT |
| 115239 | TruSeqV2    | 6:35369806 | intronic | T/T | 9.46E-14 | 0 | 0 | 26 | 78 | 1/1 | NC | 1/1 | missing<br>GT | match | missing<br>GT |
| 132306 | Agilent38MB | 6:35369806 | intronic | T/T | 6.88E-15 | 0 | 0 | 26 | 78 | 1/1 | NC | 1/1 | missing<br>GT | match | missing<br>GT |
| 163383 | TruSeqV2    | 6:35369806 | intronic | T/T | 2.46E-14 | 0 | 0 | 21 | 63 | 1/1 | NC | 1/1 | missing<br>GT | match | missing<br>GT |
| 198564 | Agilent38MB | 6:35369806 | intronic | T/T | 2.15E-13 | 0 | 0 | 20 | 59 | 1/1 | NC | 1/1 | missing<br>GT | match | missing<br>GT |
| 108971 | TruSeqV2    | 6:35369834 | intronic | C/C | 4.44E-16 | 0 | 0 | 33 | 81 | 0/0 | NC | 0/0 | missing<br>GT | match | missing<br>GT |
| 115239 | TruSeqV2    | 6:35369834 | intronic | C/C | 6.66E-16 | 0 | 0 | 25 | 66 | 0/0 | NC | 0/0 | missing<br>GT | match | missing<br>GT |
| 132306 | Agilent38MB | 6:35369834 | intronic | C/C | 2.22E-16 | 0 | 0 | 30 | 69 | 0/0 | NC | 0/0 | missing<br>GT | match | missing<br>GT |
| 163383 | TruSeqV2    | 6:35369834 | intronic | C/C | 2.22E-16 | 0 | 0 | 24 | 66 | 0/0 | NC | 0/0 | missing<br>GT | match | missing<br>GT |
| 198564 | Agilent38MB | 6:35369834 | intronic | C/C | 2.89E-15 | 0 | 0 | 24 | 69 | 0/0 | NC | 0/0 | missing<br>GT | match | missing<br>GT |
| 108971 | TruSeqV2    | 6:35371753 | intronic | G/G | 6.66E-16 | 0 | 0 | 34 | 99 | 1/1 | NC | 1/1 | missing<br>GT | match | missing<br>GT |
| 115239 | TruSeqV2    | 6:35371753 | intronic | G/G | 6.66E-16 | 0 | 0 | 24 | 71 | 1/1 | NC | 1/1 | missing<br>GT | match | missing<br>GT |
| 163383 | TruSeqV2    | 6:35371753 | intronic | G/G | 1.11E-15 | 0 | 0 | 43 | 99 | 1/1 | NC | 1/1 | missing<br>GT | match | missing<br>GT |
| 108971 | TruSeqV2    | 6:35372524 | intronic | C/C | 2.66E-15 | 0 | 0 | 25 | 73 | 1/1 | NC | 1/1 | missing<br>GT | match | missing<br>GT |
| 115239 | TruSeqV2    | 6:35372524 | intronic | C/C | 1.55E-15 | 0 | 0 | 30 | 52 | 1/1 | NC | 1/1 | missing<br>GT | match | missing<br>GT |
| 132306 | Agilent38MB | 6:35372524 | intronic | C/C | 1.33E-15 | 0 | 0 | 27 | 81 | 1/1 | NC | 1/1 | missing<br>GT | match | missing<br>GT |
| 163383 | TruSeqV2    | 6:35372524 | intronic | C/C | 2.00E-15 | 0 | 0 | 28 | 84 | 1/1 | NC | 1/1 | missing<br>GT | match | missing<br>GT |

|        |             |            |          |     |          |   |   |    |    |     |    |     |               |       |               |
|--------|-------------|------------|----------|-----|----------|---|---|----|----|-----|----|-----|---------------|-------|---------------|
| 198564 | Agilent38MB | 6:35372524 | intronic | C/C | 4.22E-15 | 0 | 0 | 33 | 97 | 1/1 | NC | 1/1 | missing<br>GT | match | missing<br>GT |
| 108971 | TruSeqV2    | 6:35374466 | intronic | A/A | 4.44E-16 | 0 | 0 | 33 | 99 | 1/1 | NC | 1/1 | missing<br>GT | match | missing<br>GT |
| 115239 | TruSeqV2    | 6:35374466 | intronic | A/A | 6.66E-16 | 0 | 0 | 25 | 75 | 1/1 | NC | 1/1 | missing<br>GT | match | missing<br>GT |
| 163383 | TruSeqV2    | 6:35374466 | intronic | A/A | 4.44E-16 | 0 | 0 | 32 | 96 | 1/1 | NC | 1/1 | missing<br>GT | match | missing<br>GT |
| 115239 | TruSeqV2    | 6:35375526 | intronic | C/C | 6.66E-16 | 0 | 0 | 30 | 72 | 0/0 | NC | 0/0 | missing<br>GT | match | missing<br>GT |
| 132306 | Agilent38MB | 6:35375526 | intronic | C/C | 6.66E-16 | 0 | 0 | 10 | 2  | 0/0 | NC | 0/0 | missing<br>GT | match | missing<br>GT |
| 163383 | TruSeqV2    | 6:35375526 | intronic | C/C | 8.88E-16 | 0 | 0 | 22 | 66 | 0/0 | NC | 0/0 | missing<br>GT | match | missing<br>GT |
| 198564 | Agilent38MB | 6:35375526 | intronic | C/C | 6.66E-16 | 0 | 0 | 35 | 96 | 0/0 | NC | 0/0 | missing<br>GT | match | missing<br>GT |
| 108971 | TruSeqV2    | 6:35376287 | intronic | C/C | 1.33E-15 | 0 | 0 | 38 | 99 | 0/0 | NC | 0/0 | missing<br>GT | match | missing<br>GT |
| 115239 | TruSeqV2    | 6:35376287 | intronic | C/C | 8.88E-16 | 0 | 0 | 41 | 99 | 0/0 | NC | 0/0 | missing<br>GT | match | missing<br>GT |
| 132306 | Agilent38MB | 6:35376287 | intronic | C/C | 4.44E-16 | 0 | 0 | 24 | 69 | 0/0 | NC | 0/0 | missing<br>GT | match | missing<br>GT |
| 163383 | TruSeqV2    | 6:35376287 | intronic | C/C | 8.88E-16 | 0 | 0 | 39 | 99 | 0/0 | NC | 0/0 | missing<br>GT | match | missing<br>GT |
| 198564 | Agilent38MB | 6:35376287 | intronic | C/C | 4.88E-15 | 0 | 0 | 44 | 96 | 0/0 | NC | 0/0 | missing<br>GT | match | missing<br>GT |
| 108971 | TruSeqV2    | 6:35376350 | intronic | A/A | 8.88E-16 | 0 | 0 | 35 | 96 | 0/0 | NC | 0/0 | missing<br>GT | match | missing<br>GT |
| 115239 | TruSeqV2    | 6:35376350 | intronic | A/A | 2.44E-15 | 0 | 0 | 31 | 75 | 0/0 | NC | 0/0 | missing<br>GT | match | missing<br>GT |
| 163383 | TruSeqV2    | 6:35376350 | intronic | A/A | 1.78E-15 | 0 | 0 | 47 | 99 | 0/0 | NC | 0/0 | missing<br>GT | match | missing<br>GT |
| 198564 | Agilent38MB | 6:35376350 | intronic | A/A | 4.44E-16 | 0 | 0 | 37 | 90 | 0/0 | NC | 0/0 | missing<br>GT | match | missing<br>GT |
| 108971 | TruSeqV2    | 6:35376403 | intronic | C/C | 4.44E-16 | 0 | 0 | 25 | 66 | 0/0 | NC | 0/0 | missing<br>GT | match | missing<br>GT |
| 115239 | TruSeqV2    | 6:35376403 | intronic | C/C | 2.22E-16 | 0 | 0 | 27 | 60 | 0/0 | NC | 0/0 | missing<br>GT | match | missing<br>GT |

|        |             |            |          |     |          |   |   |    |    |     |    |     |               |       |               |
|--------|-------------|------------|----------|-----|----------|---|---|----|----|-----|----|-----|---------------|-------|---------------|
| 132306 | Agilent38MB | 6:35376403 | intronic | C/C | 2.22E-16 | 0 | 0 | 39 | 99 | 0/0 | NC | 0/0 | missing<br>GT | match | missing<br>GT |
| 163383 | TruSeqV2    | 6:35376403 | intronic | C/C | 2.22E-16 | 0 | 0 | 37 | 99 | 0/0 | NC | 0/0 | missing<br>GT | match | missing<br>GT |
| 198564 | Agilent38MB | 6:35376403 | intronic | C/C | 2.89E-15 | 0 | 0 | 36 | 90 | 0/0 | NC | 0/0 | missing<br>GT | match | missing<br>GT |
| 108971 | TruSeqV2    | 6:35376414 | intronic | A/A | 2.22E-16 | 0 | 0 | 27 | 69 | 0/0 | NC | 0/0 | missing<br>GT | match | missing<br>GT |
| 115239 | TruSeqV2    | 6:35376414 | intronic | A/A | 2.22E-16 | 0 | 0 | 21 | 45 | 0/0 | NC | 0/0 | missing<br>GT | match | missing<br>GT |
| 132306 | Agilent38MB | 6:35376414 | intronic | A/A | 2.22E-16 | 0 | 0 | 37 | 93 | 0/0 | NC | 0/0 | missing<br>GT | match | missing<br>GT |
| 163383 | TruSeqV2    | 6:35376414 | intronic | A/A | 2.22E-16 | 0 | 0 | 37 | 99 | 0/0 | NC | 0/0 | missing<br>GT | match | missing<br>GT |
| 198564 | Agilent38MB | 6:35376414 | intronic | A/A | 4.44E-16 | 0 | 0 | 34 | 80 | 0/0 | NC | 0/0 | missing<br>GT | match | missing<br>GT |
| 108971 | TruSeqV2    | 6:35376422 | intronic | A/A | 6.66E-16 | 0 | 0 | 30 | 75 | 0/0 | NC | 0/0 | missing<br>GT | match | missing<br>GT |
| 115239 | TruSeqV2    | 6:35376422 | intronic | A/A | 2.22E-16 | 0 | 0 | 16 | 42 | 0/0 | NC | 0/0 | missing<br>GT | match | missing<br>GT |
| 132306 | Agilent38MB | 6:35376422 | intronic | A/A | 4.44E-16 | 0 | 0 | 35 | 99 | 0/0 | NC | 0/0 | missing<br>GT | match | missing<br>GT |
| 163383 | TruSeqV2    | 6:35376422 | intronic | A/A | 2.22E-16 | 0 | 0 | 37 | 77 | 0/0 | NC | 0/0 | missing<br>GT | match | missing<br>GT |
| 198564 | Agilent38MB | 6:35376422 | intronic | A/A | 8.88E-16 | 0 | 0 | 35 | 99 | 0/0 | NC | 0/0 | missing<br>GT | match | missing<br>GT |
| 108971 | TruSeqV2    | 6:35376679 | intronic | A/A | 2.22E-16 | 0 | 0 | 31 | 84 | 0/0 | NC | 0/0 | missing<br>GT | match | missing<br>GT |
| 115239 | TruSeqV2    | 6:35376679 | intronic | A/A | 1.11E-15 | 0 | 0 | 38 | 99 | 0/0 | NC | 0/0 | missing<br>GT | match | missing<br>GT |
| 132306 | Agilent38MB | 6:35376679 | intronic | A/A | 4.44E-16 | 0 | 0 | 33 | 93 | 0/0 | NC | 0/0 | missing<br>GT | match | missing<br>GT |
| 163383 | TruSeqV2    | 6:35376679 | intronic | A/A | 2.22E-16 | 0 | 0 | 48 | 99 | 0/0 | NC | 0/0 | missing<br>GT | match | missing<br>GT |
| 108971 | TruSeqV2    | 6:35376713 | intronic | A/A | 8.88E-16 | 0 | 0 | 33 | 99 | 0/0 | NC | 0/0 | missing<br>GT | match | missing<br>GT |
| 115239 | TruSeqV2    | 6:35376713 | intronic | A/A | 5.55E-15 | 0 | 0 | 29 | 75 | 0/0 | NC | 0/0 | missing<br>GT | match | missing<br>GT |



|        |             |            |          |     |          |   |   |    |    |     |    |     |               |       |               |
|--------|-------------|------------|----------|-----|----------|---|---|----|----|-----|----|-----|---------------|-------|---------------|
| 132306 | Agilent38MB | 6:35376713 | intronic | A/A | 4.88E-15 | 0 | 0 | 37 | 99 | 0/0 | NC | 0/0 | missing<br>GT | match | missing<br>GT |
| 163383 | TruSeqV2    | 6:35376713 | intronic | A/A | 4.00E-15 | 0 | 0 | 36 | 94 | 0/0 | NC | 0/0 | missing<br>GT | match | missing<br>GT |
| 108971 | TruSeqV2    | 6:35377301 | intronic | A/A | 4.20E-13 | 0 | 0 | 38 | 99 | 1/1 | NC | 1/1 | missing<br>GT | match | missing<br>GT |
| 115239 | TruSeqV2    | 6:35377301 | intronic | A/A | 1.67E-14 | 0 | 0 | 40 | 99 | 1/1 | NC | 1/1 | missing<br>GT | match | missing<br>GT |
| 132306 | Agilent38MB | 6:35377301 | intronic | A/A | 2.15E-11 | 0 | 0 | 27 | 81 | 1/1 | NC | 1/1 | missing<br>GT | match | missing<br>GT |
| 163383 | TruSeqV2    | 6:35377301 | intronic | A/A | 1.27E-08 | 0 | 0 | 32 | 96 | 1/1 | NC | 1/1 | missing<br>GT | match | missing<br>GT |
| 108971 | TruSeqV2    | 6:35377922 | intronic | A/A | 4.44E-16 | 0 | 0 | 44 | 99 | 1/1 | NC | 1/1 | missing<br>GT | match | missing<br>GT |
| 115239 | TruSeqV2    | 6:35377922 | intronic | A/A | 4.44E-16 | 0 | 0 | 30 | 90 | 1/1 | NC | 1/1 | missing<br>GT | match | missing<br>GT |
| 132306 | Agilent38MB | 6:35377922 | intronic | A/A | 4.44E-16 | 0 | 0 | 47 | 99 | 1/1 | NC | 1/1 | missing<br>GT | match | missing<br>GT |
| 163383 | TruSeqV2    | 6:35377922 | intronic | A/A | 4.44E-16 | 0 | 0 | 43 | 99 | 1/1 | NC | 1/1 | missing<br>GT | match | missing<br>GT |
| 198564 | Agilent38MB | 6:35377922 | intronic | A/A | 2.22E-15 | 0 | 0 | 37 | 99 | 1/1 | NC | 1/1 | missing<br>GT | match | missing<br>GT |
| 108971 | TruSeqV2    | 6:35378124 | intronic | A/A | 4.44E-16 | 0 | 0 | 32 | 96 | 1/1 | NC | 1/1 | missing<br>GT | match | missing<br>GT |
| 115239 | TruSeqV2    | 6:35378124 | intronic | A/A | 6.66E-16 | 0 | 0 | 27 | 81 | 1/1 | NC | 1/1 | missing<br>GT | match | missing<br>GT |
| 132306 | Agilent38MB | 6:35378124 | intronic | A/A | 4.44E-16 | 0 | 0 | 31 | 93 | 1/1 | NC | 1/1 | missing<br>GT | match | missing<br>GT |
| 163383 | TruSeqV2    | 6:35378124 | intronic | A/A | 4.44E-16 | 0 | 0 | 22 | 66 | 1/1 | NC | 1/1 | missing<br>GT | match | missing<br>GT |
| 198564 | Agilent38MB | 6:35378124 | intronic | A/A | 6.66E-16 | 0 | 0 | 39 | 99 | 1/1 | NC | 1/1 | missing<br>GT | match | missing<br>GT |
| 108971 | TruSeqV2    | 6:43264787 | promoter | T/T | 6.66E-16 | 0 | 0 | 41 | 99 | 1/1 | NC | 1/1 | missing<br>GT | match | missing<br>GT |
| 115239 | TruSeqV2    | 6:43264787 | promoter | T/T | 4.44E-16 | 0 | 0 | 28 | 84 | 1/1 | NC | 1/1 | missing<br>GT | match | missing<br>GT |
| 163383 | TruSeqV2    | 6:43264787 | promoter | T/T | 4.44E-16 | 0 | 0 | 30 | 89 | 1/1 | NC | 1/1 | missing<br>GT | match | missing<br>GT |

|        |             |            |          |     |          |   |   |    |    |     |    |     |               |       |               |
|--------|-------------|------------|----------|-----|----------|---|---|----|----|-----|----|-----|---------------|-------|---------------|
| 198564 | Agilent38MB | 6:43264787 | promoter | T/T | 5.77E-15 | 0 | 0 | 35 | 99 | 1/1 | NC | 1/1 | missing<br>GT | match | missing<br>GT |
| 108971 | TruSeqV2    | 6:46624537 | intronic | G/G | 1.89E-12 | 0 | 0 | 56 | 99 | 0/0 | NC | 0/0 | missing<br>GT | match | missing<br>GT |
| 115239 | TruSeqV2    | 6:46624537 | intronic | G/G | 4.44E-16 | 0 | 0 | 34 | 96 | 0/0 | NC | 0/0 | missing<br>GT | match | missing<br>GT |
| 132306 | Agilent38MB | 6:46624537 | intronic | G/G | 2.22E-16 | 0 | 0 | 40 | 99 | 0/0 | NC | 0/0 | missing<br>GT | match | missing<br>GT |
| 163383 | TruSeqV2    | 6:46624537 | intronic | G/G | 4.44E-16 | 0 | 0 | 46 | 99 | 0/0 | NC | 0/0 | missing<br>GT | match | missing<br>GT |
| 198564 | Agilent38MB | 6:46624537 | intronic | G/G | 3.55E-15 | 0 | 0 | 56 | 99 | 0/0 | NC | 0/0 | missing<br>GT | match | missing<br>GT |
| 108971 | TruSeqV2    | 6:46625274 | intronic | G/A | 2.69E-14 | 0 | 0 | 42 | 99 | 0/1 | NC | 0/1 | missing<br>GT | match | missing<br>GT |
| 115239 | TruSeqV2    | 6:46625274 | intronic | G/G | 2.22E-15 | 0 | 0 | 45 | 92 | 1/1 | NC | 1/1 | missing<br>GT | match | missing<br>GT |
| 132306 | Agilent38MB | 6:46625274 | intronic | G/G | 1.78E-15 | 0 | 0 | 40 | 99 | 1/1 | NC | 1/1 | missing<br>GT | match | missing<br>GT |
| 163383 | TruSeqV2    | 6:46625274 | intronic | G/A | 8.88E-16 | 0 | 0 | 32 | 99 | 0/1 | NC | 0/1 | missing<br>GT | match | missing<br>GT |
| 198564 | Agilent38MB | 6:46625274 | intronic | G/A | 8.22E-15 | 0 | 0 | 43 | 99 | 0/1 | NC | 0/1 | missing<br>GT | match | missing<br>GT |
| 108971 | TruSeqV2    | 6:46626353 | intronic | A/A | 1.08E-07 | 0 | 0 | 44 | 99 | 0/0 | NC | 0/0 | missing<br>GT | match | missing<br>GT |
| 115239 | TruSeqV2    | 6:46626353 | intronic | A/A | 5.33E-15 | 0 | 0 | 39 | 0  | 0/0 | NC | 0/0 | missing<br>GT | match | missing<br>GT |
| 163383 | TruSeqV2    | 6:46626353 | intronic | A/A | 9.55E-15 | 0 | 0 | 38 | 99 | 0/0 | NC | 0/0 | missing<br>GT | match | missing<br>GT |
| 198564 | Agilent38MB | 6:46626353 | intronic | G/A | 3.18E-14 | 0 | 0 | 44 | 99 | 0/1 | NC | 0/1 | missing<br>GT | match | missing<br>GT |
| 108971 | TruSeqV2    | 6:52669185 | promoter | C/A | 1.11E-15 | 0 | 0 | 46 | 99 | 0/1 | NC | 0/1 | missing<br>GT | match | missing<br>GT |
| 115239 | TruSeqV2    | 6:52669185 | promoter | C/C | 1.82E-14 | 0 | 0 | 48 | 99 | 0/0 | NC | 0/0 | missing<br>GT | match | missing<br>GT |
| 132306 | Agilent38MB | 6:52669185 | promoter | A/A | 8.88E-16 | 0 | 0 | 45 | 99 | 1/1 | NC | 1/1 | missing<br>GT | match | missing<br>GT |
| 163383 | TruSeqV2    | 6:52669185 | promoter | A/A | 8.88E-16 | 0 | 0 | 43 | 99 | 1/1 | NC | 1/1 | missing<br>GT | match | missing<br>GT |

|        |             |            |          |     |            |   |   |    |    |     |    |     |               |       |               |
|--------|-------------|------------|----------|-----|------------|---|---|----|----|-----|----|-----|---------------|-------|---------------|
| 108971 | TruSeqV2    | 6:52669249 | promoter | C/C | 8.61E-10   | 0 | 0 | 36 | 93 | 0/0 | NC | 0/0 | missing<br>GT | match | missing<br>GT |
| 115239 | TruSeqV2    | 6:52669249 | promoter | C/C | 3.67E-10   | 0 | 0 | 40 | 99 | 0/0 | NC | 0/0 | missing<br>GT | match | missing<br>GT |
| 132306 | Agilent38MB | 6:52669249 | promoter | C/C | 5.10E-09   | 0 | 0 | 33 | 73 | 0/0 | NC | 0/0 | missing<br>GT | match | missing<br>GT |
| 163383 | TruSeqV2    | 6:52669249 | promoter | C/A | 0.00039947 | 0 | 0 | 43 | 99 | 0/1 | NC | 0/1 | missing<br>GT | match | missing<br>GT |
| 198564 | Agilent38MB | 6:52669249 | promoter | C/A | 1.96E-05   | 0 | 0 | 51 | 99 | 0/1 | NC | 0/1 | missing<br>GT | match | missing<br>GT |
| 108971 | TruSeqV2    | 6:52708797 | intronic | G/G | 1.35E-14   | 0 | 0 | 31 | 45 | 0/0 | NC | 0/0 | missing<br>GT | match | missing<br>GT |
| 115239 | TruSeqV2    | 6:52708797 | intronic | G/G | 4.88E-15   | 0 | 0 | 34 | 54 | 0/0 | NC | 0/0 | missing<br>GT | match | missing<br>GT |
| 132306 | Agilent38MB | 6:52708797 | intronic | G/A | 3.26E-14   | 0 | 0 | 38 | 99 | 0/1 | NC | 0/1 | missing<br>GT | match | missing<br>GT |
| 163383 | TruSeqV2    | 6:52708797 | intronic | G/A | 8.30E-14   | 0 | 0 | 36 | 99 | 0/1 | NC | 0/1 | missing<br>GT | match | missing<br>GT |
| 198564 | Agilent38MB | 6:52708797 | intronic | G/A | 4.66E-15   | 0 | 0 | 55 | 99 | 0/1 | NC | 0/1 | missing<br>GT | match | missing<br>GT |
| 108971 | TruSeqV2    | 6:52709117 | intronic | G/G | 6.66E-16   | 0 | 0 | 48 | 99 | 0/0 | NC | 0/0 | missing<br>GT | match | missing<br>GT |
| 115239 | TruSeqV2    | 6:52709117 | intronic | G/G | 6.66E-16   | 0 | 0 | 40 | 99 | 0/0 | NC | 0/0 | missing<br>GT | match | missing<br>GT |
| 132306 | Agilent38MB | 6:52709117 | intronic | G/G | 1.33E-15   | 0 | 0 | 38 | 99 | 0/0 | NC | 0/0 | missing<br>GT | match | missing<br>GT |
| 163383 | TruSeqV2    | 6:52709117 | intronic | G/G | 1.78E-15   | 0 | 0 | 35 | 87 | 0/0 | NC | 0/0 | missing<br>GT | match | missing<br>GT |
| 108971 | TruSeqV2    | 6:52714573 | promoter | G/G | 2.22E-16   | 0 | 0 | 39 | 99 | 1/1 | NC | 1/1 | missing<br>GT | match | missing<br>GT |
| 115239 | TruSeqV2    | 6:52714573 | promoter | G/G | 3.06E-14   | 0 | 0 | 39 | 99 | 1/1 | NC | 1/1 | missing<br>GT | match | missing<br>GT |
| 132306 | Agilent38MB | 6:52714573 | promoter | G/G | 4.44E-16   | 0 | 0 | 25 | 75 | 1/1 | NC | 1/1 | missing<br>GT | match | missing<br>GT |
| 163383 | TruSeqV2    | 6:52714573 | promoter | G/G | 1.78E-15   | 0 | 0 | 31 | 93 | 1/1 | NC | 1/1 | missing<br>GT | match | missing<br>GT |
| 198564 | Agilent38MB | 6:52714573 | promoter | G/G | 1.31E-14   | 0 | 0 | 36 | 99 | 1/1 | NC | 1/1 | missing<br>GT | match | missing<br>GT |

|        |             |             |          |     |          |   |   |    |    |     |    |     |               |       |               |
|--------|-------------|-------------|----------|-----|----------|---|---|----|----|-----|----|-----|---------------|-------|---------------|
| 132306 | Agilent38MB | 6:52842781  | 3'UTR    | T/C | 3.33E-15 | 0 | 0 | 35 | 99 | 0/1 | NC | 0/1 | missing<br>GT | match | missing<br>GT |
| 198564 | Agilent38MB | 6:52842781  | 3'UTR    | T/C | 2.00E-15 | 0 | 0 | 48 | 99 | 0/1 | NC | 0/1 | missing<br>GT | match | missing<br>GT |
| 132306 | Agilent38MB | 6:52842839  | 3'UTR    | C/C | 4.95E-14 | 0 | 0 | 30 | 81 | 0/0 | NC | 0/0 | missing<br>GT | match | missing<br>GT |
| 198564 | Agilent38MB | 6:52842839  | 3'UTR    | C/C | 2.22E-15 | 0 | 0 | 50 | 99 | 0/0 | NC | 0/0 | missing<br>GT | match | missing<br>GT |
| 108971 | TruSeqV2    | 6:52860407  | promoter | T/C | 4.66E-15 | 0 | 0 | 45 | 99 | 0/1 | NC | 0/1 | missing<br>GT | match | missing<br>GT |
| 115239 | TruSeqV2    | 6:52860407  | promoter | T/T | 1.33E-15 | 0 | 0 | 29 | 81 | 0/0 | NC | 0/0 | missing<br>GT | match | missing<br>GT |
| 132306 | Agilent38MB | 6:52860407  | promoter | T/C | 2.00E-15 | 0 | 0 | 33 | 99 | 0/1 | NC | 0/1 | missing<br>GT | match | missing<br>GT |
| 163383 | TruSeqV2    | 6:52860407  | promoter | T/C | 1.33E-15 | 0 | 0 | 37 | 99 | 0/1 | NC | 0/1 | missing<br>GT | match | missing<br>GT |
| 198564 | Agilent38MB | 6:52860407  | promoter | T/T | 9.84E-14 | 0 | 0 | 44 | 99 | 0/0 | NC | 0/0 | missing<br>GT | match | missing<br>GT |
| 108971 | TruSeqV2    | 6:52860408  | promoter | T/T | 2.89E-15 | 0 | 0 | 44 | 99 | 0/0 | NC | 0/0 | missing<br>GT | match | missing<br>GT |
| 115239 | TruSeqV2    | 6:52860408  | promoter | T/T | 7.24E-14 | 0 | 0 | 30 | 84 | 0/0 | NC | 0/0 | missing<br>GT | match | missing<br>GT |
| 132306 | Agilent38MB | 6:52860408  | promoter | T/T | 5.11E-14 | 0 | 0 | 34 | 81 | 0/0 | NC | 0/0 | missing<br>GT | match | missing<br>GT |
| 198564 | Agilent38MB | 6:52860408  | promoter | T/T | 5.05E-10 | 0 | 0 | 45 | 99 | 0/0 | NC | 0/0 | missing<br>GT | match | missing<br>GT |
| 132306 | Agilent38MB | 7:122754358 | 3'UTR    | G/G | 3.55E-15 | 0 | 0 | 34 | 90 | 0/0 | NC | 0/0 | missing<br>GT | match | missing<br>GT |
| 198564 | Agilent38MB | 7:122754358 | 3'UTR    | G/A | 6.22E-15 | 0 | 0 | 39 | 99 | 0/1 | NC | 0/1 | missing<br>GT | match | missing<br>GT |
| 108971 | TruSeqV2    | 7:122837541 | intronic | C/C | 1.11E-15 | 0 | 0 | 39 | 99 | 0/0 | NC | 0/0 | missing<br>GT | match | missing<br>GT |
| 115239 | TruSeqV2    | 7:122837541 | intronic | C/C | 8.88E-16 | 0 | 0 | 47 | 99 | 0/0 | NC | 0/0 | missing<br>GT | match | missing<br>GT |
| 132306 | Agilent38MB | 7:122837541 | intronic | C/C | 3.58E-13 | 0 | 0 | 52 | 99 | 0/0 | NC | 0/0 | missing<br>GT | match | missing<br>GT |
| 163383 | TruSeqV2    | 7:122837541 | intronic | C/C | 1.87E-13 | 0 | 0 | 51 | 99 | 0/0 | NC | 0/0 | missing<br>GT | match | missing<br>GT |

|        |             |             |          |     |          |   |   |    |    |     |    |     |               |       |               |
|--------|-------------|-------------|----------|-----|----------|---|---|----|----|-----|----|-----|---------------|-------|---------------|
| 198564 | Agilent38MB | 7:122837541 | intronic | C/C | 1.55E-15 | 0 | 0 | 51 | 99 | 0/0 | NC | 0/0 | missing<br>GT | match | missing<br>GT |
| 108971 | TruSeqV2    | 7:122838090 | intronic | G/C | 1.78E-15 | 0 | 0 | 43 | 99 | 0/1 | NC | 0/1 | missing<br>GT | match | missing<br>GT |
| 115239 | TruSeqV2    | 7:122838090 | intronic | G/G | 1.33E-15 | 0 | 0 | 53 | 28 | 0/0 | NC | 0/0 | missing<br>GT | match | missing<br>GT |
| 132306 | Agilent38MB | 7:122838090 | intronic | G/C | 6.66E-16 | 0 | 0 | 52 | 99 | 0/1 | NC | 0/1 | missing<br>GT | match | missing<br>GT |
| 163383 | TruSeqV2    | 7:122838090 | intronic | G/C | 6.66E-16 | 0 | 0 | 37 | 99 | 0/1 | NC | 0/1 | missing<br>GT | match | missing<br>GT |
| 198564 | Agilent38MB | 7:122838090 | intronic | G/C | 6.66E-16 | 0 | 0 | 39 | 99 | 0/1 | NC | 0/1 | missing<br>GT | match | missing<br>GT |
| 108971 | TruSeqV2    | 7:122838633 | intronic | T/G | 8.88E-16 | 0 | 0 | 34 | 99 | 0/1 | NC | 0/1 | missing<br>GT | match | missing<br>GT |
| 115239 | TruSeqV2    | 7:122838633 | intronic | G/G | 2.22E-15 | 0 | 0 | 31 | 66 | 0/0 | NC | 0/0 | missing<br>GT | match | missing<br>GT |
| 132306 | Agilent38MB | 7:122838633 | intronic | T/G | 6.66E-16 | 0 | 0 | 40 | 99 | 0/1 | NC | 0/1 | missing<br>GT | match | missing<br>GT |
| 163383 | TruSeqV2    | 7:122838633 | intronic | T/G | 6.66E-16 | 0 | 0 | 32 | 99 | 0/1 | NC | 0/1 | missing<br>GT | match | missing<br>GT |
| 198564 | Agilent38MB | 7:150549427 | promoter | C/C | 3.11E-15 | 0 | 0 | 31 | 72 | 0/0 | NC | 0/0 | missing<br>GT | match | missing<br>GT |
| 108971 | TruSeqV2    | 7:17338147  | promoter | C/C | 9.55E-15 | 0 | 0 | 9  | 27 | 0/0 | NC | 0/0 | missing<br>GT | match | missing<br>GT |
| 115239 | TruSeqV2    | 7:17338147  | promoter | C/C | 1.33E-15 | 0 | 0 | 9  | 18 | 0/0 | NC | 0/0 | missing<br>GT | match | missing<br>GT |
| 132306 | Agilent38MB | 7:17338147  | promoter | C/T | 8.66E-15 | 0 | 0 | 11 | 99 | 0/1 | NC | 0/1 | missing<br>GT | match | missing<br>GT |
| 163383 | TruSeqV2    | 7:17338147  | promoter | C/T | 3.55E-15 | 0 | 0 | 7  | 9  | 0/1 | NC | 0/1 | missing<br>GT | match | missing<br>GT |
| 198564 | Agilent38MB | 7:17338425  | 5'UTR    | G/G | 2.33E-14 | 0 | 0 | 1  | 3  | 0/0 | NC | 0/0 | missing<br>GT | match | missing<br>GT |
| 163383 | TruSeqV2    | 7:17339078  | intronic | C/C | 4.88E-15 | 0 | 0 | 19 | 48 | 0/0 | NC | 0/0 | missing<br>GT | match | missing<br>GT |
| 132306 | Agilent38MB | 7:17385198  | 3'UTR    | C/C | 1.53E-14 | 0 | 0 | 27 | 72 | 0/0 | NC | 0/0 | missing<br>GT | match | missing<br>GT |
| 198564 | Agilent38MB | 7:17385198  | 3'UTR    | C/C | 1.55E-15 | 0 | 0 | 34 | 90 | 0/0 | NC | 0/0 | missing<br>GT | match | missing<br>GT |

|        |             |            |          |     |          |   |   |    |    |     |    |     |               |       |               |
|--------|-------------|------------|----------|-----|----------|---|---|----|----|-----|----|-----|---------------|-------|---------------|
| 132306 | Agilent38MB | 7:17385270 | 3'UTR    | C/C | 2.22E-15 | 0 | 0 | 38 | 99 | 0/0 | NC | 0/0 | missing<br>GT | match | missing<br>GT |
| 198564 | Agilent38MB | 7:17385270 | 3'UTR    | C/C | 1.33E-15 | 0 | 0 | 45 | 99 | 0/0 | NC | 0/0 | missing<br>GT | match | missing<br>GT |
| 108971 | TruSeqV2    | 7:75592925 | intronic | C/T | 8.88E-16 | 0 | 0 | 44 | 99 | 0/1 | NC | 0/1 | missing<br>GT | match | missing<br>GT |
| 115239 | TruSeqV2    | 7:75592925 | intronic | C/T | 1.11E-15 | 0 | 0 | 20 | 99 | 0/1 | NC | 0/1 | missing<br>GT | match | missing<br>GT |
| 132306 | Agilent38MB | 7:75592925 | intronic | C/T | 3.20E-14 | 0 | 0 | 44 | 99 | 0/1 | NC | 0/1 | missing<br>GT | match | missing<br>GT |
| 163383 | TruSeqV2    | 7:75592925 | intronic | C/T | 4.44E-16 | 0 | 0 | 41 | 99 | 0/1 | NC | 0/1 | missing<br>GT | match | missing<br>GT |
| 198564 | Agilent38MB | 7:75616105 | 3'UTR    | A/G | 2.13E-14 | 0 | 0 | 57 | 99 | 0/1 | NC | 0/1 | missing<br>GT | match | missing<br>GT |
| 132306 | Agilent38MB | 7:75616171 | 3'UTR    | G/G | 1.32E-09 | 0 | 0 | 49 | 99 | 0/0 | NC | 0/0 | missing<br>GT | match | missing<br>GT |
| 115239 | TruSeqV2    | 7:87029287 | 3'UTR    | G/G | 3.18E-14 | 0 | 0 | 45 | 99 | 1/1 | NC | 1/1 | missing<br>GT | match | missing<br>GT |
| 132306 | Agilent38MB | 7:87029287 | 3'UTR    | G/G | 2.49E-14 | 0 | 0 | 32 | 96 | 1/1 | NC | 1/1 | missing<br>GT | match | missing<br>GT |
| 163383 | TruSeqV2    | 7:87029287 | 3'UTR    | G/G | 4.15E-14 | 0 | 0 | 34 | 99 | 1/1 | NC | 1/1 | missing<br>GT | match | missing<br>GT |
| 198564 | Agilent38MB | 7:87029287 | 3'UTR    | G/G | 1.17E-12 | 0 | 0 | 39 | 99 | 1/1 | NC | 1/1 | missing<br>GT | match | missing<br>GT |
| 108971 | TruSeqV2    | 7:87029687 | 3'UTR    | A/A | 8.88E-16 | 0 | 0 | 56 | 99 | 1/1 | NC | 1/1 | missing<br>GT | match | missing<br>GT |
| 115239 | TruSeqV2    | 7:87029687 | 3'UTR    | A/A | 8.88E-16 | 0 | 0 | 46 | 99 | 1/1 | NC | 1/1 | missing<br>GT | match | missing<br>GT |
| 132306 | Agilent38MB | 7:87029687 | 3'UTR    | A/A | 8.88E-16 | 0 | 0 | 45 | 99 | 1/1 | NC | 1/1 | missing<br>GT | match | missing<br>GT |
| 163383 | TruSeqV2    | 7:87029687 | 3'UTR    | A/A | 8.88E-16 | 0 | 0 | 46 | 99 | 1/1 | NC | 1/1 | missing<br>GT | match | missing<br>GT |
| 198564 | Agilent38MB | 7:87029687 | 3'UTR    | A/G | 9.10E-15 | 0 | 0 | 42 | 99 | 0/1 | NC | 0/1 | missing<br>GT | match | missing<br>GT |
| 108971 | TruSeqV2    | 7:87030903 | 3'UTR    | A/A | 1.55E-15 | 0 | 0 | 39 | 99 | 1/1 | NC | 1/1 | missing<br>GT | match | missing<br>GT |
| 115239 | TruSeqV2    | 7:87030903 | 3'UTR    | A/A | 2.22E-15 | 0 | 0 | 35 | 18 | 1/1 | NC | 1/1 | missing<br>GT | match | missing<br>GT |

|        |             |            |          |     |            |   |   |    |    |     |    |     |               |       |               |
|--------|-------------|------------|----------|-----|------------|---|---|----|----|-----|----|-----|---------------|-------|---------------|
| 132306 | Agilent38MB | 7:87030903 | 3'UTR    | A/A | 6.66E-16   | 0 | 0 | 46 | 99 | 1/1 | NC | 1/1 | missing<br>GT | match | missing<br>GT |
| 163383 | TruSeqV2    | 7:87030903 | 3'UTR    | A/A | 2.44E-15   | 0 | 0 | 52 | 99 | 1/1 | NC | 1/1 | missing<br>GT | match | missing<br>GT |
| 198564 | Agilent38MB | 7:87030903 | 3'UTR    | A/A | 3.31E-13   | 0 | 0 | 45 | 99 | 1/1 | NC | 1/1 | missing<br>GT | match | missing<br>GT |
| 108971 | TruSeqV2    | 7:87105795 | promoter | T/T | 8.88E-16   | 0 | 0 | 39 | 99 | 0/0 | NC | 0/0 | missing<br>GT | match | missing<br>GT |
| 115239 | TruSeqV2    | 7:87105795 | promoter | T/T | 4.17E-14   | 0 | 0 | 41 | 99 | 0/0 | NC | 0/0 | missing<br>GT | match | missing<br>GT |
| 132306 | Agilent38MB | 7:87105795 | promoter | T/T | 6.66E-16   | 0 | 0 | 37 | 93 | 0/0 | NC | 0/0 | missing<br>GT | match | missing<br>GT |
| 163383 | TruSeqV2    | 7:87105795 | promoter | T/C | 5.66E-11   | 0 | 0 | 37 | 99 | 0/1 | NC | 0/1 | missing<br>GT | match | missing<br>GT |
| 198564 | Agilent38MB | 7:87105795 | promoter | T/T | 7.77E-15   | 0 | 0 | 44 | 99 | 0/0 | NC | 0/0 | missing<br>GT | match | missing<br>GT |
| 132306 | Agilent38MB | 7:87105812 | promoter | G/G | 0.00084305 | 0 | 0 | 33 | 99 | 0/0 | NC | 0/0 | missing<br>GT | match | missing<br>GT |
| 108971 | TruSeqV2    | 7:87106265 | promoter | A/A | 1.11E-15   | 0 | 0 | 48 | 99 | 0/0 | NC | 0/0 | missing<br>GT | match | missing<br>GT |
| 115239 | TruSeqV2    | 7:87106265 | promoter | A/A | 3.69E-14   | 0 | 0 | 40 | 99 | 0/0 | NC | 0/0 | missing<br>GT | match | missing<br>GT |
| 163383 | TruSeqV2    | 7:87106265 | promoter | A/A | 4.44E-16   | 0 | 0 | 34 | 91 | 0/0 | NC | 0/0 | missing<br>GT | match | missing<br>GT |
| 108971 | TruSeqV2    | 7:87106365 | promoter | G/G | 2.66E-15   | 0 | 0 | 58 | 99 | 0/0 | NC | 0/0 | missing<br>GT | match | missing<br>GT |
| 115239 | TruSeqV2    | 7:87106365 | promoter | G/G | 1.84E-14   | 0 | 0 | 36 | 65 | 0/0 | NC | 0/0 | missing<br>GT | match | missing<br>GT |
| 132306 | Agilent38MB | 7:87106365 | promoter | G/G | 6.66E-16   | 0 | 0 | 42 | 99 | 0/0 | NC | 0/0 | missing<br>GT | match | missing<br>GT |
| 163383 | TruSeqV2    | 7:87106365 | promoter | G/A | 1.33E-15   | 0 | 0 | 46 | 99 | 0/1 | NC | 0/1 | missing<br>GT | match | missing<br>GT |
| 198564 | Agilent38MB | 7:87106365 | promoter | G/G | 4.66E-15   | 0 | 0 | 58 | 99 | 0/0 | NC | 0/0 | missing<br>GT | match | missing<br>GT |
| 108971 | TruSeqV2    | 7:87106702 | promoter | A/A | 1.33E-15   | 0 | 0 | 59 | 99 | 0/0 | NC | 0/0 | missing<br>GT | match | missing<br>GT |
| 115239 | TruSeqV2    | 7:87106702 | promoter | A/A | 2.44E-14   | 0 | 0 | 49 | 99 | 0/0 | NC | 0/0 | missing<br>GT | match | missing<br>GT |

|        |             |            |          |     |          |   |   |    |    |     |    |     |               |       |               |
|--------|-------------|------------|----------|-----|----------|---|---|----|----|-----|----|-----|---------------|-------|---------------|
| 132306 | Agilent38MB | 7:87106702 | promoter | A/A | 4.44E-16 | 0 | 0 | 36 | 99 | 0/0 | NC | 0/0 | missing<br>GT | match | missing<br>GT |
| 163383 | TruSeqV2    | 7:87106702 | promoter | A/A | 8.88E-16 | 0 | 0 | 47 | 99 | 0/0 | NC | 0/0 | missing<br>GT | match | missing<br>GT |
| 198564 | Agilent38MB | 7:87106702 | promoter | A/A | 1.33E-15 | 0 | 0 | 47 | 99 | 0/0 | NC | 0/0 | missing<br>GT | match | missing<br>GT |
| 132306 | Agilent38MB | 7:87133366 | 3'UTR    | T/T | 4.44E-15 | 0 | 0 | 34 | 93 | 0/0 | NC | 0/0 | missing<br>GT | match | missing<br>GT |
| 198564 | Agilent38MB | 7:87133366 | 3'UTR    | T/T | 8.88E-16 | 0 | 0 | 54 | 99 | 0/0 | NC | 0/0 | missing<br>GT | match | missing<br>GT |
| 198564 | Agilent38MB | 7:87230193 | 5'UTR    | A/A | 1.55E-15 | 0 | 0 | 38 | 87 | 0/0 | NC | 0/0 | missing<br>GT | match | missing<br>GT |
| 108971 | TruSeqV2    | 7:91738788 | intronic | C/C | 8.88E-16 | 0 | 0 | 38 | 90 | 0/0 | NC | 0/0 | missing<br>GT | match | missing<br>GT |
| 115239 | TruSeqV2    | 7:91738788 | intronic | C/G | 3.77E-15 | 0 | 0 | 46 | 99 | 0/1 | NC | 0/1 | missing<br>GT | match | missing<br>GT |
| 132306 | Agilent38MB | 7:91738788 | intronic | C/C | 8.88E-16 | 0 | 0 | 42 | 99 | 0/0 | NC | 0/0 | missing<br>GT | match | missing<br>GT |
| 163383 | TruSeqV2    | 7:91738788 | intronic | C/C | 2.89E-15 | 0 | 0 | 52 | 99 | 0/0 | NC | 0/0 | missing<br>GT | match | missing<br>GT |
| 198564 | Agilent38MB | 7:91738788 | intronic | C/C | 5.77E-15 | 0 | 0 | 63 | 99 | 0/0 | NC | 0/0 | missing<br>GT | match | missing<br>GT |
| 132306 | Agilent38MB | 7:91742728 | 3'UTR    | G/C | 5.02E-13 | 0 | 0 | 33 | 99 | 0/1 | NC | 0/1 | missing<br>GT | match | missing<br>GT |
| 198564 | Agilent38MB | 7:91742728 | 3'UTR    | G/C | 2.89E-15 | 0 | 0 | 47 | 99 | 0/1 | NC | 0/1 | missing<br>GT | match | missing<br>GT |
| 108971 | TruSeqV2    | 7:91743685 | intronic | A/A | 4.44E-16 | 0 | 0 | 46 | 99 | 0/0 | NC | 0/0 | missing<br>GT | match | missing<br>GT |
| 115239 | TruSeqV2    | 7:91743685 | intronic | A/A | 4.44E-16 | 0 | 0 | 47 | 55 | 0/0 | NC | 0/0 | missing<br>GT | match | missing<br>GT |
| 132306 | Agilent38MB | 7:91743685 | intronic | A/A | 4.44E-16 | 0 | 0 | 44 | 99 | 0/0 | NC | 0/0 | missing<br>GT | match | missing<br>GT |
| 163383 | TruSeqV2    | 7:91743685 | intronic | A/A | 4.44E-16 | 0 | 0 | 47 | 99 | 0/0 | NC | 0/0 | missing<br>GT | match | missing<br>GT |
| 198564 | Agilent38MB | 7:91743685 | intronic | A/A | 1.11E-15 | 0 | 0 | 47 | 99 | 0/0 | NC | 0/0 | missing<br>GT | match | missing<br>GT |
| 132306 | Agilent38MB | 7:94925304 | 3'UTR    | C/C | 4.44E-16 | 0 | 0 | 34 | 84 | 0/0 | NC | 0/0 | missing<br>GT | match | missing<br>GT |



|        |             |            |          |     |          |   |   |    |    |     |    |     |               |       |               |
|--------|-------------|------------|----------|-----|----------|---|---|----|----|-----|----|-----|---------------|-------|---------------|
| 198564 | Agilent38MB | 7:94925304 | 3'UTR    | C/C | 3.09E-14 | 0 | 0 | 38 | 99 | 0/0 | NC | 0/0 | missing<br>GT | match | missing<br>GT |
| 108971 | TruSeqV2    | 7:94954745 | promoter | C/C | 2.44E-15 | 0 | 0 | 40 | 99 | 0/0 | NC | 0/0 | missing<br>GT | match | missing<br>GT |
| 115239 | TruSeqV2    | 7:94954745 | promoter | C/C | 2.22E-15 | 0 | 0 | 43 | 99 | 0/0 | NC | 0/0 | missing<br>GT | match | missing<br>GT |
| 132306 | Agilent38MB | 7:94954745 | promoter | C/C | 4.00E-15 | 0 | 0 | 35 | 93 | 0/0 | NC | 0/0 | missing<br>GT | match | missing<br>GT |
| 163383 | TruSeqV2    | 7:94954745 | promoter | C/C | 6.66E-16 | 0 | 0 | 33 | 90 | 0/0 | NC | 0/0 | missing<br>GT | match | missing<br>GT |
| 198564 | Agilent38MB | 7:94954745 | promoter | C/C | 4.44E-16 | 0 | 0 | 38 | 93 | 0/0 | NC | 0/0 | missing<br>GT | match | missing<br>GT |
| 108971 | TruSeqV2    | 7:95026160 | promoter | G/G | 9.10E-15 | 0 | 0 | 41 | 99 | 0/0 | NC | 0/0 | missing<br>GT | match | missing<br>GT |
| 115239 | TruSeqV2    | 7:95026160 | promoter | G/C | 2.00E-15 | 0 | 0 | 28 | 99 | 0/1 | NC | 0/1 | missing<br>GT | match | missing<br>GT |
| 132306 | Agilent38MB | 7:95026160 | promoter | G/G | 1.55E-15 | 0 | 0 | 39 | 99 | 0/0 | NC | 0/0 | missing<br>GT | match | missing<br>GT |
| 163383 | TruSeqV2    | 7:95026160 | promoter | G/G | 1.33E-15 | 0 | 0 | 31 | 87 | 0/0 | NC | 0/0 | missing<br>GT | match | missing<br>GT |
| 198564 | Agilent38MB | 7:95026160 | promoter | G/G | 7.55E-15 | 0 | 0 | 34 | 93 | 0/0 | NC | 0/0 | missing<br>GT | match | missing<br>GT |
| 108971 | TruSeqV2    | 7:95026229 | promoter | T/C | 8.04E-12 | 0 | 0 | 37 | 99 | 0/1 | NC | 0/1 | missing<br>GT | match | missing<br>GT |
| 115239 | TruSeqV2    | 7:95026229 | promoter | C/C | 1.33E-15 | 0 | 0 | 22 | 22 | 0/0 | NC | 0/0 | missing<br>GT | match | missing<br>GT |
| 132306 | Agilent38MB | 7:95026229 | promoter | C/C | 1.33E-15 | 0 | 0 | 29 | 78 | 0/0 | NC | 0/0 | missing<br>GT | match | missing<br>GT |
| 163383 | TruSeqV2    | 7:95026229 | promoter | C/C | 1.33E-15 | 0 | 0 | 31 | 76 | 0/0 | NC | 0/0 | missing<br>GT | match | missing<br>GT |
| 198564 | Agilent38MB | 7:95026229 | promoter | T/T | 2.13E-14 | 0 | 0 | 27 | 80 | 1/1 | NC | 1/1 | missing<br>GT | match | missing<br>GT |
| 108971 | TruSeqV2    | 7:95026327 | promoter | G/A | 2.27E-08 | 0 | 0 | 30 | 99 | 0/1 | NC | 0/1 | missing<br>GT | match | missing<br>GT |
| 115239 | TruSeqV2    | 7:95026327 | promoter | A/A | 1.11E-15 | 0 | 0 | 20 | 51 | 0/0 | NC | 0/0 | missing<br>GT | match | missing<br>GT |
| 163383 | TruSeqV2    | 7:95026327 | promoter | A/A | 1.55E-15 | 0 | 0 | 26 | 60 | 0/0 | NC | 0/0 | missing<br>GT | match | missing<br>GT |

|        |             |            |          |     |          |   |   |    |    |     |    |     |               |       |               |
|--------|-------------|------------|----------|-----|----------|---|---|----|----|-----|----|-----|---------------|-------|---------------|
| 108971 | TruSeqV2    | 7:95026408 | promoter | G/A | 1.36E-13 | 0 | 0 | 36 | 99 | 0/1 | NC | 0/1 | missing<br>GT | match | missing<br>GT |
| 115239 | TruSeqV2    | 7:95026408 | promoter | G/G | 6.77E-14 | 0 | 0 | 30 | 51 | 0/0 | NC | 0/0 | missing<br>GT | match | missing<br>GT |
| 163383 | TruSeqV2    | 7:95026408 | promoter | G/G | 4.22E-15 | 0 | 0 | 30 | 84 | 0/0 | NC | 0/0 | missing<br>GT | match | missing<br>GT |
| 198564 | Agilent38MB | 7:95026408 | promoter | A/A | 1.41E-07 | 0 | 0 | 37 | 99 | 1/1 | NC | 1/1 | missing<br>GT | match | missing<br>GT |
| 108971 | TruSeqV2    | 7:95026456 | promoter | G/G | 1.33E-15 | 0 | 0 | 38 | 99 | 0/0 | NC | 0/0 | missing<br>GT | match | missing<br>GT |
| 115239 | TruSeqV2    | 7:95026456 | promoter | G/G | 7.33E-15 | 0 | 0 | 35 | 61 | 0/0 | NC | 0/0 | missing<br>GT | match | missing<br>GT |
| 163383 | TruSeqV2    | 7:95026456 | promoter | G/G | 1.33E-14 | 0 | 0 | 39 | 96 | 0/0 | NC | 0/0 | missing<br>GT | match | missing<br>GT |
| 132306 | Agilent38MB | 7:95034036 | 3'UTR    | A/A | 6.66E-16 | 0 | 0 | 44 | 99 | 0/0 | NC | 0/0 | missing<br>GT | match | missing<br>GT |
| 108971 | TruSeqV2    | 7:95064821 | promoter | C/C | 2.89E-15 | 0 | 0 | 25 | 33 | 0/0 | NC | 0/0 | missing<br>GT | match | missing<br>GT |
| 132306 | Agilent38MB | 7:95064821 | promoter | C/C | 1.33E-15 | 0 | 0 | 25 | 63 | 0/0 | NC | 0/0 | missing<br>GT | match | missing<br>GT |
| 163383 | TruSeqV2    | 7:95064821 | promoter | C/C | 4.44E-16 | 0 | 0 | 28 | 69 | 0/0 | NC | 0/0 | missing<br>GT | match | missing<br>GT |
| 198564 | Agilent38MB | 7:95064821 | promoter | C/C | 6.66E-16 | 0 | 0 | 32 | 93 | 0/0 | NC | 0/0 | missing<br>GT | match | missing<br>GT |
| 198564 | Agilent38MB | 7:99270539 | splice   | C/C | 1.33E-15 | 0 | 0 | 43 | 99 | 0/0 | NC | 0/0 | missing<br>GT | match | missing<br>GT |
| 132306 | Agilent38MB | 7:99332807 | 5'UTR    | C/C | 8.88E-16 | 0 | 0 | 30 | 87 | 0/0 | NC | 0/0 | missing<br>GT | match | missing<br>GT |
| 132306 | Agilent38MB | 7:99332948 | promoter | T/T | 1.78E-15 | 0 | 0 | 33 | 93 | 0/0 | NC | 0/0 | missing<br>GT | match | missing<br>GT |
| 132306 | Agilent38MB | 7:99332997 | promoter | T/T | 2.03E-07 | 0 | 0 | 35 | 96 | 0/0 | NC | 0/0 | missing<br>GT | match | missing<br>GT |
| 132306 | Agilent38MB | 7:99333000 | promoter | A/A | 4.62E-14 | 0 | 0 | 34 | 87 | 0/0 | NC | 0/0 | missing<br>GT | match | missing<br>GT |
| 108971 | TruSeqV2    | 7:99333030 | promoter | G/G | 4.44E-16 | 0 | 0 | 53 | 99 | 0/0 | NC | 0/0 | missing<br>GT | match | missing<br>GT |
| 132306 | Agilent38MB | 7:99333030 | promoter | G/G | 6.66E-16 | 0 | 0 | 40 | 99 | 0/0 | NC | 0/0 | missing<br>GT | match | missing<br>GT |

|        |             |             |          |     |          |   |   |    |    |     |    |     |               |       |               |
|--------|-------------|-------------|----------|-----|----------|---|---|----|----|-----|----|-----|---------------|-------|---------------|
| 198564 | Agilent38MB | 7:99333030  | promoter | G/G | 8.88E-16 | 0 | 0 | 47 | 99 | 0/0 | NC | 0/0 | missing<br>GT | match | missing<br>GT |
| 108971 | TruSeqV2    | 7:99382096  | promoter | T/T | 1.78E-15 | 0 | 0 | 33 | 99 | 1/1 | NC | 1/1 | missing<br>GT | match | missing<br>GT |
| 115239 | TruSeqV2    | 7:99382096  | promoter | T/T | 8.88E-16 | 0 | 0 | 23 | 25 | 1/1 | NC | 1/1 | missing<br>GT | match | missing<br>GT |
| 132306 | Agilent38MB | 7:99382096  | promoter | T/T | 1.55E-15 | 0 | 0 | 32 | 96 | 1/1 | NC | 1/1 | missing<br>GT | match | missing<br>GT |
| 163383 | TruSeqV2    | 7:99382096  | promoter | T/T | 6.66E-16 | 0 | 0 | 42 | 99 | 1/1 | NC | 1/1 | missing<br>GT | match | missing<br>GT |
| 198564 | Agilent38MB | 7:99382096  | promoter | T/T | 8.88E-16 | 0 | 0 | 52 | 99 | 1/1 | NC | 1/1 | missing<br>GT | match | missing<br>GT |
| 108971 | TruSeqV2    | 7:99440694  | intronic | C/T | 6.62E-14 | 0 | 0 | 52 | 99 | 0/1 | NC | 0/1 | missing<br>GT | match | missing<br>GT |
| 115239 | TruSeqV2    | 7:99440694  | intronic | T/T | 3.77E-15 | 0 | 0 | 58 | 1  | 0/0 | NC | 0/0 | missing<br>GT | match | missing<br>GT |
| 132306 | Agilent38MB | 7:99440694  | intronic | C/C | 2.00E-15 | 0 | 0 | 56 | 99 | 1/1 | NC | 1/1 | missing<br>GT | match | missing<br>GT |
| 198564 | Agilent38MB | 7:99440694  | intronic | C/C | 4.09E-14 | 0 | 0 | 59 | 99 | 1/1 | NC | 1/1 | missing<br>GT | match | missing<br>GT |
| 108971 | TruSeqV2    | 8:143953937 | 3'UTR    | C/A | 8.88E-16 | 0 | 0 | 37 | 99 | 0/1 | NC | 0/1 | missing<br>GT | match | missing<br>GT |
| 115239 | TruSeqV2    | 8:143953937 | 3'UTR    | C/A | 4.44E-16 | 0 | 0 | 40 | 99 | 0/1 | NC | 0/1 | missing<br>GT | match | missing<br>GT |
| 132306 | Agilent38MB | 8:143953937 | 3'UTR    | C/A | 6.66E-16 | 0 | 0 | 31 | 99 | 0/1 | NC | 0/1 | missing<br>GT | match | missing<br>GT |
| 163383 | TruSeqV2    | 8:143953937 | 3'UTR    | C/A | 4.44E-16 | 0 | 0 | 42 | 99 | 0/1 | NC | 0/1 | missing<br>GT | match | missing<br>GT |
| 198564 | Agilent38MB | 8:143953937 | 3'UTR    | C/C | 4.00E-15 | 0 | 0 | 42 | 99 | 1/1 | NC | 1/1 | missing<br>GT | match | missing<br>GT |
| 115239 | TruSeqV2    | 8:143954290 | 3'UTR    | G/A | 4.22E-15 | 0 | 0 | 38 | 99 | 0/1 | NC | 0/1 | missing<br>GT | match | missing<br>GT |
| 132306 | Agilent38MB | 8:143954290 | 3'UTR    | G/A | 1.33E-15 | 0 | 0 | 28 | 99 | 0/1 | NC | 0/1 | missing<br>GT | match | missing<br>GT |
| 198564 | Agilent38MB | 8:143954290 | 3'UTR    | A/A | 3.33E-15 | 0 | 0 | 49 | 99 | 1/1 | NC | 1/1 | missing<br>GT | match | missing<br>GT |
| 132306 | Agilent38MB | 8:143954759 | 3'UTR    | C/C | 8.88E-16 | 0 | 0 | 38 | 99 | 0/0 | NC | 0/0 | missing<br>GT | match | missing<br>GT |

|        |             |             |          |     |          |   |   |    |    |     |    |     |               |       |               |
|--------|-------------|-------------|----------|-----|----------|---|---|----|----|-----|----|-----|---------------|-------|---------------|
| 132306 | Agilent38MB | 8:143954853 | 3'UTR    | C/C | 4.44E-16 | 0 | 0 | 39 | 99 | 0/0 | NC | 0/0 | missing<br>GT | match | missing<br>GT |
| 132306 | Agilent38MB | 8:143955074 | 3'UTR    | A/A | 3.55E-15 | 0 | 0 | 42 | 99 | 0/0 | NC | 0/0 | missing<br>GT | match | missing<br>GT |
| 198564 | Agilent38MB | 8:143955074 | 3'UTR    | A/A | 1.11E-15 | 0 | 0 | 42 | 99 | 0/0 | NC | 0/0 | missing<br>GT | match | missing<br>GT |
| 132306 | Agilent38MB | 8:143955095 | 3'UTR    | G/A | 6.00E-15 | 0 | 0 | 36 | 99 | 0/1 | NC | 0/1 | missing<br>GT | match | missing<br>GT |
| 198564 | Agilent38MB | 8:143955095 | 3'UTR    | G/G | 6.66E-16 | 0 | 0 | 41 | 99 | 1/1 | NC | 1/1 | missing<br>GT | match | missing<br>GT |
| 132306 | Agilent38MB | 8:143955097 | 3'UTR    | C/C | 1.11E-15 | 0 | 0 | 37 | 90 | 0/0 | NC | 0/0 | missing<br>GT | match | missing<br>GT |
| 198564 | Agilent38MB | 8:143955097 | 3'UTR    | C/C | 6.00E-15 | 0 | 0 | 42 | 99 | 0/0 | NC | 0/0 | missing<br>GT | match | missing<br>GT |
| 198564 | Agilent38MB | 8:143955113 | 3'UTR    | G/G | 1.71E-13 | 0 | 0 | 42 | 99 | 0/0 | NC | 0/0 | missing<br>GT | match | missing<br>GT |
| 198564 | Agilent38MB | 8:143955144 | 3'UTR    | T/T | 2.22E-16 | 0 | 0 | 42 | 99 | 0/0 | NC | 0/0 | missing<br>GT | match | missing<br>GT |
| 198564 | Agilent38MB | 8:143955221 | 3'UTR    | C/C | 4.44E-16 | 0 | 0 | 34 | 93 | 0/0 | NC | 0/0 | missing<br>GT | match | missing<br>GT |
| 132306 | Agilent38MB | 8:18067575  | intronic | A/A | 2.22E-16 | 0 | 0 | 29 | 87 | 0/0 | NC | 0/0 | missing<br>GT | match | missing<br>GT |
| 198564 | Agilent38MB | 8:18067575  | intronic | A/A | 1.33E-15 | 0 | 0 | 35 | 90 | 0/0 | NC | 0/0 | missing<br>GT | match | missing<br>GT |
| 132306 | Agilent38MB | 8:18079213  | intronic | C/C | 2.22E-16 | 0 | 0 | 39 | 99 | 0/0 | NC | 0/0 | missing<br>GT | match | missing<br>GT |
| 198564 | Agilent38MB | 8:18079213  | intronic | C/C | 8.88E-16 | 0 | 0 | 64 | 99 | 0/0 | NC | 0/0 | missing<br>GT | match | missing<br>GT |
| 132306 | Agilent38MB | 8:18080747  | 3'UTR    | G/G | 7.63E-12 | 0 | 0 | 27 | 81 | 1/1 | NC | 1/1 | missing<br>GT | match | missing<br>GT |
| 198564 | Agilent38MB | 8:18080747  | 3'UTR    | G/T | 1.60E-14 | 0 | 0 | 45 | 99 | 0/1 | NC | 0/1 | missing<br>GT | match | missing<br>GT |
| 108971 | TruSeqV2    | 8:27348788  | synon    | C/C | 5.76E-09 | 0 | 0 | 3  | 9  | 0/0 | NC | 0/0 | missing<br>GT | match | missing<br>GT |
| 115239 | TruSeqV2    | 8:27348788  | synon    | C/C | 6.66E-16 | 0 | 0 | 9  | 21 | 0/0 | NC | 0/0 | missing<br>GT | match | missing<br>GT |
| 163383 | TruSeqV2    | 8:27348788  | synon    | C/C | 6.66E-16 | 0 | 0 | 1  | 3  | 0/0 | NC | 0/0 | missing<br>GT | match | missing<br>GT |

|        |             |            |          |     |          |   |   |    |    |     |    |     |               |       |               |
|--------|-------------|------------|----------|-----|----------|---|---|----|----|-----|----|-----|---------------|-------|---------------|
| 132306 | Agilent38MB | 8:59403576 | 3'UTR    | T/T | 1.87E-14 | 0 | 0 | 32 | 96 | 1/1 | NC | 1/1 | missing<br>GT | match | missing<br>GT |
| 198564 | Agilent38MB | 8:59403576 | 3'UTR    | C/C | 3.77E-15 | 0 | 0 | 42 | 99 | 0/0 | NC | 0/0 | missing<br>GT | match | missing<br>GT |
| 108971 | TruSeqV2    | 8:59412924 | promoter | G/G | 2.22E-15 | 0 | 0 | 38 | 99 | 0/0 | NC | 0/0 | missing<br>GT | match | missing<br>GT |
| 132306 | Agilent38MB | 8:59412924 | promoter | T/T | 2.66E-15 | 0 | 0 | 35 | 99 | 1/1 | NC | 1/1 | missing<br>GT | match | missing<br>GT |
| 198564 | Agilent38MB | 8:59412924 | promoter | T/G | 6.66E-15 | 0 | 0 | 49 | 99 | 0/1 | NC | 0/1 | missing<br>GT | match | missing<br>GT |
| 108971 | TruSeqV2    | 8:59414401 | promoter | C/C | 1.78E-15 | 0 | 0 | 38 | 99 | 0/0 | NC | 0/0 | missing<br>GT | match | missing<br>GT |
| 115239 | TruSeqV2    | 8:59414401 | promoter | T/C | 1.78E-15 | 0 | 0 | 45 | 99 | 0/1 | NC | 0/1 | missing<br>GT | match | missing<br>GT |
| 132306 | Agilent38MB | 8:59414401 | promoter | T/T | 2.00E-15 | 0 | 0 | 44 | 99 | 1/1 | NC | 1/1 | missing<br>GT | match | missing<br>GT |
| 163383 | TruSeqV2    | 8:59414401 | promoter | T/C | 2.44E-15 | 0 | 0 | 35 | 99 | 0/1 | NC | 0/1 | missing<br>GT | match | missing<br>GT |
| 198564 | Agilent38MB | 8:59414401 | promoter | T/C | 1.55E-15 | 0 | 0 | 48 | 99 | 0/1 | NC | 0/1 | missing<br>GT | match | missing<br>GT |
| 108971 | TruSeqV2    | 8:59417107 | promoter | C/C | 2.66E-15 | 0 | 0 | 32 | 84 | 0/0 | NC | 0/0 | missing<br>GT | match | missing<br>GT |
| 115239 | TruSeqV2    | 8:59417107 | promoter | C/C | 6.66E-16 | 0 | 0 | 41 | 99 | 0/0 | NC | 0/0 | missing<br>GT | match | missing<br>GT |
| 132306 | Agilent38MB | 8:59417107 | promoter | C/C | 1.55E-15 | 0 | 0 | 32 | 87 | 0/0 | NC | 0/0 | missing<br>GT | match | missing<br>GT |
| 163383 | TruSeqV2    | 8:59417107 | promoter | C/C | 6.66E-16 | 0 | 0 | 39 | 99 | 0/0 | NC | 0/0 | missing<br>GT | match | missing<br>GT |
| 198564 | Agilent38MB | 8:59417107 | promoter | C/C | 1.33E-15 | 0 | 0 | 40 | 99 | 0/0 | NC | 0/0 | missing<br>GT | match | missing<br>GT |
| 108971 | TruSeqV2    | 8:59417753 | promoter | A/A | 9.99E-15 | 0 | 0 | 49 | 99 | 0/0 | NC | 0/0 | missing<br>GT | match | missing<br>GT |
| 115239 | TruSeqV2    | 8:59417753 | promoter | G/A | 2.22E-15 | 0 | 0 | 44 | 99 | 0/1 | NC | 0/1 | missing<br>GT | match | missing<br>GT |
| 163383 | TruSeqV2    | 8:59417753 | promoter | A/A | 2.89E-15 | 0 | 0 | 48 | 99 | 0/0 | NC | 0/0 | missing<br>GT | match | missing<br>GT |
| 198564 | Agilent38MB | 8:59417753 | promoter | A/A | 2.44E-14 | 0 | 0 | 41 | 99 | 0/0 | NC | 0/0 | missing<br>GT | match | missing<br>GT |

|        |             |            |          |     |            |   |   |    |    |     |    |     |               |       |               |
|--------|-------------|------------|----------|-----|------------|---|---|----|----|-----|----|-----|---------------|-------|---------------|
| 108971 | TruSeqV2    | 8:65702140 | promoter | A/A | 8.44E-08   | 0 | 0 | 43 | 99 | 0/0 | NC | 0/0 | missing<br>GT | match | missing<br>GT |
| 115239 | TruSeqV2    | 8:65702140 | promoter | A/A | 0.00059167 | 0 | 0 | 44 | 99 | 0/0 | NC | 0/0 | missing<br>GT | match | missing<br>GT |
| 132306 | Agilent38MB | 8:65702140 | promoter | T/A | 4.29E-12   | 0 | 0 | 44 | 99 | 0/1 | NC | 0/1 | missing<br>GT | match | missing<br>GT |
| 163383 | TruSeqV2    | 8:65702140 | promoter | T/A | 1.39E-12   | 0 | 0 | 38 | 99 | 0/1 | NC | 0/1 | missing<br>GT | match | missing<br>GT |
| 198564 | Agilent38MB | 8:65702140 | promoter | T/T | 9.66E-14   | 0 | 0 | 44 | 99 | 1/1 | NC | 1/1 | missing<br>GT | match | missing<br>GT |
| 108971 | TruSeqV2    | 8:65709467 | promoter | A/A | 1.79E-13   | 0 | 0 | 53 | 99 | 1/1 | NC | 1/1 | missing<br>GT | match | missing<br>GT |
| 132306 | Agilent38MB | 8:65709467 | promoter | G/A | 4.34E-12   | 0 | 0 | 34 | 99 | 0/1 | NC | 0/1 | missing<br>GT | match | missing<br>GT |
| 163383 | TruSeqV2    | 8:65709467 | promoter | G/A | 1.42E-12   | 0 | 0 | 46 | 99 | 0/1 | NC | 0/1 | missing<br>GT | match | missing<br>GT |
| 108971 | TruSeqV2    | 8:65720734 | promoter | A/A | 2.22E-16   | 0 | 0 | 29 | 78 | 0/0 | NC | 0/0 | missing<br>GT | match | missing<br>GT |
| 115239 | TruSeqV2    | 8:65720734 | promoter | A/A | 8.88E-16   | 0 | 0 | 28 | 41 | 0/0 | NC | 0/0 | missing<br>GT | match | missing<br>GT |
| 132306 | Agilent38MB | 8:65720734 | promoter | G/A | 1.69E-14   | 0 | 0 | 24 | 99 | 0/1 | NC | 0/1 | missing<br>GT | match | missing<br>GT |
| 163383 | TruSeqV2    | 8:65720734 | promoter | G/A | 6.06E-14   | 0 | 0 | 36 | 99 | 0/1 | NC | 0/1 | missing<br>GT | match | missing<br>GT |
| 198564 | Agilent38MB | 8:65720734 | promoter | G/G | 9.79E-14   | 0 | 0 | 42 | 99 | 1/1 | NC | 1/1 | missing<br>GT | match | missing<br>GT |
| 132306 | Agilent38MB | 8:70584628 | 3'UTR    | C/C | 2.44E-15   | 0 | 0 | 42 | 99 | 1/1 | NC | 1/1 | missing<br>GT | match | missing<br>GT |
| 198564 | Agilent38MB | 8:70584628 | 3'UTR    | C/C | 2.44E-15   | 0 | 0 | 48 | 99 | 1/1 | NC | 1/1 | missing<br>GT | match | missing<br>GT |
| 132306 | Agilent38MB | 8:70584809 | 3'UTR    | T/T | 8.88E-16   | 0 | 0 | 36 | 99 | 0/0 | NC | 0/0 | missing<br>GT | match | missing<br>GT |
| 198564 | Agilent38MB | 8:70584809 | 3'UTR    | T/G | 4.44E-16   | 0 | 0 | 26 | 99 | 0/1 | NC | 0/1 | missing<br>GT | match | missing<br>GT |
| 108971 | TruSeqV2    | 8:70605072 | intronic | G/G | 4.19E-11   | 0 | 0 | 64 | 99 | 0/0 | NC | 0/0 | missing<br>GT | match | missing<br>GT |
| 115239 | TruSeqV2    | 8:70605072 | intronic | G/G | 1.40E-14   | 0 | 0 | 59 | 90 | 0/0 | NC | 0/0 | missing<br>GT | match | missing<br>GT |

|        |             |             |          |                                                     |          |   |   |    |    |     |    |     |               |       |               |
|--------|-------------|-------------|----------|-----------------------------------------------------|----------|---|---|----|----|-----|----|-----|---------------|-------|---------------|
| 132306 | Agilent38MB | 8:70605072  | intronic | G/G                                                 | 9.55E-11 | 0 | 0 | 36 | 96 | 0/0 | NC | 0/0 | missing<br>GT | match | missing<br>GT |
| 163383 | TruSeqV2    | 8:70605072  | intronic | G/G                                                 | 5.33E-11 | 0 | 0 | 37 | 99 | 0/0 | NC | 0/0 | missing<br>GT | match | missing<br>GT |
| 198564 | Agilent38MB | 8:70605072  | intronic | G/G                                                 | 2.09E-12 | 0 | 0 | 53 | 99 | 0/0 | NC | 0/0 | missing<br>GT | match | missing<br>GT |
| 132306 | Agilent38MB | 8:70745171  | 5'UTR    | C/C                                                 | 2.42E-08 | 0 | 0 | 10 | 18 | 0/0 | NC | 0/0 | missing<br>GT | match | missing<br>GT |
| 198564 | Agilent38MB | 8:70745171  | 5'UTR    | C/A                                                 | 9.13E-13 | 0 | 0 | 18 | 99 | 0/1 | NC | 0/1 | missing<br>GT | match | missing<br>GT |
| 132306 | Agilent38MB | 9:137330562 | 3'UTR    | G/G                                                 | 1.16E-12 | 0 | 0 | 21 | 57 | 0/0 | NC | 0/0 | missing<br>GT | match | missing<br>GT |
| 132306 | Agilent38MB | 9:137331525 | 3'UTR    | C/G                                                 | 6.69E-13 | 0 | 0 | 19 | 99 | 0/1 | NC | 0/1 | missing<br>GT | match | missing<br>GT |
| 198564 | Agilent38MB | 9:137331525 | 3'UTR    | Possible<br>rare allele                             | 9.16E-10 | 0 | 0 | 32 | 95 | 1/1 | NC | 1/1 | missing<br>GT | match | missing<br>GT |
| 108971 | TruSeqV2    | 9:75568387  | promoter | CCAGGGT<br>TCTCTCC<br>TCA/CCAG<br>GGTTCTC<br>TCCTCA | 2.28E-13 | 0 | 0 | 40 | 87 | 0/0 | NC | 0/0 | missing<br>GT | match | missing<br>GT |
| 115239 | TruSeqV2    | 9:75568387  | promoter | CCAGGGT<br>TCTCTCC<br>TCA/CCAG<br>GGTTCTC<br>TCCTCA | 1.14E-13 | 0 | 0 | 40 | 87 | 0/0 | NC | 0/0 | missing<br>GT | match | missing<br>GT |
| 132306 | Agilent38MB | 9:75568387  | promoter | CCAGGGT<br>TCTCTCC<br>TCA/CCAG<br>GGTTCTC<br>TCCTCA | 4.84E-12 | 0 | 0 | 40 | 87 | 0/0 | NC | 0/0 | missing<br>GT | match | missing<br>GT |
| 163383 | TruSeqV2    | 9:75568387  | promoter | CCAGGGT<br>TCTCTCC<br>TCA/CCAG<br>GGTTCTC<br>TCCTCA | 3.23E-13 | 0 | 0 | 40 | 87 | 0/0 | NC | 0/0 | missing<br>GT | match | missing<br>GT |

CCAGGGT  
TCTCTCC  
TCA/CCAG  
GGTTCTC  
TCCTCA

|        |             |            |          |     |          |   |   |    |    |     |    |     |               |       |               |
|--------|-------------|------------|----------|-----|----------|---|---|----|----|-----|----|-----|---------------|-------|---------------|
| 198564 | Agilent38MB | 9:75568387 | promoter |     | 8.33E-13 | 0 | 0 | 40 | 87 | 0/0 | NC | 0/0 | missing<br>GT | match | missing<br>GT |
| 108971 | TruSeqV2    | 9:75568477 | promoter | -/- | 2.93E-13 | 0 | 0 | 35 | 93 | 0/0 | NC | 0/0 | missing<br>GT | match | missing<br>GT |
| 115239 | TruSeqV2    | 9:75568477 | promoter | -/- | 2.32E-11 | 0 | 0 | 35 | 93 | 0/0 | NC | 0/0 | missing<br>GT | match | missing<br>GT |
| 132306 | Agilent38MB | 9:75568477 | promoter | -/- | 7.82E-11 | 0 | 0 | 35 | 93 | 0/0 | NC | 0/0 | missing<br>GT | match | missing<br>GT |
| 163383 | TruSeqV2    | 9:75568477 | promoter | -/- | 2.54E-12 | 0 | 0 | 35 | 93 | 0/0 | NC | 0/0 | missing<br>GT | match | missing<br>GT |
| 198564 | Agilent38MB | 9:75568477 | promoter | -/- | 4.63E-13 | 0 | 0 | 35 | 93 | 0/0 | NC | 0/0 | missing<br>GT | match | missing<br>GT |
| 108971 | TruSeqV2    | 9:86983368 | 5'UTR    | T/T | 4.44E-16 | 0 | 0 | 32 | 51 | 0/0 | NC | 0/0 | missing<br>GT | match | missing<br>GT |
| 115239 | TruSeqV2    | 9:86983368 | 5'UTR    | T/T | 4.44E-16 | 0 | 0 | 29 | 69 | 0/0 | NC | 0/0 | missing<br>GT | match | missing<br>GT |
| 163383 | TruSeqV2    | 9:86983368 | 5'UTR    | T/T | 4.44E-16 | 0 | 0 | 40 | 99 | 0/0 | NC | 0/0 | missing<br>GT | match | missing<br>GT |
| 198564 | Agilent38MB | 9:86983368 | 5'UTR    | T/T | 8.88E-16 | 0 | 0 | 38 | 93 | 0/0 | NC | 0/0 | missing<br>GT | match | missing<br>GT |
| 108971 | TruSeqV2    | X:46445660 | intronic | G   | 3.33E-15 | 0 | 0 | 11 | 33 | 0/0 | NC | 0/0 | missing<br>GT | match | missing<br>GT |
| 163383 | TruSeqV2    | X:46445660 | intronic | G   | 2.44E-15 | 0 | 0 | 20 | 57 | 0/0 | NC | 0/0 | missing<br>GT | match | missing<br>GT |
| 198564 | Agilent38MB | X:46445660 | intronic | A   | 8.88E-16 | 0 | 0 | 19 | 57 | 1/1 | NC | 1/1 | missing<br>GT | match | missing<br>GT |
| 108971 | TruSeqV2    | X:46449664 | intronic | A   | 6.66E-16 | 0 | 0 | 20 | 48 | 0/0 | NC | 0/0 | missing<br>GT | match | missing<br>GT |
| 115239 | TruSeqV2    | X:46449664 | intronic | A   | 6.66E-16 | 0 | 0 | 16 | 39 | 0/0 | NC | 0/0 | missing<br>GT | match | missing<br>GT |
| 132306 | Agilent38MB | X:46449664 | intronic | A   | 4.44E-16 | 0 | 0 | 13 | 27 | 0/0 | NC | 0/0 | missing<br>GT | match | missing<br>GT |
| 163383 | TruSeqV2    | X:46449664 | intronic | A   | 4.44E-16 | 0 | 0 | 17 | 45 | 0/0 | NC | 0/0 | missing<br>GT | match | missing<br>GT |



|        |             |            |          |   |          |   |   |    |    |     |    |     |               |       |               |
|--------|-------------|------------|----------|---|----------|---|---|----|----|-----|----|-----|---------------|-------|---------------|
| 198564 | Agilent38MB | X:46449664 | intronic | A | 7.99E-15 | 0 | 0 | 18 | 48 | 0/0 | NC | 0/0 | missing<br>GT | match | missing<br>GT |
| 108971 | TruSeqV2    | X:46454265 | intronic | C | 2.22E-15 | 0 | 0 | 16 | 36 | 0/0 | NC | 0/0 | missing<br>GT | match | missing<br>GT |
| 115239 | TruSeqV2    | X:46454265 | intronic | C | 1.33E-15 | 0 | 0 | 24 | 72 | 0/0 | NC | 0/0 | missing<br>GT | match | missing<br>GT |
| 132306 | Agilent38MB | X:46454265 | intronic | C | 8.88E-15 | 0 | 0 | 14 | 41 | 0/0 | NC | 0/0 | missing<br>GT | match | missing<br>GT |
| 163383 | TruSeqV2    | X:46454265 | intronic | C | 1.11E-15 | 0 | 0 | 29 | 70 | 0/0 | NC | 0/0 | missing<br>GT | match | missing<br>GT |
| 198564 | Agilent38MB | X:46454265 | intronic | C | 2.22E-16 | 0 | 0 | 22 | 51 | 0/0 | NC | 0/0 | missing<br>GT | match | missing<br>GT |
| 132306 | Agilent38MB | X:46457221 | 3'UTR    | G | 6.66E-16 | 0 | 0 | 15 | 42 | 0/0 | NC | 0/0 | missing<br>GT | match | missing<br>GT |
| 198564 | Agilent38MB | X:46457221 | 3'UTR    | G | 6.66E-16 | 0 | 0 | 24 | 69 | 0/0 | NC | 0/0 | missing<br>GT | match | missing<br>GT |
| 132306 | Agilent38MB | X:46457786 | 3'UTR    | G | 2.66E-15 | 0 | 0 | 19 | 48 | 0/0 | NC | 0/0 | missing<br>GT | match | missing<br>GT |
| 198564 | Agilent38MB | X:46457786 | 3'UTR    | A | 1.78E-15 | 0 | 0 | 29 | 86 | 1/1 | NC | 1/1 | missing<br>GT | match | missing<br>GT |
| 108971 | TruSeqV2    | X:46458623 | 3'UTR    | T | 4.44E-16 | 0 | 0 | 23 | 69 | 1/1 | NC | 1/1 | missing<br>GT | match | missing<br>GT |
| 115239 | TruSeqV2    | X:46458623 | 3'UTR    | T | 6.66E-16 | 0 | 0 | 20 | 16 | 1/1 | NC | 1/1 | missing<br>GT | match | missing<br>GT |
| 132306 | Agilent38MB | X:46458623 | 3'UTR    | G | 1.15E-14 | 0 | 0 | 14 | 33 | 0/0 | NC | 0/0 | missing<br>GT | match | missing<br>GT |
| 163383 | TruSeqV2    | X:46458623 | 3'UTR    | T | 2.89E-15 | 0 | 0 | 15 | 45 | 1/1 | NC | 1/1 | missing<br>GT | match | missing<br>GT |
| 108971 | TruSeqV2    | X:46460615 | 3'UTR    | C | 1.11E-15 | 0 | 0 | 26 | 57 | 0/0 | NC | 0/0 | missing<br>GT | match | missing<br>GT |
| 115239 | TruSeqV2    | X:46460615 | 3'UTR    | C | 6.66E-16 | 0 | 0 | 30 | 90 | 0/0 | NC | 0/0 | missing<br>GT | match | missing<br>GT |
| 132306 | Agilent38MB | X:46460615 | 3'UTR    | C | 1.55E-15 | 0 | 0 | 17 | 36 | 0/0 | NC | 0/0 | missing<br>GT | match | missing<br>GT |
| 163383 | TruSeqV2    | X:46460615 | 3'UTR    | C | 2.22E-15 | 0 | 0 | 20 | 54 | 0/0 | NC | 0/0 | missing<br>GT | match | missing<br>GT |
| 198564 | Agilent38MB | X:46460615 | 3'UTR    | C | 1.55E-15 | 0 | 0 | 16 | 42 | 0/0 | NC | 0/0 | missing<br>GT | match | missing<br>GT |

|        |             |              |          |                         |          |   |   |    |    |     |    |     |               |          |               |
|--------|-------------|--------------|----------|-------------------------|----------|---|---|----|----|-----|----|-----|---------------|----------|---------------|
| 108971 | TruSeqV2    | X:74298421   | intronic | T                       | 8.88E-15 | 0 | 0 | 29 | 87 | 0/0 | NC | 0/0 | missing<br>GT | match    | missing<br>GT |
| 115239 | TruSeqV2    | X:74298421   | intronic | T                       | 2.13E-14 | 0 | 0 | 30 | 54 | 0/0 | NC | 0/0 | missing<br>GT | match    | missing<br>GT |
| 132306 | Agilent38MB | X:74298421   | intronic | T                       | 1.78E-15 | 0 | 0 | 16 | 22 | 0/0 | NC | 0/0 | missing<br>GT | match    | missing<br>GT |
| 163383 | TruSeqV2    | X:74298421   | intronic | T                       | 2.00E-15 | 0 | 0 | 22 | 54 | 0/0 | NC | 0/0 | missing<br>GT | match    | missing<br>GT |
| 198564 | Agilent38MB | X:74298421   | intronic | T                       | 1.93E-14 | 0 | 0 | 32 | 80 | 0/0 | NC | 0/0 | missing<br>GT | match    | missing<br>GT |
| 108971 | TruSeqV2    | X:74299007   | intronic | T                       | 1.33E-15 | 0 | 0 | 15 | 45 | 0/0 | NC | 0/0 | missing<br>GT | match    | missing<br>GT |
| 115239 | TruSeqV2    | X:74299007   | intronic | T                       | 6.66E-16 | 0 | 0 | 27 | 69 | 0/0 | NC | 0/0 | missing<br>GT | match    | missing<br>GT |
| 132306 | Agilent38MB | X:74299007   | intronic | T                       | 4.44E-16 | 0 | 0 | 18 | 48 | 0/0 | NC | 0/0 | missing<br>GT | match    | missing<br>GT |
| 163383 | TruSeqV2    | X:74299007   | intronic | T                       | 6.66E-16 | 0 | 0 | 23 | 66 | 0/0 | NC | 0/0 | missing<br>GT | match    | missing<br>GT |
| 198564 | Agilent38MB | X:74299007   | intronic | T                       | 7.48E-14 | 0 | 0 | 26 | 75 | 0/0 | NC | 0/0 | missing<br>GT | match    | missing<br>GT |
| 115239 | TruSeqV2    | 12:105152391 | 3'UTR    | G/G                     | 4.44E-16 | 0 | 0 | 36 | 50 | 1/1 | NC | 0/1 | missing<br>GT | mismatch | missing<br>GT |
| 115239 | TruSeqV2    | 12:105154087 | 3'UTR    | A/A                     | 2.00E-15 | 0 | 0 | 33 | 23 | 1/1 | NC | 0/1 | missing<br>GT | mismatch | missing<br>GT |
| 115239 | TruSeqV2    | 15:75039613  | promoter | -/T                     | 5.33E-15 | 0 | 0 | 27 | 75 | 0/1 | NC | 0/0 | missing<br>GT | mismatch | missing<br>GT |
| 198564 | Agilent38MB | 15:75039613  | promoter | -/T                     | 2.26E-14 | 0 | 0 | 27 | 75 | 0/1 | NC | 0/0 | missing<br>GT | mismatch | missing<br>GT |
| 115239 | TruSeqV2    | 16:29661217  | intronic | C/C                     | 6.00E-15 | 0 | 0 | 28 | 35 | 0/0 | NC | 0/1 | missing<br>GT | mismatch | missing<br>GT |
| 108971 | TruSeqV2    | 16:31104402  | intronic | Possible<br>rare allele | 2.25E-10 | 0 | 0 | 25 | 99 | 1/1 | NC | 0/1 | missing<br>GT | mismatch | missing<br>GT |
| 108971 | TruSeqV2    | 19:41357344  | promoter | C/C                     | 5.16E-09 | 0 | 0 | 63 | 99 | 1/1 | NC | 0/1 | missing<br>GT | mismatch | missing<br>GT |
| 132306 | Agilent38MB | 19:41357344  | promoter | C/C                     | 1.88E-07 | 0 | 0 | 41 | 99 | 1/1 | NC | 0/1 | missing<br>GT | mismatch | missing<br>GT |
| 198564 | Agilent38MB | 19:41357344  | promoter | C/C                     | 5.97E-10 | 0 | 0 | 50 | 99 | 1/1 | NC | 0/1 | missing<br>GT | mismatch | missing<br>GT |

|        |             |             |                   |     |          |   |   |    |    |     |    |     |               |               |               |
|--------|-------------|-------------|-------------------|-----|----------|---|---|----|----|-----|----|-----|---------------|---------------|---------------|
| 115239 | TruSeqV2    | 3:142836966 | intergenic        | A/G | 4.86E-05 | 0 | 0 | 23 | 66 | 0/1 | NC | 0/0 | missing<br>GT | mismatch      | missing<br>GT |
| 132306 | Agilent38MB | 4:69512655  | 3'UTR             | A/A | 1.02E-14 | 0 | 0 | 47 | 60 | 1/1 | NC | 0/0 | missing<br>GT | mismatch      | missing<br>GT |
| 115239 | TruSeqV2    | 4:70724270  | intronic          | T/T | 1.20E-14 | 0 | 0 | 45 | 40 | 1/1 | NC | 0/1 | missing<br>GT | mismatch      | missing<br>GT |
| 108971 | TruSeqV2    | 5:74639259  | intronic          | G/G | 2.22E-16 | 0 | 0 | 39 | 99 | 1/1 | NC | 0/1 | missing<br>GT | mismatch      | missing<br>GT |
| 115239 | TruSeqV2    | 5:74639259  | intronic          | G/G | 2.22E-16 | 0 | 0 | 17 | 99 | 1/1 | NC | 0/1 | missing<br>GT | mismatch      | missing<br>GT |
| 132306 | Agilent38MB | 5:74639259  | intronic          | G/G | 2.22E-16 | 0 | 0 | 36 | 99 | 1/1 | NC | 0/1 | missing<br>GT | mismatch      | missing<br>GT |
| 198564 | Agilent38MB | 5:74639259  | intronic          | G/G | 4.44E-16 | 0 | 0 | 34 | 88 | 1/1 | NC | 0/0 | missing<br>GT | mismatch      | missing<br>GT |
| 163383 | TruSeqV2    | 7:99440694  | intronic          | T/T | 5.51E-13 | 0 | 0 | 45 | 99 | 0/0 | NC | 0/1 | missing<br>GT | mismatch      | missing<br>GT |
| 115239 | TruSeqV2    | 8:65709467  | promoter          | A/A | 1.15E-11 | 0 | 0 | 43 | 85 | 1/1 | NC | 0/1 | missing<br>GT | mismatch      | missing<br>GT |
| 115239 | TruSeqV2    | X:46445660  | intronic          | G   | 5.11E-15 | 0 | 0 | 14 | 46 | 0/0 | NC | 0/1 | missing<br>GT | mismatch      | missing<br>GT |
| 108971 | TruSeqV2    | 16:29474723 | alternate<br>exon | C/C | 4.22E-15 | 0 | 0 | 0  | 0  | 0/0 | NC | NC  | missing<br>GT | missing<br>GT | missing<br>GT |
| 115239 | TruSeqV2    | 16:29474723 | alternate<br>exon | C/C | 1.33E-15 | 0 | 0 | 0  | 0  | 0/0 | NC | NC  | missing<br>GT | missing<br>GT | missing<br>GT |
| 132306 | Agilent38MB | 16:29474723 | alternate<br>exon | C/C | 1.55E-15 | 0 | 0 | 0  | 0  | 0/0 | NC | NC  | missing<br>GT | missing<br>GT | missing<br>GT |
| 163383 | TruSeqV2    | 16:29474723 | alternate<br>exon | C/C | 1.33E-15 | 0 | 0 | 0  | 0  | 0/0 | NC | NC  | missing<br>GT | missing<br>GT | missing<br>GT |
| 198564 | Agilent38MB | 16:29474723 | alternate<br>exon | C/C | 8.66E-15 | 0 | 0 | 0  | 0  | 0/0 | NC | NC  | missing<br>GT | missing<br>GT | missing<br>GT |
| 108971 | TruSeqV2    | 16:29475588 | alternate<br>exon | G/G | 6.00E-12 | 0 | 0 | 0  | 0  | 0/0 | NC | NC  | missing<br>GT | missing<br>GT | missing<br>GT |
| 115239 | TruSeqV2    | 16:29475588 | alternate<br>exon | G/G | 9.94E-11 | 0 | 0 | 0  | 0  | 0/0 | NC | NC  | missing<br>GT | missing<br>GT | missing<br>GT |
| 132306 | Agilent38MB | 16:29475588 | alternate<br>exon | G/G | 5.22E-12 | 0 | 0 | 0  | 0  | 0/0 | NC | NC  | missing<br>GT | missing<br>GT | missing<br>GT |
| 163383 | TruSeqV2    | 16:29475588 | alternate<br>exon | G/G | 1.09E-10 | 0 | 0 | 0  | 0  | 0/0 | NC | NC  | missing<br>GT | missing<br>GT | missing<br>GT |

|        |             |             |                |     |          |   |   |   |   |     |    |    |         |         |         |
|--------|-------------|-------------|----------------|-----|----------|---|---|---|---|-----|----|----|---------|---------|---------|
| 198564 | Agilent38MB | 16:29475588 | alternate exon | G/G | 1.38E-13 | 0 | 0 | 0 | 0 | 0/0 | NC | NC | missing | missing | missing |
| 108971 | TruSeqV2    | 16:30214068 | missense       | C/C | 3.77E-15 | 0 | 0 | 0 | 0 | 0/0 | NC | NC | missing | missing | missing |
| 115239 | TruSeqV2    | 16:30214068 | missense       | C/C | 8.88E-16 | 0 | 0 | 0 | 0 | 0/0 | NC | NC | missing | missing | missing |
| 132306 | Agilent38MB | 16:30214068 | missense       | C/C | 1.33E-15 | 0 | 0 | 0 | 0 | 0/0 | NC | NC | missing | missing | missing |
| 163383 | TruSeqV2    | 16:30214068 | missense       | C/C | 8.88E-16 | 0 | 0 | 0 | 0 | 0/0 | NC | NC | missing | missing | missing |
| 198564 | Agilent38MB | 16:30214068 | missense       | C/C | 4.66E-15 | 0 | 0 | 0 | 0 | 0/0 | NC | NC | missing | missing | missing |
| 108971 | TruSeqV2    | 16:30214933 | missense       | G/G | 3.17E-10 | 0 | 0 | 0 | 0 | 0/0 | NC | NC | missing | missing | missing |
| 115239 | TruSeqV2    | 16:30214933 | missense       | G/G | 6.20E-10 | 0 | 0 | 0 | 0 | 0/0 | NC | NC | missing | missing | missing |
| 132306 | Agilent38MB | 16:30214933 | missense       | G/G | 5.12E-10 | 0 | 0 | 0 | 0 | 0/0 | NC | NC | missing | missing | missing |
| 163383 | TruSeqV2    | 16:30214933 | missense       | G/G | 4.33E-10 | 0 | 0 | 0 | 0 | 0/0 | NC | NC | missing | missing | missing |
| 198564 | Agilent38MB | 16:30214933 | missense       | G/G | 1.47E-11 | 0 | 0 | 0 | 0 | 0/0 | NC | NC | missing | missing | missing |
| 163383 | TruSeqV2    | 17:37824754 | missense       | A/A | 6.92E-11 | 0 | 0 | 0 | 0 | 0/0 | NC | NC | missing | missing | missing |
| 115239 | TruSeqV2    | 19:41357344 | promoter       | C/C | 6.96E-10 | 0 | 0 | 0 | 0 | 1/1 | NC | NC | missing | missing | missing |
| 108971 | TruSeqV2    | 22:24302486 | synon          | G/G | 3.19E-13 | 0 | 0 | 0 | 0 | 1/1 | NC | NC | missing | missing | missing |
| 115239 | TruSeqV2    | 22:24302486 | synon          | G/G | 1.95E-13 | 0 | 0 | 0 | 0 | 1/1 | NC | NC | missing | missing | missing |
| 132306 | Agilent38MB | 22:24302486 | synon          | G/G | 7.08E-14 | 0 | 0 | 0 | 0 | 1/1 | NC | NC | missing | missing | missing |
| 163383 | TruSeqV2    | 22:24302486 | synon          | G/G | 2.00E-15 | 0 | 0 | 0 | 0 | 1/1 | NC | NC | missing | missing | missing |
| 198564 | Agilent38MB | 22:24324821 | missense       | C/C | 6.66E-16 | 0 | 0 | 0 | 0 | 0/0 | NC | NC | missing | missing | missing |
| 132306 | Agilent38MB | 7:17338425  | 5'UTR          | G/G | 1.33E-15 | 0 | 0 | 0 | 0 | 0/0 | NC | NC | missing | missing | missing |

0/0, homozygous reference; 0/1, heterozygous; 1/1, homozygous variant; 3'UTR, 3 prime untranslated region; 5'UTR, 5 prime untranslated region; Chip, Affymetrix Drug Metabolizing Enzymes and Transporters chip; Chip call\*, chip genotype formatted for comparison with exomes and genomes; Chip confidence, the probability of the chip genotype call being incorrect; Chip-ES, comparison of chip and exome genotype concordance; Chip-GS, comparison of chip and genome genotype concordance; ES, exome sequence data; ES-GS, comparison of exome and genome genotype concordance; fs, frameshift; GRCh37, Genome Reference Consortium human genome (build 37); GQ, genotype quality score; GS, genome sequence data; GT, genotype; NC, no call; RD, read depth, synon, synonymous change.

Five ClinSeq samples (108971, 115239, 132306, 163383, 198564) were genotyped by chip, exome and genome sequencing. Genotype concordance were analyzed by comparing genotypes at 1,929 variant positions in a pairwise manner, chip vs. exome, chip vs. genome, and exome vs. genome.
